# Supplementary material for: Epilepsy and mortality: a retrospective cohort analysis with a nested case–control study identifying causes and risk factors from primary care and linkage-derived data
Source: PubMed Central journal article supplement — BMJ Open. 2021 Oct 25;11(10):e052841. doi: 10.1136/bmjopen-2021-052841 (PMC8547505; doi:10.1136/bmjopen-2021-052841), 2021-10-25
Supplement: bmjopen-2021-052841.draft_revisions.pdf [file bmjopen-2021-052841.draft_revisions.pdf]

# BMJ Open

BMJ Open is committed to open peer review. As part of this commitment we make the peer review history of every article we publish publicly available.

When an article is published we post the peer reviewers' comments and the authors' responses online. We also post the versions of the paper that were used during peer review. These are the versions that the peer review comments apply to.

The versions of the paper that follow are the versions that were submitted during the peer review process. They are not the versions of record or the final published versions. They should not be cited or distributed as the published version of this manuscript.

BMJ Open is an open access journal and the full, final, typeset and author-corrected version of record of the manuscript is available on our site with no access controls, subscription charges or pay-per-view fees (<http://bmjopen.bmj.com>).

If you have any questions on BMJ Open's open peer review process please email [info.bmjopen@bmj.com](mailto:info.bmjopen@bmj.com)

# BMJ Open

## **Epilepsy and mortality: a retrospective cohort analysis with a nested case-control study identifying causes and risk factors from primary care and linkage-derived data**

|                               |                                                                                                                                                                                                                                                                                                                                                                                                                                                                                                                                                                                                                                                                                   |
|-------------------------------|-----------------------------------------------------------------------------------------------------------------------------------------------------------------------------------------------------------------------------------------------------------------------------------------------------------------------------------------------------------------------------------------------------------------------------------------------------------------------------------------------------------------------------------------------------------------------------------------------------------------------------------------------------------------------------------|
| Journal:                      | <i>BMJ Open</i>                                                                                                                                                                                                                                                                                                                                                                                                                                                                                                                                                                                                                                                                   |
| Manuscript ID                 | bmjopen-2021-052841                                                                                                                                                                                                                                                                                                                                                                                                                                                                                                                                                                                                                                                               |
| Article Type:                 | Original research                                                                                                                                                                                                                                                                                                                                                                                                                                                                                                                                                                                                                                                                 |
| Date Submitted by the Author: | 27-Apr-2021                                                                                                                                                                                                                                                                                                                                                                                                                                                                                                                                                                                                                                                                       |
| Complete List of Authors:     | Wojewodka, Gabriella; King's College London Institute of Psychiatry Psychology and Neuroscience, Basic & Clinical Neuroscience<br>Gulliford, Martin; King's College London, School of Population Health and Environmental Sciences; NIHR Biomedical Research Centre at Guy's and Saint Thomas' NHS Foundation Trust and King's College<br>Ashworth, Mark; King's College London, School of Population Health & Environmental Sciences<br>Richardson, Mark; King's College London, Institute of Psychiatry, Psychology & Neuroscience<br>Ridsdale, Leone; King's College London Institute of Psychiatry Psychology and Neuroscience, Department of Basic and Clinical Neuroscience |
| Keywords:                     | Epilepsy < NEUROLOGY, PRIMARY CARE, EPIDEMIOLOGY                                                                                                                                                                                                                                                                                                                                                                                                                                                                                                                                                                                                                                  |
|                               |                                                                                                                                                                                                                                                                                                                                                                                                                                                                                                                                                                                                                                                                                   |

SCHOLARONE™  
Manuscripts

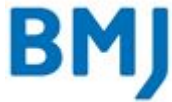

I, the Submitting Author has the right to grant and does grant on behalf of all authors of the Work (as defined in the below author licence), an exclusive licence and/or a non-exclusive licence for contributions from authors who are: i) UK Crown employees; ii) where BMJ has agreed a CC-BY licence shall apply, and/or iii) in accordance with the terms applicable for US Federal Government officers or employees acting as part of their official duties; on a worldwide, perpetual, irrevocable, royalty-free basis to BMJ Publishing Group Ltd ("BMJ") its licensees and where the relevant Journal is co-owned by BMJ to the co-owners of the Journal, to publish the Work in this journal and any other BMJ products and to exploit all rights, as set out in our [licence](#).

The Submitting Author accepts and understands that any supply made under these terms is made by BMJ to the Submitting Author unless you are acting as an employee on behalf of your employer or a postgraduate student of an affiliated institution which is paying any applicable article publishing charge ("APC") for Open Access articles. Where the Submitting Author wishes to make the Work available on an Open Access basis (and intends to pay the relevant APC), the terms of reuse of such Open Access shall be governed by a Creative Commons licence – details of these licences and which [Creative Commons](#) licence will apply to this Work are set out in our licence referred to above.

Other than as permitted in any relevant BMJ Author's Self Archiving Policies, I confirm this Work has not been accepted for publication elsewhere, is not being considered for publication elsewhere and does not duplicate material already published. I confirm all authors consent to publication of this Work and authorise the granting of this licence.

1  
2  
3 **Epilepsy and mortality: a retrospective cohort analysis with a nested case-control study**  
4 **identifying causes and risk factors from primary care and linkage-derived data**  
5

6 **Gabriella Wojewodka<sup>1</sup>, Martin Gulliford<sup>2,3</sup>, Mark Ashworth<sup>2</sup>, Mark P. Richardson<sup>1</sup>, Leone Ridsdale<sup>1</sup>**  
7

8 <sup>1</sup> King's College London, Institute of Psychiatry, Psychology and Neuroscience, Department of Basic and Clinical  
9 Neuroscience, London, UK.  
10

11 <sup>2</sup> King's College London, School of Population Health and Environmental Sciences, London, UK.  
12

13 <sup>3</sup> National Institute for Health Research Biomedical Research Centre at Guy's and St Thomas' Hospitals, London,  
14 UK  
15

16  
17  
18 Corresponding author: Dr. Gabriella Wojewodka, King's College London, IoPPN, 16 De Crespigny  
19 Park, PO63, London, UK, SE5 8AF. email: gabriella.wojewodka@kcl.ac.uk  
20  
21

22  
23  
24 WORD COUNT: 3308  
25  
26  
27  
28  
29  
30  
31  
32  
33  
34  
35  
36  
37  
38  
39  
40  
41  
42  
43  
44  
45  
46  
47  
48  
49  
50  
51  
52  
53  
54  
55  
56  
57  
58  
59  
60

## ABSTRACT

### Introduction

People with epilepsy (PWE) have a higher mortality rate than the general population. Epilepsy related deaths have increased despite all-cause mortality decreasing in the general population pre-Covid-19. We hypothesized that clinical and lifestyle factors may identify people more at risk.

### Methods

We explored factors associated with mortality using primary care population data from 01/04/2004 to 31/03/2014. Data was obtained from the Clinical Practice Research Datalink (CPRD) which compiles anonymised patient data from primary care in the UK. Cause of death data was supplemented from the Office of National Statistics when available.

### Results

The analysis included 70,431 people with epilepsy, with 11,241 registered deaths. The number of deaths within the database increased by 69% between the first and last year of the study. Epilepsy was considered as a contributing cause in approximately 45% of deaths of PWE under 35. Factors associated with increased risk of death included attendance at emergency departments and/or emergency admissions (OR: 3.06 CI: 2.83–3.31), anti-epileptic drug (AED) polytherapy (2 AEDs: OR 1.69 CI: 1.58–1.79; 3 AEDs: OR: 2.23 CI: 2.01–2.48; 4+ AEDs: OR: 2.94 CI: 2.50–3.46), status epilepticus (OR: 2.62 CI: 1.54–4.45), depression (OR: 1.67 CI: 1.57–1.77) and injuries (OR: 1.40 CI: 1.30–1.51). No seizures in the prior year (OR: 0.77 CI: 0.70–0.86) and an increased frequency of collecting repeat epilepsy prescriptions (OR: 0.57 CI: 0.51–0.64) was associated with a lower risk of mortality.

### Conclusion

Our results add to existing evidence that deaths in epilepsy are increasing. Future studies could focus on identifying PWE at high risk during routine consultations and addressing them with clinical interventions or better self-management. Identifying risk factors for younger people should be a priority as epilepsy may be a factor in close to half of deaths of PWE under 35 years of age.

**STRENGTHS AND LIMITATIONS OF THE STUDY**

- The study examines the higher mortality rate in epilepsy by exploring risk factors that could be mitigated by interventions in clinical practice
- The study included data collected in primary care which is large and representative compared to hospital data
- The large sample size collected from participating UK practices contributes to the generalisability of the results
- The data set used was from 2004 to 2014, as this covered a period where epilepsy was part of a national programme for outcome reporting.

For peer review only

## INTRODUCTION

Epilepsy is one of the most common neurological conditions with about 50 million people affected worldwide.<sup>1</sup> With access to good treatment, it is estimated that 60-70% of people with epilepsy (PWE) can become free of seizure.<sup>2</sup> However, epilepsy is also an important cause of premature death.<sup>3</sup> Mortality rates of people with epilepsy are higher than for the general population.<sup>4-9</sup> A longitudinal cohort study from Sweden found that an epilepsy diagnosis was associated with a 14-fold increased risk of all-cause death.<sup>5</sup> Some studies suggest that this has not changed over time.<sup>4 10</sup> Other data suggest the number of deaths in PWE is increasing despite a decrease in all-cause mortality in the general population.<sup>8 11 12</sup> Public Health England reported that deaths with epilepsy as a contributing factor increased by 70% between 2001 and 2014, while all-cause deaths in the population decreased by 6%.<sup>11</sup>

Some causes of death in PWE are similar to the general population, such as circulatory and respiratory diseases, dementia, Alzheimer's and cancers.<sup>11 13 14</sup> Others are related to consequences of the condition itself such as injuries, burns and drowning during seizures.<sup>5 9 15</sup> Lifestyle and psychosocial factors contribute to increased risk of mortality and include alcohol or substance misuse,<sup>13 16</sup> low adherence to medication,<sup>10</sup> depression,<sup>5 16</sup> and socioeconomic status.<sup>11 16</sup> Sudden unexpected death in epilepsy (SUDEP) is sometimes posited as a common cause of death for PWE. A recent review suggests SUDEP accounts for 12% of all-cause deaths in epilepsy.<sup>10</sup> However, factors that can be prevented or treated are under-researched and could lead to more impact on reducing mortality.

In 2011, our group published risk factors increasing mortality in PWE based on population data collected in primary care in the United Kingdom (UK) between 1993 and 2007.<sup>16</sup> Here, we follow-up on the analysis using data collected during an incentivised programme which rewarded enhanced monitoring and care for people with epilepsy in primary care over ten years. We hypothesised that the epilepsy data collected under this programme would be of high quality allowing for a comprehensive analysis of causes and risk factors associated with mortality. We report the number of deaths recorded during this time, the causes of death for younger and older PWE, and risk factors associated with mortality among PWE.

## METHODS

### Study Design

A retrospective cohort design was used to analyse mortality and causes of death in PWE. Risk factors affecting mortality were analysed using a nested case-control study. This study was approved by the Independent Scientific Advisory Committee of the Medicine and Healthcare Regulatory Agency (protocol 17\_208R2).

### Setting

Data was obtained from the Clinical Practice Research Datalink (CPRD). This database contains anonymised patient data obtained from electronic records from primary care clinics in the UK. The data is sent from participating clinics to a central server where data is cleaned, checked for quality and curated. A study from 2015 counted 11,299,221 patients registered in the CPRD from 674 GP practices.<sup>17</sup> Patients in the database were representative of the UK population when compared to the 2011 census.<sup>17</sup> For our study period, mid-year counts for 2004 show 4,584,065 patients were active in the database (alive and currently registered in a GP practice) with 50.1% being female. In 2013, 4,493,034 patients were active at mid-year and 50.4% were female.

1  
2  
3  
4  
5 Cause of death information was obtained when available through linked data for a subset of patients  
6 from England and Wales from the Office of National Statistics (ONS). The cause of death is presented  
7 using ICD-10 diagnostic codes and offers the main cause and up to 15 contributing causes, if  
8 applicable. The Index of Multiple Deprivation (IMD) was also obtained for each patient's GP practice,  
9 which was used for control matching in the case-control study. Practice IMD data was "most up to  
10 date" version when requested in 2018.  
11  
12

13 Our study period was from 01/04/2004 to 31/03/2014 during which epilepsy came under the Quality  
14 and Outcomes Framework, a programme implemented within the primary care setting. The aim of the  
15 programme was to record clinical information on specific lifestyle items or health conditions with the  
16 view that structured monitoring and reporting improved the quality of care.<sup>18</sup>  
17

### 18 **Cohort study participants**

19  
20 For the mortality and cause of death cohort study, adults with epilepsy were included who were least  
21 18 years old at time of death. Epilepsy was defined as having a documented epilepsy diagnostic code  
22 and at least two prescriptions of antiepileptic drugs (AEDs). Any patient with a diagnostic code of  
23 "epilepsy resolved" was removed from the study (Medcodes 8385 and 12848).  
24  
25

### 26 **Case-control study participants**

27  
28 For the analysis of factors associated with mortality, cases were defined as PWE with a documented  
29 date of death between 01/04/2004 to 31/03/2014 with at least 12 months of data recorded in our  
30 study period (thus earliest data of death included was 01/04/2005). Controls were randomly matched  
31 at a ratio of 3:1 by sex, practice IMD, year of birth (+/- 1 year). For cases aged 18, controls were  
32 matched for year of birth + 1 year. Controls were alive for at least 12 months after the date of death  
33 of their matched case.  
34

### 35 **Exposure variables**

36  
37 Potential variables were selected based on existing literature, items part of the QOF and others  
38 associated with lifestyle. Exposure data were refined based on the availability and reliability of data in  
39 the CPRD. Description of variables and sources of data are included in the Supplemental File. We  
40 assessed variables occurring in the 12 months prior to the case's date of death for emergency  
41 department visits or emergency admissions, number of AEDs, status epilepticus, depression, injury,  
42 smoking status, seizure freedom, and prescription adherence. Prescription adherence for 12 months  
43 was established using Therapy data which records dates of repeat prescriptions as requested by GPs.  
44 History of co-morbidity was taken from all available patient data for dementia and stroke. Missing  
45 data was considered as "no" for binary outcomes except for smoking status where the last known  
46 status was used, as previously reported.<sup>19</sup> Variables that were considered but not included due to poor  
47 quality of data included alcohol and substance use.  
48  
49

### 50 **Statistics**

51  
52 The number all-cause deaths recorded in the CPRD was calculated for complete calendar years (from  
53 2005 to 2013) to allow for comparisons with previous publications. All other analyses used data from  
54 the full study period (01/04/2004 to 31/03/2014). The cause of death data was analysed two ways: 1)  
55 tabulating the main cause of death in PWE and 2) evaluating the proportion of deaths with epilepsy  
56 listed as a contributing cause. A contributing cause was defined as either the main cause or listed as a  
57 cause in any of the other 15 positions on the death certificate. The main causes of death are presented  
58  
59  
60



for younger and older PWE with 65 years as the cut-off. Deaths with epilepsy as a contributing cause were divided by age group. To track trends, an additional analysis of main cause of death by full calendar year is presented in supplemental material.

Conditional logistic regression was used for the nested case-control study. Variables were included in the model following maximum likelihood and Akaike information criterion (AIC) testing. Potential confounders such as age, sex, and deprivation were addressed by control matching. Data are presented as odds ratios (ORs) and 95% confidence intervals.

### Patient and Public Involvement

No patient involved.

## RESULTS

We obtained a sample size of 70,431 PWE with 11,241 who had a documented date of death within our time frame (Figure 1). We obtained cause of death for 7,405 people from ONS linked data. Age of patients ranged 18 to 105 with 50.8% male.

### Number of deaths

The number of deaths recorded in the database increased between 2005 to 2013, from 821 to 1,386 which represents a 68.8% increase (Table 1). This increase was not attributed to more PWE being registered in the database as this decreased by 21.8% over the same period. The mean age of the participants within the database increased over time.

**Table 1.** Number of recorded deaths of PWE in the CPRD per full year within the study period.

|                                                            | 2005           | 2006           | 2007           | 2008           | 2009           | 2010           | 2011           | 2012           | 2013           |
|------------------------------------------------------------|----------------|----------------|----------------|----------------|----------------|----------------|----------------|----------------|----------------|
| <b>Average age of adult PWE in the database, mean (SD)</b> | 48.7<br>(18.5) | 49.0<br>(18.6) | 49.3<br>(18.6) | 49.6<br>(18.6) | 49.9<br>(18.6) | 50.2<br>(18.6) | 50.5<br>(18.6) | 50.8<br>(18.6) | 51.2<br>(18.6) |
| <b>Number of PWE registered in the database</b>            | 48,447         | 48,585         | 48,031         | 46,948         | 45,941         | 44,485         | 42,521         | 40,120         | 37,865         |
| <b>Number of recorded deaths</b>                           | 821            | 1,075          | 1,190          | 1,241          | 1,214          | 1,307          | 1,282          | 1,386          | 1,386          |
| <b>Number of deaths per 1000 PWE in the CPRD</b>           | 16.9           | 22.1           | 24.8           | 26.4           | 26.4           | 29.4           | 30.1           | 34.5           | 36.6           |

Note: PWE defined as having an epilepsy diagnostic code and at least two prescriptions of AEDs, aged >17. Study period was from 1<sup>st</sup> April 2004 to 31<sup>st</sup> March 2014. Only data from full calendar years within that time frame were used for this table.

### Cause of death

The main causes of death for PWE aged 18 to 64 years old were neoplasms (26.8%), diseases of the circulatory system (15.4%) and epilepsy (14.2%) (Table 2a). For PWE 65 years and over, the main

causes of death were diseases of the circulatory system (37.3%), neoplasms (17.2%) and diseases of the respiratory system (15.6%) (Table 2b). Deaths due to epilepsy as a primary cause were documented in 2.7% of older PWE.

**Table 2a.** Documented main cause of death of people with epilepsy under 65 years

| ICD-10 category                                                                                   | Under 65, n (%)      |
|---------------------------------------------------------------------------------------------------|----------------------|
| Neoplasms (C00-D48)                                                                               | 571(26.9)            |
| Diseases of the circulatory system (I00-I99)                                                      | 330 (15.6)           |
| Epilepsy (G40-G41)                                                                                | 302 (14.2)           |
| Diseases of the respiratory system (J00-J99)                                                      | 176 (8.3)            |
| Diseases of the nervous system (G00-G37, G43-G99), excluding epilepsy                             | 164 (7.7)            |
| Diseases of the digestive system (K00-KK93)                                                       | 161 (7.6)            |
| External causes of morbidity and mortality (V01-X59, X85-Y98)                                     | 129 (6.1)            |
| Congenital malformations, deformations and chromosomal abnormalities (Q00-Q99)                    | 70 (3.3)             |
| Mental and behavioural disorders (F00-F99)                                                        | 61 (2.9)             |
| Endocrine, nutritional and metabolic diseases (E00-E90)                                           | 34 (1.6)             |
| Symptoms, signs and abnormal clinical and laboratory findings, not elsewhere classified (R00-R99) | 29 (1.4)             |
| External causes of morbidity and mortality (intentional) (X60-X84)                                | 28 (1.3)             |
| Diseases of the genitourinary system (N00-N99)                                                    | 23 (1.1)             |
| Certain infectious and parasitic diseases (A00-B99)                                               | 20 (0.9)             |
| Diseases of the blood and blood-forming organs (D50-D89)                                          | 9 (0.4)              |
| Diseases of the musculoskeletal system and connective tissue (M00-M99)                            | 9 (0.4)              |
| Diseases of the skin and subcutaneous tissue (L00-L99)                                            | 4 (0.2)              |
| <b>Total</b>                                                                                      | <b>2,120 (100.0)</b> |

**Table 2b.** Documented main cause of death of people with epilepsy aged 65 and over

| ICD-10 category                                                                                   | 65 and over, n (%)   |
|---------------------------------------------------------------------------------------------------|----------------------|
| Diseases of the circulatory system (I00-I99)                                                      | 1973 (37.3)          |
| Neoplasms (C00-D48)                                                                               | 910 (17.2)           |
| Diseases of the respiratory system (J00-J99)                                                      | 827 (15.6)           |
| Mental and behavioural disorders (F00-F99)                                                        | 479 (9.1)            |
| Diseases of the nervous system (G00-G37, G43-G99), excluding epilepsy                             | 295 (5.6)            |
| Diseases of the digestive system (K00-KK93)                                                       | 173 (3.3)            |
| Epilepsy (G40-G41)                                                                                | 142 (2.7)            |
| Diseases of the genitourinary system (N00-N99)                                                    | 130 (2.5)            |
| External causes of morbidity and mortality (V01-X59, X85-Y98)                                     | 88 (1.7)             |
| Symptoms, signs and abnormal clinical and laboratory findings, not elsewhere classified (R00-R99) | 86 (1.6)             |
| Endocrine, nutritional and metabolic diseases (E00-E90)                                           | 67 (1.3)             |
| Certain infectious and parasitic diseases (A00-B99)                                               | 46 (0.9)             |
| Diseases of the musculoskeletal system and connective tissue (M00-M99)                            | 29 (0.5)             |
| Congenital malformations, deformations and chromosomal abnormalities (Q00-Q99)                    | 15 (0.3)             |
| Diseases of the skin and subcutaneous tissue (L00-L99)                                            | 13 (0.2)             |
| Diseases of the blood and blood-forming organs (D50-D89)                                          | 8 (0.2)              |
| External causes of morbidity and mortality (intentional) (X60-X84)                                | 4 (0.1)              |
| <b>Total</b>                                                                                      | <b>5,285 (100.0)</b> |

We tabulated the number of deaths with epilepsy listed as a cause of death, either the main or a contributing cause (Table 3). In PWE under 35, almost 45% of deaths had epilepsy as a contributory cause (35.1% to 53.3%, with a mean of 44.2%) (Table 3). The trends are similar between sexes under 35 and over 65. However, they differ in middle-age. At age 40, epilepsy-contributing deaths were 2-fold higher in male compared to female PWE.

**Table 3.** Epilepsy documented as a contributing cause of death by age group

| Age group | Male                |                                                   | Female              |                                                   |
|-----------|---------------------|---------------------------------------------------|---------------------|---------------------------------------------------|
|           | All cause deaths, n | Deaths with epilepsy as contributing cause, n (%) | All cause deaths, n | Deaths with epilepsy as contributing cause, n (%) |
| 18-19     | 15                  | 8 (53.3)                                          | 8                   | 3 (37.5)                                          |
| 20-24     | 37                  | 17 (45.9)                                         | 29                  | 13 (44.8)                                         |
| 25-29     | 45                  | 22 (48.9)                                         | 37                  | 17 (45.9)                                         |
| 30-34     | 64                  | 27 (42.2)                                         | 37                  | 13 (35.1)                                         |
| 35-39     | 81                  | 19 (23.5)                                         | 62                  | 17 (27.4)                                         |
| 40-44     | 135                 | 44 (32.6)                                         | 75                  | 12 (16.0)                                         |
| 45-49     | 157                 | 42 (26.8)                                         | 104                 | 18 (17.3)                                         |
| 50-54     | 213                 | 58 (27.2)                                         | 114                 | 19 (16.7)                                         |
| 55-59     | 238                 | 44 (18.5)                                         | 165                 | 23 (13.9)                                         |
| 60-64     | 291                 | 63 (21.6)                                         | 213                 | 36 (16.9)                                         |
| 65-69     | 323                 | 42 (13.0)                                         | 266                 | 38 (14.3)                                         |
| 70-74     | 442                 | 60 (13.6)                                         | 295                 | 34 (11.5)                                         |
| 75-79     | 475                 | 44 (9.3)                                          | 444                 | 57 (12.8)                                         |
| 80-84     | 517                 | 53 (10.3)                                         | 578                 | 68 (11.8)                                         |
| 85-89     | 485                 | 54 (11.1)                                         | 623                 | 62 (10.0)                                         |
| 90-105    | 290                 | 22 (7.6)                                          | 547                 | 65 (11.9)                                         |

To explore whether there were changes in the causes of death over time, we tabulated the main cause of death by year (Supplementary File Table S1). Diseases of the circulatory system were consistently listed as the highest main cause of death for each year. The proportion of deaths due to mental and behavioural disorders doubled from 2011 onwards (mean percentage for 2005 to 2010: 5.05%, mean percentage for 2011 to 2013: 10.7%). The proportion of deaths attributed to epilepsy as the primary cause remained relatively stable throughout (6.3% for 2005 to 5.2% for 2013), although the number of deaths this represented increased (33 in 2005 to 51 to 2013).

### Risk factors

Risk factors included in the model, frequencies and associated ORs are presented in Table 4. Attendance at emergency departments in the previous 12 months was associated with the highest risk (OR: 3.06 CI: 2.83 – 3.31). Compared to being prescribed one AED, prescription of two or more AEDs was associated with an elevated risk of death (2 AEDs: OR 1.69 CI: 1.58 – 1.79; 3 AEDs: OR: 2.23 CI: 2.01 – 2.48; 4+ AEDs: OR: 2.94 CI: 2.50 – 3.46), while no AED prescription was associated with a lower risk (OR: 0.36 CI: 0.31 – 0.42) (Table 4). Other factors associated with an increased risk of mortality included experiencing status epilepticus within the past 12 months (OR: 2.62 CI: 1.54 – 4.45),

depression (OR: 1.67 CI: 1.57 – 1.77), smoking (OR: 1.43 CI: 1.32 – 1.54), injury (OR: 1.40 CI: 1.30 – 1.51), and history of dementia (OR: 1.37 CI: 1.25 – 1.51) and stroke (OR: 1.37 CI: 1.25 – 1.49).

A lower risk of death was associated with seizure freedom in the previous 12 months (OR: 0.77 CI: 0.70 – 0.86) and a higher prescription adherence (75 to 100% adherence: OR 0.57 CI: 0.51 – 0.64).

**Table 4.** Risk factors Increasing mortality in PWE

| Factor                                            | Group        | Controls |      | Cases |      | Odds Ratio | 95% Confidence interval |
|---------------------------------------------------|--------------|----------|------|-------|------|------------|-------------------------|
|                                                   |              | n        | %    | n     | %    |            |                         |
| Emergency department visit or emergency admission | no           | 25,712   | 94.2 | 7,469 | 82.1 | reference  |                         |
|                                                   | yes          | 1,576    | 5.8  | 1,627 | 17.9 | 3.06       | 2.83 - 3.31             |
| Number of AEDs prescribed                         | 0            | 1,667    | 6.1  | 353   | 3.9  | 0.36       | 0.31 - 0.42             |
|                                                   | 1            | 18,768   | 68.8 | 5,233 | 57.5 | reference  |                         |
|                                                   | 2            | 5,196    | 19.0 | 2,453 | 27.0 | 1.69       | 1.58 - 1.79             |
|                                                   | 3            | 1,231    | 4.5  | 732   | 8.0  | 2.23       | 2.01 - 2.48             |
|                                                   | 4+           | 426      | 1.6  | 325   | 3.6  | 2.94       | 2.50 - 3.46             |
| Status epilepticus                                | no           | 27,261   | 99.9 | 9,060 | 99.6 | reference  |                         |
|                                                   | yes          | 27       | 0.1  | 36    | 0.4  | 2.62       | 1.54 - 4.45             |
| Depression                                        | no           | 21,790   | 79.9 | 6,158 | 67.7 | reference  |                         |
|                                                   | yes          | 5,498    | 20.1 | 2,938 | 32.3 | 1.67       | 1.57 - 1.77             |
| Smoking status                                    | Non-smoker   | 23,904   | 87.6 | 7,579 | 83.3 | reference  |                         |
|                                                   | Smoker       | 3,384    | 12.4 | 1,517 | 16.7 | 1.43       | 1.32 - 1.54             |
| Injury                                            | no           | 24,347   | 89.2 | 7,579 | 83.3 | reference  |                         |
|                                                   | yes          | 2,941    | 10.8 | 1,517 | 16.7 | 1.40       | 1.30 - 1.51             |
| Dementia                                          | no           | 25,698   | 94.2 | 8,328 | 91.6 | reference  |                         |
|                                                   | yes          | 1,590    | 5.8  | 768   | 8.4  | 1.37       | 1.25 - 1.51             |
| Stroke                                            | no           | 21,699   | 79.5 | 6,960 | 76.5 | reference  |                         |
|                                                   | yes          | 5,589    | 20.5 | 2,136 | 23.5 | 1.37       | 1.25 - 1.49             |
| Age                                               |              |          |      |       |      | 1.15       | 1.11 - 1.19             |
| Prescription adherence                            | 0 to 25%     | 2,702    | 9.9  | 903   | 9.9  | reference  |                         |
|                                                   | >25% to 50%  | 872      | 3.2  | 549   | 6.0  | 1.13       | 0.96 – 1.32             |
|                                                   | >50% to 75%  | 2,814    | 10.3 | 1,177 | 12.9 | 0.83       | 0.73 – 0.95             |
|                                                   | >75% to 100% | 20,900   | 76.6 | 6,467 | 71.1 | 0.57       | 0.51 – 0.64             |
| Seizure-free in previous 12 months                | no           | 25,180   | 92.3 | 8,611 | 94.7 | reference  |                         |
|                                                   | yes          | 2,108    | 7.7  | 485   | 5.3  | 0.77       | 0.70 - 0.86             |

## DISCUSSION

We examined the causes of death among PWE and risk factors associated with mortality in a group of PWE derived from primary care data. The number of PWE with recorded deaths increased throughout our 9-year study period while the deaths attributed to epilepsy remained stable. In our model, we found important factors associated with a higher risk of mortality, some of which could be identified and potentially ameliorated by step-up care.

1  
2  
3 There were differences in the proportion of deaths attributed to epilepsy between younger and older  
4 PWE. Studies have found deaths of younger PWE are more often attributed to epilepsy.<sup>20 21</sup> Indeed,  
5 epilepsy was the third highest main cause of death in younger PWE in our study, accounting for almost  
6 15% of deaths. This increased to 35-50% when evaluating all contributing causes in age groups under  
7 35. As younger PWE tend to have less co-morbidity than older adults, it may be simpler to attribute  
8 epilepsy as the main cause of death. New diagnoses of epilepsy in people over 65 are often secondary  
9 to cerebrovascular disease such as stroke or neoplasms in the brain.<sup>22</sup> In our study, dementia was  
10 found to increase the risk of death, which has been found to share biological links with epilepsy.<sup>23</sup> New  
11 onset epilepsy in older people tends to be better controlled with AEDs.<sup>24</sup> Thus, other co-morbidity  
12 may take precedence in older PWE when documenting the cause of death, as epilepsy contributed to  
13 only about 10% of deaths and was listed as a main cause in 3%.

### 17 **Factors associated with increased risk of death**

19 Our findings support evidence from previous studies. Factors associated with risk of mortality in  
20 epilepsy included: depression,<sup>5 16 25</sup> injuries,<sup>3 5 9 16 26</sup> dementia and stroke,<sup>13 27</sup> age,<sup>13</sup> prescription  
21 adherence,<sup>16 28 29</sup> and seizure freedom.<sup>3 13 15 16</sup> Novel findings include increased risk associated with  
22 emergency department visits and/or emergency admissions, prescription of more than one AED, and  
23 status epilepticus. Status epilepticus is a known cause of death,<sup>13 21 30</sup> however, to our knowledge, it  
24 has not been included within a risk model before.

### 27 **Clinical Implications**

#### 29 **Epilepsy management**

31 The need for better epilepsy management is at the core of our findings. Several risk factors are linked  
32 within this theme such as emergency department attendance, polypharmacy, injury, adherence, and  
33 seizure freedom.

35 Visits to emergency departments or emergency admissions were associated with a 3-fold increased  
36 risk of death, the highest risk in our model. Visits to emergency services are associated with having  
37 injuries,<sup>29</sup> experiencing a seizure or a change in normal seizure presentation,<sup>31</sup> and having less  
38 confidence in self-management.<sup>32</sup> Attendance to emergency departments for epilepsy could thus be  
39 considered a surrogate marker for poor epilepsy management.<sup>33</sup> The National Audit of Seizure  
40 management in Hospitals (NASH), conducted during our study period in 2011 and 2013, found 63% of  
41 PWE presenting to emergency departments for seizures had not been seen by a specialist in the  
42 previous year.<sup>34</sup> Moreover only half of attendees were either seen by a neurologist on site or referred  
43 to one upon discharge.<sup>34</sup> These are missed opportunities to follow-up with patients who may be in  
44 need of clinical review or help with self-management, putting them at greater risk of death.

#### 47 **Areas for possible intervention**

49 Regular medication review for multiple AEDs may be important as increased mortality risk was  
50 associated with two or more AEDs. Prescriptions of multiple AEDs may be an effect of having more  
51 refractory and harder to control epilepsy. However, polypharmacy may also result in more side-effects  
52 and different treatment schedules which could lead to more problems with medication adherence.<sup>35</sup>

55 Adherence to medication treatment was found to be associated with fewer emergency department  
56 admissions, injuries, and lower costs.<sup>28 29</sup> In our study, higher rates of AED prescription collection was  
57 associated with a lower risk of death. However, the data we used had no granular information on  
58 medication adherence, or how medication was taken, only regular prescription collection. Collecting  
59 prescribed medicines requires a certain level of engagement and may be higher in those with better  
60

1  
2  
3 self-management. Up to 50% of PWE can be non-adherent to treatment for various reasons,<sup>29</sup>  
4 intentional or unintentional, with memory issues, side-effects and poor communication between  
5 patients and clinicians being factors.<sup>36 37</sup> In the UK, medication for epilepsy is free and thus financial  
6 reasons would not be a factor for our study. However, availability of free medication can depend on  
7 adequate drug supply from manufacturers and having access to pharmacies. Annual medication  
8 reviews were part of the QOF programme for epilepsy within our study time frame. This may have  
9 improved prescription adherence, in other words collection of prescribed AEDs, which was high in our  
10 study. Discussing issues around adherence help elucidate barriers to better self-management.

11  
12  
13 Depression has been reported in about 25% of PWE.<sup>38 39</sup> In our study, we found 30% of cases and 20%  
14 of controls had either a diagnosis of depression or a prescription of anti-depressants. Depression and  
15 other psychiatric disorders have been found to be associated with worse quality of life<sup>40</sup> and affect  
16 self-management.<sup>41</sup> Many PWE have said they do not feel their mental health needs are being  
17 addressed and thus depression may be underassessed in this patient group.<sup>42</sup> As the proportion of  
18 deaths with psychiatric illness as a main cause increased 2-fold in our study period, psychiatric  
19 assessment and management should be provided for people with epilepsy.

20  
21  
22 Ultimately, the goal of better epilepsy management is seizure reduction or seizure freedom. Seizure  
23 freedom was associated with a 20% reduced risk of mortality in our model. Previous findings showed  
24 seizure freedom conveyed similar mortality rates as observed in the general population.<sup>15</sup>

#### 25 26 27 Other factors

28  
29 We explored lifestyle factors which may be associated with increased mortality and found smoking to  
30 be associated with a higher risk. Other findings may be less amenable to change, although some  
31 intervention may be helpful. For example, experiencing status epilepticus in the previous 12 months  
32 was associated with a higher risk of death. In epilepsy, it is most often caused by low blood levels of  
33 AEDs or alcohol misuse.<sup>43</sup> Injury to the brain (trauma, hypoxia, anoxia), tumours, infections and stroke  
34 can also trigger status epilepticus and thus it may not always be preventable.<sup>43</sup>

#### 35 36 37 **Strengths and limitations**

38  
39 The CPRD contains data collected from primary care which is vast and increased the generalisability  
40 of results as all participating UK practices were included. The quality of information in the CPRD is  
41 dependent on data entered by practice staff during consultations. Items not applicable for a patient  
42 may be left off, rather than recorded as such. In the case of diagnosis, there is no option for a GP to  
43 enter an absence of diagnosis. For this reason, we interpreted missing data as “no” or “no  
44 complication”, however we recognise this may be a limitation for some factors. Other limitations  
45 include not knowing the cause of injuries or hospital attendance and thus they may be unrelated to  
46 epilepsy.

47  
48  
49 The time frame of our analysis corresponded to the period where epilepsy was part of the Quality and  
50 Outcomes Framework, a programme whereby GPs were contracted to record specific characteristics  
51 of their patients with epilepsy.<sup>44</sup> In particular, data on drug treatment, seizure frequency and seizure  
52 freedom were part of this programme.<sup>44</sup> We hypothesized that this would lead to better quality data  
53 for epilepsy and strengthen the study. While the data collected may be more complete than years  
54 prior, GP practices were less successful in achieving targets for epilepsy compared to other conditions,  
55 some of which are more highly rewarded.<sup>44 45</sup> Older data may contain outdated diagnoses of epilepsy  
56 which may not have been reconfirmed by today’s standards, and if in remission, might not have been  
57 designated with an epilepsy resolved code. This could lead to missing epilepsy data. However, the  
58  
59  
60



1  
2  
3 strength of the CRPD is the vast data collected from the community setting compared to hospital  
4 databases.  
5

6 Death certificate data for epilepsy has often been found to be problematic. A 2002 audit of UK data  
7 found up to 40% of deaths were attributed to the wrong cause for PWE.<sup>46</sup> Epilepsy tends to be  
8 underestimated as a cause of death<sup>8 25</sup> and dismissed for other cardiovascular or respiratory  
9 explanations.<sup>20 25 47</sup> Indeed, we found other diseases were listed as primary cause of death which may  
10 in fact have been epilepsy. The percentage of deaths with epilepsy as a main cause remained stable  
11 throughout our study, suggesting that practice may not have changed during this time.  
12  
13

### 14 **Research Implications**

15  
16 Our risk factor model took into account PWE of all ages. However, as the main causes of death differ  
17 between younger and older PWE, risk factors may also be different. Indeed, the highest excess  
18 mortality due to epilepsy has been observed in younger people.<sup>15</sup> This would benefit from further  
19 research, particularly as epilepsy contributed to close to 50% of deaths in some younger age groups.  
20 We also did not evaluate potential causes of epilepsy, such as whether stroke or tumours preceded  
21 an epilepsy diagnosis, and whether this would impact mortality. In addition, the analysis may benefit  
22 from being repeated with more recent data from the CPRD and ONS.  
23  
24  
25

### 26 **CONCLUSION**

27  
28 Several reports, including ours, have shown deaths in epilepsy continue to rise. Epilepsy is deemed a  
29 contributing cause of death particularly in young PWE, but less so in those over 65. While epilepsy in  
30 older people may be better controlled with AEDs, co-morbidity may mask the impact of epilepsy. We  
31 found certain factors are associated with risk of death such as emergency department attendance for  
32 epilepsy and admission, AED polytherapy, depression, injuries, and prescription non-adherence. These  
33 could be addressed with clinical intervention and more information for self-management.  
34  
35  
36  
37

### 38 **FUNDING**

39 This work was partly funded by SUDEP Action (award number not applicable).  
40  
41  
42  
43

### 44 **AUTHOR CONTRIBUTIONS**

45  
46 GW conducted the study, statistical analysis, and write-up of manuscript. MG contributed to the  
47 study design, supported the statistical analysis, and write-up. MA contributed to the study design  
48 and write-up. MPR contributed to study design. LR contributed to the study design, interpretation,  
49 and write-up of findings.  
50  
51  
52  
53  
54  
55  
56  
57  
58  
59  
60

## References

1. World Health Organization. Epilepsy 2019 [updated 20/06/2019. Available from: <https://www.who.int/news-room/fact-sheets/detail/epilepsy> accessed 26/11/2020.
2. Duncan JS, Sander JW, Sisodiya SM, et al. Adult epilepsy. *Lancet* 2006;367(9516):1087-100. doi: <http://dx.doi.org/10.1016/S0140-6736%2806%2968477-8>
3. Thurman DJ, Logroscino G, Beghi E, et al. The burden of premature mortality of epilepsy in high-income countries: A systematic review from the Mortality Task Force of the International League Against Epilepsy. *Epilepsia* 2017;58(1):17-26. doi: <https://doi.org/10.1111/epi.13604>
4. Neligan A, Bell GS, Shorvon SD, et al. Temporal trends in the mortality of people with epilepsy: a review. *Epilepsia* 2010;51(11):2241-6. doi: 10.1111/j.1528-1167.2010.02711.x
5. Fazel S, Wolf A, Langstrom N, et al. Premature mortality in epilepsy and the role of psychiatric comorbidity: a total population study. *Lancet* 2013;382(9905):1646-54. doi: 10.1016/S0140-6736(13)60899-5
6. Quintana M, Sánchez-López J, Mazuela G, et al. Incidence and mortality in adults with epilepsy in northern Spain. *Acta Neurologica Scandinavica*;n/a(n/a) doi: <https://doi.org/10.1111/ane.13349> [published Online First: 24/09/2020]
7. Trinka E, Bauer G, Oberaigner W, et al. Cause-specific mortality among patients with epilepsy: results from a 30-year cohort study. *Epilepsia* 2013;54(3):495-501. doi: 10.1111/epi.12014 [published Online First: 2012/11/22]
8. DeGiorgio CM, Curtis A, Carapetian A, et al. Why are epilepsy mortality rates rising in the United States? A population-based multiple cause-of-death study. *BMJ Open* 2020;10(8):e035767. doi: 10.1136/bmjopen-2019-035767
9. Nilsson L, Tomson T, Farahmand BY, et al. Cause-specific mortality in epilepsy: a cohort study of more than 9,000 patients once hospitalized for epilepsy. *Epilepsia* 1997;38(10):1062-8. doi: 10.1111/j.1528-1157.1997.tb01194.x
10. Mbizvo GK, Bennett K, Simpson CR, et al. Epilepsy-related and other causes of mortality in people with epilepsy: A systematic review of systematic reviews. *Epilepsy Res* 2019;157:106192. doi: 10.1016/j.eplepsyres.2019.106192
11. Public Health England. Deaths Associated with Neurological Conditions in England, 2001 to 2014. London, UK: Public Health England, 2018.
12. Greenlund SF, Croft JB, Kobau R. Epilepsy by the Numbers: Epilepsy deaths by age, race/ethnicity, and gender in the United States significantly increased from 2005 to 2014. *Epilepsy Behav* 2017;69:28-30. doi: 10.1016/j.yebeh.2017.01.016
13. Keezer MR, Bell GS, Neligan A, et al. Cause of death and predictors of mortality in a community-based cohort of people with epilepsy. *Neurology* 2016;86(8):704-12. doi: 10.1212/WNL.0000000000002390
14. Morgan CL, Kerr MP. Epilepsy and mortality: a record linkage study in a U.K. population. *Epilepsia* 2002;43(10):1251-5. doi: 10.1046/j.1528-1157.2002.38701.x
15. Mohanraj R, Norrie J, Stephen LJ, et al. Mortality in adults with newly diagnosed and chronic epilepsy: a retrospective comparative study. *Lancet Neurology* 2006;5(6):481-87. doi: 10.1016/s1474-4422(06)70448-3
16. Ridsdale L, Charlton J, Ashworth M, et al. Epilepsy mortality and risk factors for death in epilepsy: a population-based study. *Br J Gen Pract* 2011;61(586):e271-8. doi: 10.3399/bjgp11X572463
17. Herrett E, Gallagher AM, Bhaskaran K, et al. Data Resource Profile: Clinical Practice Research Datalink (CPRD). *International Journal of Epidemiology* 2015;44(3):827-36. doi: 10.1093/ije/dyv098
18. The Health and Social Care Information Centre. QOF 2004/05 background 2012.
19. Booth HP, Prevost AT, Gulliford MC. Validity of smoking prevalence estimates from primary care electronic health records compared with national population survey data for England, 2007 to 2011. *Pharmacoepidemiol Drug Saf* 2013;22(12):1357-61. doi: 10.1002/pds.3537



20. Neligan A, Bell GS, Johnson AL, et al. The long-term risk of premature mortality in people with epilepsy. *Brain* 2011;134(Pt 2):388-95. doi: 10.1093/brain/awq378
21. Lhatoo SD, Johnson AL, Goodridge DM, et al. Mortality in epilepsy in the first 11 to 14 years after diagnosis: multivariate analysis of a long-term, prospective, population-based cohort. *Ann Neurol* 2001;49(3):336-44. [published Online First: 2001/03/23]
22. Sen A, Jette N, Husain M, et al. Epilepsy in older people. *Lancet* 2020;395(10225):735-48. doi: 10.1016/S0140-6736(19)33064-8
23. Sen A, Capelli V, Husain M. Cognition and dementia in older patients with epilepsy. *Brain* 2018;141(6):1592-608. doi: <http://dx.doi.org/10.1093/brain/awy022>
24. Johnston A, Smith P. Epilepsy in the older patient. *Reviews in Clinical Gerontology* 2007;17(2):109-18. doi: <http://dx.doi.org/10.1017/S0959259808002414>
25. Devinsky O, Hesdorffer DC, Thurman DJ, et al. Sudden unexpected death in epilepsy: epidemiology, mechanisms, and prevention. *Lancet Neurology* 2016;15(10):1075-88.
26. Rafnsson V, Olafsson E, Hauser WA, et al. Cause-specific mortality in adults with unprovoked seizures - A population-based incidence cohort study. *Neuroepidemiology* 2001;20(4):232-36. doi: 10.1159/000054795
27. Blank LJ, Acton EK, Willis AW. Predictors of mortality in older adults with epilepsy: Implications for learning health systems. *Neurology* 2020 doi: 10.1212/WNL.0000000000011079
28. Davis KL, Candrilli SD, Edin HM. Prevalence and cost of nonadherence with antiepileptic drugs in an adult managed care population. *Epilepsia* 2008;49(3):446-54. doi: 10.1111/j.1528-1167.2007.01414.x
29. Faight E, Duh MS, Weiner JR, et al. Nonadherence to antiepileptic drugs and increased mortality. *Findings from the RANSOM Study* 2008;71(20):1572-78. doi: 10.1212/01.wnl.0000319693.10338.b9
30. Lip GY, Brodie MJ. Sudden death in epilepsy: an avoidable outcome? *J R Soc Med* 1992;85(10):609-11.
31. McKinlay A, Morgan M, Noble A, et al. Patient views on use of emergency and alternative care services for adult epilepsy: A qualitative study. *Seizure* 2020;80:56-62. doi: 10.1016/j.seizure.2020.04.011
32. Noble AJ, Morgan M, Viridi C, et al. A nurse-led self-management intervention for people who attend emergency departments with epilepsy: the patients' view. *J Neurol* 2013;260(4):1022-30. doi: 10.1007/s00415-012-6749-2
33. Shohet C, Yelloly J, Bingham P, et al. The association between the quality of epilepsy management in primary care, general practice population deprivation status and epilepsy-related emergency hospitalisations. *Seizure* 2007;16(4):351-5. doi: 10.1016/j.seizure.2007.02.005
34. Dixon PA, Kirkham JJ, Marson AG, et al. National Audit of Seizure management in Hospitals (NASH): Results of the national audit of adult epilepsy in the UK. *BMJ Open* 2015;5 (3) (no pagination)(e007325) doi: <http://dx.doi.org/10.1136/bmjopen-2014-007325>
35. Wojewodka G, McKinlay A, Ridsdale L. Best care for older people with epilepsy: A scoping review. *Seizure* 2021;85:70-89. doi: 10.1016/j.seizure.2020.12.007 [published Online First: 2021/01/16]
36. Smithson WH, Hukins D, Colwell B, et al. Developing a method to identify medicines non-adherence in a community sample of adults with epilepsy. *Epilepsy Behav* 2012;24(1):49-53. doi: 10.1016/j.yebeh.2012.02.015 [published Online First: 2012/04/13]
37. Banks J, Varley J, Fitzsimons M, et al. Self-reported antiepilepsy medication adherence and its connection to perception of medication error. *Epilepsy Behav* 2020;104(Pt A):106896. doi: 10.1016/j.yebeh.2019.106896 [published Online First: 2020/01/28]
38. Tellez-Zenteno JF, Patten SB, Jetté N, et al. Psychiatric comorbidity in epilepsy: a population-based analysis. *Epilepsia* 2007;48(12):2336-44. doi: 10.1111/j.1528-1167.2007.01222.x [published Online First: 2007/07/31]

- 1  
2  
3 39. Scott AJ, Sharpe L, Hunt C, et al. Anxiety and depressive disorders in people with epilepsy: A  
4 meta-analysis. *Epilepsia* 2017;58(6):973-82. doi: 10.1111/epi.13769  
5  
6 40. Ridsdale L, Wojewodka G, Robinson E, et al. Characteristics associated with quality of life among  
7 people with drug-resistant epilepsy. *Journal of Neurology* 2017;264(6):1174-84. doi:  
8 10.1007/s00415-017-8512-1  
9  
10 41. Dilorio C, Shafer PO, Letz R, et al. Behavioral, social, and affective factors associated with self-  
11 efficacy for self-management among people with epilepsy. *Epilepsy Behav* 2006;9(1):158-63.  
12 doi: 10.1016/j.yebeh.2006.05.001  
13  
14 42. Neurological Alliance. Parity of Esteem. UK, 2017.  
15  
16 43. Trinka E, Hofler J, Zerbs A. Causes of status epilepticus. *Epilepsia* 2012;53 Suppl 4:127-38. doi:  
17 10.1111/j.1528-1167.2012.03622.x  
18  
19 44. Health and Social Care Information Centre. National Quality and Outcomes Framework Statistics  
20 for England 2004/05: Health and Social Care Information Centre, 2005.  
21  
22 45. Prescribing and Primary Care Services HaSCIC. Quality and Outcomes Framework – Prevalence,  
23 Achievements and Exceptions Report. England 2013-2014., 2014.  
24  
25 46. Hanna NJ, Black M, Sander JWS, et al. The National Sentinel Clinical Audit of Epilepsy-Related  
26 Death: Epilepsy – death in the shadows, 2002.  
27  
28 47. Kim AS, Moffatt E, Ursell PC, et al. Sudden neurologic death masquerading as out-of-hospital  
29 sudden cardiac death. *Neurology* 2016;87(16):1669-73. doi:  
30 10.1212/wnl.0000000000003238 [published Online First: 2016/10/19]  
31  
32  
33  
34  
35  
36  
37  
38  
39  
40  
41  
42  
43  
44  
45  
46  
47  
48  
49  
50  
51  
52  
53  
54  
55  
56  
57  
58  
59  
60

1  
2  
3  
4  
5  
6  
7  
8  
9  
10  
11  
12  
13  
14  
15  
16  
17  
18  
19  
20  
21  
22  
23  
24  
25  
26  
27  
28  
29  
30  
31  
32  
33  
34  
35  
36  
37  
38  
39  
40  
41  
42  
43  
44  
45  
46  
47  
48  
49  
50  
51  
52  
53  
54  
55  
56  
57  
58  
59  
60

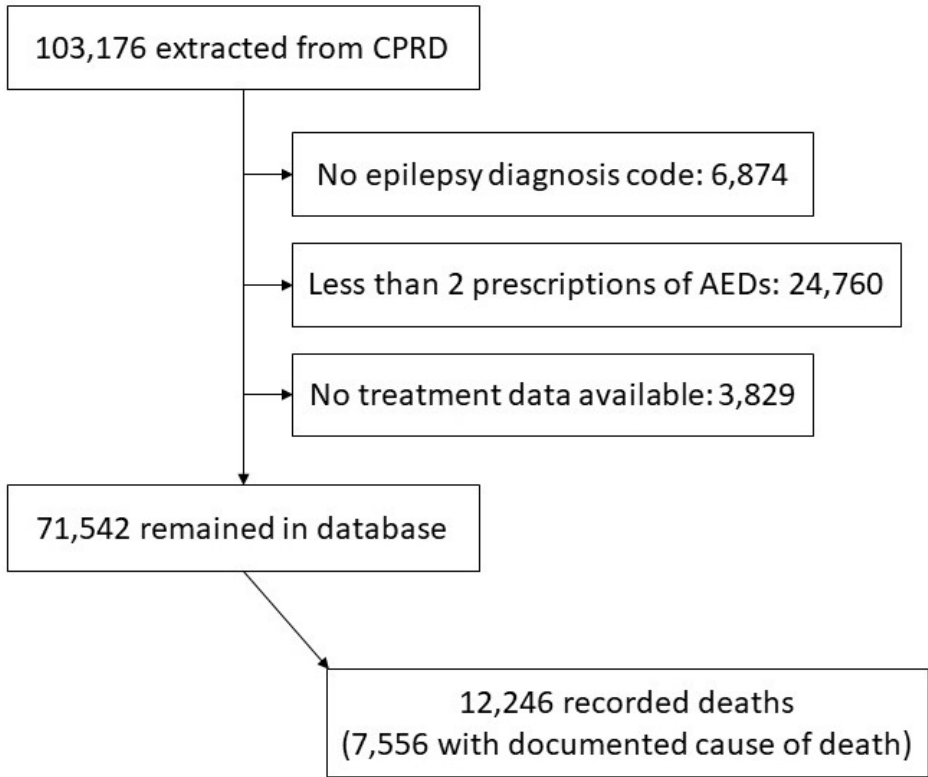

Figure 1. Flowchart of patient selection for analysis

183x156mm (96 x 96 DPI)

## Supplemental Material

### Coding of variables

**Age:** For cases: age = year of death – year of birth. For matched controls: age = year of death of the matched case – year of birth.

**For epilepsy related factors (ie. Relating to seizures and treatment) and lifestyle factors, data from the CPRD was used from the date of death of the matched case up to 12 months prior. These variables are listed below:**

**Seizure freedom:** recoded seizure freedom for > 12 months (medcode: 11015; readcode: 667F.00) in clinical CPRD data.

**Prescription adherence:** Calculated as a percentage of the previous 12-months covered by AED prescriptions from therapy CPRD data. The variable was converted to a categorical variable for the model by grouping into: 0-25%, >25-50%, >50-75% and >75%-100%.

**Number of antiepileptic drugs (AEDs):** Number of different types of AEDs prescribed in 12 months were grouped into categories: 0, 1, 2, 3 and 4 or more. Product codes (“prodcodes”) were used from therapy CPRD data to identify AEDs in the database.

**Status epilepticus:** recorded status epilepticus code in previous 12 months (medcode: 4093; readcode: F253.11) clinical CPRD data.

**Injury:** any injury documented in clinical CPRD data. A list of medcode/readcodes from clinical CPRD data included: injuries, fractures, dislocations, burns, bruising, contusions, lacerations, abrasions, concussions and wounds.

**Emergency department visit or emergency admission:** medcode/readcodes for emergency admissions or visits to emergency centres from clinical CPRD data. This included keywords: seen by emergency clinician, in accident and emergency, emergency admission.

**Smoking status:** Data was coded from medcodes/readcodes related to smoking or smoking cessation interventions in clinical CPRD data and overall smoking status if available in the CPRD Additional Files. For any patients that did not have a smoking status recording in the 12-month data period, the last known recording from clinical data was used. Used code list from *Validity of smoking prevalence estimates from primary care electronic health records compared with national population survey data for England, 2007 to 2011*. Helen P. Booth, A. Toby Prevost and Martin C. Gulliford. 2013.

**Depression:** the variable was coded as either a documented diagnostic medcode/readcode related to “depression” in clinical CPRD data or a prescription of antidepressants from therapy CRPD data in previous 12 months. Antidepressants were identified through their product codes (prodcodes) from therapy data.

**For co-morbidity, data coded for patient’s lifetime (within start and end dates with acceptable quality data recording):**

**Dementia:** medcode/readcode list including for “dementia” and “Alzheimer’s” in patient history from clinical CPRD data.

1  
2  
3 **Stroke:** medcode/readcode list including stroke, cerebral ischemia/arterial  
4 occlusion/haemorrhage/infarction. embolism in patient history from clinical CPRD data.  
5  
6  
7  
8  
9  
10  
11  
12  
13  
14  
15  
16  
17  
18  
19  
20  
21  
22  
23  
24  
25  
26  
27  
28  
29  
30  
31  
32  
33  
34  
35  
36  
37  
38  
39  
40  
41  
42  
43  
44  
45  
46  
47  
48  
49  
50  
51  
52  
53  
54  
55  
56  
57  
58  
59  
60

For peer review only

**Table S1.** Main cause of death of PWE registered in the CPRD between 2005 – 2013 by year

| ICD-10 category (ICD-10 code)                                                                     | 2005 (%)   | 2006 (%)   | 2007 (%)   | 2008 (%)   | 2009 (%)   | 2010 (%)   | 2011 (%)   | 2012 (%)   | 2013 (%)   |
|---------------------------------------------------------------------------------------------------|------------|------------|------------|------------|------------|------------|------------|------------|------------|
| Epilepsy (G40-G41)                                                                                | 6.3        | 6.3        | 5.9        | 6.1        | 5.7        | 6.2        | 5.2        | 7.1        | 5.2        |
| Certain infectious and parasitic diseases (A00-B99)                                               | 1.0        | 1.6        | 1.1        | 1.0        | 0.7        | 0.9        | 0.5        | 1.2        | 0.5        |
| Neoplasms (C00-D48)                                                                               | 20.9       | 19.4       | 17.6       | 19.6       | 19.0       | 18.1       | 21.8       | 21.4       | 20.9       |
| Diseases of the blood and blood-forming organs (D50-D89)                                          | 0.6        | 0.0        | 0.4        | 0.3        | 0.1        | 0.0        | 0.2        | 0.3        | 0.3        |
| Endocrine, nutritional and metabolic diseases (E00-E90)                                           | 1.5        | 1.7        | 1.7        | 1.1        | 1.6        | 1.7        | 1.1        | 1.0        | 1.1        |
| Mental and behavioural disorders (F00-F99)                                                        | 4.6        | 3.8        | 5.8        | 5.0        | 6.6        | 4.5        | 10.7       | 10.9       | 10.5       |
| Diseases of the nervous system (G00-G37, G43-G99)                                                 | 4.6        | 5.1        | 5.1        | 6.0        | 7.5        | 5.5        | 7.3        | 5.6        | 7.2        |
| Diseases of the circulatory system (I00-I99)                                                      | 33.8       | 35.1       | 34.0       | 34.0       | 31.3       | 33.1       | 28.3       | 26.8       | 28.1       |
| Diseases of the respiratory system (J00-J99)                                                      | 12.9       | 16.3       | 14.7       | 13.6       | 13.0       | 14.5       | 12.6       | 12.7       | 12.5       |
| Diseases of the digestive system (K00-KK93)                                                       | 3.8        | 3.3        | 4.3        | 4.6        | 4.1        | 4.8        | 4.9        | 4.9        | 5.0        |
| Diseases of the skin and subcutaneous tissue (L00-L99)                                            | 0.0        | 0.1        | 0.5        | 0.3        | 0.4        | 0.3        | 0.1        | 0.0        | 0.1        |
| Diseases of the musculoskeletal system and connective tissue (M00-M99)                            | 0.4        | 0.0        | 0.8        | 0.3        | 1.2        | 0.2        | 0.7        | 0.4        | 0.8        |
| Diseases of the genitourinary system (N00-N99)                                                    | 2.9        | 2.5        | 2.4        | 1.8        | 2.8        | 3.1        | 0.7        | 2.1        | 1.2        |
| Congenital malformations, deformations and chromosomal abnormalities (Q00-Q99)                    | 1.5        | 1.5        | 1.1        | 1.5        | 1.6        | 0.9        | 0.8        | 0.8        | 1.1        |
| Symptoms, signs and abnormal clinical and laboratory findings, not elsewhere classified (R00-R99) | 1.5        | 1.3        | 1.8        | 1.7        | 1.0        | 2.3        | 1.7        | 1.8        | 1.0        |
| External causes of morbidity and mortality (V01-X59, X85-Y98)                                     | 3.3        | 1.6        | 2.6        | 2.8        | 3.1        | 3.1        | 3.2        | 2.6        | 3.5        |
| External causes of morbidity and mortality (intentional) (X60-X84)                                | 0.4        | 0.4        | 0.1        | 0.4        | 0.4        | 0.8        | 0.2        | 0.3        | 1.0        |
| <b>Total (n)</b>                                                                                  | <b>521</b> | <b>687</b> | <b>761</b> | <b>785</b> | <b>836</b> | <b>874</b> | <b>886</b> | <b>956</b> | <b>987</b> |

1  
2  
3  
4  
5  
6  
7  
8  
9  
10  
11  
12  
13  
14  
15  
16  
17  
18  
19  
20  
21  
22  
23  
24  
25  
26  
27  
28  
29  
30  
31  
32  
33  
34  
35  
36  
37  
38  
39  
40  
41  
42  
43  
44  
45  
46  
47  
48  
49  
50  
51  
52  
53  
54  
55  
56  
57  
58  
59  
60

## STROBE Statement—checklist of items that should be included in reports of observational studies

|                              | Item No | Recommendation                                                                                                                                                                                                                                                                                                                                                                                                                                                         | Page No |
|------------------------------|---------|------------------------------------------------------------------------------------------------------------------------------------------------------------------------------------------------------------------------------------------------------------------------------------------------------------------------------------------------------------------------------------------------------------------------------------------------------------------------|---------|
| <b>Title and abstract</b>    | 1       | (a) Indicate the study's design with a commonly used term in the title or the abstract                                                                                                                                                                                                                                                                                                                                                                                 | 1       |
|                              |         | (b) Provide in the abstract an informative and balanced summary of what was done and what was found                                                                                                                                                                                                                                                                                                                                                                    | 2       |
| <b>Introduction</b>          |         |                                                                                                                                                                                                                                                                                                                                                                                                                                                                        |         |
| Background/rationale         | 2       | Explain the scientific background and rationale for the investigation being reported                                                                                                                                                                                                                                                                                                                                                                                   | 4       |
| Objectives                   | 3       | State specific objectives, including any prespecified hypotheses                                                                                                                                                                                                                                                                                                                                                                                                       | 4       |
| <b>Methods</b>               |         |                                                                                                                                                                                                                                                                                                                                                                                                                                                                        |         |
| Study design                 | 4       | Present key elements of study design early in the paper                                                                                                                                                                                                                                                                                                                                                                                                                | 4,5     |
| Setting                      | 5       | Describe the setting, locations, and relevant dates, including periods of recruitment, exposure, follow-up, and data collection                                                                                                                                                                                                                                                                                                                                        | 4,5     |
| Participants                 | 6       | (a) <i>Cohort study</i> —Give the eligibility criteria, and the sources and methods of selection of participants. Describe methods of follow-up<br><i>Case-control study</i> —Give the eligibility criteria, and the sources and methods of case ascertainment and control selection. Give the rationale for the choice of cases and controls<br><i>Cross-sectional study</i> —Give the eligibility criteria, and the sources and methods of selection of participants | 5       |
|                              |         | (b) <i>Cohort study</i> —For matched studies, give matching criteria and number of exposed and unexposed<br><i>Case-control study</i> —For matched studies, give matching criteria and the number of controls per case                                                                                                                                                                                                                                                 | 5       |
| Variables                    | 7       | Clearly define all outcomes, exposures, predictors, potential confounders, and effect modifiers. Give diagnostic criteria, if applicable                                                                                                                                                                                                                                                                                                                               | 5       |
| Data sources/<br>measurement | 8*      | For each variable of interest, give sources of data and details of methods of assessment (measurement). Describe comparability of assessment methods if there is more than one group                                                                                                                                                                                                                                                                                   | 5       |
| Bias                         | 9       | Describe any efforts to address potential sources of bias                                                                                                                                                                                                                                                                                                                                                                                                              | N/A     |
| Study size                   | 10      | Explain how the study size was arrived at                                                                                                                                                                                                                                                                                                                                                                                                                              | 5,6     |
| Quantitative variables       | 11      | Explain how quantitative variables were handled in the analyses. If applicable, describe which groupings were chosen and why                                                                                                                                                                                                                                                                                                                                           | 5,6     |
| Statistical methods          | 12      | (a) Describe all statistical methods, including those used to control for confounding                                                                                                                                                                                                                                                                                                                                                                                  | 5,6     |
|                              |         | (b) Describe any methods used to examine subgroups and interactions                                                                                                                                                                                                                                                                                                                                                                                                    | N/A     |
|                              |         | (c) Explain how missing data were addressed                                                                                                                                                                                                                                                                                                                                                                                                                            | 5       |
|                              |         | (d) <i>Cohort study</i> —If applicable, explain how loss to follow-up was addressed<br><i>Case-control study</i> —If applicable, explain how matching of cases and controls was addressed<br><i>Cross-sectional study</i> —If applicable, describe analytical methods taking account of sampling strategy                                                                                                                                                              | 5       |
|                              |         | (e) Describe any sensitivity analyses                                                                                                                                                                                                                                                                                                                                                                                                                                  |         |

Continued on next page

| <b>Results</b>           |     |                                                                                                                                                                                                              |         |
|--------------------------|-----|--------------------------------------------------------------------------------------------------------------------------------------------------------------------------------------------------------------|---------|
| Participants             | 13* | (a) Report numbers of individuals at each stage of study—eg numbers potentially eligible, examined for eligibility, confirmed eligible, included in the study, completing follow-up, and analysed            | Fig 1   |
|                          |     | (b) Give reasons for non-participation at each stage                                                                                                                                                         | Fig 1   |
|                          |     | (c) Consider use of a flow diagram                                                                                                                                                                           | Fig 1   |
| Descriptive data         | 14* | (a) Give characteristics of study participants (eg demographic, clinical, social) and information on exposures and potential confounders                                                                     | 6       |
|                          |     | (b) Indicate number of participants with missing data for each variable of interest                                                                                                                          | N/A     |
|                          |     | (c) <i>Cohort study</i> —Summarise follow-up time (eg, average and total amount)                                                                                                                             |         |
| Outcome data             | 15* | <i>Cohort study</i> —Report numbers of outcome events or summary measures over time                                                                                                                          |         |
|                          |     | <i>Case-control study</i> —Report numbers in each exposure category, or summary measures of exposure                                                                                                         | table 3 |
|                          |     | <i>Cross-sectional study</i> —Report numbers of outcome events or summary measures                                                                                                                           |         |
| Main results             | 16  | (a) Give unadjusted estimates and, if applicable, confounder-adjusted estimates and their precision (eg, 95% confidence interval). Make clear which confounders were adjusted for and why they were included | 8,9     |
|                          |     | (b) Report category boundaries when continuous variables were categorized                                                                                                                                    | table 3 |
|                          |     | (c) If relevant, consider translating estimates of relative risk into absolute risk for a meaningful time period                                                                                             | N/A     |
| Other analyses           | 17  | Report other analyses done—eg analyses of subgroups and interactions, and sensitivity analyses                                                                                                               | N/A     |
| <b>Discussion</b>        |     |                                                                                                                                                                                                              |         |
| Key results              | 18  | Summarise key results with reference to study objectives                                                                                                                                                     | 9,10    |
| Limitations              | 19  | Discuss limitations of the study, taking into account sources of potential bias or imprecision. Discuss both direction and magnitude of any potential bias                                                   | 11,12   |
| Interpretation           | 20  | Give a cautious overall interpretation of results considering objectives, limitations, multiplicity of analyses, results from similar studies, and other relevant evidence                                   | 10,11   |
| Generalisability         | 21  | Discuss the generalisability (external validity) of the study results                                                                                                                                        | 11,12   |
| <b>Other information</b> |     |                                                                                                                                                                                                              |         |
| Funding                  | 22  | Give the source of funding and the role of the funders for the present study and, if applicable, for the original study on which the present article is based                                                | 12      |

\*Give information separately for cases and controls in case-control studies and, if applicable, for exposed and unexposed groups in cohort and cross-sectional studies.

**Note:** An Explanation and Elaboration article discusses each checklist item and gives methodological background and published examples of transparent reporting. The STROBE checklist is best used in conjunction with this article (freely available on the Web sites of PLoS Medicine at <http://www.plosmedicine.org/>, Annals of Internal Medicine at <http://www.annals.org/>, and Epidemiology at <http://www.epidem.com/>). Information on the STROBE Initiative is available at [www.strobe-statement.org](http://www.strobe-statement.org).



# BMJ Open

## Epilepsy and mortality: a retrospective cohort analysis with a nested case-control study identifying causes and risk factors from primary care and linkage-derived data

|                                 |                                                                                                                                                                                                                                                                                                                                                                                                                                                                                                                                                                                                                                                                                   |
|---------------------------------|-----------------------------------------------------------------------------------------------------------------------------------------------------------------------------------------------------------------------------------------------------------------------------------------------------------------------------------------------------------------------------------------------------------------------------------------------------------------------------------------------------------------------------------------------------------------------------------------------------------------------------------------------------------------------------------|
| Journal:                        | <i>BMJ Open</i>                                                                                                                                                                                                                                                                                                                                                                                                                                                                                                                                                                                                                                                                   |
| Manuscript ID                   | bmjopen-2021-052841.R1                                                                                                                                                                                                                                                                                                                                                                                                                                                                                                                                                                                                                                                            |
| Article Type:                   | Original research                                                                                                                                                                                                                                                                                                                                                                                                                                                                                                                                                                                                                                                                 |
| Date Submitted by the Author:   | 04-Aug-2021                                                                                                                                                                                                                                                                                                                                                                                                                                                                                                                                                                                                                                                                       |
| Complete List of Authors:       | Wojewodka, Gabriella; King's College London Institute of Psychiatry Psychology and Neuroscience, Basic & Clinical Neuroscience<br>Gulliford, Martin; King's College London, School of Population Health and Environmental Sciences; NIHR Biomedical Research Centre at Guy's and Saint Thomas' NHS Foundation Trust and King's College<br>Ashworth, Mark; King's College London, School of Population Health & Environmental Sciences<br>Richardson, Mark; King's College London, Institute of Psychiatry, Psychology & Neuroscience<br>Ridsdale, Leone; King's College London Institute of Psychiatry Psychology and Neuroscience, Department of Basic and Clinical Neuroscience |
| <b>Primary Subject Heading</b>: | Neurology                                                                                                                                                                                                                                                                                                                                                                                                                                                                                                                                                                                                                                                                         |
| Secondary Subject Heading:      | General practice / Family practice                                                                                                                                                                                                                                                                                                                                                                                                                                                                                                                                                                                                                                                |
| Keywords:                       | Epilepsy < NEUROLOGY, PRIMARY CARE, EPIDEMIOLOGY                                                                                                                                                                                                                                                                                                                                                                                                                                                                                                                                                                                                                                  |
|                                 |                                                                                                                                                                                                                                                                                                                                                                                                                                                                                                                                                                                                                                                                                   |

SCHOLARONE™  
Manuscripts



I, the Submitting Author has the right to grant and does grant on behalf of all authors of the Work (as defined in the below author licence), an exclusive licence and/or a non-exclusive licence for contributions from authors who are: i) UK Crown employees; ii) where BMJ has agreed a CC-BY licence shall apply, and/or iii) in accordance with the terms applicable for US Federal Government officers or employees acting as part of their official duties; on a worldwide, perpetual, irrevocable, royalty-free basis to BMJ Publishing Group Ltd ("BMJ") its licensees and where the relevant Journal is co-owned by BMJ to the co-owners of the Journal, to publish the Work in this journal and any other BMJ products and to exploit all rights, as set out in our [licence](#).

The Submitting Author accepts and understands that any supply made under these terms is made by BMJ to the Submitting Author unless you are acting as an employee on behalf of your employer or a postgraduate student of an affiliated institution which is paying any applicable article publishing charge ("APC") for Open Access articles. Where the Submitting Author wishes to make the Work available on an Open Access basis (and intends to pay the relevant APC), the terms of reuse of such Open Access shall be governed by a Creative Commons licence – details of these licences and which [Creative Commons](#) licence will apply to this Work are set out in our licence referred to above.

Other than as permitted in any relevant BMJ Author's Self Archiving Policies, I confirm this Work has not been accepted for publication elsewhere, is not being considered for publication elsewhere and does not duplicate material already published. I confirm all authors consent to publication of this Work and authorise the granting of this licence.

1  
2  
3 **Epilepsy and mortality: a retrospective cohort analysis with a nested case-control study**  
4 **identifying causes and risk factors from primary care and linkage-derived data**  
5

6 **Gabriella Wojewodka<sup>1</sup>, Martin Gulliford<sup>2,3</sup>, Mark Ashworth<sup>2</sup>, Mark P. Richardson<sup>1</sup>, Leone Ridsdale<sup>1</sup>**  
7

8 <sup>1</sup> King's College London, Institute of Psychiatry, Psychology and Neuroscience, Department of Basic and Clinical  
9 Neuroscience, London, UK.

10  
11 <sup>2</sup> King's College London, School of Population Health and Environmental Sciences, London, UK.

12  
13 <sup>3</sup> National Institute for Health Research Biomedical Research Centre at Guy's and St Thomas' Hospitals, London,  
14 UK

15  
16  
17  
18 Corresponding author: Dr. Gabriella Wojewodka, King's College London, IoPPN, 16 De Crespigny  
19 Park, PO63, London, UK, SE5 8AF. email: gabriella.wojewodka@kcl.ac.uk  
20

21  
22  
23  
24 WORD COUNT: 3857  
25  
26  
27  
28  
29  
30  
31  
32  
33  
34  
35  
36  
37  
38  
39  
40  
41  
42  
43  
44  
45  
46  
47  
48  
49  
50  
51  
52  
53  
54  
55  
56  
57  
58  
59  
60

## ABSTRACT

### Objectives

People with epilepsy (PWE) have a higher mortality rate than the general population. Epilepsy related deaths have increased despite all-cause mortality decreasing in the general population pre-Covid-19. We hypothesized that clinical and lifestyle factors may identify people more at risk.

### Design

We used a retrospective cohort study to explore cause of death and a nested case-control study to identify risk factors.

### Setting

We explored factors associated with mortality using primary care population data from 01/04/2004 to 31/03/2014. Data was obtained from the Clinical Practice Research Datalink (CPRD) which compiles anonymised patient data from primary care in the UK. Cause of death data was supplemented from the Office of National Statistics when available.

### Participants

The analysis included 70,431 people with epilepsy, with 11,241 registered deaths.

### Results

The number of deaths within the database increased by 69% between the first and last year of the study. Epilepsy was considered as a contributing cause in approximately 45% of deaths of PWE under 35. Factors associated with increased risk of death included attendance at emergency departments and/or emergency admissions (OR: 3.48 CI: 3.19–3.80), anti-epileptic drug (AED) polytherapy (2 AEDs: OR 1.60 CI:1.51–1.71; 3 AEDs: OR: 2.06 CI: 1.86–2.29; 4+ AEDs: OR: 2.62 CI: 2.23–3.08), status epilepticus (OR: 2.78 CI: 1.64–4.71), depression (OR: 1.67 CI: 1.57–1.76) and injuries (OR: 1.54 CI: 1.35–1.56). No seizures in the prior year (OR: 0.52 CI: 0.41–0.65).

### Conclusion

Our results add to existing evidence that deaths in epilepsy are increasing. Future studies could focus on identifying PWE at high risk and addressing them with clinical interventions or better self-management. Identifying specific risk factors for younger people should be a priority as epilepsy may be a factor in close to half of deaths of PWE under 35 years of age.

**STRENGTHS AND LIMITATIONS OF THE STUDY**

- The study examines the higher mortality rate in epilepsy by exploring risk factors that could be mitigated by interventions in clinical practice
- The study included data collected in primary care which is large and representative compared to hospital data
- The large sample size collected from participating UK practices contributes to the generalisability of the results
- The data set used was from 2004 to 2014, as this covered a period where epilepsy was part of a national programme for outcome reporting.

For peer review only

## INTRODUCTION

Epilepsy is one of the most common neurological conditions with about 50 million people affected worldwide.<sup>1</sup> With access to good treatment, it is estimated that 60-70% of people with epilepsy (PWE) can become free of seizure.<sup>2</sup> However, epilepsy is also an important cause of premature death.<sup>3</sup> Mortality rates of people with epilepsy are higher than for the general population.<sup>4-9</sup> A longitudinal cohort study from Sweden found that an epilepsy diagnosis was associated with a 14-fold increased risk of all-cause death.<sup>5</sup> Some studies suggest that this has not changed over time.<sup>4 10</sup> Other data suggest the number of deaths in PWE is increasing despite a decrease in all-cause mortality in the general population.<sup>8 11 12</sup> Public Health England reported that deaths with epilepsy as a contributing factor increased by 70% between 2001 and 2014, while all-cause deaths in the population decreased by 6%.<sup>11</sup>

Some causes of death in PWE are similar to the general population, such as circulatory and respiratory diseases, dementia, Alzheimer's and cancers.<sup>11 13 14</sup> Others are related to consequences of the condition itself such as injuries, burns and drowning during seizures.<sup>5 9 15</sup> Lifestyle and psychosocial factors contribute to increased risk of mortality and include alcohol or substance misuse,<sup>13 16</sup> low adherence to medication,<sup>10</sup> depression,<sup>5 16</sup> and socioeconomic status.<sup>11 16</sup> Sudden unexpected death in epilepsy (SUDEP) is sometimes posited as a common cause of death for PWE. A recent review suggests SUDEP accounts for 12% of all-cause deaths in epilepsy.<sup>10</sup> However, factors that can be prevented or treated are under-researched and could lead to more impact on reducing mortality.

In 2011, our group published risk factors increasing mortality in PWE based on population data collected in primary care in the United Kingdom (UK) between 1993 and 2007.<sup>16</sup> Here, we follow-up on the analysis using data collected during an incentivised programme which rewarded enhanced monitoring and care for people with epilepsy in primary care over ten years. We hypothesised that the epilepsy data collected under this programme would be of high quality allowing for a comprehensive analysis of causes and risk factors associated with mortality. We report the number of deaths recorded during this time, the causes of death for younger and older PWE, and risk factors associated with mortality among PWE.

## METHODS

### Study Design

A retrospective cohort design was used to analyse mortality and causes of death in PWE. Risk factors affecting mortality were analysed using a nested case-control study. This study was approved by the Independent Scientific Advisory Committee of the CPRD (protocol 17\_208R2).

### Setting

Data was obtained from the Clinical Practice Research Datalink (CPRD). This database contains anonymised patient data obtained from electronic records from primary care clinics in the UK. The data is sent from participating clinics to a central server where data is cleaned, checked for quality and curated. A study from 2015 counted 11,299,221 patients registered in the CPRD from 674 GP practices.<sup>17</sup> Patients in the database were representative of the UK population when compared to the 2011 census.<sup>17</sup> For our study period, mid-year counts for 2004 show 4,584,065 patients were active in the database (alive and currently registered in a GP practice) with 50.1% being female. In 2013, 4,493,034 patients were active at mid-year and 50.4% were female.

Our study period was from 01/04/2004 to 31/03/2014 during which epilepsy management came under the Quality and Outcomes Framework (QOF), a programme implemented within the primary care setting. Revised QOF clinical indicators were implemented in April 2014 when most epilepsy indicators were discontinued. The aim of the programme was to incentivize improvement in the recording of clinical information on specific lifestyle items or long term health conditions with the view that structured monitoring and reporting improved the quality of care.<sup>18</sup>

### Types of data

The CPRD includes “patient data” which include demographic information, “clinical data” include information on clinical events such as diagnosis or symptoms, and “additional clinical details” that include lifestyle factors. It also includes “therapy data” which contains information on prescriptions, product codes, doses and treatment schedules. Clinical data are entered initially as alpha numeric Read codes by the GP into electronic medical records. These are converted into numeric Medcodes within the CPRD for easier analysis by researchers. Medication types are recorded in “therapy data” as numeric Procodes.

Cause of death information was obtained when available through linked data for a subset of patients from England and Wales from the Office of National Statistics (ONS). The cause of death is presented using ICD-10 diagnostic codes and offers the main cause and up to 15 contributing causes, if applicable. Date of death was available both from the CPRD and ONS data and the earliest date of the two was used if there were discrepancies. The Index of Multiple Deprivation (IMD) was also obtained for each patient’s GP practice, which was used for control matching in the case-control study. Practice IMD data was “most up to date” version when requested in 2018.

### Cohort study participants

For the mortality and cause of death cohort study, adults with epilepsy were included who were least 18 years old at time of death. Epilepsy was defined as having a documented epilepsy diagnostic code or seizure code and at least two prescriptions of antiepileptic drugs (AEDs). Using a diagnostic or seizure code with prescription data has been validated to identify cases of epilepsy in routinely collected data.<sup>19</sup> Any patient with a diagnostic code of “epilepsy resolved” was removed from the study (Medcodes 8385 and 12848, Read codes 2126000 and 212J.00). Codes used to identify epilepsy and seizures are presented in Table S1 (Supplemental File 1).

### Case-control study participants

Since we were focusing on the specific 12-month period prior to date of death to establish preventable risk factors, we opted to use a nested case-control study design. Cases were defined as PWE within the cohort with a documented date of death between 01/04/2004 to 31/03/2014 with at least 12 months of data recorded in our study period (thus earliest data of death included was 01/04/2005). Controls were randomly matched at a ratio of 3:1 by sex, practice IMD, year of birth (+/- 1 year). For cases aged 18, controls were matched for year of birth + 1 year. Controls were alive for at least 12 months after the date of death of their matched case. The first analysis was conducted for the whole dataset and a second one used data from PWE under the age of 35.

### Exposure variables

Potential variables were selected based on existing literature, items part of the QOF and others associated with lifestyle. Exposure data were refined based on the availability and reliability of data in the CPRD. Full description of variables and sources of data are included in the Supplemental File 1. List of codes used for each variable can be found in Supplemental File 2. We assessed variables occurring

1  
2  
3 in the 12 months prior to the case's date of death for emergency department visits or emergency  
4 admissions, number of AEDs, status epilepticus, depression, injury, smoking status, and seizure  
5 freedom. History of co-morbidity was taken from all available patient data for dementia and stroke.  
6 Missing data was considered as "no" for binary outcomes except for smoking status where the last  
7 known status was used, as previously reported.<sup>20</sup> Variables that were considered but not included due  
8 to poor quality of data included alcohol and substance use.  
9

## 10 11 **Statistics**

12  
13 The number all-cause deaths recorded in the CPRD was calculated for complete calendar years (from  
14 2005 to 2013) to allow for comparisons with previous publications. All other analyses used data from  
15 the full study period (01/04/2004 to 31/03/2014). The cause of death data was analysed two ways: 1)  
16 tabulating the main cause of death in PWE and 2) evaluating the proportion of deaths with epilepsy  
17 listed as a contributing cause. A contributing cause was defined as either the main cause or listed as a  
18 cause in any of the other 15 positions on the death certificate. The main causes of death are presented  
19 for younger and older PWE with 65 years as the cut-off. Deaths with epilepsy as a contributing cause  
20 were divided by age group. To track trends, an additional analysis of main cause of death by full  
21 calendar year is presented in supplemental material (Table S2, Supplemental File 1).  
22

23  
24 Conditional logistic regression was used for the nested case-control study. Variables were included in  
25 the model following maximum likelihood and Akaike information criterion (AIC) testing. Potential  
26 confounders such as age, sex, and deprivation were addressed by control matching. Data are  
27 presented as odds ratios (ORs) and 95% confidence intervals. The analysis was conducted for the  
28 whole dataset and subsequently for the subset of PWE aged under 35.  
29

30  
31 The following interactions were tested: age and emergency visit/admission, age and injury, age and  
32 dementia, age and stroke, status epilepticus and emergency visit/admissions, number of AEDs and  
33 seizure freedom, prescription issue and number of AEDs, injury and emergency visit/admission.  
34

## 35 **Patient and Public Involvement**

36  
37 Patients or the public were not involved in the design, or conduct, or reporting, or dissemination plans  
38 of our research.  
39

## 40 41 42 **RESULTS**

43  
44 We obtained a sample size of 70,431 PWE with 11,241 who had a documented date of death within  
45 our time frame (Figure 1). We obtained cause of death for 7,405 people from ONS linked data. Age of  
46 patients ranged 18 to 105 with 50.8% male.  
47

### 48 **Number of deaths**

49  
50 The number of deaths recorded in the database increased between 2005 to 2013, from 821 to 1,386  
51 which represents a 68.8% increase (Table 1). This increase was not attributed to more PWE being  
52 registered in the database as this decreased by 21.8% over the same period. The mean age of the  
53 participants within the database increased over time.  
54  
55  
56  
57  
58  
59  
60



**Table 1.** Number of recorded deaths of PWE in the CPRD per full year within the study period.

|                                                            | 2005           | 2006           | 2007           | 2008           | 2009           | 2010           | 2011           | 2012           | 2013           |
|------------------------------------------------------------|----------------|----------------|----------------|----------------|----------------|----------------|----------------|----------------|----------------|
| <b>Average age of adult PWE in the database, mean (SD)</b> | 48.7<br>(18.5) | 49.0<br>(18.6) | 49.3<br>(18.6) | 49.6<br>(18.6) | 49.9<br>(18.6) | 50.2<br>(18.6) | 50.5<br>(18.6) | 50.8<br>(18.6) | 51.2<br>(18.6) |
| <b>Number of PWE registered in the database</b>            | 48,447         | 48,585         | 48,031         | 46,948         | 45,941         | 44,485         | 42,521         | 40,120         | 37,865         |
| <b>Number of recorded deaths</b>                           | 821            | 1,075          | 1,190          | 1,241          | 1,214          | 1,307          | 1,282          | 1,386          | 1,386          |
| <b>Number of deaths per 1000 PWE in the CPRD</b>           | 16.9           | 22.1           | 24.8           | 26.4           | 26.4           | 29.4           | 30.1           | 34.5           | 36.6           |

Note: PWE defined as having an epilepsy diagnostic code and at least two prescriptions of AEDs, aged >17. Study period was from 1<sup>st</sup> April 2004 to 31<sup>st</sup> March 2014. Only data from full calendar years within this time frame were used for this table.

### Cause of death

The main causes of death for PWE aged 18 to 64 years old were neoplasms (26.8%), diseases of the circulatory system (15.4%) and epilepsy (14.2%) (Table 2a). For PWE 65 years and over, the main causes of death were diseases of the circulatory system (37.3%), neoplasms (17.2%) and diseases of the respiratory system (15.6%) (Table 2b). Deaths due to epilepsy as a primary cause were documented in 2.7% of older PWE.

**Table 2a.** Documented main cause of death of people with epilepsy under 65 years

| ICD-10 category                                                                                   | Under 65, n (%) |
|---------------------------------------------------------------------------------------------------|-----------------|
| Neoplasms (C00-D48)                                                                               | 571 (26.9)      |
| Diseases of the circulatory system (I00-I99)                                                      | 330 (15.6)      |
| Epilepsy (G40-G41)                                                                                | 302 (14.2)      |
| Diseases of the respiratory system (J00-J99)                                                      | 176 (8.3)       |
| Diseases of the nervous system (G00-G37, G43-G99), excluding epilepsy                             | 164 (7.7)       |
| Diseases of the digestive system (K00-KK93)                                                       | 161 (7.6)       |
| External causes of morbidity and mortality (V01-X59, X85-Y98)                                     | 129 (6.1)       |
| Congenital malformations, deformations and chromosomal abnormalities (Q00-Q99)                    | 70 (3.3)        |
| Mental and behavioural disorders (F00-F99)                                                        | 61 (2.9)        |
| Endocrine, nutritional and metabolic diseases (E00-E90)                                           | 34 (1.6)        |
| Symptoms, signs and abnormal clinical and laboratory findings, not elsewhere classified (R00-R99) | 29 (1.4)        |
| External causes of morbidity and mortality (intentional) (X60-X84)                                | 28 (1.3)        |
| Diseases of the genitourinary system (N00-N99)                                                    | 23 (1.1)        |
| Certain infectious and parasitic diseases (A00-B99)                                               | 20 (0.9)        |

|                                                                        |                      |
|------------------------------------------------------------------------|----------------------|
| Diseases of the blood and blood-forming organs (D50-D89)               | 9 (0.4)              |
| Diseases of the musculoskeletal system and connective tissue (M00-M99) | 9 (0.4)              |
| Diseases of the skin and subcutaneous tissue (L00-L99)                 | 4 (0.2)              |
| <b>Total</b>                                                           | <b>2,120 (100.0)</b> |

**Table 2b.** Documented main cause of death of people with epilepsy aged 65 and over

| ICD-10 category                                                                                   | 65 and over, n (%)   |
|---------------------------------------------------------------------------------------------------|----------------------|
| Diseases of the circulatory system (I00-I99)                                                      | 1973 (37.3)          |
| Neoplasms (C00-D48)                                                                               | 910 (17.2)           |
| Diseases of the respiratory system (J00-J99)                                                      | 827 (15.6)           |
| Mental and behavioural disorders (F00-F99)                                                        | 479 (9.1)            |
| Diseases of the nervous system (G00-G37, G43-G99), excluding epilepsy                             | 295 (5.6)            |
| Diseases of the digestive system (K00-KK93)                                                       | 173 (3.3)            |
| Epilepsy (G40-G41)                                                                                | 142 (2.7)            |
| Diseases of the genitourinary system (N00-N99)                                                    | 130 (2.5)            |
| External causes of morbidity and mortality (V01-X59, X85-Y98)                                     | 88 (1.7)             |
| Symptoms, signs and abnormal clinical and laboratory findings, not elsewhere classified (R00-R99) | 86 (1.6)             |
| Endocrine, nutritional and metabolic diseases (E00-E90)                                           | 67 (1.3)             |
| Certain infectious and parasitic diseases (A00-B99)                                               | 46 (0.9)             |
| Diseases of the musculoskeletal system and connective tissue (M00-M99)                            | 29 (0.5)             |
| Congenital malformations, deformations and chromosomal abnormalities (Q00-Q99)                    | 15 (0.3)             |
| Diseases of the skin and subcutaneous tissue (L00-L99)                                            | 13 (0.2)             |
| Diseases of the blood and blood-forming organs (D50-D89)                                          | 8 (0.2)              |
| External causes of morbidity and mortality (intentional) (X60-X84)                                | 4 (0.1)              |
| <b>Total</b>                                                                                      | <b>5,285 (100.0)</b> |

We tabulated the number of deaths with epilepsy listed as a cause of death, either the main or a contributing cause (Table 3). In PWE under 35, almost 45% of deaths had epilepsy as a contributory cause (35.1% to 53.3%, with a mean of 44.2%) (Table 3). The trends are similar between sexes under 35 and over 65. However, they differ in middle-age. At the 40-44 age group, epilepsy-contributing deaths were 2-fold higher in male compared to female PWE.

**Table 3.** Epilepsy documented as a contributing cause of death by age group

| Age group | Male                |                                                                             | Female              |                                                                             |
|-----------|---------------------|-----------------------------------------------------------------------------|---------------------|-----------------------------------------------------------------------------|
|           | All cause deaths, n | Deaths with epilepsy as contributing cause, n (%) [95% Confidence Interval] | All cause deaths, n | Deaths with epilepsy as contributing cause, n (%) [95% Confidence Interval] |
| 18-19     | 15                  | 8 (53.3) [28.1 – 78.6]                                                      | 8                   | 3 (37.5) [4.0 – 71.0]                                                       |
| 20-24     | 37                  | 17 (45.9) [29.9 – 62.0]                                                     | 29                  | 13 (44.8) [26.7 – 62.9]                                                     |
| 25-29     | 45                  | 22 (48.9) [34.3 – 63.5]                                                     | 37                  | 17 (45.9) [29.9 – 62.0]                                                     |
| 30-34     | 64                  | 27 (42.2) [30.1 – 54.3]                                                     | 37                  | 13 (35.1) [19.8 – 50.5]                                                     |
| 35-39     | 81                  | 19 (23.5) [14.2 – 32.7]                                                     | 62                  | 17 (27.4) [16.3 – 38.5]                                                     |
| 40-44     | 135                 | 44 (32.6) [24.7 – 40.5]                                                     | 75                  | 12 (16.0) [7.7 – 24.3]                                                      |

|        |     |                         |     |                         |
|--------|-----|-------------------------|-----|-------------------------|
| 45-49  | 157 | 42 (26.8) [19.8 – 33.7] | 104 | 18 (17.3) [10.0 – 24.6] |
| 50-54  | 213 | 58 (27.2) [21.3 – 33.2] | 114 | 19 (16.7) [9.8 – 23.5]  |
| 55-59  | 238 | 44 (18.5) [13.6 – 23.4] | 165 | 23 (13.9) [8.7 – 19.2]  |
| 60-64  | 291 | 63 (21.6) [16.9 – 26.4] | 213 | 36 (16.9) [11.9 – 21.9] |
| 65-69  | 323 | 42 (13.0) [9.3 – 16.7]  | 266 | 38 (14.3) [10.1 – 18.5] |
| 70-74  | 442 | 60 (13.6) [10.4 – 16.8] | 295 | 34 (11.5) [7.9 – 15.2]  |
| 75-79  | 475 | 44 (9.3) [6.7 – 11.9]   | 444 | 57 (12.8) [9.7 – 15.9]  |
| 80-84  | 517 | 53 (10.3) [7.6 – 12.9]  | 578 | 68 (11.8) [9.1 – 14.4]  |
| 85-89  | 485 | 54 (11.1) [8.3 – 13.9]  | 623 | 62 (10.0) [7.6 – 12.3]  |
| 90-105 | 290 | 22 (7.6) [4.5 – 10.6]   | 547 | 65 (11.9) [9.2 – 14.6]  |

To explore whether there were changes in the causes of death over time, we tabulated the main cause of death by year (Supplementary File 1, Table S2). Diseases of the circulatory system were consistently listed as the highest main cause of death for each year. The proportion of deaths due to mental and behavioural disorders doubled from 2011 onwards (mean percentage for 2005 to 2010: 5.05%, mean percentage for 2011 to 2013: 10.7%). The proportion of deaths attributed to epilepsy as the primary cause remained relatively stable throughout (6.3% for 2005 to 5.2% for 2013), although the number of deaths this represented increased (33 in 2005 to 51 to 2013).

### Risk factors

Risk factors included in the model, frequencies and associated ORs are presented in Table 4. Attendance at emergency departments in the previous 12 months was associated with the highest risk (OR: 3.48 CI: 3.19 – 3.80). Compared to being prescribed one AED, prescription of two or more AEDs was associated with an elevated risk of death (2 AEDs: OR: 1.60 CI: 1.51 – 1.71; 3 AEDs: OR: 2.06 CI: 1.86 – 2.29; 4+ AEDs: OR: 2.62 CI: 2.23 – 3.08), while no AED prescription was associated with a lower risk (OR: 0.77 CI: 0.68 – 0.87) (Table 4). Other factors associated with an increased risk of mortality included experiencing status epilepticus within the past 12 months (OR: 2.78 CI: 1.64 – 4.71), depression (OR: 1.67 CI: 1.57 – 1.76), smoking (OR: 1.45 CI: 1.35 – 1.56), injury (OR: 1.54 CI: 1.43 – 1.67), and history of dementia (OR: 1.39 CI: 1.26 – 1.53) and stroke (OR: 1.07 CI: 1.01 – 1.14).

A lower risk of death was associated with seizure freedom in the previous 12 months (OR: 0.52 CI: 0.41 – 0.65).

We found an interaction between having an emergency department visit or emergency admission and injury (OR: 0.59 CI: 0.48 – 0.70).

As the cohort analysis of cause of death revealed epilepsy was a significant contributing factor of the cause of death in young PWE, we repeated the risk factor analysis for PWE aged under 35. Significant risk factors associated with risk of death included emergency department visit (OR: 3.90 CI: 2.44 – 6.23), number of AEDs (No AEDs: 0.42 CI 0.21 – 0.84, 2 AEDs: OR: 1.72 CI: 1.23 – 2.40; 3 AEDs OR: 2.37 CI 1.52 – 3.67, 4+ AEDs: OR: 3.76 CI: 2.26 – 6.26), injury (OR: 1.99 CI: 1.19 – 3.31) and seizure freedom (OR: 0.17 CI 0.02 – 1.44).

**Table 4.** Risk factors Increasing mortality in PWE

| Factor                                                | Group      | All            |              |            |                         | Age < 35       |             |            |                         |
|-------------------------------------------------------|------------|----------------|--------------|------------|-------------------------|----------------|-------------|------------|-------------------------|
|                                                       |            | Controls n (%) | Cases n (%)  | Odds Ratio | 95% Confidence interval | Controls n (%) | Cases n (%) | Odds Ratio | 95% Confidence interval |
| Emergency department visit or emergency admission     | no         | 25,712 (94.2)  | 7,469 (82.1) | reference  |                         | 875 (95.9)     | 252 (82.9)  | reference  |                         |
|                                                       | yes        | 1,576 (5.8)    | 1,627 (17.9) | 3.48       | 3.19 - 3.80             | 37 (4.1)       | 52 (17.1)   | 3.90       | 2.44 – 6.23             |
| Number of AEDs prescribed                             | 0          | 1,667 (6.1)    | 353 (3.9)    | 0.77       | 0.68 - 0.87             | 107 (11.7)     | 10 (3.3)    | 0.42       | 0.21 – 0.84             |
|                                                       | 1          | 18,768 (68.8)  | 5,233 (57.5) | reference  |                         | 480 (52.6)     | 116 (38.2)  | reference  |                         |
|                                                       | 2          | 5,196 (19.0)   | 2,453 (27.0) | 1.60       | 1.51 - 1.71             | 196 (21.5)     | 86 (28.3)   | 1.72       | 1.23 – 2.40             |
|                                                       | 3          | 1,231 (4.5)    | 732 (8.0)    | 2.06       | 1.86 - 2.29             | 85 (9.3)       | 48 (15.8)   | 2.37       | 1.52 – 3.67             |
|                                                       | 4+         | 426 (1.6)      | 325 (3.6)    | 2.62       | 2.23 - 3.08             | 44 (4.8)       | 44 (14.5)   | 3.76       | 2.26 – 6.26             |
| Status epilepticus                                    | no         | 27,261 (99.9)  | 9,060 (99.6) | reference  |                         |                |             |            |                         |
|                                                       | yes        | 27 (0.1)       | 36 (0.4)     | 2.78       | 1.64 - 4.71             |                |             |            |                         |
| Depression                                            | no         | 21,790 (79.9)  | 6,158 (67.7) | reference  |                         |                |             |            |                         |
|                                                       | yes        | 5,498 (20.1)   | 2,938 (32.3) | 1.67       | 1.57 - 1.76             |                |             |            |                         |
| Smoking status                                        | Non-smoker | 23,904 (87.6)  | 7,579 (83.3) | reference  |                         |                |             |            |                         |
|                                                       | Smoker     | 3,384 (12.4)   | 1,517 (16.7) | 1.45       | 1.35 - 1.56             |                |             |            |                         |
| Injury                                                | no         | 24,347 (89.2)  | 7,579 (83.3) | reference  |                         | 864 (94.7)     | 270 (88.8)  | reference  |                         |
|                                                       | yes        | 2,941 (10.8)   | 1,517 (16.7) | 1.54       | 1.43 - 1.67             | 48 (5.3)       | 34 (11.2)   | 1.99       | 1.19 – 3.31             |
| Dementia                                              | no         | 25,698 (94.2)  | 8,328 (91.6) | reference  |                         |                |             |            |                         |
|                                                       | yes        | 1,590 (5.8)    | 768 (8.4)    | 1.39       | 1.26 - 1.53             |                |             |            |                         |
| Stroke                                                | no         | 21,699 (79.5)  | 6,960 (76.5) | reference  |                         |                |             |            |                         |
|                                                       | yes        | 5,589 (20.5)   | 2,136 (23.5) | 1.07       | 1.01 - 1.14             |                |             |            |                         |
| Age                                                   |            |                |              | 1.15       | 1.11 - 1.19             |                |             |            |                         |
| Seizure-free in previous 12 months                    | no         | 25,180 (92.3)  | 8,611 (94.7) | reference  |                         | 895 (98.1)     | 303 (99.7)  | reference  |                         |
|                                                       | yes        | 2,108 (7.7)    | 485 (5.3)    | 0.52       | 0.41 - 0.65             | 17 (1.9)       | 1 (0.3)     | 0.17       | 0.02 – 1.44             |
| Interaction: emergency department/ admission x injury |            |                |              | 0.59       | 0.48 – 0.70             |                |             |            |                         |

## DISCUSSION

We examined the causes of death among PWE and risk factors associated with mortality in a group of PWE derived from primary care data. The number of PWE with recorded deaths increased throughout our 9-year study period while the deaths attributed to epilepsy remained stable. In our model, we found important factors associated with a higher risk of mortality, some of which could be identified and potentially ameliorated by step-up care.

There were differences in the proportion of deaths attributed to epilepsy between younger and older PWE. Studies have found deaths of younger PWE are more often attributed to epilepsy.<sup>21 22</sup> Indeed, epilepsy was the third highest main cause of death in younger PWE in our study, accounting for almost 15% of deaths. This increased to 35-50% when evaluating all contributing causes in age groups under 35. As younger PWE tend to have less co-morbidity than older adults, it may be simpler to attribute epilepsy as the main cause of death. New diagnoses of epilepsy in people over 65 are often secondary to cerebrovascular disease such as stroke or neoplasms in the brain.<sup>23</sup> In our study, dementia was found to increase the risk of death, which has been found to share biological links with epilepsy.<sup>24</sup> New onset epilepsy in older people tends to be better controlled with AEDs.<sup>25</sup> Thus, other co-morbidity may take precedence in older PWE when documenting the cause of death, as epilepsy contributed to only about 10% of deaths and was listed as a main cause in 3%.

### Factors associated with increased risk of death

Our findings support evidence from previous studies. Factors associated with risk of mortality in epilepsy included: depression,<sup>5 16 26</sup> injuries,<sup>3 5 9 16 27</sup> dementia and stroke,<sup>13 28</sup> age,<sup>13</sup> and seizure freedom.<sup>3 13 15 16</sup> Novel findings include increased risk associated with emergency department visits and/or emergency admissions, prescription of more than one AED, and status epilepticus. Status epilepticus is a known cause of death,<sup>13 22 29</sup> however, to our knowledge, it has not been included within a risk model before.

For the younger PWE group, emergency visit or emergency admissions, number of AEDs and injury were associated with higher risk of death. While, like the wider-sample, seizure freedom was associated with a lower risk of death.

### Clinical Implications

#### Epilepsy management

The need for better epilepsy management is at the core of our findings. Several risk factors are linked within this theme such as emergency department attendance, polypharmacy, injury, and seizure freedom.

Visits to emergency departments or emergency admissions were associated with a 3-fold increased risk of death, the highest risk in our model. Visits to emergency services are associated with having injuries,<sup>30</sup> experiencing a seizure or a change in normal seizure presentation,<sup>31</sup> and having less confidence in self-management.<sup>32</sup> Attendance at emergency departments for epilepsy could thus be considered a surrogate marker for poorer epilepsy control.<sup>33</sup> The National Audit of Seizure management in Hospitals (NASH), conducted during our study period in 2011 and 2013, found 63% of PWE presenting to emergency departments for seizures had not been seen by a specialist in the previous year.<sup>34</sup> Moreover only half of attendees were either seen by a neurologist on site or referred to one upon discharge.<sup>34</sup> These are missed opportunities to follow-up with patients who may be in need of clinical review and help with self-management, to mitigate their greater risk of death.

### Areas for possible intervention

Regular medication review for people on multiple AEDs may be important as increased mortality risk was associated with two or more AEDs. Prescriptions of multiple AEDs may be an effect of having more refractory and harder to control epilepsy. However, polypharmacy may also result in more side-effects and different treatment schedules which could lead to more problems with medication adherence.<sup>35</sup>

Depression has been reported in about 25% of PWE.<sup>36 37</sup> In our study, we found 30% of cases and 20% of controls had either a diagnosis of depression or a prescription of anti-depressants. Depression and other psychiatric disorders have been found to be associated with worse quality of life<sup>38</sup> and affect self-management.<sup>39</sup> Many PWE have said they do not feel their mental health needs are being addressed and thus depression may be underassessed in this patient group.<sup>40</sup> As the proportion of deaths with psychiatric illness as a main cause increased 2-fold in our study period, psychiatric assessment and management should be provided for people with epilepsy.

Ultimately, the goal of better epilepsy management is seizure reduction or seizure freedom. Seizure freedom was associated with approximately a 50% reduced risk of mortality in our model. Previous findings showed seizure freedom conveyed similar mortality rates for PWE as those observed in the general population.<sup>15</sup>

### Other factors

We explored lifestyle factors which may be associated with increased mortality and found smoking to be associated with a higher risk. Other findings may be less amenable to change, although some intervention may be helpful. For example, experiencing status epilepticus in the previous 12 months was associated with a higher risk of death. In epilepsy, it is most often associated with low blood levels of AEDs or alcohol misuse.<sup>41</sup> Injury to the brain (trauma, hypoxia, anoxia), tumours, infections and stroke can also trigger status epilepticus and thus it may not be preventable.<sup>41</sup>

### Strengths and limitations

The CPRD contains data collected from primary care which is vast and increased the generalisability of results as all participating UK practices were included. However, we relied on clinical data which has some limitations as compared to epidemiological studies. It is possible that a small number of cases might have been misclassified as having epilepsy but our case definitions of an epilepsy diagnostic code and AED prescription have been validated and used in previous studies.<sup>16 19 42</sup> Conversely, patients who presented to emergency departments or were managed only by hospital specialists might not have been included.

The quality of information in the CPRD is dependent on data entered by practice staff during consultations for clinical use, not for research purposes. Items not applicable for a patient may be left off, rather than recorded as such. In the case of diagnosis, there is no option for a GP to enter an absence of diagnosis. Missing data in routine primary care databases are not missing at random and thus statistical methods of dealing with missing data, such as multiple imputation, may not be appropriate.<sup>43 44</sup> For this reason, we interpreted missing data as “no” or “no complication”, however we recognise this may be a limitation for some factors. Other limitations include not knowing the cause of injuries or hospital attendance and thus they may be unrelated to epilepsy.

We defined the exposure variables based on previous studies, if available.<sup>16 20 45</sup> The CPRD information has been validated for long term-conditions, such as dementia and Alzheimer’s disease, and for diagnoses made by hospital consultants.<sup>46</sup> As GPs issue prescriptions via electronic systems, the CPRD “therapy data” has been found to be highly accurate for medication variables.<sup>47</sup> However, we included



1  
2  
3 variables which may not have been previously validated such as injury and emergency department  
4 visit or emergency admission which is a limitation of this study. We explored other factors such as  
5 severe mental illness, self-injury, patient-level index of multiple deprivation, alcohol use, substance  
6 use, pregnancy and learning disability. These were found statistically not significant and not included  
7 in the final overall model or the under-35 model.  
8  
9

10 The time frame of our analysis corresponded to the period where epilepsy was part of the Quality and  
11 Outcomes Framework, a programme whereby GPs were contracted to record specific characteristics  
12 of their patients with epilepsy.<sup>48</sup> In particular, data on drug treatment, seizure frequency and seizure  
13 freedom were part of this programme.<sup>48</sup> We hypothesized that this would lead to better quality data  
14 for epilepsy and strengthen the study. While the data collected may be more complete than years  
15 prior, GP practices were less successful in achieving targets for epilepsy compared to other conditions,  
16 some of which are more highly rewarded.<sup>48 49</sup> Older data may contain outdated diagnoses of epilepsy  
17 which may not have been reconfirmed by today's standards, and if in remission, might not have been  
18 designated with an epilepsy resolved code. This could lead to missing epilepsy data. However, the  
19 strength of the CRPD is the vast data collected from the community setting compared to hospital  
20 databases or disease specific registers.<sup>19 42</sup>  
21  
22  
23

24 A limitation of our cohort study is the use of linked ONS data, which is only available for consenting  
25 individuals from England and Wales. Thus, data was not available for our whole cohort, and findings  
26 are not generalisable to Scotland and Northern Ireland. Death certificate data for epilepsy has often  
27 been found to be problematic. A 2002 audit of UK data found up to 40% of deaths were attributed to  
28 the wrong cause for PWE.<sup>50</sup> Epilepsy tends to be underestimated as a cause of death<sup>8 26</sup> and dismissed  
29 for other cardiovascular or respiratory explanations.<sup>21 26 51</sup> Indeed, we found other diseases were listed  
30 as primary cause of death which may in fact have been epilepsy. The percentage of deaths with  
31 epilepsy as a main cause remained stable throughout our study, suggesting that practice may not have  
32 changed during this time.  
33  
34

### 35 **Research Implications**

36  
37 Our initial risk factor model took into account PWE of all ages. However, as the main causes of death  
38 differ between younger and older PWE, risk factors may also be different. Thus, we repeated the  
39 analysis including PWE under the age of 35. Fewer of the variables were included in this model with  
40 the main differences being in lower ORs for having no AED prescription and being seizure free. The  
41 highest excess mortality due to epilepsy has been observed in younger people.<sup>15</sup> This would benefit  
42 from more research aiming to identify specific risks in younger PWE, particularly as we found epilepsy  
43 contributed to close to 50% of deaths in some younger age groups. We also did not evaluate potential  
44 causes of epilepsy, such as whether stroke or tumours preceded an epilepsy diagnosis, and whether  
45 this would impact mortality. In addition, the analysis may benefit from being repeated with more  
46 recent data from the CPRD and ONS.  
47  
48  
49  
50

### 51 **CONCLUSION**

52  
53 Several reports, including ours, have shown deaths in epilepsy continue to rise. Epilepsy is deemed a  
54 contributing cause of death particularly in young PWE, but less so in those over 65. While epilepsy in  
55 older people may be better controlled with AEDs, co-morbidity may mask the impact of epilepsy. We  
56 found certain factors are associated with risk of death such as emergency department attendance for  
57 epilepsy and admission, AED polytherapy, depression, and injuries. These could be addressed with  
58 clinical intervention and more information for self-management.  
59  
60

**FUNDING**

This work was partly funded by SUDEP Action (award number not applicable).

**AUTHOR CONTRIBUTIONS**

GW conducted the study, statistical analysis, and write-up of manuscript. MG contributed to the study design, supported the statistical analysis, and write-up. MA contributed to the study design and write-up. MPR contributed to study design. LR contributed to the study design, interpretation, and write-up of findings.

**COMPETING INTERESTS**

The authors declare no competing interests.

**DATA SHARING STATEMENT**

This study uses data that is obtained from the CPRD. Requests for data must be approved via the CPRD's Research Data Governance process (formerly the Independent Scientific Advisory Committee).

**ETHICS STATEMENT**

This study was approved by the CPRD Independent Scientific Advisory Committee (protocol reference: 17\_208R2).

**Figure caption**

Figure 1. Flowchart of participant selection



## References

1. World Health Organization. Epilepsy 2019 [updated 20/06/2019. Available from: <https://www.who.int/news-room/fact-sheets/detail/epilepsy> accessed 26/11/2020.
2. Duncan JS, Sander JW, Sisodiya SM, et al. Adult epilepsy. *Lancet* 2006;367(9516):1087-100. doi: <http://dx.doi.org/10.1016/S0140-6736%2806%2968477-8>
3. Thurman DJ, Logroscino G, Beghi E, et al. The burden of premature mortality of epilepsy in high-income countries: A systematic review from the Mortality Task Force of the International League Against Epilepsy. *Epilepsia* 2017;58(1):17-26. doi: <https://doi.org/10.1111/epi.13604>
4. Neligan A, Bell GS, Shorvon SD, et al. Temporal trends in the mortality of people with epilepsy: a review. *Epilepsia* 2010;51(11):2241-6. doi: 10.1111/j.1528-1167.2010.02711.x
5. Fazel S, Wolf A, Langstrom N, et al. Premature mortality in epilepsy and the role of psychiatric comorbidity: a total population study. *Lancet* 2013;382(9905):1646-54. doi: 10.1016/S0140-6736(13)60899-5
6. Quintana M, Sánchez-López J, Mazuela G, et al. Incidence and mortality in adults with epilepsy in northern Spain. *Acta Neurologica Scandinavica*;n/a(n/a) doi: <https://doi.org/10.1111/ane.13349> [published Online First: 24/09/2020]
7. Trinka E, Bauer G, Oberaigner W, et al. Cause-specific mortality among patients with epilepsy: results from a 30-year cohort study. *Epilepsia* 2013;54(3):495-501. doi: 10.1111/epi.12014 [published Online First: 2012/11/22]
8. DeGiorgio CM, Curtis A, Carapetian A, et al. Why are epilepsy mortality rates rising in the United States? A population-based multiple cause-of-death study. *BMJ Open* 2020;10(8):e035767. doi: 10.1136/bmjopen-2019-035767
9. Nilsson L, Tomson T, Farahmand BY, et al. Cause-specific mortality in epilepsy: a cohort study of more than 9,000 patients once hospitalized for epilepsy. *Epilepsia* 1997;38(10):1062-8. doi: 10.1111/j.1528-1157.1997.tb01194.x
10. Mbizvo GK, Bennett K, Simpson CR, et al. Epilepsy-related and other causes of mortality in people with epilepsy: A systematic review of systematic reviews. *Epilepsy Res* 2019;157:106192. doi: 10.1016/j.eplepsyres.2019.106192
11. Public Health England. Deaths Associated with Neurological Conditions in England, 2001 to 2014. London, UK: Public Health England, 2018.
12. Greenlund SF, Croft JB, Kobau R. Epilepsy by the Numbers: Epilepsy deaths by age, race/ethnicity, and gender in the United States significantly increased from 2005 to 2014. *Epilepsy Behav* 2017;69:28-30. doi: 10.1016/j.yebeh.2017.01.016
13. Keezer MR, Bell GS, Neligan A, et al. Cause of death and predictors of mortality in a community-based cohort of people with epilepsy. *Neurology* 2016;86(8):704-12. doi: 10.1212/WNL.0000000000002390
14. Morgan CL, Kerr MP. Epilepsy and mortality: a record linkage study in a U.K. population. *Epilepsia* 2002;43(10):1251-5. doi: 10.1046/j.1528-1157.2002.38701.x
15. Mohanraj R, Norrie J, Stephen LJ, et al. Mortality in adults with newly diagnosed and chronic epilepsy: a retrospective comparative study. *Lancet Neurology* 2006;5(6):481-87. doi: 10.1016/s1474-4422(06)70448-3
16. Ridsdale L, Charlton J, Ashworth M, et al. Epilepsy mortality and risk factors for death in epilepsy: a population-based study. *Br J Gen Pract* 2011;61(586):e271-8. doi: 10.3399/bjgp11X572463
17. Herrett E, Gallagher AM, Bhaskaran K, et al. Data Resource Profile: Clinical Practice Research Datalink (CPRD). *International Journal of Epidemiology* 2015;44(3):827-36. doi: 10.1093/ije/dyv098
18. The Health and Social Care Information Centre. QOF 2004/05 background 2012.
19. Fonferko-Shadrach B, Lacey AS, White CP, et al. Validating epilepsy diagnoses in routinely collected data. *Seizure* 2017;52:195-98. doi: 10.1016/j.seizure.2017.10.008 [published Online First: 2017/10/13]

20. Booth HP, Prevost AT, Gulliford MC. Validity of smoking prevalence estimates from primary care electronic health records compared with national population survey data for England, 2007 to 2011. *Pharmacoepidemiol Drug Saf* 2013;22(12):1357-61. doi: 10.1002/pds.3537
21. Neligan A, Bell GS, Johnson AL, et al. The long-term risk of premature mortality in people with epilepsy. *Brain* 2011;134(Pt 2):388-95. doi: 10.1093/brain/awq378
22. Lhatoo SD, Johnson AL, Goodridge DM, et al. Mortality in epilepsy in the first 11 to 14 years after diagnosis: multivariate analysis of a long-term, prospective, population-based cohort. *Ann Neurol* 2001;49(3):336-44. [published Online First: 2001/03/23]
23. Sen A, Jette N, Husain M, et al. Epilepsy in older people. *Lancet* 2020;395(10225):735-48. doi: 10.1016/S0140-6736(19)33064-8
24. Sen A, Capelli V, Husain M. Cognition and dementia in older patients with epilepsy. *Brain* 2018;141(6):1592-608. doi: <http://dx.doi.org/10.1093/brain/awy022>
25. Johnston A, Smith P. Epilepsy in the older patient. *Reviews in Clinical Gerontology* 2007;17(2):109-18. doi: <http://dx.doi.org/10.1017/S0959259808002414>
26. Devinsky O, Hesdorffer DC, Thurman DJ, et al. Sudden unexpected death in epilepsy: epidemiology, mechanisms, and prevention. *Lancet Neurology* 2016;15(10):1075-88.
27. Rafnsson V, Olafsson E, Hauser WA, et al. Cause-specific mortality in adults with unprovoked seizures - A population-based incidence cohort study. *Neuroepidemiology* 2001;20(4):232-36. doi: 10.1159/000054795
28. Blank LJ, Acton EK, Willis AW. Predictors of mortality in older adults with epilepsy: Implications for learning health systems. *Neurology* 2020 doi: 10.1212/WNL.0000000000011079
29. Lip GY, Brodie MJ. Sudden death in epilepsy: an avoidable outcome? *J R Soc Med* 1992;85(10):609-11.
30. Faught E, Duh MS, Weiner JR, et al. Nonadherence to antiepileptic drugs and increased mortality. *Findings from the RANSOM Study* 2008;71(20):1572-78. doi: 10.1212/01.wnl.0000319693.10338.b9
31. McKinlay A, Morgan M, Noble A, et al. Patient views on use of emergency and alternative care services for adult epilepsy: A qualitative study. *Seizure* 2020;80:56-62. doi: 10.1016/j.seizure.2020.04.011
32. Noble AJ, Morgan M, Viridi C, et al. A nurse-led self-management intervention for people who attend emergency departments with epilepsy: the patients' view. *J Neurol* 2013;260(4):1022-30. doi: 10.1007/s00415-012-6749-2
33. Shohet C, Yelloly J, Bingham P, et al. The association between the quality of epilepsy management in primary care, general practice population deprivation status and epilepsy-related emergency hospitalisations. *Seizure* 2007;16(4):351-5. doi: 10.1016/j.seizure.2007.02.005
34. Dixon PA, Kirkham JJ, Marson AG, et al. National Audit of Seizure management in Hospitals (NASH): Results of the national audit of adult epilepsy in the UK. *BMJ Open* 2015;5 (3) (no pagination)(e007325) doi: <http://dx.doi.org/10.1136/bmjopen-2014-007325>
35. Wojewodka G, McKinlay A, Ridsdale L. Best care for older people with epilepsy: A scoping review. *Seizure* 2021;85:70-89. doi: 10.1016/j.seizure.2020.12.007 [published Online First: 2021/01/16]
36. Tellez-Zenteno JF, Patten SB, Jetté N, et al. Psychiatric comorbidity in epilepsy: a population-based analysis. *Epilepsia* 2007;48(12):2336-44. doi: 10.1111/j.1528-1167.2007.01222.x [published Online First: 2007/07/31]
37. Scott AJ, Sharpe L, Hunt C, et al. Anxiety and depressive disorders in people with epilepsy: A meta-analysis. *Epilepsia* 2017;58(6):973-82. doi: 10.1111/epi.13769
38. Ridsdale L, Wojewodka G, Robinson E, et al. Characteristics associated with quality of life among people with drug-resistant epilepsy. *Journal of Neurology* 2017;264(6):1174-84. doi: 10.1007/s00415-017-8512-1

- 1  
2  
3 39. Dilorio C, Shafer PO, Letz R, et al. Behavioral, social, and affective factors associated with self-  
4 efficacy for self-management among people with epilepsy. *Epilepsy Behav* 2006;9(1):158-63.  
5 doi: 10.1016/j.yebeh.2006.05.001  
6  
7 40. Neurological Alliance. Parity of Esteem. UK, 2017.  
8 41. Trinka E, Hofler J, Zerbs A. Causes of status epilepticus. *Epilepsia* 2012;53 Suppl 4:127-38. doi:  
9 10.1111/j.1528-1167.2012.03622.x  
10 42. Tan M, Wilson I, Braganza V, et al. Development and validation of an epidemiologic case  
11 definition of epilepsy for use with routinely collected Australian health data. *Epilepsy Behav*  
12 2015;51:65-72. doi: 10.1016/j.yebeh.2015.06.031 [published Online First: 2015/08/12]  
13 43. Marston L, Carpenter JR, Walters KR, et al. Issues in multiple imputation of missing data for large  
14 general practice clinical databases. *Pharmacoepidemiol Drug Saf* 2010;19(6):618-26. doi:  
15 10.1002/pds.1934 [published Online First: 2010/03/23]  
16 44. Steele AJ, Denaxas SC, Shah AD, et al. Machine learning models in electronic health records can  
17 outperform conventional survival models for predicting patient mortality in coronary artery  
18 disease. *PLoS One* 2018;13(8):e0202344. doi: 10.1371/journal.pone.0202344 [published  
19 Online First: 2018/09/01]  
20 45. Dunn N, Holmes C, Mullee M. Does lithium therapy protect against the onset of dementia?  
21 *Alzheimer Dis Assoc Disord* 2005;19(1):20-2. doi: 10.1097/01.wad.0000155068.23937.9b  
22 [published Online First: 2005/03/15]  
23 46. Khan NF, Harrison SE, Rose PW. Validity of diagnostic coding within the General Practice  
24 Research Database: a systematic review. *Br J Gen Pract* 2010;60(572):e128-36. doi:  
25 10.3399/bjgp10X483562 [published Online First: 2010/03/06]  
26 47. Jick H, Jick SS, Derby LE. Validation of information recorded on general practitioner based  
27 computerised data resource in the United Kingdom. *Bmj* 1991;302(6779):766-8. doi:  
28 10.1136/bmj.302.6779.766 [published Online First: 1991/03/30]  
29 48. Health and Social Care Information Centre. National Quality and Outcomes Framework Statistics  
30 for England 2004/05: Health and Social Care Information Centre, 2005.  
31 49. Prescribing and Primary Care Services HaSCIC. Quality and Outcomes Framework – Prevalence,  
32 Achievements and Exceptions Report. England 2013-2014., 2014.  
33 50. Hanna NJ, Black M, Sander JWS, et al. The National Sentinel Clinical Audit of Epilepsy-Related  
34 Death: Epilepsy – death in the shadows, 2002.  
35 51. Kim AS, Moffatt E, Ursell PC, et al. Sudden neurologic death masquerading as out-of-hospital  
36 sudden cardiac death. *Neurology* 2016;87(16):1669-73. doi:  
37 10.1212/wnl.0000000000003238 [published Online First: 2016/10/19]  
38  
39  
40  
41  
42  
43  
44  
45  
46  
47  
48  
49  
50  
51  
52  
53  
54  
55  
56  
57  
58  
59  
60

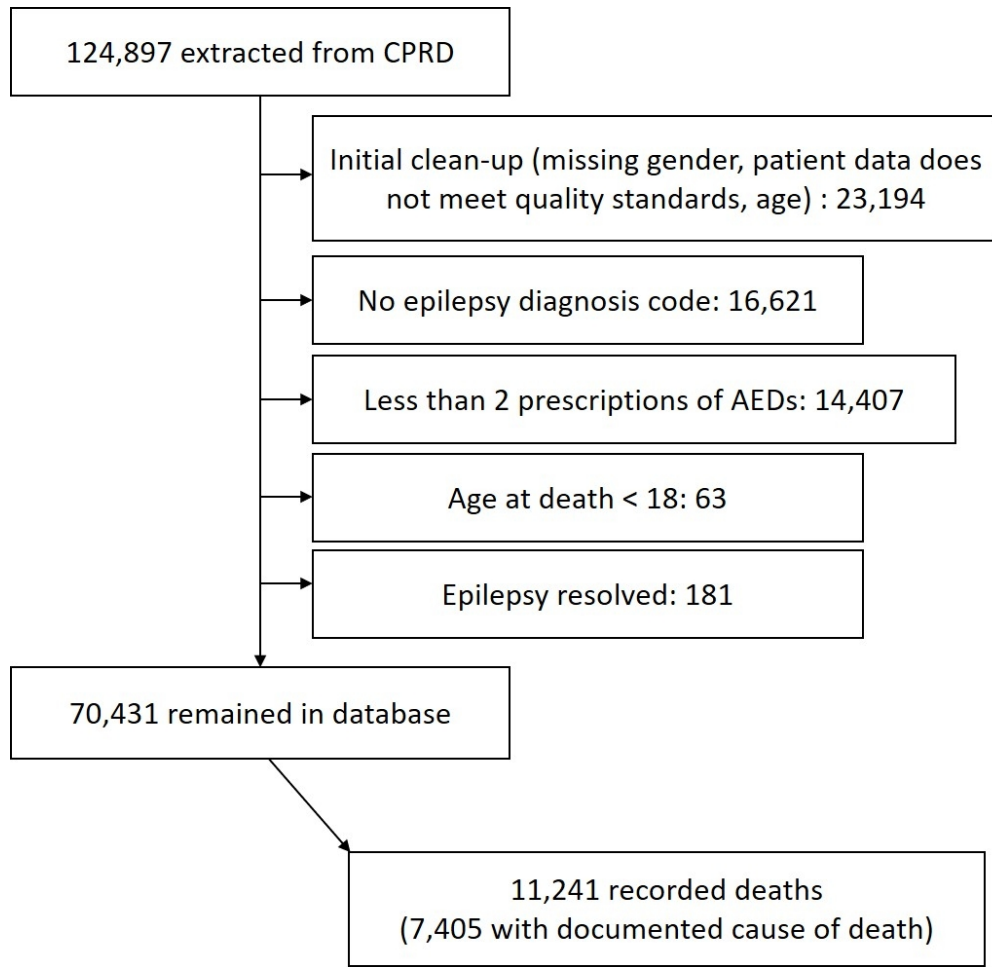

Figure 1. Flowchart of participant selection

173x167mm (150 x 150 DPI)

## SUPPLEMENTAL FILE 1

## Codes used to identify epilepsy in the CPRD

Table S1. Codes used to identify epilepsy in the CPRD

| medcode | readcode | readterm                                              |
|---------|----------|-------------------------------------------------------|
| 573     | F25..00  | Epilepsy                                              |
| 85113   | F250 A   |                                                       |
| 11186   | F250.00  | Generalised nonconvulsive epilepsy                    |
| 2907    | F250000  | Petit mal (minor) epilepsy                            |
| 1715    | F250011  | Epileptic absences                                    |
| 24309   | F250200  | Epileptic seizures - atonic                           |
| 31830   | F250300  | Epileptic seizures - akinetic                         |
| 34792   | F250500  | Lennox-Gastaut syndrome                               |
| 59185   | F250y00  | Other specified generalised nonconvulsive epilepsy    |
| 44252   | F250z00  | Generalised nonconvulsive epilepsy NOS                |
| 26144   | F251.00  | Generalised convulsive epilepsy                       |
| 95216   | F2510    |                                                       |
| 988     | F251000  | Grand mal (major) epilepsy                            |
| 22804   | F251011  | Tonic-clonic epilepsy                                 |
| 49340   | F251111  | Otohara syndrome                                      |
| 18471   | F251200  | Epileptic seizures - clonic                           |
| 4801    | F251300  | Epileptic seizures - myoclonic                        |
| 5152    | F251400  | Epileptic seizures - tonic                            |
| 8187    | F251500  | Tonic-clonic epilepsy                                 |
| 45927   | F251y00  | Other specified generalised convulsive epilepsy       |
| 40806   | F251z00  | Generalised convulsive epilepsy NOS                   |
| 9886    | F252.00  | Petit mal status                                      |
| 5117    | F253.00  | Grand mal status                                      |
| 4093    | F253.11  | Status epilepticus                                    |
| 32288   | F254.00  | Partial epilepsy with impairment of consciousness     |
| 3175    | F254000  | Temporal lobe epilepsy                                |
| 23634   | F254100  | Psychomotor epilepsy                                  |
| 36203   | F254200  | Psychosensory epilepsy                                |
| 55665   | F254300  | Limbic system epilepsy                                |
| 34079   | F254400  | Epileptic automatism                                  |
| 11394   | F254500  | Complex partial epileptic seizure                     |
| 31920   | F254z00  | Partial epilepsy with impairment of consciousness NOS |
| 26015   | F255.00  | Partial epilepsy without impairment of consciousness  |
| 9569    | F255000  | Jacksonian, focal or motor epilepsy                   |
| 5525    | F255011  | Focal epilepsy                                        |
| 65699   | F255012  | Motor epilepsy                                        |

|        |         |                                                                  |
|--------|---------|------------------------------------------------------------------|
| 48134  | F255100 | Sensory induced epilepsy                                         |
| 73542  | F255300 | Visceral reflex epilepsy                                         |
| 98870  | F255311 | Partial epilepsy with autonomic symptoms                         |
| 55739  | F255400 | Visual reflex epilepsy                                           |
| 68946  | F255500 | Unilateral epilepsy                                              |
| 40105  | F255600 | Simple partial epileptic seizure                                 |
| 26733  | F255y00 | Partial epilepsy without impairment of consciousness OS          |
| 27526  | F255z00 | Partial epilepsy without impairment of consciousness NOS         |
| 71719  | F257.00 | Kojevnikov's epilepsy                                            |
| 30604  | F25B.00 | Alcohol-induced epilepsy                                         |
| 30816  | F25C.00 | Drug-induced epilepsy                                            |
| 56359  | F25D.00 | Menstrual epilepsy                                               |
| 65673  | F25E.00 | Stress-induced epilepsy                                          |
| 30635  | F25F.00 | Photosensitive epilepsy                                          |
| 106571 | F25H.00 | Generalised seizure                                              |
| 6271   | F25X.00 | Status epilepticus, unspecified                                  |
| 38307  | F25y.00 | Other forms of epilepsy                                          |
| 55260  | F25y000 | Cursive (running) epilepsy                                       |
| 53483  | F25y100 | Gelastic epilepsy                                                |
| 9887   | F25y200 | Local (focal) (partial) idiopathic epileptic seizure local onset |
| 25330  | F25y300 | Complex partial status epilepticus                               |
| 96641  | F25y500 | Panayiotopoulos syndrome                                         |
| 9979   | F25yz00 | Other forms of epilepsy NOS                                      |
| 9747   | F25z.00 | Epilepsy NOS                                                     |
| 3607   | F25z.11 | Fit (in known epileptic) NOS                                     |
| 99731  | Fyu5000 | [X]Other generalized epilepsy and epileptic syndromes            |
| 69831  | Fyu5100 | [X]Other epilepsy                                                |
| 59120  | Fyu5200 | [X]Other status epilepticus                                      |
| 71801  | Fyu5900 | [X]Status epilepticus, unspecified                               |
| 4109   | SC20000 | Traumatic epilepsy                                               |
| 37644  | F132100 | Progressive myoclonic epilepsy                                   |

### Definition of variables

Lists of Medcodes and corresponding Read codes used for each variable can be found in Supplemental file 2. An initial list of Read codes was created for each variable, either based on previous research or by searching specific words in a Read code browser. Medcodes were matched to the Read code list using the CPRD Medical Dictionary. An additional search of the Medcodes was conducted to ensure all appropriate codes were used. Medcodes were used during the analysis in STATA as these are numeric codes. For variables using medication data, lists of prodcodes were generated by searching the CPRD product code list, which lists prodcodes against British National Formulary (BNF) information.



- **Age:** For cases: age = year of death – year of birth. For matched controls: age = year of death of the matched case – year of birth.

For epilepsy related factors (ie. Relating to seizures and treatment) and lifestyle factors, data from the CPRD was used from the date of death of the matched case up to 12 months prior. These variables are listed below:

- **Emergency department visit or emergency admission:** Emergency admissions or visits to emergency centres were identified from “Clinical data” from CPRD. These included keywords: seen by emergency clinician, in accident and emergency, emergency admission. A full list is available in Supplemental File 2.
- **Number of antiepileptic drugs (AEDs):** Number of different types of AEDs prescribed in 12 months were grouped into categories: 0, 1, 2, 3 and “4 or more”. Product codes (“Prodcodes”) were used from “Therapy data” to identify AEDs in the CPRD. A full list of Prodcodes and corresponding definitions is available in Supplemental File 2.
- **Status epilepticus:** recorded status epilepticus code in previous 12 months (medcode: 4093; readcode: F253.11) clinical CPRD data.<sup>1</sup>
- **Depression:** the variable was coded as either a documented diagnostic medcode related to “depression” from “Clinical data” or a prescription of antidepressants from “Therapy data” in the previous 12 months.<sup>1</sup> Antidepressants were identified through their product codes (prodcode) from therapy data. A list of medcodes for depression and prodcodes for antidepressants can be found in Supplemental File 2.
- **Smoking status:** Data was coded from medcodes related to smoking or smoking cessation interventions from “Clinical data” and overall smoking status if available in the CPRD “Additional Files”. For any patients that did not have a smoking status recording in the 12-month data period, the last known recording from clinical data was used, as previously described by Booth et al.<sup>2</sup> The list of medcodes and readcodes used to identify smoking status can be found in Supplemental File 2.
- **Injury:** any injury documented in “Clinical data” was used. A list of medcodes from clinical CPRD data included: injuries, fractures, dislocations, burns, bruising, contusions, lacerations, abrasions, concussions and wounds.<sup>1</sup> A full list of medcodes and corresponding Read codes can be found in Supplemental File 2.
- **Seizure freedom:** recoded seizure freedom for > 12 months (medcode: 11015; readcode: 667F.00) in “Clinical data” from CPRD.<sup>1</sup>

**For co-morbidity, data coded for patient’s lifetime (within start and end dates with acceptable quality data recording):**

- **Dementia:** code list included any medcodes for “dementia” and “Alzheimer’s” in patient history from “Clinical data” in the CPRD. The list of medcodes and corresponding Read codes can be found in Supplemental File 2.



1  
2  
3  
4  
5  
6  
7  
8  
9  
10  
11  
12  
13  
14  
15  
16  
17  
18  
19  
20  
21  
22  
23  
24  
25  
26  
27  
28  
29  
30  
31  
32  
33  
34  
35  
36  
37  
38  
39  
40  
41  
42  
43  
44  
45  
46  
47  
48  
49  
50  
51  
52  
53  
54  
55  
56  
57  
58  
59  
60

- **Stroke:** code list included stroke, cerebral ischemia/arterial occlusion/haemorrhage/infarction. embolism in patient history from “Clinical data” in the CPRD. The list of medcodes and corresponding Read codes can be found in Supplemental File 2.

For peer review only

**Table S2.** Main cause of death of PWE registered in the CPRD between 2005 – 2013 by year

| ICD-10 category (ICD-10 code)                                                                     | 2005 (%)   | 2006 (%)   | 2007 (%)   | 2008 (%)   | 2009 (%)   | 2010 (%)   | 2011 (%)   | 2012 (%)   | 2013 (%)   |
|---------------------------------------------------------------------------------------------------|------------|------------|------------|------------|------------|------------|------------|------------|------------|
| Epilepsy (G40-G41)                                                                                | 6.3        | 6.3        | 5.9        | 6.1        | 5.7        | 6.2        | 5.2        | 7.1        | 5.2        |
| Certain infectious and parasitic diseases (A00-B99)                                               | 1.0        | 1.6        | 1.1        | 1.0        | 0.7        | 0.9        | 0.5        | 1.2        | 0.5        |
| Neoplasms (C00-D48)                                                                               | 20.9       | 19.4       | 17.6       | 19.6       | 19.0       | 18.1       | 21.8       | 21.4       | 20.9       |
| Diseases of the blood and blood-forming organs (D50-D89)                                          | 0.6        | 0.0        | 0.4        | 0.3        | 0.1        | 0.0        | 0.2        | 0.3        | 0.3        |
| Endocrine, nutritional and metabolic diseases (E00-E90)                                           | 1.5        | 1.7        | 1.7        | 1.1        | 1.6        | 1.7        | 1.1        | 1.0        | 1.1        |
| Mental and behavioural disorders (F00-F99)                                                        | 4.6        | 3.8        | 5.8        | 5.0        | 6.6        | 4.5        | 10.7       | 10.9       | 10.5       |
| Diseases of the nervous system (G00-G37, G43-G99)                                                 | 4.6        | 5.1        | 5.1        | 6.0        | 7.5        | 5.5        | 7.3        | 5.6        | 7.2        |
| Diseases of the circulatory system (I00-I99)                                                      | 33.8       | 35.1       | 34.0       | 34.0       | 31.3       | 33.1       | 28.3       | 26.8       | 28.1       |
| Diseases of the respiratory system (J00-J99)                                                      | 12.9       | 16.3       | 14.7       | 13.6       | 13.0       | 14.5       | 12.6       | 12.7       | 12.5       |
| Diseases of the digestive system (K00-KK93)                                                       | 3.8        | 3.3        | 4.3        | 4.6        | 4.1        | 4.8        | 4.9        | 4.9        | 5.0        |
| Diseases of the skin and subcutaneous tissue (L00-L99)                                            | 0.0        | 0.1        | 0.5        | 0.3        | 0.4        | 0.3        | 0.1        | 0.0        | 0.1        |
| Diseases of the musculoskeletal system and connective tissue (M00-M99)                            | 0.4        | 0.0        | 0.8        | 0.3        | 1.2        | 0.2        | 0.7        | 0.4        | 0.8        |
| Diseases of the genitourinary system (N00-N99)                                                    | 2.9        | 2.5        | 2.4        | 1.8        | 2.8        | 3.1        | 0.7        | 2.1        | 1.2        |
| Congenital malformations, deformations and chromosomal abnormalities (Q00-Q99)                    | 1.5        | 1.5        | 1.1        | 1.5        | 1.6        | 0.9        | 0.8        | 0.8        | 1.1        |
| Symptoms, signs and abnormal clinical and laboratory findings, not elsewhere classified (R00-R99) | 1.5        | 1.3        | 1.8        | 1.7        | 1.0        | 2.3        | 1.7        | 1.8        | 1.0        |
| External causes of morbidity and mortality (V01-X59, X85-Y98)                                     | 3.3        | 1.6        | 2.6        | 2.8        | 3.1        | 3.1        | 3.2        | 2.6        | 3.5        |
| External causes of morbidity and mortality (intentional) (X60-X84)                                | 0.4        | 0.4        | 0.1        | 0.4        | 0.4        | 0.8        | 0.2        | 0.3        | 1.0        |
| <b>Total (n)</b>                                                                                  | <b>521</b> | <b>687</b> | <b>761</b> | <b>785</b> | <b>836</b> | <b>874</b> | <b>886</b> | <b>956</b> | <b>987</b> |

## References

1. Ridsdale L, Charlton J, Ashworth M, et al. Epilepsy mortality and risk factors for death in epilepsy: a population-based study. *Br J Gen Pract* 2011;61(586):e271-8. doi: 10.3399/bjgp11X572463
2. Booth HP, Prevost AT, Gulliford MC. Validity of smoking prevalence estimates from primary care electronic health records compared with national population survey data for England, 2007 to 2011. *Pharmacoepidemiol Drug Saf* 2013;22(12):1357-61. doi: 10.1002/pds.3537

For peer review only

**medcode readcode**

1  
2  
3 33707 E00..00  
4 1916 E00..11  
5 1350 E00..12  
6 7323 E000.00  
7  
8 15165 E001.00  
9 42602 E001000  
10 49513 E001100  
11 30032 E001200  
12 27677 E001300  
13 38438 E001z00  
14 44674 E002.00  
15 18386 E002000  
16 21887 E002100  
17 41089 E002z00  
18 37015 E003.00  
19 7664 Eu00.00  
20 49263 Eu00000  
21 25704 Eu00011  
22 60059 Eu00012  
23 61528 Eu00013  
24 38678 Eu00100  
25 46762 Eu00111  
26 11379 Eu00112  
27 43346 Eu00113  
28 30706 Eu00200  
29 29386 Eu00z00  
30 4693 Eu02z00  
31 48501 Eu02z11  
32 4357 Eu02z14  
33 5931 1461  
34 104155 1JA2.00  
35 1917 F110.00  
36 16797 F110000  
37 32057 F110100  
38 92341 R20z.00  
39  
40  
41  
42  
43  
44  
45  
46  
47  
48  
49  
50  
51  
52  
53  
54  
55  
56  
57  
58  
59  
60

1  
2 **readterm**  
3 Senile and presenile organic psychotic conditions  
4 Senile dementia  
5 Senile/presenile dementia  
6 Uncomplicated senile dementia  
7 Presenile dementia  
8 Uncomplicated presenile dementia  
9 Presenile dementia with delirium  
10 Presenile dementia with paranoia  
11 Presenile dementia with depression  
12 Presenile dementia NOS  
13 Senile dementia with depressive or paranoid features  
14 Senile dementia with paranoia  
15 Senile dementia with depression  
16 Senile dementia with depressive or paranoid features NOS  
17 Senile dementia with delirium  
18 [X]Dementia in Alzheimer's disease  
19 [X]Dementia in Alzheimer's disease with early onset  
20 [X]Presenile dementia,Alzheimer's type  
21 [X]Primary degen dementia, Alzheimer's type, presenile onset  
22 [X]Alzheimer's disease type 2  
23 [X]Dementia in Alzheimer's disease with late onset  
24 [X]Alzheimer's disease type 1  
25 [X]Senile dementia,Alzheimer's type  
26 [X]Primary degen dementia of Alzheimer's type, senile onset  
27 [X]Dementia in Alzheimer's dis, atypical or mixed type  
28 [X]Dementia in Alzheimer's disease, unspecified  
29 [X] Unspecified dementia  
30 [X] Presenile dementia NOS  
31 [X] Senile dementia NOS  
32 H/O: dementia  
33 Suspected dementia  
34 Alzheimer's disease  
35 Alzheimer's disease with early onset  
36 Alzheimer's disease with late onset  
37 [D]Senility, without psychosis NOS  
38  
39  
40  
41  
42  
43  
44  
45  
46  
47  
48  
49  
50  
51  
52  
53  
54  
55  
56  
57  
58  
59  
60

1  
2 **medcode readcode**  
3 23671 G63y000  
4 24446 G63y100  
5 71585 G63z.00  
6 8837 G64..00  
7 5363 G64..11  
8 569 G64..12  
9 6155 G64..13  
10 16517 G640.00  
11 36717 G640000  
12 15019 G641.00  
13 34758 G641.11  
14 27975 G641000  
15 3149 G64z.00  
16 15252 G64z.11  
17 5602 G64z.12  
18 25615 G64z000  
19 39693 G31y200  
20 504 G65..00  
21 1895 G65z.00  
22 15788 G65zz00  
23 16507 G65z100  
24 24385 G671100  
25 66873 14AK.00  
26 102554 1JA1011  
27 5871 14A7.12  
28 6253 G66..12  
29 18604 G61..12  
30 9985 G64z200  
31 10504 G64z300  
32 26424 G64z400  
33 1433 G65..12  
34 19354 G65y.00  
35 1469 G66..00  
36 1298 G66..11  
37 6116 G66..13  
38 8443 G663.00  
39 17322 G664.00  
40 7780 G667.00  
41 12833 G668.00  
42 39403 G683.00  
43 44740 G680.00  
44 48149 G681.00  
45 43451 G682.00  
46 51138 G68W.00  
47 6228 G68X.00  
48 40758 G6W..00  
49 33543 G6X..00  
50 57495 G63..11  
51 2418 G6...00

1  
2 1786 G60..00  
3 29939 G600.00  
4 56007 G601.00  
5 19412 G602.00  
6 42331 G603.00  
7 9696 G604.00  
8 41910 G605.00  
9 60692 G606.00  
10 17326 G60X.00  
11 23580 G60z.00  
12 5051 G61..00  
13 6960 G61..11  
14 31595 G610.00  
15 40338 G611.00  
16 46316 G612.00  
17 13564 G613.00  
18 7912 G614.00  
19 62342 G615.00  
20 30045 G616.00  
21 30202 G617.00  
22 57315 G618.00  
23 107440 G619.00  
24 31060 G61X.00  
25 28314 G61X000  
26 19201 G61X100  
27 3535 G61z.00  
28 31805 G62..00  
29 36178 G620.00  
30 4273 G621.00  
31 17734 G622.00  
32 18912 G623.00  
33 20284 G62z.00  
34  
35  
36  
37  
38  
39  
40  
41  
42  
43  
44  
45  
46  
47  
48  
49  
50  
51  
52  
53  
54  
55  
56  
57  
58  
59  
60

For peer review only



**readterm**

1  
2  
3 Cerebral infarct due to thrombosis of precerebral arteries  
4 Cerebral infarction due to embolism of precerebral arteries  
5 Precerebral artery occlusion NOS  
6 Cerebral arterial occlusion  
7 CVA - cerebral artery occlusion  
8 Infarction - cerebral  
9 Stroke due to cerebral arterial occlusion  
10 Cerebral thrombosis  
11 Cerebral infarction due to thrombosis of cerebral arteries  
12 Cerebral embolism  
13 Cerebral embolus  
14 Cerebral infarction due to embolism of cerebral arteries  
15 Cerebral infarction NOS  
16 Brainstem infarction NOS  
17 Cerebellar infarction  
18 Brainstem infarction  
19 Subendocardial ischaemia  
20 Transient cerebral ischaemia  
21 Transient cerebral ischaemia NOS  
22 Transient cerebral ischaemia NOS  
23 Intermittent cerebral ischaemia  
24 Chronic cerebral ischaemia  
25 H/O: Stroke in last year  
26 Suspected stroke  
27 H/O: stroke  
28 Stroke unspecified  
29 Stroke due to intracerebral haemorrhage  
30 Left sided cerebral infarction  
31 Right sided cerebral infarction  
32 Infarction of basal ganglia  
33 Transient ischaemic attack  
34 Other transient cerebral ischaemia  
35 Stroke and cerebrovascular accident unspecified  
36 CVA unspecified  
37 CVA - Cerebrovascular accident unspecified  
38 Brain stem stroke syndrome  
39 Cerebellar stroke syndrome  
40 Left sided CVA  
41 Right sided CVA  
42 Sequelae of cerebral infarction  
43 Sequelae of subarachnoid haemorrhage  
44 Sequelae of intracerebral haemorrhage  
45 Sequelae of other nontraumatic intracranial haemorrhage  
46 Sequelae/other + unspecified cerebrovascular diseases  
47 Sequelae of stroke,not specfd as h'morrhage or infarction  
48 Cereb infarct due unsp occlus/stenos precerebr arteries  
49 Cerebrl infarctn due/unspcf occlusn or sten/cerebrl artr  
50 Infarction - precerebral  
51 Cerebrovascular disease  
52  
53  
54  
55  
56  
57  
58  
59  
60

1 Subarachnoid haemorrhage  
2 Ruptured berry aneurysm  
3 Subarachnoid haemorrhage from carotid siphon and bifurcation  
4 Subarachnoid haemorrhage from middle cerebral artery  
5 Subarachnoid haemorrhage from anterior communicating artery  
6 Subarachnoid haemorrhage from posterior communicating artery  
7 Subarachnoid haemorrhage from basilar artery  
8 Subarachnoid haemorrhage from vertebral artery  
9 Subarachnoid haemorrh from intracranial artery, unspecif  
10 Subarachnoid haemorrhage NOS  
11 Intracerebral haemorrhage  
12 CVA - cerebrovascular accid due to intracerebral haemorrhage  
13 Cortical haemorrhage  
14 Internal capsule haemorrhage  
15 Basal nucleus haemorrhage  
16 Cerebellar haemorrhage  
17 Pontine haemorrhage  
18 Bulbar haemorrhage  
19 External capsule haemorrhage  
20 Intracerebral haemorrhage, intraventricular  
21 Intracerebral haemorrhage, multiple localized  
22 Lobar cerebral haemorrhage  
23 Intracerebral haemorrhage in hemisphere, unspecified  
24 Left sided intracerebral haemorrhage, unspecified  
25 Right sided intracerebral haemorrhage, unspecified  
26 Intracerebral haemorrhage NOS  
27 Other and unspecified intracranial haemorrhage  
28 Extradural haemorrhage - nontraumatic  
29 Subdural haemorrhage - nontraumatic  
30 Subdural haematoma - nontraumatic  
31 Subdural haemorrhage NOS  
32 Intracranial haemorrhage NOS  
33  
34  
35  
36  
37  
38  
39  
40  
41  
42  
43  
44  
45  
46  
47  
48  
49  
50  
51  
52  
53  
54  
55  
56  
57  
58  
59  
60

| medcode | readcode | readterm                                                   |
|---------|----------|------------------------------------------------------------|
| 16632   | E291.00  | Prolonged depressive reaction                              |
| 15099   | E113.00  | Recurrent major depressive episode                         |
| 10610   | E112.00  | Single major depressive episode                            |
| 11717   | Eu32000  | [X]Mild depressive episode                                 |
| 15219   | E112300  | Single major depressive episode, severe, without psychosis |
| 10438   | 1B1U.11  | Depressive symptoms                                        |
| 6546    | E112.12  | Endogenous depression first episode                        |
| 595     | E112.14  | Endogenous depression                                      |
| 14709   | E113200  | Recurrent major depressive episodes, moderate              |
| 6950    | E112.13  | Endogenous depression first episode                        |
| 6932    | E113.11  | Endogenous depression - recurrent                          |
| 9667    | Eu32200  | [X]Severe depressive episode without psychotic symptoms    |
| 5879    | E112.11  | Agitated depression                                        |
| 4323    | E2B1.00  | Chronic depression                                         |
| 11913   | Eu41200  | [X]Mixed anxiety and depressive disorder                   |
| 1908    | 2257     | O/E - depressed                                            |
| 1131    | E204.00  | Neurotic depression reactive type                          |
| 34390   | E112000  | Single major depressive episode, unspecified               |
| 543     | Eu32z11  | [X]Depression NOS                                          |
| 25697   | E113300  | Recurrent major depressive episodes, severe, no psychosis  |
| 2716    | 1465     | H/O: depression                                            |
| 16506   | E112100  | Single major depressive episode, mild                      |
| 7011    | E112z00  | Single major depressive episode NOS                        |
| 9211    | Eu32100  | [X]Moderate depressive episode                             |
| 6482    | E113700  | Recurrent depression                                       |
| 655     | E200300  | Anxiety with depression                                    |
| 25563   | E113z00  | Recurrent major depressive episode NOS                     |
| 8851    | Eu33.11  | [X]Recurrent episodes of depressive reaction               |
| 29342   | E113100  | Recurrent major depressive episodes, mild                  |
| 324     | E2B..00  | Depressive disorder NEC                                    |
| 15155   | E112200  | Single major depressive episode, moderate                  |
| 1055    | E135.00  | Agitated depression                                        |
| 10290   | Eu34112  | [X]Depressive personality disorder                         |
| 36246   | E290z00  | Brief depressive reaction NOS                              |
| 35671   | E113000  | Recurrent major depressive episodes, unspecified           |
| 107657  | 115X.00  | No history of depression                                   |

**prodcode productname**

40295 Valdoxan 25mg tablets (Servier Laboratories Ltd)  
40494 Agomelatine 25mg tablets  
182 Tryptizol 10mg/ml Injection (Merck Sharp & Dohme Ltd)  
19779 Amitriptyline 10mg/ml injection  
34503 Amitriptyline 25mg tablets (IVAX Pharmaceuticals UK Ltd)  
45233 Amitriptyline 10mg tablets (IVAX Pharmaceuticals UK Ltd)  
46970 Amitriptyline 50mg tablets (IVAX Pharmaceuticals UK Ltd)  
65439 Amitriptyline 25mg tablets (Sandoz Ltd)  
2525 Amitriptyline 75mg modified-release capsules  
3777 Amitriptyline 10mg/5ml sugar free oral solution  
7751 Tryptizol 25mg Tablet (Merck Sharp & Dohme Ltd)  
8332 Tryptizol 50mg Tablet (Merck Sharp & Dohme Ltd)  
8726 Tryptizol 10mg Tablet (Merck Sharp & Dohme Ltd)  
8831 Tryptizol mr 75mg Modified-release capsule (Merck Sharp & Dohme Ltd)  
8878 Tryptizol 10mg/5ml sugar free Oral solution (Merck Sharp and Dohme Ltd)  
20026 Domical 25mg Tablet (Berk Pharmaceuticals Ltd)  
22070 Amitriptyline 10mg/5ml Oral solution (Rosemont Pharmaceuticals Ltd)  
24680 Elavil 10mg Tablet (DDSA Pharmaceuticals Ltd)  
26213 Domical 10mg Tablet (Berk Pharmaceuticals Ltd)  
27008 Domical 50mg Tablet (Berk Pharmaceuticals Ltd)  
32439 Amitriptyline 25mg Tablet (Sussex Pharmaceutical Ltd)  
34197 Amitriptyline 25mg Tablet (Berk Pharmaceuticals Ltd)  
34474 Amitriptyline 25mg Tablet (Regent Laboratories Ltd)  
34916 Amitriptyline 10mg Tablet (Berk Pharmaceuticals Ltd)  
40396 Amitriptyline 50mg Tablet (Berk Pharmaceuticals Ltd)  
41729 Amitriptyline 25mg Tablet (Celltech Pharma Europe Ltd)  
42394 Amitriptyline 25mg Tablet (Crosspharma Ltd)  
45242 Amitriptyline 10mg Tablet (Sussex Pharmaceutical Ltd)  
48065 Amitriptyline oral solution  
49 Amitriptyline 25mg tablets  
83 Amitriptyline 10mg tablets  
1888 Amitriptyline 50mg tablets  
4690 Amitriptyline 50mg/5ml oral solution sugar free  
6312 Amitriptyline 25mg/5ml oral solution sugar free  
24134 Amitriptyline 25mg tablets (Kent Pharmaceuticals Ltd)  
24141 Amitriptyline 10mg tablets (Actavis UK Ltd)  
24145 Amitriptyline 25mg tablets (Actavis UK Ltd)  
24147 Amitriptyline 25mg tablets (Teva UK Ltd)  
24152 Amitriptyline 10mg tablets (Teva UK Ltd)  
33090 Amitriptyline 10mg tablets (A A H Pharmaceuticals Ltd)  
33624 Amitriptyline 50mg tablets (Teva UK Ltd)  
34107 Amitriptyline 50mg tablets (Wockhardt UK Ltd)  
34129 Amitriptyline 25mg tablets (Wockhardt UK Ltd)  
34182 Amitriptyline 50mg tablets (Kent Pharmaceuticals Ltd)  
34224 Amitriptyline 25mg/5ml oral solution sugar free (Rosemont Pharmaceuticals Ltd)  
34251 Amitriptyline 50mg/5ml oral solution sugar free (Rosemont Pharmaceuticals Ltd)  
34274 Amitriptyline 50mg tablets (A A H Pharmaceuticals Ltd)  
34401 Amitriptyline 10mg tablets (Wockhardt UK Ltd)  
34634 Amitriptyline 50mg tablets (Actavis UK Ltd)

1  
2 34731 Amitriptyline 10mg tablets (Kent Pharmaceuticals Ltd)  
3 34782 Amitriptyline 25mg tablets (A A H Pharmaceuticals Ltd)  
4 42078 Amitriptyline 25mg tablets (Almus Pharmaceuticals Ltd)  
5 46801 Amitriptyline 10mg/5ml oral solution  
6 46818 Amitriptyline 10mg/5ml oral suspension  
7  
8 52867 Amitriptyline 10mg tablets (Accord Healthcare Ltd)  
9 54877 Amitriptyline 25mg tablets (Accord Healthcare Ltd)  
10 55139 Amitriptyline 25mg tablets (Alliance Healthcare (Distribution) Ltd)  
11 55491 Amitriptyline 10mg tablets (Almus Pharmaceuticals Ltd)  
12 57107 Amitriptyline 10mg tablets (Phoenix Healthcare Distribution Ltd)  
13 57972 Amitriptyline 10mg tablets (Alliance Healthcare (Distribution) Ltd)  
14 59161 Amitriptyline 10mg tablets (Waymade Healthcare Plc)  
15 59820 Amitriptyline 50mg/5ml oral solution sugar free (Wockhardt UK Ltd)  
16 60355 Amitriptyline 25mg tablets (Phoenix Healthcare Distribution Ltd)  
17 60410 Amitriptyline 25mg/5ml oral solution sugar free (Wockhardt UK Ltd)  
18 61835 Amitriptyline 10mg tablets (DE Pharmaceuticals)  
19 64141 Amitriptyline 5mg/5ml oral solution  
20 64330 Amitriptyline 50mg tablets (Almus Pharmaceuticals Ltd)  
21 64647 Amitriptyline 25mg tablets (DE Pharmaceuticals)  
22 65879 Amitriptyline 10mg tablets (Sigma Pharmaceuticals Plc)  
23 65987 Amitriptyline 25mg tablets (Crescent Pharma Ltd)  
24 66572 Amitriptyline 25mg tablets (Sigma Pharmaceuticals Plc)  
25 66578 Amitriptyline 10mg tablets (Mawdsley-Brooks & Company Ltd)  
26 66579 Amitriptyline 25mg tablets (Mawdsley-Brooks & Company Ltd)  
27 11963 Limbitrol 10 Capsule (Roche Products Ltd)  
28 14534 Limbitrol 5 Capsule (Roche Products Ltd)  
29 18342 Amitriptyline 25mg / Chlordiazepoxide 10mg capsules  
30 21081 Amitriptyline 12.5mg / Chlordiazepoxide 5mg capsules  
31 595 Amitriptyline 25mg / Perphenazine 2mg tablets  
32 1208 Triptafen tablets (AMCo)  
33 3652 Amoxapine 100mg tablets  
34 4411 Amoxapine 150mg tablets  
35 14398 Asendis 50mg Tablet (Wyeth Pharmaceuticals)  
36 15380 Asendis 25mg Tablet (Wyeth Pharmaceuticals)  
37 17319 Amoxapine 25mg tablets  
38 21357 Asendis 100mg Tablet (Wyeth Pharmaceuticals)  
39 24723 Asendis 150mg Tablet (Wyeth Pharmaceuticals)  
40 8844 Tryptophan with ascorbic acid and pyridoxine powder  
41 12227 Butriptyline 25mg tablets  
42 18932 Evadyne 25mg Tablet (Wyeth Pharmaceuticals)  
43 32457 Butriptyline 50mg tablets  
44 67 Citalopram 20mg tablets  
45 476 Citalopram 10mg tablets  
46 1712 Cipramil 20mg tablets (Lundbeck Ltd)  
47 2408 Cipramil 40mg tablets (Lundbeck Ltd)  
48 3861 Cipramil 10mg tablets (Lundbeck Ltd)  
49 4770 Citalopram 40mg tablets  
50 26016 Citalopram 20mg tablets (Sandoz Ltd)  
51 29756 Paxoran 20mg Tablet (Ranbaxy (UK) Ltd)  
52 32546 Paxoran 10mg Tablet (Ranbaxy (UK) Ltd)

1  
2 32848 Citalopram 10mg tablets (Actavis UK Ltd)  
3 33720 Citalopram 10mg tablets (IVAX Pharmaceuticals UK Ltd)  
4 34356 Citalopram 20mg tablets (A A H Pharmaceuticals Ltd)  
5 34413 Citalopram 10mg tablets (Zentiva)  
6 34415 Citalopram 20mg tablets (Mylan Ltd)  
7 34436 Citalopram 10mg tablets (Mylan Ltd)  
8 34466 Citalopram 40mg tablets (Sandoz Ltd)  
9 34498 Citalopram 10mg Tablet (Neo Laboratories Ltd)  
10 34499 Citalopram 10mg tablets (Sandoz Ltd)  
11 34586 Citalopram 10mg tablets (A A H Pharmaceuticals Ltd)  
12 34603 Citalopram 40mg tablets (Mylan Ltd)  
13 34722 Citalopram 20mg Tablet (Neo Laboratories Ltd)  
14 34822 Citalopram 20mg tablets (Zentiva)  
15 34871 Citalopram 20mg tablets (Actavis UK Ltd)  
16 34966 Citalopram 20mg tablets (Teva UK Ltd)  
17 34970 Citalopram 20mg tablets (Niche Generics Ltd)  
18 36746 Citalopram 40mg tablets (A A H Pharmaceuticals Ltd)  
19 41528 Citalopram 10mg tablets (Teva UK Ltd)  
20 42660 Citalopram 10mg tablets (Almus Pharmaceuticals Ltd)  
21 43519 Citalopram 40mg Tablet (Neo Laboratories Ltd)  
22 45223 Citalopram 40mg tablets (Niche Generics Ltd)  
23 45286 Citalopram 10mg tablets (Niche Generics Ltd)  
24 45304 Citalopram 40mg tablets (Teva UK Ltd)  
25 46926 Citalopram 40mg tablets (Zentiva)  
26 46977 Citalopram 40mg tablets (Actavis UK Ltd)  
27 48026 Citalopram 20mg tablets (Almus Pharmaceuticals Ltd)  
28 49165 Citalopram 10mg tablets (Alliance Healthcare (Distribution) Ltd)  
29 52100 Citalopram 10mg tablets (Arrow Generics Ltd)  
30 52354 Citalopram 20mg tablets (DE Pharmaceuticals)  
31 52408 Citalopram 10mg tablets (Kent Pharmaceuticals Ltd)  
32 52607 Citalopram 20mg tablets (Bristol Laboratories Ltd)  
33 52824 Citalopram 10mg tablets (PLIVA Pharma Ltd)  
34 53394 Citalopram 20mg tablets (Alliance Healthcare (Distribution) Ltd)  
35 53787 Citalopram 10mg tablets (Bristol Laboratories Ltd)  
36 54827 Citalopram 10mg/5ml oral suspension  
37 55033 Citalopram 40mg tablets (DE Pharmaceuticals)  
38 56009 Citalopram 20mg tablets (Arrow Generics Ltd)  
39 56355 Citalopram 10mg tablets (Waymade Healthcare Plc)  
40 58476 Citalopram 20mg tablets (Aurobindo Pharma Ltd)  
41 59193 Citalopram 10mg tablets (Ranbaxy (UK) Ltd)  
42 59650 Citalopram 10mg tablets (Aurobindo Pharma Ltd)  
43 60568 Citalopram 20mg tablets (Waymade Healthcare Plc)  
44 60839 Citalopram 40mg tablets (Almus Pharmaceuticals Ltd)  
45 60888 Citalopram 10mg tablets (Sigma Pharmaceuticals Plc)  
46 63441 Citalopram 10mg tablets (Rivopharm (UK) Ltd)  
47 63953 Cipramil 20mg tablets (DE Pharmaceuticals)  
48 64423 Citalopram 10mg tablets (Accord Healthcare Ltd)  
49 513 Citalopram 40mg/ml oral drops sugar free  
50 815 Cipramil 40mg/ml drops (Lundbeck Ltd)  
51 56292 Citalopram 40mg/ml oral drops sugar free (Actavis UK Ltd)  
52  
53  
54  
55  
56  
57  
58  
59  
60



1  
2 57936 Citalopram 40mg/ml oral drops sugar free (A A H Pharmaceuticals Ltd)  
3 3194 Clomipramine 10mg capsules  
4 3657 Anafranil 25mg capsules (Novartis Pharmaceuticals UK Ltd)  
5 3670 Clomipramine 25mg capsules  
6 3925 Clomipramine 50mg capsules  
7 7515 Anafranil 10mg capsules (Novartis Pharmaceuticals UK Ltd)  
8 7693 Anafranil 50mg capsules (Novartis Pharmaceuticals UK Ltd)  
9 7894 Anafranil SR 75mg tablets (Novartis Pharmaceuticals UK Ltd)  
10 8661 Clomipramine 75mg modified-release tablets  
11 8719 Anafranil 25mg/5ml syrup (Novartis Pharmaceuticals UK Ltd)  
12 8720 Clomipramine 25mg/5ml oral solution  
13 34245 Clomipramine 25mg capsules (A A H Pharmaceuticals Ltd)  
14 34866 Clomipramine 10mg capsules (A A H Pharmaceuticals Ltd)  
15 38274 Clomipramine 50mg/5ml oral suspension  
16 41563 Clomipramine 25mg capsules (IVAX Pharmaceuticals UK Ltd)  
17 41597 Clomipramine 50mg capsules (IVAX Pharmaceuticals UK Ltd)  
18 41628 Clomipramine 10mg capsules (IVAX Pharmaceuticals UK Ltd)  
19 43561 Clomipramine 10mg capsules (Teva UK Ltd)  
20 45318 Clomipramine 50mg capsules (A A H Pharmaceuticals Ltd)  
21 45350 Clomipramine 25mg capsules (Teva UK Ltd)  
22 53161 Clomipramine 50mg/5ml oral solution  
23 53187 Clomipramine 50mg capsules (Kent Pharmaceuticals Ltd)  
24 62620 Clomipramine 10mg capsules (Mylan Ltd)  
25 64458 Clomipramine 25mg/5ml oral suspension  
26 65762 Clomipramine 25mg capsules (Waymade Healthcare Plc)  
27 65804 Clomipramine 50mg capsules (Teva UK Ltd)  
28 7979 Pertofran 25mg Tablet (Novartis Pharmaceuticals UK Ltd)  
29 7981 Desipramine 25mg tablets  
30 74 Dosulepin 75mg tablets  
31 84 Dosulepin 25mg capsules  
32 1169 Prothiaden 25mg capsules (Teofarma)  
33 1940 Dothapax 25 capsules (Ashbourne Pharmaceuticals Ltd)  
34 2320 Prothiaden 75mg tablets (Teofarma)  
35 6054 Dosulepin 25mg/5ml oral solution sugar free  
36 10948 Dosulepin 75mg/5ml oral solution sugar free  
37 15632 Dothapax 75 tablets (Ashbourne Pharmaceuticals Ltd)  
38 19168 Dosulepin 25mg/5ml mixture  
39 19186 Dosulepin 75mg tablets (Actavis UK Ltd)  
40 21157 Thaden 75mg tablets (Opus Pharmaceuticals Ltd)  
41 21819 Prepadine 75mg tablets (Teva UK Ltd)  
42 21820 Prepadine 25mg capsules (Teva UK Ltd)  
43 23426 Dosulepin 25mg capsules (A A H Pharmaceuticals Ltd)  
44 29875 Dosulepin 25mg capsules (Mylan Ltd)  
45 30376 Thaden 25mg capsules (Opus Pharmaceuticals Ltd)  
46 31824 Dosulepin 25mg capsules (IVAX Pharmaceuticals UK Ltd)  
47 31826 Dosulepin 75mg tablets (IVAX Pharmaceuticals UK Ltd)  
48 32121 Dosulepin 75mg tablets (A A H Pharmaceuticals Ltd)  
49 33164 Dosulepin 25mg capsules (Sandoz Ltd)  
50 34058 Dosulepin 75mg tablets (Teva UK Ltd)  
51 34223 Dosulepin 25mg capsules (Teva UK Ltd)  
52  
53  
54  
55  
56  
57  
58  
59  
60

1  
2 34525 Dosulepin 75mg tablets (Mylan Ltd)  
3 34641 Dosulepin 25mg capsules (Sovereign Medical Ltd)  
4 34643 Dosulepin 25mg capsules (Almus Pharmaceuticals Ltd)  
5 34745 Dosulepin 25mg capsules (Actavis UK Ltd)  
6 42734 Dosulepin 75mg tablets (Almus Pharmaceuticals Ltd)  
7 43024 Dosulepin 100mg/5ml oral solution  
8 44853 Dosulepin 25mg capsules (Kent Pharmaceuticals Ltd)  
9 45737 Dosulepin 25mg/5ml Oral solution (Rosemont Pharmaceuticals Ltd)  
10 50722 Dosulepin 25mg/5ml oral solution  
11 51758 Prothiaden 25mg capsules (Stephar (U.K.) Ltd)  
12 57926 Dosulepin 75mg/5ml oral solution  
13 62681 Dosulepin 75mg tablets (Sandoz Ltd)  
14 3554 Doxepin 25mg capsules  
15 3842 Doxepin 10mg capsules  
16 5073 Doxepin 50mg capsules  
17 7059 Doxepin 75mg capsules  
18 10413 Sinequan 10mg capsules (Pfizer Ltd)  
19 12125 Sinequan 50mg capsules (Pfizer Ltd)  
20 12129 Sinequan 25mg capsules (Pfizer Ltd)  
21 14519 Sinequan 75mg capsules (Pfizer Ltd)  
22 35258 Sinopin 25mg capsules (Marlborough Pharmaceuticals Ltd)  
23 35493 Sinopin 50mg capsules (Marlborough Pharmaceuticals Ltd)  
24 40777 Doxepin 25mg/5ml oral suspension  
25 6895 Duloxetine 60mg gastro-resistant capsules  
26 7122 Duloxetine 30mg gastro-resistant capsules  
27 13151 Cymbalta 30mg gastro-resistant capsules (Eli Lilly and Company Ltd)  
28 14849 Cymbalta 60mg gastro-resistant capsules (Eli Lilly and Company Ltd)  
29 51383 Duloxetine 60mg gastro-resistant capsules (Sigma Pharmaceuticals Plc)  
30 62688 Duloxetine 30mg gastro-resistant capsules (Sigma Pharmaceuticals Plc)  
31 63216 Cymbalta 60mg gastro-resistant capsules (Mawdsley-Brooks & Company Ltd)  
32 63370 Duloxetine 30mg gastro-resistant capsules (Mawdsley-Brooks & Company Ltd)  
33 65618 Duloxetine 30mg gastro-resistant capsules (A A H Pharmaceuticals Ltd)  
34 65809 Duloxetine 30mg gastro-resistant capsules (Actavis UK Ltd)  
35 66412 Duloxetine 30mg gastro-resistant capsules (DE Pharmaceuticals)  
36 63763 Duloxetine 60mg gastro-resistant capsules (A A H Pharmaceuticals Ltd)  
37 64442 Duloxetine 60mg gastro-resistant capsules (Teva UK Ltd)  
38 65888 Duloxetine 60mg gastro-resistant capsules (Actavis UK Ltd)  
39 65892 Duloxetine 60mg gastro-resistant capsules (Mawdsley-Brooks & Company Ltd)  
40 66405 Duloxetine 60mg gastro-resistant capsules (DE Pharmaceuticals)  
41 603 Escitalopram 10mg tablets  
42 648 CipraleX 10mg tablets (Lundbeck Ltd)  
43 785 CipraleX 5mg tablets (Lundbeck Ltd)  
44 6218 Escitalopram 20mg tablets  
45 6360 CipraleX 20mg tablets (Lundbeck Ltd)  
46 6405 Escitalopram 5mg tablets  
47 20152 Escitalopram 10mg/ml oral drops sugar free  
48 26056 CipraleX 10mg/ml oral drops (Lundbeck Ltd)  
49 40726 Escitalopram 20mg/ml oral drops sugar free  
50 41062 CipraleX 20mg/ml oral drops (Lundbeck Ltd)  
51 63916 Escitalopram 10mg tablets (Actavis UK Ltd)



1  
2 22 Fluoxetine 20mg capsules  
3 252 Prozac 20mg/5ml liquid (Eli Lilly and Company Ltd)  
4 418 Prozac 20mg capsules (Eli Lilly and Company Ltd)  
5 2548 Fluoxetine 20mg/5ml oral solution  
6  
7 4075 Fluoxetine 60mg capsules  
8 4907 Prozac 60mg capsules (Eli Lilly and Company Ltd)  
9 14740 Oxactin 20mg capsules (Discovery Pharmaceuticals)  
10 19183 Fluoxetine 20mg capsules (A A H Pharmaceuticals Ltd)  
11 19470 Fluoxetine 20mg capsules (Ranbaxy (UK) Ltd)  
12 29786 Ranflutin 20mg capsules (Ranbaxy (UK) Ltd)  
13 30258 Fluoxetine 20mg/5ml oral solution (Teva UK Ltd)  
14 33071 Felicium 20mg capsules (Opus Pharmaceuticals Ltd)  
15 33410 Fluoxetine 20mg capsules (Zentiva)  
16 33779 Proxit 20mg/5ml oral solution (Pinewood Healthcare)  
17 34202 Fluoxetine 20mg capsules (Genus Pharmaceuticals Ltd)  
18 34216 Fluoxetine 20mg/5ml oral solution (A A H Pharmaceuticals Ltd)  
19 34288 Fluoxetine 20mg capsules (Mylan Ltd)  
20 34294 Fluoxetine 20mg capsules (IVAX Pharmaceuticals UK Ltd)  
21 34456 Fluoxetine 20mg capsules (Teva UK Ltd)  
22 34849 Fluoxetine 20mg capsules (Tillomed Laboratories Ltd)  
23 34856 Fluoxetine 60mg capsules (Mylan Ltd)  
24 36893 Fluoxetine 20mg/5ml oral solution sugar free  
25 37256 Prozep 20mg/5ml oral solution (Chemidex Pharma Ltd)  
26 38890 Fluoxetine 20mg Capsule (Milpharm Ltd)  
27 42107 Fluoxetine 20mg capsules (Niche Generics Ltd)  
28 42499 Fluoxetine 10mg tablets  
29 42803 Fluoxetine 20mg/5ml oral solution (IVAX Pharmaceuticals UK Ltd)  
30 45224 Fluoxetine 20mg capsules (Sandoz Ltd)  
31 45247 Fluoxetine 20mg capsules (Fannin UK Ltd)  
32 45316 Fluoxetine 20mg capsules (Wockhardt UK Ltd)  
33 45329 Fluoxetine 20mg capsules (Actavis UK Ltd)  
34 48220 Prozac 20mg capsules (Lexon (UK) Ltd)  
35 57532 Prozac 20mg capsules (Waymade Healthcare Plc)  
36 59358 Fluoxetine 20mg capsules (Milpharm Ltd)  
37 60534 Fluoxetine 20mg dispersible tablets sugar free  
38 60619 Fluoxetine 20mg/5ml oral solution (Kent Pharmaceuticals Ltd)  
39 60962 Fluoxetine 20mg capsules (Alliance Healthcare (Distribution) Ltd)  
40 61335 Prozac 20mg capsules (Mawdsley-Brooks & Company Ltd)  
41 62155 Fluoxetine 20mg capsules (Phoenix Healthcare Distribution Ltd)  
42 62335 Olena 20mg dispersible tablets (AMCo)  
43 600 Flupentixol 1mg tablets  
44 2275 Flupentixol 500microgram tablets  
45 3951 Fluaxol 1mg tablets (Lundbeck Ltd)  
46 3953 Fluaxol 500microgram tablets (Lundbeck Ltd)  
47 50592 Fluaxol 1mg tablets (Sigma Pharmaceuticals Plc)  
48 59593 Fluaxol 500microgram tablets (Lexon (UK) Ltd)  
49 2290 Fluvoxamine 100mg tablets  
50 2880 Fluvoxamine 50mg tablets  
51 2897 Faverin 50mg tablets (BGP Products Ltd)  
52 12123 Faverin 100mg tablets (BGP Products Ltd)  
53  
54  
55  
56  
57  
58  
59  
60

1  
2 43518 Fluvoxamine 100mg tablets (IVAX Pharmaceuticals UK Ltd)  
3 44861 Fluvoxamine 100mg tablets (Actavis UK Ltd)  
4 48045 Fluvoxamine 100mg tablets (A A H Pharmaceuticals Ltd)  
5 7910 Tofranil 25mg tablets (Novartis Pharmaceuticals UK Ltd)  
6 2579 Tofranil 10mg Tablet (Novartis Pharmaceuticals UK Ltd)  
7  
8 33074 Praminiil 10mg Tablet (DDSA Pharmaceuticals Ltd)  
9 34872 Imipramine 25mg Tablet (C P Pharmaceuticals Ltd)  
10 1310 Imipramine 10mg tablets  
11 1809 Imipramine 25mg tablets  
12  
13 32863 Imipramine 10mg tablets (Teva UK Ltd)  
14 34222 Imipramine 10mg tablets (Actavis UK Ltd)  
15 34355 Imipramine 25mg tablets (Actavis UK Ltd)  
16 34813 Imipramine 25mg tablets (A A H Pharmaceuticals Ltd)  
17 41408 Imipramine 25mg tablets (Teva UK Ltd)  
18 41681 Imipramine 10mg tablets (A A H Pharmaceuticals Ltd)  
19 42247 Imipramine 25mg/5ml oral solution sugar free  
20 56501 Tofranil 25mg tablets (Lexon (UK) Ltd)  
21  
22 24700 Prondol 15mg Tablet (Wyeth Pharmaceuticals)  
23 27476 Iprindole hc 15mg  
24 27733 Iprindole hc 30mg  
25  
26 31672 Prondol 30mg Tablet (Wyeth Pharmaceuticals)  
27 114 Lofepamine 70mg tablets  
28 2093 Gamanil 70mg tablets (Merck Serono Ltd)  
29 4218 Lofepamine 70mg/5ml oral suspension sugar free  
30  
31 25444 Lomont 70mg/5ml oral suspension (Rosemont Pharmaceuticals Ltd)  
32 34046 Lofepamine 70mg tablets (A A H Pharmaceuticals Ltd)  
33 34578 Lofepamine 70mg tablets (IVAX Pharmaceuticals UK Ltd)  
34 34672 Lofepamine 70mg tablets (Sterwin Medicines)  
35 34950 Lofepamine 70mg tablets (Actavis UK Ltd)  
36 41627 Lofepamine 70mg Tablet (Teva UK Ltd)  
37 43534 Lofepamine 70mg/5ml Oral suspension (Rosemont Pharmaceuticals Ltd)  
38 56229 Lofepamine 70mg/5ml oral solution  
39 56703 Lofepamine 70mg tablets (Sandoz Ltd)  
40 58450 Fepapax 70mg tablets (Ashbourne Pharmaceuticals Ltd)  
41 60591 Lofepamine 70mg tablets (Teva UK Ltd)  
42 66100 Lofepamine 70mg tablets (DE Pharmaceuticals)  
43 3083 Mianserin 10mg tablets  
44 6255 Mianserin 30mg tablets  
45 7468 Bolvidon 10mg Tablet (Organon Laboratories Ltd)  
46 8144 Bolvidon 20mg Tablet (Organon Laboratories Ltd)  
47 8585 Bolvidon 30mg Tablet (Organon Laboratories Ltd)  
48  
49 11956 Norval 20mg Tablet (Bencard)  
50 12192 Norval 30mg Tablet (Bencard)  
51 12368 Norval 10mg Tablet (Bencard)  
52  
53 47363 Mianserin 20mg Tablet (Berk Pharmaceuticals Ltd)  
54 742 Mirtazapine 30mg tablets  
55 4726 Zispin 30mg tablets (Organon Laboratories Ltd)  
56 6421 Mirtazapine 15mg orodispersible tablets  
57 6481 Mirtazapine 45mg orodispersible tablets  
58 6488 Mirtazapine 30mg orodispersible tablets  
59  
60

1 6795 Mirtazapine 15mg tablets  
2 6846 Zispin SolTab 15mg orodispersible tablets (Merck Sharp & Dohme Ltd)  
3 6854 Mirtazapine 45mg tablets  
4 10083 Zispin SolTab 30mg orodispersible tablets (Merck Sharp & Dohme Ltd)  
5 15268 Zispin SolTab 45mg orodispersible tablets (Merck Sharp & Dohme Ltd)  
6 16154 Mirtazapine 15mg/ml oral solution sugar free  
7 33337 Mirtazapine 45mg tablets (A A H Pharmaceuticals Ltd)  
8 40160 Mirtazapine 30mg tablets (Actavis UK Ltd)  
9 43234 Mirtazapine 45mg orodispersible tablets (Teva UK Ltd)  
10 43235 Mirtazapine 45mg orodispersible tablets (A A H Pharmaceuticals Ltd)  
11 43236 Mirtazapine 45mg orodispersible tablets (Actavis UK Ltd)  
12 43237 Mirtazapine 15mg orodispersible tablets (Teva UK Ltd)  
13 43239 Mirtazapine 15mg tablets (A A H Pharmaceuticals Ltd)  
14 43241 Mirtazapine 15mg orodispersible tablets (Aurobindo Pharma Ltd)  
15 43242 Mirtazapine 15mg tablets (Genus Pharmaceuticals Ltd)  
16 43246 Mirtazapine 15mg orodispersible tablets (Genus Pharmaceuticals Ltd)  
17 43247 Mirtazapine 45mg orodispersible tablets (Genus Pharmaceuticals Ltd)  
18 43248 Mirtazapine 15mg orodispersible tablets (Focus Pharmaceuticals Ltd)  
19 43250 Mirtazapine 30mg orodispersible tablets (A A H Pharmaceuticals Ltd)  
20 43253 Mirtazapine 15mg orodispersible tablets (A A H Pharmaceuticals Ltd)  
21 43256 Mirtazapine 45mg orodispersible tablets (Focus Pharmaceuticals Ltd)  
22 43257 Mirtazapine 15mg tablets (Teva UK Ltd)  
23 46668 Mirtazapine 15mg tablets (Arrow Generics Ltd)  
24 47945 Mirtazapine 30mg tablets (A A H Pharmaceuticals Ltd)  
25 47966 Mirtazapine 15mg/ml oral solution sugar free (Rosemont Pharmaceuticals Ltd)  
26 50892 Zispin SolTab 15mg orodispersible tablets (Necessity Supplies Ltd)  
27 53321 Mirtazapine 15mg/ml oral solution sugar free (A A H Pharmaceuticals Ltd)  
28 53543 Zispin SolTab 30mg orodispersible tablets (Necessity Supplies Ltd)  
29 53648 Mirtazapine 30mg orodispersible tablets (Actavis UK Ltd)  
30 53699 Mirtazapine 15mg tablets (Actavis UK Ltd)  
31 54342 Mirtazapine 15mg tablets (Medreich Plc)  
32 54644 Mirtazapine 15mg tablets (Pfizer Ltd)  
33 54792 Mirtazapine 30mg tablets (Alliance Healthcare (Distribution) Ltd)  
34 55482 Mirtazapine 15mg orodispersible tablets (Mylan Ltd)  
35 56209 Mirtazapine 30mg tablets (Phoenix Healthcare Distribution Ltd)  
36 58291 Mirtazapine 15mg orodispersible tablets (Pfizer Ltd)  
37 58625 Mirtazapine 45mg tablets (Actavis UK Ltd)  
38 59694 Mirtazapine 30mg orodispersible tablets (Phoenix Healthcare Distribution Ltd)  
39 59953 Mirtazapine 15mg tablets (Almus Pharmaceuticals Ltd)  
40 59954 Mirtazapine 45mg tablets (Almus Pharmaceuticals Ltd)  
41 60370 Zispin SolTab 15mg orodispersible tablets (Mawdsley-Brooks & Company Ltd)  
42 60538 Mirtazapine 30mg tablets (DE Pharmaceuticals)  
43 61547 Mirtazapine 15mg/ml oral solution sugar free (DE Pharmaceuticals)  
44 61856 Mirtazapine 15mg orodispersible tablets (Consilient Health Ltd)  
45 63403 Mirtazapine 30mg tablets (Teva UK Ltd)  
46 64101 Mirtazapine 15mg orodispersible tablets (Actavis UK Ltd)  
47 64139 Mirtazapine 45mg orodispersible tablets (Mylan Ltd)  
48 64223 Mirtazapine 45mg tablets (Teva UK Ltd)  
49 65555 Mirtazapine 15mg orodispersible tablets (Sigma Pharmaceuticals Plc)  
50 66183 Mirtazapine 15mg tablets (Alliance Healthcare (Distribution) Ltd)

1  
2 66580 Mirtazapine 15mg orodispersible tablets (Bluefish Pharmaceuticals AB)  
3 9534 Nefazodone Starter pack  
4 3391 Dutonin 100mg tablets (Bristol-Myers Squibb Pharmaceuticals Ltd)  
5 4011 Nefazodone 200mg tablets  
6 4297 Dutonin 200mg tablets (Bristol-Myers Squibb Pharmaceuticals Ltd)  
7 4554 Nefazodone 100mg tablets  
8 3183 Nortriptyline 10mg tablets  
9 7677 Allegron 10mg tablets (King Pharmaceuticals Ltd)  
10 8640 Allegron 25mg tablets (King Pharmaceuticals Ltd)  
11 4118 Nortriptyline 10mg Capsule  
12 7678 Nortriptyline 25mg Capsule  
13 12353 Aventyl 25mg Capsule (Eli Lilly and Company Ltd)  
14 12549 Aventyl 10mg/5ml Liquid (Eli Lilly and Company Ltd)  
15 17183 Aventyl 10mg Capsule (Eli Lilly and Company Ltd)  
16 39145 Nortriptyline 10mg/5ml Liquid  
17 3903 Nortriptyline 25mg tablets  
18 48216 Nortriptyline 25mg tablets (A A H Pharmaceuticals Ltd)  
19 55970 Nortriptyline 10mg tablets (King Pharmaceuticals Ltd)  
20 63276 Nortriptyline 25mg tablets (Alliance Healthcare (Distribution) Ltd)  
21 65237 Nortriptyline 10mg tablets (A A H Pharmaceuticals Ltd)  
22 66201 Nortriptyline 25mg tablets (Sigma Pharmaceuticals Plc)  
23 20571 Fluphenazine with nortriptyline 500microgramswith10mg Tablet  
24 50 Paroxetine 20mg tablets  
25 527 Paroxetine 10mg/5ml oral suspension sugar free  
26 841 Seroxat 20mg tablets (GlaxoSmithKline UK Ltd)  
27 1397 Paroxetine 30mg tablets  
28 1575 Seroxat 30mg tablets (GlaxoSmithKline UK Ltd)  
29 3601 Seroxat 20mg/10ml liquid (GlaxoSmithKline UK Ltd)  
30 32899 Paroxetine 20mg tablets (Actavis UK Ltd)  
31 33978 Paroxetine 20mg tablets (Mylan Ltd)  
32 34351 Paroxetine 20mg tablets (IVAX Pharmaceuticals UK Ltd)  
33 34419 Paroxetine 20mg tablets (A A H Pharmaceuticals Ltd)  
34 34587 Paroxetine 30mg tablets (A A H Pharmaceuticals Ltd)  
35 35021 Paroxetine 10mg tablets  
36 35112 Seroxat 10mg tablets (GlaxoSmithKline UK Ltd)  
37 40165 Paroxetine 30mg tablets (Actavis UK Ltd)  
38 40892 Paroxetine 20mg tablets (Genus Pharmaceuticals Ltd)  
39 55023 Paroxetine 20mg tablets (Medreich Plc)  
40 55537 Seroxat 30mg tablets (Lexon (UK) Ltd)  
41 59288 Paroxetine 10mg tablets (Actavis UK Ltd)  
42 64785 Paroxetine 30mg tablets (Alliance Healthcare (Distribution) Ltd)  
43 66292 Seroxat 10mg tablets (Waymade Healthcare Plc)  
44 63069 Rewisca 75mg capsules (Consilient Health Ltd)  
45 63088 Rewisca 50mg capsules (Consilient Health Ltd)  
46 63089 Rewisca 300mg capsules (Consilient Health Ltd)  
47 63090 Rewisca 150mg capsules (Consilient Health Ltd)  
48 63091 Rewisca 100mg capsules (Consilient Health Ltd)  
49 63174 Rewisca 200mg capsules (Consilient Health Ltd)  
50 63300 Rewisca 25mg capsules (Consilient Health Ltd)  
51 63317 Rewisca 225mg capsules (Consilient Health Ltd)

1 63877 Pregabalin 50mg capsules (A A H Pharmaceuticals Ltd)  
2 63964 Alzain 25mg capsules (Dr Reddy's Laboratories (UK) Ltd)  
3 63965 Alzain 100mg capsules (Dr Reddy's Laboratories (UK) Ltd)  
4 64005 Pregabalin 100mg capsules (A A H Pharmaceuticals Ltd)  
5 64037 Alzain 300mg capsules (Dr Reddy's Laboratories (UK) Ltd)  
6 64038 Alzain 225mg capsules (Dr Reddy's Laboratories (UK) Ltd)  
7 64039 Alzain 150mg capsules (Dr Reddy's Laboratories (UK) Ltd)  
8 64040 Alzain 75mg capsules (Dr Reddy's Laboratories (UK) Ltd)  
9 64041 Alzain 50mg capsules (Dr Reddy's Laboratories (UK) Ltd)  
10 64042 Alzain 200mg capsules (Dr Reddy's Laboratories (UK) Ltd)  
11 65069 Pregabalin 75mg capsules (Teva UK Ltd)  
12 65073 Pregabalin 25mg capsules (Teva UK Ltd)  
13 65218 Lecaent 50mg capsules (Actavis UK Ltd)  
14 790 Pregabalin 25mg capsules  
15 819 Pregabalin 75mg capsules  
16 6631 Pregabalin 150mg capsules  
17 6936 Pregabalin 50mg capsules  
18 6949 Pregabalin 200mg capsules  
19 6999 Pregabalin 100mg capsules  
20 7005 Pregabalin 300mg capsules  
21 37801 Pregabalin 225mg capsules  
22 55972 Pregabalin 150mg/5ml oral solution  
23 60543 Pregabalin 75mg/5ml oral solution  
24 64285 Pregabalin 150mg/5ml oral suspension  
25 65606 Pregabalin 50mg capsules (Accord Healthcare Ltd)  
26 65787 Pregabalin 50mg capsules (Sandoz Ltd)  
27 66509 Pregabalin 75mg capsules (Zentiva)  
28 6584 Lyrica 75mg capsules (Pfizer Ltd)  
29 7208 Lyrica 100mg capsules (Pfizer Ltd)  
30 7209 Lyrica 50mg capsules (Pfizer Ltd)  
31 7394 Lyrica 200mg capsules (Pfizer Ltd)  
32 10189 Lyrica 300mg capsules (Pfizer Ltd)  
33 16509 Lyrica 150mg capsules (Pfizer Ltd)  
34 16542 Lyrica 25mg capsules (Pfizer Ltd)  
35 38293 Lyrica 225mg capsules (Pfizer Ltd)  
36 48253 Lyrica 150mg capsules (Lexon (UK) Ltd)  
37 52547 Lyrica 50mg capsules (Waymade Healthcare Plc)  
38 64497 Lyrica 75mg capsules (Waymade Healthcare Plc)  
39 64568 Lyrica 150mg capsules (Sigma Pharmaceuticals Plc)  
40 65863 Lyrica 75mg capsules (Stephar (U.K.) Ltd)  
41 60929 Protriptyline 5mg tablets  
42 7755 Concoridin 10 Tablet (Merck Sharp & Dohme Ltd)  
43 7756 Protriptyline 5mg tablet  
44 7816 Concoridin 5 Tablet (Merck Sharp & Dohme Ltd)  
45 11187 Protriptyline 10mg tablet  
46 2356 Reboxetine 4mg tablets  
47 15163 Edronax 4mg tablets (Pfizer Ltd)  
48 65771 Sertraline 200mg/5ml oral suspension (Special Order)  
49 488 Sertraline 50mg tablets  
50 727 Sertraline 100mg tablets  
51  
52  
53  
54  
55  
56  
57  
58  
59  
60



1  
2 1612 Lustral 50mg tablets (Pfizer Ltd)  
3 4352 Lustral 100mg tablets (Pfizer Ltd)  
4 7328 Sertraline 50mg/5ml oral suspension  
5 32401 Sertraline 50mg tablets (A A H Pharmaceuticals Ltd)  
6 42387 Sertraline 50mg tablets (Actavis UK Ltd)  
7 44944 Sertraline 100mg tablets (Teva UK Ltd)  
8 45915 Sertraline 50mg tablets (Almus Pharmaceuticals Ltd)  
9 49519 Sertraline 100mg/5ml oral suspension  
10 54826 Sertraline 150mg/5ml oral suspension  
11 54933 Sertraline 100mg tablets (PLIVA Pharma Ltd)  
12 55146 Sertraline 100mg tablets (A A H Pharmaceuticals Ltd)  
13 55488 Sertraline 50mg tablets (Teva UK Ltd)  
14 58664 Sertraline 50mg tablets (Mylan Ltd)  
15 58723 Sertraline 50mg tablets (Accord Healthcare Ltd)  
16 59600 Sertraline 100mg tablets (Almus Pharmaceuticals Ltd)  
17 61503 Sertraline 100mg tablets (Actavis UK Ltd)  
18 62692 Sertraline 100mg tablets (Bristol Laboratories Ltd)  
19 62693 Sertraline 50mg tablets (Bristol Laboratories Ltd)  
20 62819 Sertraline 12.5mg/5ml oral suspension  
21 62927 Sertraline 50mg tablets (Wockhardt UK Ltd)  
22 62950 Sertraline 100mg tablets (Accord Healthcare Ltd)  
23 63481 Sertraline 50mg tablets (Aurobindo Pharma Ltd)  
24 66413 Sertraline 100mg tablets (Ranbaxy (UK) Ltd)  
25 66560 Sertraline 100mg tablets (Mylan Ltd)  
26 1730 Trazodone 100mg capsules  
27 3355 Trazodone 50mg capsules  
28 4003 Molipaxin 150mg tablets (Zentiva)  
29 4020 Trazodone 150mg tablets  
30 4194 Molipaxin 100mg capsules (Zentiva)  
31 4874 Molipaxin 50mg capsules (Zentiva)  
32 6442 Trazodone 50mg/5ml oral solution sugar free  
33 8174 Molipaxin 50mg/5ml oral liquid (Sanofi)  
34 19181 Trazodone 100mg capsules (Mylan Ltd)  
35 29339 Trazodone 50mg capsules (Mylan Ltd)  
36 29857 Trazodone 150mg tablets (Teva UK Ltd)  
37 30983 Trazodone 150mg tablets (Mylan Ltd)  
38 34003 Trazodone 50mg capsules (A A H Pharmaceuticals Ltd)  
39 34421 Trazodone 50mg capsules (Zentiva)  
40 34470 Trazodone 150mg tablets (Zentiva)  
41 34580 Trazodone 100mg capsules (A A H Pharmaceuticals Ltd)  
42 41609 Trazodone 50mg capsules (Teva UK Ltd)  
43 41709 Trazodone 100mg capsules (Teva UK Ltd)  
44 41710 Trazodone 100mg capsules (Zentiva)  
45 55137 Trazodone 150mg/5ml oral suspension  
46 57226 Trazodone 25mg/5ml oral suspension  
47 59931 Trazodone 50mg/5ml oral solution sugar free (A A H Pharmaceuticals Ltd)  
48 61657 Trazodone 75mg/5ml oral solution  
49 65152 Trazodone 100mg/5ml oral solution  
50 2039 Trimipramine 25mg tablets  
51 2531 Surmontil 50mg capsules (Sanofi)

1 2532 Surmontil 25mg tablets (Sanofi)  
2 3196 Trimipramine 50mg capsules  
3 4310 Trimipramine 10mg tablets  
4 8928 Surmontil 10mg tablets (Sanofi)  
5 42228 Trimipramine 10mg tablets (A A H Pharmaceuticals Ltd)  
6 45226 Trimipramine 25mg tablets (A A H Pharmaceuticals Ltd)  
7 53808 Trimipramine 10mg tablets (Phoenix Healthcare Distribution Ltd)  
8 57978 Trimipramine 25mg tablets (Waymade Healthcare Plc)  
9 65445 Trimipramine 50mg capsules (A A H Pharmaceuticals Ltd)  
10 66493 Trimipramine 25mg/5ml oral suspension  
11 4422 Tryptophan 500mg tablets  
12 5611 Optimax 500mg tablets (Intrapharm Laboratories Ltd)  
13 12221 Pacitron 500mg Tablet (Rorer Pharmaceuticals Ltd)  
14 20504 Optimax wv Tablet (E. Merck)  
15 301 Venlafaxine 37.5mg tablets  
16 470 Venlafaxine 75mg modified-release capsules  
17 623 Efexor 37.5mg tablets (Wyeth Pharmaceuticals)  
18 1222 Venlafaxine 75mg tablets  
19 1474 Efexor XL 75mg capsules (Pfizer Ltd)  
20 2654 Venlafaxine 150mg modified-release capsules  
21 5710 Efexor XL 150mg capsules (Pfizer Ltd)  
22 9182 Efexor 75mg tablets (Wyeth Pharmaceuticals)  
23 13237 Venlafaxine 37.5mg/5ml oral suspension  
24 39359 Venlafaxine 75mg modified-release tablets  
25 39360 Venlafaxine 150mg modified-release tablets  
26 39770 Tifaxin XL 75mg capsules (Genus Pharmaceuticals Ltd)  
27 39809 Tifaxin XL 150mg capsules (Genus Pharmaceuticals Ltd)  
28 40048 ViePax XL 75mg tablets (Dexcel-Pharma Ltd)  
29 40049 ViePax XL 150mg tablets (Dexcel-Pharma Ltd)  
30 40054 Venlafaxine 225mg modified-release tablets  
31 40059 Venlalic XL 75mg tablets (DB Ashbourne Ltd)  
32 40062 Venlalic XL 150mg tablets (DB Ashbourne Ltd)  
33 40092 Vensir XL 150mg capsules (Morningside Healthcare Ltd)  
34 40277 Vensir XL 75mg capsules (Morningside Healthcare Ltd)  
35 40407 Venlalic XL 225mg tablets (DB Ashbourne Ltd)  
36 40514 Venaxx XL 150mg capsules (AMCo)  
37 40515 Venaxx XL 75mg capsules (AMCo)  
38 40517 Vexarin XL 150mg capsules (Mylan Ltd)  
39 40764 ViePax 37.5mg tablets (Dexcel-Pharma Ltd)  
40 40815 Tardcaps XL 75mg capsules (IXL Pharma Ltd)  
41 40817 Tardcaps XL 150mg capsules (IXL Pharma Ltd)  
42 40917 ViePax 75mg tablets (Dexcel-Pharma Ltd)  
43 41033 Rodomel XL 75mg capsules (Teva UK Ltd)  
44 41299 Politid XL 75mg capsules (Actavis UK Ltd)  
45 41314 Rodomel XL 150mg capsules (Teva UK Ltd)  
46 42600 Vexarin XL 75mg capsules (Mylan Ltd)  
47 43203 Venlafaxine 75mg modified-release capsules (Sandoz Ltd)  
48 43334 Venlafaxine 150mg modified-release capsules (Sandoz Ltd)  
49 43673 Politid XL 150mg capsules (Actavis UK Ltd)  
50 43968 Foraven XL 75mg capsules (Forum Products Ltd)

1  
2 44936 Venlaneo XL 150mg capsules (Kent Pharmaceuticals Ltd)  
3 44937 Venlaneo XL 75mg capsules (Kent Pharmaceuticals Ltd)  
4 45664 Depefex XL 150mg capsules (Chiesi Ltd)  
5 45806 Venlafaxine 37.5mg modified-release tablets  
6 45818 Venlalic XL 37.5mg tablets (DB Ashbourne Ltd)  
7 45959 Depefex XL 75mg capsules (Chiesi Ltd)  
8 48199 Ranfaxine XL 75mg capsules (Ranbaxy (UK) Ltd)  
9 49511 Venlablue XL 75mg capsules (Bluefish Pharmaceuticals AB)  
10 50081 Venlablue XL 150mg capsules (Bluefish Pharmaceuticals AB)  
11 50934 Venlafaxine 150mg/5ml oral solution  
12 51280 Efexor XL 150mg capsules (Waymade Healthcare Plc)  
13 51361 Venlafaxine 37.5mg tablets (Ranbaxy (UK) Ltd)  
14 52074 Alventa XL 75mg capsules (Consilient Health Ltd)  
15 52516 Alventa XL 150mg capsules (Consilient Health Ltd)  
16 52716 Tonpular XL 75mg capsules (Wockhardt UK Ltd)  
17 53326 Venlafaxine 75mg/5ml oral solution  
18 55424 Venlafaxine  
19 55501 Venlafaxine 150mg Modified-release capsule (Hillcross Pharmaceuticals Ltd)  
20 56457 Venlafaxine 75mg tablets (Teva UK Ltd)  
21 56662 Venlafaxine 37.5mg tablets (A A H Pharmaceuticals Ltd)  
22 57751 Tonpular XL 150mg capsules (Wockhardt UK Ltd)  
23 58726 Venladex XL 150mg tablets (Dexcel-Pharma Ltd)  
24 59035 Venlablue XL 37.5mg capsules (Bluefish Pharmaceuticals AB)  
25 59563 Venlafaxine 75mg modified-release capsules (Kent Pharmaceuticals Ltd)  
26 59753 Sunveniz XL 150mg tablets (Sun Pharmaceuticals UK Ltd)  
27 59923 Venlafaxine 37.5mg tablets (Bristol Laboratories Ltd)  
28 60449 Venlafaxine 75mg tablets (A A H Pharmaceuticals Ltd)  
29 60549 Venlafaxine 150mg modified-release capsules (Kent Pharmaceuticals Ltd)  
30 60843 Sunveniz XL 75mg tablets (Sun Pharmaceuticals UK Ltd)  
31 60895 Venlafaxine 37.5mg tablets (Teva UK Ltd)  
32 61236 Bonilux XL 150mg capsules (Sandoz Ltd)  
33 62734 Venlafaxine 150mg/5ml oral suspension  
34 63859 Venlafaxine 75mg tablets (Waymade Healthcare Plc)  
35 65738 Efexor 37.5mg tablets (Sigma Pharmaceuticals Plc)  
36 66437 Venlafaxine 75mg tablets (DE Pharmaceuticals)  
37 12111 Vivalan 50mg Tablet (AstraZeneca UK Ltd)  
38 12309 Viloxazine hcl 50mg tablets  
39 51227 Pregabalin 20mg/ml oral solution sugar free  
40 51924 Lyrica 20mg/ml oral solution (Pfizer Ltd)  
41 48698 Mirtazapine 15mg orodispersible tablets sugar free  
42 49820 Mirtazapine 45mg orodispersible tablets sugar free  
43 51699 Venlafaxine 37.5mg/5ml oral solution  
44 54012 Mirtazapine 15mg orodispersible tablets sugar free (Sandoz Ltd)  
45 54686 Tryptophan 500mg capsules  
46 54747 Optimax 500mg capsules (Intrapharm Laboratories Ltd)  
47 58681 Venladex XL 75mg tablets (Dexcel-Pharma Ltd)  
48 58837 Venlafaxine 37.5mg modified-release capsules  
49 63268 Venlafaxine 75mg/5ml oral suspension  
50 65482 Vortioxetine 5mg tablets  
51 65483 Vortioxetine 10mg tablets



1  
2 65666 Venlafaxine 225mg modified-release capsules  
3 65899 Efexor XL 225mg capsules (Pfizer Ltd)  
4 54081 Sertraline 25mg/5ml oral suspension  
5 60138 Fluoxetine 20mg orodispersible tablets sugar free  
6 55138 Trazodone 250mg/5ml oral solution  
7 61842 Trazodone 50mg/5ml oral solution  
8 65213 Trimipramine 50mg/5ml oral solution  
9 64000 Amitriptyline 10mg/5ml oral solution sugar free  
10  
11  
12  
13  
14  
15  
16  
17  
18  
19  
20  
21  
22  
23  
24  
25  
26  
27  
28  
29  
30  
31  
32  
33  
34  
35  
36  
37  
38  
39  
40  
41  
42  
43  
44  
45  
46  
47  
48  
49  
50  
51  
52  
53  
54  
55  
56  
57  
58  
59  
60

For peer review only

1  
2 **drugsubstance**  
3 Agomelatine  
4 Agomelatine  
5 Amitriptyline Hydrochloride  
6 Amitriptyline Hydrochloride  
7 Amitriptyline hydrochloride  
8 Amitriptyline hydrochloride  
9 Amitriptyline hydrochloride  
10 Amitriptyline hydrochloride  
11 Amitriptyline hydrochloride  
12 Amitriptyline Hydrochloride  
13 Amitriptyline Hydrochloride  
14 Amitriptyline hydrochloride  
15 Amitriptyline hydrochloride  
16 Amitriptyline hydrochloride  
17 Amitriptyline hydrochloride  
18 Amitriptyline Hydrochloride  
19 Amitriptyline Hydrochloride  
20 Amitriptyline Hydrochloride  
21 Amitriptyline hydrochloride  
22 Amitriptyline Hydrochloride  
23 Amitriptyline hydrochloride  
24 Amitriptyline hydrochloride  
25 Amitriptyline hydrochloride  
26 Amitriptyline hydrochloride  
27 Amitriptyline hydrochloride  
28 Amitriptyline hydrochloride  
29 Amitriptyline hydrochloride  
30 Amitriptyline hydrochloride  
31 Amitriptyline hydrochloride  
32 Amitriptyline hydrochloride  
33 Amitriptyline hydrochloride  
34 Amitriptyline hydrochloride  
35 Amitriptyline hydrochloride  
36 Amitriptyline Hydrochloride  
37 Amitriptyline hydrochloride  
38 Amitriptyline hydrochloride  
39 Amitriptyline hydrochloride  
40 Amitriptyline hydrochloride  
41 Amitriptyline hydrochloride  
42 Amitriptyline hydrochloride  
43 Amitriptyline hydrochloride  
44 Amitriptyline hydrochloride  
45 Amitriptyline hydrochloride  
46 Amitriptyline hydrochloride  
47 Amitriptyline hydrochloride  
48 Amitriptyline hydrochloride  
49 Amitriptyline hydrochloride  
50 Amitriptyline hydrochloride  
51 Amitriptyline hydrochloride  
52 Amitriptyline hydrochloride  
53 Amitriptyline hydrochloride  
54 Amitriptyline hydrochloride  
55 Amitriptyline hydrochloride  
56 Amitriptyline hydrochloride  
57 Amitriptyline hydrochloride  
58 Amitriptyline hydrochloride  
59 Amitriptyline hydrochloride  
60 Amitriptyline hydrochloride

1 Amitriptyline hydrochloride  
2 Amitriptyline hydrochloride  
3 Amitriptyline hydrochloride  
4 Amitriptyline hydrochloride  
5 Amitriptyline hydrochloride  
6 Amitriptyline hydrochloride  
7 Amitriptyline hydrochloride  
8 Amitriptyline hydrochloride  
9 Amitriptyline hydrochloride  
10 Amitriptyline hydrochloride  
11 Amitriptyline hydrochloride  
12 Amitriptyline hydrochloride  
13 Amitriptyline hydrochloride  
14 Amitriptyline hydrochloride  
15 Amitriptyline hydrochloride  
16 Amitriptyline hydrochloride  
17 Amitriptyline hydrochloride  
18 Amitriptyline hydrochloride  
19 Amitriptyline hydrochloride  
20 Amitriptyline hydrochloride  
21 Amitriptyline hydrochloride  
22 Amitriptyline hydrochloride  
23 Amitriptyline hydrochloride  
24 Amitriptyline hydrochloride  
25 Amitriptyline hydrochloride  
26 Amitriptyline hydrochloride  
27 Amitriptyline hydrochloride  
28 Amitriptyline hydrochloride  
29 Amitriptyline hydrochloride  
30 Amitriptyline hydrochloride  
31 Amitriptyline Hydrochloride/Chlordiazepoxide  
32 Amitriptyline Hydrochloride/Chlordiazepoxide  
33 Amitriptyline Hydrochloride/Chlordiazepoxide  
34 Amitriptyline Hydrochloride/Chlordiazepoxide  
35 Amitriptyline hydrochloride/Perphenazine  
36 Amitriptyline hydrochloride/Perphenazine  
37  
38 Amoxapine  
39 Amoxapine  
40 Amoxapine  
41 Amoxapine  
42 Amoxapine  
43 Amoxapine  
44 Amoxapine  
45 Amoxapine  
46 Ascorbic Acid/Tryptophan/Pyridoxine Hydrochloride  
47 Butriptyline Hydrochloride  
48 Butriptyline Hydrochloride  
49 Butriptyline Hydrochloride  
50  
51 Citalopram hydrobromide  
52 Citalopram hydrobromide  
53 Citalopram hydrobromide  
54 Citalopram hydrobromide  
55 Citalopram hydrobromide  
56 Citalopram hydrobromide  
57 Citalopram hydrobromide  
58 Citalopram hydrobromide  
59 Citalopram hydrobromide  
60 Citalopram hydrobromide

- 1 Citalopram hydrobromide
- 2 Citalopram hydrobromide
- 3 Citalopram hydrobromide
- 4 Citalopram hydrobromide
- 5 Citalopram hydrobromide
- 6 Citalopram hydrobromide
- 7 Citalopram hydrobromide
- 8 Citalopram hydrobromide
- 9 Citalopram hydrobromide
- 10 Citalopram hydrobromide
- 11 Citalopram hydrobromide
- 12 Citalopram hydrobromide
- 13 Citalopram hydrobromide
- 14 Citalopram hydrobromide
- 15 Citalopram hydrobromide
- 16 Citalopram hydrobromide
- 17 Citalopram hydrobromide
- 18 Citalopram hydrobromide
- 19 Citalopram hydrobromide
- 20 Citalopram hydrobromide
- 21 Citalopram hydrobromide
- 22 Citalopram hydrobromide
- 23 Citalopram hydrobromide
- 24 Citalopram hydrobromide
- 25 Citalopram hydrobromide
- 26 Citalopram hydrobromide
- 27 Citalopram hydrobromide
- 28 Citalopram hydrobromide
- 29 Citalopram hydrobromide
- 30 Citalopram hydrobromide
- 31 Citalopram hydrobromide
- 32 Citalopram hydrobromide
- 33 Citalopram hydrobromide
- 34 Citalopram hydrobromide
- 35 Citalopram hydrobromide
- 36 Citalopram hydrobromide
- 37 Citalopram hydrobromide
- 38 Citalopram hydrobromide
- 39 Citalopram hydrobromide
- 40 Citalopram hydrobromide
- 41 Citalopram hydrobromide
- 42 Citalopram hydrobromide
- 43 Citalopram hydrobromide
- 44 Citalopram hydrobromide
- 45 Citalopram hydrobromide
- 46 Citalopram hydrobromide
- 47 Citalopram hydrobromide
- 48 Citalopram hydrobromide
- 49 Citalopram hydrobromide
- 50 Citalopram hydrobromide
- 51 Citalopram hydrobromide
- 52 Citalopram hydrobromide
- 53 Citalopram hydrobromide
- 54 Citalopram hydrobromide
- 55 Citalopram hydrobromide
- 56 Citalopram hydrobromide
- 57 Citalopram hydrobromide
- 58 Citalopram hydrochloride
- 59 Citalopram hydrochloride
- 60 Citalopram hydrochloride

For peer review only

1 Citalopram hydrochloride  
2 Clomipramine hydrochloride  
3 Clomipramine hydrochloride  
4 Clomipramine hydrochloride  
5 Clomipramine hydrochloride  
6 Clomipramine hydrochloride  
7 Clomipramine hydrochloride  
8 Clomipramine hydrochloride  
9 Clomipramine hydrochloride  
10 Clomipramine hydrochloride  
11 Clomipramine hydrochloride  
12 Clomipramine hydrochloride  
13 Clomipramine hydrochloride  
14 Clomipramine hydrochloride  
15 Clomipramine hydrochloride  
16 Clomipramine hydrochloride  
17 Clomipramine hydrochloride  
18 Clomipramine hydrochloride  
19 Clomipramine hydrochloride  
20 Clomipramine hydrochloride  
21 Clomipramine hydrochloride  
22 Clomipramine hydrochloride  
23 Clomipramine hydrochloride  
24 Clomipramine hydrochloride  
25 Clomipramine hydrochloride  
26 Clomipramine hydrochloride  
27 Clomipramine hydrochloride  
28 Clomipramine hydrochloride  
29 Clomipramine hydrochloride  
30 Clomipramine hydrochloride  
31 Clomipramine hydrochloride  
32 Clomipramine hydrochloride  
33 Desipramine  
34 Desipramine  
35 Dosulepin hydrochloride  
36 Dosulepin hydrochloride  
37 Dosulepin hydrochloride  
38 Dosulepin hydrochloride  
39 Dosulepin hydrochloride  
40 Dosulepin hydrochloride  
41 Dosulepin Hydrochloride  
42 Dosulepin Hydrochloride  
43 Dosulepin hydrochloride  
44 Dosulepin Hydrochloride  
45 Dosulepin hydrochloride  
46 Dosulepin hydrochloride  
47 Dosulepin hydrochloride  
48 Dosulepin hydrochloride  
49 Dosulepin hydrochloride  
50 Dosulepin hydrochloride  
51 Dosulepin hydrochloride  
52 Dosulepin hydrochloride  
53 Dosulepin hydrochloride  
54 Dosulepin hydrochloride  
55 Dosulepin hydrochloride  
56 Dosulepin hydrochloride  
57 Dosulepin hydrochloride  
58 Dosulepin hydrochloride  
59 Dosulepin hydrochloride  
60 Dosulepin hydrochloride

1 Dosulepin hydrochloride  
2 Dosulepin hydrochloride  
3 Dosulepin hydrochloride  
4 Dosulepin hydrochloride  
5 Dosulepin hydrochloride  
6 Dosulepin hydrochloride  
7 Dosulepin hydrochloride  
8 Dosulepin hydrochloride  
9 Dosulepin hydrochloride  
10 Dosulepin Hydrochloride  
11 Dosulepin hydrochloride  
12 Dosulepin hydrochloride  
13 Dosulepin hydrochloride  
14 Dosulepin hydrochloride  
15 Dosulepin hydrochloride  
16 Doxepin hydrochloride  
17 Doxepin hydrochloride  
18 Doxepin hydrochloride  
19 Doxepin hydrochloride  
20 Doxepin hydrochloride  
21 Doxepin hydrochloride  
22 Doxepin hydrochloride  
23 Doxepin hydrochloride  
24 Doxepin hydrochloride  
25 Doxepin hydrochloride  
26 Doxepin hydrochloride  
27 Doxepin hydrochloride  
28 Doxepin Hydrochloride  
29 Duloxetine hydrochloride  
30 Duloxetine hydrochloride  
31 Duloxetine hydrochloride  
32 Duloxetine hydrochloride  
33 Duloxetine hydrochloride  
34 Duloxetine hydrochloride  
35 Duloxetine hydrochloride  
36 Duloxetine hydrochloride  
37 Duloxetine hydrochloride  
38 Duloxetine hydrochloride  
39 Duloxetine hydrochloride  
40 Duloxetine hydrochloride  
41 Duloxetine hydrochloride  
42 Duloxetine hydrochloride  
43 Duloxetine hydrochloride  
44 Duloxetine hydrochloride  
45 Duloxetine hydrochloride  
46 Duloxetine hydrochloride  
47 Duloxetine hydrochloride  
48 Duloxetine hydrochloride  
49 Escitalopram oxalate  
50 Escitalopram oxalate  
51 Escitalopram oxalate  
52 Escitalopram oxalate  
53 Escitalopram oxalate  
54 Escitalopram oxalate  
55 Escitalopram oxalate  
56 Escitalopram oxalate  
57 Escitalopram oxalate  
58 Escitalopram Oxalate  
59 Escitalopram Oxalate  
60 Escitalopram oxalate

1 Fluoxetine hydrochloride  
2 Fluoxetine hydrochloride  
3 Fluoxetine hydrochloride  
4 Fluoxetine hydrochloride  
5 Fluoxetine hydrochloride  
6 Fluoxetine hydrochloride  
7 Fluoxetine hydrochloride  
8 Fluoxetine hydrochloride  
9 Fluoxetine hydrochloride  
10 Fluoxetine hydrochloride  
11 Fluoxetine hydrochloride  
12 Fluoxetine hydrochloride  
13 Fluoxetine hydrochloride  
14 Fluoxetine hydrochloride  
15 Fluoxetine hydrochloride  
16 Fluoxetine hydrochloride  
17 Fluoxetine hydrochloride  
18 Fluoxetine hydrochloride  
19 Fluoxetine hydrochloride  
20 Fluoxetine hydrochloride  
21 Fluoxetine hydrochloride  
22 Fluoxetine hydrochloride  
23 Fluoxetine hydrochloride  
24 Fluoxetine hydrochloride  
25 Fluoxetine hydrochloride  
26 Fluoxetine hydrochloride  
27 Fluoxetine hydrochloride  
28 Fluoxetine hydrochloride  
29 Fluoxetine hydrochloride  
30 Fluoxetine hydrochloride  
31 Fluoxetine hydrochloride  
32 Fluoxetine hydrochloride  
33 Fluoxetine hydrochloride  
34 Fluoxetine hydrochloride  
35 Fluoxetine hydrochloride  
36 Fluoxetine hydrochloride  
37 Fluoxetine hydrochloride  
38 Fluoxetine hydrochloride  
39 Fluoxetine hydrochloride  
40 Fluoxetine hydrochloride  
41 Fluoxetine hydrochloride  
42 Fluoxetine hydrochloride  
43 Fluoxetine hydrochloride  
44 Fluoxetine hydrochloride  
45 Fluoxetine hydrochloride  
46 Fluoxetine hydrochloride  
47 Fluoxetine hydrochloride  
48 Fluoxetine hydrochloride  
49 Fluoxetine hydrochloride  
50 Flupentixol dihydrochloride  
51 Flupentixol dihydrochloride  
52 Flupentixol dihydrochloride  
53 Flupentixol dihydrochloride  
54 Flupentixol dihydrochloride  
55 Flupentixol dihydrochloride  
56 Flupentixol dihydrochloride  
57 Fluvoxamine maleate  
58 Fluvoxamine maleate  
59 Fluvoxamine maleate  
60 Fluvoxamine maleate



1  
2 Fluvoxamine maleate  
3 Fluvoxamine maleate  
4 Fluvoxamine maleate  
5 Imipramine hydrochloride  
6 Imipramine hydrochloride  
7 Imipramine hydrochloride  
8 Imipramine hydrochloride  
9 Imipramine hydrochloride  
10 Imipramine hydrochloride  
11 Imipramine hydrochloride  
12 Imipramine hydrochloride  
13 Imipramine hydrochloride  
14 Imipramine hydrochloride  
15 Imipramine hydrochloride  
16 Imipramine hydrochloride  
17 Imipramine hydrochloride  
18 Imipramine hydrochloride  
19 Imipramine hydrochloride  
20 Imipramine hydrochloride  
21 Imipramine hydrochloride  
22 Iprindole  
23 Iprindole  
24 Iprindole  
25 Iprindole  
26 Iprindole  
27 Lofepramine hydrochloride  
28 Lofepramine hydrochloride  
29 Lofepramine hydrochloride  
30 Lofepramine hydrochloride  
31 Lofepramine hydrochloride  
32 Lofepramine hydrochloride  
33 Lofepramine hydrochloride  
34 Lofepramine hydrochloride  
35 Lofepramine hydrochloride  
36 Lofepramine hydrochloride  
37 Lofepramine hydrochloride  
38 Lofepramine hydrochloride  
39 Lofepramine hydrochloride  
40 Lofepramine hydrochloride  
41 Lofepramine hydrochloride  
42 Lofepramine hydrochloride  
43 Lofepramine hydrochloride  
44 Lofepramine hydrochloride  
45 Mianserin hydrochloride  
46 Mianserin hydrochloride  
47 Mianserin hydrochloride  
48 Mianserin hydrochloride  
49 Mianserin hydrochloride  
50 Mianserin hydrochloride  
51 Mianserin hydrochloride  
52 Mianserin hydrochloride  
53 Mianserin hydrochloride  
54 Mianserin hydrochloride  
55 Mianserin hydrochloride  
56 Mirtazapine  
57 Mirtazapine  
58 Mirtazapine  
59 Mirtazapine  
60 Mirtazapine

1 Mirtazapine  
2 Mirtazapine  
3 Mirtazapine  
4 Mirtazapine  
5 Mirtazapine  
6 Mirtazapine  
7 Mirtazapine  
8 Mirtazapine  
9 Mirtazapine  
10 Mirtazapine  
11 Mirtazapine  
12 Mirtazapine  
13 Mirtazapine  
14 Mirtazapine  
15 Mirtazapine  
16 Mirtazapine  
17 Mirtazapine  
18 Mirtazapine  
19 Mirtazapine  
20 Mirtazapine  
21 Mirtazapine  
22 Mirtazapine  
23 Mirtazapine  
24 Mirtazapine  
25 Mirtazapine  
26 Mirtazapine  
27 Mirtazapine  
28 Mirtazapine  
29 Mirtazapine  
30 Mirtazapine  
31 Mirtazapine  
32 Mirtazapine  
33 Mirtazapine  
34 Mirtazapine  
35 Mirtazapine  
36 Mirtazapine  
37 Mirtazapine  
38 Mirtazapine  
39 Mirtazapine  
40 Mirtazapine  
41 Mirtazapine  
42 Mirtazapine  
43 Mirtazapine  
44 Mirtazapine  
45 Mirtazapine  
46 Mirtazapine  
47 Mirtazapine  
48 Mirtazapine  
49 Mirtazapine  
50 Mirtazapine  
51 Mirtazapine  
52 Mirtazapine  
53 Mirtazapine  
54 Mirtazapine  
55 Mirtazapine  
56 Mirtazapine  
57 Mirtazapine  
58 Mirtazapine  
59 Mirtazapine  
60 Mirtazapine

For peer review only

1 Mirtazapine  
2 Nefazodone Hydrochloride  
3 Nefazodone hydrochloride  
4 Nefazodone hydrochloride  
5 Nefazodone hydrochloride  
6 Nefazodone hydrochloride  
7 Nefazodone hydrochloride  
8 Nortriptyline hydrochloride  
9 Nortriptyline hydrochloride  
10 Nortriptyline hydrochloride  
11 Nortriptyline Hydrochloride  
12 Nortriptyline Hydrochloride  
13 Nortriptyline Hydrochloride  
14 Nortriptyline Hydrochloride  
15 Nortriptyline Hydrochloride  
16 Nortriptyline Hydrochloride  
17 Nortriptyline Hydrochloride  
18 Nortriptyline Hydrochloride  
19 Nortriptyline hydrochloride  
20 Nortriptyline hydrochloride  
21 Nortriptyline hydrochloride  
22 Nortriptyline hydrochloride  
23 Nortriptyline hydrochloride  
24 Nortriptyline hydrochloride  
25 Nortriptyline hydrochloride  
26 Nortriptyline hydrochloride  
27 Nortriptyline Hydrochloride/Fluphenazine Hydrochloride  
28 Paroxetine hydrochloride  
29 Paroxetine hydrochloride  
30 Paroxetine hydrochloride  
31 Paroxetine hydrochloride  
32 Paroxetine hydrochloride  
33 Paroxetine hydrochloride  
34 Paroxetine hydrochloride  
35 Paroxetine hydrochloride  
36 Paroxetine hydrochloride  
37 Paroxetine hydrochloride  
38 Paroxetine hydrochloride  
39 Paroxetine hydrochloride  
40 Paroxetine hydrochloride  
41 Paroxetine hydrochloride  
42 Paroxetine hydrochloride  
43 Paroxetine hydrochloride  
44 Paroxetine hydrochloride  
45 Paroxetine hydrochloride  
46 Paroxetine hydrochloride  
47 Paroxetine hydrochloride  
48 Paroxetine hydrochloride  
49 Paroxetine hydrochloride  
50 Paroxetine hydrochloride  
51 Paroxetine hydrochloride  
52 Pregabalin  
53 Pregabalin  
54 Pregabalin  
55 Pregabalin  
56 Pregabalin  
57 Pregabalin  
58 Pregabalin  
59 Pregabalin  
60 Pregabalin

1  
2 Pregabalin  
3 Pregabalin  
4 Pregabalin  
5 Pregabalin  
6 Pregabalin  
7 Pregabalin  
8 Pregabalin  
9 Pregabalin  
10 Pregabalin  
11 Pregabalin  
12 Pregabalin  
13 Pregabalin  
14 Pregabalin  
15 Pregabalin  
16 Pregabalin  
17 Pregabalin  
18 Pregabalin  
19 Pregabalin  
20 Pregabalin  
21 Pregabalin  
22 Pregabalin  
23 Pregabalin  
24 Pregabalin  
25 Pregabalin  
26 Pregabalin  
27 Pregabalin  
28 Pregabalin  
29 Pregabalin  
30 Pregabalin  
31 Pregabalin  
32 Pregabalin  
33 Pregabalin  
34 Pregabalin  
35 Pregabalin  
36 Pregabalin  
37 Pregabalin  
38 Pregabalin  
39 Pregabalin  
40 Pregabalin  
41 Pregabalin  
42 Pregabalin  
43 Pregabalin  
44 Pregabalin  
45 Pregabalin  
46 Pregabalin  
47 Pregabalin  
48 Pregabalin  
49 Pregabalin  
50 Protriptyline hydrochloride  
51 Protriptyline Hydrochloride  
52 Protriptyline Hydrochloride  
53 Protriptyline Hydrochloride  
54 Protriptyline Hydrochloride  
55 Protriptyline Hydrochloride  
56 Reboxetine mesilate  
57 Reboxetine mesilate  
58 Sertraline  
59 Sertraline hydrochloride  
60 Sertraline hydrochloride

- 1 Sertraline hydrochloride
- 2 Sertraline hydrochloride
- 3 Sertraline hydrochloride
- 4 Sertraline hydrochloride
- 5 Sertraline hydrochloride
- 6 Sertraline hydrochloride
- 7 Sertraline hydrochloride
- 8 Sertraline hydrochloride
- 9 Sertraline hydrochloride
- 10 Sertraline hydrochloride
- 11 Sertraline hydrochloride
- 12 Sertraline hydrochloride
- 13 Sertraline hydrochloride
- 14 Sertraline hydrochloride
- 15 Sertraline hydrochloride
- 16 Sertraline hydrochloride
- 17 Sertraline hydrochloride
- 18 Sertraline hydrochloride
- 19 Sertraline hydrochloride
- 20 Sertraline hydrochloride
- 21 Sertraline hydrochloride
- 22 Sertraline hydrochloride
- 23 Sertraline hydrochloride
- 24 Sertraline hydrochloride
- 25 Sertraline hydrochloride
- 26 Sertraline hydrochloride
- 27 Sertraline hydrochloride
- 28 Sertraline hydrochloride
- 29 Sertraline hydrochloride
- 30 Sertraline hydrochloride
- 31 Trazodone hydrochloride
- 32 Trazodone hydrochloride
- 33 Trazodone hydrochloride
- 34 Trazodone hydrochloride
- 35 Trazodone hydrochloride
- 36 Trazodone hydrochloride
- 37 Trazodone hydrochloride
- 38 Trazodone hydrochloride
- 39 Trazodone hydrochloride
- 40 Trazodone hydrochloride
- 41 Trazodone hydrochloride
- 42 Trazodone hydrochloride
- 43 Trazodone hydrochloride
- 44 Trazodone hydrochloride
- 45 Trazodone hydrochloride
- 46 Trazodone hydrochloride
- 47 Trazodone hydrochloride
- 48 Trazodone hydrochloride
- 49 Trazodone hydrochloride
- 50 Trazodone hydrochloride
- 51 Trazodone hydrochloride
- 52 Trazodone hydrochloride
- 53 Trazodone hydrochloride
- 54 Trazodone hydrochloride
- 55 Trazodone hydrochloride
- 56 Trazodone hydrochloride
- 57 Trazodone hydrochloride
- 58 Trazodone hydrochloride
- 59 Trimipramine maleate
- 60 Trimipramine maleate

For peer review only

1 Trimipramine maleate  
2 Trimipramine maleate  
3 Trimipramine maleate  
4 Trimipramine maleate  
5 Trimipramine maleate  
6 Trimipramine maleate  
7 Trimipramine maleate  
8 Trimipramine maleate  
9 Trimipramine maleate  
10 Trimipramine maleate  
11 Trimipramine maleate  
12 Trimipramine maleate  
13 Trimipramine maleate  
14 Tryptophan  
15 Tryptophan  
16 Tryptophan  
17 Tryptophan  
18 Venlafaxine hydrochloride  
19 Venlafaxine hydrochloride  
20 Venlafaxine hydrochloride  
21 Venlafaxine hydrochloride  
22 Venlafaxine hydrochloride  
23 Venlafaxine hydrochloride  
24 Venlafaxine hydrochloride  
25 Venlafaxine hydrochloride  
26 Venlafaxine hydrochloride  
27 Venlafaxine hydrochloride  
28 Venlafaxine hydrochloride  
29 Venlafaxine Hydrochloride  
30 Venlafaxine Hydrochloride  
31 Venlafaxine Hydrochloride  
32 Venlafaxine hydrochloride  
33 Venlafaxine hydrochloride  
34 Venlafaxine hydrochloride  
35 Venlafaxine hydrochloride  
36 Venlafaxine Hydrochloride  
37 Venlafaxine Hydrochloride  
38 Venlafaxine Hydrochloride  
39 Venlafaxine Hydrochloride  
40 Venlafaxine hydrochloride  
41 Venlafaxine hydrochloride  
42 Venlafaxine Hydrochloride  
43 Venlafaxine hydrochloride  
44 Venlafaxine hydrochloride  
45 Venlafaxine hydrochloride  
46 Venlafaxine hydrochloride  
47 Venlafaxine hydrochloride  
48 Venlafaxine hydrochloride  
49 Venlafaxine hydrochloride  
50 Venlafaxine hydrochloride  
51 Venlafaxine hydrochloride  
52 Venlafaxine hydrochloride  
53 Venlafaxine hydrochloride  
54 Venlafaxine hydrochloride  
55 Venlafaxine hydrochloride  
56 Venlafaxine hydrochloride  
57 Venlafaxine hydrochloride  
58 Venlafaxine hydrochloride  
59 Venlafaxine hydrochloride  
60 Venlafaxine hydrochloride

1  
2 Venlafaxine hydrochloride  
3 Venlafaxine hydrochloride  
4 Venlafaxine hydrochloride  
5 Venlafaxine Hydrochloride  
6 Venlafaxine Hydrochloride  
7 Venlafaxine hydrochloride  
8 Venlafaxine hydrochloride  
9 Venlafaxine hydrochloride  
10 Venlafaxine hydrochloride  
11 Venlafaxine hydrochloride  
12 Venlafaxine hydrochloride  
13 Venlafaxine hydrochloride  
14 Venlafaxine hydrochloride  
15 Venlafaxine hydrochloride  
16 Venlafaxine hydrochloride  
17 Venlafaxine hydrochloride  
18 Venlafaxine hydrochloride  
19 Venlafaxine hydrochloride  
20 Venlafaxine hydrochloride  
21 Venlafaxine Hydrochloride  
22 Venlafaxine hydrochloride  
23 Venlafaxine hydrochloride  
24 Venlafaxine hydrochloride  
25 Venlafaxine hydrochloride  
26 Venlafaxine hydrochloride  
27 Venlafaxine hydrochloride  
28 Venlafaxine hydrochloride  
29 Venlafaxine hydrochloride  
30 Venlafaxine hydrochloride  
31 Venlafaxine hydrochloride  
32 Venlafaxine hydrochloride  
33 Venlafaxine hydrochloride  
34 Venlafaxine hydrochloride  
35 Venlafaxine hydrochloride  
36 Venlafaxine hydrochloride  
37 Venlafaxine hydrochloride  
38 Venlafaxine hydrochloride  
39 Venlafaxine hydrochloride  
40 Venlafaxine hydrochloride  
41 Venlafaxine hydrochloride  
42 Venlafaxine hydrochloride  
43 Venlafaxine hydrochloride  
44 Viloxazine Hydrochloride  
45 Viloxazine Hydrochloride  
46 Pregabalin  
47 Pregabalin  
48 Mirtazapine  
49 Mirtazapine  
50 Mirtazapine  
51 Venlafaxine  
52 Mirtazapine  
53 Tryptophan  
54 Tryptophan  
55 Tryptophan  
56 Venladex  
57 Venlafaxine  
58 Venlafaxine  
59 Vortioxetine  
60 Vortioxetine



1  
2 Venlafaxine  
3 Efexor  
4 Sertraline  
5 Fluoxetine  
6 Trazodone  
7 Trazodone  
8 Trazodone  
9 Trimipramine  
10 Amitriptyline  
11  
12  
13  
14  
15  
16  
17  
18  
19  
20  
21  
22  
23  
24  
25  
26  
27  
28  
29  
30  
31  
32  
33  
34  
35  
36  
37  
38  
39  
40  
41  
42  
43  
44  
45  
46  
47  
48  
49  
50  
51  
52  
53  
54  
55  
56  
57  
58  
59  
60

For peer review only

|    | <b>medcode</b> | <b>readcode</b> | <b>readterm</b>                                              |
|----|----------------|-----------------|--------------------------------------------------------------|
| 1  |                |                 |                                                              |
| 2  |                |                 |                                                              |
| 3  | 25631          | S02z.00         | Fracture of facial bone NOS                                  |
| 4  | 62966          | S300z00         | Closed fracture proximal femur, transcervical, NOS           |
| 5  | 69777          | SJ1yz00         | Other specified cranial nerve injury NOS                     |
| 6  | 49894          | S4H0500         | Closed #-dislocation, metatarsophalangeal joint, multiple    |
| 7  | 48660          | SD3y.00         | Superficial injury of lower arm NOS, without infection       |
| 8  | 39306          | SH11200         | Superficial burn of the eye                                  |
| 9  | 70039          | SD2zz00         | Superficial injury shoulder/upper arm, infection NOS         |
| 10 | 55965          | SH52A00         | Deep partial thickness burn of the ankle                     |
| 11 | 25461          | SH40600         | Unspecified thickness burn of the back of hand               |
| 12 | 6266           | SD20500         | Abrasion of arm,unspecified level without infection          |
| 13 | 62047          | S103100         | Open fracture thoracic vertebra, wedge                       |
| 14 | 67408          | S481500         | Open traumatic dislocation, metatarso-phalangeal jnt, single |
| 15 | 64974          | SH32800         | Deep partial thickness burn of the forearm                   |
| 16 | 53075          | SE30400         | Contusion, clavicular area                                   |
| 17 | 9740           | SE0..12         | Bruise of head                                               |
| 18 | 29165          | SH50z00         | Unspecified thickness burn of the leg NOS                    |
| 19 | 28192          | SD60100         | Abrasion, thigh                                              |
| 20 | 51009          | SH30400         | Unspecified thickness burn of the axilla                     |
| 21 | 35077          | S352E00         | Closed fracture metatarsal head                              |
| 22 | 24329          | S834100         | Open wound of cheek                                          |
| 23 | 25093          | SK1C200         | Injury of other flexor muscle and tendon at forearm level    |
| 24 | 16016          | S490.00         | Closed dislocation cervical spine                            |
| 25 | 1873           | S36..11         | Toe fracture                                                 |
| 26 | 30733          | SE23112         | Contusion of lower back                                      |
| 27 | 34745          | S440100         | Closed traumatic dislocation, metacarpophalangeal joint      |
| 28 | 32063          | S11..00         | Fracture of spine with spinal cord lesion                    |
| 29 | 15270          | S82v000         | Open wound of ear drum                                       |
| 30 | 48737          | N082K00         | Pathological dislocation of MCP joint                        |
| 31 | 33934          | SK1C.00         | Injury of muscle and tendon at forearm level                 |
| 32 | 72131          | SH71.00         | Burn of the larynx, trachea and lung                         |
| 33 | 69644          | SD6z100         | Superficial injury of thigh NOS, infected                    |
| 34 | 67602          | S481900         | Open traumatic dislocation, pantalar                         |
| 35 | 6808           | SH4..00         | Burn of the wrist(s) and hand(s)                             |
| 36 | 49209          | S300y00         | Closed fracture proximal femur, other transcervical          |
| 37 | 37889          | SF22.00         | Crush injury wrist or hand                                   |
| 38 | 34370          | S230800         | Closed fracture proximal radius, comminuted                  |
| 39 | 8589           | S315.00         | Fracture of lower end of femur                               |
| 40 | 66451          | SD3z100         | Superficial injury of forearm NOS, infected                  |
| 41 | 29128          | SH10800         | Unspecified thickness burn of the cheek                      |
| 42 | 63845          | SH12211         | Eye - 2nd degree burn                                        |
| 43 | 3513           | SH50200         | Unspecified thickness burn of the foot                       |
| 44 | 2513           | S791.00         | Internal injury with open wound into cavity NOS              |
| 45 | 24568          | S930.00         | Open wound of finger or thumb without mention of complicatn  |
| 46 | 24534          | S4A2100         | Closed fracture-subluxation acromio-clavicular joint         |
| 47 | 24486          | SJ70.11         | Head and neck superficial nerve injury                       |
| 48 | 47819          | SF21300         | Closed crush injury, elbow area                              |
| 49 | 103534         | SJ21800         | Anterior thoracic cord injury, without bony injury, T7-12    |
| 50 | 67849          | S4H0200         | Closed fracture-dislocation, tarsometatarsal joint           |
| 51 | 60766          | N083u00         | Recurrent dislocation of foot joint                          |

|    |                |                                                              |
|----|----------------|--------------------------------------------------------------|
| 1  |                |                                                              |
| 2  | 11008 SD1y800  | Superficial injury of groin NOS, without major open wound    |
| 3  | 40069 S331.00  | Open fracture of tibia and fibula, proximal                  |
| 4  | 24010 SH30100  | Unspecified thickness burn of the forearm                    |
| 5  | 68030 SH84z00  | Burn: 40-49% of body surface NOS                             |
| 6  | 47243 SD10B11  | Abrasion or friction burn of testis without infection        |
| 7  | 65055 S82v200  | Open wound of eustachian tube                                |
| 8  | 96998 S4D1600  | Open fracture-dislocation multiple digits                    |
| 9  | 36212 S430000  | Closed traumatic dislocation of wrist, unspecified           |
| 10 | 56544 SH82.00  | Burn involving 20-29% of body surface (BS)                   |
| 11 | 24118 SJB..00  | Injury of nerves at shoulder and upper arm level             |
| 12 | 36709 SH50300  | Unspecified thickness burn of the ankle                      |
| 13 | 34910 S4J0100  | Closed fracture-dislocation of pelvis                        |
| 14 | 39197 SF10100  | Crush injury, scrotum and testis                             |
| 15 | 100872 SH34.00 | Deep full thickness burn of arm without loss of body part    |
| 16 | 36833 SH10z00  | Unspecified thickness burn of the face, head or neck NOS     |
| 17 | 15518 S496z00  | Closed traumatic dislocation not otherwise specified         |
| 18 | 48142 S313200  | Open fracture of femur, lower epiphysis                      |
| 19 | 64452 SH53300  | Full thickness burn of the ankle                             |
| 20 | 69895 SF30200  | Closed crush injury, thigh                                   |
| 21 | 61340 S494200  | Closed dislocation of sacrum                                 |
| 22 | 33957 S300700  | Closed fracture proximal femur, subcapital, Garden grade II  |
| 23 | 55464 S332z00  | Closed fracture of tibia and fibula, shaft, NOS              |
| 24 | 28480 SF30000  | Crush injury, thigh                                          |
| 25 | 34870 S64..00  | Intracranial injury NOS                                      |
| 26 | 51841 SK1xA00  | Open wounds invol multi regions of up limb(s) wth lw limb(s) |
| 27 | 7988 S239.00   | Fracture of shaft of radius                                  |
| 28 | 23778 SJ9..00  | Injury of nerves and spinal cord at thorax level             |
| 29 | 1073 S23x211   | Fracture of ulna NOS                                         |
| 30 | 59690 7K6FQ00  | Primary open reduction # dislocation joint internal fix NEC  |
| 31 | 19288 SD11300  | Abrasion of abdominal wall, infected                         |
| 32 | 101316 S261700 | Open fracture thumb proximal phalanx, head                   |
| 33 | 73441 S003100  | Open #skull vlt + intracranial injury, no loss of consc      |
| 34 | 10609 SH10100  | Unspecified thickness burn of the ear                        |
| 35 | 29109 S33x.00  | Closed fracture of tibia and fibula, unspecified part, NOS   |
| 36 | 73792 SB48300  | Injury of unspecified blood vessel at ankle and foot level   |
| 37 | 61178 SH12x00  | Partial thickness burn of multiple sites face, head or neck  |
| 38 | 23503 S430100  | Closed traumatic dislocation distal radio-ulnar joint        |
| 39 | 67007 S353.00  | Open fracture of other tarsal and metatarsal bones           |
| 40 | 54306 S431500  | Open traumatic dislocation proximal metacarpal               |
| 41 | 10228 S4B..00  | Fracture-dislocation or subluxation elbow                    |
| 42 | 104355 S4B1100 | Open fracture-dislocation superior radio-ulnar joint         |
| 43 | 53915 SD61z00  | Abrasion or friction burn of lower limb, infected, NOS       |
| 44 | 41764 SE44.00  | Contusion, lower limb, multiple sites                        |
| 45 | 36783 7K6H700  | Secondary open reduction fracture disloc joint & fixation    |
| 46 | 16944 S292.00  | Multiple fractures of clavicle, scapula and humerus          |
| 47 | 95513 S100M00  | Closed fracture cervical vertebra, posterior arch            |
| 48 | 35901 S493.11  | Open dislocation of thoracic and lumbar vertebra             |
| 49 | 20893 S310012  | Upper leg fracture NOS                                       |
| 50 | 28015 SE4z.00  | Contusion, site NOS                                          |
| 51 | 40658 S353H00  | Open fracture cuneiforms                                     |

|    |                |                                                              |
|----|----------------|--------------------------------------------------------------|
| 1  |                |                                                              |
| 2  | 94458 SB31100  | Open injury, brachial artery                                 |
| 3  | 53686 S411000  | Open traumatic dislocation shoulder joint, unspecified       |
| 4  | 45664 S352A00  | Closed fracture talus, body                                  |
| 5  | 39887 S100A00  | Closed fracture axis, odontoid process                       |
| 6  | 33935 N083.12  | Habitual dislocation of joint                                |
| 7  |                |                                                              |
| 8  | 358 S3z..11    | Fracture NOS                                                 |
| 9  | 40692 SH40500  | Unspecified thickness burn of the palm of hand               |
| 10 | 44470 S73xy00  | Other gastrointestinal tract injury no open wound to cavity  |
| 11 | 60352 7J43z00  | Fixation of fracture of spine NOS                            |
| 12 | 22308 SE23200  | Contusion of lower back                                      |
| 13 |                |                                                              |
| 14 | 311 SKz..00    | Injury NOS                                                   |
| 15 | 101567 S303100 | Open fracture proximal femur, intertrochanteric, two part    |
| 16 | 68196 SJB1.00  | Injury of multiple nerves at shoulder and upper arm level    |
| 17 | 71373 SH84400  | Burn: 40-49% of body surface, 40-49% BS full thickness       |
| 18 | 60593 S100300  | Closed fracture of third cervical vertebra                   |
| 19 | 43799 SB33200  | Injury of ulnar artery at wrist and hand level               |
| 20 | 34723 S350100  | Closed fracture calcaneus, intra-articular                   |
| 21 | 50247 S04z.00  | Multiple fractures involving skull/face with other bones NOS |
| 22 | 21922 S312200  | Closed fracture of femur, lower epiphysis                    |
| 23 | 28068 S333.00  | Open fracture of tibia/fibula, shaft                         |
| 24 | 45970 PE30000  | Unilateral congenital dislocation of hip                     |
| 25 | 6869 S46z.00   | Dislocation of knee NOS                                      |
| 26 | 57327 SH70.00  | Burn of the mouth and pharynx                                |
| 27 | 265 SK17000    | Other knee injury                                            |
| 28 | 10990 S10B000  | Fracture of lumbar vertebra                                  |
| 29 | 9789 SF20011   | Crush injury of shoulder                                     |
| 30 | 69645 S101100  | Open fracture atlas                                          |
| 31 | 59226 SF11z00  | Crush injury, trunk NOS                                      |
| 32 | 42780 S105.00  | Open fracture lumbar vertebra                                |
| 33 | 27569 SF11200  | Crush injury, breast                                         |
| 34 | 21220 SH42600  | Superficial partial thickness burn of back of hand           |
| 35 | 61491 7J43400  | Primary open reduc spinal fracture+internal fix+rod system   |
| 36 | 32835 SD7yz00  | Superficial injury of foot and toe, without infection, NOS   |
| 37 | 68142 SJ34000  | Closed injury, brachial plexus, upper roots                  |
| 38 | 44732 SH52x00  | Partial thickness burn of multiple sites of the leg          |
| 39 | 55997 SH12G00  | Deep partial thickness burn of the scalp                     |
| 40 | 58893 S733100  | Duodenum injury with open wound into cavity                  |
| 41 | 49249 TG80z00  | Accidental burning/scalding caused by hot liquid/vapour NOS  |
| 42 | 24559 SF10111  | Crush injury of scrotum                                      |
| 43 | 21126 SD80000  | Abrasion or friction burn of eyelids and periocular area     |
| 44 | 41633 TG81y00  | Accidental burning caused by other caustic or corrosive      |
| 45 | 51980 T402600  | Fall from burning ship - docker or stevedore injured         |
| 46 | 53729 S84y100  | Open wound of supraclavicular region with complication       |
| 47 | 42216 7K6FD00  | Primary opn reduction of dislocation+oth stabilisation of jt |
| 48 | 35456 S6...00  | Intracranial injury excluding those with skull fracture      |
| 49 | 58838 SB22000  | Coeliac and mesenteric artery injury, unspecified            |
| 50 | 68347 SH14600  | Deep full thickness burn of scalp without loss of body part  |
| 51 | 22761 S330012  | Closed fracture of tibial tuberosity                         |
| 52 | 20778 SD71.12  | Abrasion or friction burn of toenail, infected               |
| 53 | 41306 TN86.00  | Injury ?accidental, by crashing of aircraft                  |
| 54 |                |                                                              |
| 55 |                |                                                              |
| 56 |                |                                                              |
| 57 |                |                                                              |
| 58 |                |                                                              |
| 59 |                |                                                              |
| 60 |                |                                                              |

|    |                |                                                              |
|----|----------------|--------------------------------------------------------------|
| 1  |                |                                                              |
| 2  | 36083 TG80800  | Accidental burning or scalding caused by chocolate           |
| 3  | 61858 S4D1100  | Open fracture-dislocation, metacarpophalangeal joint         |
| 4  | 48859 S210500  | Closed fracture scapula, spine                               |
| 5  | 11453 7K1LB00  | Closed reduction of fracture of hallux                       |
| 6  | 48159 7J42.11  | Other reduction of fracture of spine and stabilisation       |
| 7  | 40394 S125000  | Closed fracture larynx                                       |
| 8  | 37361 SC19.00  | Late effect of burn NOS                                      |
| 9  | 61676 SD2y.00  | Superficial injury shoulder/upper arm NOS, without infection |
| 10 | 86006 7G1M200  | Glue closure of skin wound                                   |
| 11 | 32936 SD10500  | Abrasion, buttock                                            |
| 12 | 20379 7K6F400  | Open reduction of # dislocation of joint+fxn of jnt,unspec   |
| 13 | 47212 SF11100  | Crush injury, buttock                                        |
| 14 | 100317 S491700 | Open dislocation C6/C7                                       |
| 15 | 22780 7J13.00  | Reduction of fracture of maxilla                             |
| 16 | 40305 S930100  | Open wound, finger, multiple                                 |
| 17 | 29189 N083p00  | Recurrent dislocation of the patella                         |
| 18 | 7099 SH3z.00   | Burn of the arm (excluding wrist and hand) NOS               |
| 19 | 70238 SF30.00  | Crush injury, hip and thigh                                  |
| 20 | 28510 S92z.00  | Open wound of hand, excluding fingers, NOS                   |
| 21 | 55412 S4C2400  | Closed fracture-subluxation lunate (volar)                   |
| 22 | 37974 SB31.00  | Brachial blood vessel injury                                 |
| 23 | 5009 S348.00   | Fracture of medial malleolus                                 |
| 24 | 19375 S4D0400  | Closed fracture-dislocation, proximal interphalangeal joint  |
| 25 | 19341 SD70100  | Abrasion, toe                                                |
| 26 | 19323 SD60300  | Abrasion, lower leg                                          |
| 27 | 17214 SE32100  | Contusion, wrist                                             |
| 28 | 102225 S251C00 | Open fracture thumb metacarpal head                          |
| 29 | 61526 SJ51000  | Closed injury, median nerve                                  |
| 30 | 16906 SE1..00  | Contusion, eye and adnexa                                    |
| 31 | 23845 7K6F300  | Open reduction of dislocation of jt+fxn of joint, unspec     |
| 32 | 38943 S4F7.00  | Open fracture-subluxation, patello-femoral joint             |
| 33 | 19186 S222000  | Closed fracture of humerus NOS                               |
| 34 | 57612 S85z.00  | Open wound of chest wall NOS                                 |
| 35 | 61556 S361300  | Open fracture multiple phalanges, toe                        |
| 36 | 50011 S49x.00  | Other closed multiple and ill-defined dislocation            |
| 37 | 3095 7J03100   | Reduction of fracture of nasal bones NEC                     |
| 38 | 96406 S010z00  | Closed #skull bse no intracranial injury + concussion unspec |
| 39 | 35866 7K6H400  | Revision to closed reduction of fracture dislocation alone   |
| 40 | 18841 S4D1.00  | Open fracture-dislocation digit                              |
| 41 | 50223 S231000  | Open fracture of proximal forearm, unspecified               |
| 42 | 102014 S751.00 | Open injury of spleen                                        |
| 43 | 96731 S624z00  | Extradural h'ge inj no open intracran wnd+concussion unspec  |
| 44 | 27922 S10B300  | Fracture of ilium                                            |
| 45 | 60368 S431600  | Open traumatic dislocation lunate (volar)                    |
| 46 | 18584 S345.00  | Open fracture ankle, bimalleolar                             |
| 47 | 93300 S40..12  | Dislocation of maxilla, inferior                             |
| 48 | 61845 SA12z00  | Open wound of knee/leg/ankle with tendon involvement, NOS    |
| 49 | 99284 SH13300  | Full thickness burn of the lip(s)                            |
| 50 | 10304 SH1z.00  | Burn of the face, head or neck NOS                           |
| 51 | 71934 SD20z00  | Abrasion/friction burn shoulder/upper arm, no infection, NOS |

|    |                |                                                             |
|----|----------------|-------------------------------------------------------------|
| 1  |                |                                                             |
| 2  | 4528 7K1G.00   | Other primary open reduction of fracture of bone            |
| 3  | 101031 S336000 | Fracture tibial plateau                                     |
| 4  | 18388 S343.00  | Open fracture ankle, lateral malleolus                      |
| 5  | 6915 S234B00   | Closed fracture radial styloid                              |
| 6  | 6821 SD3y000   | Superficial injury of elbow NOS                             |
| 7  |                |                                                             |
| 8  | 32866 S313.11  | Open fracture of femur, distal end                          |
| 9  | 18325 S83..00  | Other open wound of head                                    |
| 10 | 68229 S300y11  | Closed fracture of femur, subcapital                        |
| 11 | 101524 TG81011 | Accidental burning by Hydrofluoric acid                     |
| 12 | 7402 SE31.00   | Contusion, elbow or forearm                                 |
| 13 |                |                                                             |
| 14 | 55086 S75z.00  | Injury to spleen NOS                                        |
| 15 | 18273 S30y.00  | Closed fracture of neck of femur NOS                        |
| 16 | 68652 S120800  | Closed fracture of eight or more ribs                       |
| 17 | 2251 S024100   | Closed fracture zygoma                                      |
| 18 |                |                                                             |
| 19 | 18086 SE25.00  | Contusion of pelvic region                                  |
| 20 | 10608 SJ5y100  | Injury of multiple nerves at forearm level                  |
| 21 | 6168 S240100   | Closed fracture of the scaphoid                             |
| 22 | 95608 S451.00  | Open traumatic dislocation of hip                           |
| 23 | 6149 SD8..00   | Superficial injury of eye and adnexa                        |
| 24 | 62808 S260A00  | Closed fracture thumb distal phalanx, shaft                 |
| 25 | 22375 S24..00  | Fracture of carpal bone                                     |
| 26 | 3573 S10x.00   | Closed fracture of spine, unspecified,                      |
| 27 |                |                                                             |
| 28 | 66514 TL9..00  | Homicide                                                    |
| 29 | 50509 SH1..12  | Head burns                                                  |
| 30 |                |                                                             |
| 31 | 71063 S712200  | Lung laceration without mention of open wound into thorax   |
| 32 | 24587 S4E..00  | Fracture-dislocation or subluxation hip                     |
| 33 | 65260 SH14200  | Deep full thickness burn of eye without loss of body part   |
| 34 | 62723 SF31.00  | Crush injury, knee and lower leg                            |
| 35 | 23623 S84..00  | Open wound of neck                                          |
| 36 |                |                                                             |
| 37 | 65690 S300200  | Closed fracture proximal femur, midcervical section         |
| 38 | 25508 SD40100  | Abrasion, hand, dorsum                                      |
| 39 | 42049 SD1y900  | Superficial injury of perineum NOS without major open wound |
| 40 | 88784 7J13y00  | Other specified reduction of fracture of maxilla            |
| 41 | 102302 S234G00 | Greenstick fracture of distal radius                        |
| 42 | 7142 SD21.00   | Abrasion or friction burn of shoulder/upper arm, infected   |
| 43 | 14848 S410500  | Closed traumatic dislocation scapula                        |
| 44 | 17467 S8...12  | Open wound of head                                          |
| 45 | 44887 SC17.00  | Late effect of burn of arm, leg and foot                    |
| 46 |                |                                                             |
| 47 | 17443 7J12.11  | Reduction of fracture of jaw NEC                            |
| 48 | 21427 SD1yA00  | Superficial injury of penis NOS, without major open wound   |
| 49 | 21743 SA2..11  | Open wound of heel                                          |
| 50 |                |                                                             |
| 51 | 32894 SK1E200  | Injury of multiple muscles and tendons at lower leg level   |
| 52 | 28434 SE23400  | Contusion of sacral region                                  |
| 53 | 27404 S102.00  | Closed fracture thoracic vertebra                           |
| 54 | 97820 S225900  | Open fracture distal humerus, bicondylar (T-Y fracture)     |
| 55 | 51522 SH11500  | Superficial burn of the nose                                |
| 56 | 51455 S84x.00  | Other open wound of neck                                    |
| 57 |                |                                                             |
| 58 | 9394 SD40.00   | Abrasion/friction burn of hand, without infection           |
| 59 | 41925 TG9z000  | Accidental burn or other injury from electric current NOS   |
| 60 | 96863 S724.00  | Injury of bronchus                                          |



|    |                |                                                              |
|----|----------------|--------------------------------------------------------------|
| 1  |                |                                                              |
| 2  | 29611 S820.00  | Open wound of external ear                                   |
| 3  | 17174 7K6G600  | Closed reduction of dislocation of finger                    |
| 4  | 41650 SH01.00  | Other burns of eyelids and periocular area                   |
| 5  | 44736 S837.00  | Open wound in mouth with complication                        |
| 6  |                |                                                              |
| 7  | 65724 S000000  | Closed #skull vlt no intracranial injury, unspec state consc |
| 8  | 73724 SD1yC00  | Superficial injury of vulva NOS, without major open wound    |
| 9  | 62677 SH24.00  | Deep full thickness burn of trunk without loss of body part  |
| 10 | 57109 SF22800  | Open crush injury hand, dorsum                               |
| 11 | 17061 SD21300  | Abrasion of upper arm, infected                              |
| 12 |                |                                                              |
| 13 | 69354 SF20200  | Crush injury, axillary region                                |
| 14 | 34307 S260P00  | Closed fracture finger middle phalanx, head                  |
| 15 | 11220 SD1y400  | Superficial injury of back NOS, without major open wound     |
| 16 | 21175 S250x00  | Closed fractures of multiple sites of unspecified metacarpus |
| 17 | 65179 S903200  | Degloving injury, axilla                                     |
| 18 |                |                                                              |
| 19 | 70674 S133z00  | Open fracture of pubis NOS                                   |
| 20 | 18338 S260F00  | Closed fracture finger proximal phalanx, shaft               |
| 21 | 69824 SR13.00  | Fractures involving multiple regions of one lower limb       |
| 22 | 16890 S022.12  | Fracture of lower jaw, closed                                |
| 23 | 3288 S10A.00   | Fracture of neck                                             |
| 24 |                |                                                              |
| 25 | 48544 S942.11  | Multiple/unspec open wound of upper limb with tendon injury  |
| 26 | 73342 SJ52600  | Open injury, ulnar nerve, palmar sensory                     |
| 27 | 93142 7K6F600  | Primary open reduction of dislocation and skeletal traction  |
| 28 | 16769 TC7..00  | Fracture, cause unspecified                                  |
| 29 | 35355 SH50100  | Unspecified thickness burn of the toe(s)                     |
| 30 |                |                                                              |
| 31 | 48925 S353z00  | Open fracture of tarsal and metatarsal bones NOS             |
| 32 | 64441 SB0..00  | Injury to blood vessels of head and neck                     |
| 33 | 33412 SH22.00  | Partial thickness burn of the trunk                          |
| 34 | 58029 S901x00  | Multiple open wounds of upper arm with complication          |
| 35 | 16895 N1y1.00  | Fatigue fracture of vertebra                                 |
| 36 |                |                                                              |
| 37 | 70919 7K1Ly00  | Other specified other closed reduction of fracture of bone   |
| 38 | 45410 7J41z00  | Decompression of fracture of spine NOS                       |
| 39 | 14725 SH9z.00  | Burn - unspecified                                           |
| 40 | 59167 SH22800  | Deep partial thickness burn of the breast                    |
| 41 | 56137 TK52.00  | Suicide and selfinflicted injury by hunting rifle            |
| 42 | 31854 TK4..00  | Suicide and selfinflicted injury by drowning                 |
| 43 |                |                                                              |
| 44 | 16277 S100200  | Closed fracture axis                                         |
| 45 | 60630 S235000  | Open fracture of forearm, lower end, unspecified             |
| 46 | 51853 S8...13  | Open wound of trunk                                          |
| 47 | 4845 SK17400   | Calf injury                                                  |
| 48 |                |                                                              |
| 49 | 73502 S913100  | Degloving injury, elbow area                                 |
| 50 | 343 S234100    | Closed Colles' fracture                                      |
| 51 | 28724 S224700  | Closed fracture distal humerus, medial epicondyle            |
| 52 | 28273 S321.00  | Open fracture of the patella                                 |
| 53 |                |                                                              |
| 54 | 109424 SD1z.00 | Superficial injury of trunk NOS, infected                    |
| 55 | 721 S0...00    | Fracture of skull                                            |
| 56 | 67454 SD1yz00  | Superficial injury trunk, without major wound/infection NOS  |
| 57 | 16053 SH70200  | Burn of the tongue                                           |
| 58 | 15953 S72z.00  | Intrathoracic organ injury NOS                               |
| 59 | 58999 SC11.00  | Late effect of open wound arm or leg without tendon injury   |
| 60 | 15878 S835000  | Open wound of face with complication, unspecified            |



|    |                |                                                              |
|----|----------------|--------------------------------------------------------------|
| 1  |                |                                                              |
| 2  | 103695 SJ21B00 | Incompl thoracic cord injury,unsp,without bony injury, T7-12 |
| 3  | 285 S83z.00    | Open wound of head NOS                                       |
| 4  | 5080 SH0.00    | Burn confined to eye and adnexa                              |
| 5  | 33763 SH51100  | Superficial burn of the toe(s)                               |
| 6  | 5332 S312300   | Closed fracture distal femur, supracondylar                  |
| 7  | 40164 S330500  | Closed fracture proximal tibia, bicondylar                   |
| 8  | 94264 TG80900  | Accidental burning or scalding caused by milk                |
| 9  | 15613 S100000  | Closed fracture of unspecified cervical vertebra             |
| 10 | 15580 S480500  | Cls traumatic dislocation, metatarso-phalangeal jnt, single  |
| 11 | 55356 S4D2300  | Closed fracture-subluxation, distal interphalangeal joint    |
| 12 | 9009 SD0y000   | Superficial injury of face NOS                               |
| 13 | 32724 SH52300  | Superficial partial thickness burn of the ankle              |
| 14 | 15491 S4G.00   | Fracture-dislocation or subluxation ankle                    |
| 15 | 7723 S337.00   | Fracture of shaft of tibia                                   |
| 16 | 29878 S833.00  | Open wound of nose with complication                         |
| 17 | 27976 SH40.00  | Unspecified thickness burn of the wrist and hand             |
| 18 | 101859 SJ4y.00 | Other trunk nerve injury                                     |
| 19 | 34043 SH43000  | Full thickness burn of the hand, unspecified                 |
| 20 | 58845 SF20z00  | Crush injury, shoulder and upper arm NOS                     |
| 21 | 12142 SE0..11  | Bruise of face                                               |
| 22 | 25098 SD7z000  | Superficial injury of foot NOS, infected                     |
| 23 | 63738 SJ57000  | Closed injury, suprascapular nerve                           |
| 24 | 8774 SH5z.00   | Burn of the lower limb NOS                                   |
| 25 | 37801 SH41.12  | First degree burn of finger                                  |
| 26 | 28177 SJ32.00  | Lumbar nerve root injury                                     |
| 27 | 71521 SJ22.00  | Lumbar cord injury without spinal bone injury                |
| 28 | 41913 SH43500  | Full thickness burn of the palm of hand                      |
| 29 | 73229 S940.00  | Multiple/unspec open wound upper limb without complication   |
| 30 | 40765 SB00100  | Common carotid artery injury                                 |
| 31 | 105693 SB1z.00 | Thoracic blood vessel injury NOS                             |
| 32 | 33475 S321200  | Open fracture patella, distal pole                           |
| 33 | 14865 SD91.00  | Abrasion or friction burn, infected, NOS                     |
| 34 | 8138 SD10.00   | Abrasion, trunk                                              |
| 35 | 21763 SH6..00  | Burn of multiple specified sites                             |
| 36 | 96430 TKx7.00  | Suicide and selfinflicted injury caustic subst, excl poison  |
| 37 | 52862 SA0z.00  | Open wound of hip and thigh NOS                              |
| 38 | 100294 S441600 | Open traumatic dislocation multiple digits                   |
| 39 | 30288 7J13000  | Reduction of fracture of alveolus of maxilla                 |
| 40 | 383 SH91.11    | First degree burn                                            |
| 41 | 15887 S790.00  | Internal injury without open wound into cavity NOS           |
| 42 | 9468 S4B0000   | Closed fracture-dislocation elbow joint                      |
| 43 | 46768 S7A..00  | Injury of pancreas                                           |
| 44 | 47984 SB13.00  | Superior vena cava injury                                    |
| 45 | 27554 S811.00  | Ocular laceration with intraocular prolapse                  |
| 46 | 62536 SB32100  | Open injury, radial artery                                   |
| 47 | 52441 SH42500  | Superficial partial thickness burn of palm of hand           |
| 48 | 59300 SJ5x.00  | Other shoulder girdle and upper limb nerve injury            |
| 49 | 20171 SJ15.00  | Acoustic (8th) nerve injury                                  |
| 50 | 12864 SF02.00  | Crush injury, neck                                           |
| 51 | 97827 S496011  | Closed dislocation of sternoclavicular joint                 |

|    |                |                                                              |
|----|----------------|--------------------------------------------------------------|
| 1  |                |                                                              |
| 2  | 44635 7K6Hz00  | Secondary reduction of traumatic dislocation of joint NOS    |
| 3  | 53894 SH55100  | Deep full thickness burn of toe(s), with loss of body part   |
| 4  | 66434 S107.00  | Open fracture sacrum                                         |
| 5  | 30087 SE22100  | Contusion, flank                                             |
| 6  | 48279 SH33.00  | Full thickness burn of the arm                               |
| 7  | 65197 S73z.00  | Injury to gastrointestinal tract, NOS                        |
| 8  | 73601 S105000  | Open fracture lumbar vertebra, burst                         |
| 9  | 12729 SE30011  | Shoulder bruise                                              |
| 10 | 62005 S480000  | Closed traumatic dislocation of foot, unspecified            |
| 11 | 12663 S832.00  | Open wound of nose                                           |
| 12 | 33961 S134.00  | Other or multiple closed fracture of pelvis                  |
| 13 | 15079 S352100  | Closed fracture of talus                                     |
| 14 | 28708 S234600  | Closed fracture radius and ulna, distal                      |
| 15 | 12546 S250400  | Closed fracture finger metacarpal neck                       |
| 16 | 37576 SH21300  | Superficial burn of the abdominal wall                       |
| 17 | 57340 SH73.00  | Burn of the gastrointestinal tract                           |
| 18 | 2139 TG81.00   | Accidental burning caused by caustic and corrosive substance |
| 19 | 12503 SE20.00  | Contusion, breast                                            |
| 20 | 104846 SB30400 | Open injury, axillary vein                                   |
| 21 | 56457 SK1W.00  | Injury of unspecified muscle and tendon of trunk             |
| 22 | 64806 SB11.00  | Innominate (brachiocephalic) artery injury                   |
| 23 | 102043 S112A00 | Cls spinal fracture with posterior thorac cord lesion, T7-12 |
| 24 | 99203 S135y00  | Other open fracture of pelvis                                |
| 25 | 100281 SD1z000 | Superficial injury of interscapular region NOS, infected     |
| 26 | 94411 S032.00  | Open #skull NOS without mention of intracranial injury       |
| 27 | 11004 S120900  | Closed fracture multiple ribs                                |
| 28 | 20744 7J42.00  | Other reduction of fracture of spine                         |
| 29 | 57190 S022700  | Closed fracture of mandible, alveolar border of body         |
| 30 | 36527 S4D2100  | Closed fracture-subluxation, metacarpophalangeal joint       |
| 31 | 67389 S492300  | Closed spinal dislocation with complete thoracic cord lesion |
| 32 | 12219 SD70.12  | Abrasion or friction burn of toenail, without infection      |
| 33 | 42990 S4D0000  | Closed fracture-dislocation digit, unspecified               |
| 34 | 55682 S761200  | Kidney laceration with open wound into cavity                |
| 35 | 12132 S91..00  | Open wound of elbow, forearm and wrist                       |
| 36 | 60615 S113.00  | Open fracture of thoracic spine with spinal cord lesion      |
| 37 | 12112 SH11100  | Superficial burn of the ear                                  |
| 38 | 36449 7K1Ez00  | Prim open reduction fracture bone & extramedull fixation NOS |
| 39 | 65904 S900100  | Open wound of scapular region                                |
| 40 | 60412 7J13600  | Reduction of Le Fort 3 fracture of maxilla                   |
| 41 | 12063 S230B00  | Closed fracture olecranon, intra-articular                   |
| 42 | 10007 S338.00  | Fracture of lower end of tibia                               |
| 43 | 44431 S270.00  | Closed multiple fractures of hand bones                      |
| 44 | 41675 S01..13  | Frontal sinus fracture                                       |
| 45 | 2642 S022.00   | Fracture of mandible, closed                                 |
| 46 | 7930 7K1F500   | Primary open reduction fracture patella fixat tension band   |
| 47 | 3404 S93..00   | Open wound of finger(s) or thumb                             |
| 48 | 36084 TKx2.00  | Suicide and selfinflicted injury by scald                    |
| 49 | 4211 S20..11   | Collar bone fracture                                         |
| 50 | 67822 SB34300  | Injury of deep palmar arch                                   |
| 51 | 18361 7K6G300  | Closed reduction of dislocation of shoulder                  |

|    |                |                                                              |
|----|----------------|--------------------------------------------------------------|
| 1  |                |                                                              |
| 2  | 11702 SD2y300  | Superficial injury of upper arm NOS                          |
| 3  | 53650 S250C00  | Closed fracture thumb metacarpal head                        |
| 4  | 43338 S77..11  | Internal pelvic injury                                       |
| 5  | 14826 S344.11  | Dupuytren's fracture, fibula                                 |
| 6  | 59647 SA10z00  | Open wound of knee, leg and ankle NOS                        |
| 7  | 11515 S910100  | Open wound of elbow                                          |
| 8  | 45356 SD10300  | Abrasion, abdominal wall                                     |
| 9  | 28304 SH00.00  | Chemical burn of eyelids and periorcular area                |
| 10 | 50460 7K1Fz00  | Primary open reduction of intraarticular fracture bone NOS   |
| 11 | 105332 SJ15.11 | Auditory cranial nerve injury                                |
| 12 | 64139 S13z.00  | Open fracture of pelvis NOS                                  |
| 13 | 66961 TN20.00  | Injury ?accidental, poisoning by motor vehicle exhaust gas   |
| 14 | 59900 SF2z.00  | Crush injury, upper limb NOS                                 |
| 15 | 12525 SD61200  | Abrasion of knee, infected                                   |
| 16 | 48958 S112100  | Cls spinal fracture wth complete thoracic cord lesion,T1-6   |
| 17 | 61315 S410311  | Inferior dislocation of shoulder                             |
| 18 | 104754 TN02.00 | Injury ?accidental, poisoning by other sedative/hypnotic     |
| 19 | 11275 S3X..00  | Fracture of lower leg, part unspecified                      |
| 20 | 48224 S121.00  | Open fracture rib                                            |
| 21 | 45344 S903300  | Degloving injury, upper arm                                  |
| 22 | 9261 S4C1000   | Open fracture-dislocation, distal radio-ulnar joint          |
| 23 | 11222 S220.00  | Closed fracture of the proximal humerus                      |
| 24 | 108479 S751300 | Spleen parenchyma laceration with open wound into cavity     |
| 25 | 28079 S600.00  | Concussion with no loss of consciousness                     |
| 26 | 58611 SA00.00  | Open wound of hip and thigh without mention of complication  |
| 27 | 30956 S11x.00  | Closed fracture of spine with spinal cord lesion unspecified |
| 28 | 21161 SE11.11  | Bruise of eyelids                                            |
| 29 | 89236 7403900  | Surgical outfracture of turbinate of nose                    |
| 30 | 34194 S496100  | Closed traumatic dislocation of pelvis                       |
| 31 | 62955 S000100  | Closed #skull vlt no intracranial injury, no loss of consc   |
| 32 | 24790 S026.00  | Closed orbital blow-out fracture                             |
| 33 | 109115 S353800 | Open fracture talus, head                                    |
| 34 | 29748 S352D00  | Closed fracture metatarsal neck                              |
| 35 | 60206 SJ53000  | Closed injury, radial nerve                                  |
| 36 | 44861 SH52z00  | Partial thickness burn of the leg NOS                        |
| 37 | 73047 S772.00  | Ureter injury without mention of open wound into cavity      |
| 38 | 10764 SE42011  | Heel bruise                                                  |
| 39 | 14847 7K6Fz00  | Primary open reduction of traumatic dislocation of joint NOS |
| 40 | 65494 S4D3400  | Open fracture-subluxation, proximal interphalangeal joint    |
| 41 | 17150 SC17.11  | Late effect of burn of arm or leg                            |
| 42 | 38480 SC3D100  | Sequelae of dislocation, sprain and strain of lower limb     |
| 43 | 5381 S15..00   | Fracture of thoracic vertebra                                |
| 44 | 71148 SH22B00  | Deep partial thickness burn of the back (excluding buttock)  |
| 45 | 52895 S250700  | Closed fracture finger metacarpal, multiple                  |
| 46 | 17360 SK10800  | Injury of muscle and tendon at neck level                    |
| 47 | 10640 S23..11  | Forearm fracture                                             |
| 48 | 35388 SJ67.00  | Injury of nerves at ankle and foot level                     |
| 49 | 60531 SH22C00  | Deep partial thickness burn of the buttock                   |
| 50 | 61484 SD0z000  | Superficial injury of face NOS, infected                     |
| 51 | 52746 SH52B00  | Deep partial thickness burn of the lower leg                 |

|    |                |                                                              |
|----|----------------|--------------------------------------------------------------|
| 1  |                |                                                              |
| 2  | 33489 S220200  | Closed fracture of proximal humerus, anatomical neck         |
| 3  | 67296 SJ00.00  | Optic nerve (2nd) injury                                     |
| 4  | 10616 SE31000  | Contusion, forearm area                                      |
| 5  | 7636 S231600   | Open fracture radial head                                    |
| 6  |                |                                                              |
| 7  | 20281 SE24.00  | Contusion, genital organs                                    |
| 8  | 21998 SJ31.00  | Thoracic nerve root injury                                   |
| 9  | 68233 7K6H600  | Secondary open reduction dislocation joint+fixation jnt,unsp |
| 10 | 41890 SH51500  | Superficial burn of the knee                                 |
| 11 | 48878 SK1x900  | Open wounds involv thorax with abdomen,lwr back and pelvis   |
| 12 |                |                                                              |
| 13 | 27378 S49x.12  | Back dislocation NOS                                         |
| 14 | 95674 N1y2.00  | Pars interarticularis stress fracture                        |
| 15 | 105935 S107000 | Open compression fracture sacrum                             |
| 16 | 54625 S77A.00  | Injury of fallopian tube                                     |
| 17 | 94275 TG80C00  | Accidental burning or scalding caused by steam from kettle   |
| 18 | 92825 SH44200  | Deep full thickness burn of thumb without loss of body part  |
| 19 | 53665 SA32.00  | Open wound of toe(s) with tendon involvement                 |
| 20 | 99073 SJ16.00  | Accessory (11th) nerve injury                                |
| 21 |                |                                                              |
| 22 | 1179 S28..11   | Ill-defined fracture of arm                                  |
| 23 | 33757 S260M00  | Closed fracture finger middle phalanx, shaft                 |
| 24 |                |                                                              |
| 25 | 6569 S62..13   | Subdural haemorrhage following injury                        |
| 26 | 22370 S330400  | Closed fracture proximal tibia, lateral condyle (plateau)    |
| 27 | 16181 S83x.00  | Other open wound of head                                     |
| 28 | 93648 S465100  | Closed traumatic dislocation knee joint, anterior            |
| 29 | 8916 S47..13   | Dislocation of tibia, distal end                             |
| 30 |                |                                                              |
| 31 | 8348 S4A0.00   | Closed fracture-dislocation shoulder                         |
| 32 | 35386 S211.00  | Open fracture of scapula                                     |
| 33 | 68104 SB33100  | Open injury, ulnar artery                                    |
| 34 | 10201 S64..11  | Brain injury NOS                                             |
| 35 | 35096 S104300  | Closed fracture lumbar vertebra, spinous process             |
| 36 |                |                                                              |
| 37 | 28352 S33y100  | Open fracture of fibula, unspecified part, NOS               |
| 38 | 35035 SH50.00  | Unspecified thickness burn of the leg                        |
| 39 | 10106 SD60.11  | Abrasion or friction burn of leg, without infection          |
| 40 | 54353 S12X.00  | Fracture of bony thorax, part unspecified                    |
| 41 |                |                                                              |
| 42 | 10095 S311100  | Open fracture shaft of femur                                 |
| 43 | 64207 S466.00  | Other open traumatic dislocation of knee                     |
| 44 | 28320 S773.00  | Ureter injury with open wound into cavity                    |
| 45 | 10022 S235.11  | Wrist fracture - open                                        |
| 46 | 2303 S237.00   | Fracture of upper end of radius                              |
| 47 |                |                                                              |
| 48 | 10008 N338.00  | Malunion and nonunion of fracture                            |
| 49 | 96903 7K1KA00  | Revision to functional bracing of fracture                   |
| 50 | 61837 SB0z.00  | Head and neck blood vessel injury NOS                        |
| 51 | 96136 S4C0500  | Closed fracture-dislocation peri-lunate (dorsal)             |
| 52 | 24025 SC21.00  | Late effect of cranial nerve injury                          |
| 53 |                |                                                              |
| 54 | 62719 S101611  | C6 vertebra open fracture without spinal cord lesion         |
| 55 | 68670 N082211  | Elbow pathological dislocation                               |
| 56 | 9771 S020.11   | Closed fracture nasal bone                                   |
| 57 | 1084 SE...00   | Contusion (bruise) with intact skin                          |
| 58 |                |                                                              |
| 59 | 100118 S73x600 | Closed injury of pancreas                                    |
| 60 | 9727 7K1H.00   | Secondary open reduction of fracture of bone                 |
|    | 99397 S261600  | Open fracture thumb proximal phalanx, neck                   |

|    |                |                                                             |
|----|----------------|-------------------------------------------------------------|
| 1  |                |                                                             |
| 2  | 9688 S127.00   | Fracture of rib                                             |
| 3  | 9670 SE41000   | Contusion, lower leg                                        |
| 4  | 51518 SD11100  | Abrasion of chest wall, infected                            |
| 5  | 50634 S250A00  | Closed fracture thumb metacarpal shaft                      |
| 6  | 36543 SB35200  | Closed injury, digital vein                                 |
| 7  |                |                                                             |
| 8  | 9538 S230100   | Closed fracture olecranon, extra-articular                  |
| 9  | 52318 S310z00  | Closed fracture of shaft or unspecified part, NOS           |
| 10 | 12615 SE1..11  | Bruise of eye                                               |
| 11 | 17469 SJ56600  | Injury of digital nerve of thumb                            |
| 12 |                |                                                             |
| 13 | 9420 S221.00   | Open fracture of the proximal humerus                       |
| 14 | 2439 SK10900   | Scalp injury                                                |
| 15 | 9348 S3x3.00   | Multiple fractures of lower leg                             |
| 16 | 4978 S02x100   | Fracture of orbit NOS, closed                               |
| 17 | 57977 SH41.14  | First degree burn of thumb                                  |
| 18 |                |                                                             |
| 19 | 108083 SB23100 | Inferior mesenteric vein injury                             |
| 20 | 66237 S292100  | Open multiple fractures of clavicle, scapula and humerus    |
| 21 | 28271 SBz..00  | Injury to blood vessel NOS                                  |
| 22 | 16779 SF00100  | Crush injury, ear                                           |
| 23 | 49588 S241E00  | Open fracture scaphoid, tuberosity                          |
| 24 |                |                                                             |
| 25 | 9212 S34z.00   | Fracture of ankle, NOS                                      |
| 26 | 62803 SE30y00  | Contusion, shoulder and upper arm, multiple sites           |
| 27 | 71207 S221200  | Open fracture of proximal humerus, anatomical neck          |
| 28 | 18336 S261.00  | Open fracture of one or more phalanges of hand              |
| 29 | 44673 S4H2.00  | Closed fracture-subluxation, foot                           |
| 30 |                |                                                             |
| 31 | 99251 SA33000  | Degloving injury toe                                        |
| 32 | 43972 S4B1.00  | Open fracture-dislocation elbow                             |
| 33 | 64435 S4C0400  | Closed fracture-dislocation lunate (volar)                  |
| 34 | 9094 SD30.00   | Abrasion or friction burn of lower arm, without infection   |
| 35 | 30150 S911.00  | Open wound of lower arm with complication                   |
| 36 |                |                                                             |
| 37 | 105683 SH44700 | Deep full thickness burn of wrist without loss of body part |
| 38 | 62028 SH35400  | Deep full thickness burn of axilla, with loss of body part  |
| 39 | 65688 S4H1500  | Open #-dislocation, metatarsophalangeal joint, multiple     |
| 40 | 8460 SK13300   | Unspecified injury of wrist                                 |
| 41 | 42205 SH92100  | Deep partial thickness burn NOS                             |
| 42 |                |                                                             |
| 43 | 61150 S104200  | Closed fracture lumbar vertebra, spondylolysis              |
| 44 | 27992 S335.00  | Open fracture distal tibia                                  |
| 45 | 67097 S260Q00  | Closed fracture finger middle phalanx, multiple             |
| 46 | 67024 SJ60100  | Open injury sciatic nerve                                   |
| 47 |                |                                                             |
| 48 | 67394 S301700  | Open fracture proximal femur,subcapital, Garden grade II    |
| 49 | 70226 S351100  | Open fractures calcaneus, intra-articular                   |
| 50 | 50155 SJ24.00  | Cauda equina injury without bony injury                     |
| 51 | 8783 S44..00   | Dislocation or subluxation of finger or thumb               |
| 52 | 8780 S41z.00   | Dislocation of shoulder NOS                                 |
| 53 |                |                                                             |
| 54 | 58065 S352500  | Closed fracture intermediate cuneiform                      |
| 55 | 52513 S471.00  | Open traumatic dislocation ankle joint                      |
| 56 | 106489 S740400 | Liver major laceration without open wound into cavity       |
| 57 | 8661 S224600   | Closed fracture distal humerus, lateral epicondyle          |
| 58 | 60687 SJA0.00  | Concussion and oedema of lumbar spinal cord                 |
| 59 | 71845 SB22700  | Inferior mesenteric artery injury                           |
| 60 | 9309 SH5..00   | Burn of lower limbs                                         |



|    |                |                                                              |
|----|----------------|--------------------------------------------------------------|
| 1  |                |                                                              |
| 2  | 28399 TN51.00  | Injury ?accidental, by shotgun                               |
| 3  | 39787 S430600  | Closed traumatic dislocation lunate (volar)                  |
| 4  | 39822 SJ30600  | Cervical nerve root injury - C7                              |
| 5  | 46267 S740100  | Liver haematoma and contusion without open wound into cavity |
| 6  |                |                                                              |
| 7  | 70894 7K6GG00  | Closed reduction of dislocation of spine                     |
| 8  | 33918 SC0X.00  | Sequelae of other fracture of thorax and pelvis              |
| 9  | 8465 S334100   | Closed fracture distal tibia, intra-articular                |
| 10 | 32214 S644.00  | Focal brain injury                                           |
| 11 | 10617 SD60400  | Abrasion, ankle                                              |
| 12 |                |                                                              |
| 13 | 26283 SC22.00  | Late effect of spinal cord injury                            |
| 14 | 100202 S33C.00 | Closed fracture of distal tibia and fibula                   |
| 15 | 8382 S238.00   | Fracture of shaft of ulna                                    |
| 16 | 94372 S911z00  | Open wound of lower arm with complication, NOS               |
| 17 | 69363 S261N00  | Open fracture finger middle phalanx, neck                    |
| 18 |                |                                                              |
| 19 | 101489 SK17600 | Posterolateral corner injury of knee                         |
| 20 | 8302 S260.00   | Closed fracture of one or more phalanges of hand             |
| 21 | 18299 S234.00  | Closed fracture of radius and ulna, lower end                |
| 22 | 68899 S29..13  | Multiple fractures of sternum                                |
| 23 | 46132 SJ11.11  | Fourth cranial nerve injury                                  |
| 24 |                |                                                              |
| 25 | 71492 TN9..00  | Injury ?accidental, late effects                             |
| 26 | 62513 SH54500  | Deep full thickness burn of knee without loss of body part   |
| 27 | 55424 S120500  | Closed fracture of five ribs                                 |
| 28 | 1023 S830.00   | Open wound of scalp                                          |
| 29 | 42139 S260B00  | Closed fracture thumb distal phalanx, tuft                   |
| 30 |                |                                                              |
| 31 | 8197 SE2..11   | Bruise, trunk                                                |
| 32 | 8150 S903000   | Degloving injury, shoulder area                              |
| 33 | 11635 S352200  | Closed fracture navicular                                    |
| 34 | 55346 S100x00  | Multiple closed fractures of cervical vertebrae              |
| 35 |                |                                                              |
| 36 | 101560 S121z00 | Open fracture of rib(s) NOS                                  |
| 37 | 3809 S00..11   | Frontal bone fracture                                        |
| 38 | 46142 S04..00  | Multiple fractures involving skull or face with other bones  |
| 39 | 28729 SB00.00  | Carotid artery injury                                        |
| 40 | 68657 SD6z400  | Superficial injury of ankle NOS, infected                    |
| 41 |                |                                                              |
| 42 | 70086 7433300  | Reduction of laryngeal fracture                              |
| 43 | 33651 S260700  | Closed fracture thumb proximal phalanx, head                 |
| 44 | 71725 S011400  | Closed #skull bse + intracranial injury, >24hr LOC+recovery  |
| 45 | 17956 S201200  | Open fracture clavicle, shaft                                |
| 46 | 65141 S241.00  | Open fracture of carpal bone                                 |
| 47 |                |                                                              |
| 48 | 95842 S104500  | Closed fracture lumbar vertebra, posterior arch              |
| 49 | 69789 SJ5C000  | Closed injury, posterior interosseous nerve                  |
| 50 | 50647 S430z00  | Closed traumatic dislocation of wrist NOS                    |
| 51 | 68688 SH43.14  | Third degree burn of wrist                                   |
| 52 | 35011 S32z.00  | Fracture of patella, NOS                                     |
| 53 |                |                                                              |
| 54 | 7671 SE4..00   | Contusion, lower limb and other unspecified sites            |
| 55 | 73768 S211000  | Open fracture of scapula, unspecified part                   |
| 56 | 60481 SH10x00  | Unspecified thickness burn multiple sites face, head or neck |
| 57 | 11333 7K1K800  | Primary external fixation of fracture                        |
| 58 | 43566 S343000  | Open fracture ankle, lateral malleolus, low                  |
| 59 | 64167 S003000  | Open #skull vlt + intracranial injury, unspec state of consc |
| 60 | 51971 TN87.00  | Injury ?accidental, by caustic substances, except poisoning  |

|    |                |                                                              |
|----|----------------|--------------------------------------------------------------|
| 1  |                |                                                              |
| 2  | 72689 SB43z00  | Saphenous vein injury NOS                                    |
| 3  | 46623 TN84.00  | Injury ?accidental, by electrocution                         |
| 4  | 69267 SH32.11  | Blister of arm, second degree burn                           |
| 5  | 73165 S240F00  | Closed fracture carpal bones, multiple                       |
| 6  | 25518 TG81000  | Accidental burning caused by acid                            |
| 7  | 11277 S150.00  | Multiple fractures of thoracic spine                         |
| 8  |                |                                                              |
| 9  | 109332 SH34000 | Deep full thickness burn of arm unsp, no loss of body part   |
| 10 | 38656 SE33300  | Contusion, finger, multiple                                  |
| 11 | 92268 S4H0600  | Closed fracture-dislocation, IPJ, multiple toes              |
| 12 | 72376 S933400  | Ring avulsion injury, class 3                                |
| 13 | 29612 Sz...00  | Injury and poisoning NOS                                     |
| 14 | 35145 SH12.00  | Partial thickness burn of the face, head or neck             |
| 15 | 90888 SJ54000  | Closed injury, musculo-cutaneous nerve                       |
| 16 | 38131 7K1LN00  | Closed reduction of fracture of upper limb                   |
| 17 | 12754 SH40.13  | Unspecified degree burn of thumb                             |
| 18 | 52371 S344100  | Closed fracture ankle, bimalleolar, high fibular fracture    |
| 19 | 62649 SP04C00  | Fracture of bone allograft                                   |
| 20 | 60402 SC00.12  | Late effect of skull fracture                                |
| 21 | 7054 SD61.11   | Abrasion or friction burn of leg, infected                   |
| 22 | 16081 S49x.11  | Arm dislocation NOS                                          |
| 23 | 48880 S80z.00  | Open wound of ocular adnexa NOS                              |
| 24 | 67856 SB43000  | Greater saphenous vein injury                                |
| 25 | 73109 S211400  | Open fracture scapula, blade                                 |
| 26 | 6996 SE0..00   | Contusion of face, scalp and neck, excluding eye(s)          |
| 27 | 95620 S100J00  | Closed fracture cervical vertebra, spondylolysis             |
| 28 | 69098 S101111  | C1 vertebra open fracture without spinal cord lesion         |
| 29 | 6942 7K1LL00   | Closed reduction of fracture of radius and or ulna           |
| 30 | 6925 SD4y.00   | Superficial injury of hand NOS, without mention of infection |
| 31 | 101565 SJ52100 | Closed injury, ulnar nerve, dorsal sensory                   |
| 32 | 100552 SB3x.00 | Multiple blood vessel injury of upper extremity              |
| 33 | 52004 TN06.00  | Injury ?accidental, poisoning by corrosive/caustic substance |
| 34 | 70659 SB1y200  | Internal mammary artery injury                               |
| 35 | 6881 S250z00   | Closed fracture of metacarpal bone(s) NOS                    |
| 36 | 43423 S4D1300  | Open fracture-dislocation, distal interphalangeal joint      |
| 37 | 66099 S353F00  | Open fracture metatarsal, multiple                           |
| 38 | 62689 SH31600  | Superficial burn of the scapular region                      |
| 39 | 67461 SB31000  | Closed injury, brachial artery                               |
| 40 | 100350 S4C2y00 | Closed fracture-subluxation other carpal                     |
| 41 | 94381 S900z00  | Open wound of shoulder and upper limb NOS                    |
| 42 | 33931 SH41000  | Superficial burn of the hand, unspecified                    |
| 43 | 43175 7L0H800  | Open reduction congenital dislocation of patella             |
| 44 | 106178 TK01z00 | Suicide and self inflicted injury by barbiturates            |
| 45 | 94127 S133y00  | Other specified open fracture of pubis                       |
| 46 | 6660 7K1L400   | Closed reduction of fracture of hip                          |
| 47 | 10382 S22z.00  | Fracture of humerus NOS                                      |
| 48 | 94655 S135800  | Open fracture dislocation of sacro-iliac joint               |
| 49 | 94460 S201z00  | Open fracture of clavicle NOS                                |
| 50 | 6392 S250.00   | Closed fracture of metacarpal bone(s)                        |
| 51 | 6388 SH4z.00   | Burn of wrist or hand NOS                                    |
| 52 | 45723 S12z.00  | Fracture of rib(s), sternum, larynx or trachea NOS           |



|    |                |                                                              |
|----|----------------|--------------------------------------------------------------|
| 1  |                |                                                              |
| 2  | 94585 S491x00  | Open dislocation of multiple cervical vertebrae              |
| 3  | 100345 S421300 | Open traumatic dislocation elbow joint, medial               |
| 4  | 6312 SD6yz00   | Superficial injury of lower limb, without infection, NOS     |
| 5  | 55442 SH32200  | Superficial partial thickness burn of the elbow              |
| 6  | 53948 SD6z200  | Superficial injury of knee NOS, infected                     |
| 7  | 44538 S230A00  | Closed fracture radius and ulna, proximal                    |
| 8  | 99591 SB30000  | Axillary vessel injury, unspecified                          |
| 9  | 25414 SA22.11  | Open wound of foot with tendon injury                        |
| 10 | 99508 7K6Gd00  | Primary closed reduction # dislocation+other extrnal immobil |
| 11 | 59613 S72y.00  | Multiple intrathoracic organ injury with open wnd to cavity  |
| 12 | 63402 S490600  | Closed dislocation C5/C6                                     |
| 13 | 5567 S01..19   | Temporal bone fracture                                       |
| 14 | 6195 S2...00   | Fracture of upper limb                                       |
| 15 | 62977 S010.00  | Closed fracture base of skull without intracranial injury    |
| 16 | 70946 TKx0.00  | Suicide + selfinflicted injury-jump/lie before moving object |
| 17 | 100159 S321100 | Open fracture patella, proximal pole                         |
| 18 | 96135 S751000  | Spleen injury with open wound into cavity, unspecified       |
| 19 | 33788 SF23100  | Closed crush injury, thumb                                   |
| 20 | 41558 S4D2000  | Closed fracture-subluxation digit, unspecified               |
| 21 | 91156 SH34300  | Deep full thickness burn of upper arm, no loss of body part  |
| 22 | 56079 TN2y.00  | Injury ?accidental, poisoning by other spec gas or vapour    |
| 23 | 34726 F552200  | Ear ossicle dislocation                                      |
| 24 | 63633 S331600  | Open fracture spine, tibia                                   |
| 25 | 29701 J012.00  | Abrasion of teeth                                            |
| 26 | 6196 SC20.11   | Late effect of head injury                                   |
| 27 | 27810 SJ61.00  | Femoral nerve injury                                         |
| 28 | 49571 SF32400  | Open crush injury, foot                                      |
| 29 | 5938 S5Q6.00   | Injury of tendon of the rotator cuff of shoulder             |
| 30 | 71630 SH42.11  | Blister of wrist and hand, second degree burn                |
| 31 | 4629 7K1L.00   | Other closed reduction of fracture of bone                   |
| 32 | 71500 S760z00  | Kidney injury without mention of open wound into cavity NOS  |
| 33 | 4582 S26z.00   | Fracture of one or more phalanges of hand NOS                |
| 34 | 62076 SB1y000  | Intercostal artery injury                                    |
| 35 | 52810 S81..11  | Ocular open wound                                            |
| 36 | 3253 SJz..00   | Nerve and spinal cord injury NOS                             |
| 37 | 12614 SD01000  | Abrasion of face, infected                                   |
| 38 | 104120 SH12A00 | Deep partial thickness burn of unspecified part of face/head |
| 39 | 99404 SJ62100  | Open injury posterior tibial nerve                           |
| 40 | 52912 S441000  | Open traumatic dislocation of finger, unspecified            |
| 41 | 104755 S113A00 | Opn spinal fracture with posterior thorac cord lesion, T7-12 |
| 42 | 21679 S440400  | Closed traumatic dislocation, proximal interphalangeal joint |
| 43 | 53976 S101200  | Open fracture axis                                           |
| 44 | 17424 N083A00  | Recurrent dislocation of shoulder - anterior                 |
| 45 | 70196 SD1z100  | Superficial injury of chest wall NOS, infected               |
| 46 | 22182 SD21200  | Abrasion of axilla, infected                                 |
| 47 | 15927 S352.00  | Closed fracture of other tarsal and metatarsal bones         |
| 48 | 73052 SJ67400  | Injury of other nerves at ankle and foot level               |
| 49 | 5320 SE33200   | Contusion, fingernail (includes subungual haematoma)         |
| 50 | 66231 S353400  | Open fracture medial cuneiform                               |
| 51 | 31797 S04..11  | Multiple face fractures                                      |

|    |                |                                                            |
|----|----------------|------------------------------------------------------------|
| 1  |                |                                                            |
| 2  | 9347 SD81100   | Superficial laceration of cornea                           |
| 3  | 3008 S646.00   | Head injury                                                |
| 4  | 67321 S420100  | Closed traumatic dislocation elbow joint, anterior         |
| 5  | 5140 TN61.00   | Injury ?accidental, by stabbing instrument                 |
| 6  | 17249 S4H..00  | Fracture-dislocation or subluxation foot                   |
| 7  | 42972 S311.00  | Open fracture of femur, shaft or unspecified part          |
| 8  | 475 S4...00    | Dislocations and subluxations                              |
| 9  | 15860 SE00.00  | Contusion, forehead                                        |
| 10 | 70485 SH33300  | Full thickness burn of the upper arm                       |
| 11 | 4954 SE21.00   | Contusion, chest wall                                      |
| 12 | 4896 SD00000   | Abrasion, face                                             |
| 13 | 4310 S352300   | Closed fracture cuboid                                     |
| 14 | 24728 SF00000  | Crush injury, cheek                                        |
| 15 | 4869 S8z..11   | Laceration NOS                                             |
| 16 | 70954 S933100  | Degloving injury, finger, multiple                         |
| 17 | 17438 S835400  | Open wound of lip with complication                        |
| 18 | 51657 S496600  | Closed traumatic dislocation costo-vertebral joint         |
| 19 | 73152 TM5z.00  | Injury due to legal intervention by other means NOS        |
| 20 | 41698 S134300  | Closed fracture pelvis, ischial tuberosity                 |
| 21 | 2888 S25..00   | Fracture of metacarpal bone                                |
| 22 | 70860 S735200  | Transverse colon injury with open wound into cavity        |
| 23 | 54145 S331200  | Open fracture of tibia and fibula, proximal                |
| 24 | 28398 SK1x500  | Multiple open wounds of abdomen, lower back and pelvis     |
| 25 | 98032 SB0y.00  | Other head and neck blood vessel injury                    |
| 26 | 35620 S342100  | Closed fracture ankle, lateral malleolus, high             |
| 27 | 70653 S221700  | Open fracture proximal humerus, four part                  |
| 28 | 4707 SH20200   | Unspecified thickness burn of the chest wall               |
| 29 | 4641 7K1T100   | Debridement of open fracture                               |
| 30 | 72525 S130000  | Closed fracture acetabulum, anterior lip alone             |
| 31 | 17535 S9...12  | Open wound of arm                                          |
| 32 | 12654 S836.00  | Open wound in mouth                                        |
| 33 | 45517 S3x..00  | Other, multiple and ill-defined fractures of lower limb    |
| 34 | 12744 S8...00  | Open wound of head, neck and trunk                         |
| 35 | 71071 S902.00  | Open wound of shoulder/upper limb with tendon involvement  |
| 36 | 105131 SH45.14 | Deep third degree burn of wrist with loss of a body part   |
| 37 | 58964 SH22600  | Superficial partial thickness burn of the genitalia        |
| 38 | 97476 S4C1300  | Open fracture-dislocation carpometacarpal joint            |
| 39 | 4379 SH20500   | Unspecified thickness burn of the buttock                  |
| 40 | 4352 SH30.00   | Unspecified thickness burn of the arm                      |
| 41 | 6743 S521.11   | Tendon injury - hand                                       |
| 42 | 65531 SB4x000  | Injury of multiple blood vessels at hip and thigh level    |
| 43 | 49840 S02y000  | Fracture of alveolus, open                                 |
| 44 | 38355 S312500  | Closed fracture distal femur, lateral condyle              |
| 45 | 49256 S4C1100  | Open fracture-dislocation radiocarpal joint                |
| 46 | 43570 S230.00  | Closed fracture of proximal radius and ulna                |
| 47 | 51189 SF1z.00  | Crush injury, trunk NOS                                    |
| 48 | 29899 S200300  | Closed fracture clavicle, lateral end                      |
| 49 | 14834 S108.00  | Closed fracture pelvis, coccyx                             |
| 50 | 29103 7K1KE00  | Primary closed reduction of fracture and external fixation |
| 51 | 106283 S023700 | Open fracture of mandible, alveolar border of body         |

|    |                |                                                              |
|----|----------------|--------------------------------------------------------------|
| 1  |                |                                                              |
| 2  | 27736 S834z00  | Open wound of face, NOS                                      |
| 3  | 62337 S110000  | Cls spinal fracture with unspec cervical cord lesion, C1-4   |
| 4  | 3888 S104.00   | Closed fracture lumbar vertebra                              |
| 5  | 24861 SB3W.00  | Injury of unspecified blood vessel at wrist & hand level     |
| 6  | 3767 SA00100   | Open wound of thigh                                          |
| 7  |                |                                                              |
| 8  | 41888 7K1G200  | Primary open reduction+external fixation of femoral fracture |
| 9  | 40304 S261K00  | Open fracture finger middle phalanx                          |
| 10 | 53622 S221100  | Open fracture proximal humerus, neck                         |
| 11 | 55737 SB20.00  | Abdominal aorta injury                                       |
| 12 |                |                                                              |
| 13 | 30204 SE32200  | Contusion hand, palm                                         |
| 14 | 67079 SD10700  | Abrasion, flank                                              |
| 15 | 32009 SR10.00  | Fractures involving head with neck                           |
| 16 | 34416 S750000  | Spleen injury without open wound into cavity, unspecified    |
| 17 | 44700 S261E00  | Open fracture finger proximal phalanx, base                  |
| 18 |                |                                                              |
| 19 | 7928 SE43.00   | Contusion, toe                                               |
| 20 | 15877 S106.00  | Closed fracture sacrum                                       |
| 21 | 12728 SA0..00  | Open wound of hip and thigh                                  |
| 22 | 17952 S23x100  | Closed fracture of radius (alone), unspecified               |
| 23 |                |                                                              |
| 24 | 5301 S302.00   | Closed fracture of proximal femur, pertrochanteric           |
| 25 | 44730 SF23400  | Open crush injury, thumb                                     |
| 26 | 3180 SA10200   | Open wound of ankle                                          |
| 27 | 73097 TN72.00  | Injury ?accidental, fall from natural site                   |
| 28 | 49936 SD21000  | Abrasion of shoulder, infected                               |
| 29 | 33768 S330600  | Closed fracture spine, tibia                                 |
| 30 |                |                                                              |
| 31 | 51773 SJ1..00  | Injury to other cranial nerves                               |
| 32 | 19243 SC30.00  | Late effect of internal chest injury                         |
| 33 | 37904 S022x00  | Closed fracture of mandible, multiple sites                  |
| 34 | 48778 S73..00  | Gastrointestinal tract injury                                |
| 35 |                |                                                              |
| 36 | 2862 S234700   | Closed Smith's fracture                                      |
| 37 | 2771 S92..00   | Open wound of hand, excluding finger(s)                      |
| 38 | 24615 S4J1200  | Open fracture-dislocation sterno-clavicular joint, anterior  |
| 39 | 104681 SB2y000 | Ovarian artery injury                                        |
| 40 | 53623 7K6Fy00  | Primary open reduction of traumatic dislocation of joint OS  |
| 41 | 40445 S4H1000  | Open fracture-dislocation, subtalar joint                    |
| 42 |                |                                                              |
| 43 | 96755 SC33.00  | Late effect of injury to blood vessel head/neck/extremities  |
| 44 | 107964 S780100 | Adrenal gland injury without mention of open wound to cavity |
| 45 | 105046 SH32x00 | Partial thickness burn of multiple sites of the arm          |
| 46 | 61389 7J42M00  | Primary cls reduc spinal fracture+skull traction stabilisatn |
| 47 | 52774 SH54400  | Deep full thickness burn of lower leg without loss of body   |
| 48 |                |                                                              |
| 49 | 34233 S450.00  | Closed traumatic dislocation of hip                          |
| 50 | 16980 SH21100  | Superficial burn of the breast                               |
| 51 | 41167 SJ12.00  | Trigeminal (5th) nerve injury                                |
| 52 | 43681 S260500  | Closed fracture thumb proximal phalanx, shaft                |
| 53 |                |                                                              |
| 54 | 35789 S4A2.00  | Closed fracture-subluxation shoulder                         |
| 55 | 27361 7J12y00  | Other specified reduction of fracture of mandible            |
| 56 | 60562 S490500  | Closed dislocation C4/C5                                     |
| 57 |                |                                                              |
| 58 | 2325 S834000   | Open wound of face, unspecified                              |
| 59 | 44943 S260H00  | Closed fracture finger proximal phalanx, head                |
| 60 | 18221 SB4..00  | Injury to blood vessels of leg                               |
|    | 3435 SD6y100   | Superficial injury thigh NOS                                 |

|    |                |                                                             |
|----|----------------|-------------------------------------------------------------|
| 1  |                |                                                             |
| 2  | 33341 SC02.00  | Late effect of fracture of arm                              |
| 3  | 97456 S913200  | Degloving injury wrist, volar                               |
| 4  | 11044 S220300  | Closed fracture proximal humerus, greater tuberosity        |
| 5  | 28518 S912000  | Open wound of forearm with tendon involvement               |
| 6  | 2131 S5yz100   | Muscle injury / strain                                      |
| 7  |                |                                                             |
| 8  | 69432 S111.00  | Open fracture of cervical spine with spinal cord lesion     |
| 9  | 66493 SJ20000  | Unspecified cervical cord injury, without bony injury, C1-4 |
| 10 | 2101 S226.00   | Fracture of upper end of humerus                            |
| 11 | 17388 S40..13  | Dislocation of temporomandibular joint                      |
| 12 | 40403 7K6FJ00  | Primary open reduction of # dislocation+wire fixation       |
| 13 | 11724 SF0..00  | Crush injury, face, scalp and neck                          |
| 14 | 73344 7J43y00  | Other specified fixation of fracture of spine               |
| 15 | 1994 S30..11   | Hip fracture                                                |
| 16 | 16553 S64..12  | Head injury NOS                                             |
| 17 |                |                                                             |
| 18 | 34356 S260N00  | Closed fracture finger middle phalanx, neck                 |
| 19 | 95622 SB22.00  | Coeliac or mesenteric artery injury                         |
| 20 | 53433 S411400  | Open traumatic dislocation acromio-clavicular joint         |
| 21 | 62899 SE30z00  | Contusion, shoulder and upper arm NOS                       |
| 22 | 7211 SF22100   | Crush injury, wrist                                         |
| 23 |                |                                                             |
| 24 | 17267 SC1..11  | Late effects of skin injury                                 |
| 25 | 1591 S130.00   | Closed fracture acetabulum                                  |
| 26 | 59619 S82wz00  | Other open wound of ear with complication NOS               |
| 27 | 54805 PF53100  | Radioulnar synostosis and dislocation of radial head        |
| 28 | 16141 7K1Gz00  | Other primary open reduction of fracture of bone NOS        |
| 29 | 21815 S450100  | Closed traumatic dislocation hip joint, posterior           |
| 30 | 56509 S641z00  | Intracranial inj NOS + open intracran wnd+concussion unspec |
| 31 | 110609 S73x200 | Pancreas body injury without open wound into cavity         |
| 32 | 10823 7K6H.00  | Secondary reduction of traumatic dislocation of joint       |
| 33 | 1435 S....00   | Injury and poisoning                                        |
| 34 | 96123 S900400  | Multiple open wounds of shoulder and upper arm              |
| 35 | 64378 S352G00  | Closed tarsal fractures, multiple                           |
| 36 | 1177 S21..00   | Fracture of scapula                                         |
| 37 | 1163 SK17300   | Other foot injury                                           |
| 38 | 1136 SF4z.11   | Crush injury                                                |
| 39 | 100555 SJ5A.00 | Intercostobrachial nerve injury                             |
| 40 | 63345 S725.00  | Injury of thoracic trachea                                  |
| 41 | 7010 SD7y000   | Superficial injury of foot NOS                              |
| 42 | 96450 SH13500  | Full thickness burn of the nose                             |
| 43 | 37734 S835500  | Open wound of jaw with complication                         |
| 44 | 33602 7K1G400  | Primary open reduction of fracture and cast immobilisation  |
| 45 | 28375 S13y.00  | Closed fracture of pelvis NOS                               |
| 46 | 50148 S4C2100  | Closed fracture-subluxation radiocarpal joint               |
| 47 | 51299 S003.00  | Open fracture vault of skull with intracranial injury       |
| 48 | 5344 S210400   | Closed fracture scapula, blade                              |
| 49 | 850 S41..00    | Dislocation or subluxation of shoulder                      |
| 50 | 73710 SJ4z.00  | Trunk nerve injury NOS                                      |
| 51 | 30390 SH41.13  | First degree burn of hand                                   |
| 52 | 49293 SB47.00  | Injury of blood vessels at lower leg level                  |
| 53 | 63978 SH14100  | Deep full thickness burn of ear without loss of body part   |
| 54 | 51150 SD2y100  | Superficial injury of scapular NOS                          |
| 55 |                |                                                             |
| 56 |                |                                                             |
| 57 |                |                                                             |
| 58 |                |                                                             |
| 59 |                |                                                             |
| 60 |                |                                                             |

|    |                |                                                              |
|----|----------------|--------------------------------------------------------------|
| 1  |                |                                                              |
| 2  | 1479 S46..00   | Dislocation or subluxation of knee                           |
| 3  | 99459 S261P00  | Open fracture finger middle phalanx, head                    |
| 4  | 68556 S201300  | Open fracture clavicle, lateral end                          |
| 5  | 92043 S4H1200  | Open fracture-dislocation, tarsometatarsal joint             |
| 6  | 46277 SK18.00  | Injury of muscle and tendon of head                          |
| 7  | 62045 S760.00  | Closed injury of kidney                                      |
| 8  | 36497 7K1Jz00  | Closed reduction of bone fracture and internal fixation NOS  |
| 9  | 27998 SJ56500  | Open injury, digital nerve, multiple                         |
| 10 | 40419 SH10200  | Unspecified thickness burn of the eye                        |
| 11 | 54185 SB45.00  | Tibial blood vessel injury                                   |
| 12 | 93752 7J42y00  | Other specified other reduction of fracture of spine         |
| 13 | 50409 SA12200  | Open wound of ankle with tendon involvement                  |
| 14 | 517 S22..00    | Fracture of humerus                                          |
| 15 | 37297 7J12z00  | Reduction of fracture of mandible NOS                        |
| 16 | 30186 7403600  | Outfracture of turbinates of nose                            |
| 17 | 482 S26..12    | Thumb fracture excluding base                                |
| 18 | 99565 S732100  | Duodenum injury without mention of open wound into cavity    |
| 19 | 441 S26..00    | Fracture of one or more phalanges of hand                    |
| 20 | 71359 SJ52500  | Open injury, ulnar nerve, dorsal sensory                     |
| 21 | 36556 S261000  | Open fracture of phalanx or phalanges, unspecified           |
| 22 | 48903 S463100  | Closed traumatic dislocation patello-femoral joint, medial   |
| 23 | 8648 S302400   | Closed fracture of femur, intertrochanteric                  |
| 24 | 64021 S211200  | Open fracture scapula, coracoid                              |
| 25 | 47645 S938.00  | Open wound of thumb with damage to nail                      |
| 26 | 357 SH10000    | Unspecified thickness burn of unspecified part of face/head  |
| 27 | 10102 7K1Ky00  | Closed reduction of bone fracture and external fixation OS   |
| 28 | 36686 SH30600  | Unspecified thickness burn of the scapular region            |
| 29 | 103049 SR15000 | Cl fractures involving multiple regions upper with lower lmb |
| 30 | 55280 S109.00  | Open fracture pelvis, coccyx                                 |
| 31 | 45742 SJ43.00  | Lateral cutaneous branch T12 injury                          |
| 32 | 65988 S894400  | Open wound of flank without complication                     |
| 33 | 4304 S33x100   | Closed fracture of fibula, unspecified part, NOS             |
| 34 | 50492 SH11z00  | Superficial burn of the face, head or neck NOS               |
| 35 | 45314 S912.00  | Open wound of lower arm with tendon involvement              |
| 36 | 34835 SJ2..00  | Spinal cord injury without evidence of spinal bone injury    |
| 37 | 48586 SD0zz00  | Superficial injury of head NOS, infection NOS                |
| 38 | 54189 S496500  | Closed traumatic dislocation laryngeal cartilage             |
| 39 | 56373 SD11B12  | Abrasion or friction burn of testis, infected                |
| 40 | 11296 S100.00  | Closed fracture of cervical spine                            |
| 41 | 197 S8z..13    | Laceration                                                   |
| 42 | 19174 SF21000  | Crush injury, forearm                                        |
| 43 | 137 S23x111    | Fracture of radius NOS                                       |
| 44 | 36698 7K1Dz00  | Prim open reduction fracture bone & intramedull fixation NOS |
| 45 | 110200 S465500 | Closed traumatic dislocation knee joint, rotatory            |
| 46 | 60382 S101311  | C3 vertebra open fracture without spinal cord lesion         |
| 47 | 55740 SH22100  | Superficial partial thickness burn of the breast             |
| 48 | 16020 S48..00  | Dislocation or subluxation of foot                           |
| 49 | 17961 7K6G400  | Closed reduction of dislocation of elbow                     |
| 50 | 36328 S23xz00  | Closed fracture of radius and ulna, NOS                      |
| 51 | 25889 SJ56.00  | Digital nerve injury                                         |



|    |                |                                                             |
|----|----------------|-------------------------------------------------------------|
| 1  |                |                                                             |
| 2  | 31331 S494000  | Closed dislocation of spine, unspecified                    |
| 3  | 39859 S04..12  | Multiple skull fractures                                    |
| 4  | 28260 S8z..00  | Open wound of head, neck and trunk NOS                      |
| 5  | 10385 S8...11  | Laceration of head, neck and trunk                          |
| 6  | 28299 S8A..00  | Open wounds involving head with neck                        |
| 7  | 28307 S200200  | Closed fracture clavicle, shaft                             |
| 8  | 24050 SD31200  | Abrasion of wrist, infected                                 |
| 9  | 60608 S140.00  | Closed fracture of ill-defined bone of trunk                |
| 10 | 100677 N331.13 | Sponaneous fracture                                         |
| 11 | 48217 S225600  | Open fracture distal humerus, lateral epicondyle            |
| 12 | 70981 S837000  | Open wound in mouth with complication, unspecified          |
| 13 | 89260 S84y.00  | Other open wound of neck with complication                  |
| 14 | 50473 SH11900  | Superficial burn of the neck                                |
| 15 | 58957 S010100  | Closed #skull bse no intracranial injury, no loss of consc  |
| 16 | 40260 F4K3200  | Anterior dislocation of lens                                |
| 17 | 40267 S4E0.00  | Closed fracture-dislocation, hip joint                      |
| 18 | 107337 S647.00 | Acquired brain injury                                       |
| 19 | 36120 S40..11  | Dislocation of mandible                                     |
| 20 | 40294 S832000  | Open wound of nose, unspecified                             |
| 21 | 47917 SC03.00  | Late effect of fracture neck of femur                       |
| 22 | 99161 S331900  | Open fracture fibula, neck                                  |
| 23 | 65297 S4J3100  | Open fracture-subluxation of pelvis                         |
| 24 | 37686 S01..18  | Sphenoid bone fracture                                      |
| 25 | 99904 S741100  | Liver haematoma and contusion with open wound into cavity   |
| 26 | 40351 SH11700  | Superficial burn of the forehead                            |
| 27 | 65302 S105100  | Open fracture lumbar vertebra, wedge                        |
| 28 | 21344 SJ5..11  | Arm peripheral nerve injury                                 |
| 29 | 40362 S496300  | Closed traumatic dislocation, sterno-clavicular joint, ant  |
| 30 | 62413 SH52800  | Deep partial thickness burn of the toe(s)                   |
| 31 | 54553 S023x00  | Open fracture of mandible, multiple sites                   |
| 32 | 70481 S835x00  | Multiple open wounds of face with complication              |
| 33 | 40374 S465400  | Closed traumatic dislocation knee joint, lateral            |
| 34 | 98776 S001200  | Closed #skull vlt + intracranial injury, <1hr loss of consc |
| 35 | 72045 S77z.00  | Pelvic organ injury NOS                                     |
| 36 | 110204 TN3z.00 | Injury ?accidental, hanging/strangulation/suffocation NOS   |
| 37 | 18394 S224200  | Closed fracture distal humerus, lateral condyle             |
| 38 | 4849 N338000   | Malunion of fracture                                        |
| 39 | 37310 S3z0.00  | Closed fracture of bones, unspecified                       |
| 40 | 33656 S330100  | Closed fracture proximal fibula                             |
| 41 | 28741 S23y200  | Open fracture of ulna (alone), unspecified                  |
| 42 | 40485 SH41300  | Superficial burn of more than one finger                    |
| 43 | 37495 SE22z00  | Contusion, abdominal wall NOS                               |
| 44 | 52936 SD2z200  | Superficial injury of axilla NOS, infected                  |
| 45 | 62666 7K6HF00  | Revision to open reduction of dislocation alone             |
| 46 | 73986 S4D3.00  | Open fracture-subluxation digit                             |
| 47 | 66114 S002000  | Open #skull vlt no intracranial injury, unspec state consc  |
| 48 | 94393 S251x00  | Open fractures of multiple sites of unspecified metacarpus  |
| 49 | 20117 SE08.00  | Other contusion neck                                        |
| 50 | 47851 SH51400  | Superficial burn of the lower leg                           |
| 51 | 61279 S261300  | Open fracture thumb proximal phalanx                        |

|    |                |                                                              |
|----|----------------|--------------------------------------------------------------|
| 1  |                |                                                              |
| 2  | 17383 SC13.11  | Late effect of bruising                                      |
| 3  | 953 S3z1.00    | Open fracture of bones, unspecified                          |
| 4  | 98289 SJ33400  | Sacral nerve root injury - S5                                |
| 5  | 48941 SH84.00  | Burn involving 40-49% of body surface (BS)                   |
| 6  | 99295 SH55.00  | Deep full thickness burn of leg, with loss of body part      |
| 7  | 52545 SJ66X00  | Injury of unspecified nerve at lower leg level               |
| 8  | 22329 S312.11  | Closed fracture of femur, distal end                         |
| 9  | 52672 S523D00  | Volar plate injury, thumb, metacarpophalangeal joint         |
| 10 | 44949 S02B.00  | Le Fort II fracture maxilla                                  |
| 11 | 40752 S4J..00  | Other fracture-dislocation or subluxation                    |
| 12 | 57299 S710.00  | Heart injury, closed                                         |
| 13 | 40786 SJ50.00  | Axillary nerve injury                                        |
| 14 | 40817 S4D2400  | Closed fracture-subluxation, proximal interphalangeal joint  |
| 15 | 94061 SD10000  | Abrasion, interscapular                                      |
| 16 | 91794 SA02100  | Open wound of thigh with tendon involvement                  |
| 17 | 34685 S133000  | Open fracture pelvis, single pubic ramus                     |
| 18 | 32407 S910400  | Open wound of wrist, dorsal                                  |
| 19 | 71080 S723.00  | Open injury other intra-thoracic structure                   |
| 20 | 50131 SF22200  | Closed crush injury wrist, dorsum                            |
| 21 | 57883 SC18.00  | Late effect of other burns                                   |
| 22 | 41241 TKz..00  | Suicide and selfinflicted injury NOS                         |
| 23 | 7564 S242100   | Fracture of first metacarpal bone                            |
| 24 | 5311 SJ42.00   | Intercostal nerve injury                                     |
| 25 | 27620 S210.00  | Closed fracture of scapula                                   |
| 26 | 17036 8HB9.00  | Fracture therapy follow-up                                   |
| 27 | 11815 SA3..11  | Open wound of toenail                                        |
| 28 | 60171 SJ53200  | Open injury, radial nerve                                    |
| 29 | 41706 SD50100  | Abrasion, thumb                                              |
| 30 | 22393 7K1JH00  | Primary wire fixation of fracture                            |
| 31 | 104070 S235C00 | Open fracture distal radius, intra-articular, die-punch      |
| 32 | 52353 SH31z00  | Superficial burn of the arm NOS                              |
| 33 | 52346 S346100  | Closed fracture ankle, trimalleolar, high fibular fracture   |
| 34 | 7159 S363.00   | Fracture of other toe                                        |
| 35 | 37582 S4D1400  | Open fracture-dislocation, proximal interphalangeal joint    |
| 36 | 10167 S24..11  | Hand fracture - carpal bone                                  |
| 37 | 41720 SD01.11  | Abrasion or friction burn of head, infected                  |
| 38 | 41753 S49..00  | Other, multiple and ill-defined dislocations or subluxations |
| 39 | 30363 7L0G000  | Open reduction of congenital dislocation of hip              |
| 40 | 94573 SJ56000  | Closed injury, common digital nerve                          |
| 41 | 96569 S481A00  | Open traumatic dislocation, subtalar joint                   |
| 42 | 97289 S421y00  | Other open traumatic dislocation of elbow                    |
| 43 | 27602 S932.11  | Open wound of finger with tendon injury                      |
| 44 | 2660 S28z.00   | Ill-defined fractures of upper limb NOS                      |
| 45 | 17524 S831.00  | Open wound of scalp with complication                        |
| 46 | 60556 SF20400  | Closed crush injury, shoulder area                           |
| 47 | 41906 SD0y.00  | Superficial injury of head NOS                               |
| 48 | 41907 SA20300  | Open wound, heel                                             |
| 49 | 71824 SJ59000  | Closed injury, long thoracic nerve                           |
| 50 | 73479 S130200  | Closed fracture acetabulum, anterior column                  |
| 51 | 31766 S464.00  | Open traumatic dislocation of patello-femoral joint          |



|    |                |                                                              |
|----|----------------|--------------------------------------------------------------|
| 1  |                |                                                              |
| 2  | 55102 SF3z.00  | Crush injury, lower limb NOS                                 |
| 3  | 42867 SB4X.00  | Injury of unspecified blood vessel at hip & thigh level      |
| 4  | 70795 SJ52300  | Closed injury, ulnar nerve, deep motor                       |
| 5  | 12767 SD51.00  | Abrasion or friction burn of finger, infected                |
| 6  |                |                                                              |
| 7  | 55644 SH12111  | Ear - 2nd degree burn                                        |
| 8  | 34195 S134800  | Closed fracture dislocation of sacro-iliac joint             |
| 9  | 60627 S615.00  | Open hindbrain contusion                                     |
| 10 | 28196 SJ31.11  | Dorsal nerve root injury                                     |
| 11 | 28149 7K6G000  | Primary closed reduction # dislocation jnt+skeletal traction |
| 12 |                |                                                              |
| 13 | 2887 7K1L100   | Manipulation of fracture of bone NEC                         |
| 14 | 1548 S228.00   | Fracture of lower end of humerus                             |
| 15 | 42186 7K1Jy00  | Closed reduction of bone fracture and internal fixation OS   |
| 16 | 21040 SH42.00  | Partial thickness burn of the wrist and hand                 |
| 17 | 10735 S21..11  | Shoulder blade fracture                                      |
| 18 |                |                                                              |
| 19 | 52650 TG80D00  | Accidental burning or scalding by steam from car radiator    |
| 20 | 520 S31z.00    | Fracture of femur, NOS                                       |
| 21 | 69362 7K6H411  | Remanipulation of fracture dislocation alone                 |
| 22 | 20249 SH93.00  | Full thickness burn NOS                                      |
| 23 |                |                                                              |
| 24 | 42430 SC15.11  | Late effect of burn of head or neck                          |
| 25 | 2215 SH90.00   | Unspecified degree of burn NOS                               |
| 26 | 37986 S261800  | Open fracture thumb distal phalanx                           |
| 27 | 70883 SJ1y.00  | Other specified cranial nerve injury                         |
| 28 | 56998 SH43300  | Full thickness burn of more than one finger                  |
| 29 | 28118 S333000  | Open fracture shaft of tibia                                 |
| 30 |                |                                                              |
| 31 | 65769 S833300  | Open wound of nasal sinus with complication                  |
| 32 | 60804 SH30x00  | Unspecified thickness burn of multiple sites of the arm      |
| 33 | 64777 S131z00  | Open fracture acetabulum NOS                                 |
| 34 | 42937 TK71.00  | Suicide+selfinflicted injury-jump from oth manmade structure |
| 35 | 63985 TD15.00  | Burning caused by conflagration in other structure/building  |
| 36 |                |                                                              |
| 37 | 17057 SF31100  | Crush injury, knee                                           |
| 38 | 9174 S3x4.00   | Multiple fractures of foot                                   |
| 39 | 12113 SD20300  | Abrasion, upper arm                                          |
| 40 | 12689 S44..11  | Dislocation of thumb                                         |
| 41 | 58831 TN80.00  | Injury ?accidental, by jumping or lying before moving object |
| 42 | 42902 S4H1400  | Open fracture-dislocation, IPJ, single toe                   |
| 43 | 10933 SD6y000  | Superficial injury of hip NOS                                |
| 44 |                |                                                              |
| 45 | 27558 7K6G500  | Closed reduction of dislocation of wrist                     |
| 46 | 6667 S132100   | Closed fracture pelvis, multiple pubic rami - stable         |
| 47 | 42957 S230z00  | Closed fracture of proximal forearm not otherwise specified  |
| 48 |                |                                                              |
| 49 | 103264 SA23000 | Degloving injury foot, plantar                               |
| 50 | 60535 N083.11  | Redislocation of joint                                       |
| 51 | 42968 S104000  | Closed fracture lumbar vertebra, burst                       |
| 52 | 66292 S490000  | Closed dislocation of cervical spine, unspecified            |
| 53 |                |                                                              |
| 54 | 6446 SA3..00   | Open wound of toe(s)                                         |
| 55 | 12502 S836200  | Open wound of gum                                            |
| 56 | 36772 S023.11  | Fracture of lower jaw, open                                  |
| 57 | 14906 SE22.00  | Contusion, abdominal wall                                    |
| 58 | 909 S23z.00    | Fracture of radius and ulna, NOS                             |
| 59 | 44059 S114.00  | Closed fracture of lumbar spine with spinal cord lesion      |
| 60 | 99957 SJ6x.00  | Other pelvic girdle and lower limb peripheral nerve injury   |

|    |                |                                                              |
|----|----------------|--------------------------------------------------------------|
| 1  |                |                                                              |
| 2  | 29091 S022000  | Closed fracture mandible (site unspecified)                  |
| 3  | 43342 S837200  | Open wound of gum with complication                          |
| 4  | 43596 S421000  | Open traumatic dislocation of elbow, unspecified             |
| 5  | 43418 S624.11  | Epidural haematoma following injury                          |
| 6  | 44844 S234C00  | Closed fracture distal radius, intra-articular, die-punch    |
| 7  | 44826 S121200  | Open fracture of two ribs                                    |
| 8  | 7576 SD...15   | Friction burns                                               |
| 9  | 43355 TN85.00  | Injury ?accidental, by crashing of motor vehicle             |
| 10 | 72392 SJ41z00  | Sympathetic nerve injury NOS                                 |
| 11 | 65493 7G2C500  | Tangent excision of burnt skin of head or neck               |
| 12 | 63071 S4D2500  | Closed fracture-subluxation, interphalangeal joint thumb     |
| 13 | 9917 S347.00   | Open fracture ankle, trimalleolar                            |
| 14 | 94236 S4J1000  | Open fracture-dislocation of sternum                         |
| 15 | 106186 SB1y500 | Hemiazygos vein injury                                       |
| 16 | 17921 S4C2.00  | Closed fracture-subluxation of the wrist                     |
| 17 | 43730 7J03300  | Reduction of closed fracture of orbit bone                   |
| 18 | 43735 SH41200  | Superficial burn of the thumb                                |
| 19 | 43741 SJ10.11  | Third cranial nerve injury                                   |
| 20 | 8255 S10..00   | Fracture of spine without mention of spinal cord injury      |
| 21 | 44841 SH43400  | Full thickness burn of the thumb and finger(s)               |
| 22 | 67011 S261x00  | Open fracture of phalanx or phalanges, multiple sites        |
| 23 | 37662 S310000  | Closed fracture of femur, unspecified part                   |
| 24 | 21248 SJ51.00  | Median nerve injury                                          |
| 25 | 97120 S101211  | C2 vertebra open fracture without spinal cord lesion         |
| 26 | 46456 TKx1.00  | Suicide and selfinflicted injury by burns or fire            |
| 27 | 103279 SH24000 | Deep full thickness burn of trunk unsp, no loss of body part |
| 28 | 48739 S933300  | Ring avulsion injury, class 2                                |
| 29 | 44156 S241400  | Open fracture pisiform                                       |
| 30 | 44226 S86z.00  | Open wound of back NOS                                       |
| 31 | 44276 S331300  | Open fracture proximal tibia, medial condyle (plateau)       |
| 32 | 34351 S300600  | Closed fracture proximal femur, subcapital, Garden grade I   |
| 33 | 106986 S710300 | Heart laceration, closed with penetration of heart chamber   |
| 34 | 71454 TN0z.00  | Injury ?accidental, poisoning by solid or liquid subst NOS   |
| 35 | 106486 S620z00 | Subarach h'ge inj no open intracran wnd + concussion unspec  |
| 36 | 69933 SC44000  | Sequelae of burn, corrosion and frostbite of trunk           |
| 37 | 4737 S34x.00   | Closed fracture ankle, unspecified                           |
| 38 | 54198 7K6H200  | Secondary open reduction fracture dislocation of joint NEC   |
| 39 | 66774 S235z00  | Open fracture of forearm, lower end, NOS                     |
| 40 | 51946 S4D3300  | Open fracture-subluxation, distal interphalangeal joint      |
| 41 | 68428 SJ7y.00  | Multiple nerve injury NOS                                    |
| 42 | 44522 SE40.00  | Contusion, hip and thigh                                     |
| 43 | 51700 S261U00  | Open fracture finger distal phalanx, tuft                    |
| 44 | 23080 TK3..00  | Suicide + selfinflicted injury by hang/strangulate/suffocate |
| 45 | 28841 SH33100  | Full thickness burn of the forearm                           |
| 46 | 63679 S011.00  | Closed fracture base of skull with intracranial injury       |
| 47 | 73234 S301y11  | Open fracture of femur, subcapital                           |
| 48 | 42121 SE41.00  | Contusion, knee and lower leg                                |
| 49 | 33845 S260U00  | Closed fracture finger distal phalanx, tuft                  |
| 50 | 42502 SC01.00  | Late effect of fracture of spine/trunk without cord lesion   |
| 51 | 47478 S280.00  | Closed ill-defined fractures of upper limb                   |

|    |                |                                                              |
|----|----------------|--------------------------------------------------------------|
| 1  |                |                                                              |
| 2  | 47274 T032.00  | Train accident involving burning                             |
| 3  | 71282 S303200  | Open fracture proximal femur, subtrochanteric                |
| 4  | 106473 SF32500 | Open crush injury, ankle                                     |
| 5  | 44652 S4C2000  | Closed fracture-subluxation, distal radio-ulnar jt           |
| 6  | 52083 S224500  | Closed fracture of distal humerus, trochlea                  |
| 7  | 55627 S101.00  | Open fracture of cervical spine                              |
| 8  | 64222 7K1Kz00  | Closed reduction of bone fracture and external fixation NOS  |
| 9  | 27854 S134600  | Closed fracture pelvis, iliac wing                           |
| 10 | 98600 S780200  | Bile duct/gallbladder injury without open wound into cavity  |
| 11 | 55939 S353700  | Open fracture metatarsal                                     |
| 12 | 27567 S352C00  | Closed fracture metatarsal shaft                             |
| 13 | 3555 SE05.00   | Contusion, ear                                               |
| 14 | 6320 S312100   | Closed fracture of femoral condyle, unspecified              |
| 15 | 64112 S80y.00  | Other open ocular adnexa wound                               |
| 16 | 44737 S260J00  | Closed fracture finger proximal phalanx, multiple            |
| 17 | 21816 SH11000  | Superficial burn of unspecified part of the face or head     |
| 18 | 4860 SA...12   | Laceration - leg                                             |
| 19 | 100158 7K6GS00 | Primary closed reduction of dislocation and skin traction    |
| 20 | 99364 S741200  | Liver minor laceration with open wound into cavity           |
| 21 | 34429 S4C0.00  | Closed fracture dislocation of wrist                         |
| 22 | 57405 SH54200  | Deep full thickness burn of foot without loss of body part   |
| 23 | 53348 7K1Fy00  | Primary open reduction of intraarticular fracture bone OS    |
| 24 | 101109 S451z00 | Open traumatic dislocation of hip not otherwise specified    |
| 25 | 44868 SH41.00  | Superficial burn of the wrist and hand                       |
| 26 | 34371 S230400  | Closed fracture of proximal ulna, comminuted                 |
| 27 | 70282 S025.11  | Fracture of upper jaw, open                                  |
| 28 | 94450 S010200  | Closed #skull bse no intracranial injury, <1hr loss of consc |
| 29 | 16522 SAz..00  | Open wound of lower limb NOS                                 |
| 30 | 65273 SJ30000  | Cervical nerve root injury - C1                              |
| 31 | 45094 S260W00  | Closed fracture finger distal phalanx, multiple              |
| 32 | 2461 S01..00   | Fracture of base of skull                                    |
| 33 | 104988 SD1zz00 | Superficial injury of trunk NOS, infection NOS               |
| 34 | 39708 S4D0200  | Closed fracture-dislocation IPJ, unspecified                 |
| 35 | 40325 SH51.00  | Superficial burn of the leg                                  |
| 36 | 39666 S722100  | Closed injury of oesophagus                                  |
| 37 | 39458 S240900  | Closed fracture hamate, hook                                 |
| 38 | 66916 S923100  | Degloving injury hand, dorsum                                |
| 39 | 56327 S721.00  | Open injury of diaphragm                                     |
| 40 | 39396 S303400  | Open fracture of femur, intertrochanteric                    |
| 41 | 107741 S234A12 | Closed dorsal Barton fracture-subluxation                    |
| 42 | 39376 S837400  | Open wound of tongue with complication                       |
| 43 | 105406 SJ22100 | Complete lumbar cord injury without bony injury              |
| 44 | 62960 S4B0100  | Closed fracture-dislocation superior radio-ulnar joint       |
| 45 | 70436 S732.00  | Small intestine injury without open wound into cavity        |
| 46 | 39289 S430300  | Closed traumatic dislocation mid carpal joint                |
| 47 | 105816 S345100 | Open fracture ankle, bimalleolar, high fibular fracture      |
| 48 | 88998 SH12311  | Lip - 2nd degree burn                                        |
| 49 | 12607 SD70.00  | Abrasion/friction burn of foot and toe, without infection    |
| 50 | 92830 SR12000  | Closed fractures involving multiple regions of one upp limb  |
| 51 | 49870 7K1G000  | Prmy open reduction of fracture and skeletal traction        |

|    |                |                                                              |
|----|----------------|--------------------------------------------------------------|
| 1  |                |                                                              |
| 2  | 738 S13..00    | Fracture or disruption of pelvis                             |
| 3  | 43337 SF4..00  | Crush injury, multiple and unspecified sites                 |
| 4  | 38855 SH31400  | Superficial burn of the axilla                               |
| 5  | 32830 SC1A.00  | Late effect of burn of upper limb                            |
| 6  | 69638 S89vz00  | Other and unspecified open wound of trunk, NOS               |
| 7  | 38767 SD81.00  | Superficial injury of cornea                                 |
| 8  |                |                                                              |
| 9  | 109564 SH12J00 | Deep partial thickness burn of the cheek                     |
| 10 | 68671 SH40x00  | Unspecified thickness burn of multiple sites of wrist/hand   |
| 11 | 42561 S100111  | C1 vertebra closed fracture - no spinal cord lesion          |
| 12 |                |                                                              |
| 13 | 33666 S4F2.00  | Closed fracture-subluxation, knee joint                      |
| 14 | 39401 SD1yB00  | Superficial injury scrotum+testis NOS without mj open wound  |
| 15 | 48723 S7B..00  | Injury of intra-abdominal organ(s) with pelvic organ(s)      |
| 16 | 28240 SH10400  | Unspecified thickness burn of the chin                       |
| 17 | 56883 SH82z00  | Burn: 20-29% of body surface NOS                             |
| 18 | 44597 SE42.00  | Contusion, ankle and foot, excluding toe(s)                  |
| 19 | 45567 S726.00  | Injury of pleura                                             |
| 20 |                |                                                              |
| 21 | 66925 S89wz00  | Other and unspecified open wound trunk with complication NOS |
| 22 | 38433 7K1L900  | Closed reduction of fracture of metatarsus                   |
| 23 | 53423 SR12.00  | Fractures involving multiple regions of one upper limb       |
| 24 | 59175 SB45300  | Posterior tibial artery injury, unspecified                  |
| 25 | 49598 S250B00  | Closed fracture thumb metacarpal neck                        |
| 26 | 90950 SF21500  | Open crush injury, elbow area                                |
| 27 | 52588 S251400  | Open fracture finger metacarpal neck                         |
| 28 |                |                                                              |
| 29 | 7531 S252.00   | Closed fracture sesamoid bone of hand                        |
| 30 | 28338 SD11900  | Abrasion of perineum, infected                               |
| 31 | 26324 S232.00  | Closed fracture of radius and ulna, shaft                    |
| 32 | 38308 S492000  | Closed dislocation lumbar spine                              |
| 33 | 52333 S261T00  | Open fracture finger distal phalanx, shaft                   |
| 34 | 6286 S340.00   | Closed fracture ankle, medial malleolus                      |
| 35 | 38079 TN54.00  | Injury ?accidental, by other firearm                         |
| 36 | 38070 SB40.00  | Common femoral artery injury                                 |
| 37 | 49644 S024z00  | Fracture of malar or maxillary bones, closed, NOS            |
| 38 | 105612 S353E00 | Open fracture metatarsal head                                |
| 39 | 38050 S023.00  | Fracture of mandible, open                                   |
| 40 | 38047 TG80700  | Accidental burning or scalding caused by coffee              |
| 41 | 61529 S261H00  | Open fracture finger proximal phalanx, head                  |
| 42 | 95617 TG80y00  | Accidental burning or scalding caused by other hot vapour    |
| 43 | 59996 S101711  | C7 vertebra open fracture without spinal cord lesion         |
| 44 | 12796 SE23z00  | Contusion, back NOS                                          |
| 45 | 36304 S352H00  | Closed fracture of cuneiforms                                |
| 46 | 12179 S022100  | Closed fracture of mandible, condylar process                |
| 47 | 73940 SB30z00  | Axillary blood vessel injury NOS                             |
| 48 | 59219 S4C3.00  | Open fracture-subluxation of the wrist                       |
| 49 | 44283 SH80z00  | Burn:<10% of body surface NOS                                |
| 50 | 55559 S82vz00  | Other open wound of ear NOS                                  |
| 51 | 61239 S603.00  | Concussion with >24 hrs loss of consc with full recovery     |
| 52 | 494 SE1z.11    | Eye injury                                                   |
| 53 | 18614 S4C..00  | Fracture-dislocation or subluxation of wrist                 |
| 54 | 100181 S490x00 | Closed dislocation of multiple cervical vertebrae            |
| 55 | 3937 S352700   | Closed fracture metatarsal                                   |
| 56 |                |                                                              |
| 57 |                |                                                              |
| 58 |                |                                                              |
| 59 |                |                                                              |
| 60 |                |                                                              |

|    |                |                                                              |
|----|----------------|--------------------------------------------------------------|
| 1  |                |                                                              |
| 2  | 69394 S493.00  | Open dislocation of thoracic and lumbar spine                |
| 3  | 36395 SE07.00  | Contusion, throat                                            |
| 4  | 8537 SD6y.00   | Superficial injury of lower limb NOS, without infection      |
| 5  | 70133 S492.11  | Closed dislocation of thoracic and lumbar vertebra           |
| 6  | 25445 S4D0100  | Closed fracture-dislocation, metacarpophalangeal joint       |
| 7  | 67603 S033.00  | Open fracture of skull NOS with intracranial injury          |
| 8  | 10619 SD30100  | Abrasion, forearm area                                       |
| 9  | 56073 SD3z200  | Superficial injury of wrist NOS, infected                    |
| 10 | 35253 S33x.11  | Lower leg fracture NOS                                       |
| 11 | 25138 S910000  | Open wound of forearm                                        |
| 12 | 37467 N083I00  | Recurrent dislocation of the hip                             |
| 13 | 37460 SD1y700  | Superficial injury of flank NOS, without major open wound    |
| 14 | 17978 SE01.00  | Contusion, cheek                                             |
| 15 | 68243 S836500  | Open wound of mouth floor                                    |
| 16 | 37439 S737.00  | Injury of small intestine                                    |
| 17 | 11658 7K6G.00  | Primary closed reduction of traumatic dislocation of joint   |
| 18 | 54660 S320300  | Closed fracture patella, vertical                            |
| 19 | 73656 SH54000  | Deep full thickness burn of leg unsp, no loss of body part   |
| 20 | 20489 SC06.00  | Late effect of dislocation                                   |
| 21 | 18758 7K6GE00  | Closed reduction of dislocation of toe                       |
| 22 | 73105 S343100  | Open fracture ankle, lateral malleolus, high                 |
| 23 | 94442 TK01400  | Suicide and self inflicted injury by Phenobarbitone          |
| 24 | 22220 SJ34.00  | Brachial plexus injury                                       |
| 25 | 24825 SF10200  | Crush injury, vulva                                          |
| 26 | 104950 SH44.13 | Deep third degree burn of thumb, without loss of a body part |
| 27 | 63242 S14..00  | Fracture of ill-defined bones of trunk                       |
| 28 | 37116 SH70100  | Burn of the gum                                              |
| 29 | 34993 S4J0.00  | Other closed fracture-dislocation                            |
| 30 | 50270 SR1z.00  | Multiple fractures, unspecified                              |
| 31 | 49140 SJ32000  | Lumbar nerve root injury - L1                                |
| 32 | 32400 TG80300  | Accidental burning or scalding caused by steam               |
| 33 | 44548 SD20000  | Abrasion, shoulder area                                      |
| 34 | 70479 S303z00  | Open fracture of proximal femur, pertrochanteric, NOS        |
| 35 | 11804 SK14.11  | Tendon injury to hand NOS                                    |
| 36 | 27657 S001.00  | Closed fracture vault of skull with intracranial injury      |
| 37 | 63800 TN0..00  | Injury ?accidental, poisoning by solid/liquid substances     |
| 38 | 58616 SB4z.00  | Leg blood vessel injury NOS                                  |
| 39 | 59904 S130y00  | Other specified closed fracture acetabulum                   |
| 40 | 94352 SF31z00  | Crush injury, knee and lower leg NOS                         |
| 41 | 29517 SJ64.00  | Cutaneous sensory nerve of lower limb injury                 |
| 42 | 64595 SJ41100  | Coeliac plexus injury                                        |
| 43 | 36599 S300800  | Closed fracture proximal femur, subcapital, Garden grade III |
| 44 | 60633 S023100  | Open fracture of mandible, condylar process                  |
| 45 | 66411 S84x000  | Open wound of neck nape                                      |
| 46 | 73702 SA00z00  | Open wound hip and thigh, NOS                                |
| 47 | 8968 S120A00   | Cough fracture                                               |
| 48 | 31136 SH40200  | Unspecified thickness burn of the thumb                      |
| 49 | 42960 7K6FM00  | Primary open reduction of # dislocation+fixation+screw(s)    |
| 50 | 54766 SH43600  | Full thickness burn of the back of hand                      |
| 51 | 62648 SC3C300  | Seq of crushing injury+traumatic amputation of upper limb    |



|    |                |                                                              |
|----|----------------|--------------------------------------------------------------|
| 1  |                |                                                              |
| 2  | 36440 SH30200  | Unspecified thickness burn of the elbow                      |
| 3  | 34277 7K1Dy00  | Prim open reduction fracture bone & intramedullary fixatn OS |
| 4  | 69974 S100900  | Closed fracture atlas, comminuted                            |
| 5  | 47868 7K6F500  | Primary open reduction of dislocation alone                  |
| 6  | 44830 S330.00  | Closed fracture of tibia and fibula, proximal                |
| 7  |                |                                                              |
| 8  | 4725 S242300   | Multiple fractures of metacarpal bones                       |
| 9  | 2225 S30..00   | Fracture of neck of femur                                    |
| 10 | 42283 S63z.00  | Other cerebral haemorrhage following injury NOS              |
| 11 | 25274 TNz..00  | Injury undetermined accidental or purposely inflicted NOS    |
| 12 |                |                                                              |
| 13 | 39112 S902.11  | Open wound of arm with tendon injury                         |
| 14 | 42876 SH24400  | Deep full thickness burn of back without loss of body part   |
| 15 | 48176 SH53200  | Full thickness burn of the foot                              |
| 16 | 3423 TK...12   | Injury - self-inflicted                                      |
| 17 | 30748 7K1JJ00  | Revision to wire fixation of fracture                        |
| 18 | 36253 SB0..11  | Injury to blood vessel of neck                               |
| 19 | 69705 SJ56300  | Open injury, common digital nerve                            |
| 20 | 24210 S80..11  | Open wound of eyelid                                         |
| 21 |                |                                                              |
| 22 | 36159 SH52600  | Superficial partial thickness burn of the thigh              |
| 23 | 553 S242000    | Fracture of scaphoid                                         |
| 24 |                |                                                              |
| 25 | 16226 63CB.00  | Risk of non-accidental injury                                |
| 26 | 102159 SF22600 | Open crush injury wrist, dorsum                              |
| 27 | 101299 S113000 | Opn spinal fracture with unspec thoracic cord lesion, T1-6   |
| 28 | 15166 S350.12  | Os calcis fracture                                           |
| 29 | 8845 SE3..11   | Arm bruise                                                   |
| 30 |                |                                                              |
| 31 | 39758 S353100  | Open fracture of talus                                       |
| 32 | 4724 S79..00   | Internal injury NOS                                          |
| 33 | 42952 S441.00  | Open traumatic dislocation digit                             |
| 34 | 37456 SH21600  | Superficial burn of the genitalia                            |
| 35 | 61258 SE30200  | Contusion, axillary area                                     |
| 36 |                |                                                              |
| 37 | 21372 SK1FX00  | Injury of unspecified muscle & tendon of ankle and foot      |
| 38 | 35867 S630.12  | Intracranial haematoma following injury                      |
| 39 | 57058 SH32300  | Superficial partial thickness burn of the upper arm          |
| 40 | 34738 S313500  | Open fracture distal femur, lateral condyle                  |
| 41 | 73339 SA4z.00  | Multiple and unspecified open wound of lower limb NOS        |
| 42 | 36308 SJ63000  | Closed injury common peroneal nerve                          |
| 43 | 1022 SK10500   | Other nose injuries                                          |
| 44 | 40689 SA20200  | Open wound foot, dorsum                                      |
| 45 | 30028 S028200  | Fracture of malar and maxillary bones                        |
| 46 | 60108 S211300  | Open fracture scapula, glenoid                               |
| 47 |                |                                                              |
| 48 | 70994 TN1z.00  | Injury ?accidental, poisoning by gas in domestic use NOS     |
| 49 | 34761 SJ60.00  | Sciatic nerve injury                                         |
| 50 | 44343 S02A.00  | Le Fort I fracture maxilla                                   |
| 51 | 28966 7J43000  | Primary open reduc spinal fracture+internal fix+plate        |
| 52 | 44245 S371.00  | Open fracture of lower limb, level unspecified               |
| 53 | 46591 SE11.12  | Bruise of periocular tissue                                  |
| 54 | 28226 SJ53100  | Closed injury, radial nerve, sensory branch                  |
| 55 | 70146 SB45200  | Anterior tibial vein injury                                  |
| 56 |                |                                                              |
| 57 | 63895 S821000  | Open wound of external ear with complication, unspecified    |
| 58 | 40368 S370.00  | Closed fracture of lower limb, level unspecified             |
| 59 |                |                                                              |
| 60 | 54602 SF22500  | Closed crush injury hand, palm                               |

|    |                |                                                             |
|----|----------------|-------------------------------------------------------------|
| 1  |                |                                                             |
| 2  | 35265 S440200  | Closed traumatic interphalangeal dislocation                |
| 3  | 33566 SJ5z.00  | Shoulder girdle or upper limb peripheral nerve injury NOS   |
| 4  | 73703 S4H2200  | Closed fracture-subluxation, tarsometatarsal joint          |
| 5  | 94435 S211z00  | Open fracture of scapula NOS                                |
| 6  |                |                                                             |
| 7  | 35233 SD80011  | Abrasion or friction burn of eyelid                         |
| 8  | 34980 N082.11  | Spontaneous joint dislocation                               |
| 9  | 1742 S234200   | Closed fracture of the distal radius, unspecified           |
| 10 | 35133 SP04X00  | Dislocation of joint prosthesis                             |
| 11 | 73802 SH52700  | Deep partial thickness burn of the leg, unspecified         |
| 12 |                |                                                             |
| 13 | 17138 7J17700  | Traction for fracture of jaw                                |
| 14 | 68992 7K1H400  | Secondary open reduct fracture bone & external fixation HFQ |
| 15 | 55433 SD1y.00  | Superficial injury trunk NOS, without major wound/infection |
| 16 | 70610 S833000  | Open wound of nose with complication, unspecified           |
| 17 | 35031 S232300  | Closed fracture radius and ulna, middle                     |
| 18 |                |                                                             |
| 19 | 44786 S331400  | Open fracture proximal tibia, lateral condyle (plateau)     |
| 20 | 53677 S224900  | Closed fracture distal humerus, bicondylar (T-Y fracture)   |
| 21 | 64685 SJ20900  | Central cervical cord injury, without bony injury, C5-7     |
| 22 | 44323 SJ55.00  | Cutaneous sensory nerve injury of upper limb                |
| 23 | 34970 S912200  | Open wound of wrist with tendon involvement                 |
| 24 |                |                                                             |
| 25 | 102245 SK17700 | Popliteus injury of knee                                    |
| 26 | 70484 S77v200  | Prostate injury without mention of open wound into cavity   |
| 27 | 34907 S210200  | Closed fracture scapula, coracoid                           |
| 28 | 36784 SH52900  | Deep partial thickness burn of the foot                     |
| 29 | 28926 7J12100  | Open reduction of fracture of mandible NEC                  |
| 30 |                |                                                             |
| 31 | 23471 S410000  | Closed traumatic dislocation shoulder joint, unspecified    |
| 32 | 53481 SH34200  | Deep full thickness burn of elbow without loss of body part |
| 33 | 34827 TN83.00  | Injury ?accidental, by extremes of cold                     |
| 34 | 34826 S835200  | Open wound of forehead with complication                    |
| 35 | 70313 S77w200  | Prostate injury with open wound into cavity                 |
| 36 |                |                                                             |
| 37 | 61936 S430111  | Radioulnar dislocation - distal                             |
| 38 | 63992 SJ1y000  | Olfactory (1st) nerve injury                                |
| 39 | 25907 SK15400  | Finger injury                                               |
| 40 | 63542 S901200  | Open wound of axillary region with complication             |
| 41 | 34730 S235700  | Open Smith's fracture                                       |
| 42 |                |                                                             |
| 43 | 97292 SH94.00  | Deep full thickness burn, without loss of body part, NOS    |
| 44 | 18389 S234000  | Closed fracture of forearm, lower end, unspecified          |
| 45 | 34708 S134100  | Closed fracture pelvis, ischium                             |
| 46 | 28731 S4F1.00  | Open fracture-dislocation, knee joint                       |
| 47 | 40579 TG80400  | Accidental burning/scalding by boiling water from kettle    |
| 48 |                |                                                             |
| 49 | 55814 S241A00  | Open fracture scaphoid, proximal pole                       |
| 50 | 34453 SE24000  | Contusion, perineum                                         |
| 51 | 34426 S230500  | Closed fracture of the proximal ulna                        |
| 52 | 26304 SB12.00  | Subclavian artery injury                                    |
| 53 | 70590 S23y000  | Open fracture of forearm, unspecified                       |
| 54 |                |                                                             |
| 55 | 3038 S834300   | Open wound of eyebrow                                       |
| 56 | 8410 S231B00   | Open fracture olecranon, intra-articular                    |
| 57 | 34396 7K1G100  | Prmy open reduction of fracture and external fixation       |
| 58 | 102735 S110700 | Cls spinal fracture with complete cervcl cord lesion, C5-7  |
| 59 |                |                                                             |
| 60 | 6213 S23C.00   | Fracture of lower end of both ulna and radius               |
|    | 56750 SH12.11  | Blister of face, head and neck, second degree burn          |



|    |                |                                                              |
|----|----------------|--------------------------------------------------------------|
| 1  |                |                                                              |
| 2  | 28846 S81..00  | Open wound of eyeball                                        |
| 3  | 12770 S61..00  | Cerebral laceration and contusion                            |
| 4  | 32771 8BC7.00  | Glueing of wound                                             |
| 5  | 16659 SC16.00  | Late effect of burn of wrist and hand                        |
| 6  | 56746 SH23500  | Full thickness burn of the buttock                           |
| 7  |                |                                                              |
| 8  | 105532 S802.11 | Laceration of lacrimal passage                               |
| 9  | 5345 S4A..00   | Fracture-dislocation or subluxation shoulder                 |
| 10 | 108187 TK53.00 | Suicide and selfinflicted injury by military firearms        |
| 11 | 24620 S352B00  | Closed fracture metatarsal base                              |
| 12 | 34302 S4G0.00  | Closed fracture-dislocation, ankle joint                     |
| 13 | 28913 S022400  | Closed fracture of mandible, ramus, unspecified              |
| 14 | 61426 TN8..00  | Injury ?accidental, by other means                           |
| 15 | 70083 SB21100  | Hepatic vein injury                                          |
| 16 | 61254 SH13.00  | Full thickness burn of the face, head or neck                |
| 17 | 63588 S235E00  | Open fracture distal radius, intra-articular other type      |
| 18 | 59959 S001z00  | Closed #skull vlt with intracranial injury+concussion unspec |
| 19 | 73430 S000z00  | Closed #skull vlt no intracranial injury + concussion unspec |
| 20 | 34172 S225.00  | Open fracture of the distal humerus                          |
| 21 | 25765 S44z.00  | Dislocation of finger or thumb not otherwise specified       |
| 22 | 40268 S234800  | Closed Galeazzi fracture                                     |
| 23 | 34151 S334000  | Closed fracture distal tibia, extra-articular                |
| 24 | 34121 S421.00  | Open traumatic dislocation elbow joint                       |
| 25 | 42963 SD50200  | Abrasion, finger, multiple                                   |
| 26 | 72611 S882200  | Degloving injury scrotum                                     |
| 27 | 47783 SH21400  | Superficial burn of the back (excluding buttock)             |
| 28 | 38590 S4J1.00  | Other open fracture-dislocation                              |
| 29 | 59729 SJ67X00  | Injury of unspecified nerve of ankle and foot                |
| 30 | 73437 SH85400  | Burn: 50-59% of body surface, 40-49% BS full thickness       |
| 31 | 6839 S339000   | Closed fracture of distal fibula                             |
| 32 | 37851 TG80600  | Accidental burning or scalding caused by tea                 |
| 33 | 32660 SJ35.00  | Lumbosacral plexus injury                                    |
| 34 | 7489 SD6y400   | Superficial injury of ankle NOS                              |
| 35 | 25669 SE30300  | Contusion, upper arm                                         |
| 36 | 41824 SH41400  | Superficial burn of the thumb and finger(s)                  |
| 37 | 43792 S24z.00  | Fracture of carpal bone NOS                                  |
| 38 | 53688 S221000  | Open fracture of proximal humerus, unspecified part          |
| 39 | 60778 S420y00  | Other closed traumatic dislocation of elbow                  |
| 40 | 8633 SF1..00   | Crush injury, trunk                                          |
| 41 | 20253 S352000  | Closed fracture of tarsal bone, unspecified                  |
| 42 | 33933 S230000  | Closed fracture of proximal forearm, unspecified part        |
| 43 | 50227 S321000  | Open fracture patella, transverse                            |
| 44 | 17097 TN...00  | Injury undetermined whether accidentally/purposely inflicted |
| 45 | 43301 S490111  | Closed dislocation of atlanto-axial joint                    |
| 46 | 33905 S250200  | Closed fracture finger metacarpal base                       |
| 47 | 52406 S220500  | Closed fracture of humerus, upper epiphysis                  |
| 48 | 38620 SJ67200  | Injury of cutaneous sensory nerve at ankle and foot level    |
| 49 | 103416 S261C00 | Open fracture thumb distal phalanx, mallet                   |
| 50 | 31073 S411411  | Open dislocation of acromioclavicular joint                  |
| 51 | 33866 S261M00  | Open fracture finger middle phalanx, shaft                   |
| 52 | 65890 SH24300  | Deep full thickness burn of abdom.wall, no loss of body part |
| 53 |                |                                                              |
| 54 |                |                                                              |
| 55 |                |                                                              |
| 56 |                |                                                              |
| 57 |                |                                                              |
| 58 |                |                                                              |
| 59 |                |                                                              |
| 60 |                |                                                              |

|    |                |                                                              |
|----|----------------|--------------------------------------------------------------|
| 1  |                |                                                              |
| 2  | 99562 SB40000  | Closed injury, common femoral artery                         |
| 3  | 108654 TN3y.00 | Injury ?accidental, other means of hang/strangle/suffocate   |
| 4  | 20445 7206400  | Open reduction of fracture of orbit and internal fixation    |
| 5  | 49796 S235500  | Open fracture distal ulna - other                            |
| 6  | 28198 S333z00  | Open fracture of tibia and fibula, shaft, NOS                |
| 7  | 6106 7K1L800   | Closed reduction of fracture of ankle                        |
| 8  | 67916 S490700  | Closed dislocation C6/C7                                     |
| 9  | 47675 S781211  | Bile duct injury with open wound into cavity                 |
| 10 | 34503 Q203600  | Other dislocation or subluxation due to birth trauma         |
| 11 | 64880 7K6G800  | Closed reduction of dislocation of upper limb                |
| 12 | 37314 S49y.00  | Other open multiple and ill-defined dislocation              |
| 13 | 63095 SJ21600  | Unspecified thoracic cord injury, without bony injury, T7-12 |
| 14 | 4047 7K6Gz00   | Primary closed reduction of traumatic joint dislocation NOS  |
| 15 | 37696 SJ5X.00  | Injury of unspecified nerve at wrist and hand level          |
| 16 | 38445 S605.00  | Concussion with loss of consciousness of unspec duration     |
| 17 | 41451 SC15.00  | Late effect of burn of eye, head and neck                    |
| 18 | 58825 SF20800  | Closed crush injury, clavicular area                         |
| 19 | 93029 S331011  | Open fracture of tibial condyles                             |
| 20 | 105467 SH22A00 | Deep partial thickness burn of the abdominal wall            |
| 21 | 35886 S821100  | Open wound of ear auricle with complication                  |
| 22 | 33678 S260400  | Closed fracture thumb proximal phalanx, base                 |
| 23 | 61517 SH12000  | Superficial part. thickness burn unspecified part face/head  |
| 24 | 7162 SD2y000   | Superficial injury shoulder NOS                              |
| 25 | 45695 S231.00  | Open fracture of proximal radius and ulna                    |
| 26 | 51770 SF22400  | Closed crush injury hand, dorsum                             |
| 27 | 94076 S613.00  | Cortex laceration with open intracranial wound               |
| 28 | 50642 S94z.00  | Multiple and unspecified open wound of upper limb NOS        |
| 29 | 33623 SJ13.11  | Sixth cranial nerve injury                                   |
| 30 | 50573 S4A1100  | Open fracture-dislocation acromio-clavicular joint           |
| 31 | 10133 SD00.00  | Abrasion or friction burn of head, without infection         |
| 32 | 27605 S294.00  | Fractures involving multiple regions of both upper limbs     |
| 33 | 45646 SJ58.00  | Supraclavicular nerve injury                                 |
| 34 | 33457 S331100  | Open fracture proximal fibula                                |
| 35 | 17107 S29..12  | Multiple rib fractures                                       |
| 36 | 33540 S224z00  | Closed fracture of distal humerus, not otherwise specified   |
| 37 | 971 S33x000    | Closed fracture of tibia, unspecified part, NOS              |
| 38 | 105278 S235211 | Dupuytren's fracture, radius - open                          |
| 39 | 44456 SE3z.00  | Contusion, upper limb NOS                                    |
| 40 | 45183 S420z00  | Closed traumatic dislocation of elbow NOS                    |
| 41 | 33496 S410z00  | Closed traumatic dislocation of shoulder NOS                 |
| 42 | 90278 SH33200  | Full thickness burn of the elbow                             |
| 43 | 60672 SH53500  | Full thickness burn of the knee                              |
| 44 | 8812 SD0y100   | Superficial injury of neck NOS                               |
| 45 | 33459 S027.00  | Open orbital blow-out fracture                               |
| 46 | 12068 SE32.00  | Contusion wrist or hand                                      |
| 47 | 108238 S73x000 | Other GIT injury without open wound into cavity, unspecified |
| 48 | 25698 SH61.00  | Superficial burn of multiple specified sites                 |
| 49 | 14677 SH50600  | Unspecified thickness burn of the thigh                      |
| 50 | 62221 S492100  | Closed dislocation thoracic spine                            |
| 51 | 33404 S236.00  | Fracture of upper end of ulna                                |

|    |                |                                                               |
|----|----------------|---------------------------------------------------------------|
| 1  |                |                                                               |
| 2  | 33393 S320.00  | Closed fracture of the patella                                |
| 3  | 33368 S64z.00  | Intracranial injury NOS                                       |
| 4  | 31963 S850.00  | Open wound of chest wall, uncomplicated                       |
| 5  | 48665 SH05.00  | Burn resulting in eyeball rupture and destruction of eyeball  |
| 6  | 72266 SJ30100  | Cervical nerve root injury - C2                               |
| 7  |                |                                                               |
| 8  | 69702 7K1K700  | Primary functional bracing of fracture                        |
| 9  | 33745 SH43100  | Full thickness burn of a single finger                        |
| 10 | 50826 SJ6x000  | Closed injury obturator nerve                                 |
| 11 | 31959 SB22300  | Splenic artery injury                                         |
| 12 |                |                                                               |
| 13 | 62334 S261F00  | Open fracture finger proximal phalanx, shaft                  |
| 14 | 4306 S360.00   | Closed fracture of one or more phalanges of foot              |
| 15 | 102015 S733000 | Small intestine injury with open wound into cavity, unspec    |
| 16 | 32744 SK1C000  | Injury of flexor muscle and tendon of thumb at forearm level  |
| 17 | 29895 SE41z00  | Contusion, knee and lower leg NOS                             |
| 18 |                |                                                               |
| 19 | 65484 S120600  | Closed fracture of six ribs                                   |
| 20 | 32646 S225800  | Open fracture distal humerus, capitellum                      |
| 21 | 32638 S125200  | Closed fracture of thyroid cartilage                          |
| 22 | 32541 S900300  | Open wound of upper arm                                       |
| 23 |                |                                                               |
| 24 | 32476 S736.00  | Injury of stomach                                             |
| 25 | 42969 S344000  | Closed fracture ankle, bimalleolar, low fibular fracture      |
| 26 | 53651 S750.00  | Closed injury of spleen                                       |
| 27 | 17350 SK1F.00  | Injury of muscle and tendon at ankle and foot level           |
| 28 | 32276 SD4..00  | Superficial injury of hand, excluding fingers                 |
| 29 |                |                                                               |
| 30 | 33413 SH43.00  | Full thickness burn of the wrist and hand                     |
| 31 | 38387 SH03.00  | Acid chemical burn of cornea and conjunctival sac             |
| 32 | 24253 SH93.11  | Third degree burn                                             |
| 33 | 22347 SD11.00  | Abrasion or friction burn of trunk, infected                  |
| 34 | 30617 S73..11  | GIT - gastrointestinal tract injury                           |
| 35 | 31153 S02y100  | Fracture of orbit NOS, open                                   |
| 36 |                |                                                               |
| 37 | 39697 SD3zz00  | Superficial injury of lower arm, infected NOS                 |
| 38 | 31664 N082100  | Pathological dislocation of the shoulder region               |
| 39 | 5035 SK1B.00   | Injury of muscle + tendon of abdomen, lower back and pelvis   |
| 40 | 63065 SH44.11  | Deep third degree burn of finger, without loss of a body part |
| 41 |                |                                                               |
| 42 | 73236 SH70z00  | Burn of the mouth or pharynx NOS                              |
| 43 | 64633 S497300  | Open traumatic dislocation, sterno-clavicular joint, ant      |
| 44 | 91919 7K1G600  | Primary open reduction of fracture and skin traction          |
| 45 | 17822 S230200  | Closed fracture of ulna, coronoid                             |
| 46 | 91592 SD0z200  | Superficial injury of scalp NOS, infected                     |
| 47 |                |                                                               |
| 48 | 73428 SH53x00  | Full thickness burn of multiple sites of the leg              |
| 49 | 49906 SH20100  | Unspecified thickness burn of the breast                      |
| 50 | 61812 S201.00  | Open fracture of clavicle                                     |
| 51 | 10621 SD60200  | Abrasion, knee                                                |
| 52 | 31760 S225100  | Open fracture distal humerus, supracondylar                   |
| 53 |                |                                                               |
| 54 | 72768 SH13000  | Full thickness burn of unspecified part of the face or head   |
| 55 | 31745 SD50000  | Abrasion, finger                                              |
| 56 | 22346 SF3..11  | Crush injury of leg                                           |
| 57 | 990 SD...00    | Superficial injury                                            |
| 58 | 58190 S12X000  | Closed fracture of bony thorax part unspecified               |
| 59 | 31545 S112700  | Cls spinal fracture with complete thorac cord lesion, T7-12   |
| 60 | 12224 SA...00  | Open wound of lower limb                                      |

|    |                |                                                              |
|----|----------------|--------------------------------------------------------------|
| 1  |                |                                                              |
| 2  | 31525 S250000  | Closed fracture of metacarpal bone (s), site unspecified     |
| 3  | 89232 SH12600  | Superficial partial thickness burn of the scalp              |
| 4  | 31427 S900.00  | Open wound of shoulder/upper limb without complication       |
| 5  | 51179 SJ31400  | Thoracic nerve root injury - T5                              |
| 6  | 12288 SD31000  | Abrasion of elbow, infected                                  |
| 7  | 55077 7K1LC00  | Closed reduction of fracture of lower limb                   |
| 8  | 10570 S30y.11  | Hip fracture NOS                                             |
| 9  |                |                                                              |
| 10 | 108596 S4H1100 | Open fracture-dislocation, midtarsal joint                   |
| 11 | 4350 7J13400   | Reduction of Le Fort 1 fracture of maxilla                   |
| 12 | 27984 SJ52400  | Open injury, ulnar nerve                                     |
| 13 | 37496 S835100  | Open wound of cheek with complication                        |
| 14 | 30990 S832300  | Open wound of nasal sinus                                    |
| 15 | 30976 TD07.00  | Accident due to fall from burning private dwelling           |
| 16 | 60580 S4A2000  | Closed fracture-subluxation shoulder joint                   |
| 17 | 24929 SD70.11  | Abrasion or friction burn of heel, without infection         |
| 18 |                |                                                              |
| 19 | 106501 S497500 | Open traumatic dislocation laryngeal cartilage               |
| 20 | 29959 7K6GJ00  | Closed reduction of dislocation of nasal bone                |
| 21 | 6994 7J12.00   | Reduction of fracture of mandible                            |
| 22 | 30659 S227.00  | Fracture of shaft of humerus                                 |
| 23 | 30159 SJ32400  | Lumbar nerve root injury - L5                                |
| 24 | 56804 S894000  | Open wound of hypochondrium                                  |
| 25 | 11872 7K1LV00  | Primary closed reduction of fracture alone                   |
| 26 | 6062 S356.00   | Fracture of metatarsal bone                                  |
| 27 | 30611 S352111  | Closed fracture of astragalus                                |
| 28 | 55195 S11z.00  | Fracture of spine with spinal cord lesion NOS                |
| 29 | 72600 S106100  | Closed vertical fracture of sacrum                           |
| 30 | 30424 SR...00  | Injury involving multiple body regions                       |
| 31 | 93559 SJ31200  | Thoracic nerve root injury - T3                              |
| 32 | 93901 SH55200  | Deep full thickness burn of foot, with loss of body part     |
| 33 | 17606 S240700  | Closed fracture capitae                                      |
| 34 | 54797 S490100  | Closed dislocation atlanto-occipital joint                   |
| 35 | 53923 S27z.00  | Multiple fractures of hand bones NOS                         |
| 36 | 30324 SH42300  | Superficial partial thickness burn of more than one finger   |
| 37 | 44142 S225000  | Open fracture of elbow, unspecified part                     |
| 38 | 43448 S135400  | Open fracture pelvis, anterior superior iliac spine          |
| 39 | 94607 SJ20200  | Anterior cervical cord injury, without bony injury, C1-4     |
| 40 | 30213 7K1L300  | Remanipulation of fracture of bone NEC                       |
| 41 | 44924 S235200  | Open fracture of the distal radius, unspecified              |
| 42 | 30203 S028.00  | Fracture of skull and facial bones                           |
| 43 | 30629 TH...00  | Late effects due to accidental injury                        |
| 44 | 68300 SH12811  | Cheek - 2nd degree burn                                      |
| 45 | 30133 S440500  | Closed traumatic dislocation, interphalangeal joint,thumb    |
| 46 | 36139 SF22z00  | Crush injury, wrist and hand NOS                             |
| 47 | 35874 S480600  | Closed traumatic dislocation toe, IPJ, single                |
| 48 | 12405 SD01.00  | Abrasion or friction burn of head, infected                  |
| 49 | 51999 S301900  | Open fracture proximal femur,subcapital, Garden grade IV     |
| 50 | 8891 S3...00   | Fracture of lower limb                                       |
| 51 | 30058 S10..11  | Fracture of transverse process spine - no spinal cord lesion |
| 52 | 11639 S134z00  | Other or multiple closed fracture of pelvis NOS              |
| 53 | 29985 SD61300  | Abrasion of lower leg, infected                              |
| 54 |                |                                                              |
| 55 |                |                                                              |
| 56 |                |                                                              |
| 57 |                |                                                              |
| 58 |                |                                                              |
| 59 |                |                                                              |
| 60 |                |                                                              |

|    |                |                                                              |
|----|----------------|--------------------------------------------------------------|
| 1  |                |                                                              |
| 2  | 50433 SH22200  | Superficial partial thickness burn of the chest wall         |
| 3  | 27421 N083611  | Knee - recurrent dislocation                                 |
| 4  | 48837 S261S00  | Open fracture finger distal phalanx, base                    |
| 5  | 64871 N082N00  | Neuromuscular dislocation of the hip                         |
| 6  | 25519 S250300  | Closed fracture finger metacarpal shaft                      |
| 7  |                |                                                              |
| 8  | 89101 7206800  | Internal fixation of fracture of orbit                       |
| 9  | 35905 7K6F000  | Primry opn redctn of # dislocation of jt + skeletal traction |
| 10 | 93851 S001300  | Closed #skull vlt + intracranial injury, 1-24hr loss consc   |
| 11 | 36464 S222.00  | Closed fracture of humerus, shaft or unspecified part        |
| 12 |                |                                                              |
| 13 | 105702 S100B00 | Closed fracture axis, spondylolysis                          |
| 14 | 29796 S400.00  | Closed dislocation of jaw                                    |
| 15 | 4884 SH20400   | Unspecified thickness burn of the back (excluding buttock)   |
| 16 | 29089 S104400  | Closed fracture lumbar vertebra, transverse process          |
| 17 | 12069 SE30.00  | Contusion, shoulder or upper arm                             |
| 18 |                |                                                              |
| 19 | 61521 SJ6..00  | Pelvic girdle and lower limb peripheral nerve injury         |
| 20 | 69729 S261J00  | Open fracture finger proximal phalanx, multiple              |
| 21 | 33520 S332200  | Closed fracture of tibia and fibula, shaft                   |
| 22 | 31032 7L0H000  | Open reduction of congenital dislocation of knee             |
| 23 | 33978 SA33.00  | Degloving injury toe(s)                                      |
| 24 |                |                                                              |
| 25 | 62286 SJ21.00  | Thoracic cord injury without spinal bone injury              |
| 26 | 105348 SH44400 | Deep full thickness burn of thumb+fing, no loss of body part |
| 27 | 2206 SH50000   | Unspecified degree burn of the leg, unspecified              |
| 28 | 32432 TG8y.00  | Accidental burning caused by other hot substance or object   |
| 29 | 38028 S210000  | Closed fracture of scapula, unspecified part                 |
| 30 | 29309 S7...11  | Blast injury to internal organs                              |
| 31 |                |                                                              |
| 32 | 7265 SH91.00   | Superficial burn NOS                                         |
| 33 | 43891 TN4..00  | Injury ?accidental, drowning                                 |
| 34 | 24516 S260D00  | Closed fracture finger proximal phalanx                      |
| 35 | 62810 7K6F700  | Primary open reduction of dislocation+cast immobilisation    |
| 36 | 29152 S231100  | Open fracture olecranon, extra-articular                     |
| 37 | 29928 SB30.00  | Axillary blood vessel injury                                 |
| 38 |                |                                                              |
| 39 | 40535 S260z00  | Closed fracture of one or more phalanges of hand NOS         |
| 40 | 29134 TN5..00  | Injury ?accidental, by firearms and explosives               |
| 41 | 30429 7K1F.00  | Primary open reduction of intraarticular fracture of bone    |
| 42 | 92349 S4D3500  | Open fracture-subluxation, interphalangeal joint thumb       |
| 43 | 29121 S332.00  | Closed fracture of tibia/fibula, shaft                       |
| 44 |                |                                                              |
| 45 | 32826 S912100  | Open wound of elbow with tendon involvement                  |
| 46 | 29111 S251.00  | Open fracture of metacarpal bone(s)                          |
| 47 |                |                                                              |
| 48 | 23690 SJ8..00  | Injury of nerves and spinal cord at neck level               |
| 49 | 23803 S301800  | Open fracture proximal femur,subcapital, Garden grade III    |
| 50 | 72274 S82w.00  | Other open wound of ear with complication                    |
| 51 | 31933 7J41.00  | Decompression of fracture of spine                           |
| 52 | 29723 N082611  | Knee pathological dislocation                                |
| 53 | 72598 SD1zD00  | Superficial injury of vagina NOS, infected                   |
| 54 | 60619 SH52D00  | Deep partial thickness burn of the thigh                     |
| 55 | 92309 S895400  | Open wound of flank with complication                        |
| 56 |                |                                                              |
| 57 | 28965 S304.00  | Petrochanteric fracture                                      |
| 58 | 22900 SJ40.00  | Cervical sympathetic nerve injury                            |
| 59 | 22800 SJ5B.00  | Anterior interosseous nerve injury                           |
| 60 | 59828 SD2y200  | Superficial injury of axilla NOS                             |



|    |                |                                                              |
|----|----------------|--------------------------------------------------------------|
| 1  |                |                                                              |
| 2  | 103528 S493100 | Open dislocation thoracic spine                              |
| 3  | 66697 SH32600  | Superficial partial thickness burn of scapular region        |
| 4  | 28807 S62..12  | Subarachnoid haemorrhage following injury                    |
| 5  | 1539 S9...00   | Open wound of upper limb                                     |
| 6  | 53951 S330011  | Closed fracture of tibial condyles                           |
| 7  | 63618 S490800  | Closed dislocation C7/T1                                     |
| 8  | 52389 S234111  | Smith's fracture - closed                                    |
| 9  | 48754 SC44200  | Seq/burn+corros classfbl only accord extent/body surf involv |
| 10 | 71030 SC00.11  | Late effect of face fracture                                 |
| 11 | 34058 S260000  | Closed fracture of phalanx or phalanges, unspecified         |
| 12 | 62314 TN04.00  | Injury ?accidental, poisoning by other spec drug/medicament  |
| 13 | 28702 S132z00  | Closed fracture pubis NOS                                    |
| 14 | 28691 F4K3300  | Posterior dislocation of lens                                |
| 15 | 98460 SB24000  | Renal blood vessel injury, unspecified                       |
| 16 | 5659 SH30500   | Unspecified thickness burn of the shoulder                   |
| 17 | 61378 S222z00  | Closed fracture of humerus, shaft or unspecified part NOS    |
| 18 | 65746 S833100  | Open wound of nasal septum with complication                 |
| 19 | 32178 7K14y00  | Other specified open surgical fracture of bone               |
| 20 | 28603 S90..00  | Open wound of shoulder region and upper limb                 |
| 21 | 46673 SK1D100  | Injury of multiple muscles and tendons at hip + thigh level  |
| 22 | 3983 S122.00   | Closed fracture sternum                                      |
| 23 | 96082 SH22400  | Superficial partial thickness burn of back (excl buttock)    |
| 24 | 12516 S2B..00  | Fracture of bone of hand                                     |
| 25 | 68516 SB35100  | Open injury, digital artery                                  |
| 26 | 58996 SJ2z.00  | Spinal cord injury without spinal bone injury NOS            |
| 27 | 52339 S76z.00  | Injury to kidney NOS                                         |
| 28 | 44032 SK1A.00  | Injury of muscle and tendon at thorax level                  |
| 29 | 48325 S61..11  | Cerebellar laceration and contusion                          |
| 30 | 104820 S61xz00 | Brain cont no open intracranial wound + concussion unspec    |
| 31 | 4088 SC20.00   | Late effect of intracranial injury without skull fracture    |
| 32 | 28416 S60z.00  | Concussion NOS                                               |
| 33 | 18033 SK14000  | Unspecified injury of hand                                   |
| 34 | 37107 SH21500  | Superficial burn of the buttock                              |
| 35 | 24318 S79z.00  | Internal injury NOS                                          |
| 36 | 27950 SF10.00  | Crush injury, external genitalia                             |
| 37 | 67571 SF30500  | Open crush injury, hip                                       |
| 38 | 8646 S314.00   | Fracture of shaft of femur                                   |
| 39 | 53905 S360300  | Closed fracture multiple phalanges, toe                      |
| 40 | 4847 TG80000   | Accidental burning/scalding caused by boiling water, unspec  |
| 41 | 67973 S100G00  | Closed fracture cervical vertebra, burst                     |
| 42 | 11770 S102y00  | Other specified closed fracture thoracic vertebra            |
| 43 | 6825 S23..00   | Fracture of radius and ulna                                  |
| 44 | 59955 SD60z00  | Abrasion/friction burn of lower limb, without infection NOS  |
| 45 | 41902 SH22300  | Superficial partial thickness burn of the abdominal wall     |
| 46 | 22416 SP04a00  | Dislocation of hip joint prosthesis                          |
| 47 | 28280 SE33z00  | Contusion, finger NOS                                        |
| 48 | 61113 TK72.00  | Suicide+selfinflicted injury-jump from natural sites         |
| 49 | 33669 SA3z.00  | Open wound of toe(s) NOS                                     |
| 50 | 4846 SH2..00   | Burn of the trunk                                            |
| 51 | 7565 SE40100   | Contusion, thigh                                             |

|    |                |                                                              |
|----|----------------|--------------------------------------------------------------|
| 1  |                |                                                              |
| 2  | 7129 SH92.00   | Partial thickness burn NOS                                   |
| 3  | 33357 7K15z00  | Other surgical fracture of bone NOS                          |
| 4  | 27388 S74..00  | Injury to liver                                              |
| 5  | 33882 S2A..00  | Fracture of upper limb, level unspecified                    |
| 6  | 7997 S410111   | Anterior dislocation of shoulder                             |
| 7  |                |                                                              |
| 8  | 28214 SP22100  | Injury to nerve during surgery                               |
| 9  | 101574 S101000 | Open fracture of unspecified cervical vertebra               |
| 10 | 5130 SE4..11   | Leg bruise                                                   |
| 11 | 41856 SE24200  | Contusion, scrotum or testis                                 |
| 12 |                |                                                              |
| 13 | 63524 SJ41500  | Injury of thoracic sympathetic nerves                        |
| 14 | 62354 Q203300  | Fracture of tibia or fibula due to birth trauma              |
| 15 | 14746 S3xz.00  | Other, multiple and ill-defined fractures of lower limb NOS  |
| 16 | 40327 7K6FB00  | Primary open reduction of dislocation and external fixation  |
| 17 | 678 SA10100    | Open wound of leg                                            |
| 18 | 68963 TN6..00  | Injury ?accidental, by cutting and stabbing instruments      |
| 19 | 1775 S93z.00   | Open wound of finger(s) NOS                                  |
| 20 |                |                                                              |
| 21 | 104800 SJ63300 | Open injury common peroneal nerve                            |
| 22 | 99027 S331800  | Open fracture fibula, head                                   |
| 23 | 28115 TK51.00  | Suicide and selfinflicted injury by shotgun                  |
| 24 | 44712 S240D00  | Closed fracture scaphoid, waist, comminuted                  |
| 25 | 28095 SD10400  | Abrasion, back                                               |
| 26 |                |                                                              |
| 27 | 28081 7K1Hy00  | Other specified secondary open reduction of fracture of bone |
| 28 | 70752 SH62100  | Deep partial thickness burn of multiple specified sites      |
| 29 | 27575 S100500  | Closed fracture of fifth cervical vertebra                   |
| 30 | 13557 TK30.00  | Suicide and selfinflicted injury by hanging                  |
| 31 | 78444 S33A.00  | Fracture of tibia                                            |
| 32 | 42440 S81z.00  | Open wound of eyeball NOS                                    |
| 33 | 27590 S235.00  | Open fracture of radius and ulna, lower end                  |
| 34 | 39921 S430.00  | Closed traumatic dislocation of wrist                        |
| 35 | 34378 S720.00  | Closed injury of diaphragm                                   |
| 36 |                |                                                              |
| 37 | 69706 SH81z00  | Burn: 10-19% of body surface NOS                             |
| 38 | 70953 SJ63500  | Open injury deep peroneal nerve (anterior tibial)            |
| 39 | 29804 S360100  | Closed fracture middle phalanx, toe                          |
| 40 | 67990 SB40100  | Open injury, common femoral artery                           |
| 41 | 27881 S250600  | Closed fracture finger metacarpal                            |
| 42 | 65895 S4H3300  | Open fracture-subluxation, metatarsophalangeal joint, single |
| 43 | 27818 S12z.12  | Sternum fracture NOS                                         |
| 44 | 69664 S832200  | Open wound of nasal cavity                                   |
| 45 | 69646 SD6z000  | Superficial injury of hip NOS, infected                      |
| 46 | 62489 7J43.11  | Internal fixation of fracture of spine                       |
| 47 | 27820 SH12400  | Superficial partial thickness burn of the chin               |
| 48 | 33857 S494100  | Closed dislocation of coccyx                                 |
| 49 | 65614 7K6FN00  | Primary open reduction of # dislocation+fixation+plate(s)    |
| 50 | 25560 SEz..00  | Contusion with skin intact, NOS                              |
| 51 | 8056 S242.00   | Fracture at wrist and hand level                             |
| 52 | 6893 S224100   | Closed fracture distal humerus, supracondylar                |
| 53 | 10694 S496200  | Closed traumatic dislocation sterno-clavicular joint         |
| 54 | 60765 S251800  | Open fracture of thumb metacarpal                            |
| 55 | 10250 S4D..00  | Fracture-dislocation/subluxation finger/thumb                |
| 56 | 38431 S40z.00  | Dislocation of jaw NOS                                       |
| 57 |                |                                                              |
| 58 |                |                                                              |
| 59 |                |                                                              |
| 60 |                |                                                              |



|    |                |                                                              |
|----|----------------|--------------------------------------------------------------|
| 1  |                |                                                              |
| 2  | 2102 SA10000   | Open wound of knee                                           |
| 3  | 27643 S260S00  | Closed fracture finger distal phalanx, base                  |
| 4  | 27636 S920.00  | Open wound of hand without mention of complication           |
| 5  | 32192 SA02.00  | Open wound of hip and thigh with tendon involvement          |
| 6  | 90494 S120700  | Closed fracture of seven ribs                                |
| 7  |                |                                                              |
| 8  | 254 S463.00    | Closed traumatic dislocation of patello-femoral joint        |
| 9  | 455 S3z0000    | Greenstick fracture                                          |
| 10 | 33598 S260L00  | Closed fracture finger middle phalanx, base                  |
| 11 | 50566 TG81500  | Accidental burning caused by hydrofluoric acid               |
| 12 | 92383 SF0X.00  | Crushing injury of head, part unspecified                    |
| 13 |                |                                                              |
| 14 | 4029 S210300   | Closed fracture scapula, glenoid                             |
| 15 | 51566 SH42.12  | Second degree burn of finger                                 |
| 16 | 28800 S4H0400  | Closed fracture-dislocation, IPJ, single toe                 |
| 17 | 59630 SC1z.00  | Late effect of skin and subcutaneous tissue injury NOS       |
| 18 | 72313 SB1y100  | Intercostal vein injury                                      |
| 19 |                |                                                              |
| 20 | 15376 S224.00  | Closed fracture of the distal humerus                        |
| 21 | 48289 SH11400  | Superficial burn of the chin                                 |
| 22 | 50659 SH22z00  | Partial thickness burn of the trunk NOS                      |
| 23 | 40992 S353200  | Open fracture navicular                                      |
| 24 |                |                                                              |
| 25 | 110097 SB1y400 | Azygos vein injury                                           |
| 26 | 33644 7K6GM00  | Closed reduction of dislocation of joint & internal fixation |
| 27 | 28142 SE45.00  | Contusion, lower limb NOS                                    |
| 28 | 27470 TK61.00  | Suicide and selfinflicted injury by stabbing                 |
| 29 | 993 S242200    | Fracture of other metacarpal bone                            |
| 30 |                |                                                              |
| 31 | 28621 7J03z00  | Reduction of fracture of facial bone NOS                     |
| 32 | 28244 S120z00  | Closed fracture of rib(s) NOS                                |
| 33 | 105819 S347100 | Open fracture ankle, trimalleolar, high fibular fracture     |
| 34 | 30286 TN3..00  | Injury ?accidental, hanging, strangulation and suffocation   |
| 35 | 9107 SH11600   | Superficial burn of the scalp                                |
| 36 |                |                                                              |
| 37 | 110554 S761000 | Kidney injury with open wound into cavity, unspecified       |
| 38 | 61999 S420300  | Closed traumatic dislocation elbow joint, medial             |
| 39 | 40358 S223100  | Open fracture of humerus, shaft                              |
| 40 | 98594 TKx3.00  | Suicide and selfinflicted injury by extremes of cold         |
| 41 | 26408 S02xz00  | Fracture of other facial bones, closed, NOS                  |
| 42 |                |                                                              |
| 43 | 59985 S241C00  | Open fracture scaphoid, waist, oblique                       |
| 44 | 26231 SJ3..11  | Spinal plexus injury                                         |
| 45 | 68709 S450200  | Closed traumatic obturator dislocation of hip                |
| 46 | 108556 SyuBC00 | [X]Dislocation, sprain and strain of unspecif body region    |
| 47 | 26130 7K1LD00  | Closed reduction of fracture of nasal bone                   |
| 48 |                |                                                              |
| 49 | 45844 L336.11  | Bruising of cord                                             |
| 50 | 47875 S411.00  | Open traumatic dislocation of shoulder                       |
| 51 | 26087 S463000  | Closed traumatic dislocation patello-femoral joint, lateral  |
| 52 | 68981 S02C.00  | Le Fort III fracture maxilla                                 |
| 53 |                |                                                              |
| 54 | 102084 S010400 | Closed #skull bse no intracranial injury, >24hr LOC+recovery |
| 55 | 68217 SJ64000  | Closed injury cutaneous sensory nerve, leg                   |
| 56 | 22443 SH0x.00  | Burn of eyelid NOS                                           |
| 57 | 36391 S300400  | Closed fracture head of femur                                |
| 58 | 46545 S62z.00  | Cerebral haemorrhage following injury NOS                    |
| 59 | 51930 SH43.12  | Third degree burn of hand                                    |
| 60 | 25817 S932.00  | Open wound of finger or thumb with tendon involvement        |

|    |                |                                                              |
|----|----------------|--------------------------------------------------------------|
| 1  |                |                                                              |
| 2  | 35837 S240600  | Closed fracture trapezoid                                    |
| 3  | 65848 S4D1000  | Open fracture-dislocation digit, unspecified                 |
| 4  | 40476 S234500  | Closed fracture distal ulna, unspecified                     |
| 5  | 99079 S735300  | Descending colon injury with open wound into cavity          |
| 6  | 24011 SJ65.00  | Injury of multiple nerves at hip and thigh level             |
| 7  |                |                                                              |
| 8  | 25538 S910.00  | Open wound of lower arm without mention of complication      |
| 9  | 57923 S130300  | Closed fracture acetabulum, posterior column                 |
| 10 | 61820 S431.00  | Open traumatic dislocation of the wrist                      |
| 11 | 33503 S100611  | C6 vertebra closed fracture without spinal cord lesion       |
| 12 |                |                                                              |
| 13 | 10696 S127000  | Multiple fractures of ribs                                   |
| 14 | 18031 SD01200  | Abrasion of scalp, infected                                  |
| 15 | 66469 S741300  | Liver moderate laceration with open wound into cavity        |
| 16 | 70108 S835z00  | Open wound of face with complication, NOS                    |
| 17 | 36318 SE30100  | Contusion, scapular area                                     |
| 18 |                |                                                              |
| 19 | 19915 SD00z00  | Abrasion head NOS                                            |
| 20 | 35640 SF20000  | Crush injury, shoulder region                                |
| 21 | 35289 S43z.00  | Dislocation of wrist NOS                                     |
| 22 | 8346 SF...00   | Crushing injury                                              |
| 23 | 66334 SH12900  | Superficial partial thickness burn of the neck               |
| 24 | 10357 S240200  | Closed fracture lunate                                       |
| 25 | 11066 S234900  | Closed volar Barton's fracture                               |
| 26 | 3127 S82..00   | Open wound of ear                                            |
| 27 |                |                                                              |
| 28 | 26045 S240500  | Closed fracture trapezium                                    |
| 29 | 41921 SD9z.00  | Other superficial injury, infected, NOS                      |
| 30 | 66241 SJ60000  | Closed injury sciatic nerve                                  |
| 31 | 61732 7K6GF11  | Closed reduction of dislocation of leg                       |
| 32 | 9342 SJ0..00   | Optic nerve and pathway injury                               |
| 33 |                |                                                              |
| 34 | 17993 SH50400  | Unspecified thickness burn of the lower leg                  |
| 35 | 40537 S420000  | Closed traumatic dislocation of elbow, unspecified           |
| 36 | 66109 TK01000  | Suicide and self inflicted injury by Amylobarbitone          |
| 37 | 48125 S441200  | Open traumatic interphalangeal dislocation                   |
| 38 | 45394 7K1F300  | Primary intraarticular fixation intraartic fracture bone NEC |
| 39 | 307 SK17100    | Other leg injury                                             |
| 40 | 2442 S355.00   | Fracture of talus                                            |
| 41 |                |                                                              |
| 42 | 15184 S00..00  | Fracture of vault of skull                                   |
| 43 | 44298 SE3y.00  | Contusion, upper limb, multiple sites                        |
| 44 | 43378 S351.00  | Open fracture of calcaneus                                   |
| 45 | 42692 S61z.00  | Cerebral laceration and contusion NOS                        |
| 46 | 65812 S491.00  | Open dislocation cervical spine                              |
| 47 |                |                                                              |
| 48 | 51710 S480A00  | Closed traumatic dislocation, subtalar joint                 |
| 49 | 101993 7K6Gc00 | Primary closed reduction of # dislocation+external fixation  |
| 50 | 30616 N331000  | Pathological fracture of thoracic vertebra                   |
| 51 | 12186 S4z..00  | Dislocation or subluxation not otherwise specified           |
| 52 | 66513 SH44100  | Deep full thickness burn of a finger, no loss of body part   |
| 53 | 21950 TG8y000  | Accid burning caused by heat from electric heating appliance |
| 54 | 32218 SH41100  | Superficial burn of a single finger                          |
| 55 | 9459 SE3..00   | Contusion, upper limb                                        |
| 56 |                |                                                              |
| 57 | 94406 7K6GT00  | Primary closed reduction of dislocation+skeletal traction    |
| 58 | 65710 SH12500  | Superficial partial thickness burn of the nose               |
| 59 |                |                                                              |
| 60 | 17673 S930000  | Open wound, finger                                           |

|    |               |                                                              |
|----|---------------|--------------------------------------------------------------|
| 1  |               |                                                              |
| 2  | 45562 S312400 | Closed fracture distal femur, medial condyle                 |
| 3  | 3675 S10B100  | Fracture of sacrum                                           |
| 4  | 65636 S234912 | Closed volar Barton fracture-subluxation                     |
| 5  | 34315 SH0z.00 | Burn confined to eye and adnexa NOS                          |
| 6  | 65606 7J41y00 | Other specified decompression of fracture of spine           |
| 7  | 65600 SB32.00 | Radial blood vessel injury                                   |
| 8  | 72711 S110600 | Cls spinal fracture with unspec cervical cord lesion, C5-7   |
| 9  | 37523 S490.11 | Closed dislocation of cervical vertebra                      |
| 10 | 44047 SCz..00 | Late effect injury/poison/toxin effect/external cause NOS    |
| 11 | 45141 S302100 | Closed fracture proximal femur, intertrochanteric, two part  |
| 12 | 30418 S235800 | Open Galeazzi fracture                                       |
| 13 | 34197 S120400 | Closed fracture of four ribs                                 |
| 14 | 65455 S450300 | Closed traumatic dislocation hip joint, anterior             |
| 15 | 65448 TK6z.00 | Suicide and selfinflicted injury by cutting and stabbing NOS |
| 16 | 52194 S300300 | Closed fracture proximal femur, basicervical                 |
| 17 | 69586 S497100 | Open traumatic dislocation of pelvis                         |
| 18 | 52614 S231200 | Open fracture of ulna, coronoid                              |
| 19 | 65301 S23yz00 | Open fracture of radius and ulna, NOS                        |
| 20 | 1486 S410400  | Closed traumatic dislocation acromio-clavicular joint        |
| 21 | 44839 S470.00 | Closed traumatic dislocation ankle joint                     |
| 22 | 65285 SF31500 | Open crush injury, knee                                      |
| 23 | 45011 S4J1100 | Open fracture-dislocation of pelvis                          |
| 24 | 57088 SB22500 | Superior mesenteric artery trunk injury                      |
| 25 | 11262 S235300 | Open fracture of ulna, styloid process                       |
| 26 | 97514 S71z.00 | Heart and lung injury NOS                                    |
| 27 | 40361 S251600 | Open fracture finger metacarpal                              |
| 28 | 93650 S4H3.00 | Open fracture-subluxation, foot                              |
| 29 | 89688 S030z00 | Closed #skull NOS no intracranial inj + concussion unspec    |
| 30 | 31542 SD61000 | Abrasion of hip, infected                                    |
| 31 | 94385 S77v100 | Ovary injury without mention of open wound into cavity       |
| 32 | 33792 SE32z00 | Contusion, wrist and hand NOS                                |
| 33 | 73411 S042.00 | Mult #skull/face + other bones, open, no intracranial injury |
| 34 | 65011 PE41300 | Congenital dislocation of patella                            |
| 35 | 4572 S33x200  | Closed fracture of tibia and fibula, unspecified part        |
| 36 | 54821 S492.00 | Closed dislocation of thoracic and lumbar spine              |
| 37 | 7256 SD5..00  | Superficial of injury finger(s)                              |
| 38 | 69919 S300100 | Closed fracture proximal femur, transepiphyseal              |
| 39 | 53279 S312000 | Closed fracture of distal femur, unspecified                 |
| 40 | 62787 S33yz00 | Open fracture of tibia and fibula, unspecified part, NOS     |
| 41 | 43589 SJ67100 | Injury of medial plantar nerve                               |
| 42 | 44711 S200100 | Closed fracture clavicle, medial end                         |
| 43 | 99994 7K1K900 | Other primary external immobilisation of fracture            |
| 44 | 64744 TKx5.00 | Suicide and selfinflicted injury by crashing motor vehicle   |
| 45 | 96346 SJ81.00 | Crush injury of phrenic nerve                                |
| 46 | 64725 S241700 | Open fracture capitata                                       |
| 47 | 18840 S330300 | Closed fracture proximal tibia, medial condyle (plateau)     |
| 48 | 48636 S025.00 | Fracture of malar or maxillary bones, open                   |
| 49 | 64575 S241D00 | Open fracture scaphoid, waist, comminuted                    |
| 50 | 36332 S210600 | Closed fracture scapula, neck                                |
| 51 | 95675 S750300 | Spleen parenchyma laceration without open wound into cavity  |

|    |                |                                                            |
|----|----------------|------------------------------------------------------------|
| 1  |                |                                                            |
| 2  | 53698 S235D00  | Open fracture distal radius, extra-articular other type    |
| 3  | 50154 SH10600  | Unspecified thickness burn of the scalp                    |
| 4  | 64444 SH0..14  | Periocular burns                                           |
| 5  | 1922 SH40000   | Unspecified thickness burn of the hand, unspecified        |
| 6  | 94981 S497200  | Open traumatic dislocation sterno-clavicular joint         |
| 7  | 64714 SF10z00  | Crush injury, external genitalia NOS                       |
| 8  | 97803 S353D00  | Open fracture metatarsal neck                              |
| 9  | 50990 SH33400  | Full thickness burn of the axilla                          |
| 10 | 28251 S360200  | Closed fracture distal phalanx, toe                        |
| 11 | 25113 SA20100  | Open wound foot, plantar                                   |
| 12 | 63186 SB42.00  | Femoral vein injury                                        |
| 13 | 109936 S481z00 | Open traumatic dislocation of foot not otherwise specified |
| 14 | 41299 SJ5y000  | Injury of cutaneous sensory nerve at forearm level         |
| 15 | 64297 S100L00  | Closed fracture cervical vertebra, transverse process      |
| 16 | 33824 SH50500  | Unspecified thickness burn of the knee                     |
| 17 | 41930 S100z00  | Closed fracture of cervical spine not otherwise specified  |
| 18 | 60397 SJ51400  | Open injury, median nerve, palmar sensory branch           |
| 19 | 58787 SJ0z.00  | Optic nerve or pathway injury NOS                          |
| 20 | 45881 SJ15.13  | Eighth cranial nerve injury                                |
| 21 | 52470 S134700  | Closed vertical fracture of ilium                          |
| 22 | 8590 SA2..00   | Open wound of foot, excluding toe(s)                       |
| 23 | 72724 S942.00  | Multiple/unspec open wound upper limb with tendon involved |
| 24 | 98158 7K6GY00  | Primary closed reduction of # dislocation+cast immobil     |
| 25 | 41914 SH41500  | Superficial burn of the palm of hand                       |
| 26 | 55655 SB3X.00  | Injury of unspecified blood vessel at forearm level        |
| 27 | 33720 S224000  | Closed fracture of elbow, unspecified part                 |
| 28 | 22542 S441400  | Open traumatic dislocation, proximal interphalangeal joint |
| 29 | 64026 SA32.11  | Open wound of toe(s) with tendon injury                    |
| 30 | 94817 S740300  | Liver moderate laceration without open wound into cavity   |
| 31 | 24886 S932400  | Mallet finger with open tendon injury                      |
| 32 | 42805 S313300  | Open fracture distal femur, supracondylar                  |
| 33 | 71866 S041z00  | Closed #skull/face,mult + intracran inj, concussion unspec |
| 34 | 85491 S4B3.00  | Open fracture-subluxation elbow                            |
| 35 | 985 S440000    | Closed traumatic dislocation of finger, unspecified        |
| 36 | 63948 S231900  | Open fracture of the proximal radius                       |
| 37 | 44721 S220000  | Closed fracture of proximal humerus, unspecified part      |
| 38 | 1852 SH20300   | Unspecified thickness burn of the abdominal wall           |
| 39 | 51308 S641.00  | Intracranial injury NOS + open intracranial wound          |
| 40 | 62461 SJ64200  | Closed injury lateral cutaneous nerve thigh                |
| 41 | 60542 S712000  | Lung injury without open wound into thorax, unspecified    |
| 42 | 92886 SJ24000  | Closed injury cauda equina                                 |
| 43 | 63736 SF20700  | Closed crush injury, upper arm                             |
| 44 | 24598 S250500  | Closed fracture finger metacarpal head                     |
| 45 | 59154 SH52C00  | Deep partial thickness burn of the knee                    |
| 46 | 37469 SH60.00  | Unspecified thickness burn of multiple specified sites     |
| 47 | 57247 S781400  | Retroperitoneum injury with open wound into cavity         |
| 48 | 56332 S713200  | Lung laceration with open wound into thorax                |
| 49 | 30377 Z6G1900  | Fracture - traction                                        |
| 50 | 43606 SE31z00  | Contusion, elbow and forearm NOS                           |
| 51 | 53750 SA03.00  | Degloving injury, hip or thigh                             |
| 52 |                |                                                            |
| 53 |                |                                                            |
| 54 |                |                                                            |
| 55 |                |                                                            |
| 56 |                |                                                            |
| 57 |                |                                                            |
| 58 |                |                                                            |
| 59 |                |                                                            |
| 60 |                |                                                            |

|    |                |                                                             |
|----|----------------|-------------------------------------------------------------|
| 1  |                |                                                             |
| 2  | 28425 S240E00  | Closed fracture scaphoid, tuberosity                        |
| 3  | 63424 S460.11  | Bucket handle tear - current injury                         |
| 4  | 51991 SH41.15  | First degree burn of wrist                                  |
| 5  | 12275 SH40.11  | Unspecified degree burn of finger                           |
| 6  | 483 S20..00    | Fracture of clavicle                                        |
| 7  | 7910 SF23.11   | Crush injury of thumb                                       |
| 8  | 19387 S302011  | Closed fracture of femur, greater trochanter                |
| 9  | 49567 S114000  | Closed spinal fracture with unspecified lumbar cord lesion  |
| 10 | 32210 SH41600  | Superficial burn of the back of hand                        |
| 11 | 40330 S220600  | Closed fracture proximal humerus, three part                |
| 12 | 70191 S850000  | Degloving injury chest wall                                 |
| 13 | 17370 7K6G700  | Closed reduction of dislocation of thumb                    |
| 14 | 27626 S94..00  | Multiple and unspecified open wound of upper limb           |
| 15 | 1700 S352.11   | March fracture                                              |
| 16 | 43638 SK1z.00  | Other injury NOS                                            |
| 17 | 235 S32..00    | Fracture of patella                                         |
| 18 | 169 S35..11    | Metatarsal bone fracture                                    |
| 19 | 34773 S900000  | Open wound of shoulder region                               |
| 20 | 25716 SD1yD00  | Superficial injury of vagina NOS, without major open wound  |
| 21 | 24671 S101500  | Open fracture of fifth cervical vertebra                    |
| 22 | 63958 SF02200  | Crush injury, pharynx                                       |
| 23 | 59147 SF20100  | Crush injury, scapular region                               |
| 24 | 100278 S451200 | Open traumatic obturator dislocation of hip                 |
| 25 | 17455 S02z.11  | Jaw fracture NOS                                            |
| 26 | 6074 S235100   | Open Colles' fracture                                       |
| 27 | 60254 7J12000  | Reduction of fracture of alveolus of mandible               |
| 28 | 92356 7J42z00  | Other reduction of fracture of spine NOS                    |
| 29 | 96689 SH32A00  | Deep partial thickness burn of the upper arm                |
| 30 | 62852 S820z00  | Open wound of external ear not otherwise specified          |
| 31 | 34424 S36z.00  | Fracture of one or more phalanges of foot NOS               |
| 32 | 61093 SC3z.00  | Late effect of injury NOS                                   |
| 33 | 72908 7K15y00  | Other specified other surgical fracture of bone             |
| 34 | 99382 SH87500  | Burn: 70-79% of body surface, 50-59% BS full thickness      |
| 35 | 7831 S120000   | Closed fracture of rib, unspecified                         |
| 36 | 39807 SF4z.00  | Crush injury, unspecified site                              |
| 37 | 38489 S300.00  | Closed fracture proximal femur, transcervical               |
| 38 | 7339 7K1LA00   | Closed reduction of fracture of toe                         |
| 39 | 102965 S4A1000 | Open fracture-dislocation shoulder joint                    |
| 40 | 17958 S001000  | Closed #skull vlt + intracranial injury, unspec state consc |
| 41 | 107788 SJ20600 | Unspecified cervical cord injury, without bony injury, C5-7 |
| 42 | 93981 N331N11  | Minimal trauma fracture                                     |
| 43 | 62697 S902200  | Open wound of axillary region with tendon involvement       |
| 44 | 72071 S4H2000  | Closed fracture-subluxation, subtalar joint                 |
| 45 | 10009 S346.00  | Closed fracture ankle, trimalleolar                         |
| 46 | 41799 SD30z00  | Abrasion/friction burn of lower arm, without infection NOS  |
| 47 | 40596 SH52200  | Superficial partial thickness burn of the foot              |
| 48 | 22254 SJ30300  | Cervical nerve root injury - C4                             |
| 49 | 100254 S775.00 | Open injury of uterus                                       |
| 50 | 62631 S4J2000  | Closed fracture-subluxation of sternum                      |
| 51 | 96688 SH54.00  | Deep full thickness burn of leg without loss of body part   |



|    |                |                                                             |
|----|----------------|-------------------------------------------------------------|
| 1  |                |                                                             |
| 2  | 40818 S481400  | Open traumatic metatarsal dislocation, unspecified          |
| 3  | 16282 S834500  | Open wound of jaw                                           |
| 4  | 35276 SH10500  | Unspecified thickness burn of the nose                      |
| 5  | 40367 S224300  | Closed fracture distal humerus, medial condyle              |
| 6  | 60823 SB25500  | Uterine artery injury                                       |
| 7  | 69637 SD1z500  | Superficial injury of buttock NOS, infected                 |
| 8  | 35849 S112.00  | Closed fracture of thoracic spine with spinal cord lesion   |
| 9  | 108618 SH42B00 | Deep partial thickness burn of more than one finger         |
| 10 | 99062 SH42.15  | Second degree burn of wrist                                 |
| 11 | 47839 S225z00  | Open fracture of distal humerus, not otherwise specified    |
| 12 | 50115 SH42E00  | Deep partial thickness burn of back of hand                 |
| 13 | 33411 SH80.00  | Burn involving <10% of body surface (BS)                    |
| 14 | 17514 SH51300  | Superficial burn of the ankle                               |
| 15 | 62162 S711.00  | Heart injury, open                                          |
| 16 | 44505 SC0z.00  | Late effect of musculoskeletal/connective tissue injury NOS |
| 17 | 62683 SB47300  | Injury of multiple blood vessels at lower leg level         |
| 18 | 62065 S490400  | Closed dislocation C3/C4                                    |
| 19 | 845 S35..00    | Fracture of one or more tarsal and metatarsal bones         |
| 20 | 9606 SE11.13   | Eyelid injury                                               |
| 21 | 62029 7K1Hz00  | Secondary open reduction of fracture of bone NOS            |
| 22 | 2603 S3...11   | Leg fracture                                                |
| 23 | 43132 S7...00  | Internal injury of chest, abdomen and pelvis                |
| 24 | 34873 S100511  | C5 vertebra closed fracture without spinal cord lesion      |
| 25 | 43667 TG80A00  | Accidental burning/scalding caused by soup, stew or curries |
| 26 | 99514 S401.00  | Open dislocation of jaw                                     |
| 27 | 61982 S923000  | Degloving injury hand, palmar                               |
| 28 | 2250 S344.12   | Pott's fracture - ankle                                     |
| 29 | 20195 S00z.00  | Fracture of vault of skull NOS                              |
| 30 | 33704 S4A0000  | Closed fracture-dislocation shoulder joint                  |
| 31 | 61757 S01..17  | Posterior fossa fracture                                    |
| 32 | 33967 S100211  | C2 vertebra closed fracture without spinal cord lesion      |
| 33 | 8314 S646000   | Minor head injury                                           |
| 34 | 61802 S312z00  | Closed fracture of distal femur not otherwise specified     |
| 35 | 6235 SF33.00   | Crush injury, toe(s)                                        |
| 36 | 15085 7K1Lz00  | Other closed reduction of fracture of bone NOS              |
| 37 | 100309 S821.00 | Open wound of external ear with complication                |
| 38 | 99568 SA42.00  | Multiple and unspec open wound leg with tendon involvement  |
| 39 | 9103 S02..00   | Fracture of face bones                                      |
| 40 | 105727 SJ6x300 | Open injury pudendal nerve                                  |
| 41 | 62747 N083E00  | Recurrent dislocation of shoulder - inferior                |
| 42 | 8573 S00..12   | Parietal bone fracture                                      |
| 43 | 325 S34..00    | Fracture of ankle                                           |
| 44 | 60828 S4A3100  | Open fracture-subluxation acromio-clavicular joint          |
| 45 | 54271 S901.00  | Open wound of shoulder and upper limb with complication     |
| 46 | 61569 TK70.00  | Suicide+selfinflicted injury-jump from residential premises |
| 47 | 61551 SH12100  | Superficial partial thickness burn of the ear               |
| 48 | 199 S23B.00    | Fracture of lower end of radius                             |
| 49 | 36268 S022z00  | Fracture of mandible, closed, NOS                           |
| 50 | 42978 S330z00  | Closed fracture of tibia and fibula, proximal NOS           |
| 51 | 65753 SJ31700  | Thoracic nerve root injury - T8                             |

|    |                |                                                              |
|----|----------------|--------------------------------------------------------------|
| 1  |                |                                                              |
| 2  | 16232 S496000  | Closed traumatic dislocation of sternum                      |
| 3  | 67696 S895.00  | Open wound of lateral abdominal wall with complication       |
| 4  | 5507 SH20000   | Unspecified thickness burn of unspecified part of the trunk  |
| 5  | 95585 S104600  | Closed fracture lumbar vertebra, tricolunar                  |
| 6  | 12823 7K1J300  | Closed reduction fracture small bone & fixation using screw  |
| 7  | 8896 SD7y200   | Contusion of toe(s) with damage to nail                      |
| 8  | 54855 S125300  | Closed fracture of trachea                                   |
| 9  | 45482 N083N00  | Recurrent dislocation of elbow                               |
| 10 | 61357 S003600  | Open #skull vlt + intracranial injury, LOC unspec duration   |
| 11 | 4465 7J03200   | Reduction of fracture of zygomatic bones                     |
| 12 | 42144 S73x500  | Appendix injury without mention of open wound into cavity    |
| 13 | 94031 S261400  | Open fracture thumb proximal phalanx, base                   |
| 14 | 37865 S361.00  | Open fracture of one or more phalanges of foot               |
| 15 | 64545 S353C00  | Open fracture metatarsal shaft                               |
| 16 | 62975 S430800  | Closed traumatic dislocation other carpal joint              |
| 17 | 49526 S320000  | Closed fracture patella, transverse                          |
| 18 | 61237 SH25.00  | Deep full thickness burn of trunk, with loss of body part    |
| 19 | 61181 S260C00  | Closed fracture thumb distal phalanx, mallet                 |
| 20 | 44543 SF2y.00  | Crush injury, arm, multiple sites                            |
| 21 | 60137 S920200  | Multiple open wounds of wrist and hand                       |
| 22 | 41996 S480z00  | Closed traumatic dislocation of foot not otherwise specified |
| 23 | 28203 SHz..00  | Burns NOS                                                    |
| 24 | 60885 S301600  | Open fracture proximal femur,subcapital, Garden grade I      |
| 25 | 6311 SD5y.00   | Superficial injury of finger NOS, without infection          |
| 26 | 69213 S241800  | Open fracture hamate                                         |
| 27 | 97299 S833z00  | Open wound of nose with complication, NOS                    |
| 28 | 73322 SH12200  | Superficial partial thickness burn of the eye                |
| 29 | 24807 SD2..00  | Superficial injury of shoulder and upper arm                 |
| 30 | 97430 TN80000  | Injury ?accidental, by jumping before moving object          |
| 31 | 27687 SJ56100  | Closed injury, digital nerve in finger                       |
| 32 | 29119 S02x.00  | Closed fracture other facial bone                            |
| 33 | 61733 S303.00  | Open fracture of proximal femur, pertrochanteric             |
| 34 | 5302 S132.00   | Closed fracture pubis                                        |
| 35 | 60640 SH20x00  | Unspecified thickness burn of multiple sites of the trunk    |
| 36 | 10470 SK17500  | Injury of lower leg                                          |
| 37 | 29406 S89v.00  | Other and unspecified open wound of trunk                    |
| 38 | 7135 S342000   | Closed fracture ankle, lateral malleolus, low                |
| 39 | 48238 TN55.00  | Injury ?accidental, by explosive                             |
| 40 | 45835 SH81.00  | Burn involving 10-19% of body surface (BS)                   |
| 41 | 33684 S261D00  | Open fracture finger proximal phalanx                        |
| 42 | 107128 SB44500 | Open injury, popliteal artery                                |
| 43 | 23764 7K6GC00  | Closed reduction of dislocation of ankle                     |
| 44 | 108242 S353600 | Open fracture lateral cuneiform                              |
| 45 | 30230 SJ52000  | Closed injury, ulnar nerve                                   |
| 46 | 44628 S4H0.00  | Closed fracture-dislocation foot                             |
| 47 | 10622 S221.11  | Shoulder fracture - open                                     |
| 48 | 8263 S350.11   | Heel bone fracture                                           |
| 49 | 60512 SH50x00  | Unspecified thickness burn of multiple sites of the leg      |
| 50 | 42710 SF40.00  | Crush injury, multiple sites NEC                             |
| 51 | 50133 S913.00  | Degloving injury lower arm                                   |



|    |                |                                                              |
|----|----------------|--------------------------------------------------------------|
| 1  |                |                                                              |
| 2  | 60463 SH21.00  | Superficial burn of the trunk                                |
| 3  | 42959 S410200  | Closed traumatic dislocation shoulder joint, posterior       |
| 4  | 60419 S82y.00  | Open wound of ear with complication, NOS                     |
| 5  | 54154 SH53400  | Full thickness burn of the lower leg                         |
| 6  | 45216 F4F1500  | Dislocation of lacrimal gland                                |
| 7  | 64370 SH83z00  | Burn: 30-39% of body surface NOS                             |
| 8  |                |                                                              |
| 9  | 109839 SJ22000 | Unspecified lumbar cord injury without bony injury           |
| 10 | 11378 S12z.11  | Rib fracture NOS                                             |
| 11 | 22289 SD71.11  | Abrasion or friction burn of heel, infected                  |
| 12 | 49710 S734500  | Rectum injury without mention of open wound into cavity      |
| 13 | 67239 S353J00  | Open fracture of base of fifth metatarsal                    |
| 14 | 9590 S923.00   | Degloving injury hand                                        |
| 15 | 72263 SB23500  | Gastric vein injury                                          |
| 16 | 6067 SF21100   | Crush injury, elbow                                          |
| 17 | 57328 S03z.00  | Skull fracture NOS                                           |
| 18 | 23721 S7...13  | Internal injury of chest                                     |
| 19 |                |                                                              |
| 20 | 102033 S741z00 | Liver injury with open wound into cavity, NOS                |
| 21 | 24311 SB32200  | Injury of radial artery at wrist and hand level              |
| 22 | 51985 SJ30400  | Cervical nerve root injury - C5                              |
| 23 | 25209 SB4y.00  | Other leg blood vessel injury                                |
| 24 | 73613 S121000  | Open fracture of rib, unspecified                            |
| 25 | 68676 S630.11  | Cerebral compression due to injury                           |
| 26 | 70049 TN08.00  | Injury ?accidental, poisoning by arsenic or its compounds    |
| 27 | 65007 SH12800  | Superficial partial thickness burn of the cheek              |
| 28 | 50461 SF3y.00  | Crush injury, lower limb, multiple sites                     |
| 29 | 28538 S127100  | Cough fracture of ribs                                       |
| 30 | 17352 SC3C100  | Sequelae of dislocation, sprain and strain of upper limb     |
| 31 | 73922 SB45000  | Tibial blood vessel injury, unspecified                      |
| 32 | 10033 S234F00  | Closed Barton's fracture                                     |
| 33 | 29636 SH30000  | Unspecified thickness burn of the arm, unspecified           |
| 34 | 33870 S21z.00  | Fracture of scapula NOS                                      |
| 35 | 69209 S611.00  | Open cerebral contusion                                      |
| 36 | 9900 SF32011   | Crush injury of heel                                         |
| 37 | 59798 S01..11  | Anterior fossa fracture                                      |
| 38 | 49183 SB03.00  | Injury of multiple blood vessels at neck level               |
| 39 |                |                                                              |
| 40 | 101056 TK5z.00 | Suicide and selfinflicted injury by firearms/explosives NOS  |
| 41 | 68100 SJ34100  | Closed injury, brachial plexus, lower roots                  |
| 42 | 4210 SD90.00   | Abrasion or friction burn, without infection, NOS            |
| 43 | 43153 S352z00  | Closed fracture of one or more tarsal + metatarsal bones NOS |
| 44 | 59504 S933500  | Ring avulsion injury, class 4                                |
| 45 | 45275 S221z00  | Open fracture of proximal humerus not otherwise specified    |
| 46 | 46522 SH42.13  | Second degree burn of hand                                   |
| 47 | 69551 SP04A00  | Fracture of bone autograft                                   |
| 48 | 39067 SH10900  | Unspecified thickness burn of the neck                       |
| 49 | 64229 S4A1.00  | Open fracture-dislocation shoulder                           |
| 50 | 34284 SE06.00  | Bruise of mandibular joint area                              |
| 51 | 50103 S832100  | Open wound of nasal septum                                   |
| 52 | 59302 SJ57.00  | Suprascapular nerve injury                                   |
| 53 | 59291 S523E00  | Volar plate injury, thumb, interphalangeal joint             |
| 54 | 64365 SH41x00  | First degree burn of multiple sites of the wrist or hand     |
| 55 |                |                                                              |
| 56 |                |                                                              |
| 57 |                |                                                              |
| 58 |                |                                                              |
| 59 |                |                                                              |
| 60 |                |                                                              |

|    |                |                                                              |
|----|----------------|--------------------------------------------------------------|
| 1  |                |                                                              |
| 2  | 21680 SJ53.00  | Radial nerve injury                                          |
| 3  | 55012 SH13900  | Full thickness burn of the neck                              |
| 4  | 59216 SH12711  | Forehead - 2nd degree burn                                   |
| 5  | 106522 SF22700 | Open crush injury wrist, volar                               |
| 6  | 68387 S871.00  | Open wound of buttock with complication                      |
| 7  | 10246 S231300  | Open Monteggia's fracture                                    |
| 8  | 47856 SH31.00  | Superficial burn of the arm                                  |
| 9  | 73150 S251200  | Open fracture finger metacarpal base                         |
| 10 | 63298 SJ01.00  | Optic chiasm injury                                          |
| 11 | 2710 S35..12   | Tarsal bone fracture                                         |
| 12 | 42798 S465z00  | Closed traumatic dislocation of knee not otherwise specified |
| 13 | 29911 S4F..00  | Fracture-dislocation or subluxation knee                     |
| 14 | 36448 S024.11  | Fracture of upper jaw, closed                                |
| 15 | 96514 S110800  | Cls spinal fracture with anterior cervcl cord lesion, C5-7   |
| 16 | 63085 7K1G500  | Primary open reduction of fracture and functional bracing    |
| 17 | 63788 SD3z.00  | Superficial injury of lower arm NOS, infected                |
| 18 | 68660 S023400  | Open fracture of mandible, ramus, unspecified                |
| 19 | 5354 S240400   | Closed fracture pisiform                                     |
| 20 | 41001 S490.12  | Closed dislocation of neck                                   |
| 21 | 58822 SH41z00  | Superficial burn of the wrist or hand NOS                    |
| 22 | 8053 SD...11   | Abrasions                                                    |
| 23 | 65946 7G2C700  | Escharotomy of burnt skin of head                            |
| 24 | 103914 SC20100 | Sequelae of injury to brain                                  |
| 25 | 27699 S260E00  | Closed fracture finger proximal phalanx, base                |
| 26 | 45669 SJ5..12  | Shoulder girdle peripheral nerve injury                      |
| 27 | 58718 SJ6..12  | Pelvic girdle peripheral nerve injury                        |
| 28 | 36893 7K1LW00  | Primary closed reduction of fracture and skin traction       |
| 29 | 58699 S932700  | Mallet thumb with open tendon injury                         |
| 30 | 51151 SF20.00  | Crush injury, shoulder and upper arm                         |
| 31 | 58642 S30x.00  | Open fracture of unspecified proximal femur                  |
| 32 | 58640 7K6GF00  | Closed reduction of dislocation of lower limb                |
| 33 | 37609 S01..16  | Orbital roof fracture                                        |
| 34 | 25284 S1z..00  | Fracture of neck and trunk NOS                               |
| 35 | 29126 SE23113  | Contusion of pelvic region                                   |
| 36 | 58732 SH42400  | Superficial partial thickness burn of thumb and finger(s)    |
| 37 | 53357 SH92000  | Superficial partial thickness burn NOS                       |
| 38 | 18485 SJ7..00  | Injury to other nerves                                       |
| 39 | 58031 SD2z.00  | Superficial injury of shoulder and upper arm NOS, infected   |
| 40 | 64027 S260600  | Closed fracture thumb proximal phalanx, neck                 |
| 41 | 58025 S84z.00  | Open wound of neck NOS                                       |
| 42 | 58019 SH43.11  | Third degree burn of finger                                  |
| 43 | 24276 S30w.00  | Closed fracture of unspecified proximal femur                |
| 44 | 39893 S4H1300  | Open fracture-dislocation, metatarsophalangeal joint, single |
| 45 | 71113 S780211  | Bile duct injury without open wound into cavity              |
| 46 | 51144 S860.00  | Open wound of back, uncomplicated                            |
| 47 | 70462 S734400  | Sigmoid colon injury without open wound into cavity          |
| 48 | 73611 S112z00  | Closed fracture of thoracic spine with cord lesion NOS       |
| 49 | 24621 S23x200  | Closed fracture of ulna (alone), unspecified                 |
| 50 | 102718 S013z00 | Open #skull bse + intracranial injury + concussion unspec    |
| 51 | 54727 S85X.00  | Open wound of thorax, part unspecified                       |

|    |                |                                                              |
|----|----------------|--------------------------------------------------------------|
| 1  |                |                                                              |
| 2  | 67484 SB42100  | Open injury, femoral vein                                    |
| 3  | 57644 S030.00  | Closed fracture of skull NOS without intracranial injury     |
| 4  | 69728 S361100  | Open fracture middle phalanx, toe                            |
| 5  | 40795 S713.00  | Open injury of lung                                          |
| 6  |                |                                                              |
| 7  | 57559 SF03.00  | Crushing injury of skull                                     |
| 8  | 57557 S73x100  | Pancreas head injury without open wound into cavity          |
| 9  | 34737 S231700  | Open fracture radial neck                                    |
| 10 | 5953 SE02.00   | Contusion, nose                                              |
| 11 | 57439 S331z00  | Open fracture of tibia and fibula, proximal NOS              |
| 12 |                |                                                              |
| 13 | 36103 SH22900  | Deep partial thickness burn of the chest wall                |
| 14 | 64742 SD30300  | Abrasion wrist, dorsum                                       |
| 15 | 57402 SB41100  | Open injury, superficial femoral artery                      |
| 16 | 22137 S440300  | Closed traumatic dislocation, distal interphalangeal joint   |
| 17 | 44715 S200000  | Closed fracture of clavicle, unspecified part                |
| 18 |                |                                                              |
| 19 | 98016 7J41200  | Posterior decompression of fracture of spine                 |
| 20 | 101840 S331A00 | Open fracture tibial plateau                                 |
| 21 | 28739 S220400  | Closed fracture proximal humerus, head                       |
| 22 |                |                                                              |
| 23 | 60583 SB45400  | Posterior tibial vein injury                                 |
| 24 | 57239 S781z00  | Other/mult abdominal organ injury with open wnd to cavity    |
| 25 | 57223 SR16000  | Closed fracture inv thorax wth low back and pelvis and limbs |
| 26 | 70410 TN71.00  | Injury ?accidental, fall from other man-made structure       |
| 27 | 40510 SD31z00  | Abrasion or friction burn of lower arm, infected, NOS        |
| 28 | 28197 S261R00  | Open fracture finger distal phalanx                          |
| 29 |                |                                                              |
| 30 | 69756 SH73100  | Burn of the small intestine                                  |
| 31 | 29981 S4F4.00  | Closed fracture-dislocation, patello-femoral joint           |
| 32 | 12612 S86..00  | Open wound of back                                           |
| 33 | 56975 S421200  | Open traumatic dislocation elbow joint, posterior            |
| 34 | 48050 SA22.00  | Open wound of foot with tendon involvement                   |
| 35 | 17490 SF10112  | Crush injury of testis                                       |
| 36 |                |                                                              |
| 37 | 44619 SH53.00  | Full thickness burn of the leg                               |
| 38 | 63868 S712100  | Lung contusion without mention of open wound into thorax     |
| 39 | 56881 SH45.11  | Deep third degree burn of finger with loss of a body part    |
| 40 | 56877 TN5z.00  | Injury ?accidental, by firearm or explosive NOS              |
| 41 |                |                                                              |
| 42 | 95148 SB2z.00  | Injury to abdominal and pelvic blood vessel NOS              |
| 43 | 51988 SJ32200  | Lumbar nerve root injury - L3                                |
| 44 | 35018 S135z00  | Other/multiple open fracture of pelvis NOS                   |
| 45 | 31836 TN1..00  | Injury ?accidental, poisoning by gases in domestic use       |
| 46 | 5929 S2...11   | Arm fracture                                                 |
| 47 |                |                                                              |
| 48 | 56638 S630.00  | Other cerebral h'ge after injury no open intracranial wound  |
| 49 | 56599 S4H0000  | Closed fracture-dislocation, subtalar joint                  |
| 50 | 99019 S011000  | Closed #skull bse + intracranial inj, unspec state of consc  |
| 51 | 56574 SJ02.00  | Optic pathway injury                                         |
| 52 | 40695 SJ13.00  | Abducens (6th) nerve injury                                  |
| 53 |                |                                                              |
| 54 | 56532 S82w300  | Open wound of cochlea with complication                      |
| 55 | 100286 S723000 | Open injury of bronchus                                      |
| 56 | 56523 SH21000  | Superficial burn of unspecified part of the trunk            |
| 57 | 4225 S024000   | Closed fracture maxilla                                      |
| 58 |                |                                                              |
| 59 | 68262 S4C3600  | Open fracture-subluxation peri-lunate trans-scaploid         |
| 60 | 27591 S234z00  | Closed fracture of forearm, lower end, NOS                   |
|    | 9873 SA...11   | Open wound of leg                                            |

|    |                |                                                              |
|----|----------------|--------------------------------------------------------------|
| 1  |                |                                                              |
| 2  | 57369 SF02100  | Crush injury, larynx                                         |
| 3  | 30275 SE24400  | Contusion, vagina                                            |
| 4  | 25946 SH0..13  | Eyelid burns                                                 |
| 5  | 107020 SD2z100 | Superficial injury of scapular region NOS, infected          |
| 6  | 63610 S771000  | Open injury of bladder                                       |
| 7  | 62978 SH42D00  | Deep partial thickness burn of the palm of hand              |
| 8  | 20930 SJ71.00  | Injury of peripheral nerves of neck                          |
| 9  | 31847 S362100  | Open fracture of great toe                                   |
| 10 | 94088 SJ66000  | Injury of multiple nerves at lower leg level                 |
| 11 | 57196 S4F3.00  | Open fracture-subluxation, knee joint                        |
| 12 | 29164 S33y000  | Open fracture of tibia, unspecified part, NOS                |
| 13 | 47593 S851.00  | Open wound of chest wall with complication                   |
| 14 | 71084 SH34500  | Deep full thickness burn of shoulder, no loss of body part   |
| 15 | 32348 S224400  | Closed fracture of distal humerus, condyle(s) unspecified    |
| 16 | 12542 S47..12  | Dislocation of talus                                         |
| 17 | 17286 S241100  | Open fracture of the scaphoid                                |
| 18 | 48472 S780212  | Gallbladder injury without open wound into cavity            |
| 19 | 72540 SH44.12  | Deep third degree burn of hand, without loss of a body part  |
| 20 | 25470 S920000  | Open wound of hand, palm                                     |
| 21 | 4851 S440.00   | Closed traumatic dislocation digit                           |
| 22 | 53034 SH42F00  | Deep partial thickness burn of wrist                         |
| 23 | 94649 S130100  | Closed fracture acetabulum, posterior lip alone              |
| 24 | 55777 SD01100  | Abrasion of neck, infected                                   |
| 25 | 31630 SA11100  | Open wound of lower leg with complication                    |
| 26 | 35889 7J13200  | Closed reduction of fracture of maxilla NEC                  |
| 27 | 65228 S335100  | Open fracture distal tibia, intra-articular                  |
| 28 | 68765 S241200  | Open fracture lunate                                         |
| 29 | 54362 N226.12  | Nontraumatic tendon dislocation                              |
| 30 | 55444 SA01100  | Open wound of thigh with complication                        |
| 31 | 55531 S02x200  | Fracture of palate, closed                                   |
| 32 | 6303 S640111   | Minor head injury                                            |
| 33 | 55447 7K1H200  | Secondary open reduction of intraarticular fracture of bone  |
| 34 | 71059 S490112  | Closed dislocation of first cervical vertebra (C1)           |
| 35 | 51018 S118.00  | Closed fracture of coccyx with spinal cord lesion            |
| 36 | 55435 SA03100  | Degloving injury, thigh                                      |
| 37 | 42704 E2A2.12  | Post-head injury syndrome                                    |
| 38 | 95728 S4H2400  | Closed fracture-subluxation, IPJ, single toe                 |
| 39 | 55417 SD6zz00  | Superficial injury of lower limb, infected, NOS              |
| 40 | 11235 S834.00  | Open wound of face                                           |
| 41 | 66853 S281.00  | Open ill-defined fractures of upper limb                     |
| 42 | 39775 SE05.12  | Bruise of auricle                                            |
| 43 | 21263 SE05.11  | Bruise of ear                                                |
| 44 | 62743 S003z00  | Open #skull vlt with intracranial injury + concussion unspec |
| 45 | 71710 SB0yz00  | Other head and neck blood vessel injury NOS                  |
| 46 | 55212 S4C0600  | Closed fracture-dislocation peri-lunate trans-scaphoid       |
| 47 | 31076 S496700  | Closed traumatic dislocation costo-chondral joint            |
| 48 | 15578 S77..00  | Injury to pelvic organs                                      |
| 49 | 64417 S713000  | Lung injury with open wound into thorax, unspecified         |
| 50 | 54977 SH23300  | Full thickness burn of the abdominal wall                    |
| 51 | 6069 7K1LH00   | Closed reduction of fracture of finger                       |

|    |                |                                                             |
|----|----------------|-------------------------------------------------------------|
| 1  |                |                                                             |
| 2  | 12406 S10B.00  | Fracture of lumbar spine and pelvis                         |
| 3  | 97971 S303300  | Open fracture proximal femur, intertrochanteric, comminuted |
| 4  | 50781 S261z00  | Open fracture of one or more phalanges of hand NOS          |
| 5  | 64113 S261G00  | Open fracture finger proximal phalanx, neck                 |
| 6  | 52362 SA23200  | Degloving injury heel                                       |
| 7  |                |                                                             |
| 8  | 1563 SJ7z.00   | Injury to other nerve NOS                                   |
| 9  | 48213 SH52000  | Superficial partial thickness burn of the leg, unspecified  |
| 10 | 45529 S313000  | Open fracture distal femur, unspecified                     |
| 11 | 65084 S135.00  | Other or multiple open fracture of pelvis                   |
| 12 |                |                                                             |
| 13 | 109693 7K6Gy00 | Primary closed reduction of traumatic joint dislocation OS  |
| 14 | 7754 S225.11   | Elbow fracture - open                                       |
| 15 | 9223 S42z.00   | Dislocation of elbow NOS                                    |
| 16 | 63899 S225500  | Open fracture of distal humerus, trochlea                   |
| 17 | 22856 SH5..11  | Leg burns                                                   |
| 18 |                |                                                             |
| 19 | 35823 SH31500  | Superficial burn of the shoulder                            |
| 20 | 66809 SJ50100  | Open injury, axillary nerve                                 |
| 21 | 54673 SJ6x200  | Closed injury pudendal nerve                                |
| 22 | 14963 SH10300  | Unspecified thickness burn of the lip(s)                    |
| 23 | 54646 SB45100  | Anterior tibial artery injury, unspecified                  |
| 24 |                |                                                             |
| 25 | 60163 S225200  | Open fracture distal humerus, lateral condyle               |
| 26 | 99566 TK01100  | Suicide and self inflicted injury by Barbitone              |
| 27 | 28033 7K6FA00  | Primary open reduction of dislocation and wire fixation     |
| 28 | 53707 Q416100  | Perinatal cutaneous bruising                                |
| 29 | 73786 SR10000  | Closed fractures involving head with neck                   |
| 30 |                |                                                             |
| 31 | 51861 S300311  | Closed fracture, base of neck of femur                      |
| 32 | 33719 S450000  | Closed traumatic dislocation of hip, unspecified            |
| 33 | 54361 SB24200  | Renal vein injury                                           |
| 34 | 64455 S735400  | Sigmoid colon injury with open wound into cavity            |
| 35 | 39325 SJ33.00  | Sacral nerve root injury                                    |
| 36 |                |                                                             |
| 37 | 54280 S330200  | Closed fracture of tibia and fibula, proximal               |
| 38 | 71953 S211600  | Open fracture scapula, neck                                 |
| 39 | 54242 S312600  | Closed fracture distal femur, bicondylar (T-Y fracture)     |
| 40 | 62833 S224x00  | Closed fracture of distal humerus, multiple                 |
| 41 |                |                                                             |
| 42 | 101318 S103500 | Open fracture thoracic vertebra, posterior arch             |
| 43 | 23829 SF10000  | Crush injury, penis                                         |
| 44 | 20411 SE12.00  | Contusion, orbital tissues                                  |
| 45 | 47830 S490200  | Closed dislocation atlanto-axial joint                      |
| 46 | 47384 SJ12.11  | Fifth cranial nerve injury                                  |
| 47 | 66233 S233100  | Open fracture of the radial shaft                           |
| 48 |                |                                                             |
| 49 | 29145 S302200  | Closed fracture proximal femur, subtrochanteric             |
| 50 | 54123 S261W00  | Open fracture finger distal phalanx, multiple               |
| 51 | 54121 S870.00  | Open wound of buttock, uncomplicated                        |
| 52 | 54073 SJ6..11  | Leg peripheral nerve injury                                 |
| 53 |                |                                                             |
| 54 | 38502 SJ5C.00  | Posterior interosseous nerve injury                         |
| 55 | 67669 S135600  | Open fracture pelvis, iliac wing                            |
| 56 | 6189 SH3..00   | Burn of the arm (excluding wrist and hand)                  |
| 57 | 51147 7J13500  | Reduction of Le Fort 2 fracture of maxilla                  |
| 58 | 49492 S93..11  | Open wound of fingernail                                    |
| 59 | 37407 SH51200  | Superficial burn of the foot                                |
| 60 | 109408 SJ41300 | Inferior mesenteric plexus injury                           |



|    |                |                                                              |
|----|----------------|--------------------------------------------------------------|
| 1  |                |                                                              |
| 2  | 35844 SD1..00  | Superficial injury of trunk                                  |
| 3  | 31850 S490300  | Closed dislocation C2/C3                                     |
| 4  | 11999 SH1..11  | Face burns                                                   |
| 5  | 28875 S352J00  | Closed fracture of base of fifth metatarsal                  |
| 6  | 423 S45..00    | Dislocation or subluxation of hip                            |
| 7  |                |                                                              |
| 8  | 10615 SD10100  | Abrasion, chest wall                                         |
| 9  | 44374 SB3z.00  | Arm blood vessel injury NOS                                  |
| 10 | 19403 S240B00  | Closed fracture scaphoid, waist, transverse                  |
| 11 | 15629 TG80100  | Accidental burning/scalding caused by boiling liquid, unspec |
| 12 | 65541 SH42.14  | Second degree burn of thumb                                  |
| 13 | 38013 SH12z00  | Partial thickness burn of the face, head or neck NOS         |
| 14 | 52067 S253.00  | Open fracture sesamoid bone of hand                          |
| 15 | 16494 S120100  | Closed fracture of one rib                                   |
| 16 | 94584 S117300  | Open fracture of sacrum with other spinal cord injury        |
| 17 | 36860 S912z00  | Open wound of lower arm with tendon involvement, NOS         |
| 18 | 28179 S200z00  | Closed fracture of clavicle NOS                              |
| 19 | 99516 S102500  | Closed fracture thoracic vertebra, posterior arch            |
| 20 | 68932 S465300  | Closed traumatic dislocation knee joint, medial              |
| 21 | 71452 S121900  | Open fracture multiple ribs                                  |
| 22 | 67752 SH80000  | Burn:<10% of body surface, 10%/unspec BS full thickness      |
| 23 | 59420 S496400  | Closed traumatic dislocation, sterno-clavicular joint, post  |
| 24 | 105699 S61yz00 | Brain cont + open intracranial wound + concussion unspec     |
| 25 | 44249 SJ70.00  | Head and neck superficial nerve injury                       |
| 26 | 6917 S336.00   | Fracture of upper end of tibia                               |
| 27 | 53364 SD31100  | Abrasion of forearm, infected                                |
| 28 | 58074 SH42700  | Superficial partial thickness burn of the wrist              |
| 29 | 53356 SH11x00  | Superficial burn of multiple sites of the face, head or neck |
| 30 | 66915 TK5..00  | Suicide and selfinflicted injury by firearms and explosives  |
| 31 | 30124 S835.00  | Open wound of face with complication                         |
| 32 | 60706 SB42000  | Closed injury, femoral vein                                  |
| 33 | 8613 S10B600   | Multiple fractures of lumbar spine and pelvis                |
| 34 | 280 S120.00    | Closed fracture rib                                          |
| 35 | 50654 S23x000  | Closed fracture of forearm, unspecified                      |
| 36 | 8266 S104100   | Closed fracture lumbar vertebra, wedge                       |
| 37 | 69652 SD0z100  | Superficial injury of neck NOS, infected                     |
| 38 | 11327 SF3..00  | Crush injury, lower limb                                     |
| 39 | 52968 S63..00  | Other cerebral haemorrhage following injury                  |
| 40 | 46443 SJ20.00  | Cervical cord injury without evidence of spinal bone injury  |
| 41 | 27783 S4C0300  | Closed fracture-dislocation, carpometacarpal joint           |
| 42 | 52934 SH42z00  | Partial thickness burn of the wrist or hand NOS              |
| 43 | 31012 SQ...00  | Open wounds involving multiple body regions                  |
| 44 | 10661 SD1y200  | Superficial injury of breast NOS, without major open wound   |
| 45 | 72138 S301100  | Open fracture proximal femur, transepiphyseal                |
| 46 | 42149 S100C00  | Closed fracture axis, spinous process                        |
| 47 | 52845 SH42900  | Deep partial thickness burn of a single finger               |
| 48 | 96438 S4D3600  | Open fracture-subluxation multiple digits                    |
| 49 | 5682 S62..00   | Cerebral haemorrhage following injury                        |
| 50 | 52809 SF30300  | Open crush injury, thigh                                     |
| 51 | 100251 SH32D00 | Deep partial thickness burn of the scapular region           |
| 52 | 59411 S4G2.00  | Closed fracture-subluxation, ankle joint                     |

|    |                |                                                              |
|----|----------------|--------------------------------------------------------------|
| 1  |                |                                                              |
| 2  | 59077 SB34.00  | Palmar artery injury                                         |
| 3  | 28342 S804.00  | Penetrating wound of orbit with foreign body                 |
| 4  | 62288 S495.00  | Open dislocation of other vertebra                           |
| 5  | 30669 S85..00  | Open wound of chest wall                                     |
| 6  | 23758 S7...12  | Internal injury of abdomen                                   |
| 7  |                |                                                              |
| 8  | 45923 SJ14.11  | Seventh cranial nerve injury                                 |
| 9  | 5995 SD60.00   | Abrasion/friction burn of lower limb, without infection      |
| 10 | 52620 TG8y400  | Accidental burning or scalding caused by plastic             |
| 11 | 41935 SJ80.00  | Concussion and oedema of cervical spinal cord                |
| 12 |                |                                                              |
| 13 | 73288 SH73z00  | Burn of the gastrointestinal tract NOS                       |
| 14 | 52499 S330800  | Closed fracture fibula, head                                 |
| 15 | 436 S42..00    | Dislocation or subluxation of elbow                          |
| 16 | 52450 SD0z.00  | Superficial injury of face/neck/scalp NOS, infected          |
| 17 | 34077 S49G.00  | Dislocation of septal cartilage of nose                      |
| 18 |                |                                                              |
| 19 | 32011 S025000  | Open fracture maxilla                                        |
| 20 | 59497 S84x100  | Open wound of supraclavicular region                         |
| 21 | 33593 S01z.00  | Fracture of base of skull NOS                                |
| 22 | 33695 S260T00  | Closed fracture finger distal phalanx, shaft                 |
| 23 | 106895 S741.00 | Open injury of liver                                         |
| 24 |                |                                                              |
| 25 | 24686 SH23100  | Full thickness burn of the breast                            |
| 26 | 12835 SA13.00  | Degloving injury, knee or leg or ankle                       |
| 27 | 34839 SD7..00  | Superficial injury of foot and toe(s)                        |
| 28 | 94477 S780000  | Intra-abdominal organ injury no open wnd into cavity, unspec |
| 29 | 37263 N083612  | Patella-recurrent dislocation                                |
| 30 |                |                                                              |
| 31 | 52321 SH23200  | Full thickness burn of the chest wall                        |
| 32 | 41287 S320400  | Closed fracture patella, comminuted (stellate)               |
| 33 | 91658 7J41400  | Posterior decompression of fracture of spine NEC             |
| 34 | 52300 S110.00  | Closed fracture of cervical spine with cord lesion           |
| 35 | 54590 SH40700  | Unspecified thickness burn of the wrist                      |
| 36 |                |                                                              |
| 37 | 48931 S730.00  | Stomach injury without mention of open wound into cavity     |
| 38 | 2630 S33..00   | Fracture of tibia and fibula                                 |
| 39 | 7660 S230700   | Closed fracture radius, neck                                 |
| 40 | 39816 S102000  | Closed fracture thoracic vertebra, burst                     |
| 41 | 71567 S125.00  | Closed fracture larynx and trachea                           |
| 42 |                |                                                              |
| 43 | 43600 7J42400  | Halo skull traction for fracture of spine                    |
| 44 | 40643 S134000  | Closed fracture of ilium, unspecified                        |
| 45 | 8015 7K6GB00   | Closed reduction of dislocation of patella                   |
| 46 | 109464 SH21x00 | Superficial burn of multiple sites of the trunk              |
| 47 | 51682 S602.00  | Concussion with 1-24 hours loss of consciousness             |
| 48 |                |                                                              |
| 49 | 96534 TN30.00  | Injury ?accidental, hanging                                  |
| 50 | 45224 N083200  | Recurrent joint dislocation, of the upper arm                |
| 51 | 40653 S4F0.00  | Closed fracture-dislocation, knee joint                      |
| 52 | 61374 S231500  | Open fracture of the proximal ulna                           |
| 53 |                |                                                              |
| 54 | 103251 SB23z00 | Portal and splenic vein injury NOS                           |
| 55 | 41801 S480800  | Closed traumatic dislocation toe, IPJ, multiple              |
| 56 | 10937 S834200  | Open wound of forehead                                       |
| 57 | 44598 SJ41000  | Coeliac ganglion injury                                      |
| 58 | 8800 7K1L600   | Closed reduction of fracture of knee                         |
| 59 | 19189 S10A200  | Multiple fractures of cervical spine                         |
| 60 | 104011 SB44400 | Closed injury, popliteal vein                                |



|    |               |                                                              |
|----|---------------|--------------------------------------------------------------|
| 1  |               |                                                              |
| 2  | 51754 SK1x600 | Injury of multiple intra-abdominal organs                    |
| 3  | 56124 S771100 | Open injury of urethra                                       |
| 4  | 22144 7K6GN00 | Closed reduction fracture disloc joint & internal fixation   |
| 5  | 93834 S78z.00 | Other intra-abdominal organ injury, NOS                      |
| 6  | 61388 S03..00 | Other and unqualified skull fractures                        |
| 7  | 33808 S232z00 | Closed fracture of radius and ulna, shaft, NOS               |
| 8  | 33883 S230900 | Closed fracture of the proximal radius                       |
| 9  | 55999 7K6GU00 | Primary closed reduction of dislocation+fixation by wire(s)  |
| 10 | 47711 SB48000 | Injury of dorsal vein of foot                                |
| 11 | 28172 S82z.00 | Open wound of ear NOS                                        |
| 12 | 59943 S221500 | Open fracture of humerus, upper epiphysis                    |
| 13 | 93068 SA01000 | Open wound of hip with complication                          |
| 14 | 8112 SH...00  | Burns                                                        |
| 15 | 28393 S224800 | Closed fracture distal humerus, capitellum                   |
| 16 | 6002 TGyz300  | Accidental injury NOS                                        |
| 17 | 69409 SH43z00 | Full thickness burn of the wrist or hand NOS                 |
| 18 | 62841 S001600 | Closed #skull vlt + intracranial injury, LOC unspc duration  |
| 19 | 35121 SD06200 | Splinter of scalp, without major open wound                  |
| 20 | 17922 S4C0000 | Closed fracture-dislocation distal radio-ulnar joint         |
| 21 | 62853 S251000 | Open fracture of metacarpal bone(s), site unspecified        |
| 22 | 28293 S234E00 | Closed fracture distal radius, intra-articular, other type   |
| 23 | 5952 SE41100  | Contusion, knee                                              |
| 24 | 72434 SH85.00 | Burn involving 50-59% of body surface (BS)                   |
| 25 | 15622 7J42500 | Spinal traction for fracture of spine NEC                    |
| 26 | 51170 S313.00 | Open fracture distal femur                                   |
| 27 | 11161 S028300 | Fracture of mandible                                         |
| 28 | 69156 S711000 | Heart injury with open wound into thorax, unspecified        |
| 29 | 66769 SF02z00 | Crush injury, neck NOS                                       |
| 30 | 98393 S100800 | Closed fracture atlas, isolated arch or articular process    |
| 31 | 5280 S028000  | Fracture of nasal bones                                      |
| 32 | 27654 S100600 | Closed fracture of sixth cervical vertebra                   |
| 33 | 25129 SH40100 | Unspecified thickness burn of a single finger                |
| 34 | 10454 S47..00 | Dislocation or subluxation of ankle                          |
| 35 | 53689 S234911 | Closed volar Barton's fracture-dislocation                   |
| 36 | 48722 SH20.00 | Unspecified thickness burn of the trunk                      |
| 37 | 70864 S201000 | Open fracture of clavicle, unspecified part                  |
| 38 | 50795 SB33.00 | Ulnar blood vessel injury                                    |
| 39 | 48654 S77v400 | Vas deferens injury without open wound into cavity           |
| 40 | 28108 S912.11 | Open wound of lower arm with tendon injury                   |
| 41 | 27745 SE33.00 | Contusion, finger                                            |
| 42 | 50756 SH34100 | Deep full thickness burn of forearm, no loss of body part    |
| 43 | 50749 S133.00 | Open fracture of pubis                                       |
| 44 | 97720 SH81000 | Burn: 10-14% of body surface, <10%/unsp BS full thickness    |
| 45 | 92354 S040.00 | Mult #skull/face+other bones, closed, no intracranial injury |
| 46 | 2864 S640.00  | Intracranial injury NOS no open intracranial wound           |
| 47 | 50652 TG81z00 | Accidental burning caused by caustic or corrosive NOS        |
| 48 | 34080 S260900 | Closed fracture thumb distal phalanx, base                   |
| 49 | 93916 SD1z700 | Superficial injury of flank NOS, infected                    |
| 50 | 19962 SE2z.00 | Contusion, trunk NOS                                         |
| 51 | 42874 S430700 | Closed traumatic dislocation peri-lunate (dorsal)            |

|    |                |                                                             |
|----|----------------|-------------------------------------------------------------|
| 1  |                |                                                             |
| 2  | 101960 SJ34500 | Open injury, brachial plexus, all roots (complete)          |
| 3  | 50549 S320100  | Closed fracture patella, proximal pole                      |
| 4  | 53856 SF31300  | Closed crush injury, knee                                   |
| 5  | 19309 S814.00  | Eye laceration, unspecified                                 |
| 6  | 14878 S024.00  | Fracture of malar or maxillary bones, closed                |
| 7  | 50502 TN00.00  | Injury ?accidental, poisoning by analgesic or anti-pyretic  |
| 8  | 60487 S4D2200  | Closed fracture-subluxation IPJ, unspecified                |
| 9  | 105695 S105400 | Open fracture lumbar vertebra, transverse process           |
| 10 | 53684 SB21.00  | Inferior vena cava injury                                   |
| 11 | 73426 S223z00  | Open fracture of humerus, shaft or unspecified part NOS     |
| 12 | 40533 S120200  | Closed fracture of two ribs                                 |
| 13 | 29982 S47..11  | Dislocation of fibula, distal end                           |
| 14 | 28279 S440z00  | Closed traumatic dislocation of finger NOS                  |
| 15 | 11969 S128.00  | Fracture of sternum                                         |
| 16 | 102256 SB47000 | Injury of peroneal artery                                   |
| 17 | 50345 S77w400  | Vas deferens injury with open wound into cavity             |
| 18 | 23860 SH92.11  | Second degree burn                                          |
| 19 | 66765 S000300  | Closed #skull vlt no intracranial injury, 1-24hr loss consc |
| 20 | 49298 S810.00  | Ocular laceration without intraocular prolapse              |
| 21 | 17870 SE13.00  | Contusion, eyeball                                          |
| 22 | 68031 S779.00  | Injury of ovary                                             |
| 23 | 66576 7G2CA00  | Escharotomy of burnt skin of arm                            |
| 24 | 41982 SA00000  | Open wound of hip                                           |
| 25 | 99376 S116z00  | Closed fracture of sacrum with spinal cord lesion NOS       |
| 26 | 31999 S240800  | Closed fracture hamate                                      |
| 27 | 71976 SA11z00  | Open wound of knee/leg/ankle with complication, NOS         |
| 28 | 98681 S235111  | Smith's fracture - open                                     |
| 29 | 43331 S780.00  | Closed injury other intra-abdominal structure               |
| 30 | 989 S89z.00    | Other open wounds NOS                                       |
| 31 | 52305 S251300  | Open fracture finger metacarpal shaft                       |
| 32 | 29332 N331y00  | Other specified pathological fracture                       |
| 33 | 8670 SE33100   | Contusion, thumb                                            |
| 34 | 50517 S361000  | Open fracture proximal phalanx, toe                         |
| 35 | 20668 TN7..00  | Injury ?accidental, fall from high place                    |
| 36 | 37416 SD00.11  | Abrasion or friction burn of head without infection         |
| 37 | 58752 S4B2.00  | Closed fracture-subluxation elbow                           |
| 38 | 102046 S261V00 | Open fracture finger distal phalanx, mallet                 |
| 39 | 32812 SK1C500  | Injury of multiple muscles and tendons at forearm level     |
| 40 | 49826 SC04.00  | Late effect of other fracture of leg                        |
| 41 | 49821 S353300  | Open fracture cuboid                                        |
| 42 | 25132 SB0y000  | External jugular vein injury                                |
| 43 | 49798 S331700  | Open fracture tubercle, tibia                               |
| 44 | 35425 SD20200  | Abrasion, axillary area                                     |
| 45 | 49745 SA02.11  | Open wound of hip and thigh with tendon injury              |
| 46 | 70859 S731.00  | Stomach injury with open wound into cavity                  |
| 47 | 17491 SE2..00  | Contusion, trunk                                            |
| 48 | 59868 S712z00  | Lung injury without mention of open wound into thorax NOS   |
| 49 | 49623 SA13000  | Degloving injury, knee                                      |
| 50 | 70407 S740.00  | Closed injury of liver                                      |
| 51 | 49594 SH51000  | Superficial burn of the leg, unspecified                    |

|    |               |                                                             |
|----|---------------|-------------------------------------------------------------|
| 1  |               |                                                             |
| 2  | 868 S4...13   | Fracture dislocations and fracture subluxations             |
| 3  | 5951 7K1LM00  | Closed reduction of fracture of wrist                       |
| 4  | 41138 S102z00 | Closed fracture thoracic vertebra not otherwise specified   |
| 5  | 49529 7J42200 | Manipulative reduction of fracture of spine                 |
| 6  |               |                                                             |
| 7  | 28413 S240300 | Closed fracture triquetral                                  |
| 8  | 62827 S837z00 | Open wound in mouth with complication, NOS                  |
| 9  | 30391 7J18200 | Reduction of dislocation of temporomandibular joint         |
| 10 | 33971 SF21.00 | Crush injury elbow or forearm                               |
| 11 | 11476 SA13100 | Degloving injury, lower leg                                 |
| 12 |               |                                                             |
| 13 | 45872 SA12.00 | Open wound of knee, leg and ankle with tendon involvement   |
| 14 | 53566 S131.00 | Open fracture acetabulum                                    |
| 15 | 49259 SD0y200 | Superficial injury of scalp NOS                             |
| 16 | 33518 N083L00 | Habitual dislocation of the shoulder                        |
| 17 | 70886 SA13200 | Degloving injury, ankle                                     |
| 18 |               |                                                             |
| 19 | 47774 SB41.00 | Superficial femoral artery injury                           |
| 20 | 12613 SK1E.00 | Injury of muscle and tendon at lower leg level              |
| 21 | 63253 S103.00 | Open fracture thoracic vertebra                             |
| 22 | 58717 SJ35000 | Closed injury sacral plexus                                 |
| 23 |               |                                                             |
| 24 | 41707 S022500 | Closed fracture of mandible, angle of jaw                   |
| 25 | 61396 SB3x000 | Injury of multiple blood vessels at forearm level           |
| 26 | 48942 SD3yz00 | Superficial injury of lower arm, without infection NOS      |
| 27 | 61514 S735500 | Rectum injury with open wound into cavity                   |
| 28 | 65309 TK54.00 | Suicide and selfinflicted injury by other firearm           |
| 29 |               |                                                             |
| 30 | 31764 N082400 | Pathological dislocation of the hand                        |
| 31 | 51924 SJ44.00 | Iliolumbar nerve injury                                     |
| 32 | 57978 SJ1z.00 | Injury to other cranial nerve NOS                           |
| 33 | 70486 S221400 | Open fracture proximal humerus, head                        |
| 34 | 70684 SH12B00 | Deep partial thickness burn of the ear                      |
| 35 |               |                                                             |
| 36 | 50267 S739.00 | Injury of rectum                                            |
| 37 | 60518 S233000 | Open fracture of radius, shaft, unspecified                 |
| 38 | 8243 S305.00  | Subtrochanteric fracture                                    |
| 39 | 48817 SJ11.00 | Trochlear (4th) nerve injury                                |
| 40 |               |                                                             |
| 41 | 73824 S241B00 | Open fracture scaphoid, waist, transverse                   |
| 42 | 45934 SR11.00 | Fractures involving thorax with lower back and pelvis       |
| 43 | 44800 SH42200 | Superficial partial thickness burn of the thumb             |
| 44 | 60343 S4C3000 | Open fracture-subluxation, distal radio-ulnar joint         |
| 45 | 38844 S903.00 | Degloving injury, shoulder or upper arm                     |
| 46 | 203 S234.11   | Wrist fracture - closed                                     |
| 47 | 16220 SD9y.00 | Other superficial injury, without mention of infection, NOS |
| 48 |               |                                                             |
| 49 | 48695 SB47200 | Injury of lesser saphenous vein at lower leg level          |
| 50 | 66341 SC1..00 | Late effect of skin and subcutaneous tissue injury          |
| 51 | 28478 SF02000 | Crush injury, throat, unspecified                           |
| 52 |               |                                                             |
| 53 | 1857 S354.00  | Fracture of calcaneus                                       |
| 54 | 31761 S41..11 | Dislocation of humerus                                      |
| 55 | 54238 SH22500 | Superficial partial thickness burn of the buttock           |
| 56 | 48635 S420200 | Closed traumatic dislocation elbow joint, posterior         |
| 57 | 50080 SB14.00 | Innominate (brachiocephalic) vein injury                    |
| 58 | 48596 S722200 | Closed injury of pleura                                     |
| 59 |               |                                                             |
| 60 | 72822 S4H2600 | Closed fracture-subluxation, IPJ, multiple toes             |
|    | 48540 SAA..00 | Open wounds involving multiple regions of lower limb(s)     |

|    |                |                                                             |
|----|----------------|-------------------------------------------------------------|
| 1  |                |                                                             |
| 2  | 49801 S331012  | Open fracture of tibial tuberosity                          |
| 3  | 724 SK13111    | Injury arm                                                  |
| 4  | 99151 S101511  | C5 vertebra open fracture without spinal cord lesion        |
| 5  | 18301 S235F00  | Open Barton's fracture                                      |
| 6  | 97064 S013.00  | Open fracture base of skull with intracranial injury        |
| 7  | 17776 S920100  | Open wound of hand, dorsum                                  |
| 8  | 48245 S233300  | Open fracture radius and ulna, middle                       |
| 9  | 48239 S221300  | Open fracture proximal humerus, greater tuberosity          |
| 10 | 73279 SD1z400  | Superficial injury of back NOS, infected                    |
| 11 | 100506 SJ64100 | Open injury cutaneous sensory nerve, leg                    |
| 12 | 71480 SJ53300  | Open injury, radial nerve, sensory branch                   |
| 13 | 48185 S801.00  | Full thickness eyelid laceration no lacrimal passage damage |
| 14 | 66152 SJ31500  | Thoracic nerve root injury - T6                             |
| 15 | 40433 S780400  | Retroperitoneum injury without open wound into cavity       |
| 16 | 35310 S465000  | Closed traumatic dislocation of knee, unspecified           |
| 17 | 51703 S738.00  | Injury of colon                                             |
| 18 | 35260 S150000  | Closed multiple fractures of thoracic spine                 |
| 19 | 4008 S921.00   | Open wound of hand with complication                        |
| 20 | 24074 SJ66.00  | Injury of nerves at lower leg level                         |
| 21 | 2050 SK17.11   | Injury toe                                                  |
| 22 | 19416 SJ30.00  | Cervical nerve root injury                                  |
| 23 | 25539 SH40z00  | Unspecified thickness burn of the wrist or hand NOS         |
| 24 | 30347 SE24z00  | Contusion, genital organs NOS                               |
| 25 | 56433 SH23.00  | Full thickness burn of the trunk                            |
| 26 | 47847 S251z00  | Open fracture of metacarpal bone(s) NOS                     |
| 27 | 42076 S234400  | Closed fracture of ulna, lower epiphysis                    |
| 28 | 33414 SH52.00  | Partial thickness burn of the leg                           |
| 29 | 72455 SJ63100  | Closed injury superficial peroneal nerve                    |
| 30 | 12369 S339100  | Open fracture of distal fibula                              |
| 31 | 7009 S230600   | Closed fracture radius, head                                |
| 32 | 37318 S494.00  | Closed dislocation of other vertebra                        |
| 33 | 25312 7J13300  | Reduction of blowout fracture of orbital floor              |
| 34 | 61581 SH12700  | Superficial partial thickness burn of the forehead          |
| 35 | 22636 S930200  | Open wound, thumb                                           |
| 36 | 50053 S234A00  | Closed dorsal Barton's fracture                             |
| 37 | 34401 SD00100  | Abrasion/friction burn of neck, without infection           |
| 38 | 62850 SH32500  | Superficial partial thickness burn of the shoulder          |
| 39 | 65732 TN21.00  | Injury ?accidental, poisoning by other carbon monoxide      |
| 40 | 27775 S465.00  | Other closed traumatic dislocation of knee                  |
| 41 | 24672 S100700  | Closed fracture of seventh cervical vertebra                |
| 42 | 73057 S430y00  | Other closed traumatic dislocation of wrist                 |
| 43 | 63064 7J03y00  | Other specified reduction of fracture of facial bone        |
| 44 | 47796 SB0y011  | Jugular vein injury NOS                                     |
| 45 | 70657 S713100  | Lung contusion with open wound into thorax                  |
| 46 | 40280 SJ67000  | Injury of lateral plantar nerve                             |
| 47 | 94398 S464000  | Open traumatic dislocation patello-femoral joint, lateral   |
| 48 | 46955 S352900  | Closed fracture talus, neck                                 |
| 49 | 57981 S14z.00  | Fracture of ill-defined bone of trunk NOS                   |
| 50 | 16322 S480400  | Closed traumatic metatarsal dislocation, unspecified        |
| 51 | 46798 S4C3100  | Open fracture-subluxation radiocarpal joint                 |

|    |                |                                                              |
|----|----------------|--------------------------------------------------------------|
| 1  |                |                                                              |
| 2  | 69010 SH32000  | Superficial partial thickness burn of the arm, unspecified   |
| 3  | 97343 SJ5C100  | Open injury, posterior interosseous nerve                    |
| 4  | 67871 SH31x00  | Superficial burn of multiple sites of the arm                |
| 5  | 8375 SD3y200   | Superficial injury of wrist NOS                              |
| 6  |                |                                                              |
| 7  | 42251 SD1y300  | Superficial injury abdom wall NOS, without major open wound  |
| 8  | 46592 S132200  | Closed fracture pelvis, multiple pubic rami - unstable       |
| 9  | 4359 S23x300   | Closed fracture of the radius and ulna                       |
| 10 | 36808 SJB2.00  | Injury of superficial vein at shoulder and upper arm level   |
| 11 | 89228 S913300  | Degloving injury wrist, dorsum                               |
| 12 |                |                                                              |
| 13 | 46482 SB15.00  | Subclavian vein injury                                       |
| 14 | 71940 SB46.00  | Deep plantar blood vessel injury                             |
| 15 | 33854 SD81z00  | Superficial injury of cornea NOS                             |
| 16 | 45180 S420600  | Closed traumatic dislocation superior radio-ulnar joint      |
| 17 | 5586 SE23.00   | Contusion, back                                              |
| 18 |                |                                                              |
| 19 | 33706 S331000  | Open fracture of the proximal tibia                          |
| 20 | 46151 S77C.00  | Injury of multiple pelvic organs                             |
| 21 | 33908 S27..00  | Multiple fractures of hand bones                             |
| 22 | 68085 S241000  | Open fracture of carpal bone, unspecified                    |
| 23 | 93679 S4J0300  | Closed #-dislocation sterno-clavicular joint, posterior      |
| 24 |                |                                                              |
| 25 | 27287 S02x000  | Fracture of alveolus, closed                                 |
| 26 | 33990 S271.00  | Open multiple fractures of hand bones                        |
| 27 | 103210 SH24100 | Deep full thickness burn of breast without loss of body part |
| 28 | 9475 SH1..00   | Burn of the face, head or neck                               |
| 29 |                |                                                              |
| 30 | 19134 SB43.00  | Saphenous vein injury                                        |
| 31 | 41548 S100400  | Closed fracture of fourth cervical vertebra                  |
| 32 | 48759 SD20100  | Abrasion, scapular area                                      |
| 33 | 16031 S770000  | Closed injury of bladder                                     |
| 34 | 50897 SJ16000  | Closed injury, accessory nerve                               |
| 35 | 56525 S346000  | Closed fracture ankle, trimalleolar, low fibular fracture    |
| 36 |                |                                                              |
| 37 | 103524 S4C2200 | Closed fracture-subluxation mid carpal                       |
| 38 | 23821 SK1D.00  | Injury of muscle and tendon at hip and thigh level           |
| 39 | 45374 S260x00  | Closed fractures of phalanx or phalanges, multiple sites     |
| 40 | 31553 SB00300  | Internal carotid artery injury                               |
| 41 | 28376 SH41700  | Superficial burn of the wrist                                |
| 42 | 34334 S933.00  | Degloving injury, finger                                     |
| 43 |                |                                                              |
| 44 | 55687 S211100  | Open fracture scapula, acromion                              |
| 45 | 17462 SF01.00  | Crush injury, scalp                                          |
| 46 | 62832 SJ50000  | Closed injury, axillary nerve                                |
| 47 |                |                                                              |
| 48 | 45826 SH74000  | Burn of the vagina                                           |
| 49 | 45488 SE32400  | Contusion wrist, volar                                       |
| 50 | 28209 S911000  | Open wound of forearm with complication                      |
| 51 | 69470 SF30400  | Closed crush injury, hip                                     |
| 52 | 59333 S491500  | Open dislocation C4/C5                                       |
| 53 |                |                                                              |
| 54 | 10737 82...11  | Closed reduction of fracture                                 |
| 55 | 11493 SD31.00  | Abrasion or friction burn of lower arm, infected             |
| 56 | 40373 SF31000  | Crush injury, lower leg                                      |
| 57 | 67988 TN05.00  | Injury ?accidental, poisoning by drug or medicament NOS      |
| 58 | 61675 S235900  | Open volar Barton's fracture                                 |
| 59 | 60222 SJ31000  | Thoracic nerve root injury - T1                              |
| 60 | 34166 S10z.00  | Fracture of spine without mention of spinal cord lesion NOS  |



|    |               |                                                             |
|----|---------------|-------------------------------------------------------------|
| 1  |               |                                                             |
| 2  | 40697 SH6z.00 | Burn of multiple specified sites NOS                        |
| 3  | 21473 SD80.00 | Superficial injury of eyelids and periocular area           |
| 4  | 4883 SE0z.00  | Contusion of face, scalp and neck NOS                       |
| 5  | 56120 ZRM..11 | ISS - Injury severity score                                 |
| 6  | 59932 S410y00 | Other closed traumatic dislocation of shoulder              |
| 7  | 37013 TG81100 | Accidental burning caused by ammonia                        |
| 8  | 93039 TN2..00 | Injury ?accidental, poisoning by other gases                |
| 9  | 29766 S80..00 | Open wound of ocular adnexa                                 |
| 10 | 56384 S120300 | Closed fracture of three ribs                               |
| 11 | 67641 SC00.00 | Late effect of fracture of skull and face bones             |
| 12 | 36291 S832z00 | Open wound of nose NOS                                      |
| 13 | 35066 SA12.11 | Open wound of leg with tendon injury                        |
| 14 | 2127 S836400  | Open wound of tongue                                        |
| 15 | 68940 S025z00 | Fracture of malar or maxillary bones, open, NOS             |
| 16 | 27632 S643.00 | Diffuse brain injury                                        |
| 17 | 59341 S022300 | Closed fracture of mandible, coronoid process               |
| 18 | 55483 SB23300 | Splenic vein injury                                         |
| 19 | 67584 S4C0200 | Closed fracture-dislocation mid carpal                      |
| 20 | 33749 S200.00 | Closed fracture of clavicle                                 |
| 21 | 53693 S251500 | Open fracture finger metacarpal head                        |
| 22 | 65728 SH23400 | Full thickness burn of the back (excluding buttock)         |
| 23 | 53582 S740y00 | Other liver laceration without open wound into cavity       |
| 24 | 2643 S25..11  | Hand fracture - metacarpal bone                             |
| 25 | 99162 SJ41200 | Splanchnic nerve injury                                     |
| 26 | 73447 S750z00 | Spleen injury without mention of open wound into cavity NOS |
| 27 | 27848 SJ61000 | Closed injury femoral nerve                                 |
| 28 | 56961 S12..00 | Fracture of rib(s), sternum, larynx and trachea             |
| 29 | 59278 SJ21.11 | Dorsal cord injury without spinal bone injury               |
| 30 | 56831 SC20z00 | Late effect of intracranial injury NOS                      |
| 31 | 37192 S021.11 | Open fracture nasal bone                                    |
| 32 | 69418 S130400 | Closed fracture acetabulum, floor                           |
| 33 | 52398 S260V00 | Closed fracture finger distal phalanx, mallet               |
| 34 | 60090 S441100 | Open traumatic dislocation metacarpophalangeal joint        |
| 35 | 94360 S311z00 | Open fracture of femur, shaft or unspecified part, NOS      |
| 36 | 16496 S76..00 | Injury to kidney                                            |
| 37 | 10676 S424.00 | Dislocation of radial head                                  |
| 38 | 91120 SJ1y100 | Glossopharyngeal (9th) nerve injury                         |
| 39 | 38472 7K1Ld00 | Primary arthroscopic reduction of fracture                  |
| 40 | 43786 S11..12 | Fracture of vertebra with spinal cord lesion                |
| 41 | 54299 S100K00 | Closed fracture cervical vertebra, spinous process          |
| 42 | 71512 SC2..00 | Late effect of nervous system injury                        |
| 43 | 5886 7K1L700  | Closed reduction of fracture of tibia and or fibula         |
| 44 | 95781 S497z00 | Open dislocation NOS                                        |
| 45 | 37087 S82v012 | Open wound of tympanic membrane without complication        |
| 46 | 57444 S116.00 | Closed fracture of sacrum with spinal cord lesion           |
| 47 | 34106 S311000 | Open fracture of femur, unspecified part                    |
| 48 | 25173 7J03000 | Reduction of fracture of nasoethmoid complex of bones       |
| 49 | 12791 S310011 | Thigh fracture NOS                                          |
| 50 | 94172 SH22x00 | Partial thickness burn of multiple sites of the trunk       |
| 51 | 56539 SB24100 | Renal artery injury                                         |

|    |                |                                                              |
|----|----------------|--------------------------------------------------------------|
| 1  |                |                                                              |
| 2  | 37281 SD7z100  | Superficial injury of toe NOS, infected                      |
| 3  | 45779 S300A00  | Closed fracture of femur, upper epiphysis                    |
| 4  | 49564 7J42000  | Open reduction of fracture of spine & excis facet of spine   |
| 5  | 68103 S73x300  | Pancreas tail injury without open wound into cavity          |
| 6  | 3408 S021.00   | Open fracture nose                                           |
| 7  |                |                                                              |
| 8  | 17765 SH51600  | Superficial burn of the thigh                                |
| 9  | 102013 S241z00 | Open fracture of carpal bone NOS                             |
| 10 | 51314 SH53100  | Full thickness burn of the toe(s)                            |
| 11 | 38867 SR2..00  | Dislocations, sprains & strains involv multiple body regions |
| 12 | 33679 S260G00  | Closed fracture finger proximal phalanx, neck                |
| 13 | 11470 SA1..00  | Open wound of knee, leg and ankle                            |
| 14 | 73713 SH44000  | Deep full thickness burn of hand unsp, no loss of body part  |
| 15 | 39991 7K6GD00  | Closed reduction of dislocation of foot                      |
| 16 | 12101 SD60000  | Abrasion, hip                                                |
| 17 |                |                                                              |
| 18 | 73981 S301.00  | Open fracture proximal femur, transcervical                  |
| 19 | 64872 S102300  | Closed fracture thoracic vertebra, spinous process           |
| 20 | 96120 S430200  | Closed traumatic dislocation radiocarpal joint               |
| 21 | 96984 S135000  | Open fracture of ilium, unspecified                          |
| 22 |                |                                                              |
| 23 | 8702 SD6..00   | Superficial injury of lower limb, excluding foot             |
| 24 | 64098 SF21z00  | Crush injury, elbow and forearm NOS                          |
| 25 | 57979 S240000  | Closed fracture of carpal bone, unspecified                  |
| 26 | 33929 S240z00  | Closed fracture of carpal bone NOS                           |
| 27 | 40833 SD21z00  | Abrasion or friction burn shoulder/upper arm, infected, NOS  |
| 28 | 64525 SH70300  | Burn of the pharynx                                          |
| 29 | 56927 S4G1.00  | Open fracture-dislocation, ankle joint                       |
| 30 | 28038 SE22000  | Contusion, anterior abdominal wall                           |
| 31 |                |                                                              |
| 32 | 8704 S23y300   | Open fracture of the radius and ulna                         |
| 33 | 73788 S114500  | Closed spinal fracture with cauda equina lesion              |
| 34 | 96659 S102200  | Closed fracture thoracic vertebra, spondylolysis             |
| 35 | 94457 SH81100  | Burn: 10-14% of body surface, 10-14% BS full thickness       |
| 36 | 47837 S240C00  | Closed fracture scaphoid, waist, oblique                     |
| 37 | 67443 S734200  | Transverse colon injury without open wound into cavity       |
| 38 | 101517 S118z00 | Closed fracture of coccyx with spinal cord lesion NOS        |
| 39 | 54471 SF32.00  | Crush injury, ankle and foot, excluding toe(s)               |
| 40 | 29003 SH43200  | Full thickness burn of the thumb                             |
| 41 | 28124 SA2z.00  | Open wound of foot NOS                                       |
| 42 | 70604 S221600  | Open fracture proximal humerus, three part                   |
| 43 | 22512 SJ59.00  | Long thoracic nerve injury                                   |
| 44 | 99549 S023200  | Open fracture of mandible, subcondylar                       |
| 45 | 56311 S241500  | Open fracture trapezium                                      |
| 46 |                |                                                              |
| 47 | 2672 S36..00   | Fracture of one or more phalanges of foot                    |
| 48 | 49357 TG80200  | Accidental burning or scalding caused by liquid metal        |
| 49 | 36460 S49z.00  | Other dislocation NOS                                        |
| 50 | 65300 S101600  | Open fracture of sixth cervical vertebra                     |
| 51 | 110570 S411500 | Open traumatic dislocation scapula                           |
| 52 | 28604 S362000  | Closed fracture of great toe                                 |
| 53 | 23780 S03z.11  | Depressed skull fracture NOS                                 |
| 54 | 110247 7J42J00 | Primary closed reduction spinal fracture alone               |
| 55 | 25485 S33z.00  | Fracture of tibia and fibula, NOS                            |
| 56 | 98867 S251A00  | Open fracture thumb metacarpal shaft                         |
| 57 |                |                                                              |
| 58 |                |                                                              |
| 59 |                |                                                              |
| 60 |                |                                                              |



|    |                |                                                              |
|----|----------------|--------------------------------------------------------------|
| 1  |                |                                                              |
| 2  | 110059 SJ33100 | Sacral nerve root injury - S2                                |
| 3  | 7672 7K1D.00   | Primary open reduction fracture bone & intramedull fixation  |
| 4  | 51392 7J13100  | Open reduction of fracture of maxilla NEC                    |
| 5  | 38765 S34y.00  | Open fracture ankle, unspecified                             |
| 6  | 20589 S911200  | Open wound of wrist with complication                        |
| 7  | 24246 SK1x800  | Multiple open wounds of lower leg                            |
| 8  | 23741 SJW..00  | Injury of unspecified nerve at forearm level                 |
| 9  | 65731 S261900  | Open fracture thumb distal phalanx, base                     |
| 10 | 384 TC...11    | Fall - accidental                                            |
| 11 | 55201 S231z00  | Open fracture of forearm, upper end, NOS                     |
| 12 | 108484 S112000 | Cls spinal fracture with unspec thoracic cord lesion,T1-6    |
| 13 | 108839 SH88.00 | Burn involving 80-89% of body surface (BS)                   |
| 14 | 48874 S4D2.00  | Closed fracture-subluxation digit                            |
| 15 | 98165 7J42B00  | Primary other external stabilisation of spinal fracture      |
| 16 | 104624 S431200 | Open traumatic dislocation radiocarpal joint                 |
| 17 | 108551 S490211 | Closed dislocation of second cervical vertebra (C2)          |
| 18 | 109098 SJ2x.00 | Spinal cord injury multiple site without spinal bone injury  |
| 19 | 27492 S031.00  | Closed fracture of skull NOS with intracranial injury        |
| 20 | 933 PE30.00    | Congenital dislocation of hip                                |
| 21 | 93829 S491.12  | Open dislocation of neck                                     |
| 22 | 5918 SK1D000   | Injury of adductor muscle and tendon of thigh                |
| 23 | 108000 S135100 | Open fracture pelvis, ischium                                |
| 24 | 106875 S4H1600 | Open fracture-dislocation, IPJ, multiple toes                |
| 25 | 48625 S723100  | Open injury of oesophagus                                    |
| 26 | 38482 SF23200  | Closed crush injury, finger, multiple                        |
| 27 | 27718 S4A0100  | Closed fracture-dislocation acromio-clavicular joint         |
| 28 | 22403 SB44.00  | Popliteal blood vessel injury                                |
| 29 | 69319 7J13z00  | Reduction of fracture of maxilla NOS                         |
| 30 | 27719 S334.00  | Closed fracture distal tibia                                 |
| 31 | 61735 SJ41.00  | Other sympathetic nerve injury                               |
| 32 | 52340 S4H1.00  | Open fracture-dislocation, foot                              |
| 33 | 106511 S621z00 | Subarachnoid h'ge inj + open intracran wnd+concussion unspec |
| 34 | 44054 S491800  | Open dislocation C7/T1                                       |
| 35 | 5860 SD1y100   | Superficial injury chest wall NOS, without major open wound  |
| 36 | 59199 S481600  | Open traumatic dislocation toe, IPJ, single                  |
| 37 | 6248 7K1J.00   | Closed (or no) reduction of fracture and internal fixation   |
| 38 | 99932 S431100  | Open traumatic dislocation distal radio-ulnar joint          |
| 39 | 106490 S73y100 | Pancreas head injury with open wound into cavity             |
| 40 | 100701 S725000 | Closed injury of thoracic trachea                            |
| 41 | 44640 S900200  | Open wound of axillary region                                |
| 42 | 30707 S01..12  | Ethmoid sinus fracture                                       |
| 43 | 33985 S4D0300  | Closed fracture-dislocation, distal interphalangeal joint    |
| 44 | 93458 S622z00  | Subdural h'ge inj no open intracran wound+concussion unspec  |
| 45 | 10149 S23A.00  | Fracture of shafts of both ulna and radius                   |
| 46 | 106172 SJ51100 | Closed injury, median nerve, palmar sensory branch           |
| 47 | 106139 TN01300 | Injury ?accidental poisoning by Pentobarbitone               |
| 48 | 40976 S292000  | Closed multiple fractures of clavicle, scapula and humerus   |
| 49 | 35650 SB10.00  | Thoracic aorta injury                                        |
| 50 | 10475 7K6GH00  | Closed reduction of dislocation of jaw                       |
| 51 | 33937 SH32.00  | Partial thickness burn of the arm                            |

|    |                |                                                              |
|----|----------------|--------------------------------------------------------------|
| 1  |                |                                                              |
| 2  | 94593 S4J3000  | Open fracture-subluxation of sternum                         |
| 3  | 70488 S490z00  | Closed dislocation of cervical vertebra NOS                  |
| 4  | 66808 S345000  | Open fracture ankle, bimalleolar, low fibular fracture       |
| 5  | 6299 S263.00   | Fracture of other finger                                     |
| 6  | 67655 S465600  | Closed traumatic dislocation, head of fibula                 |
| 7  | 71933 S72x.00  | Multiple intrathoracic organ injury no open wound to cavity  |
| 8  | 15558 S601.00  | Concussion with less than 1 hour loss of consciousness       |
| 9  | 51213 S361200  | Open fracture distal phalanx, toe                            |
| 10 | 34340 SJ10.00  | Oculomotor (3rd) nerve injury                                |
| 11 | 48961 S223000  | Open fracture of humerus NOS                                 |
| 12 | 30620 7K6GL00  | Closed reduction of dislocation of nasal septum              |
| 13 | 29493 SD71.00  | Abrasion or friction burn of foot and toe, infected          |
| 14 | 51937 SJ31800  | Thoracic nerve root injury - T9                              |
| 15 | 56596 SB23.00  | Portal and splenic vein injury                               |
| 16 | 40650 S4F6.00  | Closed fracture-subluxation, patello-femoral joint           |
| 17 | 105137 S011300 | Closed #skull bse + intracranial injury, 1-24hr loss consc   |
| 18 | 64303 SD20400  | Abrasion, clavicular area                                    |
| 19 | 42450 SD6z.00  | Superficial injury of lower limb, infected                   |
| 20 | 99058 SH54300  | Deep full thickness burn of ankle without loss of body part  |
| 21 | 96691 S235400  | Open fracture of ulna, lower epiphysis                       |
| 22 | 20598 7J43.00  | Fixation of fracture of spine                                |
| 23 | 66858 SH71z00  | Burn of the larynx, trachea or lung NOS                      |
| 24 | 71843 TKxz.00  | Suicide and selfinflicted injury by other means NOS          |
| 25 | 91485 N226K00  | Dislocation of tendon, wrist or hand                         |
| 26 | 28133 S10A000  | Fracture of first cervical vertebra                          |
| 27 | 20678 S333200  | Open fracture of tibia and fibula, shaft                     |
| 28 | 58688 S010000  | Closed #skull bse no intracranial injury, unspec state consc |
| 29 | 8860 SA23.00   | Degloving injury, foot                                       |
| 30 | 92188 S441z00  | Open traumatic dislocation of finger not otherwise specified |
| 31 | 1250 S224.11   | Elbow fracture - closed                                      |
| 32 | 12253 SE32000  | Contusion, hand, excluding finger                            |
| 33 | 57687 SD11500  | Abrasion of buttock, infected                                |
| 34 | 104356 S4B2100 | Closed fracture-subluxation superior radio-ulnar joint       |
| 35 | 109377 S110100 | Cls spinal fracture with complete cervcl cord lesion, C1-4   |
| 36 | 67718 S261L00  | Open fracture finger middle phalanx, base                    |
| 37 | 104106 SK12500 | Injury of muscle of rotator cuff of shoulder                 |
| 38 | 96644 S303011  | Open fracture of femur, greater trochanter                   |
| 39 | 104015 S4D2600 | Closed fracture-subluxation multiple digits                  |
| 40 | 39393 SK12z00  | Other shoulder and upper arm injury NOS                      |
| 41 | 68354 SB00z00  | Carotid artery injury NOS                                    |
| 42 | 51364 S232000  | Closed fracture of radius, shaft, unspecified                |
| 43 | 59046 SJ31900  | Thoracic nerve root injury - T10                             |
| 44 | 54780 S23y.00  | Open fracture of radius and ulna, unspecified part           |
| 45 | 30092 SJ33000  | Sacral nerve root injury - S1                                |
| 46 | 61380 SK1x200  | Multiple open wounds of neck                                 |
| 47 | 102751 SyuA400 | [X]Multiple dislocations, sprains and strains, unspecified   |
| 48 | 37479 SE23000  | Contusion, interscapular region                              |
| 49 | 36255 TK6..00  | Suicide and selfinflicted injury by cutting and stabbing     |
| 50 | 16826 SB2..00  | Injury to abdominal and pelvic blood vessels                 |
| 51 | 4452 N083.00   | Recurrent dislocation of joint                               |

|    |                |                                                             |
|----|----------------|-------------------------------------------------------------|
| 1  |                |                                                             |
| 2  | 102775 SJ21z00 | Thoracic cord injury without spinal bone injury, NOS        |
| 3  | 104898 SA03000 | Degloving injury, hip                                       |
| 4  | 25654 7K6F.00  | Primary open reduction of traumatic dislocation of joint    |
| 5  | 62728 S760000  | Kidney injury without open wound into cavity, unspecified   |
| 6  | 28325 SH0..12  | Corneal burns                                               |
| 7  | 72101 S494z00  | Closed dislocation of spine NOS                             |
| 8  | 57592 S210z00  | Closed fracture of scapula NOS                              |
| 9  | 59419 S833200  | Open wound of nasal cavity with complication                |
| 10 | 102254 7K1Y.00 | Second closed reduction fracture bone and internal fixation |
| 11 | 105238 K04..13 | Acute kidney injury                                         |
| 12 | 10843 TN60.00  | Injury ?accidental, by cutting instrument                   |
| 13 | 60260 S023800  | Open fracture of mandible, body, other and unspecified      |
| 14 | 34454 SJ54.00  | Musculocutaneous nerve injury                               |
| 15 | 71411 SH33000  | Full thickness burn of the arm, unspecified                 |
| 16 | 66298 S840000  | Open wound of larynx and trachea, unspecified               |
| 17 | 54149 S4B1000  | Open fracture-dislocation elbow joint                       |
| 18 | 9736 S01..15   | Occiput bone fracture                                       |
| 19 | 61631 S431400  | Open traumatic dislocation CMCJ                             |
| 20 | 18453 S49x.13  | Hand dislocation NOS                                        |
| 21 | 35312 S02yz00  | Fracture of other facial bones,open, NOS                    |
| 22 | 101914 S82v300 | Open wound of cochlea                                       |
| 23 | 71722 S852.00  | Open wound of front wall of thorax                          |
| 24 | 23753 TK7..00  | Suicide and selfinflicted injury by jumping from high place |
| 25 | 9165 S234300   | Closed fracture of ulna, styloid process                    |
| 26 | 55189 SF32z00  | Crush injury, ankle and foot NOS                            |
| 27 | 25768 SD5z.00  | Superficial injury of finger NOS, infected                  |
| 28 | 24804 SF10211  | Crush injury of labia                                       |
| 29 | 34355 7K1JK00  | Primary closed reduction of fracture and wire fixation      |
| 30 | 27431 SH20600  | Unspecified thickness burn of the genitalia                 |
| 31 | 6998 SE23100   | Contusion, buttock                                          |
| 32 | 38296 SA4..00  | Multiple and unspecified open wound of lower limb           |
| 33 | 101909 S495100 | Open dislocation of coccyx                                  |
| 34 | 101488 SF20900 | Open crush injury, shoulder area                            |
| 35 | 34634 7J42100  | Open reduction of fracture of spine NEC                     |
| 36 | 63049 S4D0600  | Closed fracture-dislocation multiple digits                 |
| 37 | 7485 SD61.00   | Abrasion or friction burn of lower limb, infected           |
| 38 | 47842 S000.00  | Closed fracture vault of skull without intracranial injury  |
| 39 | 101241 SB16.00 | Pulmonary blood vessel injury                               |
| 40 | 19058 S234D00  | Closed fracture distal radius, extra-articular, other type  |
| 41 | 44790 S232200  | Closed fracture of the ulnar shaft                          |
| 42 | 66544 S4D3100  | Open fracture-subluxation, metacarpophalangeal joint        |
| 43 | 94416 S261500  | Open fracture thumb proximal phalanx, shaft                 |
| 44 | 100875 S61x600 | Brain cont no open intracranial wound + LOC unspec duration |
| 45 | 29673 S82v.00  | Other open wound of ear                                     |
| 46 | 18958 SH21200  | Superficial burn of the chest wall                          |
| 47 | 100771 S301311 | Open fracture base of neck of femur                         |
| 48 | 97736 S497700  | Open traumatic dislocation costo-chondral joint             |
| 49 | 68731 SH13200  | Full thickness burn of the eye                              |
| 50 | 100640 S33B.00 | Open fracture of distal tibia and fibula                    |
| 51 | 44885 SB2y100  | Ovarian vein injury                                         |

|    |                |                                                             |
|----|----------------|-------------------------------------------------------------|
| 1  |                |                                                             |
| 2  | 22301 PE8y200  | Congenital dislocation of elbow                             |
| 3  | 33903 S37..00  | Fracture of lower limb, level unspecified                   |
| 4  | 2176 S362.00   | Fracture of great toe                                       |
| 5  | 95716 S836x00  | Multiple open mouth wounds                                  |
| 6  | 28550 S330000  | Closed fracture of the proximal tibia                       |
| 7  | 4838 SE1z.00   | Contusion, eye NOS                                          |
| 8  | 39355 SJ23.00  | Sacral cord injury without bony injury                      |
| 9  | 31982 S820000  | Open wound of external ear, unspecified                     |
| 10 | 68436 S894.00  | Open wound of lateral abdominal wall                        |
| 11 | 104726 S003400 | Open #skull vlt + intracranial injury, >24hr LOC + recovery |
| 12 | 34367 S23y100  | Open fracture of radius (alone), unspecified                |
| 13 | 34158 S420.00  | Closed traumatic dislocation elbow joint                    |
| 14 | 96734 S481700  | Open traumatic dislocation, metatarso-phalangeal jnt, multi |
| 15 | 8439 SD41.00   | Abrasion or friction burn of hand, infected                 |
| 16 | 41154 S776.00  | Injury of ureter                                            |
| 17 | 65195 SH41.11  | Erythema of wrist and hand, first degree burn               |
| 18 | 28954 S312.00  | Closed fracture distal femur                                |
| 19 | 36282 SD4z.00  | Superficial injury of hand NOS, infected                    |
| 20 | 51916 SH14900  | Deep full thickness burn of neck without loss of body part  |
| 21 | 73759 S821z00  | Open wound of external ear with complication, NOS           |
| 22 | 97891 TN52.00  | Injury ?accidental, by hunting rifle                        |
| 23 | 47828 S347000  | Open fracture ankle, trimalleolar, low fibular fracture     |
| 24 | 3373 S834400   | Open wound of lip                                           |
| 25 | 60560 S901300  | Open wound of upper arm with complication                   |
| 26 | 27517 SE22200  | Contusion, groin                                            |
| 27 | 99895 S12y.00  | Fracture of other parts of bony thorax                      |
| 28 | 99127 SH85z00  | Burn: 50-59% of body surface NOS                            |
| 29 | 18360 S410.00  | Closed traumatic dislocation of shoulder                    |
| 30 | 7393 7K15.00   | Other surgical fracture of bone                             |
| 31 | 835 S10B200    | Fracture of coccyx                                          |
| 32 | 66322 S150100  | Open multiple fracture of thoracic spine                    |
| 33 | 48959 SA11.00  | Open wound of knee, leg and ankle with complication         |
| 34 | 61653 7K6GX00  | Primary closed reduction of fracture dislocation alone      |
| 35 | 97211 S353500  | Open fracture intermediate cuneiform                        |
| 36 | 35337 SC...00  | Late effects injury/poisoning/toxic effects/external causes |
| 37 | 27615 SF23300  | Open crush injury, finger                                   |
| 38 | 61998 S440600  | Closed traumatic dislocation multiple digits                |
| 39 | 48337 S302012  | Closed fracture of femur, lesser trochanter                 |
| 40 | 2490 S93..13   | Open wound of thumb                                         |
| 41 | 72499 SH24500  | Deep full thickness burn of buttock, no loss of body part   |
| 42 | 18430 SC13.00  | Late effect of contusion                                    |
| 43 | 60669 S4F5.00  | Open fracture-dislocation, patello-femoral joint            |
| 44 | 56980 SB22100  | Gastric artery injury                                       |
| 45 | 31354 S480200  | Closed traumatic dislocation, midtarsal joint               |
| 46 | 99383 SH87.00  | Burn involving 70-79% of body surface (BS)                  |
| 47 | 86803 S225400  | Open fracture of distal humerus, condyle(s) unspecified     |
| 48 | 45527 S130z00  | Closed fracture acetabulum NOS                              |
| 49 | 51420 S480300  | Closed traumatic dislocation, tarso-metatarsal joint        |
| 50 | 61286 SH73300  | Burn of the rectum                                          |
| 51 | 31326 S47z.00  | Dislocation of ankle NOS                                    |

|    |                |                                                             |
|----|----------------|-------------------------------------------------------------|
| 1  |                |                                                             |
| 2  | 63712 S4C2600  | Closed fracture-subluxation peri-lunate trans-scaphoid      |
| 3  | 30561 SH11800  | Superficial burn of the cheek                               |
| 4  | 33721 SJ20z00  | Cervical cord injury without spinal bone injury NOS         |
| 5  | 37575 SH10700  | Unspecified thickness burn of the forehead                  |
| 6  |                |                                                             |
| 7  | 22427 S430012  | Dislocation of radius - distal                              |
| 8  | 99140 SH55300  | Deep full thickness burn of ankle, with loss of body part   |
| 9  | 18239 SJ30500  | Cervical nerve root injury - C6                             |
| 10 | 69297 TN6z.00  | Injury ?accidental, by cutting or stabbing instrument NOS   |
| 11 | 99080 S735.00  | Colon or rectum injury with open wound into cavity          |
| 12 |                |                                                             |
| 13 | 9719 SJ52.00   | Ulnar nerve injury                                          |
| 14 | 93426 SH13700  | Full thickness burn of the forehead                         |
| 15 | 33705 SJ56400  | Open injury, digital nerve in finger                        |
| 16 | 417 S020.00    | Closed fracture nose                                        |
| 17 | 56576 SJ32100  | Lumbar nerve root injury - L2                               |
| 18 |                |                                                             |
| 19 | 99018 S001100  | Closed #skull vlt + intracranial injury, no loss of consc   |
| 20 | 21942 7K1Gy11  | Primary open reduction of bone fracture & external fixation |
| 21 | 72412 S001400  | Closed #skull vlt + intracranial injury, >24hr LOC+recovery |
| 22 | 94265 S4D1200  | Open fracture-dislocation IPJ, unspecified                  |
| 23 | 53632 SD6z300  | Superficial injury of lower leg NOS, infected               |
| 24 |                |                                                             |
| 25 | 40378 S910300  | Open wound of wrist, volar                                  |
| 26 | 99325 S225x00  | Open fracture of distal humerus, multiple                   |
| 27 | 29913 SH42100  | Superficial partial thickness burn of a single finger       |
| 28 | 107041 S043.00 | Mult #skull/face + other bones, open + intracranial injury  |
| 29 | 53859 SD70z00  | Abrasion of foot and toe, without mention of infection, NOS |
| 30 |                |                                                             |
| 31 | 66539 7K6FF00  | Primary open reduction of # dislocation+cast immobilisation |
| 32 | 24797 SF00.00  | Crush injury, face                                          |
| 33 | 57067 S820200  | Open wound of auditory canal                                |
| 34 | 5139 SE42100   | Contusion, ankle                                            |
| 35 | 801 S430400    | Closed traumatic dislocation carpometacarpal joint          |
| 36 |                |                                                             |
| 37 | 98096 SB34100  | Open injury, palmar artery                                  |
| 38 | 46171 7J42700  | Primary collar stabilisation of spinal fracture             |
| 39 | 35864 SJ70.12  | Neck superficial nerve injury                               |
| 40 | 99584 SB24z00  | Renal blood vessel injury NOS                               |
| 41 | 100009 SJ90.00 | Concussion and oedema of thoracic spinal cord               |
| 42 |                |                                                             |
| 43 | 97864 SF31400  | Open crush injury, lower leg                                |
| 44 | 15460 SD70000  | Abrasion, foot                                              |
| 45 | 39961 SH42000  | Superficial partial thickness burn of hand, unspecified     |
| 46 | 71211 SF21400  | Open crush injury, forearm                                  |
| 47 |                |                                                             |
| 48 | 64414 S880000  | Degloving injury penis                                      |
| 49 | 19202 SRz..00  | Injury involving multiple body regions NOS                  |
| 50 | 97772 S73A.00  | Injury of anus                                              |
| 51 | 29716 SF30100  | Crush injury, hip                                           |
| 52 | 66605 S480100  | Closed traumatic tarsal dislocation, unspecified            |
| 53 |                |                                                             |
| 54 | 16829 SD10200  | Abrasion, breast                                            |
| 55 | 41252 S77B.00  | Injury of uterus                                            |
| 56 | 97656 S72..00  | Other and unspecified intrathoracic organ injury            |
| 57 | 21334 7K6G900  | Closed reduction of dislocation of hip                      |
| 58 | 38895 S132y00  | Other specified closed fracture pubis                       |
| 59 | 57922 SF22900  | Open crush injury hand, palm                                |
| 60 | 28426 S332100  | Closed fracture shaft of fibula                             |



|    |                |                                                             |
|----|----------------|-------------------------------------------------------------|
| 1  |                |                                                             |
| 2  | 29889 SE32300  | Contusion hand, dorsum                                      |
| 3  | 71846 SF00z00  | Crush injury, face NOS                                      |
| 4  | 58720 S4E1.00  | Open fracture-dislocation, hip joint                        |
| 5  | 97354 S107100  | Open vertical fracture of sacrum                            |
| 6  |                |                                                             |
| 7  | 68595 S4C2300  | Closed fracture-subluxation, carpometacarpal joint          |
| 8  | 31474 SH52500  | Superficial partial thickness burn of the knee              |
| 9  | 16389 S210100  | Closed fracture scapula, acromion                           |
| 10 | 6731 S349.00   | Fracture of lateral malleolus                               |
| 11 | 69654 SD2z300  | Superficial injury of upper arm NOS, infected               |
| 12 |                |                                                             |
| 13 | 11254 SE31100  | Contusion, elbow area                                       |
| 14 | 18962 7K1L500  | Closed reduction of fracture of femur                       |
| 15 | 48076 SB25300  | Iliac artery injury                                         |
| 16 | 54221 SA11200  | Open wound of ankle with complication                       |
| 17 | 9346 SD3y100   | Superficial injury of forearm NOS                           |
| 18 |                |                                                             |
| 19 | 52724 SH52400  | Superficial partial thickness burn of the lower leg         |
| 20 | 72735 SJ34200  | Closed injury, brachial plexus, all roots (complete)        |
| 21 | 41893 SH31000  | Superficial burn of the arm, unspecified                    |
| 22 | 96643 S126100  | Open fracture of hyoid bone                                 |
| 23 | 56309 SD10z00  | Abrasion/friction burn of trunk, without infection NOS      |
| 24 | 63983 TN07.00  | Injury ?accidental, poisoning by agricultural chemicals     |
| 25 |                |                                                             |
| 26 | 40313 SH43700  | Full thickness burn of the wrist                            |
| 27 | 65361 SJB3.00  | Injury/multiple blood vessels at shoulder+upper arm level   |
| 28 | 96716 S781.00  | Open injury other intra-abdominal structure                 |
| 29 | 8915 S293.00   | Multiple fractures of forearm                               |
| 30 |                |                                                             |
| 31 | 65647 S645000  | Intracranial injury with prolonged coma without open wound  |
| 32 | 27497 SD80z00  | Superficial injury of eyelids and periocular area NOS       |
| 33 | 25026 SB36000  | Injury of vein at forearm level                             |
| 34 | 62562 S131y00  | Other specified open fracture acetabulum                    |
| 35 | 24611 7K6F200  | Primary open reduction of fracture dislocation of joint NEC |
| 36 | 63191 TG80500  | Accidental burning/scalding by boiling water from saucepan  |
| 37 |                |                                                             |
| 38 | 40888 TN50.00  | Injury ?accidental, by handgun                              |
| 39 | 54915 SC07.00  | Late effect of sprain without mention of tendon injury      |
| 40 | 49847 S352600  | Closed fracture lateral cuneiform                           |
| 41 | 41819 SD40000  | Abrasion hand, palm                                         |
| 42 |                |                                                             |
| 43 | 97791 S780300  | Peritoneum injury without mention of open wound into cavity |
| 44 | 57061 SE32500  | Contusion wrist, dorsum                                     |
| 45 | 60754 S46C.00  | Injury to multiple structures of knee                       |
| 46 | 96473 S117.00  | Open fracture of sacrum with spinal cord lesion             |
| 47 |                |                                                             |
| 48 | 38492 SH12611  | Scalp - 2nd degree burn                                     |
| 49 | 7034 7K1LE00   | Closed reduction of fracture of elbow                       |
| 50 | 26133 S430500  | Closed traumatic dislocation proximal metacarpal            |
| 51 | 56886 S240y00  | Closed fracture of other carpal bone                        |
| 52 | 96434 SJ6z.00  | Pelvic girdle and lower limb nerve injury NOS               |
| 53 |                |                                                             |
| 54 | 29162 S3zz.00  | Fracture of bones NOS                                       |
| 55 | 12441 S834600  | Open wound of chin                                          |
| 56 | 53036 SD0yz00  | Superficial injury of face/neck/scalp, no infection, NOS    |
| 57 | 104738 S02y200 | Fracture of palate, open                                    |
| 58 | 69261 S832x00  | Multiple wounds of nose                                     |
| 59 | 7606 TN82.00   | Injury ?accidental, by scald                                |
| 60 | 11825 SK1..00  | Other specified injury                                      |



|    |                |                                                              |
|----|----------------|--------------------------------------------------------------|
| 1  |                |                                                              |
| 2  | 24065 SJ5..00  | Shoulder girdle and upper limb peripheral nerve injury       |
| 3  | 28524 S102100  | Closed fracture thoracic vertebra, wedge                     |
| 4  | 65028 S4H2100  | Closed fracture-subluxation, midtarsal joint                 |
| 5  | 15800 7J03.00  | Reduction of fracture of facial bone                         |
| 6  | 96956 SD1zC00  | Superficial injury of vulva NOS, infected                    |
| 7  | 95839 S12y000  | Closed fracture of other parts of bony thorax                |
| 8  | 35974 S481300  | Open traumatic dislocation, tarso-metatarsal joint           |
| 9  | 9926 SE04.00   | Contusion, gum                                               |
| 10 | 100361 S497600 | Open traumatic dislocation costo-vertebral joint             |
| 11 | 9202 SH9..00   | Burn - unspecified                                           |
| 12 | 28475 SD61400  | Abrasion of ankle, infected                                  |
| 13 | 95633 S294000  | Cl fractures involving multiple regions of both upper limbs  |
| 14 | 29313 SA1z.00  | Open wound of knee, leg and ankle NOS                        |
| 15 | 41555 S933000  | Degloving injury, finger unspecified                         |
| 16 | 95601 SB25.00  | Iliac blood vessel injury                                    |
| 17 | 62716 S022.11  | Fracture of inferior maxilla, closed                         |
| 18 | 6727 SF2..00   | Crush injury, upper limb                                     |
| 19 | 3898 S910200   | Open wound of wrist, unspecified                             |
| 20 | 6579 SD7y100   | Superficial injury of toe NOS                                |
| 21 | 806 S339.00    | Fracture of fibula alone                                     |
| 22 | 55106 SH53600  | Full thickness burn of the thigh                             |
| 23 | 66610 S73y500  | Appendix injury with open wound into cavity                  |
| 24 | 11938 SD20.00  | Abrasion/friction burn shoulder/upper arm without infection  |
| 25 | 94709 S860000  | Degloving injury back                                        |
| 26 | 48886 S102400  | Closed fracture thoracic vertebra, transverse process        |
| 27 | 51938 S333100  | Open fracture shaft of fibula                                |
| 28 | 55171 SJ31300  | Thoracic nerve root injury - T4                              |
| 29 | 12232 SD00200  | Abrasion, scalp                                              |
| 30 | 45192 SB34200  | Injury of superficial palmar arch                            |
| 31 | 73072 SH23000  | Full thickness burn of the trunk, unspecified                |
| 32 | 69475 S913000  | Degloving injury, forearm                                    |
| 33 | 31130 SD7z.00  | Superficial injury of foot and toe NOS, infected             |
| 34 | 7500 S262.00   | Fracture of thumb                                            |
| 35 | 25811 S250800  | Closed fracture of thumb metacarpal                          |
| 36 | 70503 S233200  | Open fracture of the ulnar shaft                             |
| 37 | 71894 S901000  | Open wound of shoulder region with complication              |
| 38 | 28234 S134400  | Closed fracture pelvis, anterior superior iliac spine        |
| 39 | 68021 SJ17.00  | Hypoglossal (12th) nerve injury                              |
| 40 | 99512 S604.00  | Concussion with >24 hrs loss of consc without full recovery  |
| 41 | 16886 S81..12  | Open wound of eye                                            |
| 42 | 37858 S410211  | Posterior dislocation of shoulder                            |
| 43 | 51741 SC01000  | Late effect of fracture of cervical vertebra                 |
| 44 | 33974 S341.00  | Open fracture ankle, medial malleolus                        |
| 45 | 48332 7K6Gb00  | Primary closed reduction # dislocation+fixation by wire(s)   |
| 46 | 103696 SJ22500 | Incomplete lumbar cord injury,unsp,without bony injury       |
| 47 | 31031 SH52.11  | Blister of leg, second degree burn                           |
| 48 | 40078 S125100  | Closed fracture of hyoid bone                                |
| 49 | 50524 S000200  | Closed #skull vlt no intracranial injury, <1hr loss of consc |
| 50 | 65542 S781300  | Peritoneum injury with open wound into cavity                |
| 51 | 104931 S023600 | Open fracture of mandible, symphysis of body                 |

|    |                |                                                              |
|----|----------------|--------------------------------------------------------------|
| 1  |                |                                                              |
| 2  | 94368 S774.00  | Closed injury of uterus                                      |
| 3  | 94365 SB44100  | Popliteal artery injury, unspecified                         |
| 4  | 10252 S1...00  | Fracture of neck and trunk                                   |
| 5  | 68514 S4H3400  | Open fracture-subluxation, IPJ, single toe                   |
| 6  | 94292 S100D00  | Closed fracture axis, transverse process                     |
| 7  | 68737 SA12100  | Open wound of lower leg with tendon involvement              |
| 8  | 35076 SJ6X.00  | Injury of unspecified nerve at hip and thigh level           |
| 9  | 8199 S264.00   | Multiple fractures of fingers                                |
| 10 | 43094 SH89.00  | Burn involving >90% of body surface (BS)                     |
| 11 | 38733 S330700  | Closed fracture tubercle, tibia                              |
| 12 | 94189 S115.00  | Open fracture of lumbar spine with spinal cord lesion        |
| 13 | 110419 SH45000 | Deep full thickness burn of hand unsp, with loss body part   |
| 14 | 95581 SB44z00  | Popliteal blood vessel injury NOS                            |
| 15 | 30072 SC08.00  | Late effect of tendon injury                                 |
| 16 | 34403 S10A100  | Fracture of second cervical vertebra                         |
| 17 | 100528 SB25400 | Iliac vein injury                                            |
| 18 | 52414 SH51z00  | Superficial burn of the leg NOS                              |
| 19 | 24135 S01..14  | Middle fossa fracture                                        |
| 20 | 55327 S312x00  | Closed fracture distal femur, comminuted/intra-articular     |
| 21 | 7428 7K1LG00   | Closed reduction of fracture of shoulder                     |
| 22 | 93497 N331N00  | Fragility fracture                                           |
| 23 | 60239 S023z00  | Fracture of mandible, open, NOS                              |
| 24 | 50356 SH30300  | Unspecified thickness burn of the upper arm                  |
| 25 | 56302 TG8yz00  | Accidental burning caused by hot object NOS                  |
| 26 | 40495 SH40400  | Unspecified thickness burn of the thumb and finger(s)        |
| 27 | 35913 S89..00  | Other open wounds of other sites, excluding limbs            |
| 28 | 35198 S4D0.00  | Closed fracture-dislocation digit                            |
| 29 | 61265 SH21z00  | Superficial burn of the trunk NOS                            |
| 30 | 24715 7K1K.00  | Closed (or no) reduction of fracture and external fixation   |
| 31 | 63292 S4C1600  | Open fracture-dislocation peri-lunate trans-scaphoid         |
| 32 | 93536 S353900  | Open fracture talus, neck                                    |
| 33 | 37291 S3x0.00  | Other, multiple and ill-defined closed fractures lower limb  |
| 34 | 10436 TN81.00  | Injury ?accidental, by burns or fire                         |
| 35 | 50782 SJ53400  | Injury of radial nerve at wrist and hand level               |
| 36 | 93374 S4E2.00  | Closed fracture-subluxation, hip joint                       |
| 37 | 93348 SH13x00  | Full thickness burn of multiple sites of face, head or neck  |
| 38 | 93208 TN80100  | Injury ?accidental, by lying before moving object            |
| 39 | 61668 SH22.11  | Blister of trunk, second degree burn                         |
| 40 | 51408 S74z.00  | Injury to liver, NOS                                         |
| 41 | 63982 S123.00  | Open fracture sternum                                        |
| 42 | 51685 TK31.00  | Suicide + selfinflicted injury by suffocation by plastic bag |
| 43 | 91555 SH62.00  | Partial thickness burn of multiple specified sites           |
| 44 | 9203 SF32100   | Crush injury, ankle                                          |
| 45 | 66754 S640z00  | Intracranial inj NOS no open intracran wnd+concussion unsp   |
| 46 | 100796 S012200 | Open #skull bse no intracranial injury, <1hr loss of consc   |
| 47 | 94661 S4C3300  | Open fracture-subluxation, carpometacarpal joint             |
| 48 | 42200 S4H0300  | Closed #-dislocation, metatarsophalangeal joint, single      |
| 49 | 67358 S100411  | C4 vertebra closed fracture without spinal cord lesion       |
| 50 | 58605 TK7z.00  | Suicide+selfinflicted injury-jump from high place NOS        |
| 51 | 71903 TN8z.00  | Injury ?accidental, by means NOS                             |

|    |                |                                                              |
|----|----------------|--------------------------------------------------------------|
| 1  |                |                                                              |
| 2  | 4409 S10..12   | Fracture of vertebra without spinal cord lesion              |
| 3  | 92296 SH62000  | Superficial partial thickness burn multiple specified sites  |
| 4  | 15260 SH40300  | Unspecified thickness burn of more than one finger           |
| 5  | 66371 TN70.00  | Injury ?accidental, fall from residential premises           |
| 6  | 60110 7K6F900  | Primary open reduction of dislocation and skin traction      |
| 7  | 91823 SF11.00  | Crush injury, other trunk sites                              |
| 8  |                |                                                              |
| 9  | 105958 S466000 | Open traumatic dislocation of knee, unspecified              |
| 10 | 34954 S352400  | Closed fracture medial cuneiform                             |
| 11 | 38054 S30z.00  | Open fracture of neck of femur NOS                           |
| 12 | 91431 SB4W.00  | Injury of unspecified blood vessel at lower leg level        |
| 13 | 91261 SA41.00  | Multiple and unspec open wound of leg with complication      |
| 14 | 52780 S910z00  | Open wound of lower arm, NOS                                 |
| 15 | 55955 S023500  | Open fracture of mandible, angle of jaw                      |
| 16 | 96483 SF22300  | Closed crush injury wrist, volar                             |
| 17 | 44687 SF23500  | Open crush injury, finger, multiple                          |
| 18 | 37478 S48z.00  | Dislocation of foot NOS                                      |
| 19 | 99517 S741400  | Liver major laceration with open wound into cavity           |
| 20 | 73210 S301400  | Open fracture head, femur                                    |
| 21 | 65155 S4J0000  | Closed fracture-dislocation of sternum                       |
| 22 | 70673 S023000  | Open fracture mandible (site unspecified)                    |
| 23 | 89468 S491.13  | Open dislocation cervical vertebra                           |
| 24 | 89434 7P20100  | Delivery of rehabilitation for hip fracture                  |
| 25 | 16278 SD71z00  | Abrasion or friction burn of foot and toe, infected, NOS     |
| 26 | 34212 S4J2100  | Closed fracture-subluxation of pelvis                        |
| 27 | 51950 SH25500  | Deep full thickness burn of buttock, with loss of body part  |
| 28 | 53043 SJ51300  | Open injury, median nerve                                    |
| 29 | 12859 SD30200  | Abrasion wrist, volar                                        |
| 30 | 10589 SD71000  | Abrasion of foot, infected                                   |
| 31 | 18295 SE24100  | Contusion, penis                                             |
| 32 | 101906 TKx6.00 | Suicide and selfinflicted injury by crashing of aircraft     |
| 33 | 3410 S43..00   | Dislocation or subluxation of wrist                          |
| 34 | 71545 SH22000  | Superficial partial thickness burn unspecified part of trunk |
| 35 | 53593 S261B00  | Open fracture thumb distal phalanx, tuft                     |
| 36 | 86395 SJ31A00  | Thoracic nerve root injury - T11                             |
| 37 | 32298 S6z..00  | Intracranial injury, excluding those with skull fracture NOS |
| 38 | 21909 SD10900  | Abrasion, perineum                                           |
| 39 | 73193 SF1y.00  | Crush injury, trunk, multiple sites                          |
| 40 | 32012 7K1Le00  | Primary arthroscopic reduction and fixation of fracture      |
| 41 | 73956 S121700  | Open fracture of seven ribs                                  |
| 42 | 62877 TH0..00  | Late effects of accidental injury                            |
| 43 | 66431 SH56.00  | Burn and corrosion of hip and lower limb,except ankle & foot |
| 44 | 73812 7K1N900  | Primary skeletal traction of fracture                        |
| 45 | 30076 S2z..00  | Fracture of upper limb NOS                                   |
| 46 | 5766 SF32000   | Crush injury, foot                                           |
| 47 | 3090 SE42000   | Contusion, foot                                              |
| 48 | 38826 SD11200  | Abrasion of breast, infected                                 |
| 49 | 36742 SD6y300  | Superficial injury of lower leg NOS                          |
| 50 | 40590 S480700  | Cls traumatic dislocation, metatarso-phalangeal jnt,multiple |
| 51 | 23987 S234211  | Dupuytren's fracture, radius - closed                        |
| 52 | 102868 SB2y.00 | Other abdominal or pelvic blood vessel injury                |
| 53 |                |                                                              |
| 54 |                |                                                              |
| 55 |                |                                                              |
| 56 |                |                                                              |
| 57 |                |                                                              |
| 58 |                |                                                              |
| 59 |                |                                                              |
| 60 |                |                                                              |

|    |                |                                                              |
|----|----------------|--------------------------------------------------------------|
| 1  |                |                                                              |
| 2  | 73714 S740000  | Liver injury without open wound into cavity, unspecified     |
| 3  | 43705 SC12.00  | Late effect of superficial injury                            |
| 4  | 33692 S0z..00  | Fracture of skull NOS                                        |
| 5  | 38878 S301500  | Open fracture proximal femur,subcapital, Garden grade unspec |
| 6  | 96413 SF0z.00  | Crush injury, face, scalp and neck NOS                       |
| 7  |                |                                                              |
| 8  | 37394 SFz..00  | Crushing injury NOS                                          |
| 9  | 101173 SJ52700 | Open injury, ulnar nerve, deep motor                         |
| 10 | 57924 S350000  | Closed fracture calcaneus, extra-articular                   |
| 11 | 44567 TD17.00  | Accident due to fall from other burning structure/building   |
| 12 |                |                                                              |
| 13 | 72275 SB35.00  | Digital blood vessel injury                                  |
| 14 | 12783 S8W..00  | Injury of blood vessels of head, NEC                         |
| 15 | 73451 S013400  | Open #skull bse + intracranial injury, >24hr LOC + recovery  |
| 16 | 62140 SJ62.00  | Posterior tibial nerve injury                                |
| 17 | 28070 S4G3.00  | Open fracture-subluxation, ankle joint                       |
| 18 |                |                                                              |
| 19 | 34021 S332000  | Closed fracture shaft of tibia                               |
| 20 | 41730 S022200  | Closed fracture of mandible, subcondylar                     |
| 21 | 11313 S220100  | Closed fracture proximal humerus, neck                       |
| 22 | 42882 S480.00  | Closed traumatic dislocation of foot                         |
| 23 |                |                                                              |
| 24 | 73416 S110z00  | Closed fracture of cervical spine with cord lesion NOS       |
| 25 | 99303 SR14.00  | Fractures involving multiple regions of both lower limbs     |
| 26 | 51666 S241300  | Open fracture triquetral                                     |
| 27 | 67346 SH42A00  | Deep partial thickness burn of the thumb                     |
| 28 | 73332 S750y00  | Other spleen injury without mention of open wound to cavity  |
| 29 | 6734 7K14.00   | Open surgical fracture of bone                               |
| 30 |                |                                                              |
| 31 | 59802 SJ17.11  | Twelfth cranial nerve injury                                 |
| 32 | 59405 TKx0000  | Suicide + selfinflicted injury-jumping before moving object  |
| 33 | 51137 SD2yz00  | Superficial injury shoulder/upper arm, without infection NOS |
| 34 | 49641 SB24.00  | Renal blood vessel injury                                    |
| 35 | 45956 S011600  | Closed #skull bse + intracranial injury, LOC unspec duration |
| 36 | 14991 S800.00  | Eyelid skin and periocular area laceration                   |
| 37 |                |                                                              |
| 38 | 73208 S313x00  | Open fracture distal femur, comminuted/intra-articular       |
| 39 | 73206 S041.00  | Mult #skull/face+other bones, closed + intracranial injury   |
| 40 | 64172 SD11400  | Abrasion of back, infected                                   |
| 41 | 72586 S353B00  | Open fracture metatarsal base                                |
| 42 |                |                                                              |
| 43 | 1520 S60..00   | Concussion                                                   |
| 44 | 57736 S234A11  | Closed dorsal Barton's fracture-dislocation                  |
| 45 | 40393 S645.00  | Intracranial injury with prolonged coma                      |
| 46 | 48930 SH20z00  | Unspecified thickness burn of the trunk NOS                  |
| 47 |                |                                                              |
| 48 | 12233 SD50.00  | Abrasion/friction burn of finger, without infection          |
| 49 | 98267 S130600  | Closed fracture acetabulum, double column unspecified        |
| 50 | 7792 SD71100   | Abrasion of toe, infected                                    |
| 51 | 55930 7K6FE00  | Primary open reduction of fracture dislocation alone         |
| 52 | 63358 SH15100  | Deep full thickness burn of the ear, with loss of body part  |
| 53 | 33582 S260300  | Closed fracture thumb proximal phalanx                       |
| 54 |                |                                                              |
| 55 | 2662 S230300   | Closed Monteggia's fracture                                  |
| 56 | 72896 SB21z00  | Inferior vena cava injury NOS                                |
| 57 | 27527 SJ7x.00  | Other specified nerve injury                                 |
| 58 | 9239 PE3..00   | Congenital dislocation and subluxation of the hip            |
| 59 | 96696 SH82000  | Burn: 20-29% of body surface,<10%/unspec BS full thickness   |
| 60 | 98916 SH44500  | Deep full thickness burn of palm hand, no loss of body part  |

|    |                |                                                              |
|----|----------------|--------------------------------------------------------------|
| 1  |                |                                                              |
| 2  | 72692 SH51x00  | Superficial burn of multiple sites of the leg                |
| 3  | 53575 7J02300  | Repair of fracture of cranium NEC                            |
| 4  | 72617 S101x00  | Multiple open fractures of cervical vertebrae                |
| 5  | 63557 7K6GP00  | Primary closed reduction dislocation alone                   |
| 6  | 61987 SF31200  | Closed crush injury, lower leg                               |
| 7  |                |                                                              |
| 8  | 29084 S33y200  | Open fracture of tibia and fibula, unspecified part          |
| 9  | 6914 SD11800   | Abrasion of groin, infected                                  |
| 10 | 69688 SH44.14  | Deep third degree burn of wrist, without loss of a body part |
| 11 | 6706 SF2..11   | Crush injury of arm                                          |
| 12 |                |                                                              |
| 13 | 99505 S013200  | Open #skull bse + intracranial injury, <1hr loss of consc    |
| 14 | 100040 S201100 | Open fracture clavicle, medial end                           |
| 15 | 72450 SH42x00  | Partial thickness burn of multiple sites of the wrist/hand   |
| 16 | 50309 S4J0200  | Closed #-dislocation sterno-clavicular joint, anterior       |
| 17 | 98933 S241600  | Open fracture trapezoid                                      |
| 18 |                |                                                              |
| 19 | 3025 S3z2.00   | Stress fracture                                              |
| 20 | 23771 SE09.00  | Contusion, scalp                                             |
| 21 | 72324 S11..11  | Fracture of transverse process of spine + spinal cord lesion |
| 22 | 2470 S3z..00   | Fracture of unspecified bones                                |
| 23 |                |                                                              |
| 24 | 56248 SC01100  | Late effect of fracture of thoracic vertebra                 |
| 25 | 28233 S33y.00  | Open fracture of tibia and fibula, unspecified part, NOS     |
| 26 | 49267 S28..00  | Ill-defined fractures of upper limb                          |
| 27 | 57412 N082P00  | Other acquired pathological dislocation of the hip           |
| 28 | 7317 S344.00   | Closed fracture ankle, bimalleolar                           |
| 29 |                |                                                              |
| 30 | 67458 SH53000  | Full thickness burn of the leg, unspecified                  |
| 31 | 96453 S466z00  | Open dislocation of knee NOS                                 |
| 32 | 72126 S734.00  | Colon or rectum injury without open wound into cavity        |
| 33 | 42864 S232100  | Closed fracture of the radial shaft                          |
| 34 | 57246 S002.00  | Open fracture vault of skull without intracranial injury     |
| 35 | 28249 S260800  | Closed fracture thumb distal phalanx                         |
| 36 |                |                                                              |
| 37 | 45690 S4D1500  | Open fracture-dislocation, interphalangeal joint thumb       |
| 38 | 3224 S87..00   | Open wound of buttock                                        |
| 39 | 35530 7K1LK00  | Closed reduction of fracture of metacarpus                   |
| 40 | 67742 SB23400  | Cystic vein injury                                           |
| 41 |                |                                                              |
| 42 | 2328 S10B500   | Fracture of pubis                                            |
| 43 | 11342 7J12200  | Closed reduction of fracture of mandible NEC                 |
| 44 | 55591 SH33500  | Full thickness burn of the shoulder                          |
| 45 | 52699 S100311  | C3 vertebra closed fracture without spinal cord lesion       |
| 46 | 308 SK17200    | Other ankle injury                                           |
| 47 |                |                                                              |
| 48 | 24583 SDO..00  | Superficial injury to head, excluding eye                    |
| 49 | 62287 SB01.00  | Internal jugular vein injury                                 |
| 50 | 403 S64..13    | Head injury                                                  |
| 51 | 272 S40..00    | Dislocation or subluxation of jaw                            |
| 52 |                |                                                              |
| 53 | 62164 SB02.00  | Injury of vertebral artery                                   |
| 54 | 61487 S900x00  | Multiple open wounds of upper arm                            |
| 55 | 97386 S353A00  | Open fracture talus, body                                    |
| 56 | 40003 SB36.00  | Injury of blood vessels at forearm level                     |
| 57 | 8207 SF22000   | Crush injury, hand, excluding fingers                        |
| 58 | 40321 7K1G300  | Primary open reduction of fracture alone                     |
| 59 | 65715 S261A00  | Open fracture thumb distal phalanx, shaft                    |
| 60 | 54978 SJ31100  | Thoracic nerve root injury - T2                              |



|    |               |                                                             |
|----|---------------|-------------------------------------------------------------|
| 1  |               |                                                             |
| 2  | 43195 S934.00 | Degloving injury, thumb                                     |
| 3  | 36437 S430011 | Carpal dislocation NOS                                      |
| 4  | 59233 S02y.00 | Open fracture other facial bone                             |
| 5  | 93601 SH54600 | Deep full thickness burn of thigh without loss of body part |
| 6  | 53700 SH31200 | Superficial burn of the elbow                               |
| 7  | 38373 PE30100 | Bilateral congenital dislocation of hip                     |
| 8  | 53337 S100H00 | Closed fracture cervical vertebra, wedge                    |
| 9  | 24809 7K1La00 | Revision to skin traction of fracture                       |
| 10 | 67881 SF32300 | Closed crush injury, ankle                                  |
| 11 | 25073 S360000 | Closed fracture proximal phalanx, toe                       |
| 12 | 20071 S78..00 | Other intra-abdominal organ injury                          |
| 13 | 71132 S4H0100 | Closed fracture-dislocation, midtarsal joint                |
| 14 | 71116 SH83.00 | Burn involving 30-39% of body surface (BS)                  |
| 15 | 59157 S894111 | Open wound of flank without complication                    |
| 16 | 4389 SJ14.00  | Facial (7th) nerve injury                                   |
| 17 | 20515 S028100 | Fracture of orbital floor                                   |
| 18 | 40652 SF21200 | Closed crush injury, forearm                                |
| 19 | 59006 S022800 | Closed fracture of mandible, body, other and unspecified    |
| 20 | 92972 SB22200 | Hepatic artery injury                                       |
| 21 | 10618 SH40.12 | Unspecified degree burn of hand                             |
| 22 | 10736 7206100 | Open reduction of fracture of orbit                         |
| 23 | 38408 S4C0100 | Closed fracture-dislocation radiocarpal joint               |
| 24 | 41933 SJ32300 | Lumbar nerve root injury - L4                               |
| 25 | 59843 SH63.00 | Full thickness burn of multiple specified sites             |
| 26 | 57377 N338400 | Angular mal-union of fracture                               |
| 27 | 51447 S420400 | Closed traumatic dislocation elbow joint, lateral           |
| 28 | 94756 SJ64300 | Open injury lateral cutaneous nerve thigh                   |
| 29 | 71888 SB43100 | Lesser saphenous vein injury                                |
| 30 | 51038 S133100 | Open fracture pelvis, multiple pubic rami - stable          |
| 31 | 28155 SC01200 | Late effect of fracture of lumbar vertebra                  |
| 32 | 10462 S4D0500 | Closed fracture-dislocation, interphalangeal joint thumb    |
| 33 | 70865 S441500 | Open traumatic dislocation, interphalangeal joint,thumb     |
| 34 | 33662 SJ52800 | Injury of ulnar nerve at wrist and hand level               |
| 35 | 28371 S352F00 | Closed fracture metatarsal, multiple                        |
| 36 | 69499 TN7z.00 | Injury ?accidental, fall from high place NOS                |
| 37 | 70814 SJ31600 | Thoracic nerve root injury - T7                             |
| 38 | 41972 S834x00 | Multiple open wounds of face                                |
| 39 | 94108 S126300 | Open fracture of trachea                                    |
| 40 | 42844 S4C1.00 | Open fracture dislocation wrist                             |
| 41 | 29090 SE42z00 | Contusion, ankle and foot NOS                               |
| 42 | 36034 SB...00 | Injury to blood vessels                                     |
| 43 | 36267 TG80B00 | Accidental burning or scalding caused by fat                |
| 44 | 8434 SE03.00  | Contusion, lip                                              |
| 45 | 50254 S321400 | Open fracture patella, comminuted (stellate)                |
| 46 | 70623 SD01z00 | Abrasion or friction burn of head, infected, NOS            |
| 47 | 69312 S225300 | Open fracture distal humerus, medial condyle                |
| 48 | 94409 S610z00 | Cortex cont no open intracranial wnd + concussion unspec    |
| 49 | 40659 SF0..11 | Crush injury of head                                        |
| 50 | 36594 SE40z00 | Contusion, hip and thigh NOS                                |
| 51 | 70500 S722000 | Closed injury of bronchus                                   |



|    |                |                                                              |
|----|----------------|--------------------------------------------------------------|
| 1  |                |                                                              |
| 2  | 88737 S313z00  | Open fracture of distal femur not otherwise specified        |
| 3  | 38857 SH40.14  | Unspecified degree burn of wrist                             |
| 4  | 57192 SH30z00  | Unspecified thickness burn of the arm NOS                    |
| 5  | 17087 SE23300  | Contusion of coccyx                                          |
| 6  | 7004 S132000   | Closed fracture pelvis, single pubic ramus                   |
| 7  |                |                                                              |
| 8  | 71623 P334z00  | Total or subtotal congenital cataract NOS                    |
| 9  | 20848 SH31100  | Superficial burn of the forearm                              |
| 10 | 12462 S025100  | Open fracture zygoma                                         |
| 11 | 68815 SH44.00  | Deep full thickness burn of wrist/hand, no loss of body part |
| 12 | 31594 S820w00  | Other open wound of external ear                             |
| 13 | 49595 S313100  | Open fracture of femoral condyle, unspecified                |
| 14 | 65736 S496.00  | Other closed traumatic dislocation                           |
| 15 | 42464 TKy..00  | Late effects of selfinflicted injury                         |
| 16 | 3676 S410411   | Closed dislocation of acromioclavicular joint                |
| 17 |                |                                                              |
| 18 | 69643 SD3z000  | Superficial injury of elbow NOS, infected                    |
| 19 | 8040 S31..00   | Other fracture of femur                                      |
| 20 | 27782 S836700  | Dislocation of tooth                                         |
| 21 | 47501 TKx..00  | Suicide and selfinflicted injury by other means              |
| 22 | 35240 SH13600  | Full thickness burn of the scalp                             |
| 23 | 40587 S134500  | Closed fracture pelvis, anterior inferior iliac spine        |
| 24 | 52861 SD1z800  | Superficial injury of groin NOS, infected                    |
| 25 | 27661 S62..11  | Extradural haemorrhage following injury                      |
| 26 | 64862 7K1K000  | Closed reduction fracture bone and fixation to skeleton HFQ  |
| 27 | 64413 S450z00  | Closed traumatic dislocation of hip not otherwise specified  |
| 28 | 18589 SE40000  | Contusion, hip                                               |
| 29 | 16866 S225700  | Open fracture distal humerus, medial epicondyle              |
| 30 | 10417 S890.00  | Open wound of breast                                         |
| 31 | 15666 S240.00  | Closed fracture of carpal bone                               |
| 32 | 94844 S101A00  | Open fracture axis, odontoid process                         |
| 33 | 69917 S3x1.00  | Other, multiple and ill-defined open fractures of lower limb |
| 34 | 67294 S313400  | Open fracture distal femur, medial condyle                   |
| 35 | 10239 E2A2.00  | Post-concussion syndrome                                     |
| 36 | 8276 S350.00   | Closed fracture of calcaneus                                 |
| 37 | 8885 7K1LJ00   | Closed reduction of fracture of thumb                        |
| 38 | 100196 S353000 | Open fracture of tarsal bone, unspecified                    |
| 39 | 43701 N082Q00  | Pathological dislocation of knee joint                       |
| 40 | 15280 S75..00  | Injury to spleen                                             |
| 41 | 9209 SE33000   | Contusion, finger, unspecified                               |
| 42 | 27582 S91z.00  | Open wound of elbow, forearm and wrist NOS                   |
| 43 | 12327 SR20.00  | Dislocations, sprains and strains involving head with neck   |
| 44 | 66924 S481.00  | Open traumatic dislocation of foot                           |
| 45 | 69647 SD1zA00  | Superficial injury of penis NOS, infected                    |
| 46 | 59416 S83y.00  | Other open wound of head with complication                   |
| 47 | 38053 S100711  | C7 vertebra closed fracture without spinal cord lesion       |
| 48 | 64288 SH53z00  | Full thickness burn of the leg NOS                           |
| 49 | 69640 SD2z000  | Superficial injury of shoulder NOS, infected                 |
| 50 | 5260 S26..11   | Finger fracture                                              |
| 51 | 27815 N083100  | Recurrent joint dislocation, of the shoulder region          |
| 52 | 24674 S310100  | Closed fracture shaft of femur                               |
| 53 | 85998 SB23200  | Portal vein injury                                           |
| 54 |                |                                                              |
| 55 |                |                                                              |
| 56 |                |                                                              |
| 57 |                |                                                              |
| 58 |                |                                                              |
| 59 |                |                                                              |
| 60 |                |                                                              |

|    |                |                                                              |
|----|----------------|--------------------------------------------------------------|
| 1  |                |                                                              |
| 2  | 88761 7K6FP00  | Primary open reduction # dislocation+other jnt stabilisation |
| 3  | 68078 SK10700  | Closed injury of trachea                                     |
| 4  | 65488 SB47100  | Injury of greater saphenous vein at lower leg level          |
| 5  | 71159 TKx4.00  | Suicide and selfinflicted injury by electrocution            |
| 6  | 69449 SH12300  | Superficial partial thickness burn of the lip(s)             |
| 7  | 68763 S135300  | Open fracture pelvis, ischial tuberosity                     |
| 8  | 56665 SH42800  | Deep partial thickness burn of the hand, unspecified         |
| 9  | 6379 7K1LF00   | Closed reduction of fracture of humerus                      |
| 10 | 68811 7J41100  | Anterior decompression of fracture of spine                  |
| 11 | 41971 S33xz00  | Closed fracture of tibia and fibula, unspecified part, NOS   |
| 12 | 29664 S441300  | Open traumatic dislocation, distal interphalangeal joint     |
| 13 | 37875 S231A00  | Open fracture radius and ulna, proximal                      |
| 14 | 16985 S240A00  | Closed fracture scaphoid, proximal pole                      |
| 15 | 62018 SH32700  | Deep partial thickness burn of the arm, unspecified          |
| 16 | 101447 S133200 | Open fracture pelvis, multiple pubic rami - unstable         |
| 17 | 39733 S35z.00  | Fracture of tarsal and metatarsal bones NOS                  |
| 18 | 49295 SD1y500  | Superficial injury of buttock NOS, without major open wound  |
| 19 | 93798 SH12C00  | Deep partial thickness burn of the eye                       |
| 20 | 27496 SB3..00  | Injury to blood vessels of arm                               |
| 21 | 44630 SK1EX00  | Injury of unspecified muscle and tendon at lower leg level   |
| 22 | 54834 N331700  | Fracture of bone in neoplastic disease                       |
| 23 | 34359 SJ31B00  | Thoracic nerve root injury - T12                             |
| 24 | 28066 S20z.00  | Fracture of clavicle NOS                                     |
| 25 | 96451 SH13800  | Full thickness burn of the cheek                             |
| 26 | 97729 SJ18.00  | Contusion of infraorbital nerve                              |
| 27 | 33616 S260K00  | Closed fracture finger middle phalanx                        |
| 28 | 56582 SJ30700  | Cervical nerve root injury - C8                              |
| 29 | 46852 S523C00  | Volar plate injury, finger, distal interphalangeal joint     |
| 30 | 41551 SA10.00  | Open wound of knee, leg and ankle without complication       |
| 31 | 72957 TN8y.00  | Injury ?accidental, by other specified means                 |
| 32 | 60197 SC2z.00  | Late effect of nervous system injury NOS                     |
| 33 | 96715 S735000  | Colon injury with open wound into cavity, unspecified        |
| 34 | 50413 7K6H000  | Revision to open reduction # dislocation+skeletal traction   |
| 35 | 66312 S002100  | Open #skull vlt no intracranial injury, no loss of consc     |
| 36 | 95529 S114100  | Closed spinal fracture with complete lumbar cord lesion      |
| 37 | 5445 S100100   | Closed fracture atlas                                        |
| 38 | 68668 S301y00  | Open fracture proximal femur, other transcervical            |
| 39 | 38398 S235600  | Open fracture radius and ulna, distal                        |
| 40 | 6380 S235B00   | Open fracture radial styloid                                 |
| 41 | 68655 SB30200  | Closed injury, axillary vein                                 |
| 42 | 69602 SH32900  | Deep partial thickness burn of the elbow                     |
| 43 | 31708 S29..11  | Multiple fractures of arm                                    |
| 44 | 37450 S352800  | Closed fracture talus, head                                  |
| 45 | 68532 SJ1y200  | Vagus (10th) nerve injury                                    |
| 46 | 15764 S23x.00  | Closed fracture of radius and ulna, unspecified part         |
| 47 | 40254 SH52100  | Superficial partial thickness burn of the toe(s)             |
| 48 | 58001 S80..12  | Periocular open wound                                        |
| 49 | 33680 S223.00  | Open fracture of humerus, shaft or unspecified part          |
| 50 | 39407 SE2y.00  | Contusion, multiple sites of trunk                           |
| 51 | 33687 S4B0.00  | Closed fracture-dislocation elbow                            |

|    |                |                                                              |
|----|----------------|--------------------------------------------------------------|
| 1  |                |                                                              |
| 2  | 9072 S10B400   | Fracture of acetabulum                                       |
| 3  | 65109 S73x011  | Injury to pancreas - closed                                  |
| 4  | 15188 SE11.00  | Contusion, eyelids and periocular tissues                    |
| 5  | 5122 S9...11   | Laceration of arm                                            |
| 6  | 7144 SE43.11   | Toenail bruise                                               |
| 7  |                |                                                              |
| 8  | 37355 SE30000  | Contusion, shoulder area                                     |
| 9  | 36485 SE4y.00  | Contusion, multiple sites NEC                                |
| 10 | 55397 SJ63400  | Open injury superficial peroneal nerve                       |
| 11 | 6868 S310.00   | Closed fracture of femur, shaft or unspecified part          |
| 12 | 101669 S770.00 | Bladder and urethra injury without open wound into cavity    |
| 13 | 66164 S10y.00  | Open fracture of spine, unspecified,                         |
| 14 | 69737 S012.00  | Open fracture base skull without mention intracranial injury |
| 15 | 54825 S911100  | Open wound of elbow with complication                        |
| 16 | 68049 SJX..00  | Injury of unspecified nerve of thorax                        |
| 17 | 18843 S9z..00  | Open wound of upper limb NOS                                 |
| 18 | 48499 SD61100  | Abrasion of thigh, infected                                  |
| 19 | 52322 S330900  | Closed fracture fibula, neck                                 |
| 20 | 7340 S342.00   | Closed fracture ankle, lateral malleolus                     |
| 21 | 66063 TKxy.00  | Suicide and selfinflicted injury by other specified means    |
| 22 | 3748 S233.00   | Open fracture of radius and ulna, shaft                      |
| 23 | 67009 S740200  | Liver minor laceration without open wound into cavity        |
| 24 | 104728 SB21000 | Inferior vena cava injury, unspecified                       |
| 25 | 94242 TN11.00  | Injury ?accidental, poisoning by liquid petrol gas           |
| 26 | 71583 S022600  | Closed fracture of mandible, symphysis of body               |
| 27 | 73253 SD1y000  | Superficial injury interscapular rgn NOS, without mj opn wnd |
| 28 | 33515 S044.00  | Multiple fractures involving skull and facial bones          |
| 29 | 72209 PA16.00  | Dislocation of tongue                                        |
| 30 | 100893 SH23z00 | Full thickness burn of the trunk NOS                         |
| 31 | 10631 SD30000  | Abrasion, elbow area                                         |
| 32 | 67665 SA12000  | Open wound of knee with tendon involvement                   |
| 33 | 39302 S494211  | Closed dislocation of sacroiliac joint                       |
| 34 | 95006 S100E00  | Closed fracture axis, posterior arch                         |
| 35 | 38353 S220z00  | Closed fracture of proximal humerus not otherwise specified  |
| 36 | 21738 SC44.00  | Sequelae of burns, corrosions and frostbite                  |
| 37 | 23842 SH32100  | Superficial partial thickness burn of the forearm            |
| 38 | 31758 SH10.00  | Unspecified thickness burn of the face, head or neck         |
| 39 | 73790 S645100  | Intracranial injury with prolonged coma with open wound      |
| 40 | 19206 SR1..00  | Fractures involving multiple body regions                    |
| 41 | 60078 SJ03.00  | Visual cortex injury                                         |
| 42 | 44329 S320200  | Closed fracture patella, distal pole                         |
| 43 | 17152 SD10B12  | Abrasion or friction burn of scrotum without infection       |
| 44 | 48180 S760200  | Kidney laceration without mention of open wound into cavity  |
| 45 | 53585 S903100  | Degloving injury, scapular area                              |
| 46 | 61751 SB23000  | Superior mesenteric vein injury                              |
| 47 | 6969 SH2z.00   | Burn of the trunk NOS                                        |
| 48 | 71622 S4J2.00  | Other closed fracture-subluxation                            |
| 49 | 43882 ZLEO111  | Discharge from head injury rehabilitation                    |
| 50 | 24234 SH86.00  | Burn involving 60-69% of body surface (BS)                   |
| 51 | 17217 SF20300  | Crush injury, upper arm                                      |
| 52 | 50951 SH13100  | Full thickness burn of the ear                               |

|    |                |                                                             |
|----|----------------|-------------------------------------------------------------|
| 1  |                |                                                             |
| 2  | 27886 S222100  | Closed fracture of humerus, shaft                           |
| 3  | 38426 7K6FK00  | Primary open reduction of # dislocation+external fixation   |
| 4  | 6103 SD6y200   | Superficial injury of knee NOS                              |
| 5  | 47886 SH31300  | Superficial burn of the upper arm                           |
| 6  | 65532 S032z00  | Open #skull NOS no intracranial inj + concussion unspec     |
| 7  | 43091 S112600  | Cls spinal fracture with unspec thoracic cord lesion, T7-12 |
| 8  | 67003 7K6H300  | Secondary open reduction traumatic dislocation of joint NEC |
| 9  | 29137 S220700  | Closed fracture proximal humerus, four part                 |
| 10 | 66957 SJ45.00  | Iliohypogastric nerve injury                                |
| 11 | 48861 S7z..00  | Internal injury of chest, abdomen or pelvis NOS             |
| 12 | 21029 TK...00  | Suicide and selfinflicted injury                            |
| 13 | 97331 N083511  | Hip - recurrent dislocation                                 |
| 14 | 71814 SD1z200  | Superficial injury of breast NOS, infected                  |
| 15 | 67036 S4B2000  | Closed fracture-subluxation elbow joint                     |
| 16 | 105701 S61..12 | Cortex laceration and contusion                             |
| 17 | 34078 S300900  | Closed fracture proximal femur, subcapital, Garden grade IV |
| 18 | 17823 SF23000  | Closed crush injury, finger                                 |
| 19 | 48916 SH11300  | Superficial burn of the lip(s)                              |
| 20 | 99081 S733.00  | Small intestine injury with open wound into cavity          |
| 21 | 21773 S3x2.00  | Multiple fractures of femur                                 |
| 22 | 11570 Z6G1800  | Dislocation - traction                                      |
| 23 | 22574 SH70000  | Burn of the mouth, unspecified                              |
| 24 |                |                                                             |
| 25 |                |                                                             |
| 26 |                |                                                             |
| 27 |                |                                                             |
| 28 |                |                                                             |
| 29 |                |                                                             |
| 30 |                |                                                             |
| 31 |                |                                                             |
| 32 |                |                                                             |
| 33 |                |                                                             |
| 34 |                |                                                             |
| 35 |                |                                                             |
| 36 |                |                                                             |
| 37 |                |                                                             |
| 38 |                |                                                             |
| 39 |                |                                                             |
| 40 |                |                                                             |
| 41 |                |                                                             |
| 42 |                |                                                             |
| 43 |                |                                                             |
| 44 |                |                                                             |
| 45 |                |                                                             |
| 46 |                |                                                             |
| 47 |                |                                                             |
| 48 |                |                                                             |
| 49 |                |                                                             |
| 50 |                |                                                             |
| 51 |                |                                                             |
| 52 |                |                                                             |
| 53 |                |                                                             |
| 54 |                |                                                             |
| 55 |                |                                                             |
| 56 |                |                                                             |
| 57 |                |                                                             |
| 58 |                |                                                             |
| 59 |                |                                                             |
| 60 |                |                                                             |

| <b>medcode</b> | <b>readcode</b> | <b>readterm</b>                                  |
|----------------|-----------------|--------------------------------------------------|
| 102371         | 8Hu..00         | Admission to accident and emergency department   |
| 18512          | 8H21.00         | Admit medical emergency unsp.                    |
| 29836          | 8H2E.00         | Admit neurology emergency                        |
| 8082           | 9N04.00         | Seen in emergency clinic                         |
| 60440          | 9N19.11         | Seen in accident and emergency department        |
| 9331           | ZL91.00         | Seen by accident and emergency doctor            |
| 314            | 8H2..00         | Emergency hospital admission                     |
| 105952         | 8H2X.00         | Emergency hospital admission from walk-in centre |
| 16588          | 9N1y300         | Seen in emergency clinic                         |

For peer review only

1  
2  
3  
4  
5  
6  
7  
8  
9  
10  
11  
12  
13  
14  
15  
16  
17  
18  
19  
20  
21  
22  
23  
24  
25  
26  
27  
28  
29  
30  
31  
32  
33  
34  
35  
36  
37  
38  
39  
40  
41  
42  
43  
44  
45  
46  
47  
48  
49  
50  
51  
52  
53  
54  
55  
56  
57  
58  
59  
60

| <b>medcode</b> | <b>readcode</b> | <b>readterm</b>    |
|----------------|-----------------|--------------------|
| 4093           | F253.11         | Status epilepticus |

For peer review only



1  
2 **medcode readcode readterm**  
3 11015 667F.00 Seizure free >12 months  
4  
5  
6  
7  
8  
9  
10  
11  
12  
13  
14  
15  
16  
17  
18  
19  
20  
21  
22  
23  
24  
25  
26  
27  
28  
29  
30  
31  
32  
33  
34  
35  
36  
37  
38  
39  
40  
41  
42  
43  
44  
45  
46  
47  
48  
49  
50  
51  
52  
53  
54  
55  
56  
57  
58  
59  
60

For peer review only

|    | <b>medcode</b> | <b>readcode</b> | <b>readterm</b>                                           | <b>smoking</b> |
|----|----------------|-----------------|-----------------------------------------------------------|----------------|
| 1  |                |                 |                                                           |                |
| 2  |                |                 |                                                           |                |
| 3  | 33             | 1371            | Never smoked tobacco                                      | 0              |
| 4  | 60             | 137L.00         | Current non-smoker                                        | 0              |
| 5  | 90             | 137S.00         | Ex smoker                                                 | 0              |
| 6  |                |                 |                                                           |                |
| 7  | 776            | 137K.00         | Stopped smoking                                           | 0              |
| 8  | 11788          | 1371.11         | Non-smoker                                                | 0              |
| 9  | 12946          | 137F.00         | Ex-smoker - amount unknown                                | 0              |
| 10 | 12961          | 1377            | Ex-trivial smoker (<1/day)                                | 0              |
| 11 | 26470          | 137N.00         | Ex pipe smoker                                            | 0              |
| 12 |                |                 |                                                           |                |
| 13 | 97210          | 137j.00         | Ex-cigarette smoker                                       | 0              |
| 14 | 54             | 137..00         | Tobacco consumption                                       | 1              |
| 15 | 93             | 137P.00         | Cigarette smoker                                          | 1              |
| 16 | 1822           | 1376            | Very heavy smoker - 40+cigs/d                             | 1              |
| 17 | 1823           | 137P.11         | Smoker                                                    | 1              |
| 18 |                |                 |                                                           |                |
| 19 | 1878           | 1374            | Moderate smoker - 10-19 cigs/d                            | 1              |
| 20 | 2111           | 6791            | Health ed. - smoking                                      | 1              |
| 21 | 3568           | 1375            | Heavy smoker - 20-39 cigs/day                             | 1              |
| 22 | 7622           | 8CAL.00         | Smoking cessation advice                                  | 1              |
| 23 | 10211          | 13p..00         | Smoking cessation milestones                              | 1              |
| 24 |                |                 |                                                           |                |
| 25 | 10558          | 137R.00         | Current smoker                                            | 1              |
| 26 | 10742          | 8HTK.00         | Referral to stop-smoking clinic                           | 1              |
| 27 | 12240          | 137G.00         | Trying to give up smoking                                 | 1              |
| 28 | 12941          | 1372.11         | Occasional smoker                                         | 1              |
| 29 | 12942          | 137..11         | Smoker - amount smoked                                    | 1              |
| 30 |                |                 |                                                           |                |
| 31 | 12943          | 137J.00         | Cigar smoker                                              | 1              |
| 32 | 12944          | 1373            | Light smoker - 1-9 cigs/day                               | 1              |
| 33 | 12945          | 137M.00         | Rolls own cigarettes                                      | 1              |
| 34 | 12947          | 137H.00         | Pipe smoker                                               | 1              |
| 35 | 12951          | 137Q.11         | Smoking restarted                                         | 1              |
| 36 | 12952          | 137Q.00         | Smoking started                                           | 1              |
| 37 |                |                 |                                                           |                |
| 38 | 12953          | 9001.00         | Attends stop smoking monitor.                             | 1              |
| 39 | 12954          | ZV4K000         | [V]Tobacco use                                            | 1              |
| 40 | 12955          | 1379            | Ex-moderate smoker (10-19/day)                            | 1              |
| 41 | 12956          | 137A.00         | Ex-heavy smoker (20-39/day)                               | 1              |
| 42 | 12957          | 1378            | Ex-light smoker (1-9/day)                                 | 1              |
| 43 |                |                 |                                                           |                |
| 44 | 12958          | 1372            | Trivial smoker - < 1 cig/day                              | 1              |
| 45 | 12959          | 137B.00         | Ex-very heavy smoker (40+/day)                            | 1              |
| 46 | 12960          | 137Z.00         | Tobacco consumption NOS                                   | 1              |
| 47 | 12963          | 137Y.00         | Cigar consumption                                         | 1              |
| 48 |                |                 |                                                           |                |
| 49 | 12964          | 137C.00         | Keeps trying to stop smoking                              | 1              |
| 50 | 12965          | 137X.00         | Cigarette consumption                                     | 1              |
| 51 | 12966          | 137V.00         | Smoking reduced                                           | 1              |
| 52 | 12967          | 137a.00         | Pipe tobacco consumption                                  | 1              |
| 53 |                |                 |                                                           |                |
| 54 | 30423          | 137c.00         | Thinking about stopping smoking                           | 1              |
| 55 | 30762          | 137d.00         | Not interested in stopping smoking                        | 1              |
| 56 | 31114          | 137b.00         | Ready to stop smoking                                     | 1              |
| 57 | 32083          | 900..11         | Stop smoking clinic admin.                                | 1              |
| 58 | 38112          | 13p5.00         | Smoking cessation programme start date                    | 1              |
| 59 | 40417          | 9003.00         | Stop smoking monitor default                              | 1              |
| 60 | 41042          | 8CAg.00         | Smoking cessation advice provided by community pharmacist | 1              |

|    |       |         |                                                      |   |
|----|-------|---------|------------------------------------------------------|---|
| 1  |       |         |                                                      |   |
| 2  | 41979 | 137e.00 | Smoking restarted                                    | 1 |
| 3  | 42722 | 9004.00 | Stop smoking monitor 1st lettr                       | 1 |
| 4  | 53101 | 9007.00 | Stop smoking monitor verb.inv.                       | 1 |
| 5  | 58597 | 9008.00 | Stop smoking monitor phone inv                       | 1 |
| 6  | 60720 | 9005.00 | Stop smoking monitor 2nd lettr                       | 1 |
| 7  |       |         |                                                      |   |
| 8  | 62686 | 137h.00 | Minutes from waking to first tobacco consumption     | 1 |
| 9  | 66387 | 9006.00 | Stop smoking monitor 3rd lettr                       | 1 |
| 10 | 74907 | 745H.00 | Smoking cessation therapy                            | 1 |
| 11 | 90522 | 745Hz00 | Smoking cessation therapy NOS                        | 1 |
| 12 |       |         |                                                      |   |
| 13 | 91708 | 745Hy00 | Other specified smoking cessation therapy            | 1 |
| 14 | 94958 | 745H400 | Smoking cessation drug therapy                       | 1 |
| 15 | 96992 | 9kc..00 | Smoking cessation - enhanced services administration | 1 |
| 16 | 98154 | 8HkQ.00 | Referral to NHS stop smoking service                 | 1 |
| 17 | 98245 | 8HBM.00 | Stop smoking face to face follow-up                  | 1 |
| 18 |       |         |                                                      |   |
| 19 |       |         |                                                      |   |
| 20 |       |         |                                                      |   |
| 21 |       |         |                                                      |   |
| 22 |       |         |                                                      |   |
| 23 |       |         |                                                      |   |
| 24 |       |         |                                                      |   |
| 25 |       |         |                                                      |   |
| 26 |       |         |                                                      |   |
| 27 |       |         |                                                      |   |
| 28 |       |         |                                                      |   |
| 29 |       |         |                                                      |   |
| 30 |       |         |                                                      |   |
| 31 |       |         |                                                      |   |
| 32 |       |         |                                                      |   |
| 33 |       |         |                                                      |   |
| 34 |       |         |                                                      |   |
| 35 |       |         |                                                      |   |
| 36 |       |         |                                                      |   |
| 37 |       |         |                                                      |   |
| 38 |       |         |                                                      |   |
| 39 |       |         |                                                      |   |
| 40 |       |         |                                                      |   |
| 41 |       |         |                                                      |   |
| 42 |       |         |                                                      |   |
| 43 |       |         |                                                      |   |
| 44 |       |         |                                                      |   |
| 45 |       |         |                                                      |   |
| 46 |       |         |                                                      |   |
| 47 |       |         |                                                      |   |
| 48 |       |         |                                                      |   |
| 49 |       |         |                                                      |   |
| 50 |       |         |                                                      |   |
| 51 |       |         |                                                      |   |
| 52 |       |         |                                                      |   |
| 53 |       |         |                                                      |   |
| 54 |       |         |                                                      |   |
| 55 |       |         |                                                      |   |
| 56 |       |         |                                                      |   |
| 57 |       |         |                                                      |   |
| 58 |       |         |                                                      |   |
| 59 |       |         |                                                      |   |
| 60 |       |         |                                                      |   |

**prodcode productname**

63069 Rewisca 75mg capsules (Consilient Health Ltd)  
63088 Rewisca 50mg capsules (Consilient Health Ltd)  
63089 Rewisca 300mg capsules (Consilient Health Ltd)  
63090 Rewisca 150mg capsules (Consilient Health Ltd)  
63091 Rewisca 100mg capsules (Consilient Health Ltd)  
63174 Rewisca 200mg capsules (Consilient Health Ltd)  
63300 Rewisca 25mg capsules (Consilient Health Ltd)  
63317 Rewisca 225mg capsules (Consilient Health Ltd)  
63877 Pregabalin 50mg capsules (A A H Pharmaceuticals Ltd)  
63964 Alzain 25mg capsules (Dr Reddy's Laboratories (UK) Ltd)  
63965 Alzain 100mg capsules (Dr Reddy's Laboratories (UK) Ltd)  
64005 Pregabalin 100mg capsules (A A H Pharmaceuticals Ltd)  
64037 Alzain 300mg capsules (Dr Reddy's Laboratories (UK) Ltd)  
64038 Alzain 225mg capsules (Dr Reddy's Laboratories (UK) Ltd)  
64039 Alzain 150mg capsules (Dr Reddy's Laboratories (UK) Ltd)  
64040 Alzain 75mg capsules (Dr Reddy's Laboratories (UK) Ltd)  
64041 Alzain 50mg capsules (Dr Reddy's Laboratories (UK) Ltd)  
64042 Alzain 200mg capsules (Dr Reddy's Laboratories (UK) Ltd)  
65069 Pregabalin 75mg capsules (Teva UK Ltd)  
65073 Pregabalin 25mg capsules (Teva UK Ltd)  
65218 Lecaent 50mg capsules (Actavis UK Ltd)  
790 Pregabalin 25mg capsules  
819 Pregabalin 75mg capsules  
6631 Pregabalin 150mg capsules  
6936 Pregabalin 50mg capsules  
6949 Pregabalin 200mg capsules  
6999 Pregabalin 100mg capsules  
7005 Pregabalin 300mg capsules  
37801 Pregabalin 225mg capsules  
55972 Pregabalin 150mg/5ml oral solution  
60543 Pregabalin 75mg/5ml oral solution  
64285 Pregabalin 150mg/5ml oral suspension  
65606 Pregabalin 50mg capsules (Accord Healthcare Ltd)  
65787 Pregabalin 50mg capsules (Sandoz Ltd)  
66509 Pregabalin 75mg capsules (Zentiva)  
6584 Lyrica 75mg capsules (Pfizer Ltd)  
7208 Lyrica 100mg capsules (Pfizer Ltd)  
7209 Lyrica 50mg capsules (Pfizer Ltd)  
7394 Lyrica 200mg capsules (Pfizer Ltd)  
10189 Lyrica 300mg capsules (Pfizer Ltd)  
16509 Lyrica 150mg capsules (Pfizer Ltd)  
16542 Lyrica 25mg capsules (Pfizer Ltd)  
38293 Lyrica 225mg capsules (Pfizer Ltd)  
48253 Lyrica 150mg capsules (Lexon (UK) Ltd)  
52547 Lyrica 50mg capsules (Waymade Healthcare Plc)  
64497 Lyrica 75mg capsules (Waymade Healthcare Plc)  
64568 Lyrica 150mg capsules (Sigma Pharmaceuticals Plc)  
65863 Lyrica 75mg capsules (Stephar (U.K.) Ltd)  
51227 Pregabalin 20mg/ml oral solution sugar free

1  
2 51924 Lyrica 20mg/ml oral solution (Pfizer Ltd)  
3 9110 Nydrane 500mg Tablet (Lipha Pharmaceuticals Ltd)  
4 9212 Beclamide 500mg tablets  
5 12931 Epimaz Retard 200mg tablets (IVAX Pharmaceuticals UK Ltd)  
6 12932 Epimaz 100mg tablets (IVAX Pharmaceuticals UK Ltd)  
7 15082 Tegretol 250mg suppositories (Novartis Pharmaceuticals UK Ltd)  
8 17428 Carbamazepine 250mg suppositories  
9 17429 Carbamazepine 125mg suppositories  
10 17978 Teril Retard 200mg tablets (Taro Pharmaceuticals (UK) Ltd)  
11 18011 Teril Retard 400mg tablets (Taro Pharmaceuticals (UK) Ltd)  
12 18762 Epimaz 200mg tablets (Teva UK Ltd)  
13 18763 Epimaz 400mg tablets (Teva UK Ltd)  
14 21441 Tegretol 125mg suppositories (Novartis Pharmaceuticals UK Ltd)  
15 28345 Carbamazepine 100mg tablets (Teva UK Ltd)  
16 32931 Carbamazepine 400mg tablets (Teva UK Ltd)  
17 432 Carbamazepine 100mg tablets  
18 596 Carbamazepine 100mg/5ml oral suspension sugar free  
19 652 Carbamazepine 400mg tablets  
20 1158 Carbamazepine 200mg tablets  
21 2085 Tegretol 200mg tablets (Novartis Pharmaceuticals UK Ltd)  
22 2388 Carbamazepine 200mg modified-release tablets  
23 3569 Carbamazepine 400mg modified-release tablets  
24 4066 Tegretol 400mg tablets (Novartis Pharmaceuticals UK Ltd)  
25 4913 Tegretol 100mg/5ml liquid (Novartis Pharmaceuticals UK Ltd)  
26 4982 Carbamazepine 100mg chewable tablets sugar free  
27 5977 Tegretol 100mg tablets (Novartis Pharmaceuticals UK Ltd)  
28 11696 Carbamazepine 200mg chewable tablets sugar free  
29 12880 Tegretol 200mg Chewtabs (Novartis Pharmaceuticals UK Ltd)  
30 13112 Carbagen SR 200mg tablets (Mylan Ltd)  
31 13524 Tegretol 100mg Chewtabs (Novartis Pharmaceuticals UK Ltd)  
32 26012 Carbagen SR 400mg tablets (Mylan Ltd)  
33 30763 Carbamazepine 100mg tablets (A A H Pharmaceuticals Ltd)  
34 34370 Carbamazepine 200mg modified-release tablets (A A H Pharmaceuticals Ltd)  
35 34904 Carbamazepine 200mg tablets (A A H Pharmaceuticals Ltd)  
36 37058 Carbamazepine 500mg/5ml oral suspension  
37 40404 Carbamazepine 400mg modified-release tablets (A A H Pharmaceuticals Ltd)  
38 43417 Carbamazepine 400mg tablets (A A H Pharmaceuticals Ltd)  
39 45903 Tegretol Prolonged Release 400mg tablets (Novartis Pharmaceuticals UK Ltd)  
40 45941 Tegretol Prolonged Release 200mg tablets (Novartis Pharmaceuticals UK Ltd)  
41 48397 Tegretol Prolonged Release 200mg tablets (DE Pharmaceuticals)  
42 49833 Tegretol 200mg tablets (Lexon (UK) Ltd)  
43 51760 Tegretol 400mg tablets (Lexon (UK) Ltd)  
44 52840 Tegretol Prolonged Release 400mg tablets (Necessity Supplies Ltd)  
45 53492 Tegretol Prolonged Release 200mg tablets (Sigma Pharmaceuticals Plc)  
46 53893 Tegretol Prolonged Release 400mg tablets (Stephar (U.K.) Ltd)  
47 54445 Carbamazepine 400mg tablets (Sigma Pharmaceuticals Plc)  
48 55904 Carbamazepine 100mg tablets (Mylan Ltd)  
49 56734 Carbamazepine 100mg tablets (Phoenix Healthcare Distribution Ltd)  
50 57726 Tegretol Prolonged Release 200mg tablets (Mawdsley-Brooks & Company Ltd)  
51 58515 Tegretol 100mg/5ml liquid (Lexon (UK) Ltd)  
52  
53  
54  
55  
56  
57  
58  
59  
60

1  
2 59038 Carbamazepine 100mg/5ml oral suspension sugar free (A A H Pharmaceuticals Ltd)  
3 59211 Carbamazepine 200mg tablets (Alliance Healthcare (Distribution) Ltd)  
4 59428 Carbamazepine 100mg tablets (Almus Pharmaceuticals Ltd)  
5 59429 Carbamazepine 200mg tablets (Almus Pharmaceuticals Ltd)  
6 59430 Carbamazepine 400mg tablets (Almus Pharmaceuticals Ltd)  
7 59696 Carbamazepine 400mg tablets (Kent Pharmaceuticals Ltd)  
8 59697 Carbamazepine 10mg/5ml oral suspension  
9 59745 Carbamazepine 100mg/5ml oral suspension sugar free (DE Pharmaceuticals)  
10 59746 Carbamazepine 100mg tablets (DE Pharmaceuticals)  
11 59887 Carbamazepine 200mg tablets (Mylan Ltd)  
12 60133 Tegretol Prolonged Release 400mg tablets (Sigma Pharmaceuticals Plc)  
13 60181 Carbagen 100mg tablets (Mylan Ltd)  
14 60187 Carbagen 200mg tablets (Mylan Ltd)  
15 60405 Carbagen 400mg tablets (Mylan Ltd)  
16 61143 Carbamazepine 100mg tablets (Actavis UK Ltd)  
17 61377 Carbamazepine 100mg tablets (Kent Pharmaceuticals Ltd)  
18 62457 Carbamazepine 100mg tablets (Alliance Healthcare (Distribution) Ltd)  
19 62538 Carbamazepine 200mg tablets (Actavis UK Ltd)  
20 63213 Tegretol 200mg tablets (Necessity Supplies Ltd)  
21 63341 Tegretol Prolonged Release 200mg tablets (Lexon (UK) Ltd)  
22 63735 Carbamazepine 400mg tablets (Alliance Healthcare (Distribution) Ltd)  
23 63930 Tegretol 100mg/5ml liquid (DE Pharmaceuticals)  
24 66058 Carbamazepine 200mg tablets (DE Pharmaceuticals)  
25 66073 Carbamazepine 400mg tablets (DE Pharmaceuticals)  
26 66375 Carbamazepine 400mg modified-release tablets (Phoenix Healthcare Distributic  
27 2823 Tegretol retard 200mg Modified-release tablet (Novartis Pharmaceuticals UK Lt  
28 2824 Tegretol retard 400mg Modified-release tablet (Novartis Pharmaceuticals UK Lt  
29 30509 Timonil retard 400mg Modified-release tablet (C P Pharmaceuticals Ltd)  
30 32900 Carbamazepine sr 200mg Tablet (IVAX Pharmaceuticals UK Ltd)  
31 34958 Carbamazepine 100mg Tablet (Berk Pharmaceuticals Ltd)  
32 37800 Carbamazepine 200mg Modified-release tablet (Lagap)  
33 40403 Carbamazepine 400mg Modified-release tablet (Lagap)  
34 41726 Carbamazepine 100mg Tablet (IVAX Pharmaceuticals UK Ltd)  
35 43451 Carbamazepine 400mg Modified-release tablet (Generics (UK) Ltd)  
36 46888 Carbamazepine 200mg Modified-release tablet (Generics (UK) Ltd)  
37 46972 Carbamazepine 200mg Tablet (IVAX Pharmaceuticals UK Ltd)  
38 47294 Carbamazepine sr 400mg Tablet (IVAX Pharmaceuticals UK Ltd)  
39 53188 Carbamazepine 500mg/5ml Oral suspension (Martindale Pharmaceuticals Ltd)  
40 3110 Clobazam 10mg capsules  
41 8487 Frisium 10mg Capsule (Aventis Pharma)  
42 54934 Tapclob 5mg/5ml oral suspension (Martindale Pharmaceuticals Ltd)  
43 55481 Clobazam 10mg/5ml oral suspension sugar free  
44 56781 Tapclob 10mg/5ml oral suspension (Martindale Pharmaceuticals Ltd)  
45 64879 Clobazam 5mg/5ml oral suspension sugar free (A A H Pharmaceuticals Ltd)  
46 3111 Clobazam 10mg tablets  
47 14388 Frisium 10mg tablets (Sanofi)  
48 17054 Clobazam 5mg/5ml oral suspension  
49 20966 Clobazam 10mg/5ml oral suspension  
50 37696 Clobazam 2.5mg capsules  
51 41303 Clobazam 25mg/5ml oral solution



1  
2 46796 Clobazam 10mg/5ml oral solution  
3 46850 Clobazam 5mg/5ml oral solution  
4 48010 Clobazam 25mg/5ml oral suspension  
5 50389 Clobazam 4mg/5ml oral solution  
6 51425 Clobazam 2.5mg/5ml oral solution  
7 52052 Clobazam 4mg/5ml oral suspension  
8 52056 Clobazam 2.5mg/5ml oral suspension  
9 52093 Clobazam 100mg/5ml oral suspension  
10 57510 Frisium 10mg tablets (Waymade Healthcare Plc)  
11 60320 Clobazam 5mg/5ml oral suspension (Special Order)  
12 62926 Clobazam 7.5mg/5ml oral suspension  
13 19324 Clomethiazole 8mg/ml IV infusion  
14 26399 Heminevrin 8mg/ml Intravenous infusion (AstraZeneca UK Ltd)  
15 1559 Clonazepam 500microgram tablets  
16 2073 Clonazepam 2mg tablets  
17 4483 Clonazepam 2.5mg/ml drops sugar free  
18 8029 Rivotril 2mg tablets (Roche Products Ltd)  
19 10650 Rivotril 500microgram tablets (Roche Products Ltd)  
20 13200 Clonazepam 2mg/5ml oral solution sugar free  
21 14743 Clonazepam 500micrograms/5ml oral suspension  
22 17038 Rivotril 2.5mg/1ml drops (Imported (Switzerland))  
23 17637 Clonazepam 500micrograms/5ml solution sugar free  
24 32500 Clonazepam 250micrograms/5ml oral solution  
25 34491 Clonazepam 2mg/5ml oral solution sugar free (Rosemont Pharmaceuticals Ltd)  
26 45077 Clonazepam 500microgram/5ml Oral solution (Rosemont Pharmaceuticals Ltd)  
27 47066 Clonazepam 500micrograms/5ml oral solution  
28 48544 Clonazepam 500micrograms/5ml oral solution sugar free  
29 50108 Clonazepam 2mg/5ml oral solution sugar free  
30 53311 Clonazepam 500microgram tablets (Phoenix Healthcare Distribution Ltd)  
31 53739 Clonazepam 2mg tablets (Sigma Pharmaceuticals Plc)  
32 57664 Clonazepam 250micrograms/5ml oral suspension  
33 58460 Clonazepam 312.5micrograms/5ml oral suspension  
34 58482 Clonazepam 500microgram tablets (A A H Pharmaceuticals Ltd)  
35 59396 Clonazepam 500microgram tablets (Almus Pharmaceuticals Ltd)  
36 61626 Clonazepam 500microgram tablets (Actavis UK Ltd)  
37 64505 Clonazepam 5mg/5ml oral suspension  
38 65238 Clonazepam 10mg/5ml oral solution  
39 816 Clonazepam 1mg/1ml solution for injection ampoules and diluent  
40 26496 Rivotril 1mg/1ml concentrate for solution for injection ampoules (Roche Produc  
41 2630 Dixarit 25microgram tablets (Boehringer Ingelheim Ltd)  
42 5793 Stesolid 10mg Rectal tubes (Dumex Ltd)  
43 8344 Diazepam 5mg suppository  
44 16610 Valium 5mg/ml Injection (Roche Products Ltd)  
45 16734 Diazepam rectubes 20mg Rectal tubes (C P Pharmaceuticals Ltd)  
46 20514 Valium 10mg Suppository (Roche Products Ltd)  
47 23820 Diazepam 20mg rectal tubes  
48 28698 Valium 5mg Suppository (Roche Products Ltd)  
49 38410 Diazepam 5mg Rectal tubes (Hillcross Pharmaceuticals Ltd)  
50 41689 Diazepam 10mg Suppository (Sinclair IS Pharma Plc)  
51 46 Diazepam 2mg tablets

1  
2 47 Diazepam 5mg tablets  
3 1400 Diazepam 10mg tablets  
4 3973 Tensium 10mg tablets (DDSA Pharmaceuticals Ltd)  
5 9065 Diazepam 5mg/5ml oral solution  
6  
7 12124 Diazepam 10mg/2ml solution for injection ampoules  
8 29945 Diazepam 2mg tablets (Ranbaxy (UK) Ltd)  
9 32296 Diazepam 5mg tablets (Actavis UK Ltd)  
10 32417 Diazepam 10mg/2ml solution for injection ampoules (Wockhardt UK Ltd)  
11 33672 Diazepam 2mg tablets (A A H Pharmaceuticals Ltd)  
12 34293 Diazepam 10mg tablets (Mylan Ltd)  
13 34335 Diazepam 2mg tablets (Teva UK Ltd)  
14 34338 Diazepam 2mg tablets (Mylan Ltd)  
15 34340 Diazepam 10mg tablets (Ranbaxy (UK) Ltd)  
16 34482 Diazepam 5mg tablets (Teva UK Ltd)  
17 34524 Diazepam 2mg tablets (Actavis UK Ltd)  
18 34615 Diazepam 5mg tablets (Mylan Ltd)  
19 34635 Diazepam 5mg tablets (A A H Pharmaceuticals Ltd)  
20 34677 Diazepam 2mg tablets (IVAX Pharmaceuticals UK Ltd)  
21 34807 Diazepam 10mg tablets (Actavis UK Ltd)  
22 41607 Diazepam 10mg tablets (Teva UK Ltd)  
23 41632 Diazepam 10mg tablets (A A H Pharmaceuticals Ltd)  
24 42503 Diazepam 5mg/5ml oral solution (A A H Pharmaceuticals Ltd)  
25 45218 Diazepam 5mg tablets (Ranbaxy (UK) Ltd)  
26 45244 Diazepam 5mg tablets (Sandoz Ltd)  
27 45313 Diazepam 2mg tablets (Almus Pharmaceuticals Ltd)  
28 46913 Diazepam 10mg tablets (IVAX Pharmaceuticals UK Ltd)  
29 46966 Diazepam 5mg tablets (IVAX Pharmaceuticals UK Ltd)  
30 51754 Diazepam 10mg/2ml solution for injection ampoules (A A H Pharmaceuticals Ltd)  
31 56236 Diazepam 2mg tablets (Wockhardt UK Ltd)  
32 57749 Diazepam 5mg tablets (Waymade Healthcare Plc)  
33 57838 Diazepam 5mg tablets (Sovereign Medical Ltd)  
34 59122 Diazepam 5mg/5ml oral solution (AM Distributions (Yorkshire) Ltd)  
35 59407 Diazepam 5mg tablets (DE Pharmaceuticals)  
36 60936 Diazepam 5mg tablets (Arrow Generics Ltd)  
37 62216 Diazepam 10mg tablets (Almus Pharmaceuticals Ltd)  
38 62541 Diazepam 2mg tablets (Sovereign Medical Ltd)  
39 63238 Diazepam 2mg tablets (Waymade Healthcare Plc)  
40 63694 Diazepam 2mg tablets (Phoenix Healthcare Distribution Ltd)  
41 64200 Diazepam 2mg tablets (Alliance Healthcare (Distribution) Ltd)  
42 2078 Diazepam 5mg RecTubes (Wockhardt UK Ltd)  
43 2083 Diazepam 10mg RecTubes (Wockhardt UK Ltd)  
44 2352 Diazepam 2mg/5ml oral solution  
45 4176 Diazepam 10mg/2.5ml rectal solution tube  
46 4395 Stesolid 5mg rectal tube (Actavis UK Ltd)  
47 5842 Diazepam 2.5mg/1.25ml rectal solution tube  
48 6747 Diazepam 5mg/2.5ml rectal solution tube  
49 8334 Diazepam 10mg suppositories  
50 8345 Stesolid 10mg rectal tube (Actavis UK Ltd)  
51 9430 Diazepam 2.5mg/5ml oral suspension  
52  
53 12237 Diazepam 10mg/2ml emulsion for injection ampoules

1  
2 12849 Diazepam 10mg/5ml oral suspension  
3 13756 Diazemuls 10mg/2ml emulsion for injection ampoules (Actavis UK Ltd)  
4 18488 Diazepam 2.5mg RecTubes (Wockhardt UK Ltd)  
5 32853 Diazepam 2mg/5ml oral solution (Sandoz Ltd)  
6 33776 Diazepam 10mg/2ml solution for injection ampoules (Hameln Pharmaceuticals)  
7 34033 Diazepam 5mg/2.5ml rectal solution tube (Sandoz Ltd)  
8 34045 Diazepam 5mg/5ml oral solution (Sandoz Ltd)  
9 34614 Diazepam 10mg/2.5ml rectal solution tube (Sandoz Ltd)  
10 51335 Diazepam 10mg/5ml oral solution  
11 53566 Diazepam 2.5mg/5ml oral solution  
12 58959 Diazepam 10mg/5ml oral solution (AM Distributions (Yorkshire) Ltd)  
13 41758 Eslicarbazepine 800mg tablets  
14 42145 Zebinix 800mg tablets (Eisai Ltd)  
15 3108 Ethosuximide 250mg capsules  
16 3446 Zarontin 250mg capsules (Pfizer Ltd)  
17 5791 Ethosuximide 250mg/5ml oral solution  
18 5956 Zarontin 250mg/5ml syrup (Pfizer Ltd)  
19 18729 Emeside 250mg/5ml Oral solution (Laboratories For Applied Biology Ltd)  
20 18911 Emeside 250mg capsules (Chemidex Pharma Ltd)  
21 26302 Emeside 250mg Capsule (Laboratories For Applied Biology Ltd)  
22 33828 Emeside 250mg/5ml syrup (Essential Pharma Ltd)  
23 53066 Felbamate 600mg tablets  
24 25903 Fosphenytoin 750mg/10ml solution for injection vials  
25 27967 Pro-Epanutin 750mg/10ml concentrate for solution for injection vials (Pfizer Ltd)  
26 660 Gabapentin 100mg capsules  
27 1584 Gabapentin 300mg capsules  
28 4781 Gabapentin 400mg capsules  
29 5221 Gabapentin 600mg tablets  
30 6304 Neurontin 300mg capsules (Pfizer Ltd)  
31 7538 Gabapentin 800mg tablets  
32 10007 Neurontin 100mg capsules (Pfizer Ltd)  
33 16215 Neurontin 400mg capsules (Pfizer Ltd)  
34 17564 Neurontin 600mg tablets (Pfizer Ltd)  
35 18211 Gabapentin 250mg/5ml oral solution  
36 25815 Gabapentin 400mg/5ml oral suspension  
37 27454 Gabapentin 300mg capsules (Teva UK Ltd)  
38 28713 Neurontin 800mg tablets (Pfizer Ltd)  
39 34506 Gabapentin 100mg capsules (Teva UK Ltd)  
40 34606 Gabapentin 100mg capsules (A A H Pharmaceuticals Ltd)  
41 34716 Gabapentin 300mg capsules (A A H Pharmaceuticals Ltd)  
42 34946 Gabapentin 600mg tablets (Teva UK Ltd)  
43 44022 Gabapentin 250mg/5ml oral suspension  
44 44187 Gabapentin 600mg tablets (A A H Pharmaceuticals Ltd)  
45 44261 Gabapentin 250mg/5ml Oral solution (Boots Pharmaceuticals Ltd)  
46 47579 Gabapentin 100mg capsules (Sandoz Ltd)  
47 48035 Gabapentin 300mg capsules (Mylan Ltd)  
48 48060 Gabapentin 300mg capsules (Sandoz Ltd)  
49 51118 Gabapentin 300mg capsules (Ranbaxy (UK) Ltd)  
50 53296 Gabapentin 300mg capsules (Actavis UK Ltd)  
51 53784 Gabapentin 300mg/5ml oral solution

1  
2 55624 Gabapentin 300mg capsules (Bristol Laboratories Ltd)  
3 57120 Gabapentin 100mg capsules (Mylan Ltd)  
4 57527 Neurontin 300mg capsules (Dowelhurst Ltd)  
5 57649 Gabapentin 300mg capsules (Arrow Generics Ltd)  
6 58382 Gabapentin 100mg capsules (Actavis UK Ltd)  
7 58383 Gabapentin 400mg capsules (Almus Pharmaceuticals Ltd)  
8 58472 Gabapentin 300mg/5ml oral suspension  
9 58960 Gabapentin 100mg capsules (Zentiva)  
10 59147 Gabapentin 600mg tablets (Zentiva)  
11 60389 Gabapentin 300mg capsules (Creo Pharma Ltd)  
12 61266 Gabapentin 300mg capsules (Waymade Healthcare Plc)  
13 63432 Gabapentin 300mg capsules (Zentiva)  
14 64213 Gabapentin 600mg tablets (DE Pharmaceuticals)  
15 64302 Gabapentin 300mg capsules (Alliance Healthcare (Distribution) Ltd)  
16 64306 Gabapentin 50mg/ml oral solution sugar free (Alliance Healthcare (Distribution))  
17 64981 Gabapentin 100mg/5ml oral solution  
18 38789 Lacosamide 50mg tablets  
19 39126 Lacosamide 100mg tablets  
20 39259 Lacosamide 150mg tablets  
21 39356 Vimpat 100mg tablets (UCB Pharma Ltd)  
22 39385 Lacosamide 200mg tablets  
23 39615 Vimpat 50mg tablets (UCB Pharma Ltd)  
24 39952 Vimpat 15mg/ml syrup (UCB Pharma Ltd)  
25 40291 Lacosamide 200mg/20ml solution for infusion vials  
26 40372 Lacosamide 15mg/ml oral solution sugar free  
27 40658 Vimpat 200mg tablets (UCB Pharma Ltd)  
28 41162 Vimpat 150mg tablets (UCB Pharma Ltd)  
29 49084 Lacosamide 10mg/ml oral solution sugar free  
30 52473 Vimpat 10mg/ml syrup (UCB Pharma Ltd)  
31 2079 Lamotrigine 25mg tablets  
32 2080 Lamotrigine 50mg tablets  
33 2081 Lamotrigine 5mg dispersible tablets sugar free  
34 3886 Lamotrigine 200mg tablets  
35 4586 Lamictal 25mg tablets (GlaxoSmithKline UK Ltd)  
36 5076 Lamotrigine 100mg tablets  
37 5658 Lamotrigine 25mg dispersible tablets sugar free  
38 5722 Lamictal 100mg dispersible tablets (GlaxoSmithKline UK Ltd)  
39 5907 Lamotrigine 100mg dispersible tablets sugar free  
40 6409 Lamotrigine 2mg dispersible tablets sugar free  
41 7022 Lamictal 50mg tablets (GlaxoSmithKline UK Ltd)  
42 7023 Lamictal 100mg tablets (GlaxoSmithKline UK Ltd)  
43 10111 Lamictal 200mg tablets (GlaxoSmithKline UK Ltd)  
44 11445 Lamictal 25mg dispersible tablets (GlaxoSmithKline UK Ltd)  
45 15126 Lamictal 5mg dispersible tablets (GlaxoSmithKline UK Ltd)  
46 16149 Lamotrigine 50mg dispersible tablets sugar free  
47 19296 Lamictal 2mg dispersible tablets (GlaxoSmithKline UK Ltd)  
48 29619 Lamotrigine 25mg tablets (Actavis UK Ltd)  
49 29620 Lamotrigine 100mg tablets (Actavis UK Ltd)  
50 32920 Lamotrigine 25mg tablets (Mylan Ltd)  
51 35732 Lamotrigine 25mg dispersible tablets sugar free (Arrow Generics Ltd)  
52  
53  
54  
55  
56  
57  
58  
59  
60

1  
2 39506 Lamotrigine 50mg tablets (Actavis UK Ltd)  
3 39714 Lamotrigine 25mg tablets (Teva UK Ltd)  
4 39715 Lamotrigine 100mg tablets (Teva UK Ltd)  
5 45572 Lamotrigine 50mg Suppository  
6 46775 Lamotrigine 50mg tablets (Teva UK Ltd)  
7 47817 Lamotrigine 50mg tablets (IVAX Pharmaceuticals UK Ltd)  
8 47963 Lamotrigine 25mg tablets (Fannin UK Ltd)  
9 48164 Lamotrigine 25mg dispersible tablets sugar free (A A H Pharmaceuticals Ltd)  
10 48182 Lamotrigine 25mg tablets (Arrow Generics Ltd)  
11 49532 Lamotrigine 25mg tablets (Accord Healthcare Ltd)  
12 50235 Lamotrigine 25mg tablets (A A H Pharmaceuticals Ltd)  
13 51309 Lamictal 25mg tablets (DE Pharmaceuticals)  
14 51501 Lamictal 25mg tablets (Lexon (UK) Ltd)  
15 54276 Lamotrigine 5mg dispersible tablets sugar free (Actavis UK Ltd)  
16 55644 Lamotrigine 25mg tablets (Bristol Laboratories Ltd)  
17 56504 Lamotrigine 25mg dispersible tablets sugar free (Tillomed Laboratories Ltd)  
18 57863 Lamotrigine 50mg tablets (Alliance Healthcare (Distribution) Ltd)  
19 59120 Lamotrigine 100mg tablets (A A H Pharmaceuticals Ltd)  
20 59125 Lamotrigine 100mg tablets (Alliance Healthcare (Distribution) Ltd)  
21 59241 Lamotrigine 100mg dispersible tablets sugar free (Teva UK Ltd)  
22 59242 Lamotrigine 25mg dispersible tablets sugar free (Teva UK Ltd)  
23 59273 Lamotrigine 50mg tablets (A A H Pharmaceuticals Ltd)  
24 59318 Lamotrigine 25mg tablets (Alliance Healthcare (Distribution) Ltd)  
25 59609 Lamotrigine 100mg dispersible tablets sugar free (A A H Pharmaceuticals Ltd)  
26 60268 Lamotrigine 200mg tablets (A A H Pharmaceuticals Ltd)  
27 60424 Lamictal 25mg dispersible tablets (Lexon (UK) Ltd)  
28 60578 Lamotrigine 200mg tablets (Waymade Healthcare Plc)  
29 60804 Lamotrigine 50mg/5ml oral suspension  
30 61623 Lamotrigine 50mg tablets (Accord Healthcare Ltd)  
31 61624 Lamotrigine 100mg tablets (Accord Healthcare Ltd)  
32 61625 Lamotrigine 200mg tablets (Accord Healthcare Ltd)  
33 62869 Lamotrigine 50mg tablets (Sigma Pharmaceuticals Plc)  
34 63973 Lamotrigine 25mg dispersible tablets sugar free (Actavis UK Ltd)  
35 64600 Lamotrigine 100mg tablets (Kent Pharmaceuticals Ltd)  
36 65965 Lamictal 50mg tablets (DE Pharmaceuticals)  
37 65969 Lamotrigine 5mg/5ml oral solution  
38 66417 Lamotrigine 200mg tablets (Teva UK Ltd)  
39 6021 Keppra 250mg tablets (UCB Pharma Ltd)  
40 6022 Levetiracetam 250mg tablets  
41 6047 Levetiracetam 1g tablets  
42 6068 Levetiracetam 500mg tablets  
43 6858 Levetiracetam 100mg/ml oral solution sugar free  
44 10247 Keppra 500mg tablets (UCB Pharma Ltd)  
45 11715 Levetiracetam 750mg tablets  
46 15227 Keppra 1g tablets (UCB Pharma Ltd)  
47 16080 Keppra 750mg tablets (UCB Pharma Ltd)  
48 20640 Keppra 100mg/ml oral solution (UCB Pharma Ltd)  
49 22763 Levetiracetam 500mg/5ml solution for infusion vials  
50 36327 Keppra 500mg/5ml concentrate for solution for infusion vials (UCB Pharma Ltd)  
51 50110 Keppra 250mg tablets (Mawdsley-Brooks & Company Ltd)



1  
2 51108 Levetiracetam 500mg tablets (Accord Healthcare Ltd)  
3 51756 Keppra 100mg/ml oral solution (Lexon (UK) Ltd)  
4 52007 Keppra 500mg tablets (Sigma Pharmaceuticals Plc)  
5 52623 Keppra 250mg tablets (Sigma Pharmaceuticals Plc)  
6 53016 Keppra 100mg/ml oral solution (Sigma Pharmaceuticals Plc)  
7 53307 Levetiracetam 100mg/ml oral solution sugar free (A A H Pharmaceuticals Ltd)  
8 53343 Keppra 1g tablets (Lexon (UK) Ltd)  
9 53476 Keppra 250mg tablets (Waymade Healthcare Plc)  
10 54500 Levetiracetam 250mg granules sachets sugar free  
11 54631 Levetiracetam 500mg tablets (Teva UK Ltd)  
12 54632 Levetiracetam 250mg tablets (Teva UK Ltd)  
13 54739 Levetiracetam 500mg tablets (Alliance Healthcare (Distribution) Ltd)  
14 56755 Levetiracetam 250mg/5ml oral suspension  
15 58706 Levetiracetam 250mg tablets (Zentiva)  
16 59128 Levetiracetam 250mg tablets (Accord Healthcare Ltd)  
17 59964 Desitrend 250mg granules sachets (Desitin Pharma Ltd)  
18 61166 Levetiracetam 100mg/ml oral solution sugar free (Beacon Pharmaceuticals Ltd)  
19 61462 Levetiracetam 250mg tablets (DE Pharmaceuticals)  
20 61468 Keppra 250mg tablets (Necessity Supplies Ltd)  
21 61529 Desitrend 100mg/ml oral solution (Desitin Pharma Ltd)  
22 61793 Matever 750mg tablets (Aspire Pharma Ltd)  
23 62588 Matever 250mg tablets (Aspire Pharma Ltd)  
24 63042 Matever 500mg tablets (Aspire Pharma Ltd)  
25 63372 Levetiracetam 1g tablets (Zentiva)  
26 63842 Levetiracetam 250mg tablets (Actavis UK Ltd)  
27 64026 Levetiracetam 250mg tablets (A A H Pharmaceuticals Ltd)  
28 64817 Levetiracetam 1g tablets (Rivopharm (UK) Ltd)  
29 65827 Levetiracetam 100mg/ml oral solution sugar free (Actavis UK Ltd)  
30 664 Lorazepam 4mg/1ml solution for injection ampoules  
31 7444 Ativan 4mg/1ml solution for injection ampoules (Pfizer Ltd)  
32 41186 Mesuximide 300mg Capsule  
33 45615 Midazolam 5mg/1ml oromucosal solution pre-filled oral syringes  
34 45974 Buccolam 5mg/1ml oromucosal solution pre-filled oral syringes (Shire Pharmace  
35 46667 Midazolam 10mg/2ml oromucosal solution pre-filled oral syringes  
36 46757 Midazolam 7.5mg/1.5ml oromucosal solution pre-filled oral syringes  
37 46797 Buccolam 7.5mg/1.5ml oromucosal solution pre-filled oral syringes (Shire Pharn  
38 46826 Buccolam 10mg/2ml oromucosal solution pre-filled oral syringes (Shire Pharma  
39 46883 Midazolam 2.5mg/0.5ml oromucosal solution pre-filled oral syringes  
40 47045 Buccolam 2.5mg/0.5ml oromucosal solution pre-filled oral syringes (Shire Pharn  
41 49534 Midazolam 5mg/0.5ml oromucosal solution pre-filled syringes  
42 51550 Epistatus 10mg/1ml oromucosal solution (Special Products Ltd)  
43 51925 Epistatus 7.5mg/0.75ml oromucosal solution pre-filled oral syringes (Special Prc  
44 53306 Epistatus 10mg/1ml oromucosal solution pre-filled oral syringes (Special Produc  
45 53748 Midazolam 7.5mg/0.75ml oromucosal solution pre-filled syringes  
46 54919 Epistatus 5mg/0.5ml oromucosal solution pre-filled oral syringes (Special Produ  
47 7301 Midazolam 10mg/ml buccal solution  
48 10278 Epistatus 10mg/ml Oromucosal solution (Special Products Ltd)  
49 43450 Midazolam Oral solution  
50 44764 Midazolam maleate buccal solution  
51 55642 Epistatus 2.5mg/0.25ml oromucosal solution pre-filled oral syringes (Special Prc  
52  
53  
54  
55  
56  
57  
58  
59  
60



1  
2 50489 Paraldehyde 50% in Olive oil rectal solution (Drug Tariff Special Order)  
3 5449 Oxcarbazepine 300mg tablets  
4 6436 Oxcarbazepine 600mg tablets  
5 6552 Oxcarbazepine 150mg tablets  
6 7020 Trileptal 300mg tablets (Novartis Pharmaceuticals UK Ltd)  
7 7021 Trileptal 150mg tablets (Novartis Pharmaceuticals UK Ltd)  
8 14199 Oxcarbazepine 60mg/ml oral suspension sugar free  
9 18567 Trileptal 600mg tablets (Novartis Pharmaceuticals UK Ltd)  
10 26902 Trileptal 60mg/ml oral suspension (Novartis Pharmaceuticals UK Ltd)  
11 15066 Paraldehyde intravenous injection  
12 16699 Paraldehyde intramuscular injection  
13 16799 Paraldehyde rectal solution  
14 50285 Perampanel 2mg tablets  
15 53082 Perampanel 4mg tablets  
16 54146 Fycompa 2mg tablets (Eisai Ltd)  
17 54194 Perampanel 6mg tablets  
18 54195 Perampanel 8mg tablets  
19 54594 Perampanel 10mg tablets  
20 54595 Perampanel 12mg tablets  
21 54872 Fycompa 4mg tablets (Eisai Ltd)  
22 54905 Fycompa 8mg tablets (Eisai Ltd)  
23 57349 Fycompa 6mg tablets (Eisai Ltd)  
24 59622 Fycompa 10mg tablets (Eisai Ltd)  
25 60083 Fycompa 12mg tablets (Eisai Ltd)  
26 3225 Phenobarbital sodium 30mg tablet  
27 4496 Phenobarbital 100mg tablet  
28 10273 Phenobarbital 50mg/5ml oral solution  
29 14762 Phenobarbital 60mg/1ml solution for injection ampoules  
30 14763 Phenobarbital 200mg/1ml solution for injection ampoules  
31 15022 Methylphenobarbital 200mg Tablet  
32 18457 Phenobarbital 30mg/1ml solution for injection ampoules  
33 19024 Prominal 200mg Tablet (Sanofi-Synthelabo Ltd)  
34 19907 Phenobarbital sodium 60mg tablet  
35 21488 Luminal 30mg Tablet (Sanofi-Synthelabo Ltd)  
36 23237 Phenobarbital 15mg/1ml solution for injection ampoules  
37 23349 Prominal 60mg Tablet (Sanofi-Synthelabo Ltd)  
38 23767 Methylphenobarbital 60mg Tablet  
39 23768 Methylphenobarbital 30mg Tablet  
40 24821 Gardenal Sodium 200mg/1ml solution for injection ampoules (Concord Pharma)  
41 25146 Prominal 30mg Tablet (Sanofi-Synthelabo Ltd)  
42 25285 Luminal 60mg Tablet (Sanofi-Synthelabo Ltd)  
43 32783 Luminal 15mg Tablet (Sanofi-Synthelabo Ltd)  
44 34275 Phenobarbital 15mg/5ml Oral solution (William Ransom)  
45 41973 Phenobarbital 15mg Tablet (Celltech Pharma Europe Ltd)  
46 47812 Phenobarbital 60mg Tablet (Celltech Pharma Europe Ltd)  
47 55796 Phenobarbital sodium 15mg/5ml oral solution  
48 5439 Phenobarbital 15mg tablets  
49 29306 Phenobarbital 15mg tablets (Teva UK Ltd)  
50 35164 Phenobarbital 50mg/5ml oral suspension  
51 39618 Phenobarbital 20mg/5ml oral solution  
52  
53  
54  
55  
56  
57  
58  
59  
60

|    |                                                                                |
|----|--------------------------------------------------------------------------------|
| 1  |                                                                                |
| 2  | 45370 Phenobarbital 75mg/5ml oral solution                                     |
| 3  | 51326 Phenobarbital 50mg/5ml oral solution                                     |
| 4  | 55502 Phenobarbital 75mg/5ml oral suspension                                   |
| 5  | 57247 Phenobarbital 100mg/5ml oral suspension                                  |
| 6  | 57722 Phenobarbital 25mg/5ml oral solution                                     |
| 7  |                                                                                |
| 8  | 58905 Phenobarbital 15mg/5ml elixir (Alliance Healthcare (Distribution) Ltd)   |
| 9  | 59013 Phenobarbital 60mg/5ml oral solution                                     |
| 10 | 59232 Phenobarbital 15mg/5ml elixir (A A H Pharmaceuticals Ltd)                |
| 11 | 59574 Phenobarbital 15mg tablets (Kent Pharmaceuticals Ltd)                    |
| 12 |                                                                                |
| 13 | 59795 Phenobarbital 15mg tablets (Bristol Laboratories Ltd)                    |
| 14 | 59868 Phenobarbital 15mg tablets (A A H Pharmaceuticals Ltd)                   |
| 15 | 59917 Phenobarbital 50mg/5ml oral solution (Drug Tariff Special Order)         |
| 16 | 60212 Phenobarbital 15mg/5ml oral solution                                     |
| 17 | 61217 Phenobarbital 50mg/5ml oral suspension (Drug Tariff Special Order)       |
| 18 |                                                                                |
| 19 | 2062 Phenytoin sodium 100mg tablets                                            |
| 20 | 4175 Epanutin 30mg/5ml oral suspension (Pfizer Ltd)                            |
| 21 | 4490 Phenytoin 30mg/5ml oral suspension                                        |
| 22 | 5587 Phenytoin sodium 50mg capsules                                            |
| 23 | 6504 Phenytoin sodium 100mg capsules                                           |
| 24 | 6594 Phenytoin sodium 300mg capsules                                           |
| 25 | 6624 Phenytoin sodium 25mg capsules                                            |
| 26 |                                                                                |
| 27 | 14857 Phenytoin 50mg chewable tablets                                          |
| 28 | 17177 Epanutin Infatabs 50mg chewable tablets (Pfizer Ltd)                     |
| 29 | 27113 Phenytoin sodium 100mg tablets (Teva UK Ltd)                             |
| 30 | 34144 Phenytoin sodium 100mg tablets (Actavis UK Ltd)                          |
| 31 | 34592 Phenytoin sodium 100mg tablets (A A H Pharmaceuticals Ltd)               |
| 32 | 47014 Phenytoin 90mg/5ml oral suspension                                       |
| 33 | 49789 Phenytoin sodium 50mg capsules (Flynn Pharma Ltd)                        |
| 34 | 50147 Phenytoin sodium 100mg capsules (Flynn Pharma Ltd)                       |
| 35 | 50148 Phenytoin sodium 25mg capsules (Flynn Pharma Ltd)                        |
| 36 | 50159 Phenytoin sodium 300mg capsules (Flynn Pharma Ltd)                       |
| 37 |                                                                                |
| 38 | 53749 Phenytoin sodium 100mg capsules (A A H Pharmaceuticals Ltd)              |
| 39 | 53750 Phenytoin sodium 50mg capsules (A A H Pharmaceuticals Ltd)               |
| 40 | 53846 Phenytoin sodium 300mg capsules (A A H Pharmaceuticals Ltd)              |
| 41 | 56786 Phenytoin sodium 100mg tablets (Milpharm Ltd)                            |
| 42 |                                                                                |
| 43 | 58539 Phenytoin 90mg/5ml oral solution                                         |
| 44 | 59082 Phenytoin sodium 100mg capsules (Alliance Healthcare (Distribution) Ltd) |
| 45 | 59293 Phenytoin sodium 300mg capsules (Alliance Healthcare (Distribution) Ltd) |
| 46 | 59377 Phenytoin sodium 100mg capsules (Actavis UK Ltd)                         |
| 47 | 59378 Phenytoin sodium 100mg tablets (Wockhardt UK Ltd)                        |
| 48 |                                                                                |
| 49 | 59467 Phenytoin sodium 25mg capsules (Alliance Healthcare (Distribution) Ltd)  |
| 50 | 59504 Phenytoin sodium 100mg tablets (Alliance Healthcare (Distribution) Ltd)  |
| 51 | 60245 Phenytoin 90mg/5ml oral suspension (Drug Tariff Special Order)           |
| 52 | 60573 Phenytoin sodium 50mg capsules (Alliance Healthcare (Distribution) Ltd)  |
| 53 | 61769 Phenytoin sodium 25mg capsules (A A H Pharmaceuticals Ltd)               |
| 54 | 62181 Phenytoin sodium 100mg tablets (Kent Pharmaceuticals Ltd)                |
| 55 | 66347 Phenytoin sodium 100mg capsules (Sigma Pharmaceuticals Plc)              |
| 56 | 66608 Phenytoin sodium 100mg tablets (Waymade Healthcare Plc)                  |
| 57 |                                                                                |
| 58 | 1398 Epanutin 100mg capsules (Pfizer Ltd)                                      |
| 59 | 2782 Phenytoin sodium 50mg tablets                                             |
| 60 |                                                                                |

1 3881 Epanutin 50mg capsules (Pfizer Ltd)  
2 7498 Epanutin 25mg capsules (Pfizer Ltd)  
3 10263 Epanutin 300mg capsules (Pfizer Ltd)  
4 12469 Epanutin Ready-Mixed Parenteral 250mg/5ml solution for injection ampoules (f  
5 24637 Phenytoin sodium 250mg/5ml solution for injection ampoules  
6 107 Phenytoin 25mg capsule  
7 1370 Phenytoin 100mg capsule  
8 2128 Phenytoin 50mg capsule  
9 3068 Phenytoin 300mg capsule  
10 9678 Phenytoin 90mg/5ml oral solution sugar free  
11 21854 Pentran 100mg Tablet (Berk Pharmaceuticals Ltd)  
12 30392 Pentran 50mg Tablet (Berk Pharmaceuticals Ltd)  
13 34699 Phenytoin 90mg/5ml Oral suspension sugar free (Rosemont Pharmaceuticals Lt  
14 47670 Phenytoin 100mg Capsule (Actavis UK Ltd)  
15 62650 Phenytoin 100mg Tablet (Berk Pharmaceuticals Ltd)  
16 22399 Potassium bromide mixture  
17 209 Primidone 250mg/5ml oral suspension  
18 1157 Primidone 250mg tablets  
19 4456 Mysoline 250mg Tablet (AstraZeneca UK Ltd)  
20 10092 Mysoline 250mg tablets (SERB)  
21 15030 Mysoline 250mg/5ml Oral suspension (AstraZeneca UK Ltd)  
22 24627 Primidone 25mg/5ml oral suspension  
23 33252 Primidone 62.5mg/5ml oral suspension  
24 35835 Primidone 50mg/5ml oral suspension  
25 37883 Primidone 100mg/5ml oral solution  
26 44599 Primidone 50mg tablets  
27 45476 Mysoline 50mg tablets (SERB)  
28 50696 Primidone 250mg/5ml oral suspension (Special Order)  
29 53172 Primidone 50mg capsules  
30 59047 Mysoline 250mg tablets (DE Pharmaceuticals)  
31 59088 Primidone 250mg tablets (SERB)  
32 59389 Primidone 250mg tablets (A A H Pharmaceuticals Ltd)  
33 59413 Primidone 50mg tablets (SERB)  
34 59451 Primidone 250mg tablets (Alliance Healthcare (Distribution) Ltd)  
35 59838 Primidone 50mg tablets (Alliance Healthcare (Distribution) Ltd)  
36 60978 Primidone 50mg tablets (A A H Pharmaceuticals Ltd)  
37 64110 Primidone 25mg/5ml oral suspension (Special Order)  
38 64127 Primidone 50mg/5ml oral suspension (Drug Tariff Special Order)  
39 64635 Primidone 62.5mg/5ml oral suspension (Drug Tariff Special Order)  
40 1557 Pyridoxine 50mg tablets  
41 27109 Pyridoxine 50mg tablets (A A H Pharmaceuticals Ltd)  
42 46943 Pyridoxine 50mg tablets (Wockhardt UK Ltd)  
43 50305 Pyridoxine 100mg capsules  
44 61404 HealthAid Vitamin B6 50mg tablets (HealthAid Ltd)  
45 44363 Pyridoxine 100mg/5ml oral solution  
46 57713 Pyridoxine 250mg/5ml oral suspension  
47 58238 Pyridoxine 10mg/5ml oral suspension  
48 61940 Pyridoxine 50mg/5ml oral suspension  
49 63740 Pyridoxine 100mg/5ml oral suspension  
50 46319 Trobalt 50mg tablets (GlaxoSmithKline UK Ltd)

1  
2 46320 Trobalt 100mg tablets (GlaxoSmithKline UK Ltd)  
3 46380 Retigabine 100mg tablets  
4 46381 Retigabine 50mg tablets  
5 46622 Retigabine 200mg tablets  
6 46787 Retigabine 50mg tablets and Retigabine 100mg tablets  
7 46788 Retigabine 300mg tablets  
8 47032 Trobalt 200mg tablets (GlaxoSmithKline UK Ltd)  
9 47715 Trobalt 300mg tablets (GlaxoSmithKline UK Ltd)  
10 47770 Retigabine 400mg tablets  
11 54190 Trobalt 400mg tablets (GlaxoSmithKline UK Ltd)  
12 37416 Rufinamide 200mg tablets  
13 37512 Inovelon 200mg tablets (Eisai Ltd)  
14 37515 Rufinamide 100mg tablets  
15 37895 Rufinamide 400mg tablets  
16 40521 Inovelon 400mg tablets (Eisai Ltd)  
17 43919 Inovelon 100mg tablets (Eisai Ltd)  
18 51416 Rufinamide 40mg/ml oral suspension sugar free  
19 584 Sodium valproate 200mg gastro-resistant tablets  
20 1550 Sodium valproate 200mg/5ml oral solution  
21 2082 Epilim 200mg/5ml liquid (Sanofi)  
22 2822 Epilim ec 500mg Gastro-resistant tablet (Sanofi)  
23 3107 Epilim Chrono 500 tablets (Sanofi)  
24 3350 Sodium valproate 500mg gastro-resistant tablets  
25 3731 Epilim ec 200mg Gastro-resistant tablet (Sanofi)  
26 3733 Epilim Chrono 300 tablets (Sanofi)  
27 3734 Epilim Chrono 200 tablets (Sanofi)  
28 3845 Sodium valproate 200mg/5ml oral solution sugar free  
29 4195 Epilim 100mg crushable tablets (Sanofi)  
30 4495 Epilim 200mg/5ml syrup (Sanofi)  
31 4502 Sodium valproate 100mg tablets  
32 6560 Sodium valproate 500mg modified-release tablets  
33 6711 Sodium valproate 300mg modified-release tablets  
34 7011 Sodium valproate with valproic acid 300mg modified release tablets  
35 8885 Orlept 500mg gastro-resistant tablets (Wockhardt UK Ltd)  
36 9281 Sodium valproate with valproic acid 200mg modified release tablets  
37 11075 Sodium valproate with valproic acid 500mg modified release tablets  
38 16609 Sodium valproate 400mg powder and solvent for solution for injection vials  
39 17152 Orlept 200mg gastro-resistant tablets (Wockhardt UK Ltd)  
40 20004 Epilim Intravenous 400mg powder and solvent for solution for injection vials (Se  
41 24153 Orlept SF 200mg/5ml liquid (Wockhardt UK Ltd)  
42 30081 Sodium valproate CR 500mg Tablet (Hillcross Pharmaceuticals Ltd)  
43 33058 Epival CR 500mg tablets (Chanelle Medical UK Ltd)  
44 33106 Sodium valproate 200mg/5ml Oral solution (IVAX Pharmaceuticals UK Ltd)  
45 34120 Sodium valproate 200mg gastro-resistant tablets (A A H Pharmaceuticals Ltd)  
46 34150 Valproate sodium 200mg Gastro-resistant tablet (IVAX Pharmaceuticals UK Ltd)  
47 34151 Valproate sodium 500mg Gastro-resistant tablet (IVAX Pharmaceuticals UK Ltd)  
48 34178 Sodium valproate 500mg gastro-resistant tablets (A A H Pharmaceuticals Ltd)  
49 34414 Sodium valproate 200mg Tablet (Sterwin Medicines)  
50 34626 Sodium valproate 200mg gastro-resistant tablets (Mylan Ltd)  
51 34632 Sodium valproate 200mg gastro-resistant tablets (Teva UK Ltd)

1 34707 Sodium valproate 200mg gastro-resistant tablets (IVAX Pharmaceuticals UK Ltd)  
2 34883 Sodium valproate 200mg/5ml oral solution sugar free (A A H Pharmaceuticals Li  
3 35024 Sodium valproate 300mg modified-release capsules  
4 35471 Sodium valproate 150mg modified-release capsules  
5 35747 Episenta 300mg modified-release capsules (Desitin Pharma Ltd)  
6 35755 Sodium valproate 500mg modified-release granules sachets sugar free  
7 36318 Sodium valproate 1g modified-release granules sachets sugar free  
8 36633 Episenta 150mg modified-release capsules (Desitin Pharma Ltd)  
9 37306 Sodium valproate 200mg/5ml Oral solution (Sterwin Medicines)  
10 37611 Epival CR 300mg tablets (Chanelle Medical UK Ltd)  
11 38507 Epilim Chronosphere MR 100mg granules sachets (Sanofi)  
12 38508 Epilim Chronosphere MR 250mg granules sachets (Sanofi)  
13 38939 Epilim 200 gastro-resistant tablets (Sanofi)  
14 38949 Epilim 500 gastro-resistant tablets (Sanofi)  
15 39039 Sodium valproate 200mg modified-release tablets  
16 39276 Sodium valproate with valproic acid 250mg modified release granules  
17 39279 Epilim Chronosphere MR 500mg granules sachets (Sanofi)  
18 39427 Sodium valproate with valproic acid 750mg modified release granules  
19 39452 Sodium valproate with valproic acid 500mg modified release granules  
20 39550 Epilim Chronosphere MR 750mg granules sachets (Sanofi)  
21 39930 Epilim Chronosphere MR 50mg granules sachets (Sanofi)  
22 40070 Sodium valproate 300mg/3ml solution for injection ampoules  
23 40395 Sodium valproate 100mg tablets (Mylan Ltd)  
24 40400 Sodium valproate 500mg Gastro-resistant tablet (C P Pharmaceuticals Ltd)  
25 41137 Sodium valproate with valproic acid 100mg modified release granules  
26 42038 Epilim Chronosphere MR 1000mg granules sachets (Sanofi)  
27 42090 Sodium valproate 200mg/5ml oral solution sugar free (Zentiva)  
28 43178 Sodium valproate with valproic acid 1000mg modified release granules  
29 43387 Sodium valproate with valproic acid 50mg modified release granules  
30 43648 Sodium valproate oral solution  
31 43742 Sodium valproate 1g/10ml solution for injection ampoules  
32 44472 Sodium valproate 100mg modified-release granules sachets sugar free  
33 44718 Sodium valproate 750mg modified-release granules sachets sugar free  
34 44903 Sodium valproate 500mg gastro-resistant tablets (Zentiva)  
35 45106 Sodium valproate 250mg modified-release granules sachets sugar free  
36 45344 Sodium valproate 200mg/5ml Oral solution (Hillcross Pharmaceuticals Ltd)  
37 45419 Sodium valproate 50mg modified-release granules sachets sugar free  
38 46774 Sodium valproate 500mg gastro-resistant tablets (Teva UK Ltd)  
39 49923 Epilim Chrono 200 tablets (Lexon (UK) Ltd)  
40 51751 Sodium valproate 200mg gastro-resistant tablets (Wockhardt UK Ltd)  
41 53195 Epilim Chrono 200 tablets (DE Pharmaceuticals)  
42 53197 Sodium valproate 300mg modified-release tablets (Sigma Pharmaceuticals Plc)  
43 53501 Epilim Chrono 500 tablets (Lexon (UK) Ltd)  
44 53524 Epilim Chrono 300 tablets (DE Pharmaceuticals)  
45 55006 Sodium valproate 500mg modified-release tablets (Alliance Healthcare (Distribu  
46 56076 Sodium valproate 500mg/5ml oral suspension  
47 56136 Epilim Chrono 300 tablets (Waymade Healthcare Plc)  
48 60102 Sodium valproate 500mg modified-release tablets (J M McGill Ltd)  
49 60332 Sodium valproate 200mg/5ml oral solution sugar free (Wockhardt UK Ltd)  
50 62637 Sodium valproate 200mg gastro-resistant tablets (Actavis UK Ltd)



1  
2 63685 Epilim Chrono 500 tablets (DE Pharmaceuticals)  
3 36634 Episenta 1000mg modified-release granules sachets (Desitin Pharma Ltd)  
4 37584 Episenta 500mg modified-release granules sachets (Desitin Pharma Ltd)  
5 37970 Stiripentol 250mg oral powder sachets  
6 42491 Stiripentol 250mg capsules  
7 43836 Stiripentol 500mg capsules  
8 44400 Stiripentol 500mg oral powder sachets  
9 32200 Sultiame 200mg tablets  
10 37633 Sultiame 50mg tablets  
11 35987 Ospolot fc 50mg Tablet (IDIS World Medicines)  
12 10311 Thiopental 500mg powder for solution for injection vials  
13 13825 Tiagabine 5mg tablets  
14 13828 Tiagabine 15mg tablets  
15 16442 Tiagabine 10mg tablets  
16 18737 Gabitril 5mg Tablet (Sanofi-Synthelabo Ltd)  
17 20859 Gabitril 10mg Tablet (Sanofi-Synthelabo Ltd)  
18 24264 Gabitril 15mg tablets (Teva UK Ltd)  
19 25244 Gabitril 10mg tablets (Teva UK Ltd)  
20 26318 Gabitril 15mg Tablet (Sanofi-Synthelabo Ltd)  
21 32973 Gabitril 5mg tablets (Teva UK Ltd)  
22 795 Topiramate 15mg capsules  
23 5830 Topiramate 50mg capsules  
24 5874 Topiramate 25mg capsules  
25 6820 Topiramate 100mg tablets  
26 7073 Topiramate 50mg tablets  
27 7108 Topiramate 200mg tablets  
28 9823 Topamax 25mg tablets (Janssen-Cilag Ltd)  
29 11237 Topiramate 25mg tablets  
30 12821 Topamax 15mg sprinkle capsules (Janssen-Cilag Ltd)  
31 13608 Topamax 50mg tablets (Janssen-Cilag Ltd)  
32 13890 Topamax 200mg tablets (Janssen-Cilag Ltd)  
33 15851 Topamax 100mg tablets (Janssen-Cilag Ltd)  
34 16262 Topamax 25mg sprinkle capsules (Janssen-Cilag Ltd)  
35 18077 Topamax 50mg sprinkle capsules (Janssen-Cilag Ltd)  
36 44719 Topiramate 25mg/5ml oral suspension  
37 46572 Topiramate 50mg/5ml oral suspension  
38 51839 Topamax 25mg sprinkle capsules (Mawdsley-Brooks & Company Ltd)  
39 52751 Topiramate 5mg/5ml oral solution  
40 53779 Topiramate 25mg capsules (Sandoz Ltd)  
41 53780 Topiramate 25mg tablets (Sandoz Ltd)  
42 54245 Topiramate 25mg capsules (A A H Pharmaceuticals Ltd)  
43 55649 Topiramate 15mg capsules (A A H Pharmaceuticals Ltd)  
44 57670 Topiramate 50mg capsules (Sandoz Ltd)  
45 58019 Topiramate 25mg tablets (Teva UK Ltd)  
46 58137 Topiramate 100mg/5ml oral solution  
47 59051 Topiramate 50mg tablets (Accord Healthcare Ltd)  
48 59058 Topiramate 20mg/5ml oral suspension  
49 60156 Topiramate 25mg capsules (Actavis UK Ltd)  
50 60878 Topiramate 15mg/5ml oral solution  
51 61198 Topiramate 15mg/5ml oral suspension  
52  
53  
54  
55  
56  
57  
58  
59  
60



1 61630 Topiramate 100mg tablets (Teva UK Ltd)  
2 61770 Topiramate 50mg capsules (Teva UK Ltd)  
3 62198 Topiramate 50mg capsules (A A H Pharmaceuticals Ltd)  
4 62306 Topiramate 25mg capsules (Teva UK Ltd)  
5 63113 Topiramate 25mg capsules (Phoenix Healthcare Distribution Ltd)  
6 63250 Topiramate 25mg tablets (Accord Healthcare Ltd)  
7 63504 Topiramate 25mg tablets (Actavis UK Ltd)  
8 63545 Topiramate 200mg tablets (Actavis UK Ltd)  
9 64773 Topiramate 30mg/5ml oral solution  
10 53211 Valproic acid 500mg/5ml oral solution  
11 5617 Convulex 300mg gastro-resistant capsules (Pfizer Ltd)  
12 5997 Convulex 150mg gastro-resistant capsules (Pfizer Ltd)  
13 15650 Valproic acid 300mg gastro-resistant capsules  
14 16021 Valproic acid 500mg gastro-resistant capsules  
15 18614 Valproic acid 150mg gastro-resistant capsules  
16 18886 Convulex 500mg gastro-resistant capsules (Pfizer Ltd)  
17 2821 Vigabatrin 500mg tablets  
18 4585 Vigabatrin 500mg oral powder sachets sugar free  
19 10705 Sabril 500mg tablets (Sanofi)  
20 16782 Vigabatrin 125mg capsules  
21 17990 Sabril 500mg oral powder sachets (Sanofi)  
22 59144 Vigabatrin 500mg/5ml oral solution  
23 11873 Zonisamide 25mg capsules  
24 15338 Zonisamide 100mg capsules  
25 19500 Zonisamide 50mg capsules  
26 24176 Zonegran 50mg capsules (Eisai Ltd)  
27 24177 Zonegran 100mg capsules (Eisai Ltd)  
28 27760 Zonegran 25mg capsules (Eisai Ltd)  
29 47143 Zonisamide 50mg/5ml oral suspension  
30 54873 Zonisamide 50mg/5ml oral solution  
31 54759 Clobazam 5mg/5ml oral suspension sugar free  
32 9979 Gabapentin 600mg tablets and Gabapentin 300mg capsules  
33 50442 Phenobarbital sodium 50mg/5ml oral solution  
34 52680 Clobazam 7.5mg/5ml oral solution  
35 54571 Levetiracetam 1g granules sachets sugar free  
36 54828 Sodium valproate 600mg/5ml oral solution  
37 54984 Phenytoin 300mg/5ml oral solution  
38 55253 Levetiracetam 500mg granules sachets sugar free  
39 56326 Desitrend 500mg granules sachets (Desitin Pharma Ltd)  
40 57643 Zonisamide 50mg/5ml oral suspension  
41 58179 Levetiracetam 250mg/5ml oral solution  
42 58527 Desitrend 1000mg granules sachets (Desitin Pharma Ltd)  
43 60598 Phenobarbital sodium 15mg/5ml oral suspension  
44 61015 Clonazepam 500microgram oral lyophilisates sugar free  
45 61760 Vimpat 200mg/20ml solution for infusion vials (UCB Pharma Ltd)  
46 63271 Phenytoin 300mg/5ml oral solution (Special Order)  
47 64693 Clonazepam 2.5mg/ml drops  
48 65046 Lamotrigine 15mg/5ml oral suspension  
49 51583 Primidone 100mg/5ml oral suspension  
50 57898 Carbamazepine 100mg/5ml oral suspension

- 1
- 2 55019 Phenobarbital 250mg/5ml oral suspension
- 3 58532 Phenobarbital 34mg/5ml oral suspension
- 4 60648 Phenobarbital 15mg/5ml oral suspension
- 5 49429 Paraldehyde 50% in Sunflower oil rectal solution
- 6 59375 Paraldehyde 50% in Olive oil rectal solution
- 7 61290 Midazolam 2.5mg/0.25ml oromucosal solution pre-filled oral syringes
- 8 63631 Paraldehyde 50% in Arachis oil rectal solution
- 9 54609 Gabapentin 50mg/ml oral solution sugar free
- 10 58162 Gabapentin 600mg/5ml oral solution
- 11 59196 Gabapentin 400mg/5ml oral solution
- 12 63375 Gabapentin 200mg/5ml oral solution
- 13 66495 Brivaracetam 50mg tablets
- 14 57874 Topiramate 12.5mg/5ml oral suspension
- 15 60432 Topiramate 10mg/5ml oral solution
- 16
- 17
- 18
- 19
- 20
- 21
- 22
- 23
- 24
- 25
- 26
- 27
- 28
- 29
- 30
- 31
- 32
- 33
- 34
- 35
- 36
- 37
- 38
- 39
- 40
- 41
- 42
- 43
- 44
- 45
- 46
- 47
- 48
- 49
- 50
- 51
- 52
- 53
- 54
- 55
- 56
- 57
- 58
- 59
- 60

**drugsubstance**

1  
2  
3 Pregabalin  
4 Pregabalin  
5 Pregabalin  
6 Pregabalin  
7 Pregabalin  
8 Pregabalin  
9 Pregabalin  
10 Pregabalin  
11 Pregabalin  
12 Pregabalin  
13 Pregabalin  
14 Pregabalin  
15 Pregabalin  
16 Pregabalin  
17 Pregabalin  
18 Pregabalin  
19 Pregabalin  
20 Pregabalin  
21 Pregabalin  
22 Pregabalin  
23 Pregabalin  
24 Pregabalin  
25 Pregabalin  
26 Pregabalin  
27 Pregabalin  
28 Pregabalin  
29 Pregabalin  
30 Pregabalin  
31 Pregabalin  
32 Pregabalin  
33 Pregabalin  
34 Pregabalin  
35 Pregabalin  
36 Pregabalin  
37 Pregabalin  
38 Pregabalin  
39 Pregabalin  
40 Pregabalin  
41 Pregabalin  
42 Pregabalin  
43 Pregabalin  
44 Pregabalin  
45 Pregabalin  
46 Pregabalin  
47 Pregabalin  
48 Pregabalin  
49 Pregabalin  
50 Pregabalin  
51 Pregabalin  
52 Pregabalin  
53 Pregabalin  
54 Pregabalin  
55 Pregabalin  
56 Pregabalin  
57 Pregabalin  
58 Pregabalin  
59 Pregabalin  
60 Pregabalin

For peer review only

- 1
- 2 Pregabalin
- 3 Beclamide
- 4 Beclamide
- 5 Carbamazepine
- 6 Carbamazepine
- 7 Carbamazepine
- 8 Carbamazepine
- 9 Carbamazepine
- 10 Carbamazepine
- 11 Carbamazepine
- 12 Carbamazepine
- 13 Carbamazepine
- 14 Carbamazepine
- 15 Carbamazepine
- 16 Carbamazepine
- 17 Carbamazepine
- 18 Carbamazepine
- 19 Carbamazepine
- 20 Carbamazepine
- 21 Carbamazepine
- 22 Carbamazepine
- 23 Carbamazepine
- 24 Carbamazepine
- 25 Carbamazepine
- 26 Carbamazepine
- 27 Carbamazepine
- 28 Carbamazepine
- 29 Carbamazepine
- 30 Carbamazepine
- 31 Carbamazepine
- 32 Carbamazepine
- 33 Carbamazepine
- 34 Carbamazepine
- 35 Carbamazepine
- 36 Carbamazepine
- 37 Carbamazepine
- 38 Carbamazepine
- 39 Carbamazepine
- 40 Carbamazepine
- 41 Carbamazepine
- 42 Carbamazepine
- 43 Carbamazepine
- 44 Carbamazepine
- 45 Carbamazepine
- 46 Carbamazepine
- 47 Carbamazepine
- 48 Carbamazepine
- 49 Carbamazepine
- 50 Carbamazepine
- 51 Carbamazepine
- 52 Carbamazepine
- 53 Carbamazepine
- 54 Carbamazepine
- 55 Carbamazepine
- 56 Carbamazepine
- 57 Carbamazepine
- 58 Carbamazepine
- 59 Carbamazepine
- 60 Carbamazepine

For peer review only

1 Carbamazepine  
2 Carbamazepine  
3 Carbamazepine  
4 Carbamazepine  
5 Carbamazepine  
6 Carbamazepine  
7 Carbamazepine  
8 Carbamazepine  
9 Carbamazepine  
10 Carbamazepine  
11 Carbamazepine  
12 Carbamazepine  
13 Carbamazepine  
14 Carbamazepine  
15 Carbamazepine  
16 Carbamazepine  
17 Carbamazepine  
18 Carbamazepine  
19 Carbamazepine  
20 Carbamazepine  
21 Carbamazepine  
22 Carbamazepine  
23 Carbamazepine  
24 Carbamazepine  
25 Carbamazepine  
26 Carbamazepine  
27 Carbamazepine  
28 Carbamazepine  
29 Carbamazepine  
30 Carbamazepine  
31 Carbamazepine  
32 Carbamazepine  
33 Carbamazepine  
34 Carbamazepine  
35 Carbamazepine  
36 Carbamazepine  
37 Carbamazepine  
38 Carbamazepine  
39 Carbamazepine  
40 Carbamazepine  
41 Carbamazepine  
42 Carbamazepine  
43 Carbamazepine  
44 Carbamazepine  
45 Carbamazepine  
46 Carbamazepine  
47 Clobazam  
48 Clobazam  
49 Clobazam  
50 Clobazam  
51 Clobazam  
52 Clobazam  
53 Clobazam  
54 Clobazam  
55 Clobazam  
56 Clobazam  
57 Clobazam  
58 Clobazam  
59 Clobazam  
60 Clobazam

For peer review only

- 1
- 2 Clobazam
- 3 Clobazam
- 4 Clobazam
- 5 Clobazam
- 6 Clobazam
- 7 Clobazam
- 8 Clobazam
- 9 Clobazam
- 10 Clobazam
- 11 Clobazam
- 12 Clobazam
- 13 Clobazam
- 14 Clobazam
- 15 Clomethiazole Edisilate
- 16 Clomethiazole Edisilate
- 17 Clonazepam
- 18 Clonazepam
- 19 Clonazepam
- 20 Clonazepam
- 21 Clonazepam
- 22 Clonazepam
- 23 Clonazepam
- 24 Clonazepam
- 25 Clonazepam
- 26 Clonazepam
- 27 Clonazepam
- 28 Clonazepam
- 29 Clonazepam
- 30 Clonazepam
- 31 Clonazepam
- 32 Clonazepam
- 33 Clonazepam
- 34 Clonazepam
- 35 Clonazepam
- 36 Clonazepam
- 37 Clonazepam
- 38 Clonazepam
- 39 Clonazepam
- 40 Clonazepam
- 41 Clonazepam
- 42 Clonazepam
- 43 Clonazepam
- 44 Clonazepam
- 45 Clonazepam
- 46 Clonazepam
- 47 Clonazepam
- 48 Clonazepam
- 49 Clonidine hydrochloride
- 50 Diazepam
- 51 Diazepam
- 52 Diazepam
- 53 Diazepam
- 54 Diazepam
- 55 Diazepam
- 56 Diazepam
- 57 Diazepam
- 58 Diazepam
- 59 Diazepam
- 60 Diazepam

For peer review only



1 Diazepam  
2 Diazepam  
3 Diazepam  
4 Diazepam  
5 Diazepam  
6 Diazepam  
7 Diazepam  
8 Diazepam  
9 Diazepam  
10 Diazepam  
11 Diazepam  
12 Diazepam  
13 Diazepam  
14 Diazepam  
15 Diazepam  
16 Diazepam  
17 Diazepam  
18 Diazepam  
19 Diazepam  
20 Diazepam  
21 Diazepam  
22 Diazepam  
23 Diazepam  
24 Diazepam  
25 Diazepam  
26 Diazepam  
27 Diazepam  
28 Diazepam  
29 Diazepam  
30 Diazepam  
31 Diazepam  
32 Diazepam  
33 Diazepam  
34 Diazepam  
35 Diazepam  
36 Diazepam  
37 Diazepam  
38 Diazepam  
39 Diazepam  
40 Diazepam  
41 Diazepam  
42 Diazepam  
43 Diazepam  
44 Diazepam  
45 Diazepam  
46 Diazepam  
47 Diazepam  
48 Diazepam  
49 Diazepam  
50 Diazepam  
51 Diazepam  
52 Diazepam  
53 Diazepam  
54 Diazepam  
55 Diazepam  
56 Diazepam  
57 Diazepam  
58 Diazepam  
59 Diazepam  
60 Diazepam

For peer review only

- 1 Diazepam
- 2 Diazepam
- 3 Diazepam
- 4 Diazepam
- 5 Diazepam
- 6 Diazepam
- 7 Diazepam
- 8 Diazepam
- 9 Diazepam
- 10 Diazepam
- 11 Diazepam
- 12 Diazepam
- 13 Diazepam
- 14 Diazepam
- 15 Eslicarbazepine Acetate
- 16 Eslicarbazepine Acetate
- 17 Ethosuximide
- 18 Ethosuximide
- 19 Ethosuximide
- 20 Ethosuximide
- 21 Ethosuximide
- 22 Ethosuximide
- 23 Ethosuximide
- 24 Ethosuximide
- 25 Ethosuximide
- 26 Ethosuximide
- 27 Felbamate
- 28 FosPhenytoin
- 29 FosPhenytoin
- 30 Gabapentin
- 31 Gabapentin
- 32 Gabapentin
- 33 Gabapentin
- 34 Gabapentin
- 35 Gabapentin
- 36 Gabapentin
- 37 Gabapentin
- 38 Gabapentin
- 39 Gabapentin
- 40 Gabapentin
- 41 Gabapentin
- 42 Gabapentin
- 43 Gabapentin
- 44 Gabapentin
- 45 Gabapentin
- 46 Gabapentin
- 47 Gabapentin
- 48 Gabapentin
- 49 Gabapentin
- 50 Gabapentin
- 51 Gabapentin
- 52 Gabapentin
- 53 Gabapentin
- 54 Gabapentin
- 55 Gabapentin
- 56 Gabapentin
- 57 Gabapentin
- 58 Gabapentin
- 59 Gabapentin
- 60 Gabapentin

For peer review only

1 Gabapentin  
2 Gabapentin  
3 Gabapentin  
4 Gabapentin  
5 Gabapentin  
6 Gabapentin  
7 Gabapentin  
8 Gabapentin  
9 Gabapentin  
10 Gabapentin  
11 Gabapentin  
12 Gabapentin  
13 Gabapentin  
14 Gabapentin  
15 Gabapentin  
16 Gabapentin  
17 Gabapentin  
18 Gabapentin  
19 Gabapentin  
20 Gabapentin  
21 Lacosamide  
22 Lacosamide  
23 Lacosamide  
24 Lacosamide  
25 Lacosamide  
26 Lacosamide  
27 Lacosamide  
28 Lacosamide  
29 Lacosamide  
30 Lacosamide  
31 Lacosamide  
32 Lacosamide  
33 Lacosamide  
34 Lacosamide  
35 Lacosamide  
36 Lamotrigine  
37 Lamotrigine  
38 Lamotrigine  
39 Lamotrigine  
40 Lamotrigine  
41 Lamotrigine  
42 Lamotrigine  
43 Lamotrigine  
44 Lamotrigine  
45 Lamotrigine  
46 Lamotrigine  
47 Lamotrigine  
48 Lamotrigine  
49 Lamotrigine  
50 Lamotrigine  
51 Lamotrigine  
52 Lamotrigine  
53 Lamotrigine  
54 Lamotrigine  
55 Lamotrigine  
56 Lamotrigine  
57 Lamotrigine  
58 Lamotrigine  
59 Lamotrigine  
60 Lamotrigine

For peer review only

- 1
- 2 Lamotrigine
- 3 Lamotrigine
- 4 Lamotrigine
- 5 Lamotrigine
- 6 Lamotrigine
- 7 Lamotrigine
- 8 Lamotrigine
- 9 Lamotrigine
- 10 Lamotrigine
- 11 Lamotrigine
- 12 Lamotrigine
- 13 Lamotrigine
- 14 Lamotrigine
- 15 Lamotrigine
- 16 Lamotrigine
- 17 Lamotrigine
- 18 Lamotrigine
- 19 Lamotrigine
- 20 Lamotrigine
- 21 Lamotrigine
- 22 Lamotrigine
- 23 Lamotrigine
- 24 Lamotrigine
- 25 Lamotrigine
- 26 Lamotrigine
- 27 Lamotrigine
- 28 Lamotrigine
- 29 Lamotrigine
- 30 Lamotrigine
- 31 Lamotrigine
- 32 Lamotrigine
- 33 Lamotrigine
- 34 Lamotrigine
- 35 Lamotrigine
- 36 Lamotrigine
- 37 Lamotrigine
- 38 Lamotrigine
- 39 Lamotrigine
- 40 Lamotrigine
- 41 Lamotrigine
- 42 Lamotrigine
- 43 Lamotrigine
- 44 Lamotrigine
- 45 Lamotrigine
- 46 Levetiracetam
- 47 Levetiracetam
- 48 Levetiracetam
- 49 Levetiracetam
- 50 Levetiracetam
- 51 Levetiracetam
- 52 Levetiracetam
- 53 Levetiracetam
- 54 Levetiracetam
- 55 Levetiracetam
- 56 Levetiracetam
- 57 Levetiracetam
- 58 Levetiracetam
- 59 Levetiracetam
- 60 Levetiracetam

For peer review only

1 Levetiracetam  
2 Levetiracetam  
3 Levetiracetam  
4 Levetiracetam  
5 Levetiracetam  
6 Levetiracetam  
7 Levetiracetam  
8 Levetiracetam  
9 Levetiracetam  
10 Levetiracetam  
11 Levetiracetam  
12 Levetiracetam  
13 Levetiracetam  
14 Levetiracetam  
15 Levetiracetam  
16 Levetiracetam  
17 Levetiracetam  
18 Levetiracetam  
19 Levetiracetam  
20 Levetiracetam  
21 Levetiracetam  
22 Levetiracetam  
23 Levetiracetam  
24 Levetiracetam  
25 Levetiracetam  
26 Levetiracetam  
27 Levetiracetam  
28 Levetiracetam  
29 Levetiracetam  
30 Levetiracetam  
31 Levetiracetam  
32 Levetiracetam  
33 Levetiracetam  
34 Levetiracetam  
35 Lorazepam  
36 Lorazepam  
37 Mesuximide  
38 Midazolam  
39 Midazolam  
40 Midazolam  
41 Midazolam  
42 Midazolam  
43 Midazolam  
44 Midazolam  
45 Midazolam  
46 Midazolam  
47 Midazolam  
48 Midazolam  
49 Midazolam  
50 Midazolam  
51 Midazolam  
52 Midazolam  
53 Midazolam  
54 Midazolam  
55 Midazolam  
56 Midazolam  
57 Midazolam  
58 Midazolam  
59 Midazolam Maleate  
60 Midazolam/Midazolam

- 1
- 2 Olive oil/Paraldehyde
- 3 Oxcarbazepine
- 4 Oxcarbazepine
- 5 Oxcarbazepine
- 6 Oxcarbazepine
- 7 Oxcarbazepine
- 8 Oxcarbazepine
- 9 Oxcarbazepine
- 10 Oxcarbazepine
- 11 Oxcarbazepine
- 12 Oxcarbazepine
- 13 Paraldehyde
- 14 Paraldehyde
- 15 Paraldehyde
- 16 Perampanel
- 17 Perampanel
- 18 Perampanel
- 19 Perampanel
- 20 Perampanel
- 21 Perampanel
- 22 Perampanel
- 23 Perampanel
- 24 Perampanel
- 25 Perampanel
- 26 Perampanel
- 27 Perampanel
- 28 Perampanel
- 29 Perampanel
- 30 Perampanel
- 31 Phenobarbital
- 32 Phenobarbital
- 33 Phenobarbital
- 34 Phenobarbital
- 35 Phenobarbital
- 36 Phenobarbital
- 37 Phenobarbital
- 38 Phenobarbital
- 39 Phenobarbital
- 40 Phenobarbital
- 41 Phenobarbital
- 42 Phenobarbital
- 43 Phenobarbital
- 44 Phenobarbital
- 45 Phenobarbital
- 46 Phenobarbital
- 47 Phenobarbital
- 48 Phenobarbital
- 49 Phenobarbital
- 50 Phenobarbital
- 51 Phenobarbital
- 52 Phenobarbital
- 53 Phenobarbital
- 54 Phenobarbital
- 55 Phenobarbital
- 56 Phenobarbital
- 57 Phenobarbital
- 58 Phenobarbital
- 59 Phenobarbital
- 60 Phenobarbital

For peer review only



1  
2 Phenobarbital  
3 Phenobarbital  
4 Phenobarbital  
5 Phenobarbital  
6 Phenobarbital  
7 Phenobarbital  
8 Phenobarbital  
9 Phenobarbital  
10 Phenobarbital  
11 Phenobarbital  
12 Phenobarbital  
13 Phenobarbital  
14 Phenobarbital  
15 Phenobarbital  
16 Phenobarbital  
17 Phenobarbital  
18 Phenytoin  
19 Phenytoin  
20 Phenytoin  
21 Phenytoin  
22 Phenytoin  
23 Phenytoin  
24 Phenytoin  
25 Phenytoin  
26 Phenytoin  
27 Phenytoin  
28 Phenytoin  
29 Phenytoin  
30 Phenytoin  
31 Phenytoin  
32 Phenytoin  
33 Phenytoin  
34 Phenytoin  
35 Phenytoin  
36 Phenytoin  
37 Phenytoin  
38 Phenytoin  
39 Phenytoin  
40 Phenytoin  
41 Phenytoin  
42 Phenytoin  
43 Phenytoin  
44 Phenytoin  
45 Phenytoin  
46 Phenytoin  
47 Phenytoin  
48 Phenytoin  
49 Phenytoin  
50 Phenytoin  
51 Phenytoin  
52 Phenytoin  
53 Phenytoin  
54 Phenytoin  
55 Phenytoin  
56 Phenytoin  
57 Phenytoin  
58 Phenytoin  
59 Phenytoin  
60 Phenytoin

For peer review only

- 1
- 2 Phenytoin
- 3 Phenytoin
- 4 Phenytoin
- 5 Phenytoin
- 6 Phenytoin
- 7 Phenytoin
- 8 Phenytoin
- 9 Phenytoin
- 10 Phenytoin
- 11 Phenytoin
- 12 Phenytoin
- 13 Phenytoin
- 14 Phenytoin
- 15 Phenytoin
- 16 Phenytoin
- 17 Phenytoin
- 18 Phenytoin
- 19 Phenytoin
- 20 Potassium bromide/Ammonium bicarbonate/Liquorice liquid extract/Anise oil/Ethanol 90%/Chloroforr
- 21 Primidone
- 22 Primidone
- 23 Primidone
- 24 Primidone
- 25 Primidone
- 26 Primidone
- 27 Primidone
- 28 Primidone
- 29 Primidone
- 30 Primidone
- 31 Primidone
- 32 Primidone
- 33 Primidone
- 34 Primidone
- 35 Primidone
- 36 Primidone
- 37 Primidone
- 38 Primidone
- 39 Primidone
- 40 Primidone
- 41 Primidone
- 42 Primidone
- 43 Primidone
- 44 Primidone
- 45 Primidone
- 46 Primidone
- 47 Primidone
- 48 Primidone
- 49 Pyridoxine hydrochloride
- 50 Pyridoxine hydrochloride
- 51 Pyridoxine hydrochloride
- 52 Pyridoxine hydrochloride
- 53 Pyridoxine hydrochloride
- 54 Pyridoxine hydrochloride
- 55 Pyridoxine Hydrochloride
- 56 Pyridoxine hydrochloride
- 57 Pyridoxine hydrochloride
- 58 Pyridoxine hydrochloride
- 59 Pyridoxine hydrochloride
- 60 Retigabine

For peer review only

1 Retigabine  
2 Retigabine  
3 Retigabine  
4 Retigabine  
5 Retigabine  
6 Retigabine  
7 Retigabine  
8 Retigabine  
9 Retigabine  
10 Retigabine  
11 Retigabine  
12 Retigabine  
13 Retigabine  
14 Rufinamide  
15 Rufinamide  
16 Rufinamide  
17 Rufinamide  
18 Rufinamide  
19 Rufinamide  
20 Rufinamide  
21 Rufinamide  
22 Sodium valproate  
23 Sodium valproate  
24 Sodium valproate  
25 Sodium valproate  
26 Sodium valproate  
27 Sodium valproate  
28 Sodium valproate  
29 Sodium valproate  
30 Sodium valproate  
31 Sodium valproate  
32 Sodium valproate  
33 Sodium valproate  
34 Sodium valproate  
35 Sodium valproate  
36 Sodium valproate  
37 Sodium valproate  
38 Sodium valproate  
39 Sodium valproate  
40 Sodium valproate  
41 Sodium valproate  
42 Sodium valproate  
43 Sodium valproate  
44 Sodium valproate  
45 Sodium valproate  
46 Sodium valproate  
47 Sodium valproate  
48 Sodium valproate  
49 Sodium valproate  
50 Sodium valproate  
51 Sodium valproate  
52 Sodium valproate  
53 Sodium valproate  
54 Sodium valproate  
55 Sodium valproate  
56 Sodium valproate  
57 Sodium valproate  
58 Sodium valproate  
59 Sodium valproate  
60 Sodium valproate

- 1
- 2 Sodium valproate
- 3 Sodium valproate
- 4 Sodium valproate
- 5 Sodium valproate
- 6 Sodium valproate
- 7 Sodium valproate
- 8 Sodium valproate
- 9 Sodium valproate
- 10 Sodium valproate
- 11 Sodium valproate
- 12 Sodium valproate
- 13 Sodium valproate
- 14 Sodium valproate
- 15 Sodium valproate
- 16 Sodium valproate
- 17 Sodium valproate
- 18 Sodium valproate
- 19 Sodium valproate
- 20 Sodium valproate
- 21 Sodium valproate
- 22 Sodium valproate
- 23 Sodium valproate
- 24 Sodium valproate
- 25 Sodium valproate
- 26 Sodium valproate
- 27 Sodium valproate
- 28 Sodium valproate
- 29 Sodium valproate
- 30 Sodium valproate
- 31 Sodium valproate
- 32 Sodium valproate
- 33 Sodium valproate
- 34 Sodium valproate
- 35 Sodium valproate
- 36 Sodium valproate
- 37 Sodium valproate
- 38 Sodium valproate
- 39 Sodium valproate
- 40 Sodium valproate
- 41 Sodium valproate
- 42 Sodium valproate
- 43 Sodium valproate
- 44 Sodium valproate
- 45 Sodium valproate
- 46 Sodium valproate
- 47 Sodium valproate
- 48 Sodium valproate
- 49 Sodium valproate
- 50 Sodium valproate
- 51 Sodium valproate
- 52 Sodium valproate
- 53 Sodium valproate
- 54 Sodium valproate
- 55 Sodium valproate
- 56 Sodium valproate
- 57 Sodium valproate
- 58 Sodium valproate
- 59 Sodium valproate
- 60 Sodium valproate

For peer review only

1  
2 Sodium valproate  
3 Sodium valproate  
4 Sodium valproate  
5 Stiripentol  
6 Stiripentol  
7 Stiripentol  
8 Stiripentol  
9 Stiripentol  
10 Sultiame  
11 Sultiame  
12 Sultiame  
13 Sultiame  
14 Thiopental sodium  
15 Tiagabine  
16 Tiagabine  
17 Tiagabine  
18 Tiagabine  
19 Tiagabine  
20 Tiagabine  
21 Tiagabine  
22 Tiagabine  
23 Tiagabine  
24 Tiagabine  
25 Tiagabine  
26 Topiramate  
27 Topiramate  
28 Topiramate  
29 Topiramate  
30 Topiramate  
31 Topiramate  
32 Topiramate  
33 Topiramate  
34 Topiramate  
35 Topiramate  
36 Topiramate  
37 Topiramate  
38 Topiramate  
39 Topiramate  
40 Topiramate  
41 Topiramate  
42 Topiramate  
43 Topiramate  
44 Topiramate  
45 Topiramate  
46 Topiramate  
47 Topiramate  
48 Topiramate  
49 Topiramate  
50 Topiramate  
51 Topiramate  
52 Topiramate  
53 Topiramate  
54 Topiramate  
55 Topiramate  
56 Topiramate  
57 Topiramate  
58 Topiramate  
59 Topiramate  
60 Topiramate

1  
2 Topiramate  
3 Topiramate  
4 Topiramate  
5 Topiramate  
6 Topiramate  
7 Topiramate  
8 Topiramate  
9 Topiramate  
10 Topiramate  
11 Topiramate  
12 Topiramate  
13 Valproate semisodium  
14 Valproic acid  
15 Valproic acid  
16 Valproic acid  
17 Valproic acid  
18 Valproic acid  
19 Valproic acid  
20 Valproic acid  
21 Vigabatrin  
22 Vigabatrin  
23 Vigabatrin  
24 Vigabatrin  
25 Vigabatrin  
26 Vigabatrin  
27 Vigabatrin  
28 Zonisamide  
29 Zonisamide  
30 Zonisamide  
31 Zonisamide  
32 Zonisamide  
33 Zonisamide  
34 Zonisamide  
35 Zonisamide  
36 Zonisamide  
37 Zonisamide  
38 Clobazam  
39 Gabapentin  
40 Phenobarbital  
41 Clobazam  
42 Clobazam  
43 Levetiracetam  
44 Sodium valproate  
45 Phenytoin  
46 Levetiracetam  
47 Levetiracetam  
48 Levetiracetam  
49 Zonisamide  
50 Levetiracetam  
51 Levetiracetam  
52 Phenobarbital  
53 Clonazepam  
54 Clonazepam  
55 Lacosamide  
56 Phenytoin  
57 Clonazepam  
58 Lamotrigine  
59 Primidone  
60 Carbamazepine

For peer review only



1  
2 Phenobarbital  
3 Phenobarbital  
4 Phenobarbital  
5 Paraldehyde  
6 Paraldehyde  
7 Paraldehyde  
8 Midazolam  
9 Paraldehyde  
10 Gabapentin  
11 Gabapentin  
12 Gabapentin  
13 Gabapentin  
14 Gabapentin  
15 Brivaracetam  
16 Topiramate  
17 Topiramate  
18  
19  
20  
21  
22  
23  
24  
25  
26  
27  
28  
29  
30  
31  
32  
33  
34  
35  
36  
37  
38  
39  
40  
41  
42  
43  
44  
45  
46  
47  
48  
49  
50  
51  
52  
53  
54  
55  
56  
57  
58  
59  
60

For peer review only

1  
2  
3  
4  
5  
6  
7  
8  
9  
10  
11  
12  
13  
14  
15  
16  
17  
18  
19  
20  
21  
22  
23  
24  
25  
26  
27  
28  
29  
30  
31  
32  
33  
34  
35  
36  
37  
38  
39  
40  
41  
42  
43  
44  
45  
46  
47  
48  
49  
50  
51  
52  
53  
54  
55  
56  
57  
58  
59  
60

For peer review only

1  
2  
3  
4  
5  
6  
7  
8  
9  
10  
11  
12  
13  
14  
15  
16  
17  
18  
19  
20  
21  
22  
23  
24  
25  
26  
27  
28  
29  
30  
31  
32  
33  
34  
35  
36  
37  
38  
39  
40  
41  
42  
43  
44  
45  
46  
47  
48  
49  
50  
51  
52  
53  
54  
55  
56  
57  
58  
59  
60

For peer review only

1  
2  
3  
4  
5  
6  
7  
8  
9  
10  
11  
12  
13  
14  
15  
16  
17  
18  
19  
20  
21  
22  
23  
24  
25  
26  
27  
28  
29  
30  
31  
32  
33  
34  
35  
36  
37  
38  
39  
40  
41  
42  
43  
44  
45  
46  
47  
48  
49  
50  
51  
52  
53  
54  
55  
56  
57  
58  
59  
60

For peer review only

1  
2  
3  
4  
5  
6  
7  
8  
9  
10  
11  
12  
13  
14  
15  
16  
17  
18  
19  
20  
21  
22  
23  
24  
25  
26  
27  
28  
29  
30  
31  
32  
33  
34  
35  
36  
37  
38  
39  
40  
41  
42  
43  
44  
45  
46  
47  
48  
49  
50  
51  
52  
53  
54  
55  
56  
57  
58  
59  
60

For peer review only

1  
2  
3  
4  
5  
6  
7  
8  
9  
10  
11  
12  
13  
14  
15  
16  
17  
18  
19  
20  
21  
22  
23  
24  
25  
26  
27  
28  
29  
30  
31  
32  
33  
34  
35  
36  
37  
38  
39  
40  
41  
42  
43  
44  
45  
46  
47  
48  
49  
50  
51  
52  
53  
54  
55  
56  
57  
58  
59  
60

For peer review only



1  
2  
3  
4  
5  
6  
7  
8  
9  
10  
11  
12  
13  
14  
15  
16  
17  
18  
19  
20  
21  
22  
23  
24  
25  
26  
27  
28  
29  
30  
31  
32  
33  
34  
35  
36  
37  
38  
39  
40  
41  
42  
43  
44  
45  
46  
47  
48  
49  
50  
51  
52  
53  
54  
55  
56  
57  
58  
59  
60

For peer review only

1  
2  
3  
4  
5  
6  
7  
8  
9  
10  
11  
12  
13  
14  
15  
16  
17  
18  
19  
20  
21  
22  
23  
24  
25  
26  
27  
28  
29  
30  
31  
32  
33  
34  
35  
36  
37  
38  
39  
40  
41  
42  
43  
44  
45  
46  
47  
48  
49  
50  
51  
52  
53  
54  
55  
56  
57  
58  
59  
60

For peer review only

1  
2  
3  
4  
5  
6  
7  
8  
9  
10  
11  
12  
13  
14  
15  
16  
17  
18  
19  
20  
21  
22  
23  
24  
25  
26  
27  
28  
29  
30  
31  
32  
33  
34  
35  
36  
37  
38  
39  
40  
41  
42  
43  
44  
45  
46  
47  
48  
49  
50  
51  
52  
53  
54  
55  
56  
57  
58  
59  
60

For peer review only

1  
2  
3  
4  
5  
6  
7  
8  
9  
10  
11  
12  
13  
14  
15  
16  
17  
18  
19  
20  
21  
22  
23  
24  
25  
26  
27  
28  
29  
30  
31  
32  
33  
34  
35  
36  
37  
38  
39  
40  
41  
42  
43  
44  
45  
46  
47  
48  
49  
50  
51  
52  
53  
54  
55  
56  
57  
58  
59  
60

For peer review only

1  
2  
3  
4  
5  
6  
7  
8  
9  
10  
11  
12  
13  
14  
15  
16  
17  
18  
19  
20  
21  
22  
23  
24  
25  
26  
27  
28  
29  
30  
31  
32  
33  
34  
35  
36  
37  
38  
39  
40  
41  
42  
43  
44  
45  
46  
47  
48  
49  
50  
51  
52  
53  
54  
55  
56  
57  
58  
59  
60

For peer review only

1  
2  
3  
4  
5  
6  
7  
8  
9  
10  
11  
12  
13  
14  
15  
16  
17  
18  
19  
20  
21  
22  
23  
24  
25  
26  
27  
28  
29  
30  
31  
32  
33  
34  
35  
36  
37  
38  
39  
40  
41  
42  
43  
44  
45  
46  
47  
48  
49  
50  
51  
52  
53  
54  
55  
56  
57  
58  
59  
60

For peer review only

1  
2  
3  
4  
5  
6  
7  
8  
9  
10  
11  
12  
13  
14  
15  
16  
17  
18  
19  
20  
21  
22  
23  
24  
25  
26  
27  
28  
29  
30  
31  
32  
33  
34  
35  
36  
37  
38  
39  
40  
41  
42  
43  
44  
45  
46  
47  
48  
49  
50  
51  
52  
53  
54  
55  
56  
57  
58  
59  
60

n

For peer review only



## STROBE Statement—checklist of items that should be included in reports of observational studies

|                           | Item No | Recommendation                                                                                                                                                                                                                                                                                                                                                                                                                                                         | Page No                         |
|---------------------------|---------|------------------------------------------------------------------------------------------------------------------------------------------------------------------------------------------------------------------------------------------------------------------------------------------------------------------------------------------------------------------------------------------------------------------------------------------------------------------------|---------------------------------|
| <b>Title and abstract</b> | 1       | (a) Indicate the study's design with a commonly used term in the title or the abstract                                                                                                                                                                                                                                                                                                                                                                                 | 1                               |
|                           |         | (b) Provide in the abstract an informative and balanced summary of what was done and what was found                                                                                                                                                                                                                                                                                                                                                                    | 2                               |
| <b>Introduction</b>       |         |                                                                                                                                                                                                                                                                                                                                                                                                                                                                        |                                 |
| Background/rationale      | 2       | Explain the scientific background and rationale for the investigation being reported                                                                                                                                                                                                                                                                                                                                                                                   | 4                               |
| Objectives                | 3       | State specific objectives, including any prespecified hypotheses                                                                                                                                                                                                                                                                                                                                                                                                       | 4                               |
| <b>Methods</b>            |         |                                                                                                                                                                                                                                                                                                                                                                                                                                                                        |                                 |
| Study design              | 4       | Present key elements of study design early in the paper                                                                                                                                                                                                                                                                                                                                                                                                                | 4,5                             |
| Setting                   | 5       | Describe the setting, locations, and relevant dates, including periods of recruitment, exposure, follow-up, and data collection                                                                                                                                                                                                                                                                                                                                        | 4,5                             |
| Participants              | 6       | (a) <i>Cohort study</i> —Give the eligibility criteria, and the sources and methods of selection of participants. Describe methods of follow-up<br><i>Case-control study</i> —Give the eligibility criteria, and the sources and methods of case ascertainment and control selection. Give the rationale for the choice of cases and controls<br><i>Cross-sectional study</i> —Give the eligibility criteria, and the sources and methods of selection of participants | 5                               |
|                           |         | (b) <i>Cohort study</i> —For matched studies, give matching criteria and number of exposed and unexposed<br><i>Case-control study</i> —For matched studies, give matching criteria and the number of controls per case                                                                                                                                                                                                                                                 | 5                               |
| Variables                 | 7       | Clearly define all outcomes, exposures, predictors, potential confounders, and effect modifiers. Give diagnostic criteria, if applicable                                                                                                                                                                                                                                                                                                                               | 5, 6 supplemental file 1 and 2  |
| Data sources/measurement  | 8*      | For each variable of interest, give sources of data and details of methods of assessment (measurement). Describe comparability of assessment methods if there is more than one group                                                                                                                                                                                                                                                                                   | 5, 6, supplemental file 1 and 2 |
| Bias                      | 9       | Describe any efforts to address potential sources of bias                                                                                                                                                                                                                                                                                                                                                                                                              | N/A                             |
| Study size                | 10      | Explain how the study size was arrived at                                                                                                                                                                                                                                                                                                                                                                                                                              | 5,6                             |
| Quantitative variables    | 11      | Explain how quantitative variables were handled in the analyses. If applicable, describe which groupings were chosen and why                                                                                                                                                                                                                                                                                                                                           | 5,6                             |
| Statistical methods       | 12      | (a) Describe all statistical methods, including those used to control for confounding                                                                                                                                                                                                                                                                                                                                                                                  | 6                               |
|                           |         | (b) Describe any methods used to examine subgroups and interactions                                                                                                                                                                                                                                                                                                                                                                                                    | 6                               |
|                           |         | (c) Explain how missing data were addressed                                                                                                                                                                                                                                                                                                                                                                                                                            | 5                               |

1  
2  
3  
4  
5  
6  
7  
8  
9  
10  
11  
12  
13  
14  
15  
16  
17  
18  
19  
20  
21  
22  
23  
24  
25  
26  
27  
28  
29  
30  
31  
32  
33  
34  
35  
36  
37  
38  
39  
40  
41  
42  
43  
44  
45  
46  
47  
48  
49  
50  
51  
52  
53  
54  
55  
56  
57  
58  
59  
60

(d) *Cohort study*—If applicable, explain how loss to follow-up was addressed

5

*Case-control study*—If applicable, explain how matching of cases and controls was addressed

*Cross-sectional study*—If applicable, describe analytical methods taking account of sampling strategy

(e) Describe any sensitivity analyses

Continued on next page

For peer review only

1  
2  
3  
4  
5  
6  
7  
8  
9  
10  
11  
12  
13  
14  
15  
16  
17  
18  
19  
20  
21  
22  
23  
24  
25  
26  
27  
28  
29  
30  
31  
32  
33  
34  
35  
36  
37  
38  
39  
40  
41  
42  
43  
44  
45  
46  
47  
48  
49  
50  
51  
52  
53  
54  
55  
56  
57  
58  
59  
60**Results**

|                  |     |                                                                                                                                                                                                              |             |
|------------------|-----|--------------------------------------------------------------------------------------------------------------------------------------------------------------------------------------------------------------|-------------|
| Participants     | 13* | (a) Report numbers of individuals at each stage of study—eg numbers potentially eligible, examined for eligibility, confirmed eligible, included in the study, completing follow-up, and analysed            | Fig 1       |
|                  |     | (b) Give reasons for non-participation at each stage                                                                                                                                                         | Fig 1       |
|                  |     | (c) Consider use of a flow diagram                                                                                                                                                                           | Fig 1       |
| Descriptive data | 14* | (a) Give characteristics of study participants (eg demographic, clinical, social) and information on exposures and potential confounders                                                                     | 6           |
|                  |     | (b) Indicate number of participants with missing data for each variable of interest                                                                                                                          | N/A         |
|                  |     | (c) <i>Cohort study</i> —Summarise follow-up time (eg, average and total amount)                                                                                                                             | N/A         |
| Outcome data     | 15* | <i>Cohort study</i> —Report numbers of outcome events or summary measures over time                                                                                                                          | table 1 - 3 |
|                  |     | <i>Case-control study</i> —Report numbers in each exposure category, or summary measures of exposure                                                                                                         | table 4     |
|                  |     | <i>Cross-sectional study</i> —Report numbers of outcome events or summary measures                                                                                                                           |             |
| Main results     | 16  | (a) Give unadjusted estimates and, if applicable, confounder-adjusted estimates and their precision (eg, 95% confidence interval). Make clear which confounders were adjusted for and why they were included | 9,10        |
|                  |     | (b) Report category boundaries when continuous variables were categorized                                                                                                                                    | table 4     |
|                  |     | (c) If relevant, consider translating estimates of relative risk into absolute risk for a meaningful time period                                                                                             | N/A         |
| Other analyses   | 17  | Report other analyses done—eg analyses of subgroups and interactions, and sensitivity analyses                                                                                                               | 9           |

**Discussion**

|                  |    |                                                                                                                                                                            |       |
|------------------|----|----------------------------------------------------------------------------------------------------------------------------------------------------------------------------|-------|
| Key results      | 18 | Summarise key results with reference to study objectives                                                                                                                   | 8,9   |
| Limitations      | 19 | Discuss limitations of the study, taking into account sources of potential bias or imprecision. Discuss both direction and magnitude of any potential bias                 | 12,13 |
| Interpretation   | 20 | Give a cautious overall interpretation of results considering objectives, limitations, multiplicity of analyses, results from similar studies, and other relevant evidence | 10,11 |
| Generalisability | 21 | Discuss the generalisability (external validity) of the study results                                                                                                      | 13    |

**Other information**

|         |    |                                                                                                                                                               |    |
|---------|----|---------------------------------------------------------------------------------------------------------------------------------------------------------------|----|
| Funding | 22 | Give the source of funding and the role of the funders for the present study and, if applicable, for the original study on which the present article is based | 14 |
|---------|----|---------------------------------------------------------------------------------------------------------------------------------------------------------------|----|

\*Give information separately for cases and controls in case-control studies and, if applicable, for exposed and unexposed groups in cohort and cross-sectional studies.

**Note:** An Explanation and Elaboration article discusses each checklist item and gives methodological background and published examples of transparent reporting. The STROBE checklist is best used in conjunction with this article (freely available on the Web sites of PLoS Medicine at <http://www.plosmedicine.org/>, Annals of Internal Medicine at <http://www.annals.org/>, and Epidemiology at <http://www.epidem.com/>). Information on the STROBE Initiative is available at [www.strobe-statement.org](http://www.strobe-statement.org).

# BMJ Open

## Epilepsy and mortality: a retrospective cohort analysis with a nested case-control study identifying causes and risk factors from primary care and linkage-derived data

|                                 |                                                                                                                                                                                                                                                                                                                                                                                                                                                                                                                                                                                                                                                                                   |
|---------------------------------|-----------------------------------------------------------------------------------------------------------------------------------------------------------------------------------------------------------------------------------------------------------------------------------------------------------------------------------------------------------------------------------------------------------------------------------------------------------------------------------------------------------------------------------------------------------------------------------------------------------------------------------------------------------------------------------|
| Journal:                        | <i>BMJ Open</i>                                                                                                                                                                                                                                                                                                                                                                                                                                                                                                                                                                                                                                                                   |
| Manuscript ID                   | bmjopen-2021-052841.R2                                                                                                                                                                                                                                                                                                                                                                                                                                                                                                                                                                                                                                                            |
| Article Type:                   | Original research                                                                                                                                                                                                                                                                                                                                                                                                                                                                                                                                                                                                                                                                 |
| Date Submitted by the Author:   | 05-Oct-2021                                                                                                                                                                                                                                                                                                                                                                                                                                                                                                                                                                                                                                                                       |
| Complete List of Authors:       | Wojewodka, Gabriella; King's College London Institute of Psychiatry Psychology and Neuroscience, Basic & Clinical Neuroscience<br>Gulliford, Martin; King's College London, School of Population Health and Environmental Sciences; NIHR Biomedical Research Centre at Guy's and Saint Thomas' NHS Foundation Trust and King's College<br>Ashworth, Mark; King's College London, School of Population Health & Environmental Sciences<br>Richardson, Mark; King's College London, Institute of Psychiatry, Psychology & Neuroscience<br>Ridsdale, Leone; King's College London Institute of Psychiatry Psychology and Neuroscience, Department of Basic and Clinical Neuroscience |
| <b>Primary Subject Heading</b>: | Neurology                                                                                                                                                                                                                                                                                                                                                                                                                                                                                                                                                                                                                                                                         |
| Secondary Subject Heading:      | General practice / Family practice                                                                                                                                                                                                                                                                                                                                                                                                                                                                                                                                                                                                                                                |
| Keywords:                       | Epilepsy < NEUROLOGY, PRIMARY CARE, EPIDEMIOLOGY                                                                                                                                                                                                                                                                                                                                                                                                                                                                                                                                                                                                                                  |
|                                 |                                                                                                                                                                                                                                                                                                                                                                                                                                                                                                                                                                                                                                                                                   |

SCHOLARONE™  
Manuscripts



I, the Submitting Author has the right to grant and does grant on behalf of all authors of the Work (as defined in the below author licence), an exclusive licence and/or a non-exclusive licence for contributions from authors who are: i) UK Crown employees; ii) where BMJ has agreed a CC-BY licence shall apply, and/or iii) in accordance with the terms applicable for US Federal Government officers or employees acting as part of their official duties; on a worldwide, perpetual, irrevocable, royalty-free basis to BMJ Publishing Group Ltd ("BMJ") its licensees and where the relevant Journal is co-owned by BMJ to the co-owners of the Journal, to publish the Work in this journal and any other BMJ products and to exploit all rights, as set out in our [licence](#).

The Submitting Author accepts and understands that any supply made under these terms is made by BMJ to the Submitting Author unless you are acting as an employee on behalf of your employer or a postgraduate student of an affiliated institution which is paying any applicable article publishing charge ("APC") for Open Access articles. Where the Submitting Author wishes to make the Work available on an Open Access basis (and intends to pay the relevant APC), the terms of reuse of such Open Access shall be governed by a Creative Commons licence – details of these licences and which [Creative Commons](#) licence will apply to this Work are set out in our licence referred to above.

Other than as permitted in any relevant BMJ Author's Self Archiving Policies, I confirm this Work has not been accepted for publication elsewhere, is not being considered for publication elsewhere and does not duplicate material already published. I confirm all authors consent to publication of this Work and authorise the granting of this licence.

1  
2  
3 **Epilepsy and mortality: a retrospective cohort analysis with a nested case-control study**  
4 **identifying causes and risk factors from primary care and linkage-derived data**  
5

6 **Gabriella Wojewodka<sup>1</sup>, Martin Gulliford<sup>2,3</sup>, Mark Ashworth<sup>2</sup>, Mark P. Richardson<sup>1</sup>, Leone Ridsdale<sup>1</sup>**  
7

8 <sup>1</sup> King's College London, Institute of Psychiatry, Psychology and Neuroscience, Department of Basic and Clinical  
9 Neuroscience, London, UK.  
10

11 <sup>2</sup> King's College London, School of Population Health and Environmental Sciences, London, UK.  
12

13 <sup>3</sup> National Institute for Health Research Biomedical Research Centre at Guy's and St Thomas' Hospitals, London,  
14 UK  
15

16  
17  
18 Corresponding author: Dr. Gabriella Wojewodka, King's College London, IoPPN, 16 De Crespigny  
19 Park, PO63, London, UK, SE5 8AF. email: gabriella.wojewodka@kcl.ac.uk  
20

21  
22  
23  
24 WORD COUNT: 3956  
25  
26  
27  
28  
29  
30  
31  
32  
33  
34  
35  
36  
37  
38  
39  
40  
41  
42  
43  
44  
45  
46  
47  
48  
49  
50  
51  
52  
53  
54  
55  
56  
57  
58  
59  
60

## ABSTRACT

### Objectives

People with epilepsy (PWE) have a higher mortality rate than the general population. Epilepsy related deaths have increased despite all-cause mortality decreasing in the general population pre-Covid-19. We hypothesized that clinical and lifestyle factors may identify people more at risk.

### Design

We used a retrospective cohort study to explore cause of death and a nested case-control study to identify risk factors.

### Setting

We explored factors associated with mortality using primary care population data from 01/04/2004 to 31/03/2014. Data was obtained from the Clinical Practice Research Datalink (CPRD) which compiles anonymised patient data from primary care in the UK. Cause of death data was supplemented from the Office of National Statistics when available.

### Participants

The analysis included 70,431 people with epilepsy, with 11,241 registered deaths.

### Results

The number of deaths within the database increased by 69% between the first and last year of the study. Epilepsy was considered as a contributing cause in approximately 45% of deaths of PWE under 35. Factors associated with increased risk of death included attendance at emergency departments and/or emergency admissions (OR: 3.48 CI: 3.19–3.80), anti-epileptic drug (AED) polytherapy (2 AEDs: OR 1.60 CI:1.51–1.71; 3 AEDs: OR: 2.06 CI: 1.86–2.29; 4+ AEDs: OR: 2.62 CI: 2.23–3.08), status epilepticus (OR: 2.78 CI: 1.64–4.71), depression (OR: 1.67 CI: 1.57–1.76) and injuries (OR: 1.54 CI: 1.35–1.56). No seizures in the prior year (OR: 0.52 CI: 0.41–0.65).

### Conclusion

Our results add to existing evidence that deaths in epilepsy are increasing. Future studies could focus on identifying PWE at high risk and addressing them with clinical interventions or better self-management. Identifying specific risk factors for younger people should be a priority as epilepsy may be a factor in close to half of deaths of PWE under 35 years of age.



**STRENGTHS AND LIMITATIONS OF THE STUDY**

- The study examines the higher mortality rate in epilepsy by exploring risk factors that could be mitigated by interventions in clinical practice
- The study included data collected in primary care which is large and representative compared to hospital data
- The large sample size collected from participating UK practices contributes to the generalisability of the results
- The data set used was from 2004 to 2014, as this covered a period where epilepsy was part of a national programme for outcome reporting.

For peer review only

## INTRODUCTION

Epilepsy is one of the most common neurological conditions with about 50 million people affected worldwide.<sup>1</sup> With access to good treatment, it is estimated that 60-70% of people with epilepsy (PWE) can become free of seizure.<sup>2</sup> However, epilepsy is also an important cause of premature death.<sup>3</sup> Mortality rates of people with epilepsy are higher than for the general population.<sup>4-9</sup> A longitudinal cohort study from Sweden found that an epilepsy diagnosis was associated with a 14-fold increased risk of all-cause death.<sup>5</sup> Some studies suggest that this has not changed over time.<sup>4 10</sup> Other data suggest the number of deaths in PWE is increasing despite a decrease in all-cause mortality in the general population.<sup>8 11 12</sup> Public Health England reported that deaths with epilepsy as a contributing factor increased by 70% between 2001 and 2014, while all-cause deaths in the population decreased by 6%.<sup>11</sup>

Some causes of death in PWE are similar to the general population, such as circulatory and respiratory diseases, dementia, Alzheimer's and cancers.<sup>11 13 14</sup> Others are related to consequences of the condition itself such as injuries, burns and drowning during seizures.<sup>5 9 15</sup> Lifestyle and psychosocial factors contribute to increased risk of mortality and include alcohol or substance misuse,<sup>13 16</sup> low adherence to medication,<sup>10</sup> depression,<sup>5 16</sup> and socioeconomic status.<sup>11 16</sup> Sudden unexpected death in epilepsy (SUDEP) is sometimes posited as a common cause of death for PWE. A recent review suggests SUDEP accounts for 12% of all-cause deaths in epilepsy.<sup>10</sup> However, factors that can be prevented or treated are under-researched and could lead to more impact on reducing mortality.

In 2011, our group published risk factors increasing mortality in PWE based on population data collected in primary care in the United Kingdom (UK) between 1993 and 2007.<sup>16</sup> Here, we follow-up on the analysis using data collected during an incentivised programme which rewarded enhanced monitoring and care for people with epilepsy in primary care over ten years. We hypothesised that the epilepsy data collected under this programme would be of high quality allowing for a comprehensive analysis of causes and risk factors associated with mortality. We report the number of deaths recorded during this time, the causes of death for younger and older PWE, and risk factors associated with mortality among PWE.

## METHODS

### Study Design

A retrospective cohort design was used to analyse mortality and causes of death in PWE. Risk factors affecting mortality were analysed using a nested case-control study. This study was approved by the Independent Scientific Advisory Committee of the CPRD (protocol 17\_208R2).

### Setting

Data was obtained from the Clinical Practice Research Datalink (CPRD). This database contains anonymised patient data obtained from electronic records from primary care clinics in the UK. The data is sent from participating clinics to a central server where data is cleaned, checked for quality and curated. A study from 2015 counted 11,299,221 patients registered in the CPRD from 674 GP practices.<sup>17</sup> Patients in the database were representative of the UK population when compared to the 2011 census.<sup>17</sup> For our study period, mid-year counts for 2004 show 4,584,065 patients were active in the database (alive and currently registered in a GP practice) with 50.1% being female. In 2013, 4,493,034 patients were active at mid-year and 50.4% were female.

1  
2  
3 Our study period was from 01/04/2004 to 31/03/2014 during which epilepsy management came  
4 under the Quality and Outcomes Framework (QOF), a programme implemented within the primary  
5 care setting. Revised QOF clinical indicators were implemented in April 2014 when most epilepsy  
6 indicators were discontinued. The aim of the programme was to incentivize improvement in the  
7 recording of clinical information on specific lifestyle items or long term health conditions with the view  
8 that structured monitoring and reporting improved the quality of care.<sup>18</sup>  
9  
10

### 11 **Types of data**

12  
13 The CPRD includes “patient data” which include demographic information, “clinical data” include  
14 information on clinical events such as diagnosis or symptoms, and “additional clinical details” that  
15 include lifestyle factors. It also includes “therapy data” which contains information on prescriptions,  
16 product codes, doses and treatment schedules. Clinical data are entered initially as alpha numeric  
17 Read codes by the GP into electronic medical records. These are converted into numeric Medcodes  
18 within the CPRD for easier analysis by researchers. Medication types are recorded in “therapy data”  
19 as numeric Procodes.  
20  
21

22 Cause of death information was obtained when available through linked data for a subset of patients  
23 from England and Wales from the Office of National Statistics (ONS). The cause of death is presented  
24 using ICD-10 diagnostic codes and offers the main cause and up to 15 contributing causes, if  
25 applicable. Date of death was available both from the CPRD and ONS data and the earliest date of the  
26 two was used if there were discrepancies. The Index of Multiple Deprivation (IMD) was also obtained  
27 for each patient’s GP practice, which was used for control matching in the case-control study. Practice  
28 IMD data was “most up to date” version when requested in 2018.  
29  
30

### 31 **Cohort study participants**

32  
33 For the mortality and cause of death cohort study, adults with epilepsy were included who were least  
34 18 years old at time of death. Epilepsy was defined as having a documented epilepsy diagnostic code  
35 or seizure code and at least two prescriptions of antiepileptic drugs (AEDs). Using a diagnostic or  
36 seizure code with prescription data has been validated to identify cases of epilepsy in routinely  
37 collected data.<sup>19</sup> Any patient with a diagnostic code of “epilepsy resolved” was removed from the  
38 study (Medcodes 8385 and 12848, Read codes 2126000 and 212J.00). Codes used to identify epilepsy  
39 and seizures are presented in Table S1 (Supplemental File 1).  
40  
41

### 42 **Case-control study participants**

43  
44 Since we were focusing on the specific 12-month period prior to date of death to establish preventable  
45 risk factors, we opted to use a nested case-control study design. Cases were defined as PWE within  
46 the cohort with a documented date of death between 01/04/2004 to 31/03/2014 with at least 12  
47 months of data recorded in our study period (thus earliest data of death included was 01/04/2005).  
48 Controls were randomly matched at a ratio of 3:1 by sex, practice IMD, year of birth (+/- 1 year). For  
49 cases aged 18, controls were matched for year of birth + 1 year. Controls were alive for at least 12  
50 months after the date of death of their matched case. The first analysis was conducted for the whole  
51 dataset and a second one used data from PWE under the age of 35.  
52  
53

### 54 **Exposure variables**

55  
56 Potential variables were selected based on existing literature, items part of the QOF and others  
57 associated with lifestyle. Exposure data were refined based on the availability and reliability of data in  
58 the CPRD. Full description of variables and sources of data are included in the Supplemental File 1. List  
59 of codes used for each variable can be found in Supplemental File 2. We assessed variables occurring  
60

1  
2  
3 in the 12 months prior to the case's date of death for emergency department visits or emergency  
4 admissions, number of AEDs, status epilepticus, depression, injury, smoking status, and seizure  
5 freedom. History of co-morbidity was taken from all available patient data for dementia and stroke.  
6 Missing data was considered as "no" for binary outcomes except for smoking status where the last  
7 known status was used, as previously reported.<sup>20</sup> Variables that were considered but not included due  
8 to poor quality of data included alcohol and substance use.  
9

## 10 11 **Statistics**

12  
13 The number all-cause deaths recorded in the CPRD was calculated for complete calendar years (from  
14 2005 to 2013) to allow for comparisons with previous publications. All other analyses used data from  
15 the full study period (01/04/2004 to 31/03/2014). The cause of death data was analysed two ways: 1)  
16 tabulating the main cause of death in PWE and 2) evaluating the proportion of deaths with epilepsy  
17 listed as a contributing cause. A contributing cause was defined as either the main cause or listed as a  
18 cause in any of the other 15 positions on the death certificate. The main causes of death are presented  
19 for younger and older PWE with 65 years as the cut-off. Deaths with epilepsy as a contributing cause  
20 were divided by age group. To track trends, an additional analysis of main cause of death by full  
21 calendar year is presented in supplemental material (Table S2, Supplemental File 1).  
22

23  
24 Conditional logistic regression was used for the nested case-control study. Variables were included in  
25 the model following maximum likelihood and Akaike information criterion (AIC) testing. Potential  
26 confounders such as age, sex, and deprivation were addressed by control matching. Data are  
27 presented as odds ratios (ORs) and 95% confidence intervals. The analysis was conducted for the  
28 whole dataset and subsequently for the subset of PWE aged under 35.  
29

30  
31 The following interactions were tested: age and emergency visit/admission, age and injury, age and  
32 dementia, age and stroke, status epilepticus and emergency visit/admissions, number of AEDs and  
33 seizure freedom, prescription issue and number of AEDs, injury and emergency visit/admission.  
34

## 35 **Patient and Public Involvement**

36  
37 Patients or the public were not involved in the design, or conduct, or reporting, or dissemination plans  
38 of our research.  
39

## 40 41 42 **RESULTS**

43  
44 We obtained a sample size of 70,431 PWE with 11,241 who had a documented date of death within  
45 our time frame (Figure 1). We obtained cause of death for 7,405 people from ONS linked data. Age of  
46 patients ranged 18 to 105 with 50.8% male.  
47

### 48 **Number of deaths**

49  
50 The number of deaths recorded in the database increased between 2005 to 2013, from 821 to 1,386  
51 which represents a 68.8% increase (Table 1). This increase was not attributed to more PWE being  
52 registered in the database as this decreased by 21.8% over the same period. The mean age of the  
53 participants within the database increased over time.  
54  
55  
56  
57  
58  
59  
60

**Table 1.** Number of recorded deaths of PWE in the CPRD per full year within the study period.

|                                                            | 2005           | 2006           | 2007           | 2008           | 2009           | 2010           | 2011           | 2012           | 2013           |
|------------------------------------------------------------|----------------|----------------|----------------|----------------|----------------|----------------|----------------|----------------|----------------|
| <b>Average age of adult PWE in the database, mean (SD)</b> | 48.7<br>(18.5) | 49.0<br>(18.6) | 49.3<br>(18.6) | 49.6<br>(18.6) | 49.9<br>(18.6) | 50.2<br>(18.6) | 50.5<br>(18.6) | 50.8<br>(18.6) | 51.2<br>(18.6) |
| <b>Number of PWE registered in the database</b>            | 48,447         | 48,585         | 48,031         | 46,948         | 45,941         | 44,485         | 42,521         | 40,120         | 37,865         |
| <b>Number of recorded deaths</b>                           | 821            | 1,075          | 1,190          | 1,241          | 1,214          | 1,307          | 1,282          | 1,386          | 1,386          |
| <b>Number of deaths per 1000 PWE in the CPRD</b>           | 16.9           | 22.1           | 24.8           | 26.4           | 26.4           | 29.4           | 30.1           | 34.5           | 36.6           |

Note: PWE defined as having an epilepsy diagnostic code and at least two prescriptions of AEDs, aged >17. Study period was from 1<sup>st</sup> April 2004 to 31<sup>st</sup> March 2014. Only data from full calendar years within this time frame were used for this table.

### Cause of death

The main causes of death for PWE aged 18 to 64 years old were neoplasms (26.8%), diseases of the circulatory system (15.4%) and epilepsy (14.2%) (Table 2a). For PWE 65 years and over, the main causes of death were diseases of the circulatory system (37.3%), neoplasms (17.2%) and diseases of the respiratory system (15.6%) (Table 2b). Deaths due to epilepsy as a primary cause were documented in 2.7% of older PWE.

**Table 2a.** Documented main cause of death of people with epilepsy under 65 years

| ICD-10 category                                                                                   | Under 65, n (%) |
|---------------------------------------------------------------------------------------------------|-----------------|
| Neoplasms (C00-D48)                                                                               | 571(26.9)       |
| Diseases of the circulatory system (I00-I99)                                                      | 330 (15.6)      |
| Epilepsy (G40-G41)                                                                                | 302 (14.2)      |
| Diseases of the respiratory system (J00-J99)                                                      | 176 (8.3)       |
| Diseases of the nervous system (G00-G37, G43-G99), excluding epilepsy                             | 164 (7.7)       |
| Diseases of the digestive system (K00-KK93)                                                       | 161 (7.6)       |
| External causes of morbidity and mortality (V01-X59, X85-Y98)                                     | 129 (6.1)       |
| Congenital malformations, deformations and chromosomal abnormalities (Q00-Q99)                    | 70 (3.3)        |
| Mental and behavioural disorders (F00-F99)                                                        | 61 (2.9)        |
| Endocrine, nutritional and metabolic diseases (E00-E90)                                           | 34 (1.6)        |
| Symptoms, signs and abnormal clinical and laboratory findings, not elsewhere classified (R00-R99) | 29 (1.4)        |
| External causes of morbidity and mortality (intentional) (X60-X84)                                | 28 (1.3)        |
| Diseases of the genitourinary system (N00-N99)                                                    | 23 (1.1)        |
| Certain infectious and parasitic diseases (A00-B99)                                               | 20 (0.9)        |

|                                                                        |                      |
|------------------------------------------------------------------------|----------------------|
| Diseases of the blood and blood-forming organs (D50-D89)               | 9 (0.4)              |
| Diseases of the musculoskeletal system and connective tissue (M00-M99) | 9 (0.4)              |
| Diseases of the skin and subcutaneous tissue (L00-L99)                 | 4 (0.2)              |
| <b>Total</b>                                                           | <b>2,120 (100.0)</b> |

**Table 2b.** Documented main cause of death of people with epilepsy aged 65 and over

| ICD-10 category                                                                                   | 65 and over, n (%)   |
|---------------------------------------------------------------------------------------------------|----------------------|
| Diseases of the circulatory system (I00-I99)                                                      | 1973 (37.3)          |
| Neoplasms (C00-D48)                                                                               | 910 (17.2)           |
| Diseases of the respiratory system (J00-J99)                                                      | 827 (15.6)           |
| Mental and behavioural disorders (F00-F99)                                                        | 479 (9.1)            |
| Diseases of the nervous system (G00-G37, G43-G99), excluding epilepsy                             | 295 (5.6)            |
| Diseases of the digestive system (K00-KK93)                                                       | 173 (3.3)            |
| Epilepsy (G40-G41)                                                                                | 142 (2.7)            |
| Diseases of the genitourinary system (N00-N99)                                                    | 130 (2.5)            |
| External causes of morbidity and mortality (V01-X59, X85-Y98)                                     | 88 (1.7)             |
| Symptoms, signs and abnormal clinical and laboratory findings, not elsewhere classified (R00-R99) | 86 (1.6)             |
| Endocrine, nutritional and metabolic diseases (E00-E90)                                           | 67 (1.3)             |
| Certain infectious and parasitic diseases (A00-B99)                                               | 46 (0.9)             |
| Diseases of the musculoskeletal system and connective tissue (M00-M99)                            | 29 (0.5)             |
| Congenital malformations, deformations and chromosomal abnormalities (Q00-Q99)                    | 15 (0.3)             |
| Diseases of the skin and subcutaneous tissue (L00-L99)                                            | 13 (0.2)             |
| Diseases of the blood and blood-forming organs (D50-D89)                                          | 8 (0.2)              |
| External causes of morbidity and mortality (intentional) (X60-X84)                                | 4 (0.1)              |
| <b>Total</b>                                                                                      | <b>5,285 (100.0)</b> |

We tabulated the number of deaths with epilepsy listed as a cause of death, either the main or a contributing cause (Table 3). In PWE under 35, almost 45% of deaths had epilepsy as a contributory cause (35.1% to 53.3%, with a mean of 44.2%) (Table 3). The trends are similar between sexes under 35 and over 65. However, they differ in middle-age. At the 40-44 age group, epilepsy-contributing deaths were 2-fold higher in male compared to female PWE.

**Table 3.** Epilepsy documented as a contributing cause of death by age group

| Age group | Male                |                                                                             | Female              |                                                                             |
|-----------|---------------------|-----------------------------------------------------------------------------|---------------------|-----------------------------------------------------------------------------|
|           | All cause deaths, n | Deaths with epilepsy as contributing cause, n (%) [95% Confidence Interval] | All cause deaths, n | Deaths with epilepsy as contributing cause, n (%) [95% Confidence Interval] |
| 18-19     | 15                  | 8 (53.3) [28.1 – 78.6]                                                      | 8                   | 3 (37.5) [4.0 – 71.0]                                                       |
| 20-24     | 37                  | 17 (45.9) [29.9 – 62.0]                                                     | 29                  | 13 (44.8) [26.7 – 62.9]                                                     |
| 25-29     | 45                  | 22 (48.9) [34.3 – 63.5]                                                     | 37                  | 17 (45.9) [29.9 – 62.0]                                                     |
| 30-34     | 64                  | 27 (42.2) [30.1 – 54.3]                                                     | 37                  | 13 (35.1) [19.8 – 50.5]                                                     |
| 35-39     | 81                  | 19 (23.5) [14.2 – 32.7]                                                     | 62                  | 17 (27.4) [16.3 – 38.5]                                                     |
| 40-44     | 135                 | 44 (32.6) [24.7 – 40.5]                                                     | 75                  | 12 (16.0) [7.7 – 24.3]                                                      |

|        |     |                         |     |                         |
|--------|-----|-------------------------|-----|-------------------------|
| 45-49  | 157 | 42 (26.8) [19.8 – 33.7] | 104 | 18 (17.3) [10.0 – 24.6] |
| 50-54  | 213 | 58 (27.2) [21.3 – 33.2] | 114 | 19 (16.7) [9.8 – 23.5]  |
| 55-59  | 238 | 44 (18.5) [13.6 – 23.4] | 165 | 23 (13.9) [8.7 – 19.2]  |
| 60-64  | 291 | 63 (21.6) [16.9 – 26.4] | 213 | 36 (16.9) [11.9 – 21.9] |
| 65-69  | 323 | 42 (13.0) [9.3 – 16.7]  | 266 | 38 (14.3) [10.1 – 18.5] |
| 70-74  | 442 | 60 (13.6) [10.4 – 16.8] | 295 | 34 (11.5) [7.9 – 15.2]  |
| 75-79  | 475 | 44 (9.3) [6.7 – 11.9]   | 444 | 57 (12.8) [9.7 – 15.9]  |
| 80-84  | 517 | 53 (10.3) [7.6 – 12.9]  | 578 | 68 (11.8) [9.1 – 14.4]  |
| 85-89  | 485 | 54 (11.1) [8.3 – 13.9]  | 623 | 62 (10.0) [7.6 – 12.3]  |
| 90-105 | 290 | 22 (7.6) [4.5 – 10.6]   | 547 | 65 (11.9) [9.2 – 14.6]  |

To explore whether there were changes in the causes of death over time, we tabulated the main cause of death by year (Supplementary File 1, Table S2). Diseases of the circulatory system were consistently listed as the highest main cause of death for each year. The proportion of deaths due to mental and behavioural disorders doubled from 2011 onwards (mean percentage for 2005 to 2010: 5.05%, mean percentage for 2011 to 2013: 10.7%). The proportion of deaths attributed to epilepsy as the primary cause remained relatively stable throughout (6.3% for 2005 to 5.2% for 2013), although the number of deaths this represented increased (33 in 2005 to 51 to 2013).

### Risk factors

Risk factors included in the model, frequencies and associated ORs are presented in Table 4. Attendance at emergency departments in the previous 12 months was associated with the highest risk (OR: 3.48 CI: 3.19 – 3.80). Compared to being prescribed one AED, prescription of two or more AEDs was associated with an elevated risk of death (2 AEDs: OR: 1.60 CI: 1.51 – 1.71; 3 AEDs: OR: 2.06 CI: 1.86 – 2.29; 4+ AEDs: OR: 2.62 CI: 2.23 – 3.08), while no AED prescription was associated with a lower risk (OR: 0.77 CI: 0.68 – 0.87) (Table 4). Other factors associated with an increased risk of mortality included experiencing status epilepticus within the past 12 months (OR: 2.78 CI: 1.64 – 4.71), depression (OR: 1.67 CI: 1.57 – 1.76), smoking (OR: 1.45 CI: 1.35 – 1.56), injury (OR: 1.54 CI: 1.43 – 1.67), and history of dementia (OR: 1.39 CI: 1.26 – 1.53) and stroke (OR: 1.07 CI: 1.01 – 1.14).

A lower risk of death was associated with seizure freedom in the previous 12 months (OR: 0.52 CI: 0.41 – 0.65).

We found an interaction between having an emergency department visit or emergency admission and injury (OR: 0.59 CI: 0.48 – 0.70).

As the cohort analysis of cause of death revealed epilepsy was a significant contributing factor of the cause of death in young PWE, we repeated the risk factor analysis for PWE aged under 35. Significant risk factors associated with risk of death included emergency department visit (OR: 3.90 CI: 2.44 – 6.23), number of AEDs (No AEDs: 0.42 CI 0.21 – 0.84, 2 AEDs: OR: 1.72 CI: 1.23 – 2.40; 3 AEDs OR: 2.37 CI 1.52 – 3.67, 4+ AEDs: OR: 3.76 CI: 2.26 – 6.26), injury (OR: 1.99 CI: 1.19 – 3.31) and seizure freedom (OR: 0.17 CI 0.02 – 1.44).



**Table 4.** Risk factors Increasing mortality in PWE

| Factor                                                | Group      | All            |              |            |                         | Age < 35       |             |            |                         |
|-------------------------------------------------------|------------|----------------|--------------|------------|-------------------------|----------------|-------------|------------|-------------------------|
|                                                       |            | Controls n (%) | Cases n (%)  | Odds Ratio | 95% Confidence interval | Controls n (%) | Cases n (%) | Odds Ratio | 95% Confidence interval |
| Emergency department visit or emergency admission     | no         | 25,712 (94.2)  | 7,469 (82.1) | reference  |                         | 875 (95.9)     | 252 (82.9)  | reference  |                         |
|                                                       | yes        | 1,576 (5.8)    | 1,627 (17.9) | 3.48       | 3.19 - 3.80             | 37 (4.1)       | 52 (17.1)   | 3.90       | 2.44 – 6.23             |
| Number of AEDs prescribed                             | 0          | 1,667 (6.1)    | 353 (3.9)    | 0.77       | 0.68 - 0.87             | 107 (11.7)     | 10 (3.3)    | 0.42       | 0.21 – 0.84             |
|                                                       | 1          | 18,768 (68.8)  | 5,233 (57.5) | reference  |                         | 480 (52.6)     | 116 (38.2)  | reference  |                         |
|                                                       | 2          | 5,196 (19.0)   | 2,453 (27.0) | 1.60       | 1.51 - 1.71             | 196 (21.5)     | 86 (28.3)   | 1.72       | 1.23 – 2.40             |
|                                                       | 3          | 1,231 (4.5)    | 732 (8.0)    | 2.06       | 1.86 - 2.29             | 85 (9.3)       | 48 (15.8)   | 2.37       | 1.52 – 3.67             |
|                                                       | 4+         | 426 (1.6)      | 325 (3.6)    | 2.62       | 2.23 - 3.08             | 44 (4.8)       | 44 (14.5)   | 3.76       | 2.26 – 6.26             |
| Status epilepticus                                    | no         | 27,261 (99.9)  | 9,060 (99.6) | reference  |                         |                |             |            |                         |
|                                                       | yes        | 27 (0.1)       | 36 (0.4)     | 2.78       | 1.64 - 4.71             |                |             |            |                         |
| Depression                                            | no         | 21,790 (79.9)  | 6,158 (67.7) | reference  |                         |                |             |            |                         |
|                                                       | yes        | 5,498 (20.1)   | 2,938 (32.3) | 1.67       | 1.57 - 1.76             |                |             |            |                         |
| Smoking status                                        | Non-smoker | 23,904 (87.6)  | 7,579 (83.3) | reference  |                         |                |             |            |                         |
|                                                       | Smoker     | 3,384 (12.4)   | 1,517 (16.7) | 1.45       | 1.35 - 1.56             |                |             |            |                         |
| Injury                                                | no         | 24,347 (89.2)  | 7,579 (83.3) | reference  |                         | 864 (94.7)     | 270 (88.8)  | reference  |                         |
|                                                       | yes        | 2,941 (10.8)   | 1,517 (16.7) | 1.54       | 1.43 - 1.67             | 48 (5.3)       | 34 (11.2)   | 1.99       | 1.19 – 3.31             |
| Dementia                                              | no         | 25,698 (94.2)  | 8,328 (91.6) | reference  |                         |                |             |            |                         |
|                                                       | yes        | 1,590 (5.8)    | 768 (8.4)    | 1.39       | 1.26 - 1.53             |                |             |            |                         |
| Stroke                                                | no         | 21,699 (79.5)  | 6,960 (76.5) | reference  |                         |                |             |            |                         |
|                                                       | yes        | 5,589 (20.5)   | 2,136 (23.5) | 1.07       | 1.01 - 1.14             |                |             |            |                         |
| Age                                                   |            |                |              | 1.15       | 1.11 - 1.19             |                |             |            |                         |
| Seizure-free in previous 12 months                    | no         | 25,180 (92.3)  | 8,611 (94.7) | reference  |                         | 895 (98.1)     | 303 (99.7)  | reference  |                         |
|                                                       | yes        | 2,108 (7.7)    | 485 (5.3)    | 0.52       | 0.41 - 0.65             | 17 (1.9)       | 1 (0.3)     | 0.17       | 0.02 – 1.44             |
| Interaction: emergency department/ admission x injury |            |                |              | 0.59       | 0.48 – 0.70             |                |             |            |                         |

## DISCUSSION

We examined the causes of death among PWE and risk factors associated with mortality in a group of PWE derived from primary care data. The number of PWE with recorded deaths increased throughout our 9-year study period while the deaths attributed to epilepsy remained stable. In our model, we found important factors associated with a higher risk of mortality, some of which could be identified and potentially ameliorated by step-up care.

There were differences in the proportion of deaths attributed to epilepsy between younger and older PWE. Studies have found deaths of younger PWE are more often attributed to epilepsy.<sup>21 22</sup> Indeed, epilepsy was the third highest main cause of death in younger PWE in our study, accounting for almost 15% of deaths. This increased to 35-50% when evaluating all contributing causes in age groups under 35. As younger PWE tend to have less co-morbidity than older adults, it may be simpler to attribute epilepsy as the main cause of death. New diagnoses of epilepsy in people over 65 are often secondary to cerebrovascular disease such as stroke or neoplasms in the brain.<sup>23</sup> In our study, dementia was found to increase the risk of death, which has been found to share biological links with epilepsy.<sup>24</sup> New onset epilepsy in older people tends to be better controlled with AEDs.<sup>25</sup> Thus, other co-morbidity may take precedence in older PWE when documenting the cause of death, as epilepsy contributed to only about 10% of deaths and was listed as a main cause in 3%.

### Factors associated with increased risk of death

Our findings support evidence from previous studies. Factors associated with risk of mortality in epilepsy included: depression,<sup>5 16 26</sup> injuries,<sup>3 5 9 16 27</sup> dementia and stroke,<sup>13 28</sup> age,<sup>13</sup> and seizure freedom.<sup>3 13 15 16</sup> Novel findings include increased risk associated with emergency department visits and/or emergency admissions, prescription of more than one AED, and status epilepticus. Status epilepticus is a known cause of death,<sup>13 22 29</sup> however, to our knowledge, it has not been included within a risk model before.

For the younger PWE group, emergency visit or emergency admissions, number of AEDs and injury were associated with higher risk of death. While, like the wider-sample, seizure freedom was associated with a lower risk of death.

### Clinical Implications

#### Epilepsy management

The need for better epilepsy management is at the core of our findings. Several risk factors are linked within this theme such as emergency department attendance, polypharmacy, injury, and seizure freedom.

Visits to emergency departments or emergency admissions were associated with a 3-fold increased risk of death, the highest risk in our model. Visits to emergency services are associated with having injuries,<sup>30</sup> experiencing a seizure or a change in normal seizure presentation,<sup>31</sup> and having less confidence in self-management.<sup>32</sup> Attendance at emergency departments for epilepsy could thus be considered a surrogate marker for poorer epilepsy control.<sup>33</sup> The National Audit of Seizure management in Hospitals (NASH), conducted during our study period in 2011 and 2013, found 63% of PWE presenting to emergency departments for seizures had not been seen by a specialist in the previous year.<sup>34</sup> Moreover only half of attendees were either seen by a neurologist on site or referred to one upon discharge.<sup>34</sup> These are missed opportunities to follow-up with patients who may be in need of clinical review and help with self-management, to mitigate their greater risk of death.

### Areas for possible intervention

Regular medication review for people on multiple AEDs may be important as increased mortality risk was associated with two or more AEDs. Prescriptions of multiple AEDs may be an effect of having more refractory and harder to control epilepsy. However, polypharmacy may also result in more side-effects and different treatment schedules which could lead to more problems with medication adherence.<sup>35</sup>

Depression has been reported in about 25% of PWE.<sup>36 37</sup> In our study, we found 30% of cases and 20% of controls had either a diagnosis of depression or a prescription of anti-depressants. Depression and other psychiatric disorders have been found to be associated with worse quality of life<sup>38</sup> and affect self-management.<sup>39</sup> Many PWE have said they do not feel their mental health needs are being addressed and thus depression may be underassessed in this patient group.<sup>40</sup> As the proportion of deaths with psychiatric illness as a main cause increased 2-fold in our study period, psychiatric assessment and management should be provided for people with epilepsy.

Ultimately, the goal of better epilepsy management is seizure reduction or seizure freedom. Seizure freedom was associated with approximately a 50% reduced risk of mortality in our model. Previous findings showed seizure freedom conveyed similar mortality rates for PWE as those observed in the general population.<sup>15</sup>

### Other factors

We explored lifestyle factors which may be associated with increased mortality and found smoking to be associated with a higher risk. Other findings may be less amenable to change, although some intervention may be helpful. For example, experiencing status epilepticus in the previous 12 months was associated with a higher risk of death. In epilepsy, it is most often associated with low blood levels of AEDs or alcohol misuse.<sup>41</sup> Injury to the brain (trauma, hypoxia, anoxia), tumours, infections and stroke can also trigger status epilepticus and thus it may not be preventable.<sup>41</sup>

### Strengths and limitations

The CPRD contains data collected from primary care which is vast and increased the generalisability of results as all participating UK practices were included. However, we relied on clinical data which has some limitations as compared to epidemiological studies. It is possible that a small number of cases might have been misclassified as having epilepsy but our case definitions of an epilepsy diagnostic code and AED prescription have been validated and used in previous studies.<sup>16 19 42</sup> Conversely, patients who presented to emergency departments or were managed only by hospital specialists might not have been included.

The quality of information in the CPRD is dependent on data entered by practice staff during consultations for clinical use, not for research purposes. Items not applicable for a patient may be left off, rather than recorded as such. In the case of diagnosis, there is no option for a GP to enter an absence of diagnosis. Missing data in routine primary care databases are not missing at random and thus statistical methods of dealing with missing data, such as multiple imputation, may not be appropriate.<sup>43 44</sup> For this reason, we interpreted missing data as “no” or “no complication”, however we recognise this may be a limitation for some factors. Other limitations include not knowing the cause of injuries or hospital attendance and thus they may be unrelated to epilepsy.

We defined the exposure variables based on previous studies, if available.<sup>16 20 45</sup> The CPRD information has been validated for long term-conditions, such as dementia and Alzheimer’s disease, and for diagnoses made by hospital consultants.<sup>46</sup> As GPs issue prescriptions via electronic systems, the CPRD “therapy data” has been found to be highly accurate for medication variables.<sup>47</sup> However, we included

1  
2  
3 variables which may not have been previously validated such as injury and emergency department  
4 visit or emergency admission which is a limitation of this study. We explored other factors such as  
5 severe mental illness, self-injury, patient-level index of multiple deprivation, alcohol use, substance  
6 use, pregnancy and learning disability. These were found statistically not significant and not included  
7 in the final overall model or the under-35 model. We also investigated interactions between variables.  
8 While we found a significant interaction between emergency admissions and injuries, we did not find  
9 one with status epilepticus. This suggests that status epilepticus might have been under recorded as  
10 a reason for emergency department visits, and perhaps entered under a more general “epilepsy” code  
11 within GP patient notes. However, these missing episodes of status would be captured by the  
12 emergency department admission variable, which was associated with the highest risk of death in our  
13 study. We hypothesize that accurate recording of status epilepticus would have further increased its  
14 associated risk with mortality.  
15  
16  
17

18 The time frame of our analysis corresponded to the period where epilepsy was part of the Quality and  
19 Outcomes Framework, a programme whereby GPs were contracted to record specific characteristics  
20 of their patients with epilepsy.<sup>48</sup> In particular, data on drug treatment, seizure frequency and seizure  
21 freedom were part of this programme.<sup>48</sup> We hypothesized that this would lead to better quality data  
22 for epilepsy and strengthen the study. While the data collected may be more complete than years  
23 prior, GP practices were less successful in achieving targets for epilepsy compared to other conditions,  
24 some of which are more highly rewarded.<sup>48 49</sup> Older data may contain outdated diagnoses of epilepsy  
25 which may not have been reconfirmed by today’s standards, and if in remission, might not have been  
26 designated with an epilepsy resolved code. This could lead to missing epilepsy data. However, the  
27 strength of the CRPD is the vast data collected from the community setting compared to hospital  
28 databases or disease specific registers.<sup>19 42</sup>  
29  
30  
31

32 A limitation of our cohort study is the use of linked ONS data, which is only available for consenting  
33 individuals from England and Wales. Thus, data was not available for our whole cohort, and findings  
34 are not generalisable to Scotland and Northern Ireland. Death certificate data for epilepsy has often  
35 been found to be problematic. A 2002 audit of UK data found up to 40% of deaths were attributed to  
36 the wrong cause for PWE.<sup>50</sup> Epilepsy tends to be underestimated as a cause of death<sup>8 26</sup> and dismissed  
37 for other cardiovascular or respiratory explanations.<sup>21 26 51</sup> Indeed, we found other diseases were listed  
38 as primary cause of death which may in fact have been epilepsy. The percentage of deaths with  
39 epilepsy as a main cause remained stable throughout our study, suggesting that practice may not have  
40 changed during this time.  
41  
42  
43

#### 44 **Research Implications**

45 Our initial risk factor model took into account PWE of all ages. However, as the main causes of death  
46 differ between younger and older PWE, risk factors may also be different. Thus, we repeated the  
47 analysis including PWE under the age of 35. Fewer of the variables were included in this model with  
48 the main differences being in lower ORs for having no AED prescription and being seizure free. The  
49 highest excess mortality due to epilepsy has been observed in younger people.<sup>15</sup> This would benefit  
50 from more research aiming to identify specific risks in younger PWE, particularly as we found epilepsy  
51 contributed to close to 50% of deaths in some younger age groups. We also did not evaluate potential  
52 causes of epilepsy, such as whether stroke or tumours preceded an epilepsy diagnosis, and whether  
53 this would impact mortality. In addition, the analysis may benefit from being repeated with more  
54 recent data from the CPRD and ONS.  
55  
56  
57  
58  
59  
60

## CONCLUSION

Several reports, including ours, have shown deaths in epilepsy continue to rise. Epilepsy is deemed a contributing cause of death particularly in young PWE, but less so in those over 65. While epilepsy in older people may be better controlled with AEDs, co-morbidity may mask the impact of epilepsy. We found certain factors are associated with risk of death such as emergency department attendance for epilepsy and admission, AED polytherapy, depression, and injuries. These could be addressed with clinical intervention and more information for self-management.

## FUNDING

This work was partly funded by SUDEP Action (award number not applicable).

## AUTHOR CONTRIBUTIONS

GW conducted the study, statistical analysis, and write-up of manuscript. MG contributed to the study design, supported the statistical analysis, and write-up. MA contributed to the study design and write-up. MPR contributed to study design. LR contributed to the study design, interpretation, and write-up of findings.

## COMPETING INTERESTS

The authors declare no competing interests.

## DATA SHARING STATEMENT

This study uses data that is obtained from the CPRD. Requests for data must be approved via the CPRD's Research Data Governance process (formerly the Independent Scientific Advisory Committee).

## ETHICS STATEMENT

This study was approved by the CPRD Independent Scientific Advisory Committee (protocol reference: 17\_208R2).

## Figure caption

Figure 1. Flowchart of participant selection

## References

1. World Health Organization. Epilepsy 2019 [updated 20/06/2019. Available from: <https://www.who.int/news-room/fact-sheets/detail/epilepsy> accessed 26/11/2020.
2. Duncan JS, Sander JW, Sisodiya SM, et al. Adult epilepsy. *Lancet* 2006;367(9516):1087-100. doi: <http://dx.doi.org/10.1016/S0140-6736%2806%2968477-8>
3. Thurman DJ, Logroscino G, Beghi E, et al. The burden of premature mortality of epilepsy in high-income countries: A systematic review from the Mortality Task Force of the International League Against Epilepsy. *Epilepsia* 2017;58(1):17-26. doi: <https://doi.org/10.1111/epi.13604>
4. Neligan A, Bell GS, Shorvon SD, et al. Temporal trends in the mortality of people with epilepsy: a review. *Epilepsia* 2010;51(11):2241-6. doi: 10.1111/j.1528-1167.2010.02711.x
5. Fazel S, Wolf A, Langstrom N, et al. Premature mortality in epilepsy and the role of psychiatric comorbidity: a total population study. *Lancet* 2013;382(9905):1646-54. doi: 10.1016/S0140-6736(13)60899-5
6. Quintana M, Sánchez-López J, Mazuela G, et al. Incidence and mortality in adults with epilepsy in northern Spain. *Acta Neurologica Scandinavica*;n/a(n/a) doi: <https://doi.org/10.1111/ane.13349> [published Online First: 24/09/2020]
7. Trinka E, Bauer G, Oberaigner W, et al. Cause-specific mortality among patients with epilepsy: results from a 30-year cohort study. *Epilepsia* 2013;54(3):495-501. doi: 10.1111/epi.12014 [published Online First: 2012/11/22]
8. DeGiorgio CM, Curtis A, Carapetian A, et al. Why are epilepsy mortality rates rising in the United States? A population-based multiple cause-of-death study. *BMJ Open* 2020;10(8):e035767. doi: 10.1136/bmjopen-2019-035767
9. Nilsson L, Tomson T, Farahmand BY, et al. Cause-specific mortality in epilepsy: a cohort study of more than 9,000 patients once hospitalized for epilepsy. *Epilepsia* 1997;38(10):1062-8. doi: 10.1111/j.1528-1157.1997.tb01194.x
10. Mbizvo GK, Bennett K, Simpson CR, et al. Epilepsy-related and other causes of mortality in people with epilepsy: A systematic review of systematic reviews. *Epilepsy Res* 2019;157:106192. doi: 10.1016/j.eplepsyres.2019.106192
11. Public Health England. Deaths Associated with Neurological Conditions in England, 2001 to 2014. London, UK: Public Health England, 2018.
12. Greenlund SF, Croft JB, Kobau R. Epilepsy by the Numbers: Epilepsy deaths by age, race/ethnicity, and gender in the United States significantly increased from 2005 to 2014. *Epilepsy Behav* 2017;69:28-30. doi: 10.1016/j.yebeh.2017.01.016
13. Keezer MR, Bell GS, Neligan A, et al. Cause of death and predictors of mortality in a community-based cohort of people with epilepsy. *Neurology* 2016;86(8):704-12. doi: 10.1212/WNL.0000000000002390
14. Morgan CL, Kerr MP. Epilepsy and mortality: a record linkage study in a U.K. population. *Epilepsia* 2002;43(10):1251-5. doi: 10.1046/j.1528-1157.2002.38701.x
15. Mohanraj R, Norrie J, Stephen LJ, et al. Mortality in adults with newly diagnosed and chronic epilepsy: a retrospective comparative study. *Lancet Neurology* 2006;5(6):481-87. doi: 10.1016/s1474-4422(06)70448-3
16. Ridsdale L, Charlton J, Ashworth M, et al. Epilepsy mortality and risk factors for death in epilepsy: a population-based study. *Br J Gen Pract* 2011;61(586):e271-8. doi: 10.3399/bjgp11X572463
17. Herrett E, Gallagher AM, Bhaskaran K, et al. Data Resource Profile: Clinical Practice Research Datalink (CPRD). *International Journal of Epidemiology* 2015;44(3):827-36. doi: 10.1093/ije/dyv098
18. The Health and Social Care Information Centre. QOF 2004/05 background 2012.
19. Fonferko-Shadrach B, Lacey AS, White CP, et al. Validating epilepsy diagnoses in routinely collected data. *Seizure* 2017;52:195-98. doi: 10.1016/j.seizure.2017.10.008 [published Online First: 2017/10/13]



20. Booth HP, Prevost AT, Gulliford MC. Validity of smoking prevalence estimates from primary care electronic health records compared with national population survey data for England, 2007 to 2011. *Pharmacoepidemiol Drug Saf* 2013;22(12):1357-61. doi: 10.1002/pds.3537
21. Neligan A, Bell GS, Johnson AL, et al. The long-term risk of premature mortality in people with epilepsy. *Brain* 2011;134(Pt 2):388-95. doi: 10.1093/brain/awq378
22. Lhatoo SD, Johnson AL, Goodridge DM, et al. Mortality in epilepsy in the first 11 to 14 years after diagnosis: multivariate analysis of a long-term, prospective, population-based cohort. *Ann Neurol* 2001;49(3):336-44. [published Online First: 2001/03/23]
23. Sen A, Jette N, Husain M, et al. Epilepsy in older people. *Lancet* 2020;395(10225):735-48. doi: 10.1016/S0140-6736(19)33064-8
24. Sen A, Capelli V, Husain M. Cognition and dementia in older patients with epilepsy. *Brain* 2018;141(6):1592-608. doi: <http://dx.doi.org/10.1093/brain/awy022>
25. Johnston A, Smith P. Epilepsy in the older patient. *Reviews in Clinical Gerontology* 2007;17(2):109-18. doi: <http://dx.doi.org/10.1017/S0959259808002414>
26. Devinsky O, Hesdorffer DC, Thurman DJ, et al. Sudden unexpected death in epilepsy: epidemiology, mechanisms, and prevention. *Lancet Neurology* 2016;15(10):1075-88.
27. Rafnsson V, Olafsson E, Hauser WA, et al. Cause-specific mortality in adults with unprovoked seizures - A population-based incidence cohort study. *Neuroepidemiology* 2001;20(4):232-36. doi: 10.1159/000054795
28. Blank LJ, Acton EK, Willis AW. Predictors of mortality in older adults with epilepsy: Implications for learning health systems. *Neurology* 2020 doi: 10.1212/WNL.0000000000011079
29. Lip GY, Brodie MJ. Sudden death in epilepsy: an avoidable outcome? *J R Soc Med* 1992;85(10):609-11.
30. Faught E, Duh MS, Weiner JR, et al. Nonadherence to antiepileptic drugs and increased mortality. *Findings from the RANSOM Study* 2008;71(20):1572-78. doi: 10.1212/01.wnl.0000319693.10338.b9
31. McKinlay A, Morgan M, Noble A, et al. Patient views on use of emergency and alternative care services for adult epilepsy: A qualitative study. *Seizure* 2020;80:56-62. doi: 10.1016/j.seizure.2020.04.011
32. Noble AJ, Morgan M, Viridi C, et al. A nurse-led self-management intervention for people who attend emergency departments with epilepsy: the patients' view. *J Neurol* 2013;260(4):1022-30. doi: 10.1007/s00415-012-6749-2
33. Shohet C, Yelloly J, Bingham P, et al. The association between the quality of epilepsy management in primary care, general practice population deprivation status and epilepsy-related emergency hospitalisations. *Seizure* 2007;16(4):351-5. doi: 10.1016/j.seizure.2007.02.005
34. Dixon PA, Kirkham JJ, Marson AG, et al. National Audit of Seizure management in Hospitals (NASH): Results of the national audit of adult epilepsy in the UK. *BMJ Open* 2015;5 (3) (no pagination)(e007325) doi: <http://dx.doi.org/10.1136/bmjopen-2014-007325>
35. Wojewodka G, McKinlay A, Ridsdale L. Best care for older people with epilepsy: A scoping review. *Seizure* 2021;85:70-89. doi: 10.1016/j.seizure.2020.12.007 [published Online First: 2021/01/16]
36. Tellez-Zenteno JF, Patten SB, Jetté N, et al. Psychiatric comorbidity in epilepsy: a population-based analysis. *Epilepsia* 2007;48(12):2336-44. doi: 10.1111/j.1528-1167.2007.01222.x [published Online First: 2007/07/31]
37. Scott AJ, Sharpe L, Hunt C, et al. Anxiety and depressive disorders in people with epilepsy: A meta-analysis. *Epilepsia* 2017;58(6):973-82. doi: 10.1111/epi.13769
38. Ridsdale L, Wojewodka G, Robinson E, et al. Characteristics associated with quality of life among people with drug-resistant epilepsy. *Journal of Neurology* 2017;264(6):1174-84. doi: 10.1007/s00415-017-8512-1



- 1  
2  
3 39. Dilorio C, Shafer PO, Letz R, et al. Behavioral, social, and affective factors associated with self-  
4 efficacy for self-management among people with epilepsy. *Epilepsy Behav* 2006;9(1):158-63.  
5 doi: 10.1016/j.yebeh.2006.05.001  
6  
7 40. Neurological Alliance. Parity of Esteem. UK, 2017.  
8 41. Trinka E, Hofler J, Zerbs A. Causes of status epilepticus. *Epilepsia* 2012;53 Suppl 4:127-38. doi:  
9 10.1111/j.1528-1167.2012.03622.x  
10 42. Tan M, Wilson I, Braganza V, et al. Development and validation of an epidemiologic case  
11 definition of epilepsy for use with routinely collected Australian health data. *Epilepsy Behav*  
12 2015;51:65-72. doi: 10.1016/j.yebeh.2015.06.031 [published Online First: 2015/08/12]  
13 43. Marston L, Carpenter JR, Walters KR, et al. Issues in multiple imputation of missing data for large  
14 general practice clinical databases. *Pharmacoepidemiol Drug Saf* 2010;19(6):618-26. doi:  
15 10.1002/pds.1934 [published Online First: 2010/03/23]  
16 44. Steele AJ, Denaxas SC, Shah AD, et al. Machine learning models in electronic health records can  
17 outperform conventional survival models for predicting patient mortality in coronary artery  
18 disease. *PLoS One* 2018;13(8):e0202344. doi: 10.1371/journal.pone.0202344 [published  
19 Online First: 2018/09/01]  
20 45. Dunn N, Holmes C, Mullee M. Does lithium therapy protect against the onset of dementia?  
21 *Alzheimer Dis Assoc Disord* 2005;19(1):20-2. doi: 10.1097/01.wad.0000155068.23937.9b  
22 [published Online First: 2005/03/15]  
23 46. Khan NF, Harrison SE, Rose PW. Validity of diagnostic coding within the General Practice  
24 Research Database: a systematic review. *Br J Gen Pract* 2010;60(572):e128-36. doi:  
25 10.3399/bjgp10X483562 [published Online First: 2010/03/06]  
26 47. Jick H, Jick SS, Derby LE. Validation of information recorded on general practitioner based  
27 computerised data resource in the United Kingdom. *Bmj* 1991;302(6779):766-8. doi:  
28 10.1136/bmj.302.6779.766 [published Online First: 1991/03/30]  
29 48. Health and Social Care Information Centre. National Quality and Outcomes Framework Statistics  
30 for England 2004/05: Health and Social Care Information Centre, 2005.  
31 49. Prescribing and Primary Care Services HaSCIC. Quality and Outcomes Framework – Prevalence,  
32 Achievements and Exceptions Report. England 2013-2014., 2014.  
33 50. Hanna NJ, Black M, Sander JWS, et al. The National Sentinel Clinical Audit of Epilepsy-Related  
34 Death: Epilepsy – death in the shadows, 2002.  
35 51. Kim AS, Moffatt E, Ursell PC, et al. Sudden neurologic death masquerading as out-of-hospital  
36 sudden cardiac death. *Neurology* 2016;87(16):1669-73. doi:  
37 10.1212/wnl.0000000000003238 [published Online First: 2016/10/19]  
38  
39  
40  
41  
42  
43  
44  
45  
46  
47  
48  
49  
50  
51  
52  
53  
54  
55  
56  
57  
58  
59  
60

1  
2  
3  
4  
5  
6  
7  
8  
9  
10  
11  
12  
13  
14  
15  
16  
17  
18  
19  
20  
21  
22  
23  
24  
25  
26  
27  
28  
29  
30  
31  
32  
33  
34  
35  
36  
37  
38  
39  
40  
41  
42  
43  
44  
45  
46  
47  
48  
49  
50  
51  
52  
53  
54  
55  
56  
57  
58  
59  
60

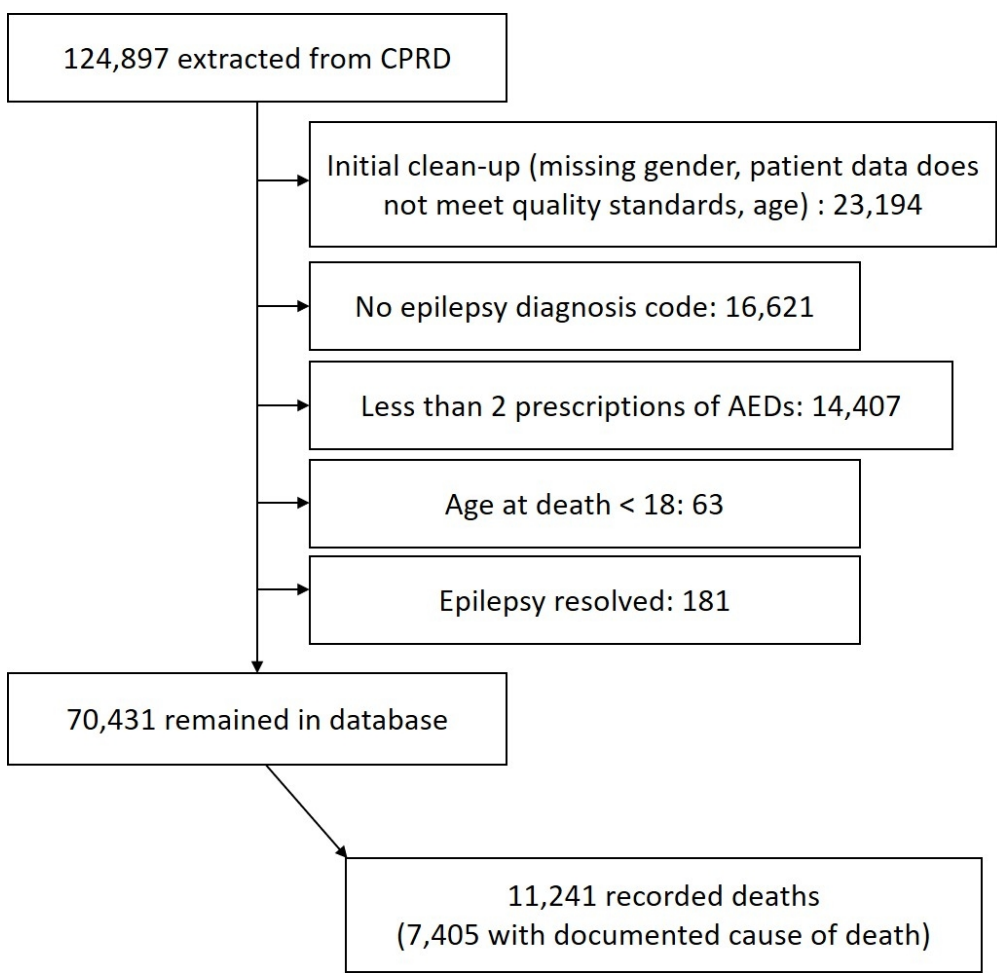

Figure 1. Flowchart of participant selection  
173x167mm (150 x 150 DPI)

## SUPPLEMENTAL FILE 1

## Codes used to identify epilepsy in the CPRD

Table S1. Codes used to identify epilepsy in the CPRD

| medcode | readcode | readterm                                              |
|---------|----------|-------------------------------------------------------|
| 573     | F25..00  | Epilepsy                                              |
| 85113   | F250 A   |                                                       |
| 11186   | F250.00  | Generalised nonconvulsive epilepsy                    |
| 2907    | F250000  | Petit mal (minor) epilepsy                            |
| 1715    | F250011  | Epileptic absences                                    |
| 24309   | F250200  | Epileptic seizures - atonic                           |
| 31830   | F250300  | Epileptic seizures - akinetic                         |
| 34792   | F250500  | Lennox-Gastaut syndrome                               |
| 59185   | F250y00  | Other specified generalised nonconvulsive epilepsy    |
| 44252   | F250z00  | Generalised nonconvulsive epilepsy NOS                |
| 26144   | F251.00  | Generalised convulsive epilepsy                       |
| 95216   | F2510    |                                                       |
| 988     | F251000  | Grand mal (major) epilepsy                            |
| 22804   | F251011  | Tonic-clonic epilepsy                                 |
| 49340   | F251111  | Otohara syndrome                                      |
| 18471   | F251200  | Epileptic seizures - clonic                           |
| 4801    | F251300  | Epileptic seizures - myoclonic                        |
| 5152    | F251400  | Epileptic seizures - tonic                            |
| 8187    | F251500  | Tonic-clonic epilepsy                                 |
| 45927   | F251y00  | Other specified generalised convulsive epilepsy       |
| 40806   | F251z00  | Generalised convulsive epilepsy NOS                   |
| 9886    | F252.00  | Petit mal status                                      |
| 5117    | F253.00  | Grand mal status                                      |
| 4093    | F253.11  | Status epilepticus                                    |
| 32288   | F254.00  | Partial epilepsy with impairment of consciousness     |
| 3175    | F254000  | Temporal lobe epilepsy                                |
| 23634   | F254100  | Psychomotor epilepsy                                  |
| 36203   | F254200  | Psychosensory epilepsy                                |
| 55665   | F254300  | Limbic system epilepsy                                |
| 34079   | F254400  | Epileptic automatism                                  |
| 11394   | F254500  | Complex partial epileptic seizure                     |
| 31920   | F254z00  | Partial epilepsy with impairment of consciousness NOS |
| 26015   | F255.00  | Partial epilepsy without impairment of consciousness  |
| 9569    | F255000  | Jacksonian, focal or motor epilepsy                   |
| 5525    | F255011  | Focal epilepsy                                        |
| 65699   | F255012  | Motor epilepsy                                        |

|        |         |                                                                  |
|--------|---------|------------------------------------------------------------------|
| 48134  | F255100 | Sensory induced epilepsy                                         |
| 73542  | F255300 | Visceral reflex epilepsy                                         |
| 98870  | F255311 | Partial epilepsy with autonomic symptoms                         |
| 55739  | F255400 | Visual reflex epilepsy                                           |
| 68946  | F255500 | Unilateral epilepsy                                              |
| 40105  | F255600 | Simple partial epileptic seizure                                 |
| 26733  | F255y00 | Partial epilepsy without impairment of consciousness OS          |
| 27526  | F255z00 | Partial epilepsy without impairment of consciousness NOS         |
| 71719  | F257.00 | Kojevnikov's epilepsy                                            |
| 30604  | F25B.00 | Alcohol-induced epilepsy                                         |
| 30816  | F25C.00 | Drug-induced epilepsy                                            |
| 56359  | F25D.00 | Menstrual epilepsy                                               |
| 65673  | F25E.00 | Stress-induced epilepsy                                          |
| 30635  | F25F.00 | Photosensitive epilepsy                                          |
| 106571 | F25H.00 | Generalised seizure                                              |
| 6271   | F25X.00 | Status epilepticus, unspecified                                  |
| 38307  | F25y.00 | Other forms of epilepsy                                          |
| 55260  | F25y000 | Cursive (running) epilepsy                                       |
| 53483  | F25y100 | Gelastic epilepsy                                                |
| 9887   | F25y200 | Local (focal) (partial) idiopathic epileptic seizure local onset |
| 25330  | F25y300 | Complex partial status epilepticus                               |
| 96641  | F25y500 | Panayiotopoulos syndrome                                         |
| 9979   | F25yz00 | Other forms of epilepsy NOS                                      |
| 9747   | F25z.00 | Epilepsy NOS                                                     |
| 3607   | F25z.11 | Fit (in known epileptic) NOS                                     |
| 99731  | Fyu5000 | [X]Other generalized epilepsy and epileptic syndromes            |
| 69831  | Fyu5100 | [X]Other epilepsy                                                |
| 59120  | Fyu5200 | [X]Other status epilepticus                                      |
| 71801  | Fyu5900 | [X>Status epilepticus, unspecified                               |
| 4109   | SC20000 | Traumatic epilepsy                                               |
| 37644  | F132100 | Progressive myoclonic epilepsy                                   |

### Definition of variables

Lists of Medcodes and corresponding Read codes used for each variable can be found in Supplemental file 2. An initial list of Read codes was created for each variable, either based on previous research or by searching specific words in a Read code browser. Medcodes were matched to the Read code list using the CPRD Medical Dictionary. An additional search of the Medcodes was conducted to ensure all appropriate codes were used. Medcodes were used during the analysis in STATA as these are numeric codes. For variables using medication data, lists of prodcodes were generated by searching the CPRD product code list, which lists prodcodes against British National Formulary (BNF) information.

- **Age:** For cases: age = year of death – year of birth. For matched controls: age = year of death of the matched case – year of birth.

For epilepsy related factors (ie. Relating to seizures and treatment) and lifestyle factors, data from the CPRD was used from the date of death of the matched case up to 12 months prior. These variables are listed below:

- **Emergency department visit or emergency admission:** Emergency admissions or visits to emergency centres were identified from “Clinical data” from CPRD. These included keywords: seen by emergency clinician, in accident and emergency, emergency admission. A full list is available in Supplemental File 2.
- **Number of antiepileptic drugs (AEDs):** Number of different types of AEDs prescribed in 12 months were grouped into categories: 0, 1, 2, 3 and “4 or more”. Product codes (“Prodcodes”) were used from “Therapy data” to identify AEDs in the CPRD. A full list of Prodcodes and corresponding definitions is available in Supplemental File 2.
- **Status epilepticus:** recorded status epilepticus code in previous 12 months (medcode: 4093; readcode: F253.11) clinical CPRD data.<sup>1</sup>
- **Depression:** the variable was coded as either a documented diagnostic medcode related to “depression” from “Clinical data” or a prescription of antidepressants from “Therapy data” in the previous 12 months.<sup>1</sup> Antidepressants were identified through their product codes (prodcode) from therapy data. A list of medcodes for depression and prodcodes for antidepressants can be found in Supplemental File 2.
- **Smoking status:** Data was coded from medcodes related to smoking or smoking cessation interventions from “Clinical data” and overall smoking status if available in the CPRD “Additional Files”. For any patients that did not have a smoking status recording in the 12-month data period, the last known recording from clinical data was used, as previously described by Booth et al.<sup>2</sup> The list of medcodes and readcodes used to identify smoking status can be found in Supplemental File 2.
- **Injury:** any injury documented in “Clinical data” was used. A list of medcodes from clinical CPRD data included: injuries, fractures, dislocations, burns, bruising, contusions, lacerations, abrasions, concussions and wounds.<sup>1</sup> A full list of medcodes and corresponding Read codes can be found in Supplemental File 2.
- **Seizure freedom:** recoded seizure freedom for > 12 months (medcode: 11015; readcode: 667F.00) in “Clinical data” from CPRD.<sup>1</sup>

**For co-morbidity, data coded for patient’s lifetime (within start and end dates with acceptable quality data recording):**

- **Dementia:** code list included any medcodes for “dementia” and “Alzheimer’s” in patient history from “Clinical data” in the CPRD. The list of medcodes and corresponding Read codes can be found in Supplemental File 2.

1  
2  
3  
4  
5  
6  
7  
8  
9  
10  
11  
12  
13  
14  
15  
16  
17  
18  
19  
20  
21  
22  
23  
24  
25  
26  
27  
28  
29  
30  
31  
32  
33  
34  
35  
36  
37  
38  
39  
40  
41  
42  
43  
44  
45  
46  
47  
48  
49  
50  
51  
52  
53  
54  
55  
56  
57  
58  
59  
60

- **Stroke:** code list included stroke, cerebral ischemia/arterial occlusion/haemorrhage/infarction. embolism in patient history from “Clinical data” in the CPRD. The list of medcodes and corresponding Read codes can be found in Supplemental File 2.

For peer review only

**Table S2.** Main cause of death of PWE registered in the CPRD between 2005 – 2013 by year

| ICD-10 category (ICD-10 code)                                                                     | 2005 (%)   | 2006 (%)   | 2007 (%)   | 2008 (%)   | 2009 (%)   | 2010 (%)   | 2011 (%)   | 2012 (%)   | 2013 (%)   |
|---------------------------------------------------------------------------------------------------|------------|------------|------------|------------|------------|------------|------------|------------|------------|
| Epilepsy (G40-G41)                                                                                | 6.3        | 6.3        | 5.9        | 6.1        | 5.7        | 6.2        | 5.2        | 7.1        | 5.2        |
| Certain infectious and parasitic diseases (A00-B99)                                               | 1.0        | 1.6        | 1.1        | 1.0        | 0.7        | 0.9        | 0.5        | 1.2        | 0.5        |
| Neoplasms (C00-D48)                                                                               | 20.9       | 19.4       | 17.6       | 19.6       | 19.0       | 18.1       | 21.8       | 21.4       | 20.9       |
| Diseases of the blood and blood-forming organs (D50-D89)                                          | 0.6        | 0.0        | 0.4        | 0.3        | 0.1        | 0.0        | 0.2        | 0.3        | 0.3        |
| Endocrine, nutritional and metabolic diseases (E00-E90)                                           | 1.5        | 1.7        | 1.7        | 1.1        | 1.6        | 1.7        | 1.1        | 1.0        | 1.1        |
| Mental and behavioural disorders (F00-F99)                                                        | 4.6        | 3.8        | 5.8        | 5.0        | 6.6        | 4.5        | 10.7       | 10.9       | 10.5       |
| Diseases of the nervous system (G00-G37, G43-G99)                                                 | 4.6        | 5.1        | 5.1        | 6.0        | 7.5        | 5.5        | 7.3        | 5.6        | 7.2        |
| Diseases of the circulatory system (I00-I99)                                                      | 33.8       | 35.1       | 34.0       | 34.0       | 31.3       | 33.1       | 28.3       | 26.8       | 28.1       |
| Diseases of the respiratory system (J00-J99)                                                      | 12.9       | 16.3       | 14.7       | 13.6       | 13.0       | 14.5       | 12.6       | 12.7       | 12.5       |
| Diseases of the digestive system (K00-KK93)                                                       | 3.8        | 3.3        | 4.3        | 4.6        | 4.1        | 4.8        | 4.9        | 4.9        | 5.0        |
| Diseases of the skin and subcutaneous tissue (L00-L99)                                            | 0.0        | 0.1        | 0.5        | 0.3        | 0.4        | 0.3        | 0.1        | 0.0        | 0.1        |
| Diseases of the musculoskeletal system and connective tissue (M00-M99)                            | 0.4        | 0.0        | 0.8        | 0.3        | 1.2        | 0.2        | 0.7        | 0.4        | 0.8        |
| Diseases of the genitourinary system (N00-N99)                                                    | 2.9        | 2.5        | 2.4        | 1.8        | 2.8        | 3.1        | 0.7        | 2.1        | 1.2        |
| Congenital malformations, deformations and chromosomal abnormalities (Q00-Q99)                    | 1.5        | 1.5        | 1.1        | 1.5        | 1.6        | 0.9        | 0.8        | 0.8        | 1.1        |
| Symptoms, signs and abnormal clinical and laboratory findings, not elsewhere classified (R00-R99) | 1.5        | 1.3        | 1.8        | 1.7        | 1.0        | 2.3        | 1.7        | 1.8        | 1.0        |
| External causes of morbidity and mortality (V01-X59, X85-Y98)                                     | 3.3        | 1.6        | 2.6        | 2.8        | 3.1        | 3.1        | 3.2        | 2.6        | 3.5        |
| External causes of morbidity and mortality (intentional) (X60-X84)                                | 0.4        | 0.4        | 0.1        | 0.4        | 0.4        | 0.8        | 0.2        | 0.3        | 1.0        |
| <b>Total (n)</b>                                                                                  | <b>521</b> | <b>687</b> | <b>761</b> | <b>785</b> | <b>836</b> | <b>874</b> | <b>886</b> | <b>956</b> | <b>987</b> |



1  
2  
3  
4  
5  
6  
7  
8  
9  
10  
11  
12  
13  
14  
15  
16  
17  
18  
19  
20  
21  
22  
23  
24  
25  
26  
27  
28  
29  
30  
31  
32  
33  
34  
35  
36  
37  
38  
39  
40  
41  
42  
43  
44  
45  
46  
47  
48  
49  
50  
51  
52  
53  
54  
55  
56  
57  
58  
59  
60

References

1. Ridsdale L, Charlton J, Ashworth M, et al. Epilepsy mortality and risk factors for death in epilepsy: a population-based study. *Br J Gen Pract* 2011;61(586):e271-8. doi: 10.3399/bjgp11X572463
2. Booth HP, Prevost AT, Gulliford MC. Validity of smoking prevalence estimates from primary care electronic health records compared with national population survey data for England, 2007 to 2011. *Pharmacoepidemiol Drug Saf* 2013;22(12):1357-61. doi: 10.1002/pds.3537

For peer review only

**medcode readcode**

1  
2  
3 33707 E00..00  
4 1916 E00..11  
5 1350 E00..12  
6 7323 E000.00  
7  
8 15165 E001.00  
9 42602 E001000  
10 49513 E001100  
11 30032 E001200  
12 27677 E001300  
13 38438 E001z00  
14 44674 E002.00  
15 18386 E002000  
16 21887 E002100  
17 41089 E002z00  
18 37015 E003.00  
19 7664 Eu00.00  
20 49263 Eu00000  
21 25704 Eu00011  
22 60059 Eu00012  
23 61528 Eu00013  
24 38678 Eu00100  
25 46762 Eu00111  
26 11379 Eu00112  
27 43346 Eu00113  
28 30706 Eu00200  
29 29386 Eu00z00  
30 4693 Eu02z00  
31 48501 Eu02z11  
32 4357 Eu02z14  
33 5931 1461  
34 104155 1JA2.00  
35 1917 F110.00  
36 16797 F110000  
37 32057 F110100  
38 92341 R20z.00  
39  
40  
41  
42  
43  
44  
45  
46  
47  
48  
49  
50  
51  
52  
53  
54  
55  
56  
57  
58  
59  
60

1  
2 **readterm**  
3 Senile and presenile organic psychotic conditions  
4 Senile dementia  
5 Senile/presenile dementia  
6 Uncomplicated senile dementia  
7 Presenile dementia  
8 Uncomplicated presenile dementia  
9 Presenile dementia with delirium  
10 Presenile dementia with paranoia  
11 Presenile dementia with depression  
12 Presenile dementia NOS  
13 Senile dementia with depressive or paranoid features  
14 Senile dementia with paranoia  
15 Senile dementia with depression  
16 Senile dementia with depressive or paranoid features NOS  
17 Senile dementia with delirium  
18 [X]Dementia in Alzheimer's disease  
19 [X]Dementia in Alzheimer's disease with early onset  
20 [X]Presenile dementia,Alzheimer's type  
21 [X]Primary degen dementia, Alzheimer's type, presenile onset  
22 [X]Alzheimer's disease type 2  
23 [X]Dementia in Alzheimer's disease with late onset  
24 [X]Alzheimer's disease type 1  
25 [X]Senile dementia,Alzheimer's type  
26 [X]Primary degen dementia of Alzheimer's type, senile onset  
27 [X]Dementia in Alzheimer's dis, atypical or mixed type  
28 [X]Dementia in Alzheimer's disease, unspecified  
29 [X] Unspecified dementia  
30 [X] Presenile dementia NOS  
31 [X] Senile dementia NOS  
32 H/O: dementia  
33 Suspected dementia  
34 Alzheimer's disease  
35 Alzheimer's disease with early onset  
36 Alzheimer's disease with late onset  
37 [D]Senility, without psychosis NOS  
38  
39  
40  
41  
42  
43  
44  
45  
46  
47  
48  
49  
50  
51  
52  
53  
54  
55  
56  
57  
58  
59  
60

1  
2 **medcode readcode**  
3 23671 G63y000  
4 24446 G63y100  
5 71585 G63z.00  
6 8837 G64..00  
7 5363 G64..11  
8 569 G64..12  
9 6155 G64..13  
10 16517 G640.00  
11 36717 G640000  
12 15019 G641.00  
13 34758 G641.11  
14 27975 G641000  
15 3149 G64z.00  
16 15252 G64z.11  
17 5602 G64z.12  
18 25615 G64z000  
19 39693 G31y200  
20 504 G65..00  
21 1895 G65z.00  
22 15788 G65zz00  
23 16507 G65z100  
24 24385 G671100  
25 66873 14AK.00  
26 102554 1JA1011  
27 5871 14A7.12  
28 6253 G66..12  
29 18604 G61..12  
30 9985 G64z200  
31 10504 G64z300  
32 26424 G64z400  
33 1433 G65..12  
34 19354 G65y.00  
35 1469 G66..00  
36 1298 G66..11  
37 6116 G66..13  
38 8443 G663.00  
39 17322 G664.00  
40 7780 G667.00  
41 12833 G668.00  
42 39403 G683.00  
43 44740 G680.00  
44 48149 G681.00  
45 43451 G682.00  
46 51138 G68W.00  
47 6228 G68X.00  
48 40758 G6W..00  
49 33543 G6X..00  
50 57495 G63..11  
51 2418 G6...00

1  
2 1786 G60..00  
3 29939 G600.00  
4 56007 G601.00  
5 19412 G602.00  
6 42331 G603.00  
7 9696 G604.00  
8 41910 G605.00  
9 60692 G606.00  
10 17326 G60X.00  
11 23580 G60z.00  
12 5051 G61..00  
13 6960 G61..11  
14 31595 G610.00  
15 40338 G611.00  
16 46316 G612.00  
17 13564 G613.00  
18 7912 G614.00  
19 62342 G615.00  
20 30045 G616.00  
21 30202 G617.00  
22 57315 G618.00  
23 107440 G619.00  
24 31060 G61X.00  
25 28314 G61X000  
26 19201 G61X100  
27 3535 G61z.00  
28 31805 G62..00  
29 36178 G620.00  
30 4273 G621.00  
31 17734 G622.00  
32 18912 G623.00  
33 20284 G62z.00  
34  
35  
36  
37  
38  
39  
40  
41  
42  
43  
44  
45  
46  
47  
48  
49  
50  
51  
52  
53  
54  
55  
56  
57  
58  
59  
60

For peer review only

**readterm**

1  
2  
3 Cerebral infarct due to thrombosis of precerebral arteries  
4 Cerebral infarction due to embolism of precerebral arteries  
5 Precerebral artery occlusion NOS  
6 Cerebral arterial occlusion  
7  
8 CVA - cerebral artery occlusion  
9 Infarction - cerebral  
10 Stroke due to cerebral arterial occlusion  
11 Cerebral thrombosis  
12 Cerebral infarction due to thrombosis of cerebral arteries  
13 Cerebral embolism  
14 Cerebral embolus  
15 Cerebral infarction due to embolism of cerebral arteries  
16 Cerebral infarction NOS  
17 Brainstem infarction NOS  
18 Cerebellar infarction  
19 Brainstem infarction  
20 Subendocardial ischaemia  
21 Transient cerebral ischaemia  
22 Transient cerebral ischaemia NOS  
23 Transient cerebral ischaemia NOS  
24 Intermittent cerebral ischaemia  
25 Chronic cerebral ischaemia  
26 H/O: Stroke in last year  
27 Suspected stroke  
28 H/O: stroke  
29 Stroke unspecified  
30 Stroke due to intracerebral haemorrhage  
31 Left sided cerebral infarction  
32 Right sided cerebral infarction  
33 Infarction of basal ganglia  
34 Transient ischaemic attack  
35 Other transient cerebral ischaemia  
36 Stroke and cerebrovascular accident unspecified  
37 CVA unspecified  
38 CVA - Cerebrovascular accident unspecified  
39 Brain stem stroke syndrome  
40 Cerebellar stroke syndrome  
41 Left sided CVA  
42 Right sided CVA  
43 Sequelae of cerebral infarction  
44 Sequelae of subarachnoid haemorrhage  
45 Sequelae of intracerebral haemorrhage  
46 Sequelae of other nontraumatic intracranial haemorrhage  
47 Sequelae/other + unspecified cerebrovascular diseases  
48 Sequelae of stroke,not specfd as h'morrhage or infarction  
49 Cereb infarct due unsp occlus/stenos precerebr arteries  
50 Cerebrl infarctn due/unspcf occlusn or sten/cerebrl artr  
51 Infarction - precerebral  
52 Cerebrovascular disease

1 Subarachnoid haemorrhage  
2 Ruptured berry aneurysm  
3 Subarachnoid haemorrhage from carotid siphon and bifurcation  
4 Subarachnoid haemorrhage from middle cerebral artery  
5 Subarachnoid haemorrhage from anterior communicating artery  
6 Subarachnoid haemorrhage from posterior communicating artery  
7 Subarachnoid haemorrhage from basilar artery  
8 Subarachnoid haemorrhage from vertebral artery  
9 Subarachnoid haemorrh from intracranial artery, unspecif  
10 Subarachnoid haemorrhage NOS  
11 Intracerebral haemorrhage  
12 CVA - cerebrovascular accid due to intracerebral haemorrhage  
13 Cortical haemorrhage  
14 Internal capsule haemorrhage  
15 Basal nucleus haemorrhage  
16 Cerebellar haemorrhage  
17 Pontine haemorrhage  
18 Bulbar haemorrhage  
19 External capsule haemorrhage  
20 Intracerebral haemorrhage, intraventricular  
21 Intracerebral haemorrhage, multiple localized  
22 Lobar cerebral haemorrhage  
23 Intracerebral haemorrhage in hemisphere, unspecified  
24 Left sided intracerebral haemorrhage, unspecified  
25 Right sided intracerebral haemorrhage, unspecified  
26 Intracerebral haemorrhage NOS  
27 Other and unspecified intracranial haemorrhage  
28 Extradural haemorrhage - nontraumatic  
29 Subdural haemorrhage - nontraumatic  
30 Subdural haematoma - nontraumatic  
31 Subdural haemorrhage NOS  
32 Intracranial haemorrhage NOS  
33  
34  
35  
36  
37  
38  
39  
40  
41  
42  
43  
44  
45  
46  
47  
48  
49  
50  
51  
52  
53  
54  
55  
56  
57  
58  
59  
60



|    | <b>medcode</b> | <b>readcode</b> | <b>readterm</b>                                            |
|----|----------------|-----------------|------------------------------------------------------------|
| 1  |                |                 |                                                            |
| 2  |                |                 |                                                            |
| 3  | 16632          | E291.00         | Prolonged depressive reaction                              |
| 4  | 15099          | E113.00         | Recurrent major depressive episode                         |
| 5  | 10610          | E112.00         | Single major depressive episode                            |
| 6  |                |                 |                                                            |
| 7  | 11717          | Eu32000         | [X]Mild depressive episode                                 |
| 8  | 15219          | E112300         | Single major depressive episode, severe, without psychosis |
| 9  | 10438          | 1B1U.11         | Depressive symptoms                                        |
| 10 | 6546           | E112.12         | Endogenous depression first episode                        |
| 11 | 595            | E112.14         | Endogenous depression                                      |
| 12 |                |                 |                                                            |
| 13 | 14709          | E113200         | Recurrent major depressive episodes, moderate              |
| 14 | 6950           | E112.13         | Endogenous depression first episode                        |
| 15 | 6932           | E113.11         | Endogenous depression - recurrent                          |
| 16 | 9667           | Eu32200         | [X]Severe depressive episode without psychotic symptoms    |
| 17 | 5879           | E112.11         | Agitated depression                                        |
| 18 |                |                 |                                                            |
| 19 | 4323           | E2B1.00         | Chronic depression                                         |
| 20 | 11913          | Eu41200         | [X]Mixed anxiety and depressive disorder                   |
| 21 | 1908           | 2257            | O/E - depressed                                            |
| 22 | 1131           | E204.00         | Neurotic depression reactive type                          |
| 23 |                |                 |                                                            |
| 24 | 34390          | E112000         | Single major depressive episode, unspecified               |
| 25 | 543            | Eu32z11         | [X]Depression NOS                                          |
| 26 | 25697          | E113300         | Recurrent major depressive episodes, severe, no psychosis  |
| 27 | 2716           | 1465            | H/O: depression                                            |
| 28 | 16506          | E112100         | Single major depressive episode, mild                      |
| 29 | 7011           | E112z00         | Single major depressive episode NOS                        |
| 30 |                |                 |                                                            |
| 31 | 9211           | Eu32100         | [X]Moderate depressive episode                             |
| 32 | 6482           | E113700         | Recurrent depression                                       |
| 33 | 655            | E200300         | Anxiety with depression                                    |
| 34 | 25563          | E113z00         | Recurrent major depressive episode NOS                     |
| 35 | 8851           | Eu33.11         | [X]Recurrent episodes of depressive reaction               |
| 36 |                |                 |                                                            |
| 37 | 29342          | E113100         | Recurrent major depressive episodes, mild                  |
| 38 | 324            | E2B..00         | Depressive disorder NEC                                    |
| 39 | 15155          | E112200         | Single major depressive episode, moderate                  |
| 40 | 1055           | E135.00         | Agitated depression                                        |
| 41 | 10290          | Eu34112         | [X]Depressive personality disorder                         |
| 42 |                |                 |                                                            |
| 43 | 36246          | E290z00         | Brief depressive reaction NOS                              |
| 44 | 35671          | E113000         | Recurrent major depressive episodes, unspecified           |
| 45 | 107657         | 115X.00         | No history of depression                                   |
| 46 |                |                 |                                                            |
| 47 |                |                 |                                                            |
| 48 |                |                 |                                                            |
| 49 |                |                 |                                                            |
| 50 |                |                 |                                                            |
| 51 |                |                 |                                                            |
| 52 |                |                 |                                                            |
| 53 |                |                 |                                                            |
| 54 |                |                 |                                                            |
| 55 |                |                 |                                                            |
| 56 |                |                 |                                                            |
| 57 |                |                 |                                                            |
| 58 |                |                 |                                                            |
| 59 |                |                 |                                                            |
| 60 |                |                 |                                                            |

**prodcode productname**

40295 Valdoxan 25mg tablets (Servier Laboratories Ltd)  
40494 Agomelatine 25mg tablets  
182 Tryptizol 10mg/ml Injection (Merck Sharp & Dohme Ltd)  
19779 Amitriptyline 10mg/ml injection  
34503 Amitriptyline 25mg tablets (IVAX Pharmaceuticals UK Ltd)  
45233 Amitriptyline 10mg tablets (IVAX Pharmaceuticals UK Ltd)  
46970 Amitriptyline 50mg tablets (IVAX Pharmaceuticals UK Ltd)  
65439 Amitriptyline 25mg tablets (Sandoz Ltd)  
2525 Amitriptyline 75mg modified-release capsules  
3777 Amitriptyline 10mg/5ml sugar free oral solution  
7751 Tryptizol 25mg Tablet (Merck Sharp & Dohme Ltd)  
8332 Tryptizol 50mg Tablet (Merck Sharp & Dohme Ltd)  
8726 Tryptizol 10mg Tablet (Merck Sharp & Dohme Ltd)  
8831 Tryptizol mr 75mg Modified-release capsule (Merck Sharp & Dohme Ltd)  
8878 Tryptizol 10mg/5ml sugar free Oral solution (Merck Sharp and Dohme Ltd)  
20026 Domical 25mg Tablet (Berk Pharmaceuticals Ltd)  
22070 Amitriptyline 10mg/5ml Oral solution (Rosemont Pharmaceuticals Ltd)  
24680 Elavil 10mg Tablet (DDSA Pharmaceuticals Ltd)  
26213 Domical 10mg Tablet (Berk Pharmaceuticals Ltd)  
27008 Domical 50mg Tablet (Berk Pharmaceuticals Ltd)  
32439 Amitriptyline 25mg Tablet (Sussex Pharmaceutical Ltd)  
34197 Amitriptyline 25mg Tablet (Berk Pharmaceuticals Ltd)  
34474 Amitriptyline 25mg Tablet (Regent Laboratories Ltd)  
34916 Amitriptyline 10mg Tablet (Berk Pharmaceuticals Ltd)  
40396 Amitriptyline 50mg Tablet (Berk Pharmaceuticals Ltd)  
41729 Amitriptyline 25mg Tablet (Celltech Pharma Europe Ltd)  
42394 Amitriptyline 25mg Tablet (Crosspharma Ltd)  
45242 Amitriptyline 10mg Tablet (Sussex Pharmaceutical Ltd)  
48065 Amitriptyline oral solution  
49 Amitriptyline 25mg tablets  
83 Amitriptyline 10mg tablets  
1888 Amitriptyline 50mg tablets  
4690 Amitriptyline 50mg/5ml oral solution sugar free  
6312 Amitriptyline 25mg/5ml oral solution sugar free  
24134 Amitriptyline 25mg tablets (Kent Pharmaceuticals Ltd)  
24141 Amitriptyline 10mg tablets (Actavis UK Ltd)  
24145 Amitriptyline 25mg tablets (Actavis UK Ltd)  
24147 Amitriptyline 25mg tablets (Teva UK Ltd)  
24152 Amitriptyline 10mg tablets (Teva UK Ltd)  
33090 Amitriptyline 10mg tablets (A A H Pharmaceuticals Ltd)  
33624 Amitriptyline 50mg tablets (Teva UK Ltd)  
34107 Amitriptyline 50mg tablets (Wockhardt UK Ltd)  
34129 Amitriptyline 25mg tablets (Wockhardt UK Ltd)  
34182 Amitriptyline 50mg tablets (Kent Pharmaceuticals Ltd)  
34224 Amitriptyline 25mg/5ml oral solution sugar free (Rosemont Pharmaceuticals Ltd)  
34251 Amitriptyline 50mg/5ml oral solution sugar free (Rosemont Pharmaceuticals Ltd)  
34274 Amitriptyline 50mg tablets (A A H Pharmaceuticals Ltd)  
34401 Amitriptyline 10mg tablets (Wockhardt UK Ltd)  
34634 Amitriptyline 50mg tablets (Actavis UK Ltd)

1  
2 34731 Amitriptyline 10mg tablets (Kent Pharmaceuticals Ltd)  
3 34782 Amitriptyline 25mg tablets (A A H Pharmaceuticals Ltd)  
4 42078 Amitriptyline 25mg tablets (Almus Pharmaceuticals Ltd)  
5 46801 Amitriptyline 10mg/5ml oral solution  
6 46818 Amitriptyline 10mg/5ml oral suspension  
7  
8 52867 Amitriptyline 10mg tablets (Accord Healthcare Ltd)  
9 54877 Amitriptyline 25mg tablets (Accord Healthcare Ltd)  
10 55139 Amitriptyline 25mg tablets (Alliance Healthcare (Distribution) Ltd)  
11 55491 Amitriptyline 10mg tablets (Almus Pharmaceuticals Ltd)  
12 57107 Amitriptyline 10mg tablets (Phoenix Healthcare Distribution Ltd)  
13 57972 Amitriptyline 10mg tablets (Alliance Healthcare (Distribution) Ltd)  
14 59161 Amitriptyline 10mg tablets (Waymade Healthcare Plc)  
15 59820 Amitriptyline 50mg/5ml oral solution sugar free (Wockhardt UK Ltd)  
16 60355 Amitriptyline 25mg tablets (Phoenix Healthcare Distribution Ltd)  
17 60410 Amitriptyline 25mg/5ml oral solution sugar free (Wockhardt UK Ltd)  
18 61835 Amitriptyline 10mg tablets (DE Pharmaceuticals)  
19 64141 Amitriptyline 5mg/5ml oral solution  
20 64330 Amitriptyline 50mg tablets (Almus Pharmaceuticals Ltd)  
21 64647 Amitriptyline 25mg tablets (DE Pharmaceuticals)  
22 65879 Amitriptyline 10mg tablets (Sigma Pharmaceuticals Plc)  
23 65987 Amitriptyline 25mg tablets (Crescent Pharma Ltd)  
24 66572 Amitriptyline 25mg tablets (Sigma Pharmaceuticals Plc)  
25 66578 Amitriptyline 10mg tablets (Mawdsley-Brooks & Company Ltd)  
26 66579 Amitriptyline 25mg tablets (Mawdsley-Brooks & Company Ltd)  
27 11963 Limbitrol 10 Capsule (Roche Products Ltd)  
28 14534 Limbitrol 5 Capsule (Roche Products Ltd)  
29 18342 Amitriptyline 25mg / Chlordiazepoxide 10mg capsules  
30 21081 Amitriptyline 12.5mg / Chlordiazepoxide 5mg capsules  
31 595 Amitriptyline 25mg / Perphenazine 2mg tablets  
32 1208 Triptafen tablets (AMCo)  
33 3652 Amoxapine 100mg tablets  
34 4411 Amoxapine 150mg tablets  
35 14398 Asendis 50mg Tablet (Wyeth Pharmaceuticals)  
36 15380 Asendis 25mg Tablet (Wyeth Pharmaceuticals)  
37 17319 Amoxapine 25mg tablets  
38 21357 Asendis 100mg Tablet (Wyeth Pharmaceuticals)  
39 24723 Asendis 150mg Tablet (Wyeth Pharmaceuticals)  
40 8844 Tryptophan with ascorbic acid and pyridoxine powder  
41 12227 Butriptyline 25mg tablets  
42 18932 Evadyne 25mg Tablet (Wyeth Pharmaceuticals)  
43 32457 Butriptyline 50mg tablets  
44 67 Citalopram 20mg tablets  
45 476 Citalopram 10mg tablets  
46 1712 Cipramil 20mg tablets (Lundbeck Ltd)  
47 2408 Cipramil 40mg tablets (Lundbeck Ltd)  
48 3861 Cipramil 10mg tablets (Lundbeck Ltd)  
49 4770 Citalopram 40mg tablets  
50 26016 Citalopram 20mg tablets (Sandoz Ltd)  
51 29756 Paxoran 20mg Tablet (Ranbaxy (UK) Ltd)  
52 32546 Paxoran 10mg Tablet (Ranbaxy (UK) Ltd)

1  
2 32848 Citalopram 10mg tablets (Actavis UK Ltd)  
3 33720 Citalopram 10mg tablets (IVAX Pharmaceuticals UK Ltd)  
4 34356 Citalopram 20mg tablets (A A H Pharmaceuticals Ltd)  
5 34413 Citalopram 10mg tablets (Zentiva)  
6 34415 Citalopram 20mg tablets (Mylan Ltd)  
7 34436 Citalopram 10mg tablets (Mylan Ltd)  
8 34466 Citalopram 40mg tablets (Sandoz Ltd)  
9 34498 Citalopram 10mg Tablet (Neo Laboratories Ltd)  
10 34499 Citalopram 10mg tablets (Sandoz Ltd)  
11 34586 Citalopram 10mg tablets (A A H Pharmaceuticals Ltd)  
12 34603 Citalopram 40mg tablets (Mylan Ltd)  
13 34722 Citalopram 20mg Tablet (Neo Laboratories Ltd)  
14 34822 Citalopram 20mg tablets (Zentiva)  
15 34871 Citalopram 20mg tablets (Actavis UK Ltd)  
16 34966 Citalopram 20mg tablets (Teva UK Ltd)  
17 34970 Citalopram 20mg tablets (Niche Generics Ltd)  
18 36746 Citalopram 40mg tablets (A A H Pharmaceuticals Ltd)  
19 41528 Citalopram 10mg tablets (Teva UK Ltd)  
20 42660 Citalopram 10mg tablets (Almus Pharmaceuticals Ltd)  
21 43519 Citalopram 40mg Tablet (Neo Laboratories Ltd)  
22 45223 Citalopram 40mg tablets (Niche Generics Ltd)  
23 45286 Citalopram 10mg tablets (Niche Generics Ltd)  
24 45304 Citalopram 40mg tablets (Teva UK Ltd)  
25 46926 Citalopram 40mg tablets (Zentiva)  
26 46977 Citalopram 40mg tablets (Actavis UK Ltd)  
27 48026 Citalopram 20mg tablets (Almus Pharmaceuticals Ltd)  
28 49165 Citalopram 10mg tablets (Alliance Healthcare (Distribution) Ltd)  
29 52100 Citalopram 10mg tablets (Arrow Generics Ltd)  
30 52354 Citalopram 20mg tablets (DE Pharmaceuticals)  
31 52408 Citalopram 10mg tablets (Kent Pharmaceuticals Ltd)  
32 52607 Citalopram 20mg tablets (Bristol Laboratories Ltd)  
33 52824 Citalopram 10mg tablets (PLIVA Pharma Ltd)  
34 53394 Citalopram 20mg tablets (Alliance Healthcare (Distribution) Ltd)  
35 53787 Citalopram 10mg tablets (Bristol Laboratories Ltd)  
36 54827 Citalopram 10mg/5ml oral suspension  
37 55033 Citalopram 40mg tablets (DE Pharmaceuticals)  
38 56009 Citalopram 20mg tablets (Arrow Generics Ltd)  
39 56355 Citalopram 10mg tablets (Waymade Healthcare Plc)  
40 58476 Citalopram 20mg tablets (Aurobindo Pharma Ltd)  
41 59193 Citalopram 10mg tablets (Ranbaxy (UK) Ltd)  
42 59650 Citalopram 10mg tablets (Aurobindo Pharma Ltd)  
43 60568 Citalopram 20mg tablets (Waymade Healthcare Plc)  
44 60839 Citalopram 40mg tablets (Almus Pharmaceuticals Ltd)  
45 60888 Citalopram 10mg tablets (Sigma Pharmaceuticals Plc)  
46 63441 Citalopram 10mg tablets (Rivopharm (UK) Ltd)  
47 63953 Cipramil 20mg tablets (DE Pharmaceuticals)  
48 64423 Citalopram 10mg tablets (Accord Healthcare Ltd)  
49 513 Citalopram 40mg/ml oral drops sugar free  
50 815 Cipramil 40mg/ml drops (Lundbeck Ltd)  
51 56292 Citalopram 40mg/ml oral drops sugar free (Actavis UK Ltd)  
52  
53  
54  
55  
56  
57  
58  
59  
60

1  
2 57936 Citalopram 40mg/ml oral drops sugar free (A A H Pharmaceuticals Ltd)  
3 3194 Clomipramine 10mg capsules  
4 3657 Anafranil 25mg capsules (Novartis Pharmaceuticals UK Ltd)  
5 3670 Clomipramine 25mg capsules  
6 3925 Clomipramine 50mg capsules  
7 7515 Anafranil 10mg capsules (Novartis Pharmaceuticals UK Ltd)  
8 7693 Anafranil 50mg capsules (Novartis Pharmaceuticals UK Ltd)  
9 7894 Anafranil SR 75mg tablets (Novartis Pharmaceuticals UK Ltd)  
10 8661 Clomipramine 75mg modified-release tablets  
11 8719 Anafranil 25mg/5ml syrup (Novartis Pharmaceuticals UK Ltd)  
12 8720 Clomipramine 25mg/5ml oral solution  
13 34245 Clomipramine 25mg capsules (A A H Pharmaceuticals Ltd)  
14 34866 Clomipramine 10mg capsules (A A H Pharmaceuticals Ltd)  
15 38274 Clomipramine 50mg/5ml oral suspension  
16 41563 Clomipramine 25mg capsules (IVAX Pharmaceuticals UK Ltd)  
17 41597 Clomipramine 50mg capsules (IVAX Pharmaceuticals UK Ltd)  
18 41628 Clomipramine 10mg capsules (IVAX Pharmaceuticals UK Ltd)  
19 43561 Clomipramine 10mg capsules (Teva UK Ltd)  
20 45318 Clomipramine 50mg capsules (A A H Pharmaceuticals Ltd)  
21 45350 Clomipramine 25mg capsules (Teva UK Ltd)  
22 53161 Clomipramine 50mg/5ml oral solution  
23 53187 Clomipramine 50mg capsules (Kent Pharmaceuticals Ltd)  
24 62620 Clomipramine 10mg capsules (Mylan Ltd)  
25 64458 Clomipramine 25mg/5ml oral suspension  
26 65762 Clomipramine 25mg capsules (Waymade Healthcare Plc)  
27 65804 Clomipramine 50mg capsules (Teva UK Ltd)  
28 7979 Pertofran 25mg Tablet (Novartis Pharmaceuticals UK Ltd)  
29 7981 Desipramine 25mg tablets  
30 74 Dosulepin 75mg tablets  
31 84 Dosulepin 25mg capsules  
32 1169 Prothiaden 25mg capsules (Teofarma)  
33 1940 Dothapax 25 capsules (Ashbourne Pharmaceuticals Ltd)  
34 2320 Prothiaden 75mg tablets (Teofarma)  
35 6054 Dosulepin 25mg/5ml oral solution sugar free  
36 10948 Dosulepin 75mg/5ml oral solution sugar free  
37 15632 Dothapax 75 tablets (Ashbourne Pharmaceuticals Ltd)  
38 19168 Dosulepin 25mg/5ml mixture  
39 19186 Dosulepin 75mg tablets (Actavis UK Ltd)  
40 21157 Thaden 75mg tablets (Opus Pharmaceuticals Ltd)  
41 21819 Prepadine 75mg tablets (Teva UK Ltd)  
42 21820 Prepadine 25mg capsules (Teva UK Ltd)  
43 23426 Dosulepin 25mg capsules (A A H Pharmaceuticals Ltd)  
44 29875 Dosulepin 25mg capsules (Mylan Ltd)  
45 30376 Thaden 25mg capsules (Opus Pharmaceuticals Ltd)  
46 31824 Dosulepin 25mg capsules (IVAX Pharmaceuticals UK Ltd)  
47 31826 Dosulepin 75mg tablets (IVAX Pharmaceuticals UK Ltd)  
48 32121 Dosulepin 75mg tablets (A A H Pharmaceuticals Ltd)  
49 33164 Dosulepin 25mg capsules (Sandoz Ltd)  
50 34058 Dosulepin 75mg tablets (Teva UK Ltd)  
51 34223 Dosulepin 25mg capsules (Teva UK Ltd)  
52  
53  
54  
55  
56  
57  
58  
59  
60



1  
2 34525 Dosulepin 75mg tablets (Mylan Ltd)  
3 34641 Dosulepin 25mg capsules (Sovereign Medical Ltd)  
4 34643 Dosulepin 25mg capsules (Almus Pharmaceuticals Ltd)  
5 34745 Dosulepin 25mg capsules (Actavis UK Ltd)  
6 42734 Dosulepin 75mg tablets (Almus Pharmaceuticals Ltd)  
7 43024 Dosulepin 100mg/5ml oral solution  
8 44853 Dosulepin 25mg capsules (Kent Pharmaceuticals Ltd)  
9 45737 Dosulepin 25mg/5ml Oral solution (Rosemont Pharmaceuticals Ltd)  
10 50722 Dosulepin 25mg/5ml oral solution  
11 51758 Prothiaden 25mg capsules (Stephar (U.K.) Ltd)  
12 57926 Dosulepin 75mg/5ml oral solution  
13 62681 Dosulepin 75mg tablets (Sandoz Ltd)  
14 3554 Doxepin 25mg capsules  
15 3842 Doxepin 10mg capsules  
16 5073 Doxepin 50mg capsules  
17 7059 Doxepin 75mg capsules  
18 10413 Sinequan 10mg capsules (Pfizer Ltd)  
19 12125 Sinequan 50mg capsules (Pfizer Ltd)  
20 12129 Sinequan 25mg capsules (Pfizer Ltd)  
21 14519 Sinequan 75mg capsules (Pfizer Ltd)  
22 35258 Sinopin 25mg capsules (Marlborough Pharmaceuticals Ltd)  
23 35493 Sinopin 50mg capsules (Marlborough Pharmaceuticals Ltd)  
24 40777 Doxepin 25mg/5ml oral suspension  
25 6895 Duloxetine 60mg gastro-resistant capsules  
26 7122 Duloxetine 30mg gastro-resistant capsules  
27 13151 Cymbalta 30mg gastro-resistant capsules (Eli Lilly and Company Ltd)  
28 14849 Cymbalta 60mg gastro-resistant capsules (Eli Lilly and Company Ltd)  
29 51383 Duloxetine 60mg gastro-resistant capsules (Sigma Pharmaceuticals Plc)  
30 62688 Duloxetine 30mg gastro-resistant capsules (Sigma Pharmaceuticals Plc)  
31 63216 Cymbalta 60mg gastro-resistant capsules (Mawdsley-Brooks & Company Ltd)  
32 63370 Duloxetine 30mg gastro-resistant capsules (Mawdsley-Brooks & Company Ltd)  
33 65618 Duloxetine 30mg gastro-resistant capsules (A A H Pharmaceuticals Ltd)  
34 65809 Duloxetine 30mg gastro-resistant capsules (Actavis UK Ltd)  
35 66412 Duloxetine 30mg gastro-resistant capsules (DE Pharmaceuticals)  
36 63763 Duloxetine 60mg gastro-resistant capsules (A A H Pharmaceuticals Ltd)  
37 64442 Duloxetine 60mg gastro-resistant capsules (Teva UK Ltd)  
38 65888 Duloxetine 60mg gastro-resistant capsules (Actavis UK Ltd)  
39 65892 Duloxetine 60mg gastro-resistant capsules (Mawdsley-Brooks & Company Ltd)  
40 66405 Duloxetine 60mg gastro-resistant capsules (DE Pharmaceuticals)  
41 603 Escitalopram 10mg tablets  
42 648 CipraleX 10mg tablets (Lundbeck Ltd)  
43 785 CipraleX 5mg tablets (Lundbeck Ltd)  
44 6218 Escitalopram 20mg tablets  
45 6360 CipraleX 20mg tablets (Lundbeck Ltd)  
46 6405 Escitalopram 5mg tablets  
47 20152 Escitalopram 10mg/ml oral drops sugar free  
48 26056 CipraleX 10mg/ml oral drops (Lundbeck Ltd)  
49 40726 Escitalopram 20mg/ml oral drops sugar free  
50 41062 CipraleX 20mg/ml oral drops (Lundbeck Ltd)  
51 63916 Escitalopram 10mg tablets (Actavis UK Ltd)

1  
2 22 Fluoxetine 20mg capsules  
3 252 Prozac 20mg/5ml liquid (Eli Lilly and Company Ltd)  
4 418 Prozac 20mg capsules (Eli Lilly and Company Ltd)  
5 2548 Fluoxetine 20mg/5ml oral solution  
6  
7 4075 Fluoxetine 60mg capsules  
8 4907 Prozac 60mg capsules (Eli Lilly and Company Ltd)  
9 14740 Oxactin 20mg capsules (Discovery Pharmaceuticals)  
10 19183 Fluoxetine 20mg capsules (A A H Pharmaceuticals Ltd)  
11 19470 Fluoxetine 20mg capsules (Ranbaxy (UK) Ltd)  
12 29786 Ranflutin 20mg capsules (Ranbaxy (UK) Ltd)  
13 30258 Fluoxetine 20mg/5ml oral solution (Teva UK Ltd)  
14 33071 Felicium 20mg capsules (Opus Pharmaceuticals Ltd)  
15 33410 Fluoxetine 20mg capsules (Zentiva)  
16 33779 Proxit 20mg/5ml oral solution (Pinewood Healthcare)  
17 34202 Fluoxetine 20mg capsules (Genus Pharmaceuticals Ltd)  
18 34216 Fluoxetine 20mg/5ml oral solution (A A H Pharmaceuticals Ltd)  
19 34288 Fluoxetine 20mg capsules (Mylan Ltd)  
20 34294 Fluoxetine 20mg capsules (IVAX Pharmaceuticals UK Ltd)  
21 34456 Fluoxetine 20mg capsules (Teva UK Ltd)  
22 34849 Fluoxetine 20mg capsules (Tillomed Laboratories Ltd)  
23 34856 Fluoxetine 60mg capsules (Mylan Ltd)  
24 36893 Fluoxetine 20mg/5ml oral solution sugar free  
25 37256 Prozep 20mg/5ml oral solution (Chemidex Pharma Ltd)  
26 38890 Fluoxetine 20mg Capsule (Milpharm Ltd)  
27 42107 Fluoxetine 20mg capsules (Niche Generics Ltd)  
28 42499 Fluoxetine 10mg tablets  
29 42803 Fluoxetine 20mg/5ml oral solution (IVAX Pharmaceuticals UK Ltd)  
30 45224 Fluoxetine 20mg capsules (Sandoz Ltd)  
31 45247 Fluoxetine 20mg capsules (Fannin UK Ltd)  
32 45316 Fluoxetine 20mg capsules (Wockhardt UK Ltd)  
33 45329 Fluoxetine 20mg capsules (Actavis UK Ltd)  
34 48220 Prozac 20mg capsules (Lexon (UK) Ltd)  
35 57532 Prozac 20mg capsules (Waymade Healthcare Plc)  
36 59358 Fluoxetine 20mg capsules (Milpharm Ltd)  
37 60534 Fluoxetine 20mg dispersible tablets sugar free  
38 60619 Fluoxetine 20mg/5ml oral solution (Kent Pharmaceuticals Ltd)  
39 60962 Fluoxetine 20mg capsules (Alliance Healthcare (Distribution) Ltd)  
40 61335 Prozac 20mg capsules (Mawdsley-Brooks & Company Ltd)  
41 62155 Fluoxetine 20mg capsules (Phoenix Healthcare Distribution Ltd)  
42 62335 Olena 20mg dispersible tablets (AMCo)  
43 600 Flupentixol 1mg tablets  
44 2275 Flupentixol 500microgram tablets  
45 3951 Fluaxol 1mg tablets (Lundbeck Ltd)  
46 3953 Fluaxol 500microgram tablets (Lundbeck Ltd)  
47 50592 Fluaxol 1mg tablets (Sigma Pharmaceuticals Plc)  
48 59593 Fluaxol 500microgram tablets (Lexon (UK) Ltd)  
49 2290 Fluvoxamine 100mg tablets  
50 2880 Fluvoxamine 50mg tablets  
51 2897 Faverin 50mg tablets (BGP Products Ltd)  
52 12123 Faverin 100mg tablets (BGP Products Ltd)



1  
2 43518 Fluvoxamine 100mg tablets (IVAX Pharmaceuticals UK Ltd)  
3 44861 Fluvoxamine 100mg tablets (Actavis UK Ltd)  
4 48045 Fluvoxamine 100mg tablets (A A H Pharmaceuticals Ltd)  
5 7910 Tofranil 25mg tablets (Novartis Pharmaceuticals UK Ltd)  
6 2579 Tofranil 10mg Tablet (Novartis Pharmaceuticals UK Ltd)  
7  
8 33074 Praminiil 10mg Tablet (DDSA Pharmaceuticals Ltd)  
9 34872 Imipramine 25mg Tablet (C P Pharmaceuticals Ltd)  
10 1310 Imipramine 10mg tablets  
11 1809 Imipramine 25mg tablets  
12  
13 32863 Imipramine 10mg tablets (Teva UK Ltd)  
14 34222 Imipramine 10mg tablets (Actavis UK Ltd)  
15 34355 Imipramine 25mg tablets (Actavis UK Ltd)  
16 34813 Imipramine 25mg tablets (A A H Pharmaceuticals Ltd)  
17 41408 Imipramine 25mg tablets (Teva UK Ltd)  
18 41681 Imipramine 10mg tablets (A A H Pharmaceuticals Ltd)  
19 42247 Imipramine 25mg/5ml oral solution sugar free  
20 56501 Tofranil 25mg tablets (Lexon (UK) Ltd)  
21 24700 Prondol 15mg Tablet (Wyeth Pharmaceuticals)  
22 27476 Iprindole hc 15mg  
23 27733 Iprindole hc 30mg  
24  
25 31672 Prondol 30mg Tablet (Wyeth Pharmaceuticals)  
26 114 Lofepamine 70mg tablets  
27 2093 Gamanil 70mg tablets (Merck Serono Ltd)  
28 4218 Lofepamine 70mg/5ml oral suspension sugar free  
29 25444 Lomont 70mg/5ml oral suspension (Rosemont Pharmaceuticals Ltd)  
30 34046 Lofepamine 70mg tablets (A A H Pharmaceuticals Ltd)  
31 34578 Lofepamine 70mg tablets (IVAX Pharmaceuticals UK Ltd)  
32 34672 Lofepamine 70mg tablets (Sterwin Medicines)  
33 34950 Lofepamine 70mg tablets (Actavis UK Ltd)  
34 41627 Lofepamine 70mg Tablet (Teva UK Ltd)  
35 43534 Lofepamine 70mg/5ml Oral suspension (Rosemont Pharmaceuticals Ltd)  
36 56229 Lofepamine 70mg/5ml oral solution  
37 56703 Lofepamine 70mg tablets (Sandoz Ltd)  
38 58450 Fepapax 70mg tablets (Ashbourne Pharmaceuticals Ltd)  
39 60591 Lofepamine 70mg tablets (Teva UK Ltd)  
40 66100 Lofepamine 70mg tablets (DE Pharmaceuticals)  
41 3083 Mianserin 10mg tablets  
42 6255 Mianserin 30mg tablets  
43 7468 Bolvidon 10mg Tablet (Organon Laboratories Ltd)  
44 8144 Bolvidon 20mg Tablet (Organon Laboratories Ltd)  
45 8585 Bolvidon 30mg Tablet (Organon Laboratories Ltd)  
46 11956 Norval 20mg Tablet (Bencard)  
47 12192 Norval 30mg Tablet (Bencard)  
48 12368 Norval 10mg Tablet (Bencard)  
49 47363 Mianserin 20mg Tablet (Berk Pharmaceuticals Ltd)  
50 742 Mirtazapine 30mg tablets  
51 4726 Zispin 30mg tablets (Organon Laboratories Ltd)  
52 6421 Mirtazapine 15mg orodispersible tablets  
53 6481 Mirtazapine 45mg orodispersible tablets  
54 6488 Mirtazapine 30mg orodispersible tablets  
55  
56  
57  
58  
59  
60

1 6795 Mirtazapine 15mg tablets  
2 6846 Zispin SolTab 15mg orodispersible tablets (Merck Sharp & Dohme Ltd)  
3 6854 Mirtazapine 45mg tablets  
4 10083 Zispin SolTab 30mg orodispersible tablets (Merck Sharp & Dohme Ltd)  
5 15268 Zispin SolTab 45mg orodispersible tablets (Merck Sharp & Dohme Ltd)  
6 16154 Mirtazapine 15mg/ml oral solution sugar free  
7 33337 Mirtazapine 45mg tablets (A A H Pharmaceuticals Ltd)  
8 40160 Mirtazapine 30mg tablets (Actavis UK Ltd)  
9 43234 Mirtazapine 45mg orodispersible tablets (Teva UK Ltd)  
10 43235 Mirtazapine 45mg orodispersible tablets (A A H Pharmaceuticals Ltd)  
11 43236 Mirtazapine 45mg orodispersible tablets (Actavis UK Ltd)  
12 43237 Mirtazapine 15mg orodispersible tablets (Teva UK Ltd)  
13 43239 Mirtazapine 15mg tablets (A A H Pharmaceuticals Ltd)  
14 43241 Mirtazapine 15mg orodispersible tablets (Aurobindo Pharma Ltd)  
15 43242 Mirtazapine 15mg tablets (Genus Pharmaceuticals Ltd)  
16 43246 Mirtazapine 15mg orodispersible tablets (Genus Pharmaceuticals Ltd)  
17 43247 Mirtazapine 45mg orodispersible tablets (Genus Pharmaceuticals Ltd)  
18 43248 Mirtazapine 15mg orodispersible tablets (Focus Pharmaceuticals Ltd)  
19 43250 Mirtazapine 30mg orodispersible tablets (A A H Pharmaceuticals Ltd)  
20 43253 Mirtazapine 15mg orodispersible tablets (A A H Pharmaceuticals Ltd)  
21 43256 Mirtazapine 45mg orodispersible tablets (Focus Pharmaceuticals Ltd)  
22 43257 Mirtazapine 15mg tablets (Teva UK Ltd)  
23 46668 Mirtazapine 15mg tablets (Arrow Generics Ltd)  
24 47945 Mirtazapine 30mg tablets (A A H Pharmaceuticals Ltd)  
25 47966 Mirtazapine 15mg/ml oral solution sugar free (Rosemont Pharmaceuticals Ltd)  
26 50892 Zispin SolTab 15mg orodispersible tablets (Necessity Supplies Ltd)  
27 53321 Mirtazapine 15mg/ml oral solution sugar free (A A H Pharmaceuticals Ltd)  
28 53543 Zispin SolTab 30mg orodispersible tablets (Necessity Supplies Ltd)  
29 53648 Mirtazapine 30mg orodispersible tablets (Actavis UK Ltd)  
30 53699 Mirtazapine 15mg tablets (Actavis UK Ltd)  
31 54342 Mirtazapine 15mg tablets (Medreich Plc)  
32 54644 Mirtazapine 15mg tablets (Pfizer Ltd)  
33 54792 Mirtazapine 30mg tablets (Alliance Healthcare (Distribution) Ltd)  
34 55482 Mirtazapine 15mg orodispersible tablets (Mylan Ltd)  
35 56209 Mirtazapine 30mg tablets (Phoenix Healthcare Distribution Ltd)  
36 58291 Mirtazapine 15mg orodispersible tablets (Pfizer Ltd)  
37 58625 Mirtazapine 45mg tablets (Actavis UK Ltd)  
38 59694 Mirtazapine 30mg orodispersible tablets (Phoenix Healthcare Distribution Ltd)  
39 59953 Mirtazapine 15mg tablets (Almus Pharmaceuticals Ltd)  
40 59954 Mirtazapine 45mg tablets (Almus Pharmaceuticals Ltd)  
41 60370 Zispin SolTab 15mg orodispersible tablets (Mawdsley-Brooks & Company Ltd)  
42 60538 Mirtazapine 30mg tablets (DE Pharmaceuticals)  
43 61547 Mirtazapine 15mg/ml oral solution sugar free (DE Pharmaceuticals)  
44 61856 Mirtazapine 15mg orodispersible tablets (Consilient Health Ltd)  
45 63403 Mirtazapine 30mg tablets (Teva UK Ltd)  
46 64101 Mirtazapine 15mg orodispersible tablets (Actavis UK Ltd)  
47 64139 Mirtazapine 45mg orodispersible tablets (Mylan Ltd)  
48 64223 Mirtazapine 45mg tablets (Teva UK Ltd)  
49 65555 Mirtazapine 15mg orodispersible tablets (Sigma Pharmaceuticals Plc)  
50 66183 Mirtazapine 15mg tablets (Alliance Healthcare (Distribution) Ltd)

1  
2 66580 Mirtazapine 15mg orodispersible tablets (Bluefish Pharmaceuticals AB)  
3 9534 Nefazodone Starter pack  
4 3391 Dutonin 100mg tablets (Bristol-Myers Squibb Pharmaceuticals Ltd)  
5 4011 Nefazodone 200mg tablets  
6 4297 Dutonin 200mg tablets (Bristol-Myers Squibb Pharmaceuticals Ltd)  
7 4554 Nefazodone 100mg tablets  
8 3183 Nortriptyline 10mg tablets  
9 7677 Allegron 10mg tablets (King Pharmaceuticals Ltd)  
10 8640 Allegron 25mg tablets (King Pharmaceuticals Ltd)  
11 4118 Nortriptyline 10mg Capsule  
12 7678 Nortriptyline 25mg Capsule  
13 12353 Aventyl 25mg Capsule (Eli Lilly and Company Ltd)  
14 12549 Aventyl 10mg/5ml Liquid (Eli Lilly and Company Ltd)  
15 17183 Aventyl 10mg Capsule (Eli Lilly and Company Ltd)  
16 39145 Nortriptyline 10mg/5ml Liquid  
17 3903 Nortriptyline 25mg tablets  
18 48216 Nortriptyline 25mg tablets (A A H Pharmaceuticals Ltd)  
19 55970 Nortriptyline 10mg tablets (King Pharmaceuticals Ltd)  
20 63276 Nortriptyline 25mg tablets (Alliance Healthcare (Distribution) Ltd)  
21 65237 Nortriptyline 10mg tablets (A A H Pharmaceuticals Ltd)  
22 66201 Nortriptyline 25mg tablets (Sigma Pharmaceuticals Plc)  
23 20571 Fluphenazine with nortriptyline 500microgramswith10mg Tablet  
24 50 Paroxetine 20mg tablets  
25 527 Paroxetine 10mg/5ml oral suspension sugar free  
26 841 Seroxat 20mg tablets (GlaxoSmithKline UK Ltd)  
27 1397 Paroxetine 30mg tablets  
28 1575 Seroxat 30mg tablets (GlaxoSmithKline UK Ltd)  
29 3601 Seroxat 20mg/10ml liquid (GlaxoSmithKline UK Ltd)  
30 32899 Paroxetine 20mg tablets (Actavis UK Ltd)  
31 33978 Paroxetine 20mg tablets (Mylan Ltd)  
32 34351 Paroxetine 20mg tablets (IVAX Pharmaceuticals UK Ltd)  
33 34419 Paroxetine 20mg tablets (A A H Pharmaceuticals Ltd)  
34 34587 Paroxetine 30mg tablets (A A H Pharmaceuticals Ltd)  
35 35021 Paroxetine 10mg tablets  
36 35112 Seroxat 10mg tablets (GlaxoSmithKline UK Ltd)  
37 40165 Paroxetine 30mg tablets (Actavis UK Ltd)  
38 40892 Paroxetine 20mg tablets (Genus Pharmaceuticals Ltd)  
39 55023 Paroxetine 20mg tablets (Medreich Plc)  
40 55537 Seroxat 30mg tablets (Lexon (UK) Ltd)  
41 59288 Paroxetine 10mg tablets (Actavis UK Ltd)  
42 64785 Paroxetine 30mg tablets (Alliance Healthcare (Distribution) Ltd)  
43 66292 Seroxat 10mg tablets (Waymade Healthcare Plc)  
44 63069 Rewisca 75mg capsules (Consilient Health Ltd)  
45 63088 Rewisca 50mg capsules (Consilient Health Ltd)  
46 63089 Rewisca 300mg capsules (Consilient Health Ltd)  
47 63090 Rewisca 150mg capsules (Consilient Health Ltd)  
48 63091 Rewisca 100mg capsules (Consilient Health Ltd)  
49 63174 Rewisca 200mg capsules (Consilient Health Ltd)  
50 63300 Rewisca 25mg capsules (Consilient Health Ltd)  
51 63317 Rewisca 225mg capsules (Consilient Health Ltd)

1 63877 Pregabalin 50mg capsules (A A H Pharmaceuticals Ltd)  
2 63964 Alzain 25mg capsules (Dr Reddy's Laboratories (UK) Ltd)  
3 63965 Alzain 100mg capsules (Dr Reddy's Laboratories (UK) Ltd)  
4 64005 Pregabalin 100mg capsules (A A H Pharmaceuticals Ltd)  
5 64037 Alzain 300mg capsules (Dr Reddy's Laboratories (UK) Ltd)  
6 64038 Alzain 225mg capsules (Dr Reddy's Laboratories (UK) Ltd)  
7 64039 Alzain 150mg capsules (Dr Reddy's Laboratories (UK) Ltd)  
8 64040 Alzain 75mg capsules (Dr Reddy's Laboratories (UK) Ltd)  
9 64041 Alzain 50mg capsules (Dr Reddy's Laboratories (UK) Ltd)  
10 64042 Alzain 200mg capsules (Dr Reddy's Laboratories (UK) Ltd)  
11 65069 Pregabalin 75mg capsules (Teva UK Ltd)  
12 65073 Pregabalin 25mg capsules (Teva UK Ltd)  
13 65218 Lecaent 50mg capsules (Actavis UK Ltd)  
14 790 Pregabalin 25mg capsules  
15 819 Pregabalin 75mg capsules  
16 6631 Pregabalin 150mg capsules  
17 6936 Pregabalin 50mg capsules  
18 6949 Pregabalin 200mg capsules  
19 6999 Pregabalin 100mg capsules  
20 7005 Pregabalin 300mg capsules  
21 37801 Pregabalin 225mg capsules  
22 55972 Pregabalin 150mg/5ml oral solution  
23 60543 Pregabalin 75mg/5ml oral solution  
24 64285 Pregabalin 150mg/5ml oral suspension  
25 65606 Pregabalin 50mg capsules (Accord Healthcare Ltd)  
26 65787 Pregabalin 50mg capsules (Sandoz Ltd)  
27 66509 Pregabalin 75mg capsules (Zentiva)  
28 6584 Lyrica 75mg capsules (Pfizer Ltd)  
29 7208 Lyrica 100mg capsules (Pfizer Ltd)  
30 7209 Lyrica 50mg capsules (Pfizer Ltd)  
31 7394 Lyrica 200mg capsules (Pfizer Ltd)  
32 10189 Lyrica 300mg capsules (Pfizer Ltd)  
33 16509 Lyrica 150mg capsules (Pfizer Ltd)  
34 16542 Lyrica 25mg capsules (Pfizer Ltd)  
35 38293 Lyrica 225mg capsules (Pfizer Ltd)  
36 48253 Lyrica 150mg capsules (Lexon (UK) Ltd)  
37 52547 Lyrica 50mg capsules (Waymade Healthcare Plc)  
38 64497 Lyrica 75mg capsules (Waymade Healthcare Plc)  
39 64568 Lyrica 150mg capsules (Sigma Pharmaceuticals Plc)  
40 65863 Lyrica 75mg capsules (Stephar (U.K.) Ltd)  
41 60929 Protriptyline 5mg tablets  
42 7755 Concoridin 10 Tablet (Merck Sharp & Dohme Ltd)  
43 7756 Protriptyline 5mg tablet  
44 7816 Concoridin 5 Tablet (Merck Sharp & Dohme Ltd)  
45 11187 Protriptyline 10mg tablet  
46 2356 Reboxetine 4mg tablets  
47 15163 Edronax 4mg tablets (Pfizer Ltd)  
48 65771 Sertraline 200mg/5ml oral suspension (Special Order)  
49 488 Sertraline 50mg tablets  
50 727 Sertraline 100mg tablets  
51  
52  
53  
54  
55  
56  
57  
58  
59  
60

1  
2 1612 Lustral 50mg tablets (Pfizer Ltd)  
3 4352 Lustral 100mg tablets (Pfizer Ltd)  
4 7328 Sertraline 50mg/5ml oral suspension  
5 32401 Sertraline 50mg tablets (A A H Pharmaceuticals Ltd)  
6 42387 Sertraline 50mg tablets (Actavis UK Ltd)  
7 44944 Sertraline 100mg tablets (Teva UK Ltd)  
8 45915 Sertraline 50mg tablets (Almus Pharmaceuticals Ltd)  
9 49519 Sertraline 100mg/5ml oral suspension  
10 54826 Sertraline 150mg/5ml oral suspension  
11 54933 Sertraline 100mg tablets (PLIVA Pharma Ltd)  
12 55146 Sertraline 100mg tablets (A A H Pharmaceuticals Ltd)  
13 55488 Sertraline 50mg tablets (Teva UK Ltd)  
14 58664 Sertraline 50mg tablets (Mylan Ltd)  
15 58723 Sertraline 50mg tablets (Accord Healthcare Ltd)  
16 59600 Sertraline 100mg tablets (Almus Pharmaceuticals Ltd)  
17 61503 Sertraline 100mg tablets (Actavis UK Ltd)  
18 62692 Sertraline 100mg tablets (Bristol Laboratories Ltd)  
19 62693 Sertraline 50mg tablets (Bristol Laboratories Ltd)  
20 62819 Sertraline 12.5mg/5ml oral suspension  
21 62927 Sertraline 50mg tablets (Wockhardt UK Ltd)  
22 62950 Sertraline 100mg tablets (Accord Healthcare Ltd)  
23 63481 Sertraline 50mg tablets (Aurobindo Pharma Ltd)  
24 66413 Sertraline 100mg tablets (Ranbaxy (UK) Ltd)  
25 66560 Sertraline 100mg tablets (Mylan Ltd)  
26 1730 Trazodone 100mg capsules  
27 3355 Trazodone 50mg capsules  
28 4003 Molipaxin 150mg tablets (Zentiva)  
29 4020 Trazodone 150mg tablets  
30 4194 Molipaxin 100mg capsules (Zentiva)  
31 4874 Molipaxin 50mg capsules (Zentiva)  
32 6442 Trazodone 50mg/5ml oral solution sugar free  
33 8174 Molipaxin 50mg/5ml oral liquid (Sanofi)  
34 19181 Trazodone 100mg capsules (Mylan Ltd)  
35 29339 Trazodone 50mg capsules (Mylan Ltd)  
36 29857 Trazodone 150mg tablets (Teva UK Ltd)  
37 30983 Trazodone 150mg tablets (Mylan Ltd)  
38 34003 Trazodone 50mg capsules (A A H Pharmaceuticals Ltd)  
39 34421 Trazodone 50mg capsules (Zentiva)  
40 34470 Trazodone 150mg tablets (Zentiva)  
41 34580 Trazodone 100mg capsules (A A H Pharmaceuticals Ltd)  
42 41609 Trazodone 50mg capsules (Teva UK Ltd)  
43 41709 Trazodone 100mg capsules (Teva UK Ltd)  
44 41710 Trazodone 100mg capsules (Zentiva)  
45 55137 Trazodone 150mg/5ml oral suspension  
46 57226 Trazodone 25mg/5ml oral suspension  
47 59931 Trazodone 50mg/5ml oral solution sugar free (A A H Pharmaceuticals Ltd)  
48 61657 Trazodone 75mg/5ml oral solution  
49 65152 Trazodone 100mg/5ml oral solution  
50 2039 Trimipramine 25mg tablets  
51 2531 Surmontil 50mg capsules (Sanofi)



1 2532 Surmontil 25mg tablets (Sanofi)  
2 3196 Trimipramine 50mg capsules  
3 4310 Trimipramine 10mg tablets  
4 8928 Surmontil 10mg tablets (Sanofi)  
5 42228 Trimipramine 10mg tablets (A A H Pharmaceuticals Ltd)  
6 45226 Trimipramine 25mg tablets (A A H Pharmaceuticals Ltd)  
7 53808 Trimipramine 10mg tablets (Phoenix Healthcare Distribution Ltd)  
8 57978 Trimipramine 25mg tablets (Waymade Healthcare Plc)  
9 65445 Trimipramine 50mg capsules (A A H Pharmaceuticals Ltd)  
10 66493 Trimipramine 25mg/5ml oral suspension  
11 4422 Tryptophan 500mg tablets  
12 5611 Optimax 500mg tablets (Intrapharm Laboratories Ltd)  
13 12221 Pacitron 500mg Tablet (Rorer Pharmaceuticals Ltd)  
14 20504 Optimax wv Tablet (E. Merck)  
15 301 Venlafaxine 37.5mg tablets  
16 470 Venlafaxine 75mg modified-release capsules  
17 623 Efexor 37.5mg tablets (Wyeth Pharmaceuticals)  
18 1222 Venlafaxine 75mg tablets  
19 1474 Efexor XL 75mg capsules (Pfizer Ltd)  
20 2654 Venlafaxine 150mg modified-release capsules  
21 5710 Efexor XL 150mg capsules (Pfizer Ltd)  
22 9182 Efexor 75mg tablets (Wyeth Pharmaceuticals)  
23 13237 Venlafaxine 37.5mg/5ml oral suspension  
24 39359 Venlafaxine 75mg modified-release tablets  
25 39360 Venlafaxine 150mg modified-release tablets  
26 39770 Tifaxin XL 75mg capsules (Genus Pharmaceuticals Ltd)  
27 39809 Tifaxin XL 150mg capsules (Genus Pharmaceuticals Ltd)  
28 40048 ViePax XL 75mg tablets (Dexcel-Pharma Ltd)  
29 40049 ViePax XL 150mg tablets (Dexcel-Pharma Ltd)  
30 40054 Venlafaxine 225mg modified-release tablets  
31 40059 Venlalic XL 75mg tablets (DB Ashbourne Ltd)  
32 40062 Venlalic XL 150mg tablets (DB Ashbourne Ltd)  
33 40092 Vensir XL 150mg capsules (Morningside Healthcare Ltd)  
34 40277 Vensir XL 75mg capsules (Morningside Healthcare Ltd)  
35 40407 Venlalic XL 225mg tablets (DB Ashbourne Ltd)  
36 40514 Venaxx XL 150mg capsules (AMCo)  
37 40515 Venaxx XL 75mg capsules (AMCo)  
38 40517 Vexarin XL 150mg capsules (Mylan Ltd)  
39 40764 ViePax 37.5mg tablets (Dexcel-Pharma Ltd)  
40 40815 Tardcaps XL 75mg capsules (IXL Pharma Ltd)  
41 40817 Tardcaps XL 150mg capsules (IXL Pharma Ltd)  
42 40917 ViePax 75mg tablets (Dexcel-Pharma Ltd)  
43 41033 Rodomel XL 75mg capsules (Teva UK Ltd)  
44 41299 Politid XL 75mg capsules (Actavis UK Ltd)  
45 41314 Rodomel XL 150mg capsules (Teva UK Ltd)  
46 42600 Vexarin XL 75mg capsules (Mylan Ltd)  
47 43203 Venlafaxine 75mg modified-release capsules (Sandoz Ltd)  
48 43334 Venlafaxine 150mg modified-release capsules (Sandoz Ltd)  
49 43673 Politid XL 150mg capsules (Actavis UK Ltd)  
50 43968 Foraven XL 75mg capsules (Forum Products Ltd)

1  
2 44936 Venlaneo XL 150mg capsules (Kent Pharmaceuticals Ltd)  
3 44937 Venlaneo XL 75mg capsules (Kent Pharmaceuticals Ltd)  
4 45664 Depefex XL 150mg capsules (Chiesi Ltd)  
5 45806 Venlafaxine 37.5mg modified-release tablets  
6 45818 Venlalic XL 37.5mg tablets (DB Ashbourne Ltd)  
7 45959 Depefex XL 75mg capsules (Chiesi Ltd)  
8 48199 Ranfaxine XL 75mg capsules (Ranbaxy (UK) Ltd)  
9 49511 Venlablue XL 75mg capsules (Bluefish Pharmaceuticals AB)  
10 50081 Venlablue XL 150mg capsules (Bluefish Pharmaceuticals AB)  
11 50934 Venlafaxine 150mg/5ml oral solution  
12 51280 Efexor XL 150mg capsules (Waymade Healthcare Plc)  
13 51361 Venlafaxine 37.5mg tablets (Ranbaxy (UK) Ltd)  
14 52074 Alventa XL 75mg capsules (Consilient Health Ltd)  
15 52516 Alventa XL 150mg capsules (Consilient Health Ltd)  
16 52716 Tonpular XL 75mg capsules (Wockhardt UK Ltd)  
17 53326 Venlafaxine 75mg/5ml oral solution  
18 55424 Venlafaxine  
19 55501 Venlafaxine 150mg Modified-release capsule (Hillcross Pharmaceuticals Ltd)  
20 56457 Venlafaxine 75mg tablets (Teva UK Ltd)  
21 56662 Venlafaxine 37.5mg tablets (A A H Pharmaceuticals Ltd)  
22 57751 Tonpular XL 150mg capsules (Wockhardt UK Ltd)  
23 58726 Venladex XL 150mg tablets (Dexcel-Pharma Ltd)  
24 59035 Venlablue XL 37.5mg capsules (Bluefish Pharmaceuticals AB)  
25 59563 Venlafaxine 75mg modified-release capsules (Kent Pharmaceuticals Ltd)  
26 59753 Sunveniz XL 150mg tablets (Sun Pharmaceuticals UK Ltd)  
27 59923 Venlafaxine 37.5mg tablets (Bristol Laboratories Ltd)  
28 60449 Venlafaxine 75mg tablets (A A H Pharmaceuticals Ltd)  
29 60549 Venlafaxine 150mg modified-release capsules (Kent Pharmaceuticals Ltd)  
30 60843 Sunveniz XL 75mg tablets (Sun Pharmaceuticals UK Ltd)  
31 60895 Venlafaxine 37.5mg tablets (Teva UK Ltd)  
32 61236 Bonilux XL 150mg capsules (Sandoz Ltd)  
33 62734 Venlafaxine 150mg/5ml oral suspension  
34 63859 Venlafaxine 75mg tablets (Waymade Healthcare Plc)  
35 65738 Efexor 37.5mg tablets (Sigma Pharmaceuticals Plc)  
36 66437 Venlafaxine 75mg tablets (DE Pharmaceuticals)  
37 12111 Vivalan 50mg Tablet (AstraZeneca UK Ltd)  
38 12309 Viloxazine hcl 50mg tablets  
39 51227 Pregabalin 20mg/ml oral solution sugar free  
40 51924 Lyrica 20mg/ml oral solution (Pfizer Ltd)  
41 48698 Mirtazapine 15mg orodispersible tablets sugar free  
42 49820 Mirtazapine 45mg orodispersible tablets sugar free  
43 51699 Venlafaxine 37.5mg/5ml oral solution  
44 54012 Mirtazapine 15mg orodispersible tablets sugar free (Sandoz Ltd)  
45 54686 Tryptophan 500mg capsules  
46 54747 Optimax 500mg capsules (Intrapharm Laboratories Ltd)  
47 58681 Venladex XL 75mg tablets (Dexcel-Pharma Ltd)  
48 58837 Venlafaxine 37.5mg modified-release capsules  
49 63268 Venlafaxine 75mg/5ml oral suspension  
50 65482 Vortioxetine 5mg tablets  
51 65483 Vortioxetine 10mg tablets



1  
2 65666 Venlafaxine 225mg modified-release capsules  
3 65899 Efexor XL 225mg capsules (Pfizer Ltd)  
4 54081 Sertraline 25mg/5ml oral suspension  
5 60138 Fluoxetine 20mg orodispersible tablets sugar free  
6 55138 Trazodone 250mg/5ml oral solution  
7 61842 Trazodone 50mg/5ml oral solution  
8 65213 Trimipramine 50mg/5ml oral solution  
9 64000 Amitriptyline 10mg/5ml oral solution sugar free  
10  
11  
12  
13  
14  
15  
16  
17  
18  
19  
20  
21  
22  
23  
24  
25  
26  
27  
28  
29  
30  
31  
32  
33  
34  
35  
36  
37  
38  
39  
40  
41  
42  
43  
44  
45  
46  
47  
48  
49  
50  
51  
52  
53  
54  
55  
56  
57  
58  
59  
60

For peer review only

1  
2 **drugsubstance**  
3 Agomelatine  
4 Agomelatine  
5 Amitriptyline Hydrochloride  
6 Amitriptyline Hydrochloride  
7 Amitriptyline hydrochloride  
8 Amitriptyline hydrochloride  
9 Amitriptyline hydrochloride  
10 Amitriptyline hydrochloride  
11 Amitriptyline hydrochloride  
12 Amitriptyline Hydrochloride  
13 Amitriptyline Hydrochloride  
14 Amitriptyline hydrochloride  
15 Amitriptyline hydrochloride  
16 Amitriptyline hydrochloride  
17 Amitriptyline hydrochloride  
18 Amitriptyline Hydrochloride  
19 Amitriptyline Hydrochloride  
20 Amitriptyline Hydrochloride  
21 Amitriptyline hydrochloride  
22 Amitriptyline Hydrochloride  
23 Amitriptyline hydrochloride  
24 Amitriptyline hydrochloride  
25 Amitriptyline hydrochloride  
26 Amitriptyline hydrochloride  
27 Amitriptyline hydrochloride  
28 Amitriptyline hydrochloride  
29 Amitriptyline hydrochloride  
30 Amitriptyline hydrochloride  
31 Amitriptyline hydrochloride  
32 Amitriptyline hydrochloride  
33 Amitriptyline hydrochloride  
34 Amitriptyline hydrochloride  
35 Amitriptyline hydrochloride  
36 Amitriptyline Hydrochloride  
37 Amitriptyline hydrochloride  
38 Amitriptyline hydrochloride  
39 Amitriptyline hydrochloride  
40 Amitriptyline hydrochloride  
41 Amitriptyline hydrochloride  
42 Amitriptyline hydrochloride  
43 Amitriptyline hydrochloride  
44 Amitriptyline hydrochloride  
45 Amitriptyline hydrochloride  
46 Amitriptyline hydrochloride  
47 Amitriptyline hydrochloride  
48 Amitriptyline hydrochloride  
49 Amitriptyline hydrochloride  
50 Amitriptyline hydrochloride  
51 Amitriptyline hydrochloride  
52 Amitriptyline hydrochloride  
53 Amitriptyline hydrochloride  
54 Amitriptyline hydrochloride  
55 Amitriptyline hydrochloride  
56 Amitriptyline hydrochloride  
57 Amitriptyline hydrochloride  
58 Amitriptyline hydrochloride  
59 Amitriptyline hydrochloride  
60 Amitriptyline hydrochloride

1 Amitriptyline hydrochloride  
2 Amitriptyline hydrochloride  
3 Amitriptyline hydrochloride  
4 Amitriptyline hydrochloride  
5 Amitriptyline hydrochloride  
6 Amitriptyline hydrochloride  
7 Amitriptyline hydrochloride  
8 Amitriptyline hydrochloride  
9 Amitriptyline hydrochloride  
10 Amitriptyline hydrochloride  
11 Amitriptyline hydrochloride  
12 Amitriptyline hydrochloride  
13 Amitriptyline hydrochloride  
14 Amitriptyline hydrochloride  
15 Amitriptyline hydrochloride  
16 Amitriptyline hydrochloride  
17 Amitriptyline hydrochloride  
18 Amitriptyline hydrochloride  
19 Amitriptyline hydrochloride  
20 Amitriptyline hydrochloride  
21 Amitriptyline hydrochloride  
22 Amitriptyline hydrochloride  
23 Amitriptyline hydrochloride  
24 Amitriptyline hydrochloride  
25 Amitriptyline hydrochloride  
26 Amitriptyline hydrochloride  
27 Amitriptyline hydrochloride  
28 Amitriptyline hydrochloride  
29 Amitriptyline hydrochloride  
30 Amitriptyline hydrochloride  
31 Amitriptyline Hydrochloride/Chlordiazepoxide  
32 Amitriptyline Hydrochloride/Chlordiazepoxide  
33 Amitriptyline Hydrochloride/Chlordiazepoxide  
34 Amitriptyline Hydrochloride/Chlordiazepoxide  
35 Amitriptyline hydrochloride/Perphenazine  
36 Amitriptyline hydrochloride/Perphenazine  
37 Amitriptyline hydrochloride/Perphenazine  
38 Amoxapine  
39 Amoxapine  
40 Amoxapine  
41 Amoxapine  
42 Amoxapine  
43 Amoxapine  
44 Amoxapine  
45 Amoxapine  
46 Ascorbic Acid/Tryptophan/Pyridoxine Hydrochloride  
47 Butriptyline Hydrochloride  
48 Butriptyline Hydrochloride  
49 Butriptyline Hydrochloride  
50 Butriptyline Hydrochloride  
51 Citalopram hydrobromide  
52 Citalopram hydrobromide  
53 Citalopram hydrobromide  
54 Citalopram hydrobromide  
55 Citalopram hydrobromide  
56 Citalopram hydrobromide  
57 Citalopram hydrobromide  
58 Citalopram hydrobromide  
59 Citalopram hydrobromide  
60 Citalopram hydrobromide

- 1 Citalopram hydrobromide
- 2 Citalopram hydrobromide
- 3 Citalopram hydrobromide
- 4 Citalopram hydrobromide
- 5 Citalopram hydrobromide
- 6 Citalopram hydrobromide
- 7 Citalopram hydrobromide
- 8 Citalopram hydrobromide
- 9 Citalopram hydrobromide
- 10 Citalopram hydrobromide
- 11 Citalopram hydrobromide
- 12 Citalopram hydrobromide
- 13 Citalopram hydrobromide
- 14 Citalopram hydrobromide
- 15 Citalopram hydrobromide
- 16 Citalopram hydrobromide
- 17 Citalopram hydrobromide
- 18 Citalopram hydrobromide
- 19 Citalopram hydrobromide
- 20 Citalopram hydrobromide
- 21 Citalopram hydrobromide
- 22 Citalopram hydrobromide
- 23 Citalopram hydrobromide
- 24 Citalopram hydrobromide
- 25 Citalopram hydrobromide
- 26 Citalopram hydrobromide
- 27 Citalopram hydrobromide
- 28 Citalopram hydrobromide
- 29 Citalopram hydrobromide
- 30 Citalopram hydrobromide
- 31 Citalopram hydrobromide
- 32 Citalopram hydrobromide
- 33 Citalopram hydrobromide
- 34 Citalopram hydrobromide
- 35 Citalopram hydrobromide
- 36 Citalopram hydrobromide
- 37 Citalopram hydrobromide
- 38 Citalopram hydrobromide
- 39 Citalopram hydrobromide
- 40 Citalopram hydrobromide
- 41 Citalopram hydrobromide
- 42 Citalopram hydrobromide
- 43 Citalopram hydrobromide
- 44 Citalopram hydrobromide
- 45 Citalopram hydrobromide
- 46 Citalopram hydrobromide
- 47 Citalopram hydrobromide
- 48 Citalopram hydrobromide
- 49 Citalopram hydrobromide
- 50 Citalopram hydrobromide
- 51 Citalopram hydrobromide
- 52 Citalopram hydrobromide
- 53 Citalopram hydrobromide
- 54 Citalopram hydrobromide
- 55 Citalopram hydrobromide
- 56 Citalopram hydrobromide
- 57 Citalopram hydrobromide
- 58 Citalopram hydrochloride
- 59 Citalopram hydrochloride
- 60 Citalopram hydrochloride

For peer review only

1 Citalopram hydrochloride  
2 Clomipramine hydrochloride  
3 Clomipramine hydrochloride  
4 Clomipramine hydrochloride  
5 Clomipramine hydrochloride  
6 Clomipramine hydrochloride  
7 Clomipramine hydrochloride  
8 Clomipramine hydrochloride  
9 Clomipramine hydrochloride  
10 Clomipramine hydrochloride  
11 Clomipramine hydrochloride  
12 Clomipramine hydrochloride  
13 Clomipramine hydrochloride  
14 Clomipramine hydrochloride  
15 Clomipramine hydrochloride  
16 Clomipramine hydrochloride  
17 Clomipramine hydrochloride  
18 Clomipramine hydrochloride  
19 Clomipramine hydrochloride  
20 Clomipramine hydrochloride  
21 Clomipramine hydrochloride  
22 Clomipramine hydrochloride  
23 Clomipramine hydrochloride  
24 Clomipramine hydrochloride  
25 Clomipramine hydrochloride  
26 Clomipramine hydrochloride  
27 Clomipramine hydrochloride  
28 Clomipramine hydrochloride  
29 Clomipramine hydrochloride  
30 Clomipramine hydrochloride  
31 Clomipramine hydrochloride  
32 Clomipramine hydrochloride  
33 Desipramine  
34 Desipramine  
35 Dosulepin hydrochloride  
36 Dosulepin hydrochloride  
37 Dosulepin hydrochloride  
38 Dosulepin hydrochloride  
39 Dosulepin hydrochloride  
40 Dosulepin hydrochloride  
41 Dosulepin Hydrochloride  
42 Dosulepin Hydrochloride  
43 Dosulepin hydrochloride  
44 Dosulepin Hydrochloride  
45 Dosulepin hydrochloride  
46 Dosulepin hydrochloride  
47 Dosulepin hydrochloride  
48 Dosulepin hydrochloride  
49 Dosulepin hydrochloride  
50 Dosulepin hydrochloride  
51 Dosulepin hydrochloride  
52 Dosulepin hydrochloride  
53 Dosulepin hydrochloride  
54 Dosulepin hydrochloride  
55 Dosulepin hydrochloride  
56 Dosulepin hydrochloride  
57 Dosulepin hydrochloride  
58 Dosulepin hydrochloride  
59 Dosulepin hydrochloride  
60 Dosulepin hydrochloride

1 Dosulepin hydrochloride  
2 Dosulepin hydrochloride  
3 Dosulepin hydrochloride  
4 Dosulepin hydrochloride  
5 Dosulepin hydrochloride  
6 Dosulepin hydrochloride  
7 Dosulepin hydrochloride  
8 Dosulepin hydrochloride  
9 Dosulepin hydrochloride  
10 Dosulepin Hydrochloride  
11 Dosulepin hydrochloride  
12 Dosulepin hydrochloride  
13 Dosulepin hydrochloride  
14 Dosulepin hydrochloride  
15 Dosulepin hydrochloride  
16 Doxepin hydrochloride  
17 Doxepin hydrochloride  
18 Doxepin hydrochloride  
19 Doxepin hydrochloride  
20 Doxepin hydrochloride  
21 Doxepin hydrochloride  
22 Doxepin hydrochloride  
23 Doxepin hydrochloride  
24 Doxepin hydrochloride  
25 Doxepin hydrochloride  
26 Doxepin hydrochloride  
27 Doxepin hydrochloride  
28 Doxepin Hydrochloride  
29 Duloxetine hydrochloride  
30 Duloxetine hydrochloride  
31 Duloxetine hydrochloride  
32 Duloxetine hydrochloride  
33 Duloxetine hydrochloride  
34 Duloxetine hydrochloride  
35 Duloxetine hydrochloride  
36 Duloxetine hydrochloride  
37 Duloxetine hydrochloride  
38 Duloxetine hydrochloride  
39 Duloxetine hydrochloride  
40 Duloxetine hydrochloride  
41 Duloxetine hydrochloride  
42 Duloxetine hydrochloride  
43 Duloxetine hydrochloride  
44 Duloxetine hydrochloride  
45 Duloxetine hydrochloride  
46 Duloxetine hydrochloride  
47 Duloxetine hydrochloride  
48 Duloxetine hydrochloride  
49 Escitalopram oxalate  
50 Escitalopram oxalate  
51 Escitalopram oxalate  
52 Escitalopram oxalate  
53 Escitalopram oxalate  
54 Escitalopram oxalate  
55 Escitalopram oxalate  
56 Escitalopram oxalate  
57 Escitalopram oxalate  
58 Escitalopram Oxalate  
59 Escitalopram Oxalate  
60 Escitalopram oxalate

For peer review only

1 Fluoxetine hydrochloride  
2 Fluoxetine hydrochloride  
3 Fluoxetine hydrochloride  
4 Fluoxetine hydrochloride  
5 Fluoxetine hydrochloride  
6 Fluoxetine hydrochloride  
7 Fluoxetine hydrochloride  
8 Fluoxetine hydrochloride  
9 Fluoxetine hydrochloride  
10 Fluoxetine hydrochloride  
11 Fluoxetine hydrochloride  
12 Fluoxetine hydrochloride  
13 Fluoxetine hydrochloride  
14 Fluoxetine hydrochloride  
15 Fluoxetine hydrochloride  
16 Fluoxetine hydrochloride  
17 Fluoxetine hydrochloride  
18 Fluoxetine hydrochloride  
19 Fluoxetine hydrochloride  
20 Fluoxetine hydrochloride  
21 Fluoxetine hydrochloride  
22 Fluoxetine hydrochloride  
23 Fluoxetine hydrochloride  
24 Fluoxetine hydrochloride  
25 Fluoxetine hydrochloride  
26 Fluoxetine hydrochloride  
27 Fluoxetine hydrochloride  
28 Fluoxetine hydrochloride  
29 Fluoxetine hydrochloride  
30 Fluoxetine hydrochloride  
31 Fluoxetine hydrochloride  
32 Fluoxetine hydrochloride  
33 Fluoxetine hydrochloride  
34 Fluoxetine hydrochloride  
35 Fluoxetine hydrochloride  
36 Fluoxetine hydrochloride  
37 Fluoxetine hydrochloride  
38 Fluoxetine hydrochloride  
39 Fluoxetine hydrochloride  
40 Fluoxetine hydrochloride  
41 Fluoxetine hydrochloride  
42 Fluoxetine hydrochloride  
43 Fluoxetine hydrochloride  
44 Fluoxetine hydrochloride  
45 Fluoxetine hydrochloride  
46 Fluoxetine hydrochloride  
47 Fluoxetine hydrochloride  
48 Fluoxetine hydrochloride  
49 Fluoxetine hydrochloride  
50 Flupentixol dihydrochloride  
51 Flupentixol dihydrochloride  
52 Flupentixol dihydrochloride  
53 Flupentixol dihydrochloride  
54 Flupentixol dihydrochloride  
55 Flupentixol dihydrochloride  
56 Flupentixol dihydrochloride  
57 Fluvoxamine maleate  
58 Fluvoxamine maleate  
59 Fluvoxamine maleate  
60 Fluvoxamine maleate



1  
2 Fluvoxamine maleate  
3 Fluvoxamine maleate  
4 Fluvoxamine maleate  
5 Imipramine hydrochloride  
6 Imipramine hydrochloride  
7 Imipramine hydrochloride  
8 Imipramine hydrochloride  
9 Imipramine hydrochloride  
10 Imipramine hydrochloride  
11 Imipramine hydrochloride  
12 Imipramine hydrochloride  
13 Imipramine hydrochloride  
14 Imipramine hydrochloride  
15 Imipramine hydrochloride  
16 Imipramine hydrochloride  
17 Imipramine hydrochloride  
18 Imipramine hydrochloride  
19 Imipramine hydrochloride  
20 Imipramine hydrochloride  
21 Imipramine hydrochloride  
22 Iprindole  
23 Iprindole  
24 Iprindole  
25 Iprindole  
26 Iprindole  
27 Lofepramine hydrochloride  
28 Lofepramine hydrochloride  
29 Lofepramine hydrochloride  
30 Lofepramine hydrochloride  
31 Lofepramine hydrochloride  
32 Lofepramine hydrochloride  
33 Lofepramine hydrochloride  
34 Lofepramine hydrochloride  
35 Lofepramine hydrochloride  
36 Lofepramine hydrochloride  
37 Lofepramine hydrochloride  
38 Lofepramine hydrochloride  
39 Lofepramine hydrochloride  
40 Lofepramine hydrochloride  
41 Lofepramine hydrochloride  
42 Lofepramine hydrochloride  
43 Lofepramine hydrochloride  
44 Lofepramine hydrochloride  
45 Mianserin hydrochloride  
46 Mianserin hydrochloride  
47 Mianserin hydrochloride  
48 Mianserin hydrochloride  
49 Mianserin hydrochloride  
50 Mianserin hydrochloride  
51 Mianserin hydrochloride  
52 Mianserin hydrochloride  
53 Mianserin hydrochloride  
54 Mianserin hydrochloride  
55 Mianserin hydrochloride  
56 Mirtazapine  
57 Mirtazapine  
58 Mirtazapine  
59 Mirtazapine  
60 Mirtazapine

1 Mirtazapine  
2 Mirtazapine  
3 Mirtazapine  
4 Mirtazapine  
5 Mirtazapine  
6 Mirtazapine  
7 Mirtazapine  
8 Mirtazapine  
9 Mirtazapine  
10 Mirtazapine  
11 Mirtazapine  
12 Mirtazapine  
13 Mirtazapine  
14 Mirtazapine  
15 Mirtazapine  
16 Mirtazapine  
17 Mirtazapine  
18 Mirtazapine  
19 Mirtazapine  
20 Mirtazapine  
21 Mirtazapine  
22 Mirtazapine  
23 Mirtazapine  
24 Mirtazapine  
25 Mirtazapine  
26 Mirtazapine  
27 Mirtazapine  
28 Mirtazapine  
29 Mirtazapine  
30 Mirtazapine  
31 Mirtazapine  
32 Mirtazapine  
33 Mirtazapine  
34 Mirtazapine  
35 Mirtazapine  
36 Mirtazapine  
37 Mirtazapine  
38 Mirtazapine  
39 Mirtazapine  
40 Mirtazapine  
41 Mirtazapine  
42 Mirtazapine  
43 Mirtazapine  
44 Mirtazapine  
45 Mirtazapine  
46 Mirtazapine  
47 Mirtazapine  
48 Mirtazapine  
49 Mirtazapine  
50 Mirtazapine  
51 Mirtazapine  
52 Mirtazapine  
53 Mirtazapine  
54 Mirtazapine  
55 Mirtazapine  
56 Mirtazapine  
57 Mirtazapine  
58 Mirtazapine  
59 Mirtazapine  
60 Mirtazapine

For peer review only

1 Mirtazapine  
2 Nefazodone Hydrochloride  
3 Nefazodone hydrochloride  
4 Nefazodone hydrochloride  
5 Nefazodone hydrochloride  
6 Nefazodone hydrochloride  
7 Nefazodone hydrochloride  
8 Nortriptyline hydrochloride  
9 Nortriptyline hydrochloride  
10 Nortriptyline hydrochloride  
11 Nortriptyline Hydrochloride  
12 Nortriptyline Hydrochloride  
13 Nortriptyline Hydrochloride  
14 Nortriptyline Hydrochloride  
15 Nortriptyline Hydrochloride  
16 Nortriptyline Hydrochloride  
17 Nortriptyline Hydrochloride  
18 Nortriptyline Hydrochloride  
19 Nortriptyline hydrochloride  
20 Nortriptyline hydrochloride  
21 Nortriptyline hydrochloride  
22 Nortriptyline hydrochloride  
23 Nortriptyline hydrochloride  
24 Nortriptyline hydrochloride  
25 Nortriptyline hydrochloride  
26 Nortriptyline hydrochloride  
27 Nortriptyline Hydrochloride/Fluphenazine Hydrochloride  
28 Paroxetine hydrochloride  
29 Paroxetine hydrochloride  
30 Paroxetine hydrochloride  
31 Paroxetine hydrochloride  
32 Paroxetine hydrochloride  
33 Paroxetine hydrochloride  
34 Paroxetine hydrochloride  
35 Paroxetine hydrochloride  
36 Paroxetine hydrochloride  
37 Paroxetine hydrochloride  
38 Paroxetine hydrochloride  
39 Paroxetine hydrochloride  
40 Paroxetine hydrochloride  
41 Paroxetine hydrochloride  
42 Paroxetine hydrochloride  
43 Paroxetine hydrochloride  
44 Paroxetine hydrochloride  
45 Paroxetine hydrochloride  
46 Paroxetine hydrochloride  
47 Paroxetine hydrochloride  
48 Paroxetine hydrochloride  
49 Paroxetine hydrochloride  
50 Paroxetine hydrochloride  
51 Paroxetine hydrochloride  
52 Pregabalin  
53 Pregabalin  
54 Pregabalin  
55 Pregabalin  
56 Pregabalin  
57 Pregabalin  
58 Pregabalin  
59 Pregabalin  
60 Pregabalin

1  
2 Pregabalin  
3 Pregabalin  
4 Pregabalin  
5 Pregabalin  
6 Pregabalin  
7 Pregabalin  
8 Pregabalin  
9 Pregabalin  
10 Pregabalin  
11 Pregabalin  
12 Pregabalin  
13 Pregabalin  
14 Pregabalin  
15 Pregabalin  
16 Pregabalin  
17 Pregabalin  
18 Pregabalin  
19 Pregabalin  
20 Pregabalin  
21 Pregabalin  
22 Pregabalin  
23 Pregabalin  
24 Pregabalin  
25 Pregabalin  
26 Pregabalin  
27 Pregabalin  
28 Pregabalin  
29 Pregabalin  
30 Pregabalin  
31 Pregabalin  
32 Pregabalin  
33 Pregabalin  
34 Pregabalin  
35 Pregabalin  
36 Pregabalin  
37 Pregabalin  
38 Pregabalin  
39 Pregabalin  
40 Pregabalin  
41 Pregabalin  
42 Pregabalin  
43 Pregabalin  
44 Pregabalin  
45 Pregabalin  
46 Pregabalin  
47 Pregabalin  
48 Pregabalin  
49 Pregabalin  
50 Protriptyline hydrochloride  
51 Protriptyline Hydrochloride  
52 Protriptyline Hydrochloride  
53 Protriptyline Hydrochloride  
54 Protriptyline Hydrochloride  
55 Protriptyline Hydrochloride  
56 Reboxetine mesilate  
57 Reboxetine mesilate  
58 Sertraline  
59 Sertraline hydrochloride  
60 Sertraline hydrochloride

- 1 Sertraline hydrochloride
- 2 Sertraline hydrochloride
- 3 Sertraline hydrochloride
- 4 Sertraline hydrochloride
- 5 Sertraline hydrochloride
- 6 Sertraline hydrochloride
- 7 Sertraline hydrochloride
- 8 Sertraline hydrochloride
- 9 Sertraline hydrochloride
- 10 Sertraline hydrochloride
- 11 Sertraline hydrochloride
- 12 Sertraline hydrochloride
- 13 Sertraline hydrochloride
- 14 Sertraline hydrochloride
- 15 Sertraline hydrochloride
- 16 Sertraline hydrochloride
- 17 Sertraline hydrochloride
- 18 Sertraline hydrochloride
- 19 Sertraline hydrochloride
- 20 Sertraline hydrochloride
- 21 Sertraline hydrochloride
- 22 Sertraline hydrochloride
- 23 Sertraline hydrochloride
- 24 Sertraline hydrochloride
- 25 Sertraline hydrochloride
- 26 Sertraline hydrochloride
- 27 Sertraline hydrochloride
- 28 Sertraline hydrochloride
- 29 Sertraline hydrochloride
- 30 Sertraline hydrochloride
- 31 Trazodone hydrochloride
- 32 Trazodone hydrochloride
- 33 Trazodone hydrochloride
- 34 Trazodone hydrochloride
- 35 Trazodone hydrochloride
- 36 Trazodone hydrochloride
- 37 Trazodone hydrochloride
- 38 Trazodone hydrochloride
- 39 Trazodone hydrochloride
- 40 Trazodone hydrochloride
- 41 Trazodone hydrochloride
- 42 Trazodone hydrochloride
- 43 Trazodone hydrochloride
- 44 Trazodone hydrochloride
- 45 Trazodone hydrochloride
- 46 Trazodone hydrochloride
- 47 Trazodone hydrochloride
- 48 Trazodone hydrochloride
- 49 Trazodone hydrochloride
- 50 Trazodone hydrochloride
- 51 Trazodone hydrochloride
- 52 Trazodone hydrochloride
- 53 Trazodone hydrochloride
- 54 Trazodone hydrochloride
- 55 Trazodone hydrochloride
- 56 Trazodone hydrochloride
- 57 Trazodone hydrochloride
- 58 Trazodone hydrochloride
- 59 Trimipramine maleate
- 60 Trimipramine maleate

For peer review only

1 Trimipramine maleate  
2 Trimipramine maleate  
3 Trimipramine maleate  
4 Trimipramine maleate  
5 Trimipramine maleate  
6 Trimipramine maleate  
7 Trimipramine maleate  
8 Trimipramine maleate  
9 Trimipramine maleate  
10 Trimipramine maleate  
11 Trimipramine maleate  
12 Trimipramine maleate  
13 Trimipramine maleate  
14 Tryptophan  
15 Tryptophan  
16 Tryptophan  
17 Tryptophan  
18 Venlafaxine hydrochloride  
19 Venlafaxine hydrochloride  
20 Venlafaxine hydrochloride  
21 Venlafaxine hydrochloride  
22 Venlafaxine hydrochloride  
23 Venlafaxine hydrochloride  
24 Venlafaxine hydrochloride  
25 Venlafaxine hydrochloride  
26 Venlafaxine hydrochloride  
27 Venlafaxine hydrochloride  
28 Venlafaxine hydrochloride  
29 Venlafaxine Hydrochloride  
30 Venlafaxine Hydrochloride  
31 Venlafaxine Hydrochloride  
32 Venlafaxine hydrochloride  
33 Venlafaxine hydrochloride  
34 Venlafaxine hydrochloride  
35 Venlafaxine hydrochloride  
36 Venlafaxine Hydrochloride  
37 Venlafaxine Hydrochloride  
38 Venlafaxine Hydrochloride  
39 Venlafaxine Hydrochloride  
40 Venlafaxine hydrochloride  
41 Venlafaxine hydrochloride  
42 Venlafaxine Hydrochloride  
43 Venlafaxine hydrochloride  
44 Venlafaxine hydrochloride  
45 Venlafaxine hydrochloride  
46 Venlafaxine hydrochloride  
47 Venlafaxine hydrochloride  
48 Venlafaxine hydrochloride  
49 Venlafaxine hydrochloride  
50 Venlafaxine hydrochloride  
51 Venlafaxine hydrochloride  
52 Venlafaxine hydrochloride  
53 Venlafaxine hydrochloride  
54 Venlafaxine hydrochloride  
55 Venlafaxine hydrochloride  
56 Venlafaxine hydrochloride  
57 Venlafaxine hydrochloride  
58 Venlafaxine hydrochloride  
59 Venlafaxine hydrochloride  
60 Venlafaxine hydrochloride

1  
2 Venlafaxine hydrochloride  
3 Venlafaxine hydrochloride  
4 Venlafaxine hydrochloride  
5 Venlafaxine Hydrochloride  
6 Venlafaxine Hydrochloride  
7 Venlafaxine hydrochloride  
8 Venlafaxine hydrochloride  
9 Venlafaxine hydrochloride  
10 Venlafaxine hydrochloride  
11 Venlafaxine hydrochloride  
12 Venlafaxine hydrochloride  
13 Venlafaxine hydrochloride  
14 Venlafaxine hydrochloride  
15 Venlafaxine hydrochloride  
16 Venlafaxine hydrochloride  
17 Venlafaxine hydrochloride  
18 Venlafaxine hydrochloride  
19 Venlafaxine hydrochloride  
20 Venlafaxine hydrochloride  
21 Venlafaxine Hydrochloride  
22 Venlafaxine hydrochloride  
23 Venlafaxine hydrochloride  
24 Venlafaxine hydrochloride  
25 Venlafaxine hydrochloride  
26 Venlafaxine hydrochloride  
27 Venlafaxine hydrochloride  
28 Venlafaxine hydrochloride  
29 Venlafaxine hydrochloride  
30 Venlafaxine hydrochloride  
31 Venlafaxine hydrochloride  
32 Venlafaxine hydrochloride  
33 Venlafaxine hydrochloride  
34 Venlafaxine hydrochloride  
35 Venlafaxine hydrochloride  
36 Venlafaxine hydrochloride  
37 Venlafaxine hydrochloride  
38 Venlafaxine hydrochloride  
39 Venlafaxine hydrochloride  
40 Venlafaxine hydrochloride  
41 Venlafaxine hydrochloride  
42 Venlafaxine hydrochloride  
43 Venlafaxine hydrochloride  
44 Viloxazine Hydrochloride  
45 Viloxazine Hydrochloride  
46 Pregabalin  
47 Pregabalin  
48 Mirtazapine  
49 Mirtazapine  
50 Mirtazapine  
51 Venlafaxine  
52 Mirtazapine  
53 Tryptophan  
54 Tryptophan  
55 Tryptophan  
56 Venladex  
57 Venlafaxine  
58 Venlafaxine  
59 Vortioxetine  
60 Vortioxetine



1  
2 Venlafaxine  
3 Efexor  
4 Sertraline  
5 Fluoxetine  
6 Trazodone  
7 Trazodone  
8 Trazodone  
9 Trimipramine  
10 Amitriptyline  
11  
12  
13  
14  
15  
16  
17  
18  
19  
20  
21  
22  
23  
24  
25  
26  
27  
28  
29  
30  
31  
32  
33  
34  
35  
36  
37  
38  
39  
40  
41  
42  
43  
44  
45  
46  
47  
48  
49  
50  
51  
52  
53  
54  
55  
56  
57  
58  
59  
60

For peer review only

|    | <b>medcode</b> | <b>readcode</b> | <b>readterm</b>                                              |
|----|----------------|-----------------|--------------------------------------------------------------|
| 1  |                |                 |                                                              |
| 2  |                |                 |                                                              |
| 3  | 25631          | S02z.00         | Fracture of facial bone NOS                                  |
| 4  | 62966          | S300z00         | Closed fracture proximal femur, transcervical, NOS           |
| 5  | 69777          | SJ1yz00         | Other specified cranial nerve injury NOS                     |
| 6  |                |                 |                                                              |
| 7  | 49894          | S4H0500         | Closed #-dislocation, metatarsophalangeal joint, multiple    |
| 8  | 48660          | SD3y.00         | Superficial injury of lower arm NOS, without infection       |
| 9  | 39306          | SH11200         | Superficial burn of the eye                                  |
| 10 | 70039          | SD2zz00         | Superficial injury shoulder/upper arm, infection NOS         |
| 11 | 55965          | SH52A00         | Deep partial thickness burn of the ankle                     |
| 12 | 25461          | SH40600         | Unspecified thickness burn of the back of hand               |
| 13 | 6266           | SD20500         | Abrasion of arm,unspecified level without infection          |
| 14 | 62047          | S103100         | Open fracture thoracic vertebra, wedge                       |
| 15 | 67408          | S481500         | Open traumatic dislocation, metatarso-phalangeal jnt, single |
| 16 | 64974          | SH32800         | Deep partial thickness burn of the forearm                   |
| 17 | 53075          | SE30400         | Contusion, clavicular area                                   |
| 18 |                |                 |                                                              |
| 19 | 9740           | SE0..12         | Bruise of head                                               |
| 20 | 29165          | SH50z00         | Unspecified thickness burn of the leg NOS                    |
| 21 | 28192          | SD60100         | Abrasion, thigh                                              |
| 22 | 51009          | SH30400         | Unspecified thickness burn of the axilla                     |
| 23 | 35077          | S352E00         | Closed fracture metatarsal head                              |
| 24 | 24329          | S834100         | Open wound of cheek                                          |
| 25 | 25093          | SK1C200         | Injury of other flexor muscle and tendon at forearm level    |
| 26 | 16016          | S490.00         | Closed dislocation cervical spine                            |
| 27 | 1873           | S36..11         | Toe fracture                                                 |
| 28 | 30733          | SE23112         | Contusion of lower back                                      |
| 29 | 34745          | S440100         | Closed traumatic dislocation, metacarpophalangeal joint      |
| 30 | 32063          | S11..00         | Fracture of spine with spinal cord lesion                    |
| 31 | 15270          | S82v000         | Open wound of ear drum                                       |
| 32 | 48737          | N082K00         | Pathological dislocation of MCP joint                        |
| 33 | 33934          | SK1C.00         | Injury of muscle and tendon at forearm level                 |
| 34 | 72131          | SH71.00         | Burn of the larynx, trachea and lung                         |
| 35 | 69644          | SD6z100         | Superficial injury of thigh NOS, infected                    |
| 36 | 67602          | S481900         | Open traumatic dislocation, pantalar                         |
| 37 | 6808           | SH4..00         | Burn of the wrist(s) and hand(s)                             |
| 38 | 49209          | S300y00         | Closed fracture proximal femur, other transcervical          |
| 39 | 37889          | SF22.00         | Crush injury wrist or hand                                   |
| 40 | 34370          | S230800         | Closed fracture proximal radius, comminuted                  |
| 41 | 8589           | S315.00         | Fracture of lower end of femur                               |
| 42 | 66451          | SD3z100         | Superficial injury of forearm NOS, infected                  |
| 43 | 29128          | SH10800         | Unspecified thickness burn of the cheek                      |
| 44 | 63845          | SH12211         | Eye - 2nd degree burn                                        |
| 45 | 3513           | SH50200         | Unspecified thickness burn of the foot                       |
| 46 | 2513           | S791.00         | Internal injury with open wound into cavity NOS              |
| 47 | 24568          | S930.00         | Open wound of finger or thumb without mention of complicatn  |
| 48 | 24534          | S4A2100         | Closed fracture-subluxation acromio-clavicular joint         |
| 49 | 24486          | SJ70.11         | Head and neck superficial nerve injury                       |
| 50 | 47819          | SF21300         | Closed crush injury, elbow area                              |
| 51 | 103534         | SJ21800         | Anterior thoracic cord injury, without bony injury, T7-12    |
| 52 | 67849          | S4H0200         | Closed fracture-dislocation, tarsometatarsal joint           |
| 53 | 60766          | N083u00         | Recurrent dislocation of foot joint                          |
| 54 |                |                 |                                                              |
| 55 |                |                 |                                                              |
| 56 |                |                 |                                                              |
| 57 |                |                 |                                                              |
| 58 |                |                 |                                                              |
| 59 |                |                 |                                                              |
| 60 |                |                 |                                                              |

|    |                |                                                              |
|----|----------------|--------------------------------------------------------------|
| 1  |                |                                                              |
| 2  | 11008 SD1y800  | Superficial injury of groin NOS, without major open wound    |
| 3  | 40069 S331.00  | Open fracture of tibia and fibula, proximal                  |
| 4  | 24010 SH30100  | Unspecified thickness burn of the forearm                    |
| 5  | 68030 SH84z00  | Burn: 40-49% of body surface NOS                             |
| 6  | 47243 SD10B11  | Abrasion or friction burn of testis without infection        |
| 7  | 65055 S82v200  | Open wound of eustachian tube                                |
| 8  | 96998 S4D1600  | Open fracture-dislocation multiple digits                    |
| 9  | 36212 S430000  | Closed traumatic dislocation of wrist, unspecified           |
| 10 | 56544 SH82.00  | Burn involving 20-29% of body surface (BS)                   |
| 11 | 24118 SJB..00  | Injury of nerves at shoulder and upper arm level             |
| 12 | 36709 SH50300  | Unspecified thickness burn of the ankle                      |
| 13 | 34910 S4J0100  | Closed fracture-dislocation of pelvis                        |
| 14 | 39197 SF10100  | Crush injury, scrotum and testis                             |
| 15 | 100872 SH34.00 | Deep full thickness burn of arm without loss of body part    |
| 16 | 36833 SH10z00  | Unspecified thickness burn of the face, head or neck NOS     |
| 17 | 15518 S496z00  | Closed traumatic dislocation not otherwise specified         |
| 18 | 48142 S313200  | Open fracture of femur, lower epiphysis                      |
| 19 | 64452 SH53300  | Full thickness burn of the ankle                             |
| 20 | 69895 SF30200  | Closed crush injury, thigh                                   |
| 21 | 61340 S494200  | Closed dislocation of sacrum                                 |
| 22 | 33957 S300700  | Closed fracture proximal femur, subcapital, Garden grade II  |
| 23 | 55464 S332z00  | Closed fracture of tibia and fibula, shaft, NOS              |
| 24 | 28480 SF30000  | Crush injury, thigh                                          |
| 25 | 34870 S64..00  | Intracranial injury NOS                                      |
| 26 | 51841 SK1xA00  | Open wounds invol multi regions of up limb(s) wth lw limb(s) |
| 27 | 7988 S239.00   | Fracture of shaft of radius                                  |
| 28 | 23778 SJ9..00  | Injury of nerves and spinal cord at thorax level             |
| 29 | 1073 S23x211   | Fracture of ulna NOS                                         |
| 30 | 59690 7K6FQ00  | Primary open reduction # dislocation joint internal fix NEC  |
| 31 | 19288 SD11300  | Abrasion of abdominal wall, infected                         |
| 32 | 101316 S261700 | Open fracture thumb proximal phalanx, head                   |
| 33 | 73441 S003100  | Open #skull vlt + intracranial injury, no loss of consc      |
| 34 | 10609 SH10100  | Unspecified thickness burn of the ear                        |
| 35 | 29109 S33x.00  | Closed fracture of tibia and fibula, unspecified part, NOS   |
| 36 | 73792 SB48300  | Injury of unspecified blood vessel at ankle and foot level   |
| 37 | 61178 SH12x00  | Partial thickness burn of multiple sites face, head or neck  |
| 38 | 23503 S430100  | Closed traumatic dislocation distal radio-ulnar joint        |
| 39 | 67007 S353.00  | Open fracture of other tarsal and metatarsal bones           |
| 40 | 54306 S431500  | Open traumatic dislocation proximal metacarpal               |
| 41 | 10228 S4B..00  | Fracture-dislocation or subluxation elbow                    |
| 42 | 104355 S4B1100 | Open fracture-dislocation superior radio-ulnar joint         |
| 43 | 53915 SD61z00  | Abrasion or friction burn of lower limb, infected, NOS       |
| 44 | 41764 SE44.00  | Contusion, lower limb, multiple sites                        |
| 45 | 36783 7K6H700  | Secondary open reduction fracture disloc joint & fixation    |
| 46 | 16944 S292.00  | Multiple fractures of clavicle, scapula and humerus          |
| 47 | 95513 S100M00  | Closed fracture cervical vertebra, posterior arch            |
| 48 | 35901 S493.11  | Open dislocation of thoracic and lumbar vertebra             |
| 49 | 20893 S310012  | Upper leg fracture NOS                                       |
| 50 | 28015 SE4z.00  | Contusion, site NOS                                          |
| 51 | 40658 S353H00  | Open fracture cuneiforms                                     |

|    |                |                                                              |
|----|----------------|--------------------------------------------------------------|
| 1  |                |                                                              |
| 2  | 94458 SB31100  | Open injury, brachial artery                                 |
| 3  | 53686 S411000  | Open traumatic dislocation shoulder joint, unspecified       |
| 4  | 45664 S352A00  | Closed fracture talus, body                                  |
| 5  | 39887 S100A00  | Closed fracture axis, odontoid process                       |
| 6  | 33935 N083.12  | Habitual dislocation of joint                                |
| 7  |                |                                                              |
| 8  | 358 S3z..11    | Fracture NOS                                                 |
| 9  | 40692 SH40500  | Unspecified thickness burn of the palm of hand               |
| 10 | 44470 S73xy00  | Other gastrointestinal tract injury no open wound to cavity  |
| 11 | 60352 7J43z00  | Fixation of fracture of spine NOS                            |
| 12 | 22308 SE23200  | Contusion of lower back                                      |
| 13 |                |                                                              |
| 14 | 311 SKz..00    | Injury NOS                                                   |
| 15 | 101567 S303100 | Open fracture proximal femur, intertrochanteric, two part    |
| 16 | 68196 SJB1.00  | Injury of multiple nerves at shoulder and upper arm level    |
| 17 | 71373 SH84400  | Burn: 40-49% of body surface, 40-49% BS full thickness       |
| 18 | 60593 S100300  | Closed fracture of third cervical vertebra                   |
| 19 | 43799 SB33200  | Injury of ulnar artery at wrist and hand level               |
| 20 | 34723 S350100  | Closed fracture calcaneus, intra-articular                   |
| 21 | 50247 S04z.00  | Multiple fractures involving skull/face with other bones NOS |
| 22 | 21922 S312200  | Closed fracture of femur, lower epiphysis                    |
| 23 | 28068 S333.00  | Open fracture of tibia/fibula, shaft                         |
| 24 | 45970 PE30000  | Unilateral congenital dislocation of hip                     |
| 25 | 6869 S46z.00   | Dislocation of knee NOS                                      |
| 26 | 57327 SH70.00  | Burn of the mouth and pharynx                                |
| 27 | 265 SK17000    | Other knee injury                                            |
| 28 | 10990 S10B000  | Fracture of lumbar vertebra                                  |
| 29 | 9789 SF20011   | Crush injury of shoulder                                     |
| 30 | 69645 S101100  | Open fracture atlas                                          |
| 31 | 59226 SF11z00  | Crush injury, trunk NOS                                      |
| 32 | 42780 S105.00  | Open fracture lumbar vertebra                                |
| 33 | 27569 SF11200  | Crush injury, breast                                         |
| 34 | 21220 SH42600  | Superficial partial thickness burn of back of hand           |
| 35 | 61491 7J43400  | Primary open reduc spinal fracture+internal fix+rod system   |
| 36 | 32835 SD7yz00  | Superficial injury of foot and toe, without infection, NOS   |
| 37 | 68142 SJ34000  | Closed injury, brachial plexus, upper roots                  |
| 38 | 44732 SH52x00  | Partial thickness burn of multiple sites of the leg          |
| 39 | 55997 SH12G00  | Deep partial thickness burn of the scalp                     |
| 40 | 58893 S733100  | Duodenum injury with open wound into cavity                  |
| 41 | 49249 TG80z00  | Accidental burning/scalding caused by hot liquid/vapour NOS  |
| 42 | 24559 SF10111  | Crush injury of scrotum                                      |
| 43 | 21126 SD80000  | Abrasion or friction burn of eyelids and periocular area     |
| 44 | 41633 TG81y00  | Accidental burning caused by other caustic or corrosive      |
| 45 | 51980 T402600  | Fall from burning ship - docker or stevedore injured         |
| 46 | 53729 S84y100  | Open wound of supraclavicular region with complication       |
| 47 | 42216 7K6FD00  | Primary opn reduction of dislocation+oth stabilisation of jt |
| 48 | 35456 S6...00  | Intracranial injury excluding those with skull fracture      |
| 49 | 58838 SB22000  | Coeliac and mesenteric artery injury, unspecified            |
| 50 | 68347 SH14600  | Deep full thickness burn of scalp without loss of body part  |
| 51 | 22761 S330012  | Closed fracture of tibial tuberosity                         |
| 52 | 20778 SD71.12  | Abrasion or friction burn of toenail, infected               |
| 53 | 41306 TN86.00  | Injury ?accidental, by crashing of aircraft                  |
| 54 |                |                                                              |
| 55 |                |                                                              |
| 56 |                |                                                              |
| 57 |                |                                                              |
| 58 |                |                                                              |
| 59 |                |                                                              |
| 60 |                |                                                              |

|    |                |                                                              |
|----|----------------|--------------------------------------------------------------|
| 1  |                |                                                              |
| 2  | 36083 TG80800  | Accidental burning or scalding caused by chocolate           |
| 3  | 61858 S4D1100  | Open fracture-dislocation, metacarpophalangeal joint         |
| 4  | 48859 S210500  | Closed fracture scapula, spine                               |
| 5  | 11453 7K1LB00  | Closed reduction of fracture of hallux                       |
| 6  | 48159 7J42.11  | Other reduction of fracture of spine and stabilisation       |
| 7  | 40394 S125000  | Closed fracture larynx                                       |
| 8  | 37361 SC19.00  | Late effect of burn NOS                                      |
| 9  | 61676 SD2y.00  | Superficial injury shoulder/upper arm NOS, without infection |
| 10 | 86006 7G1M200  | Glue closure of skin wound                                   |
| 11 | 32936 SD10500  | Abrasion, buttock                                            |
| 12 | 20379 7K6F400  | Open reduction of # dislocation of joint+fxn of jnt,unspec   |
| 13 | 47212 SF11100  | Crush injury, buttock                                        |
| 14 | 100317 S491700 | Open dislocation C6/C7                                       |
| 15 | 22780 7J13.00  | Reduction of fracture of maxilla                             |
| 16 | 40305 S930100  | Open wound, finger, multiple                                 |
| 17 | 29189 N083p00  | Recurrent dislocation of the patella                         |
| 18 | 7099 SH3z.00   | Burn of the arm (excluding wrist and hand) NOS               |
| 19 | 70238 SF30.00  | Crush injury, hip and thigh                                  |
| 20 | 28510 S92z.00  | Open wound of hand, excluding fingers, NOS                   |
| 21 | 55412 S4C2400  | Closed fracture-subluxation lunate (volar)                   |
| 22 | 37974 SB31.00  | Brachial blood vessel injury                                 |
| 23 | 5009 S348.00   | Fracture of medial malleolus                                 |
| 24 | 19375 S4D0400  | Closed fracture-dislocation, proximal interphalangeal joint  |
| 25 | 19341 SD70100  | Abrasion, toe                                                |
| 26 | 19323 SD60300  | Abrasion, lower leg                                          |
| 27 | 17214 SE32100  | Contusion, wrist                                             |
| 28 | 102225 S251C00 | Open fracture thumb metacarpal head                          |
| 29 | 61526 SJ51000  | Closed injury, median nerve                                  |
| 30 | 16906 SE1..00  | Contusion, eye and adnexa                                    |
| 31 | 23845 7K6F300  | Open reduction of dislocation of jt+fxn of joint, unspec     |
| 32 | 38943 S4F7.00  | Open fracture-subluxation, patello-femoral joint             |
| 33 | 19186 S222000  | Closed fracture of humerus NOS                               |
| 34 | 57612 S85z.00  | Open wound of chest wall NOS                                 |
| 35 | 61556 S361300  | Open fracture multiple phalanges, toe                        |
| 36 | 50011 S49x.00  | Other closed multiple and ill-defined dislocation            |
| 37 | 3095 7J03100   | Reduction of fracture of nasal bones NEC                     |
| 38 | 96406 S010z00  | Closed #skull bse no intracranial injury + concussion unspec |
| 39 | 35866 7K6H400  | Revision to closed reduction of fracture dislocation alone   |
| 40 | 18841 S4D1.00  | Open fracture-dislocation digit                              |
| 41 | 50223 S231000  | Open fracture of proximal forearm, unspecified               |
| 42 | 102014 S751.00 | Open injury of spleen                                        |
| 43 | 96731 S624z00  | Extradural h'ge inj no open intracran wnd+concussion unspec  |
| 44 | 27922 S10B300  | Fracture of ilium                                            |
| 45 | 60368 S431600  | Open traumatic dislocation lunate (volar)                    |
| 46 | 18584 S345.00  | Open fracture ankle, bimalleolar                             |
| 47 | 93300 S40..12  | Dislocation of maxilla, inferior                             |
| 48 | 61845 SA12z00  | Open wound of knee/leg/ankle with tendon involvement, NOS    |
| 49 | 99284 SH13300  | Full thickness burn of the lip(s)                            |
| 50 | 10304 SH1z.00  | Burn of the face, head or neck NOS                           |
| 51 | 71934 SD20z00  | Abrasion/friction burn shoulder/upper arm, no infection, NOS |

|    |                |                                                             |
|----|----------------|-------------------------------------------------------------|
| 1  |                |                                                             |
| 2  | 4528 7K1G.00   | Other primary open reduction of fracture of bone            |
| 3  | 101031 S336000 | Fracture tibial plateau                                     |
| 4  | 18388 S343.00  | Open fracture ankle, lateral malleolus                      |
| 5  | 6915 S234B00   | Closed fracture radial styloid                              |
| 6  | 6821 SD3y000   | Superficial injury of elbow NOS                             |
| 7  |                |                                                             |
| 8  | 32866 S313.11  | Open fracture of femur, distal end                          |
| 9  | 18325 S83..00  | Other open wound of head                                    |
| 10 | 68229 S300y11  | Closed fracture of femur, subcapital                        |
| 11 | 101524 TG81011 | Accidental burning by Hydrofluoric acid                     |
| 12 | 7402 SE31.00   | Contusion, elbow or forearm                                 |
| 13 | 55086 S75z.00  | Injury to spleen NOS                                        |
| 14 | 18273 S30y.00  | Closed fracture of neck of femur NOS                        |
| 15 | 68652 S120800  | Closed fracture of eight or more ribs                       |
| 16 | 2251 S024100   | Closed fracture zygoma                                      |
| 17 | 18086 SE25.00  | Contusion of pelvic region                                  |
| 18 | 10608 SJ5y100  | Injury of multiple nerves at forearm level                  |
| 19 | 6168 S240100   | Closed fracture of the scaphoid                             |
| 20 | 95608 S451.00  | Open traumatic dislocation of hip                           |
| 21 | 6149 SD8..00   | Superficial injury of eye and adnexa                        |
| 22 | 62808 S260A00  | Closed fracture thumb distal phalanx, shaft                 |
| 23 | 22375 S24..00  | Fracture of carpal bone                                     |
| 24 | 3573 S10x.00   | Closed fracture of spine, unspecified,                      |
| 25 | 66514 TL9..00  | Homicide                                                    |
| 26 | 50509 SH1..12  | Head burns                                                  |
| 27 | 71063 S712200  | Lung laceration without mention of open wound into thorax   |
| 28 | 24587 S4E..00  | Fracture-dislocation or subluxation hip                     |
| 29 | 65260 SH14200  | Deep full thickness burn of eye without loss of body part   |
| 30 | 62723 SF31.00  | Crush injury, knee and lower leg                            |
| 31 | 23623 S84..00  | Open wound of neck                                          |
| 32 | 65690 S300200  | Closed fracture proximal femur, midcervical section         |
| 33 | 25508 SD40100  | Abrasion, hand, dorsum                                      |
| 34 | 42049 SD1y900  | Superficial injury of perineum NOS without major open wound |
| 35 | 88784 7J13y00  | Other specified reduction of fracture of maxilla            |
| 36 | 102302 S234G00 | Greenstick fracture of distal radius                        |
| 37 | 7142 SD21.00   | Abrasion or friction burn of shoulder/upper arm, infected   |
| 38 | 14848 S410500  | Closed traumatic dislocation scapula                        |
| 39 | 17467 S8...12  | Open wound of head                                          |
| 40 | 44887 SC17.00  | Late effect of burn of arm, leg and foot                    |
| 41 | 17443 7J12.11  | Reduction of fracture of jaw NEC                            |
| 42 | 21427 SD1yA00  | Superficial injury of penis NOS, without major open wound   |
| 43 | 21743 SA2..11  | Open wound of heel                                          |
| 44 | 32894 SK1E200  | Injury of multiple muscles and tendons at lower leg level   |
| 45 | 28434 SE23400  | Contusion of sacral region                                  |
| 46 | 27404 S102.00  | Closed fracture thoracic vertebra                           |
| 47 | 97820 S225900  | Open fracture distal humerus, bicondylar (T-Y fracture)     |
| 48 | 51522 SH11500  | Superficial burn of the nose                                |
| 49 | 51455 S84x.00  | Other open wound of neck                                    |
| 50 | 9394 SD40.00   | Abrasion/friction burn of hand, without infection           |
| 51 | 41925 TG9z000  | Accidental burn or other injury from electric current NOS   |
| 52 | 96863 S724.00  | Injury of bronchus                                          |



|    |                |                                                              |
|----|----------------|--------------------------------------------------------------|
| 1  |                |                                                              |
| 2  | 29611 S820.00  | Open wound of external ear                                   |
| 3  | 17174 7K6G600  | Closed reduction of dislocation of finger                    |
| 4  | 41650 SH01.00  | Other burns of eyelids and periocular area                   |
| 5  | 44736 S837.00  | Open wound in mouth with complication                        |
| 6  |                |                                                              |
| 7  | 65724 S000000  | Closed #skull vlt no intracranial injury, unspec state consc |
| 8  | 73724 SD1yC00  | Superficial injury of vulva NOS, without major open wound    |
| 9  | 62677 SH24.00  | Deep full thickness burn of trunk without loss of body part  |
| 10 | 57109 SF22800  | Open crush injury hand, dorsum                               |
| 11 | 17061 SD21300  | Abrasion of upper arm, infected                              |
| 12 |                |                                                              |
| 13 | 69354 SF20200  | Crush injury, axillary region                                |
| 14 | 34307 S260P00  | Closed fracture finger middle phalanx, head                  |
| 15 | 11220 SD1y400  | Superficial injury of back NOS, without major open wound     |
| 16 | 21175 S250x00  | Closed fractures of multiple sites of unspecified metacarpus |
| 17 | 65179 S903200  | Degloving injury, axilla                                     |
| 18 |                |                                                              |
| 19 | 70674 S133z00  | Open fracture of pubis NOS                                   |
| 20 | 18338 S260F00  | Closed fracture finger proximal phalanx, shaft               |
| 21 | 69824 SR13.00  | Fractures involving multiple regions of one lower limb       |
| 22 | 16890 S022.12  | Fracture of lower jaw, closed                                |
| 23 | 3288 S10A.00   | Fracture of neck                                             |
| 24 |                |                                                              |
| 25 | 48544 S942.11  | Multiple/unspec open wound of upper limb with tendon injury  |
| 26 | 73342 SJ52600  | Open injury, ulnar nerve, palmar sensory                     |
| 27 | 93142 7K6F600  | Primary open reduction of dislocation and skeletal traction  |
| 28 | 16769 TC7..00  | Fracture, cause unspecified                                  |
| 29 |                |                                                              |
| 30 | 35355 SH50100  | Unspecified thickness burn of the toe(s)                     |
| 31 | 48925 S353z00  | Open fracture of tarsal and metatarsal bones NOS             |
| 32 | 64441 SB0..00  | Injury to blood vessels of head and neck                     |
| 33 | 33412 SH22.00  | Partial thickness burn of the trunk                          |
| 34 | 58029 S901x00  | Multiple open wounds of upper arm with complication          |
| 35 | 16895 N1y1.00  | Fatigue fracture of vertebra                                 |
| 36 |                |                                                              |
| 37 | 70919 7K1Ly00  | Other specified other closed reduction of fracture of bone   |
| 38 | 45410 7J41z00  | Decompression of fracture of spine NOS                       |
| 39 | 14725 SH9z.00  | Burn - unspecified                                           |
| 40 | 59167 SH22800  | Deep partial thickness burn of the breast                    |
| 41 | 56137 TK52.00  | Suicide and selfinflicted injury by hunting rifle            |
| 42 | 31854 TK4..00  | Suicide and selfinflicted injury by drowning                 |
| 43 |                |                                                              |
| 44 | 16277 S100200  | Closed fracture axis                                         |
| 45 | 60630 S235000  | Open fracture of forearm, lower end, unspecified             |
| 46 | 51853 S8...13  | Open wound of trunk                                          |
| 47 | 4845 SK17400   | Calf injury                                                  |
| 48 |                |                                                              |
| 49 | 73502 S913100  | Degloving injury, elbow area                                 |
| 50 | 343 S234100    | Closed Colles' fracture                                      |
| 51 | 28724 S224700  | Closed fracture distal humerus, medial epicondyle            |
| 52 | 28273 S321.00  | Open fracture of the patella                                 |
| 53 |                |                                                              |
| 54 | 109424 SD1z.00 | Superficial injury of trunk NOS, infected                    |
| 55 | 721 S0...00    | Fracture of skull                                            |
| 56 | 67454 SD1yz00  | Superficial injury trunk, without major wound/infection NOS  |
| 57 | 16053 SH70200  | Burn of the tongue                                           |
| 58 | 15953 S72z.00  | Intrathoracic organ injury NOS                               |
| 59 | 58999 SC11.00  | Late effect of open wound arm or leg without tendon injury   |
| 60 | 15878 S835000  | Open wound of face with complication, unspecified            |



|    |                |                                                              |
|----|----------------|--------------------------------------------------------------|
| 1  |                |                                                              |
| 2  | 103695 SJ21B00 | Incompl thoracic cord injury,unsp,without bony injury, T7-12 |
| 3  | 285 S83z.00    | Open wound of head NOS                                       |
| 4  | 5080 SH0.00    | Burn confined to eye and adnexa                              |
| 5  | 33763 SH51100  | Superficial burn of the toe(s)                               |
| 6  | 5332 S312300   | Closed fracture distal femur, supracondylar                  |
| 7  | 40164 S330500  | Closed fracture proximal tibia, bicondylar                   |
| 8  | 94264 TG80900  | Accidental burning or scalding caused by milk                |
| 9  | 15613 S100000  | Closed fracture of unspecified cervical vertebra             |
| 10 | 15580 S480500  | Cls traumatic dislocation, metatarso-phalangeal jnt, single  |
| 11 | 55356 S4D2300  | Closed fracture-subluxation, distal interphalangeal joint    |
| 12 | 9009 SD0y000   | Superficial injury of face NOS                               |
| 13 | 32724 SH52300  | Superficial partial thickness burn of the ankle              |
| 14 | 15491 S4G.00   | Fracture-dislocation or subluxation ankle                    |
| 15 | 7723 S337.00   | Fracture of shaft of tibia                                   |
| 16 | 29878 S833.00  | Open wound of nose with complication                         |
| 17 | 27976 SH40.00  | Unspecified thickness burn of the wrist and hand             |
| 18 | 101859 SJ4y.00 | Other trunk nerve injury                                     |
| 19 | 34043 SH43000  | Full thickness burn of the hand, unspecified                 |
| 20 | 58845 SF20z00  | Crush injury, shoulder and upper arm NOS                     |
| 21 | 12142 SE0..11  | Bruise of face                                               |
| 22 | 25098 SD7z000  | Superficial injury of foot NOS, infected                     |
| 23 | 63738 SJ57000  | Closed injury, suprascapular nerve                           |
| 24 | 8774 SH5z.00   | Burn of the lower limb NOS                                   |
| 25 | 37801 SH41.12  | First degree burn of finger                                  |
| 26 | 28177 SJ32.00  | Lumbar nerve root injury                                     |
| 27 | 71521 SJ22.00  | Lumbar cord injury without spinal bone injury                |
| 28 | 41913 SH43500  | Full thickness burn of the palm of hand                      |
| 29 | 73229 S940.00  | Multiple/unspec open wound upper limb without complication   |
| 30 | 40765 SB00100  | Common carotid artery injury                                 |
| 31 | 105693 SB1z.00 | Thoracic blood vessel injury NOS                             |
| 32 | 33475 S321200  | Open fracture patella, distal pole                           |
| 33 | 14865 SD91.00  | Abrasion or friction burn, infected, NOS                     |
| 34 | 8138 SD10.00   | Abrasion, trunk                                              |
| 35 | 21763 SH6..00  | Burn of multiple specified sites                             |
| 36 | 96430 TKx7.00  | Suicide and selfinflicted injury caustic subst, excl poison  |
| 37 | 52862 SA0z.00  | Open wound of hip and thigh NOS                              |
| 38 | 100294 S441600 | Open traumatic dislocation multiple digits                   |
| 39 | 30288 7J13000  | Reduction of fracture of alveolus of maxilla                 |
| 40 | 383 SH91.11    | First degree burn                                            |
| 41 | 15887 S790.00  | Internal injury without open wound into cavity NOS           |
| 42 | 9468 S4B0000   | Closed fracture-dislocation elbow joint                      |
| 43 | 46768 S7A..00  | Injury of pancreas                                           |
| 44 | 47984 SB13.00  | Superior vena cava injury                                    |
| 45 | 27554 S811.00  | Ocular laceration with intraocular prolapse                  |
| 46 | 62536 SB32100  | Open injury, radial artery                                   |
| 47 | 52441 SH42500  | Superficial partial thickness burn of palm of hand           |
| 48 | 59300 SJ5x.00  | Other shoulder girdle and upper limb nerve injury            |
| 49 | 20171 SJ15.00  | Acoustic (8th) nerve injury                                  |
| 50 | 12864 SF02.00  | Crush injury, neck                                           |
| 51 | 97827 S496011  | Closed dislocation of sternoclavicular joint                 |

|    |                |                                                              |
|----|----------------|--------------------------------------------------------------|
| 1  |                |                                                              |
| 2  | 44635 7K6Hz00  | Secondary reduction of traumatic dislocation of joint NOS    |
| 3  | 53894 SH55100  | Deep full thickness burn of toe(s), with loss of body part   |
| 4  | 66434 S107.00  | Open fracture sacrum                                         |
| 5  | 30087 SE22100  | Contusion, flank                                             |
| 6  | 48279 SH33.00  | Full thickness burn of the arm                               |
| 7  | 65197 S73z.00  | Injury to gastrointestinal tract, NOS                        |
| 8  | 73601 S105000  | Open fracture lumbar vertebra, burst                         |
| 9  | 12729 SE30011  | Shoulder bruise                                              |
| 10 | 62005 S480000  | Closed traumatic dislocation of foot, unspecified            |
| 11 | 12663 S832.00  | Open wound of nose                                           |
| 12 | 33961 S134.00  | Other or multiple closed fracture of pelvis                  |
| 13 | 15079 S352100  | Closed fracture of talus                                     |
| 14 | 28708 S234600  | Closed fracture radius and ulna, distal                      |
| 15 | 12546 S250400  | Closed fracture finger metacarpal neck                       |
| 16 | 37576 SH21300  | Superficial burn of the abdominal wall                       |
| 17 | 57340 SH73.00  | Burn of the gastrointestinal tract                           |
| 18 | 2139 TG81.00   | Accidental burning caused by caustic and corrosive substance |
| 19 | 12503 SE20.00  | Contusion, breast                                            |
| 20 | 104846 SB30400 | Open injury, axillary vein                                   |
| 21 | 56457 SK1W.00  | Injury of unspecified muscle and tendon of trunk             |
| 22 | 64806 SB11.00  | Innominate (brachiocephalic) artery injury                   |
| 23 | 102043 S112A00 | Cls spinal fracture with posterior thorac cord lesion, T7-12 |
| 24 | 99203 S135y00  | Other open fracture of pelvis                                |
| 25 | 100281 SD1z000 | Superficial injury of interscapular region NOS, infected     |
| 26 | 94411 S032.00  | Open #skull NOS without mention of intracranial injury       |
| 27 | 11004 S120900  | Closed fracture multiple ribs                                |
| 28 | 20744 7J42.00  | Other reduction of fracture of spine                         |
| 29 | 57190 S022700  | Closed fracture of mandible, alveolar border of body         |
| 30 | 36527 S4D2100  | Closed fracture-subluxation, metacarpophalangeal joint       |
| 31 | 67389 S492300  | Closed spinal dislocation with complete thoracic cord lesion |
| 32 | 12219 SD70.12  | Abrasion or friction burn of toenail, without infection      |
| 33 | 42990 S4D0000  | Closed fracture-dislocation digit, unspecified               |
| 34 | 55682 S761200  | Kidney laceration with open wound into cavity                |
| 35 | 12132 S91..00  | Open wound of elbow, forearm and wrist                       |
| 36 | 60615 S113.00  | Open fracture of thoracic spine with spinal cord lesion      |
| 37 | 12112 SH11100  | Superficial burn of the ear                                  |
| 38 | 36449 7K1Ez00  | Prim open reduction fracture bone & extramedull fixation NOS |
| 39 | 65904 S900100  | Open wound of scapular region                                |
| 40 | 60412 7J13600  | Reduction of Le Fort 3 fracture of maxilla                   |
| 41 | 12063 S230B00  | Closed fracture olecranon, intra-articular                   |
| 42 | 10007 S338.00  | Fracture of lower end of tibia                               |
| 43 | 44431 S270.00  | Closed multiple fractures of hand bones                      |
| 44 | 41675 S01..13  | Frontal sinus fracture                                       |
| 45 | 2642 S022.00   | Fracture of mandible, closed                                 |
| 46 | 7930 7K1F500   | Primary open reduction fracture patella fixat tension band   |
| 47 | 3404 S93..00   | Open wound of finger(s) or thumb                             |
| 48 | 36084 TKx2.00  | Suicide and selfinflicted injury by scald                    |
| 49 | 4211 S20..11   | Collar bone fracture                                         |
| 50 | 67822 SB34300  | Injury of deep palmar arch                                   |
| 51 | 18361 7K6G300  | Closed reduction of dislocation of shoulder                  |

|    |                |                                                              |
|----|----------------|--------------------------------------------------------------|
| 1  |                |                                                              |
| 2  | 11702 SD2y300  | Superficial injury of upper arm NOS                          |
| 3  | 53650 S250C00  | Closed fracture thumb metacarpal head                        |
| 4  | 43338 S77..11  | Internal pelvic injury                                       |
| 5  | 14826 S344.11  | Dupuytren's fracture, fibula                                 |
| 6  | 59647 SA10z00  | Open wound of knee, leg and ankle NOS                        |
| 7  | 11515 S910100  | Open wound of elbow                                          |
| 8  | 45356 SD10300  | Abrasion, abdominal wall                                     |
| 9  | 28304 SH00.00  | Chemical burn of eyelids and periocular area                 |
| 10 | 50460 7K1Fz00  | Primary open reduction of intraarticular fracture bone NOS   |
| 11 | 105332 SJ15.11 | Auditory cranial nerve injury                                |
| 12 | 64139 S13z.00  | Open fracture of pelvis NOS                                  |
| 13 | 66961 TN20.00  | Injury ?accidental, poisoning by motor vehicle exhaust gas   |
| 14 | 59900 SF2z.00  | Crush injury, upper limb NOS                                 |
| 15 | 12525 SD61200  | Abrasion of knee, infected                                   |
| 16 | 48958 S112100  | Cls spinal fracture wth complete thoracic cord lesion,T1-6   |
| 17 | 61315 S410311  | Inferior dislocation of shoulder                             |
| 18 | 104754 TN02.00 | Injury ?accidental, poisoning by other sedative/hypnotic     |
| 19 | 11275 S3X..00  | Fracture of lower leg, part unspecified                      |
| 20 | 48224 S121.00  | Open fracture rib                                            |
| 21 | 45344 S903300  | Degloving injury, upper arm                                  |
| 22 | 9261 S4C1000   | Open fracture-dislocation, distal radio-ulnar joint          |
| 23 | 11222 S220.00  | Closed fracture of the proximal humerus                      |
| 24 | 108479 S751300 | Spleen parenchyma laceration with open wound into cavity     |
| 25 | 28079 S600.00  | Concussion with no loss of consciousness                     |
| 26 | 58611 SA00.00  | Open wound of hip and thigh without mention of complication  |
| 27 | 30956 S11x.00  | Closed fracture of spine with spinal cord lesion unspecified |
| 28 | 21161 SE11.11  | Bruise of eyelids                                            |
| 29 | 89236 7403900  | Surgical outfracture of turbinate of nose                    |
| 30 | 34194 S496100  | Closed traumatic dislocation of pelvis                       |
| 31 | 62955 S000100  | Closed #skull vlt no intracranial injury, no loss of consc   |
| 32 | 24790 S026.00  | Closed orbital blow-out fracture                             |
| 33 | 109115 S353800 | Open fracture talus, head                                    |
| 34 | 29748 S352D00  | Closed fracture metatarsal neck                              |
| 35 | 60206 SJ53000  | Closed injury, radial nerve                                  |
| 36 | 44861 SH52z00  | Partial thickness burn of the leg NOS                        |
| 37 | 73047 S772.00  | Ureter injury without mention of open wound into cavity      |
| 38 | 10764 SE42011  | Heel bruise                                                  |
| 39 | 14847 7K6Fz00  | Primary open reduction of traumatic dislocation of joint NOS |
| 40 | 65494 S4D3400  | Open fracture-subluxation, proximal interphalangeal joint    |
| 41 | 17150 SC17.11  | Late effect of burn of arm or leg                            |
| 42 | 38480 SC3D100  | Sequelae of dislocation, sprain and strain of lower limb     |
| 43 | 5381 S15..00   | Fracture of thoracic vertebra                                |
| 44 | 71148 SH22B00  | Deep partial thickness burn of the back (excluding buttock)  |
| 45 | 52895 S250700  | Closed fracture finger metacarpal, multiple                  |
| 46 | 17360 SK10800  | Injury of muscle and tendon at neck level                    |
| 47 | 10640 S23..11  | Forearm fracture                                             |
| 48 | 35388 SJ67.00  | Injury of nerves at ankle and foot level                     |
| 49 | 60531 SH22C00  | Deep partial thickness burn of the buttock                   |
| 50 | 61484 SD0z000  | Superficial injury of face NOS, infected                     |
| 51 | 52746 SH52B00  | Deep partial thickness burn of the lower leg                 |

|    |                |                                                              |
|----|----------------|--------------------------------------------------------------|
| 1  |                |                                                              |
| 2  | 33489 S220200  | Closed fracture of proximal humerus, anatomical neck         |
| 3  | 67296 SJ00.00  | Optic nerve (2nd) injury                                     |
| 4  | 10616 SE31000  | Contusion, forearm area                                      |
| 5  | 7636 S231600   | Open fracture radial head                                    |
| 6  | 20281 SE24.00  | Contusion, genital organs                                    |
| 7  | 21998 SJ31.00  | Thoracic nerve root injury                                   |
| 8  | 68233 7K6H600  | Secondary open reduction dislocation joint+fixation jnt,unsp |
| 9  | 41890 SH51500  | Superficial burn of the knee                                 |
| 10 | 48878 SK1x900  | Open wounds involv thorax with abdomen,lwr back and pelvis   |
| 11 | 27378 S49x.12  | Back dislocation NOS                                         |
| 12 | 95674 N1y2.00  | Pars interarticularis stress fracture                        |
| 13 | 105935 S107000 | Open compression fracture sacrum                             |
| 14 | 54625 S77A.00  | Injury of fallopian tube                                     |
| 15 | 94275 TG80C00  | Accidental burning or scalding caused by steam from kettle   |
| 16 | 92825 SH44200  | Deep full thickness burn of thumb without loss of body part  |
| 17 | 53665 SA32.00  | Open wound of toe(s) with tendon involvement                 |
| 18 | 99073 SJ16.00  | Accessory (11th) nerve injury                                |
| 19 | 1179 S28..11   | Ill-defined fracture of arm                                  |
| 20 | 33757 S260M00  | Closed fracture finger middle phalanx, shaft                 |
| 21 | 6569 S62..13   | Subdural haemorrhage following injury                        |
| 22 | 22370 S330400  | Closed fracture proximal tibia, lateral condyle (plateau)    |
| 23 | 16181 S83x.00  | Other open wound of head                                     |
| 24 | 93648 S465100  | Closed traumatic dislocation knee joint, anterior            |
| 25 | 8916 S47..13   | Dislocation of tibia, distal end                             |
| 26 | 8348 S4A0.00   | Closed fracture-dislocation shoulder                         |
| 27 | 35386 S211.00  | Open fracture of scapula                                     |
| 28 | 68104 SB33100  | Open injury, ulnar artery                                    |
| 29 | 10201 S64..11  | Brain injury NOS                                             |
| 30 | 35096 S104300  | Closed fracture lumbar vertebra, spinous process             |
| 31 | 28352 S33y100  | Open fracture of fibula, unspecified part, NOS               |
| 32 | 35035 SH50.00  | Unspecified thickness burn of the leg                        |
| 33 | 10106 SD60.11  | Abrasion or friction burn of leg, without infection          |
| 34 | 54353 S12X.00  | Fracture of bony thorax, part unspecified                    |
| 35 | 10095 S311100  | Open fracture shaft of femur                                 |
| 36 | 64207 S466.00  | Other open traumatic dislocation of knee                     |
| 37 | 28320 S773.00  | Ureter injury with open wound into cavity                    |
| 38 | 10022 S235.11  | Wrist fracture - open                                        |
| 39 | 2303 S237.00   | Fracture of upper end of radius                              |
| 40 | 10008 N338.00  | Malunion and nonunion of fracture                            |
| 41 | 96903 7K1KA00  | Revision to functional bracing of fracture                   |
| 42 | 61837 SB0z.00  | Head and neck blood vessel injury NOS                        |
| 43 | 96136 S4C0500  | Closed fracture-dislocation peri-lunate (dorsal)             |
| 44 | 24025 SC21.00  | Late effect of cranial nerve injury                          |
| 45 | 62719 S101611  | C6 vertebra open fracture without spinal cord lesion         |
| 46 | 68670 N082211  | Elbow pathological dislocation                               |
| 47 | 9771 S020.11   | Closed fracture nasal bone                                   |
| 48 | 1084 SE...00   | Contusion (bruise) with intact skin                          |
| 49 | 100118 S73x600 | Closed injury of pancreas                                    |
| 50 | 9727 7K1H.00   | Secondary open reduction of fracture of bone                 |
| 51 | 99397 S261600  | Open fracture thumb proximal phalanx, neck                   |
| 52 |                |                                                              |
| 53 |                |                                                              |
| 54 |                |                                                              |
| 55 |                |                                                              |
| 56 |                |                                                              |
| 57 |                |                                                              |
| 58 |                |                                                              |
| 59 |                |                                                              |
| 60 |                |                                                              |

|    |                |                                                             |
|----|----------------|-------------------------------------------------------------|
| 1  |                |                                                             |
| 2  | 9688 S127.00   | Fracture of rib                                             |
| 3  | 9670 SE41000   | Contusion, lower leg                                        |
| 4  | 51518 SD11100  | Abrasion of chest wall, infected                            |
| 5  | 50634 S250A00  | Closed fracture thumb metacarpal shaft                      |
| 6  | 36543 SB35200  | Closed injury, digital vein                                 |
| 7  |                |                                                             |
| 8  | 9538 S230100   | Closed fracture olecranon, extra-articular                  |
| 9  | 52318 S310z00  | Closed fracture of shaft or unspecified part, NOS           |
| 10 | 12615 SE1..11  | Bruise of eye                                               |
| 11 | 17469 SJ56600  | Injury of digital nerve of thumb                            |
| 12 |                |                                                             |
| 13 | 9420 S221.00   | Open fracture of the proximal humerus                       |
| 14 | 2439 SK10900   | Scalp injury                                                |
| 15 | 9348 S3x3.00   | Multiple fractures of lower leg                             |
| 16 | 4978 S02x100   | Fracture of orbit NOS, closed                               |
| 17 | 57977 SH41.14  | First degree burn of thumb                                  |
| 18 |                |                                                             |
| 19 | 108083 SB23100 | Inferior mesenteric vein injury                             |
| 20 | 66237 S292100  | Open multiple fractures of clavicle, scapula and humerus    |
| 21 | 28271 SBz..00  | Injury to blood vessel NOS                                  |
| 22 | 16779 SF00100  | Crush injury, ear                                           |
| 23 | 49588 S241E00  | Open fracture scaphoid, tuberosity                          |
| 24 |                |                                                             |
| 25 | 9212 S34z.00   | Fracture of ankle, NOS                                      |
| 26 | 62803 SE30y00  | Contusion, shoulder and upper arm, multiple sites           |
| 27 | 71207 S221200  | Open fracture of proximal humerus, anatomical neck          |
| 28 | 18336 S261.00  | Open fracture of one or more phalanges of hand              |
| 29 | 44673 S4H2.00  | Closed fracture-subluxation, foot                           |
| 30 |                |                                                             |
| 31 | 99251 SA33000  | Degloving injury toe                                        |
| 32 | 43972 S4B1.00  | Open fracture-dislocation elbow                             |
| 33 | 64435 S4C0400  | Closed fracture-dislocation lunate (volar)                  |
| 34 | 9094 SD30.00   | Abrasion or friction burn of lower arm, without infection   |
| 35 | 30150 S911.00  | Open wound of lower arm with complication                   |
| 36 |                |                                                             |
| 37 | 105683 SH44700 | Deep full thickness burn of wrist without loss of body part |
| 38 | 62028 SH35400  | Deep full thickness burn of axilla, with loss of body part  |
| 39 | 65688 S4H1500  | Open #-dislocation, metatarsophalangeal joint, multiple     |
| 40 | 8460 SK13300   | Unspecified injury of wrist                                 |
| 41 | 42205 SH92100  | Deep partial thickness burn NOS                             |
| 42 |                |                                                             |
| 43 | 61150 S104200  | Closed fracture lumbar vertebra, spondylolysis              |
| 44 | 27992 S335.00  | Open fracture distal tibia                                  |
| 45 | 67097 S260Q00  | Closed fracture finger middle phalanx, multiple             |
| 46 | 67024 SJ60100  | Open injury sciatic nerve                                   |
| 47 |                |                                                             |
| 48 | 67394 S301700  | Open fracture proximal femur,subcapital, Garden grade II    |
| 49 | 70226 S351100  | Open fractures calcaneus, intra-articular                   |
| 50 | 50155 SJ24.00  | Cauda equina injury without bony injury                     |
| 51 | 8783 S44..00   | Dislocation or subluxation of finger or thumb               |
| 52 | 8780 S41z.00   | Dislocation of shoulder NOS                                 |
| 53 |                |                                                             |
| 54 | 58065 S352500  | Closed fracture intermediate cuneiform                      |
| 55 | 52513 S471.00  | Open traumatic dislocation ankle joint                      |
| 56 | 106489 S740400 | Liver major laceration without open wound into cavity       |
| 57 | 8661 S224600   | Closed fracture distal humerus, lateral epicondyle          |
| 58 | 60687 SJA0.00  | Concussion and oedema of lumbar spinal cord                 |
| 59 | 71845 SB22700  | Inferior mesenteric artery injury                           |
| 60 | 9309 SH5..00   | Burn of lower limbs                                         |



|    |                |                                                              |
|----|----------------|--------------------------------------------------------------|
| 1  |                |                                                              |
| 2  | 28399 TN51.00  | Injury ?accidental, by shotgun                               |
| 3  | 39787 S430600  | Closed traumatic dislocation lunate (volar)                  |
| 4  | 39822 SJ30600  | Cervical nerve root injury - C7                              |
| 5  | 46267 S740100  | Liver haematoma and contusion without open wound into cavity |
| 6  |                |                                                              |
| 7  | 70894 7K6GG00  | Closed reduction of dislocation of spine                     |
| 8  | 33918 SC0X.00  | Sequelae of other fracture of thorax and pelvis              |
| 9  | 8465 S334100   | Closed fracture distal tibia, intra-articular                |
| 10 | 32214 S644.00  | Focal brain injury                                           |
| 11 | 10617 SD60400  | Abrasion, ankle                                              |
| 12 |                |                                                              |
| 13 | 26283 SC22.00  | Late effect of spinal cord injury                            |
| 14 | 100202 S33C.00 | Closed fracture of distal tibia and fibula                   |
| 15 | 8382 S238.00   | Fracture of shaft of ulna                                    |
| 16 | 94372 S911z00  | Open wound of lower arm with complication, NOS               |
| 17 | 69363 S261N00  | Open fracture finger middle phalanx, neck                    |
| 18 |                |                                                              |
| 19 | 101489 SK17600 | Posterolateral corner injury of knee                         |
| 20 | 8302 S260.00   | Closed fracture of one or more phalanges of hand             |
| 21 | 18299 S234.00  | Closed fracture of radius and ulna, lower end                |
| 22 | 68899 S29..13  | Multiple fractures of sternum                                |
| 23 | 46132 SJ11.11  | Fourth cranial nerve injury                                  |
| 24 |                |                                                              |
| 25 | 71492 TN9..00  | Injury ?accidental, late effects                             |
| 26 | 62513 SH54500  | Deep full thickness burn of knee without loss of body part   |
| 27 | 55424 S120500  | Closed fracture of five ribs                                 |
| 28 | 1023 S830.00   | Open wound of scalp                                          |
| 29 | 42139 S260B00  | Closed fracture thumb distal phalanx, tuft                   |
| 30 |                |                                                              |
| 31 | 8197 SE2..11   | Bruise, trunk                                                |
| 32 | 8150 S903000   | Degloving injury, shoulder area                              |
| 33 | 11635 S352200  | Closed fracture navicular                                    |
| 34 | 55346 S100x00  | Multiple closed fractures of cervical vertebrae              |
| 35 |                |                                                              |
| 36 | 101560 S121z00 | Open fracture of rib(s) NOS                                  |
| 37 | 3809 S00..11   | Frontal bone fracture                                        |
| 38 | 46142 S04..00  | Multiple fractures involving skull or face with other bones  |
| 39 | 28729 SB00.00  | Carotid artery injury                                        |
| 40 | 68657 SD6z400  | Superficial injury of ankle NOS, infected                    |
| 41 |                |                                                              |
| 42 | 70086 7433300  | Reduction of laryngeal fracture                              |
| 43 | 33651 S260700  | Closed fracture thumb proximal phalanx, head                 |
| 44 | 71725 S011400  | Closed #skull bse + intracranial injury, >24hr LOC+recovery  |
| 45 | 17956 S201200  | Open fracture clavicle, shaft                                |
| 46 | 65141 S241.00  | Open fracture of carpal bone                                 |
| 47 |                |                                                              |
| 48 | 95842 S104500  | Closed fracture lumbar vertebra, posterior arch              |
| 49 | 69789 SJ5C000  | Closed injury, posterior interosseous nerve                  |
| 50 | 50647 S430z00  | Closed traumatic dislocation of wrist NOS                    |
| 51 | 68688 SH43.14  | Third degree burn of wrist                                   |
| 52 | 35011 S32z.00  | Fracture of patella, NOS                                     |
| 53 |                |                                                              |
| 54 | 7671 SE4..00   | Contusion, lower limb and other unspecified sites            |
| 55 | 73768 S211000  | Open fracture of scapula, unspecified part                   |
| 56 | 60481 SH10x00  | Unspecified thickness burn multiple sites face, head or neck |
| 57 | 11333 7K1K800  | Primary external fixation of fracture                        |
| 58 | 43566 S343000  | Open fracture ankle, lateral malleolus, low                  |
| 59 | 64167 S003000  | Open #skull vlt + intracranial injury, unspec state of consc |
| 60 | 51971 TN87.00  | Injury ?accidental, by caustic substances, except poisoning  |

|    |                |                                                              |
|----|----------------|--------------------------------------------------------------|
| 1  |                |                                                              |
| 2  | 72689 SB43z00  | Saphenous vein injury NOS                                    |
| 3  | 46623 TN84.00  | Injury ?accidental, by electrocution                         |
| 4  | 69267 SH32.11  | Blister of arm, second degree burn                           |
| 5  | 73165 S240F00  | Closed fracture carpal bones, multiple                       |
| 6  | 25518 TG81000  | Accidental burning caused by acid                            |
| 7  | 11277 S150.00  | Multiple fractures of thoracic spine                         |
| 8  |                |                                                              |
| 9  | 109332 SH34000 | Deep full thickness burn of arm unsp, no loss of body part   |
| 10 | 38656 SE33300  | Contusion, finger, multiple                                  |
| 11 | 92268 S4H0600  | Closed fracture-dislocation, IPJ, multiple toes              |
| 12 | 72376 S933400  | Ring avulsion injury, class 3                                |
| 13 | 29612 Sz...00  | Injury and poisoning NOS                                     |
| 14 | 35145 SH12.00  | Partial thickness burn of the face, head or neck             |
| 15 | 90888 SJ54000  | Closed injury, musculo-cutaneous nerve                       |
| 16 | 38131 7K1LN00  | Closed reduction of fracture of upper limb                   |
| 17 | 12754 SH40.13  | Unspecified degree burn of thumb                             |
| 18 | 52371 S344100  | Closed fracture ankle, bimalleolar, high fibular fracture    |
| 19 | 62649 SP04C00  | Fracture of bone allograft                                   |
| 20 | 60402 SC00.12  | Late effect of skull fracture                                |
| 21 | 7054 SD61.11   | Abrasion or friction burn of leg, infected                   |
| 22 | 16081 S49x.11  | Arm dislocation NOS                                          |
| 23 | 48880 S80z.00  | Open wound of ocular adnexa NOS                              |
| 24 | 67856 SB43000  | Greater saphenous vein injury                                |
| 25 | 73109 S211400  | Open fracture scapula, blade                                 |
| 26 | 6996 SE0..00   | Contusion of face, scalp and neck, excluding eye(s)          |
| 27 | 95620 S100J00  | Closed fracture cervical vertebra, spondylolysis             |
| 28 | 69098 S101111  | C1 vertebra open fracture without spinal cord lesion         |
| 29 | 6942 7K1LL00   | Closed reduction of fracture of radius and or ulna           |
| 30 | 6925 SD4y.00   | Superficial injury of hand NOS, without mention of infection |
| 31 | 101565 SJ52100 | Closed injury, ulnar nerve, dorsal sensory                   |
| 32 | 100552 SB3x.00 | Multiple blood vessel injury of upper extremity              |
| 33 | 52004 TN06.00  | Injury ?accidental, poisoning by corrosive/caustic substance |
| 34 | 70659 SB1y200  | Internal mammary artery injury                               |
| 35 | 6881 S250z00   | Closed fracture of metacarpal bone(s) NOS                    |
| 36 | 43423 S4D1300  | Open fracture-dislocation, distal interphalangeal joint      |
| 37 | 66099 S353F00  | Open fracture metatarsal, multiple                           |
| 38 | 62689 SH31600  | Superficial burn of the scapular region                      |
| 39 | 67461 SB31000  | Closed injury, brachial artery                               |
| 40 | 100350 S4C2y00 | Closed fracture-subluxation other carpal                     |
| 41 | 94381 S900z00  | Open wound of shoulder and upper limb NOS                    |
| 42 | 33931 SH41000  | Superficial burn of the hand, unspecified                    |
| 43 | 43175 7L0H800  | Open reduction congenital dislocation of patella             |
| 44 | 106178 TK01z00 | Suicide and self inflicted injury by barbiturates            |
| 45 | 94127 S133y00  | Other specified open fracture of pubis                       |
| 46 | 6660 7K1L400   | Closed reduction of fracture of hip                          |
| 47 | 10382 S22z.00  | Fracture of humerus NOS                                      |
| 48 | 94655 S135800  | Open fracture dislocation of sacro-iliac joint               |
| 49 | 94460 S201z00  | Open fracture of clavicle NOS                                |
| 50 | 6392 S250.00   | Closed fracture of metacarpal bone(s)                        |
| 51 | 6388 SH4z.00   | Burn of wrist or hand NOS                                    |
| 52 | 45723 S12z.00  | Fracture of rib(s), sternum, larynx or trachea NOS           |



|    |                |                                                              |
|----|----------------|--------------------------------------------------------------|
| 1  |                |                                                              |
| 2  | 94585 S491x00  | Open dislocation of multiple cervical vertebrae              |
| 3  | 100345 S421300 | Open traumatic dislocation elbow joint, medial               |
| 4  | 6312 SD6yz00   | Superficial injury of lower limb, without infection, NOS     |
| 5  | 55442 SH32200  | Superficial partial thickness burn of the elbow              |
| 6  | 53948 SD6z200  | Superficial injury of knee NOS, infected                     |
| 7  | 44538 S230A00  | Closed fracture radius and ulna, proximal                    |
| 8  | 99591 SB30000  | Axillary vessel injury, unspecified                          |
| 9  | 25414 SA22.11  | Open wound of foot with tendon injury                        |
| 10 | 99508 7K6Gd00  | Primary closed reduction # dislocation+other extrnal immobil |
| 11 | 59613 S72y.00  | Multiple intrathoracic organ injury with open wnd to cavity  |
| 12 | 63402 S490600  | Closed dislocation C5/C6                                     |
| 13 | 5567 S01..19   | Temporal bone fracture                                       |
| 14 | 6195 S2...00   | Fracture of upper limb                                       |
| 15 | 62977 S010.00  | Closed fracture base of skull without intracranial injury    |
| 16 | 70946 TKx0.00  | Suicide + selfinflicted injury-jump/lie before moving object |
| 17 | 100159 S321100 | Open fracture patella, proximal pole                         |
| 18 | 96135 S751000  | Spleen injury with open wound into cavity, unspecified       |
| 19 | 33788 SF23100  | Closed crush injury, thumb                                   |
| 20 | 41558 S4D2000  | Closed fracture-subluxation digit, unspecified               |
| 21 | 91156 SH34300  | Deep full thickness burn of upper arm, no loss of body part  |
| 22 | 56079 TN2y.00  | Injury ?accidental, poisoning by other spec gas or vapour    |
| 23 | 34726 F552200  | Ear ossicle dislocation                                      |
| 24 | 63633 S331600  | Open fracture spine, tibia                                   |
| 25 | 29701 J012.00  | Abrasion of teeth                                            |
| 26 | 6196 SC20.11   | Late effect of head injury                                   |
| 27 | 27810 SJ61.00  | Femoral nerve injury                                         |
| 28 | 49571 SF32400  | Open crush injury, foot                                      |
| 29 | 5938 S5Q6.00   | Injury of tendon of the rotator cuff of shoulder             |
| 30 | 71630 SH42.11  | Blister of wrist and hand, second degree burn                |
| 31 | 4629 7K1L.00   | Other closed reduction of fracture of bone                   |
| 32 | 71500 S760z00  | Kidney injury without mention of open wound into cavity NOS  |
| 33 | 4582 S26z.00   | Fracture of one or more phalanges of hand NOS                |
| 34 | 62076 SB1y000  | Intercostal artery injury                                    |
| 35 | 52810 S81..11  | Ocular open wound                                            |
| 36 | 3253 SJz..00   | Nerve and spinal cord injury NOS                             |
| 37 | 12614 SD01000  | Abrasion of face, infected                                   |
| 38 | 104120 SH12A00 | Deep partial thickness burn of unspecified part of face/head |
| 39 | 99404 SJ62100  | Open injury posterior tibial nerve                           |
| 40 | 52912 S441000  | Open traumatic dislocation of finger, unspecified            |
| 41 | 104755 S113A00 | Opn spinal fracture with posterior thorac cord lesion, T7-12 |
| 42 | 21679 S440400  | Closed traumatic dislocation, proximal interphalangeal joint |
| 43 | 53976 S101200  | Open fracture axis                                           |
| 44 | 17424 N083A00  | Recurrent dislocation of shoulder - anterior                 |
| 45 | 70196 SD1z100  | Superficial injury of chest wall NOS, infected               |
| 46 | 22182 SD21200  | Abrasion of axilla, infected                                 |
| 47 | 15927 S352.00  | Closed fracture of other tarsal and metatarsal bones         |
| 48 | 73052 SJ67400  | Injury of other nerves at ankle and foot level               |
| 49 | 5320 SE33200   | Contusion, fingernail (includes subungual haematoma)         |
| 50 | 66231 S353400  | Open fracture medial cuneiform                               |
| 51 | 31797 S04..11  | Multiple face fractures                                      |

|    |                |                                                            |
|----|----------------|------------------------------------------------------------|
| 1  |                |                                                            |
| 2  | 9347 SD81100   | Superficial laceration of cornea                           |
| 3  | 3008 S646.00   | Head injury                                                |
| 4  | 67321 S420100  | Closed traumatic dislocation elbow joint, anterior         |
| 5  | 5140 TN61.00   | Injury ?accidental, by stabbing instrument                 |
| 6  | 17249 S4H..00  | Fracture-dislocation or subluxation foot                   |
| 7  | 42972 S311.00  | Open fracture of femur, shaft or unspecified part          |
| 8  | 475 S4...00    | Dislocations and subluxations                              |
| 9  | 15860 SE00.00  | Contusion, forehead                                        |
| 10 | 70485 SH33300  | Full thickness burn of the upper arm                       |
| 11 | 4954 SE21.00   | Contusion, chest wall                                      |
| 12 | 4896 SD00000   | Abrasion, face                                             |
| 13 | 4310 S352300   | Closed fracture cuboid                                     |
| 14 | 24728 SF00000  | Crush injury, cheek                                        |
| 15 | 4869 S8z..11   | Laceration NOS                                             |
| 16 | 70954 S933100  | Degloving injury, finger, multiple                         |
| 17 | 17438 S835400  | Open wound of lip with complication                        |
| 18 | 51657 S496600  | Closed traumatic dislocation costo-vertebral joint         |
| 19 | 73152 TM5z.00  | Injury due to legal intervention by other means NOS        |
| 20 | 41698 S134300  | Closed fracture pelvis, ischial tuberosity                 |
| 21 | 2888 S25..00   | Fracture of metacarpal bone                                |
| 22 | 70860 S735200  | Transverse colon injury with open wound into cavity        |
| 23 | 54145 S331200  | Open fracture of tibia and fibula, proximal                |
| 24 | 28398 SK1x500  | Multiple open wounds of abdomen, lower back and pelvis     |
| 25 | 98032 SB0y.00  | Other head and neck blood vessel injury                    |
| 26 | 35620 S342100  | Closed fracture ankle, lateral malleolus, high             |
| 27 | 70653 S221700  | Open fracture proximal humerus, four part                  |
| 28 | 4707 SH20200   | Unspecified thickness burn of the chest wall               |
| 29 | 4641 7K1T100   | Debridement of open fracture                               |
| 30 | 72525 S130000  | Closed fracture acetabulum, anterior lip alone             |
| 31 | 17535 S9...12  | Open wound of arm                                          |
| 32 | 12654 S836.00  | Open wound in mouth                                        |
| 33 | 45517 S3x..00  | Other, multiple and ill-defined fractures of lower limb    |
| 34 | 12744 S8...00  | Open wound of head, neck and trunk                         |
| 35 | 71071 S902.00  | Open wound of shoulder/upper limb with tendon involvement  |
| 36 | 105131 SH45.14 | Deep third degree burn of wrist with loss of a body part   |
| 37 | 58964 SH22600  | Superficial partial thickness burn of the genitalia        |
| 38 | 97476 S4C1300  | Open fracture-dislocation carpometacarpal joint            |
| 39 | 4379 SH20500   | Unspecified thickness burn of the buttock                  |
| 40 | 4352 SH30.00   | Unspecified thickness burn of the arm                      |
| 41 | 6743 S521.11   | Tendon injury - hand                                       |
| 42 | 65531 SB4x000  | Injury of multiple blood vessels at hip and thigh level    |
| 43 | 49840 S02y000  | Fracture of alveolus, open                                 |
| 44 | 38355 S312500  | Closed fracture distal femur, lateral condyle              |
| 45 | 49256 S4C1100  | Open fracture-dislocation radiocarpal joint                |
| 46 | 43570 S230.00  | Closed fracture of proximal radius and ulna                |
| 47 | 51189 SF1z.00  | Crush injury, trunk NOS                                    |
| 48 | 29899 S200300  | Closed fracture clavicle, lateral end                      |
| 49 | 14834 S108.00  | Closed fracture pelvis, coccyx                             |
| 50 | 29103 7K1KE00  | Primary closed reduction of fracture and external fixation |
| 51 | 106283 S023700 | Open fracture of mandible, alveolar border of body         |

|    |                |                                                              |
|----|----------------|--------------------------------------------------------------|
| 1  |                |                                                              |
| 2  | 27736 S834z00  | Open wound of face, NOS                                      |
| 3  | 62337 S110000  | Cls spinal fracture with unspec cervical cord lesion, C1-4   |
| 4  | 3888 S104.00   | Closed fracture lumbar vertebra                              |
| 5  | 24861 SB3W.00  | Injury of unspecified blood vessel at wrist & hand level     |
| 6  | 3767 SA00100   | Open wound of thigh                                          |
| 7  |                |                                                              |
| 8  | 41888 7K1G200  | Primary open reduction+external fixation of femoral fracture |
| 9  | 40304 S261K00  | Open fracture finger middle phalanx                          |
| 10 | 53622 S221100  | Open fracture proximal humerus, neck                         |
| 11 | 55737 SB20.00  | Abdominal aorta injury                                       |
| 12 |                |                                                              |
| 13 | 30204 SE32200  | Contusion hand, palm                                         |
| 14 | 67079 SD10700  | Abrasion, flank                                              |
| 15 | 32009 SR10.00  | Fractures involving head with neck                           |
| 16 | 34416 S750000  | Spleen injury without open wound into cavity, unspecified    |
| 17 | 44700 S261E00  | Open fracture finger proximal phalanx, base                  |
| 18 |                |                                                              |
| 19 | 7928 SE43.00   | Contusion, toe                                               |
| 20 | 15877 S106.00  | Closed fracture sacrum                                       |
| 21 | 12728 SA0..00  | Open wound of hip and thigh                                  |
| 22 | 17952 S23x100  | Closed fracture of radius (alone), unspecified               |
| 23 |                |                                                              |
| 24 | 5301 S302.00   | Closed fracture of proximal femur, pertrochanteric           |
| 25 | 44730 SF23400  | Open crush injury, thumb                                     |
| 26 | 3180 SA10200   | Open wound of ankle                                          |
| 27 | 73097 TN72.00  | Injury ?accidental, fall from natural site                   |
| 28 | 49936 SD21000  | Abrasion of shoulder, infected                               |
| 29 | 33768 S330600  | Closed fracture spine, tibia                                 |
| 30 |                |                                                              |
| 31 | 51773 SJ1..00  | Injury to other cranial nerves                               |
| 32 | 19243 SC30.00  | Late effect of internal chest injury                         |
| 33 | 37904 S022x00  | Closed fracture of mandible, multiple sites                  |
| 34 | 48778 S73..00  | Gastrointestinal tract injury                                |
| 35 |                |                                                              |
| 36 | 2862 S234700   | Closed Smith's fracture                                      |
| 37 | 2771 S92..00   | Open wound of hand, excluding finger(s)                      |
| 38 | 24615 S4J1200  | Open fracture-dislocation sterno-clavicular joint, anterior  |
| 39 | 104681 SB2y000 | Ovarian artery injury                                        |
| 40 | 53623 7K6Fy00  | Primary open reduction of traumatic dislocation of joint OS  |
| 41 | 40445 S4H1000  | Open fracture-dislocation, subtalar joint                    |
| 42 |                |                                                              |
| 43 | 96755 SC33.00  | Late effect of injury to blood vessel head/neck/extremities  |
| 44 | 107964 S780100 | Adrenal gland injury without mention of open wound to cavity |
| 45 | 105046 SH32x00 | Partial thickness burn of multiple sites of the arm          |
| 46 | 61389 7J42M00  | Primary cls reduc spinal fracture+skull traction stabilisatn |
| 47 | 52774 SH54400  | Deep full thickness burn of lower leg without loss of body   |
| 48 |                |                                                              |
| 49 | 34233 S450.00  | Closed traumatic dislocation of hip                          |
| 50 | 16980 SH21100  | Superficial burn of the breast                               |
| 51 | 41167 SJ12.00  | Trigeminal (5th) nerve injury                                |
| 52 | 43681 S260500  | Closed fracture thumb proximal phalanx, shaft                |
| 53 |                |                                                              |
| 54 | 35789 S4A2.00  | Closed fracture-subluxation shoulder                         |
| 55 | 27361 7J12y00  | Other specified reduction of fracture of mandible            |
| 56 | 60562 S490500  | Closed dislocation C4/C5                                     |
| 57 |                |                                                              |
| 58 | 2325 S834000   | Open wound of face, unspecified                              |
| 59 | 44943 S260H00  | Closed fracture finger proximal phalanx, head                |
| 60 | 18221 SB4..00  | Injury to blood vessels of leg                               |
|    | 3435 SD6y100   | Superficial injury thigh NOS                                 |

|    |                |                                                             |
|----|----------------|-------------------------------------------------------------|
| 1  |                |                                                             |
| 2  | 33341 SC02.00  | Late effect of fracture of arm                              |
| 3  | 97456 S913200  | Degloving injury wrist, volar                               |
| 4  | 11044 S220300  | Closed fracture proximal humerus, greater tuberosity        |
| 5  | 28518 S912000  | Open wound of forearm with tendon involvement               |
| 6  | 2131 S5yz100   | Muscle injury / strain                                      |
| 7  |                |                                                             |
| 8  | 69432 S111.00  | Open fracture of cervical spine with spinal cord lesion     |
| 9  | 66493 SJ20000  | Unspecified cervical cord injury, without bony injury, C1-4 |
| 10 | 2101 S226.00   | Fracture of upper end of humerus                            |
| 11 | 17388 S40..13  | Dislocation of temporomandibular joint                      |
| 12 | 40403 7K6FJ00  | Primary open reduction of # dislocation+wire fixation       |
| 13 | 11724 SF0..00  | Crush injury, face, scalp and neck                          |
| 14 | 73344 7J43y00  | Other specified fixation of fracture of spine               |
| 15 | 1994 S30..11   | Hip fracture                                                |
| 16 | 16553 S64..12  | Head injury NOS                                             |
| 17 |                |                                                             |
| 18 | 34356 S260N00  | Closed fracture finger middle phalanx, neck                 |
| 19 | 95622 SB22.00  | Coeliac or mesenteric artery injury                         |
| 20 | 53433 S411400  | Open traumatic dislocation acromio-clavicular joint         |
| 21 | 62899 SE30z00  | Contusion, shoulder and upper arm NOS                       |
| 22 | 7211 SF22100   | Crush injury, wrist                                         |
| 23 |                |                                                             |
| 24 | 17267 SC1..11  | Late effects of skin injury                                 |
| 25 | 1591 S130.00   | Closed fracture acetabulum                                  |
| 26 | 59619 S82wz00  | Other open wound of ear with complication NOS               |
| 27 | 54805 PF53100  | Radioulnar synostosis and dislocation of radial head        |
| 28 | 16141 7K1Gz00  | Other primary open reduction of fracture of bone NOS        |
| 29 | 21815 S450100  | Closed traumatic dislocation hip joint, posterior           |
| 30 | 56509 S641z00  | Intracranial inj NOS + open intracran wnd+concussion unspec |
| 31 | 110609 S73x200 | Pancreas body injury without open wound into cavity         |
| 32 | 10823 7K6H.00  | Secondary reduction of traumatic dislocation of joint       |
| 33 | 1435 S....00   | Injury and poisoning                                        |
| 34 | 96123 S900400  | Multiple open wounds of shoulder and upper arm              |
| 35 | 64378 S352G00  | Closed tarsal fractures, multiple                           |
| 36 | 1177 S21..00   | Fracture of scapula                                         |
| 37 | 1163 SK17300   | Other foot injury                                           |
| 38 | 1136 SF4z.11   | Crush injury                                                |
| 39 | 100555 SJ5A.00 | Intercostobrachial nerve injury                             |
| 40 | 63345 S725.00  | Injury of thoracic trachea                                  |
| 41 | 7010 SD7y000   | Superficial injury of foot NOS                              |
| 42 | 96450 SH13500  | Full thickness burn of the nose                             |
| 43 | 37734 S835500  | Open wound of jaw with complication                         |
| 44 | 33602 7K1G400  | Primary open reduction of fracture and cast immobilisation  |
| 45 | 28375 S13y.00  | Closed fracture of pelvis NOS                               |
| 46 | 50148 S4C2100  | Closed fracture-subluxation radiocarpal joint               |
| 47 | 51299 S003.00  | Open fracture vault of skull with intracranial injury       |
| 48 | 5344 S210400   | Closed fracture scapula, blade                              |
| 49 | 850 S41..00    | Dislocation or subluxation of shoulder                      |
| 50 | 73710 SJ4z.00  | Trunk nerve injury NOS                                      |
| 51 | 30390 SH41.13  | First degree burn of hand                                   |
| 52 | 49293 SB47.00  | Injury of blood vessels at lower leg level                  |
| 53 | 63978 SH14100  | Deep full thickness burn of ear without loss of body part   |
| 54 | 51150 SD2y100  | Superficial injury of scapular NOS                          |
| 55 |                |                                                             |
| 56 |                |                                                             |
| 57 |                |                                                             |
| 58 |                |                                                             |
| 59 |                |                                                             |
| 60 |                |                                                             |

|    |                |                                                               |
|----|----------------|---------------------------------------------------------------|
| 1  |                |                                                               |
| 2  | 1479 S46..00   | Dislocation or subluxation of knee                            |
| 3  | 99459 S261P00  | Open fracture finger middle phalanx, head                     |
| 4  | 68556 S201300  | Open fracture clavicle, lateral end                           |
| 5  | 92043 S4H1200  | Open fracture-dislocation, tarsometatarsal joint              |
| 6  | 46277 SK18.00  | Injury of muscle and tendon of head                           |
| 7  | 62045 S760.00  | Closed injury of kidney                                       |
| 8  | 36497 7K1Jz00  | Closed reduction of bone fracture and internal fixation NOS   |
| 9  | 27998 SJ56500  | Open injury, digital nerve, multiple                          |
| 10 | 40419 SH10200  | Unspecified thickness burn of the eye                         |
| 11 | 54185 SB45.00  | Tibial blood vessel injury                                    |
| 12 | 93752 7J42y00  | Other specified other reduction of fracture of spine          |
| 13 | 50409 SA12200  | Open wound of ankle with tendon involvement                   |
| 14 | 517 S22..00    | Fracture of humerus                                           |
| 15 | 37297 7J12z00  | Reduction of fracture of mandible NOS                         |
| 16 | 30186 7403600  | Outfracture of turbinates of nose                             |
| 17 | 482 S26..12    | Thumb fracture excluding base                                 |
| 18 | 99565 S732100  | Duodenum injury without mention of open wound into cavity     |
| 19 | 441 S26..00    | Fracture of one or more phalanges of hand                     |
| 20 | 71359 SJ52500  | Open injury, ulnar nerve, dorsal sensory                      |
| 21 | 36556 S261000  | Open fracture of phalanx or phalanges, unspecified            |
| 22 | 48903 S463100  | Closed traumatic dislocation patello-femoral joint, medial    |
| 23 | 8648 S302400   | Closed fracture of femur, intertrochanteric                   |
| 24 | 64021 S211200  | Open fracture scapula, coracoid                               |
| 25 | 47645 S938.00  | Open wound of thumb with damage to nail                       |
| 26 | 357 SH10000    | Unspecified thickness burn of unspecified part of face/head   |
| 27 | 10102 7K1Ky00  | Closed reduction of bone fracture and external fixation OS    |
| 28 | 36686 SH30600  | Unspecified thickness burn of the scapular region             |
| 29 | 103049 SR15000 | Cl fractures involving multiple regions upper with lower limb |
| 30 | 55280 S109.00  | Open fracture pelvis, coccyx                                  |
| 31 | 45742 SJ43.00  | Lateral cutaneous branch T12 injury                           |
| 32 | 65988 S894400  | Open wound of flank without complication                      |
| 33 | 4304 S33x100   | Closed fracture of fibula, unspecified part, NOS              |
| 34 | 50492 SH11z00  | Superficial burn of the face, head or neck NOS                |
| 35 | 45314 S912.00  | Open wound of lower arm with tendon involvement               |
| 36 | 34835 SJ2..00  | Spinal cord injury without evidence of spinal bone injury     |
| 37 | 48586 SD0zz00  | Superficial injury of head NOS, infection NOS                 |
| 38 | 54189 S496500  | Closed traumatic dislocation laryngeal cartilage              |
| 39 | 56373 SD11B12  | Abrasion or friction burn of testis, infected                 |
| 40 | 11296 S100.00  | Closed fracture of cervical spine                             |
| 41 | 197 S8z..13    | Laceration                                                    |
| 42 | 19174 SF21000  | Crush injury, forearm                                         |
| 43 | 137 S23x111    | Fracture of radius NOS                                        |
| 44 | 36698 7K1Dz00  | Prim open reduction fracture bone & intramedull fixation NOS  |
| 45 | 110200 S465500 | Closed traumatic dislocation knee joint, rotatory             |
| 46 | 60382 S101311  | C3 vertebra open fracture without spinal cord lesion          |
| 47 | 55740 SH22100  | Superficial partial thickness burn of the breast              |
| 48 | 16020 S48..00  | Dislocation or subluxation of foot                            |
| 49 | 17961 7K6G400  | Closed reduction of dislocation of elbow                      |
| 50 | 36328 S23xz00  | Closed fracture of radius and ulna, NOS                       |
| 51 | 25889 SJ56.00  | Digital nerve injury                                          |



|    |                |                                                             |
|----|----------------|-------------------------------------------------------------|
| 1  |                |                                                             |
| 2  | 31331 S494000  | Closed dislocation of spine, unspecified                    |
| 3  | 39859 S04..12  | Multiple skull fractures                                    |
| 4  | 28260 S8z..00  | Open wound of head, neck and trunk NOS                      |
| 5  | 10385 S8...11  | Laceration of head, neck and trunk                          |
| 6  | 28299 S8A..00  | Open wounds involving head with neck                        |
| 7  | 28307 S200200  | Closed fracture clavicle, shaft                             |
| 8  | 24050 SD31200  | Abrasion of wrist, infected                                 |
| 9  | 60608 S140.00  | Closed fracture of ill-defined bone of trunk                |
| 10 | 100677 N331.13 | Sponaneous fracture                                         |
| 11 | 48217 S225600  | Open fracture distal humerus, lateral epicondyle            |
| 12 | 70981 S837000  | Open wound in mouth with complication, unspecified          |
| 13 | 89260 S84y.00  | Other open wound of neck with complication                  |
| 14 | 50473 SH11900  | Superficial burn of the neck                                |
| 15 | 58957 S010100  | Closed #skull bse no intracranial injury, no loss of consc  |
| 16 | 40260 F4K3200  | Anterior dislocation of lens                                |
| 17 | 40267 S4E0.00  | Closed fracture-dislocation, hip joint                      |
| 18 | 107337 S647.00 | Acquired brain injury                                       |
| 19 | 36120 S40..11  | Dislocation of mandible                                     |
| 20 | 40294 S832000  | Open wound of nose, unspecified                             |
| 21 | 47917 SC03.00  | Late effect of fracture neck of femur                       |
| 22 | 99161 S331900  | Open fracture fibula, neck                                  |
| 23 | 65297 S4J3100  | Open fracture-subluxation of pelvis                         |
| 24 | 37686 S01..18  | Sphenoid bone fracture                                      |
| 25 | 99904 S741100  | Liver haematoma and contusion with open wound into cavity   |
| 26 | 40351 SH11700  | Superficial burn of the forehead                            |
| 27 | 65302 S105100  | Open fracture lumbar vertebra, wedge                        |
| 28 | 21344 SJ5..11  | Arm peripheral nerve injury                                 |
| 29 | 40362 S496300  | Closed traumatic dislocation, sterno-clavicular joint, ant  |
| 30 | 62413 SH52800  | Deep partial thickness burn of the toe(s)                   |
| 31 | 54553 S023x00  | Open fracture of mandible, multiple sites                   |
| 32 | 70481 S835x00  | Multiple open wounds of face with complication              |
| 33 | 40374 S465400  | Closed traumatic dislocation knee joint, lateral            |
| 34 | 98776 S001200  | Closed #skull vlt + intracranial injury, <1hr loss of consc |
| 35 | 72045 S77z.00  | Pelvic organ injury NOS                                     |
| 36 | 110204 TN3z.00 | Injury ?accidental, hanging/strangulation/suffocation NOS   |
| 37 | 18394 S224200  | Closed fracture distal humerus, lateral condyle             |
| 38 | 4849 N338000   | Malunion of fracture                                        |
| 39 | 37310 S3z0.00  | Closed fracture of bones, unspecified                       |
| 40 | 33656 S330100  | Closed fracture proximal fibula                             |
| 41 | 28741 S23y200  | Open fracture of ulna (alone), unspecified                  |
| 42 | 40485 SH41300  | Superficial burn of more than one finger                    |
| 43 | 37495 SE22z00  | Contusion, abdominal wall NOS                               |
| 44 | 52936 SD2z200  | Superficial injury of axilla NOS, infected                  |
| 45 | 62666 7K6HF00  | Revision to open reduction of dislocation alone             |
| 46 | 73986 S4D3.00  | Open fracture-subluxation digit                             |
| 47 | 66114 S002000  | Open #skull vlt no intracranial injury, unspec state consc  |
| 48 | 94393 S251x00  | Open fractures of multiple sites of unspecified metacarpus  |
| 49 | 20117 SE08.00  | Other contusion neck                                        |
| 50 | 47851 SH51400  | Superficial burn of the lower leg                           |
| 51 | 61279 S261300  | Open fracture thumb proximal phalanx                        |

|    |                |                                                              |
|----|----------------|--------------------------------------------------------------|
| 1  |                |                                                              |
| 2  | 17383 SC13.11  | Late effect of bruising                                      |
| 3  | 953 S3z1.00    | Open fracture of bones, unspecified                          |
| 4  | 98289 SJ33400  | Sacral nerve root injury - S5                                |
| 5  | 48941 SH84.00  | Burn involving 40-49% of body surface (BS)                   |
| 6  | 99295 SH55.00  | Deep full thickness burn of leg, with loss of body part      |
| 7  | 52545 SJ66X00  | Injury of unspecified nerve at lower leg level               |
| 8  | 22329 S312.11  | Closed fracture of femur, distal end                         |
| 9  | 52672 S523D00  | Volar plate injury, thumb, metacarpophalangeal joint         |
| 10 | 44949 S02B.00  | Le Fort II fracture maxilla                                  |
| 11 | 40752 S4J..00  | Other fracture-dislocation or subluxation                    |
| 12 | 57299 S710.00  | Heart injury, closed                                         |
| 13 | 40786 SJ50.00  | Axillary nerve injury                                        |
| 14 | 40817 S4D2400  | Closed fracture-subluxation, proximal interphalangeal joint  |
| 15 | 94061 SD10000  | Abrasion, interscapular                                      |
| 16 | 91794 SA02100  | Open wound of thigh with tendon involvement                  |
| 17 | 34685 S133000  | Open fracture pelvis, single pubic ramus                     |
| 18 | 32407 S910400  | Open wound of wrist, dorsal                                  |
| 19 | 71080 S723.00  | Open injury other intra-thoracic structure                   |
| 20 | 50131 SF22200  | Closed crush injury wrist, dorsum                            |
| 21 | 57883 SC18.00  | Late effect of other burns                                   |
| 22 | 41241 TKz..00  | Suicide and selfinflicted injury NOS                         |
| 23 | 7564 S242100   | Fracture of first metacarpal bone                            |
| 24 | 5311 SJ42.00   | Intercostal nerve injury                                     |
| 25 | 27620 S210.00  | Closed fracture of scapula                                   |
| 26 | 17036 8HB9.00  | Fracture therapy follow-up                                   |
| 27 | 11815 SA3..11  | Open wound of toenail                                        |
| 28 | 60171 SJ53200  | Open injury, radial nerve                                    |
| 29 | 41706 SD50100  | Abrasion, thumb                                              |
| 30 | 22393 7K1JH00  | Primary wire fixation of fracture                            |
| 31 | 104070 S235C00 | Open fracture distal radius, intra-articular, die-punch      |
| 32 | 52353 SH31z00  | Superficial burn of the arm NOS                              |
| 33 | 52346 S346100  | Closed fracture ankle, trimalleolar, high fibular fracture   |
| 34 | 7159 S363.00   | Fracture of other toe                                        |
| 35 | 37582 S4D1400  | Open fracture-dislocation, proximal interphalangeal joint    |
| 36 | 10167 S24..11  | Hand fracture - carpal bone                                  |
| 37 | 41720 SD01.11  | Abrasion or friction burn of head, infected                  |
| 38 | 41753 S49..00  | Other, multiple and ill-defined dislocations or subluxations |
| 39 | 30363 7L0G000  | Open reduction of congenital dislocation of hip              |
| 40 | 94573 SJ56000  | Closed injury, common digital nerve                          |
| 41 | 96569 S481A00  | Open traumatic dislocation, subtalar joint                   |
| 42 | 97289 S421y00  | Other open traumatic dislocation of elbow                    |
| 43 | 27602 S932.11  | Open wound of finger with tendon injury                      |
| 44 | 2660 S28z.00   | Ill-defined fractures of upper limb NOS                      |
| 45 | 17524 S831.00  | Open wound of scalp with complication                        |
| 46 | 60556 SF20400  | Closed crush injury, shoulder area                           |
| 47 | 41906 SD0y.00  | Superficial injury of head NOS                               |
| 48 | 41907 SA20300  | Open wound, heel                                             |
| 49 | 71824 SJ59000  | Closed injury, long thoracic nerve                           |
| 50 | 73479 S130200  | Closed fracture acetabulum, anterior column                  |
| 51 | 31766 S464.00  | Open traumatic dislocation of patello-femoral joint          |



|    |                |                                                              |
|----|----------------|--------------------------------------------------------------|
| 1  |                |                                                              |
| 2  | 55102 SF3z.00  | Crush injury, lower limb NOS                                 |
| 3  | 42867 SB4X.00  | Injury of unspecified blood vessel at hip & thigh level      |
| 4  | 70795 SJ52300  | Closed injury, ulnar nerve, deep motor                       |
| 5  | 12767 SD51.00  | Abrasion or friction burn of finger, infected                |
| 6  |                |                                                              |
| 7  | 55644 SH12111  | Ear - 2nd degree burn                                        |
| 8  | 34195 S134800  | Closed fracture dislocation of sacro-iliac joint             |
| 9  | 60627 S615.00  | Open hindbrain contusion                                     |
| 10 | 28196 SJ31.11  | Dorsal nerve root injury                                     |
| 11 | 28149 7K6G000  | Primary closed reduction # dislocation jnt+skeletal traction |
| 12 |                |                                                              |
| 13 | 2887 7K1L100   | Manipulation of fracture of bone NEC                         |
| 14 | 1548 S228.00   | Fracture of lower end of humerus                             |
| 15 | 42186 7K1Jy00  | Closed reduction of bone fracture and internal fixation OS   |
| 16 | 21040 SH42.00  | Partial thickness burn of the wrist and hand                 |
| 17 | 10735 S21..11  | Shoulder blade fracture                                      |
| 18 |                |                                                              |
| 19 | 52650 TG80D00  | Accidental burning or scalding by steam from car radiator    |
| 20 | 520 S31z.00    | Fracture of femur, NOS                                       |
| 21 | 69362 7K6H411  | Remanipulation of fracture dislocation alone                 |
| 22 | 20249 SH93.00  | Full thickness burn NOS                                      |
| 23 |                |                                                              |
| 24 | 42430 SC15.11  | Late effect of burn of head or neck                          |
| 25 | 2215 SH90.00   | Unspecified degree of burn NOS                               |
| 26 | 37986 S261800  | Open fracture thumb distal phalanx                           |
| 27 | 70883 SJ1y.00  | Other specified cranial nerve injury                         |
| 28 | 56998 SH43300  | Full thickness burn of more than one finger                  |
| 29 | 28118 S333000  | Open fracture shaft of tibia                                 |
| 30 |                |                                                              |
| 31 | 65769 S833300  | Open wound of nasal sinus with complication                  |
| 32 | 60804 SH30x00  | Unspecified thickness burn of multiple sites of the arm      |
| 33 | 64777 S131z00  | Open fracture acetabulum NOS                                 |
| 34 | 42937 TK71.00  | Suicide+selfinflicted injury-jump from oth manmade structure |
| 35 | 63985 TD15.00  | Burning caused by conflagration in other structure/building  |
| 36 |                |                                                              |
| 37 | 17057 SF31100  | Crush injury, knee                                           |
| 38 | 9174 S3x4.00   | Multiple fractures of foot                                   |
| 39 | 12113 SD20300  | Abrasion, upper arm                                          |
| 40 | 12689 S44..11  | Dislocation of thumb                                         |
| 41 | 58831 TN80.00  | Injury ?accidental, by jumping or lying before moving object |
| 42 | 42902 S4H1400  | Open fracture-dislocation, IPJ, single toe                   |
| 43 | 10933 SD6y000  | Superficial injury of hip NOS                                |
| 44 |                |                                                              |
| 45 | 27558 7K6G500  | Closed reduction of dislocation of wrist                     |
| 46 | 6667 S132100   | Closed fracture pelvis, multiple pubic rami - stable         |
| 47 | 42957 S230z00  | Closed fracture of proximal forearm not otherwise specified  |
| 48 |                |                                                              |
| 49 | 103264 SA23000 | Degloving injury foot, plantar                               |
| 50 | 60535 N083.11  | Redislocation of joint                                       |
| 51 | 42968 S104000  | Closed fracture lumbar vertebra, burst                       |
| 52 | 66292 S490000  | Closed dislocation of cervical spine, unspecified            |
| 53 |                |                                                              |
| 54 | 6446 SA3..00   | Open wound of toe(s)                                         |
| 55 | 12502 S836200  | Open wound of gum                                            |
| 56 | 36772 S023.11  | Fracture of lower jaw, open                                  |
| 57 | 14906 SE22.00  | Contusion, abdominal wall                                    |
| 58 | 909 S23z.00    | Fracture of radius and ulna, NOS                             |
| 59 | 44059 S114.00  | Closed fracture of lumbar spine with spinal cord lesion      |
| 60 | 99957 SJ6x.00  | Other pelvic girdle and lower limb peripheral nerve injury   |

|    |                |                                                              |
|----|----------------|--------------------------------------------------------------|
| 1  |                |                                                              |
| 2  | 29091 S022000  | Closed fracture mandible (site unspecified)                  |
| 3  | 43342 S837200  | Open wound of gum with complication                          |
| 4  | 43596 S421000  | Open traumatic dislocation of elbow, unspecified             |
| 5  | 43418 S624.11  | Epidural haematoma following injury                          |
| 6  | 44844 S234C00  | Closed fracture distal radius, intra-articular, die-punch    |
| 7  | 44826 S121200  | Open fracture of two ribs                                    |
| 8  | 7576 SD...15   | Friction burns                                               |
| 9  | 43355 TN85.00  | Injury ?accidental, by crashing of motor vehicle             |
| 10 | 72392 SJ41z00  | Sympathetic nerve injury NOS                                 |
| 11 | 65493 7G2C500  | Tangent excision of burnt skin of head or neck               |
| 12 | 63071 S4D2500  | Closed fracture-subluxation, interphalangeal joint thumb     |
| 13 | 9917 S347.00   | Open fracture ankle, trimalleolar                            |
| 14 | 94236 S4J1000  | Open fracture-dislocation of sternum                         |
| 15 | 106186 SB1y500 | Hemiazzygos vein injury                                      |
| 16 | 17921 S4C2.00  | Closed fracture-subluxation of the wrist                     |
| 17 | 43730 7J03300  | Reduction of closed fracture of orbit bone                   |
| 18 | 43735 SH41200  | Superficial burn of the thumb                                |
| 19 | 43741 SJ10.11  | Third cranial nerve injury                                   |
| 20 | 8255 S10..00   | Fracture of spine without mention of spinal cord injury      |
| 21 | 44841 SH43400  | Full thickness burn of the thumb and finger(s)               |
| 22 | 67011 S261x00  | Open fracture of phalanx or phalanges, multiple sites        |
| 23 | 37662 S310000  | Closed fracture of femur, unspecified part                   |
| 24 | 21248 SJ51.00  | Median nerve injury                                          |
| 25 | 97120 S101211  | C2 vertebra open fracture without spinal cord lesion         |
| 26 | 46456 TKx1.00  | Suicide and selfinflicted injury by burns or fire            |
| 27 | 103279 SH24000 | Deep full thickness burn of trunk unsp, no loss of body part |
| 28 | 48739 S933300  | Ring avulsion injury, class 2                                |
| 29 | 44156 S241400  | Open fracture pisiform                                       |
| 30 | 44226 S86z.00  | Open wound of back NOS                                       |
| 31 | 44276 S331300  | Open fracture proximal tibia, medial condyle (plateau)       |
| 32 | 34351 S300600  | Closed fracture proximal femur, subcapital, Garden grade I   |
| 33 | 106986 S710300 | Heart laceration, closed with penetration of heart chamber   |
| 34 | 71454 TN0z.00  | Injury ?accidental, poisoning by solid or liquid subst NOS   |
| 35 | 106486 S620z00 | Subarach h'ge inj no open intracran wnd + concussion unspec  |
| 36 | 69933 SC44000  | Sequelae of burn, corrosion and frostbite of trunk           |
| 37 | 4737 S34x.00   | Closed fracture ankle, unspecified                           |
| 38 | 54198 7K6H200  | Secondary open reduction fracture dislocation of joint NEC   |
| 39 | 66774 S235z00  | Open fracture of forearm, lower end, NOS                     |
| 40 | 51946 S4D3300  | Open fracture-subluxation, distal interphalangeal joint      |
| 41 | 68428 SJ7y.00  | Multiple nerve injury NOS                                    |
| 42 | 44522 SE40.00  | Contusion, hip and thigh                                     |
| 43 | 51700 S261U00  | Open fracture finger distal phalanx, tuft                    |
| 44 | 23080 TK3..00  | Suicide + selfinflicted injury by hang/strangulate/suffocate |
| 45 | 28841 SH33100  | Full thickness burn of the forearm                           |
| 46 | 63679 S011.00  | Closed fracture base of skull with intracranial injury       |
| 47 | 73234 S301y11  | Open fracture of femur, subcapital                           |
| 48 | 42121 SE41.00  | Contusion, knee and lower leg                                |
| 49 | 33845 S260U00  | Closed fracture finger distal phalanx, tuft                  |
| 50 | 42502 SC01.00  | Late effect of fracture of spine/trunk without cord lesion   |
| 51 | 47478 S280.00  | Closed ill-defined fractures of upper limb                   |

|    |                |                                                              |
|----|----------------|--------------------------------------------------------------|
| 1  |                |                                                              |
| 2  | 47274 T032.00  | Train accident involving burning                             |
| 3  | 71282 S303200  | Open fracture proximal femur, subtrochanteric                |
| 4  | 106473 SF32500 | Open crush injury, ankle                                     |
| 5  | 44652 S4C2000  | Closed fracture-subluxation, distal radio-ulnar jt           |
| 6  | 52083 S224500  | Closed fracture of distal humerus, trochlea                  |
| 7  | 55627 S101.00  | Open fracture of cervical spine                              |
| 8  | 64222 7K1Kz00  | Closed reduction of bone fracture and external fixation NOS  |
| 9  | 27854 S134600  | Closed fracture pelvis, iliac wing                           |
| 10 | 98600 S780200  | Bile duct/gallbladder injury without open wound into cavity  |
| 11 | 55939 S353700  | Open fracture metatarsal                                     |
| 12 | 27567 S352C00  | Closed fracture metatarsal shaft                             |
| 13 | 3555 SE05.00   | Contusion, ear                                               |
| 14 | 6320 S312100   | Closed fracture of femoral condyle, unspecified              |
| 15 | 64112 S80y.00  | Other open ocular adnexa wound                               |
| 16 | 44737 S260J00  | Closed fracture finger proximal phalanx, multiple            |
| 17 | 21816 SH11000  | Superficial burn of unspecified part of the face or head     |
| 18 | 4860 SA...12   | Laceration - leg                                             |
| 19 | 100158 7K6GS00 | Primary closed reduction of dislocation and skin traction    |
| 20 | 99364 S741200  | Liver minor laceration with open wound into cavity           |
| 21 | 34429 S4C0.00  | Closed fracture dislocation of wrist                         |
| 22 | 57405 SH54200  | Deep full thickness burn of foot without loss of body part   |
| 23 | 53348 7K1Fy00  | Primary open reduction of intraarticular fracture bone OS    |
| 24 | 101109 S451z00 | Open traumatic dislocation of hip not otherwise specified    |
| 25 | 44868 SH41.00  | Superficial burn of the wrist and hand                       |
| 26 | 34371 S230400  | Closed fracture of proximal ulna, comminuted                 |
| 27 | 70282 S025.11  | Fracture of upper jaw, open                                  |
| 28 | 94450 S010200  | Closed #skull bse no intracranial injury, <1hr loss of consc |
| 29 | 16522 SAz..00  | Open wound of lower limb NOS                                 |
| 30 | 65273 SJ30000  | Cervical nerve root injury - C1                              |
| 31 | 45094 S260W00  | Closed fracture finger distal phalanx, multiple              |
| 32 | 2461 S01..00   | Fracture of base of skull                                    |
| 33 | 104988 SD1zz00 | Superficial injury of trunk NOS, infection NOS               |
| 34 | 39708 S4D0200  | Closed fracture-dislocation IPJ, unspecified                 |
| 35 | 40325 SH51.00  | Superficial burn of the leg                                  |
| 36 | 39666 S722100  | Closed injury of oesophagus                                  |
| 37 | 39458 S240900  | Closed fracture hamate, hook                                 |
| 38 | 66916 S923100  | Degloving injury hand, dorsum                                |
| 39 | 56327 S721.00  | Open injury of diaphragm                                     |
| 40 | 39396 S303400  | Open fracture of femur, intertrochanteric                    |
| 41 | 107741 S234A12 | Closed dorsal Barton fracture-subluxation                    |
| 42 | 39376 S837400  | Open wound of tongue with complication                       |
| 43 | 105406 SJ22100 | Complete lumbar cord injury without bony injury              |
| 44 | 62960 S4B0100  | Closed fracture-dislocation superior radio-ulnar joint       |
| 45 | 70436 S732.00  | Small intestine injury without open wound into cavity        |
| 46 | 39289 S430300  | Closed traumatic dislocation mid carpal joint                |
| 47 | 105816 S345100 | Open fracture ankle, bimalleolar, high fibular fracture      |
| 48 | 88998 SH12311  | Lip - 2nd degree burn                                        |
| 49 | 12607 SD70.00  | Abrasion/friction burn of foot and toe, without infection    |
| 50 | 92830 SR12000  | Closed fractures involving multiple regions of one upp limb  |
| 51 | 49870 7K1G000  | Prmy open reduction of fracture and skeletal traction        |

|    |                |                                                              |
|----|----------------|--------------------------------------------------------------|
| 1  |                |                                                              |
| 2  | 738 S13..00    | Fracture or disruption of pelvis                             |
| 3  | 43337 SF4..00  | Crush injury, multiple and unspecified sites                 |
| 4  | 38855 SH31400  | Superficial burn of the axilla                               |
| 5  | 32830 SC1A.00  | Late effect of burn of upper limb                            |
| 6  | 69638 S89vz00  | Other and unspecified open wound of trunk, NOS               |
| 7  | 38767 SD81.00  | Superficial injury of cornea                                 |
| 8  |                |                                                              |
| 9  | 109564 SH12J00 | Deep partial thickness burn of the cheek                     |
| 10 | 68671 SH40x00  | Unspecified thickness burn of multiple sites of wrist/hand   |
| 11 | 42561 S100111  | C1 vertebra closed fracture - no spinal cord lesion          |
| 12 |                |                                                              |
| 13 | 33666 S4F2.00  | Closed fracture-subluxation, knee joint                      |
| 14 | 39401 SD1yB00  | Superficial injury scrotum+testis NOS without mj open wound  |
| 15 | 48723 S7B..00  | Injury of intra-abdominal organ(s) with pelvic organ(s)      |
| 16 | 28240 SH10400  | Unspecified thickness burn of the chin                       |
| 17 | 56883 SH82z00  | Burn: 20-29% of body surface NOS                             |
| 18 | 44597 SE42.00  | Contusion, ankle and foot, excluding toe(s)                  |
| 19 |                |                                                              |
| 20 | 45567 S726.00  | Injury of pleura                                             |
| 21 | 66925 S89wz00  | Other and unspecified open wound trunk with complication NOS |
| 22 | 38433 7K1L900  | Closed reduction of fracture of metatarsus                   |
| 23 |                |                                                              |
| 24 | 53423 SR12.00  | Fractures involving multiple regions of one upper limb       |
| 25 | 59175 SB45300  | Posterior tibial artery injury, unspecified                  |
| 26 | 49598 S250B00  | Closed fracture thumb metacarpal neck                        |
| 27 | 90950 SF21500  | Open crush injury, elbow area                                |
| 28 | 52588 S251400  | Open fracture finger metacarpal neck                         |
| 29 |                |                                                              |
| 30 | 7531 S252.00   | Closed fracture sesamoid bone of hand                        |
| 31 | 28338 SD11900  | Abrasion of perineum, infected                               |
| 32 | 26324 S232.00  | Closed fracture of radius and ulna, shaft                    |
| 33 | 38308 S492000  | Closed dislocation lumbar spine                              |
| 34 | 52333 S261T00  | Open fracture finger distal phalanx, shaft                   |
| 35 |                |                                                              |
| 36 | 6286 S340.00   | Closed fracture ankle, medial malleolus                      |
| 37 | 38079 TN54.00  | Injury ?accidental, by other firearm                         |
| 38 | 38070 SB40.00  | Common femoral artery injury                                 |
| 39 | 49644 S024z00  | Fracture of malar or maxillary bones, closed, NOS            |
| 40 | 105612 S353E00 | Open fracture metatarsal head                                |
| 41 | 38050 S023.00  | Fracture of mandible, open                                   |
| 42 |                |                                                              |
| 43 | 38047 TG80700  | Accidental burning or scalding caused by coffee              |
| 44 | 61529 S261H00  | Open fracture finger proximal phalanx, head                  |
| 45 | 95617 TG80y00  | Accidental burning or scalding caused by other hot vapour    |
| 46 | 59996 S101711  | C7 vertebra open fracture without spinal cord lesion         |
| 47 |                |                                                              |
| 48 | 12796 SE23z00  | Contusion, back NOS                                          |
| 49 | 36304 S352H00  | Closed fracture of cuneiforms                                |
| 50 | 12179 S022100  | Closed fracture of mandible, condylar process                |
| 51 | 73940 SB30z00  | Axillary blood vessel injury NOS                             |
| 52 | 59219 S4C3.00  | Open fracture-subluxation of the wrist                       |
| 53 |                |                                                              |
| 54 | 44283 SH80z00  | Burn:<10% of body surface NOS                                |
| 55 | 55559 S82vz00  | Other open wound of ear NOS                                  |
| 56 | 61239 S603.00  | Concussion with >24 hrs loss of consc with full recovery     |
| 57 | 494 SE1z.11    | Eye injury                                                   |
| 58 | 18614 S4C..00  | Fracture-dislocation or subluxation of wrist                 |
| 59 | 100181 S490x00 | Closed dislocation of multiple cervical vertebrae            |
| 60 | 3937 S352700   | Closed fracture metatarsal                                   |

|    |                |                                                              |
|----|----------------|--------------------------------------------------------------|
| 1  |                |                                                              |
| 2  | 69394 S493.00  | Open dislocation of thoracic and lumbar spine                |
| 3  | 36395 SE07.00  | Contusion, throat                                            |
| 4  | 8537 SD6y.00   | Superficial injury of lower limb NOS, without infection      |
| 5  | 70133 S492.11  | Closed dislocation of thoracic and lumbar vertebra           |
| 6  | 25445 S4D0100  | Closed fracture-dislocation, metacarpophalangeal joint       |
| 7  | 67603 S033.00  | Open fracture of skull NOS with intracranial injury          |
| 8  | 10619 SD30100  | Abrasion, forearm area                                       |
| 9  | 56073 SD3z200  | Superficial injury of wrist NOS, infected                    |
| 10 | 35253 S33x.11  | Lower leg fracture NOS                                       |
| 11 | 25138 S910000  | Open wound of forearm                                        |
| 12 | 37467 N083I00  | Recurrent dislocation of the hip                             |
| 13 | 37460 SD1y700  | Superficial injury of flank NOS, without major open wound    |
| 14 | 17978 SE01.00  | Contusion, cheek                                             |
| 15 | 68243 S836500  | Open wound of mouth floor                                    |
| 16 | 37439 S737.00  | Injury of small intestine                                    |
| 17 | 11658 7K6G.00  | Primary closed reduction of traumatic dislocation of joint   |
| 18 | 54660 S320300  | Closed fracture patella, vertical                            |
| 19 | 73656 SH54000  | Deep full thickness burn of leg unsp, no loss of body part   |
| 20 | 20489 SC06.00  | Late effect of dislocation                                   |
| 21 | 18758 7K6GE00  | Closed reduction of dislocation of toe                       |
| 22 | 73105 S343100  | Open fracture ankle, lateral malleolus, high                 |
| 23 | 94442 TK01400  | Suicide and self inflicted injury by Phenobarbitone          |
| 24 | 22220 SJ34.00  | Brachial plexus injury                                       |
| 25 | 24825 SF10200  | Crush injury, vulva                                          |
| 26 | 104950 SH44.13 | Deep third degree burn of thumb, without loss of a body part |
| 27 | 63242 S14..00  | Fracture of ill-defined bones of trunk                       |
| 28 | 37116 SH70100  | Burn of the gum                                              |
| 29 | 34993 S4J0.00  | Other closed fracture-dislocation                            |
| 30 | 50270 SR1z.00  | Multiple fractures, unspecified                              |
| 31 | 49140 SJ32000  | Lumbar nerve root injury - L1                                |
| 32 | 32400 TG80300  | Accidental burning or scalding caused by steam               |
| 33 | 44548 SD20000  | Abrasion, shoulder area                                      |
| 34 | 70479 S303z00  | Open fracture of proximal femur, pertrochanteric, NOS        |
| 35 | 11804 SK14.11  | Tendon injury to hand NOS                                    |
| 36 | 27657 S001.00  | Closed fracture vault of skull with intracranial injury      |
| 37 | 63800 TN0..00  | Injury ?accidental, poisoning by solid/liquid substances     |
| 38 | 58616 SB4z.00  | Leg blood vessel injury NOS                                  |
| 39 | 59904 S130y00  | Other specified closed fracture acetabulum                   |
| 40 | 94352 SF31z00  | Crush injury, knee and lower leg NOS                         |
| 41 | 29517 SJ64.00  | Cutaneous sensory nerve of lower limb injury                 |
| 42 | 64595 SJ41100  | Coeliac plexus injury                                        |
| 43 | 36599 S300800  | Closed fracture proximal femur, subcapital, Garden grade III |
| 44 | 60633 S023100  | Open fracture of mandible, condylar process                  |
| 45 | 66411 S84x000  | Open wound of neck nape                                      |
| 46 | 73702 SA00z00  | Open wound hip and thigh, NOS                                |
| 47 | 8968 S120A00   | Cough fracture                                               |
| 48 | 31136 SH40200  | Unspecified thickness burn of the thumb                      |
| 49 | 42960 7K6FM00  | Primary open reduction of # dislocation+fixation+screw(s)    |
| 50 | 54766 SH43600  | Full thickness burn of the back of hand                      |
| 51 | 62648 SC3C300  | Seq of crushing injury+traumatic amputation of upper limb    |



|    |                |                                                              |
|----|----------------|--------------------------------------------------------------|
| 1  |                |                                                              |
| 2  | 36440 SH30200  | Unspecified thickness burn of the elbow                      |
| 3  | 34277 7K1Dy00  | Prim open reduction fracture bone & intramedullary fixatn OS |
| 4  | 69974 S100900  | Closed fracture atlas, comminuted                            |
| 5  | 47868 7K6F500  | Primary open reduction of dislocation alone                  |
| 6  | 44830 S330.00  | Closed fracture of tibia and fibula, proximal                |
| 7  |                |                                                              |
| 8  | 4725 S242300   | Multiple fractures of metacarpal bones                       |
| 9  | 2225 S30..00   | Fracture of neck of femur                                    |
| 10 | 42283 S63z.00  | Other cerebral haemorrhage following injury NOS              |
| 11 | 25274 TNz..00  | Injury undetermined accidental or purposely inflicted NOS    |
| 12 |                |                                                              |
| 13 | 39112 S902.11  | Open wound of arm with tendon injury                         |
| 14 | 42876 SH24400  | Deep full thickness burn of back without loss of body part   |
| 15 | 48176 SH53200  | Full thickness burn of the foot                              |
| 16 | 3423 TK...12   | Injury - self-inflicted                                      |
| 17 | 30748 7K1JJ00  | Revision to wire fixation of fracture                        |
| 18 | 36253 SB0..11  | Injury to blood vessel of neck                               |
| 19 | 69705 SJ56300  | Open injury, common digital nerve                            |
| 20 | 24210 S80..11  | Open wound of eyelid                                         |
| 21 |                |                                                              |
| 22 | 36159 SH52600  | Superficial partial thickness burn of the thigh              |
| 23 | 553 S242000    | Fracture of scaphoid                                         |
| 24 |                |                                                              |
| 25 | 16226 63CB.00  | Risk of non-accidental injury                                |
| 26 | 102159 SF22600 | Open crush injury wrist, dorsum                              |
| 27 | 101299 S113000 | Opn spinal fracture with unspec thoracic cord lesion, T1-6   |
| 28 | 15166 S350.12  | Os calcis fracture                                           |
| 29 | 8845 SE3..11   | Arm bruise                                                   |
| 30 |                |                                                              |
| 31 | 39758 S353100  | Open fracture of talus                                       |
| 32 | 4724 S79..00   | Internal injury NOS                                          |
| 33 | 42952 S441.00  | Open traumatic dislocation digit                             |
| 34 | 37456 SH21600  | Superficial burn of the genitalia                            |
| 35 | 61258 SE30200  | Contusion, axillary area                                     |
| 36 |                |                                                              |
| 37 | 21372 SK1FX00  | Injury of unspecified muscle & tendon of ankle and foot      |
| 38 | 35867 S630.12  | Intracranial haematoma following injury                      |
| 39 | 57058 SH32300  | Superficial partial thickness burn of the upper arm          |
| 40 | 34738 S313500  | Open fracture distal femur, lateral condyle                  |
| 41 | 73339 SA4z.00  | Multiple and unspecified open wound of lower limb NOS        |
| 42 | 36308 SJ63000  | Closed injury common peroneal nerve                          |
| 43 | 1022 SK10500   | Other nose injuries                                          |
| 44 | 40689 SA20200  | Open wound foot, dorsum                                      |
| 45 | 30028 S028200  | Fracture of malar and maxillary bones                        |
| 46 |                |                                                              |
| 47 | 60108 S211300  | Open fracture scapula, glenoid                               |
| 48 | 70994 TN1z.00  | Injury ?accidental, poisoning by gas in domestic use NOS     |
| 49 | 34761 SJ60.00  | Sciatic nerve injury                                         |
| 50 | 44343 S02A.00  | Le Fort I fracture maxilla                                   |
| 51 | 28966 7J43000  | Primary open reduc spinal fracture+internal fix+plate        |
| 52 | 44245 S371.00  | Open fracture of lower limb, level unspecified               |
| 53 | 46591 SE11.12  | Bruise of periocular tissue                                  |
| 54 | 28226 SJ53100  | Closed injury, radial nerve, sensory branch                  |
| 55 | 70146 SB45200  | Anterior tibial vein injury                                  |
| 56 |                |                                                              |
| 57 | 63895 S821000  | Open wound of external ear with complication, unspecified    |
| 58 | 40368 S370.00  | Closed fracture of lower limb, level unspecified             |
| 59 |                |                                                              |
| 60 | 54602 SF22500  | Closed crush injury hand, palm                               |

|    |                |                                                             |
|----|----------------|-------------------------------------------------------------|
| 1  |                |                                                             |
| 2  | 35265 S440200  | Closed traumatic interphalangeal dislocation                |
| 3  | 33566 SJ5z.00  | Shoulder girdle or upper limb peripheral nerve injury NOS   |
| 4  | 73703 S4H2200  | Closed fracture-subluxation, tarsometatarsal joint          |
| 5  | 94435 S211z00  | Open fracture of scapula NOS                                |
| 6  |                |                                                             |
| 7  | 35233 SD80011  | Abrasion or friction burn of eyelid                         |
| 8  | 34980 N082.11  | Spontaneous joint dislocation                               |
| 9  | 1742 S234200   | Closed fracture of the distal radius, unspecified           |
| 10 | 35133 SP04X00  | Dislocation of joint prosthesis                             |
| 11 | 73802 SH52700  | Deep partial thickness burn of the leg, unspecified         |
| 12 |                |                                                             |
| 13 | 17138 7J17700  | Traction for fracture of jaw                                |
| 14 | 68992 7K1H400  | Secondary open reduct fracture bone & external fixation HFQ |
| 15 | 55433 SD1y.00  | Superficial injury trunk NOS, without major wound/infection |
| 16 | 70610 S833000  | Open wound of nose with complication, unspecified           |
| 17 | 35031 S232300  | Closed fracture radius and ulna, middle                     |
| 18 |                |                                                             |
| 19 | 44786 S331400  | Open fracture proximal tibia, lateral condyle (plateau)     |
| 20 | 53677 S224900  | Closed fracture distal humerus, bicondylar (T-Y fracture)   |
| 21 | 64685 SJ20900  | Central cervical cord injury, without bony injury, C5-7     |
| 22 | 44323 SJ55.00  | Cutaneous sensory nerve injury of upper limb                |
| 23 | 34970 S912200  | Open wound of wrist with tendon involvement                 |
| 24 |                |                                                             |
| 25 | 102245 SK17700 | Popliteus injury of knee                                    |
| 26 | 70484 S77v200  | Prostate injury without mention of open wound into cavity   |
| 27 | 34907 S210200  | Closed fracture scapula, coracoid                           |
| 28 | 36784 SH52900  | Deep partial thickness burn of the foot                     |
| 29 | 28926 7J12100  | Open reduction of fracture of mandible NEC                  |
| 30 |                |                                                             |
| 31 | 23471 S410000  | Closed traumatic dislocation shoulder joint, unspecified    |
| 32 | 53481 SH34200  | Deep full thickness burn of elbow without loss of body part |
| 33 | 34827 TN83.00  | Injury ?accidental, by extremes of cold                     |
| 34 | 34826 S835200  | Open wound of forehead with complication                    |
| 35 | 70313 S77w200  | Prostate injury with open wound into cavity                 |
| 36 |                |                                                             |
| 37 | 61936 S430111  | Radioulnar dislocation - distal                             |
| 38 | 63992 SJ1y000  | Olfactory (1st) nerve injury                                |
| 39 | 25907 SK15400  | Finger injury                                               |
| 40 | 63542 S901200  | Open wound of axillary region with complication             |
| 41 | 34730 S235700  | Open Smith's fracture                                       |
| 42 |                |                                                             |
| 43 | 97292 SH94.00  | Deep full thickness burn, without loss of body part, NOS    |
| 44 | 18389 S234000  | Closed fracture of forearm, lower end, unspecified          |
| 45 | 34708 S134100  | Closed fracture pelvis, ischium                             |
| 46 | 28731 S4F1.00  | Open fracture-dislocation, knee joint                       |
| 47 | 40579 TG80400  | Accidental burning/scalding by boiling water from kettle    |
| 48 |                |                                                             |
| 49 | 55814 S241A00  | Open fracture scaphoid, proximal pole                       |
| 50 | 34453 SE24000  | Contusion, perineum                                         |
| 51 | 34426 S230500  | Closed fracture of the proximal ulna                        |
| 52 | 26304 SB12.00  | Subclavian artery injury                                    |
| 53 | 70590 S23y000  | Open fracture of forearm, unspecified                       |
| 54 |                |                                                             |
| 55 | 3038 S834300   | Open wound of eyebrow                                       |
| 56 | 8410 S231B00   | Open fracture olecranon, intra-articular                    |
| 57 | 34396 7K1G100  | Prmy open reduction of fracture and external fixation       |
| 58 | 102735 S110700 | Cls spinal fracture with complete cervcl cord lesion, C5-7  |
| 59 |                |                                                             |
| 60 | 6213 S23C.00   | Fracture of lower end of both ulna and radius               |
|    | 56750 SH12.11  | Blister of face, head and neck, second degree burn          |



|    |                |                                                              |
|----|----------------|--------------------------------------------------------------|
| 1  |                |                                                              |
| 2  | 28846 S81..00  | Open wound of eyeball                                        |
| 3  | 12770 S61..00  | Cerebral laceration and contusion                            |
| 4  | 32771 8BC7.00  | Glueing of wound                                             |
| 5  | 16659 SC16.00  | Late effect of burn of wrist and hand                        |
| 6  | 56746 SH23500  | Full thickness burn of the buttock                           |
| 7  |                |                                                              |
| 8  | 105532 S802.11 | Laceration of lacrimal passage                               |
| 9  | 5345 S4A..00   | Fracture-dislocation or subluxation shoulder                 |
| 10 | 108187 TK53.00 | Suicide and selfinflicted injury by military firearms        |
| 11 | 24620 S352B00  | Closed fracture metatarsal base                              |
| 12 | 34302 S4G0.00  | Closed fracture-dislocation, ankle joint                     |
| 13 | 28913 S022400  | Closed fracture of mandible, ramus, unspecified              |
| 14 | 61426 TN8..00  | Injury ?accidental, by other means                           |
| 15 | 70083 SB21100  | Hepatic vein injury                                          |
| 16 | 61254 SH13.00  | Full thickness burn of the face, head or neck                |
| 17 | 63588 S235E00  | Open fracture distal radius, intra-articular other type      |
| 18 | 59959 S001z00  | Closed #skull vlt with intracranial injury+concussion unspec |
| 19 | 73430 S000z00  | Closed #skull vlt no intracranial injury + concussion unspec |
| 20 | 34172 S225.00  | Open fracture of the distal humerus                          |
| 21 | 25765 S44z.00  | Dislocation of finger or thumb not otherwise specified       |
| 22 | 40268 S234800  | Closed Galeazzi fracture                                     |
| 23 | 34151 S334000  | Closed fracture distal tibia, extra-articular                |
| 24 | 34121 S421.00  | Open traumatic dislocation elbow joint                       |
| 25 | 42963 SD50200  | Abrasion, finger, multiple                                   |
| 26 | 72611 S882200  | Degloving injury scrotum                                     |
| 27 | 47783 SH21400  | Superficial burn of the back (excluding buttock)             |
| 28 | 38590 S4J1.00  | Other open fracture-dislocation                              |
| 29 | 59729 SJ67X00  | Injury of unspecified nerve of ankle and foot                |
| 30 | 73437 SH85400  | Burn: 50-59% of body surface, 40-49% BS full thickness       |
| 31 | 6839 S339000   | Closed fracture of distal fibula                             |
| 32 | 37851 TG80600  | Accidental burning or scalding caused by tea                 |
| 33 | 32660 SJ35.00  | Lumbosacral plexus injury                                    |
| 34 | 7489 SD6y400   | Superficial injury of ankle NOS                              |
| 35 | 25669 SE30300  | Contusion, upper arm                                         |
| 36 | 41824 SH41400  | Superficial burn of the thumb and finger(s)                  |
| 37 | 43792 S24z.00  | Fracture of carpal bone NOS                                  |
| 38 | 53688 S221000  | Open fracture of proximal humerus, unspecified part          |
| 39 | 60778 S420y00  | Other closed traumatic dislocation of elbow                  |
| 40 | 8633 SF1..00   | Crush injury, trunk                                          |
| 41 | 20253 S352000  | Closed fracture of tarsal bone, unspecified                  |
| 42 | 33933 S230000  | Closed fracture of proximal forearm, unspecified part        |
| 43 | 50227 S321000  | Open fracture patella, transverse                            |
| 44 | 17097 TN...00  | Injury undetermined whether accidentally/purposely inflicted |
| 45 | 43301 S490111  | Closed dislocation of atlanto-axial joint                    |
| 46 | 33905 S250200  | Closed fracture finger metacarpal base                       |
| 47 | 52406 S220500  | Closed fracture of humerus, upper epiphysis                  |
| 48 | 38620 SJ67200  | Injury of cutaneous sensory nerve at ankle and foot level    |
| 49 | 103416 S261C00 | Open fracture thumb distal phalanx, mallet                   |
| 50 | 31073 S411411  | Open dislocation of acromioclavicular joint                  |
| 51 | 33866 S261M00  | Open fracture finger middle phalanx, shaft                   |
| 52 | 65890 SH24300  | Deep full thickness burn of abdom.wall, no loss of body part |
| 53 |                |                                                              |
| 54 |                |                                                              |
| 55 |                |                                                              |
| 56 |                |                                                              |
| 57 |                |                                                              |
| 58 |                |                                                              |
| 59 |                |                                                              |
| 60 |                |                                                              |

|    |                |                                                              |
|----|----------------|--------------------------------------------------------------|
| 1  |                |                                                              |
| 2  | 99562 SB40000  | Closed injury, common femoral artery                         |
| 3  | 108654 TN3y.00 | Injury ?accidental, other means of hang/strangle/suffocate   |
| 4  | 20445 7206400  | Open reduction of fracture of orbit and internal fixation    |
| 5  | 49796 S235500  | Open fracture distal ulna - other                            |
| 6  | 28198 S333z00  | Open fracture of tibia and fibula, shaft, NOS                |
| 7  | 6106 7K1L800   | Closed reduction of fracture of ankle                        |
| 8  | 67916 S490700  | Closed dislocation C6/C7                                     |
| 9  | 47675 S781211  | Bile duct injury with open wound into cavity                 |
| 10 | 34503 Q203600  | Other dislocation or subluxation due to birth trauma         |
| 11 | 64880 7K6G800  | Closed reduction of dislocation of upper limb                |
| 12 | 37314 S49y.00  | Other open multiple and ill-defined dislocation              |
| 13 | 63095 SJ21600  | Unspecified thoracic cord injury, without bony injury, T7-12 |
| 14 | 4047 7K6Gz00   | Primary closed reduction of traumatic joint dislocation NOS  |
| 15 | 37696 SJ5X.00  | Injury of unspecified nerve at wrist and hand level          |
| 16 | 38445 S605.00  | Concussion with loss of consciousness of unspec duration     |
| 17 | 41451 SC15.00  | Late effect of burn of eye, head and neck                    |
| 18 | 58825 SF20800  | Closed crush injury, clavicular area                         |
| 19 | 93029 S331011  | Open fracture of tibial condyles                             |
| 20 | 105467 SH22A00 | Deep partial thickness burn of the abdominal wall            |
| 21 | 35886 S821100  | Open wound of ear auricle with complication                  |
| 22 | 33678 S260400  | Closed fracture thumb proximal phalanx, base                 |
| 23 | 61517 SH12000  | Superficial part. thickness burn unspecified part face/head  |
| 24 | 7162 SD2y000   | Superficial injury shoulder NOS                              |
| 25 | 45695 S231.00  | Open fracture of proximal radius and ulna                    |
| 26 | 51770 SF22400  | Closed crush injury hand, dorsum                             |
| 27 | 94076 S613.00  | Cortex laceration with open intracranial wound               |
| 28 | 50642 S94z.00  | Multiple and unspecified open wound of upper limb NOS        |
| 29 | 33623 SJ13.11  | Sixth cranial nerve injury                                   |
| 30 | 50573 S4A1100  | Open fracture-dislocation acromio-clavicular joint           |
| 31 | 10133 SD00.00  | Abrasion or friction burn of head, without infection         |
| 32 | 27605 S294.00  | Fractures involving multiple regions of both upper limbs     |
| 33 | 45646 SJ58.00  | Supraclavicular nerve injury                                 |
| 34 | 33457 S331100  | Open fracture proximal fibula                                |
| 35 | 17107 S29..12  | Multiple rib fractures                                       |
| 36 | 33540 S224z00  | Closed fracture of distal humerus, not otherwise specified   |
| 37 | 971 S33x000    | Closed fracture of tibia, unspecified part, NOS              |
| 38 | 105278 S235211 | Dupuytren's fracture, radius - open                          |
| 39 | 44456 SE3z.00  | Contusion, upper limb NOS                                    |
| 40 | 45183 S420z00  | Closed traumatic dislocation of elbow NOS                    |
| 41 | 33496 S410z00  | Closed traumatic dislocation of shoulder NOS                 |
| 42 | 90278 SH33200  | Full thickness burn of the elbow                             |
| 43 | 60672 SH53500  | Full thickness burn of the knee                              |
| 44 | 8812 SD0y100   | Superficial injury of neck NOS                               |
| 45 | 33459 S027.00  | Open orbital blow-out fracture                               |
| 46 | 12068 SE32.00  | Contusion wrist or hand                                      |
| 47 | 108238 S73x000 | Other GIT injury without open wound into cavity, unspecified |
| 48 | 25698 SH61.00  | Superficial burn of multiple specified sites                 |
| 49 | 14677 SH50600  | Unspecified thickness burn of the thigh                      |
| 50 | 62221 S492100  | Closed dislocation thoracic spine                            |
| 51 | 33404 S236.00  | Fracture of upper end of ulna                                |

|    |                |                                                              |
|----|----------------|--------------------------------------------------------------|
| 1  |                |                                                              |
| 2  | 33393 S320.00  | Closed fracture of the patella                               |
| 3  | 33368 S64z.00  | Intracranial injury NOS                                      |
| 4  | 31963 S850.00  | Open wound of chest wall, uncomplicated                      |
| 5  | 48665 SH05.00  | Burn resulting in eyeball rupture and destruction of eyeball |
| 6  | 72266 SJ30100  | Cervical nerve root injury - C2                              |
| 7  |                |                                                              |
| 8  | 69702 7K1K700  | Primary functional bracing of fracture                       |
| 9  | 33745 SH43100  | Full thickness burn of a single finger                       |
| 10 | 50826 SJ6x000  | Closed injury obturator nerve                                |
| 11 | 31959 SB22300  | Splenic artery injury                                        |
| 12 |                |                                                              |
| 13 | 62334 S261F00  | Open fracture finger proximal phalanx, shaft                 |
| 14 | 4306 S360.00   | Closed fracture of one or more phalanges of foot             |
| 15 | 102015 S733000 | Small intestine injury with open wound into cavity, unspec   |
| 16 | 32744 SK1C000  | Injury of flexor muscle and tendon of thumb at forearm level |
| 17 | 29895 SE41z00  | Contusion, knee and lower leg NOS                            |
| 18 |                |                                                              |
| 19 | 65484 S120600  | Closed fracture of six ribs                                  |
| 20 | 32646 S225800  | Open fracture distal humerus, capitellum                     |
| 21 | 32638 S125200  | Closed fracture of thyroid cartilage                         |
| 22 | 32541 S900300  | Open wound of upper arm                                      |
| 23 |                |                                                              |
| 24 | 32476 S736.00  | Injury of stomach                                            |
| 25 | 42969 S344000  | Closed fracture ankle, bimalleolar, low fibular fracture     |
| 26 | 53651 S750.00  | Closed injury of spleen                                      |
| 27 | 17350 SK1F.00  | Injury of muscle and tendon at ankle and foot level          |
| 28 | 32276 SD4..00  | Superficial injury of hand, excluding fingers                |
| 29 |                |                                                              |
| 30 | 33413 SH43.00  | Full thickness burn of the wrist and hand                    |
| 31 | 38387 SH03.00  | Acid chemical burn of cornea and conjunctival sac            |
| 32 | 24253 SH93.11  | Third degree burn                                            |
| 33 | 22347 SD11.00  | Abrasion or friction burn of trunk, infected                 |
| 34 | 30617 S73..11  | GIT - gastrointestinal tract injury                          |
| 35 | 31153 S02y100  | Fracture of orbit NOS, open                                  |
| 36 |                |                                                              |
| 37 | 39697 SD3zz00  | Superficial injury of lower arm, infected NOS                |
| 38 | 31664 N082100  | Pathological dislocation of the shoulder region              |
| 39 | 5035 SK1B.00   | Injury of muscle + tendon of abdomen, lower back and pelvis  |
| 40 | 63065 SH44.11  | Deep third degree burn of finger,without loss of a body part |
| 41 |                |                                                              |
| 42 | 73236 SH70z00  | Burn of the mouth or pharynx NOS                             |
| 43 | 64633 S497300  | Open traumatic dislocation, sterno-clavicular joint, ant     |
| 44 | 91919 7K1G600  | Primary open reduction of fracture and skin traction         |
| 45 | 17822 S230200  | Closed fracture of ulna, coronoid                            |
| 46 | 91592 SD0z200  | Superficial injury of scalp NOS, infected                    |
| 47 |                |                                                              |
| 48 | 73428 SH53x00  | Full thickness burn of multiple sites of the leg             |
| 49 | 49906 SH20100  | Unspecified thickness burn of the breast                     |
| 50 | 61812 S201.00  | Open fracture of clavicle                                    |
| 51 | 10621 SD60200  | Abrasion, knee                                               |
| 52 | 31760 S225100  | Open fracture distal humerus, supracondylar                  |
| 53 |                |                                                              |
| 54 | 72768 SH13000  | Full thickness burn of unspecified part of the face or head  |
| 55 | 31745 SD50000  | Abrasion, finger                                             |
| 56 | 22346 SF3..11  | Crush injury of leg                                          |
| 57 | 990 SD...00    | Superficial injury                                           |
| 58 | 58190 S12X000  | Closed fracture of bony thorax part unspecified              |
| 59 | 31545 S112700  | Cls spinal fracture with complete thorac cord lesion, T7-12  |
| 60 | 12224 SA...00  | Open wound of lower limb                                     |

|    |                |                                                              |
|----|----------------|--------------------------------------------------------------|
| 1  |                |                                                              |
| 2  | 31525 S250000  | Closed fracture of metacarpal bone (s), site unspecified     |
| 3  | 89232 SH12600  | Superficial partial thickness burn of the scalp              |
| 4  | 31427 S900.00  | Open wound of shoulder/upper limb without complication       |
| 5  | 51179 SJ31400  | Thoracic nerve root injury - T5                              |
| 6  | 12288 SD31000  | Abrasion of elbow, infected                                  |
| 7  | 55077 7K1LC00  | Closed reduction of fracture of lower limb                   |
| 8  | 10570 S30y.11  | Hip fracture NOS                                             |
| 9  |                |                                                              |
| 10 | 108596 S4H1100 | Open fracture-dislocation, midtarsal joint                   |
| 11 | 4350 7J13400   | Reduction of Le Fort 1 fracture of maxilla                   |
| 12 | 27984 SJ52400  | Open injury, ulnar nerve                                     |
| 13 | 37496 S835100  | Open wound of cheek with complication                        |
| 14 | 30990 S832300  | Open wound of nasal sinus                                    |
| 15 | 30976 TD07.00  | Accident due to fall from burning private dwelling           |
| 16 | 60580 S4A2000  | Closed fracture-subluxation shoulder joint                   |
| 17 | 24929 SD70.11  | Abrasion or friction burn of heel, without infection         |
| 18 |                |                                                              |
| 19 | 106501 S497500 | Open traumatic dislocation laryngeal cartilage               |
| 20 | 29959 7K6GJ00  | Closed reduction of dislocation of nasal bone                |
| 21 | 6994 7J12.00   | Reduction of fracture of mandible                            |
| 22 | 30659 S227.00  | Fracture of shaft of humerus                                 |
| 23 | 30159 SJ32400  | Lumbar nerve root injury - L5                                |
| 24 | 56804 S894000  | Open wound of hypochondrium                                  |
| 25 | 11872 7K1LV00  | Primary closed reduction of fracture alone                   |
| 26 | 6062 S356.00   | Fracture of metatarsal bone                                  |
| 27 | 30611 S352111  | Closed fracture of astragalus                                |
| 28 | 55195 S11z.00  | Fracture of spine with spinal cord lesion NOS                |
| 29 | 72600 S106100  | Closed vertical fracture of sacrum                           |
| 30 | 30424 SR...00  | Injury involving multiple body regions                       |
| 31 | 93559 SJ31200  | Thoracic nerve root injury - T3                              |
| 32 | 93901 SH55200  | Deep full thickness burn of foot, with loss of body part     |
| 33 | 17606 S240700  | Closed fracture capitae                                      |
| 34 | 54797 S490100  | Closed dislocation atlanto-occipital joint                   |
| 35 | 53923 S27z.00  | Multiple fractures of hand bones NOS                         |
| 36 | 30324 SH42300  | Superficial partial thickness burn of more than one finger   |
| 37 | 44142 S225000  | Open fracture of elbow, unspecified part                     |
| 38 | 43448 S135400  | Open fracture pelvis, anterior superior iliac spine          |
| 39 | 94607 SJ20200  | Anterior cervical cord injury, without bony injury, C1-4     |
| 40 | 30213 7K1L300  | Remanipulation of fracture of bone NEC                       |
| 41 | 44924 S235200  | Open fracture of the distal radius, unspecified              |
| 42 | 30203 S028.00  | Fracture of skull and facial bones                           |
| 43 | 30629 TH...00  | Late effects due to accidental injury                        |
| 44 | 68300 SH12811  | Cheek - 2nd degree burn                                      |
| 45 | 30133 S440500  | Closed traumatic dislocation, interphalangeal joint,thumb    |
| 46 | 36139 SF22z00  | Crush injury, wrist and hand NOS                             |
| 47 | 35874 S480600  | Closed traumatic dislocation toe, IPJ, single                |
| 48 | 12405 SD01.00  | Abrasion or friction burn of head, infected                  |
| 49 | 51999 S301900  | Open fracture proximal femur,subcapital, Garden grade IV     |
| 50 | 8891 S3...00   | Fracture of lower limb                                       |
| 51 | 30058 S10..11  | Fracture of transverse process spine - no spinal cord lesion |
| 52 | 11639 S134z00  | Other or multiple closed fracture of pelvis NOS              |
| 53 | 29985 SD61300  | Abrasion of lower leg, infected                              |
| 54 |                |                                                              |
| 55 |                |                                                              |
| 56 |                |                                                              |
| 57 |                |                                                              |
| 58 |                |                                                              |
| 59 |                |                                                              |
| 60 |                |                                                              |

|    |                |                                                              |
|----|----------------|--------------------------------------------------------------|
| 1  |                |                                                              |
| 2  | 50433 SH22200  | Superficial partial thickness burn of the chest wall         |
| 3  | 27421 N083611  | Knee - recurrent dislocation                                 |
| 4  | 48837 S261S00  | Open fracture finger distal phalanx, base                    |
| 5  | 64871 N082N00  | Neuromuscular dislocation of the hip                         |
| 6  | 25519 S250300  | Closed fracture finger metacarpal shaft                      |
| 7  |                |                                                              |
| 8  | 89101 7206800  | Internal fixation of fracture of orbit                       |
| 9  | 35905 7K6F000  | Primry opn redctn of # dislocation of jt + skeletal traction |
| 10 | 93851 S001300  | Closed #skull vlt + intracranial injury, 1-24hr loss consc   |
| 11 | 36464 S222.00  | Closed fracture of humerus, shaft or unspecified part        |
| 12 |                |                                                              |
| 13 | 105702 S100B00 | Closed fracture axis, spondylolysis                          |
| 14 | 29796 S400.00  | Closed dislocation of jaw                                    |
| 15 | 4884 SH20400   | Unspecified thickness burn of the back (excluding buttock)   |
| 16 | 29089 S104400  | Closed fracture lumbar vertebra, transverse process          |
| 17 | 12069 SE30.00  | Contusion, shoulder or upper arm                             |
| 18 |                |                                                              |
| 19 | 61521 SJ6..00  | Pelvic girdle and lower limb peripheral nerve injury         |
| 20 | 69729 S261J00  | Open fracture finger proximal phalanx, multiple              |
| 21 | 33520 S332200  | Closed fracture of tibia and fibula, shaft                   |
| 22 | 31032 7L0H000  | Open reduction of congenital dislocation of knee             |
| 23 | 33978 SA33.00  | Degloving injury toe(s)                                      |
| 24 |                |                                                              |
| 25 | 62286 SJ21.00  | Thoracic cord injury without spinal bone injury              |
| 26 | 105348 SH44400 | Deep full thickness burn of thumb+fing, no loss of body part |
| 27 | 2206 SH50000   | Unspecified degree burn of the leg, unspecified              |
| 28 | 32432 TG8y.00  | Accidental burning caused by other hot substance or object   |
| 29 | 38028 S210000  | Closed fracture of scapula, unspecified part                 |
| 30 | 29309 S7...11  | Blast injury to internal organs                              |
| 31 |                |                                                              |
| 32 | 7265 SH91.00   | Superficial burn NOS                                         |
| 33 | 43891 TN4..00  | Injury ?accidental, drowning                                 |
| 34 | 24516 S260D00  | Closed fracture finger proximal phalanx                      |
| 35 | 62810 7K6F700  | Primary open reduction of dislocation+cast immobilisation    |
| 36 | 29152 S231100  | Open fracture olecranon, extra-articular                     |
| 37 | 29928 SB30.00  | Axillary blood vessel injury                                 |
| 38 |                |                                                              |
| 39 | 40535 S260z00  | Closed fracture of one or more phalanges of hand NOS         |
| 40 | 29134 TN5..00  | Injury ?accidental, by firearms and explosives               |
| 41 | 30429 7K1F.00  | Primary open reduction of intraarticular fracture of bone    |
| 42 | 92349 S4D3500  | Open fracture-subluxation, interphalangeal joint thumb       |
| 43 | 29121 S332.00  | Closed fracture of tibia/fibula, shaft                       |
| 44 |                |                                                              |
| 45 | 32826 S912100  | Open wound of elbow with tendon involvement                  |
| 46 | 29111 S251.00  | Open fracture of metacarpal bone(s)                          |
| 47 |                |                                                              |
| 48 | 23690 SJ8..00  | Injury of nerves and spinal cord at neck level               |
| 49 | 23803 S301800  | Open fracture proximal femur,subcapital, Garden grade III    |
| 50 | 72274 S82w.00  | Other open wound of ear with complication                    |
| 51 | 31933 7J41.00  | Decompression of fracture of spine                           |
| 52 | 29723 N082611  | Knee pathological dislocation                                |
| 53 | 72598 SD1zD00  | Superficial injury of vagina NOS, infected                   |
| 54 | 60619 SH52D00  | Deep partial thickness burn of the thigh                     |
| 55 | 92309 S895400  | Open wound of flank with complication                        |
| 56 |                |                                                              |
| 57 | 28965 S304.00  | Petrochanteric fracture                                      |
| 58 | 22900 SJ40.00  | Cervical sympathetic nerve injury                            |
| 59 | 22800 SJ5B.00  | Anterior interosseous nerve injury                           |
| 60 | 59828 SD2y200  | Superficial injury of axilla NOS                             |



|    |                |                                                              |
|----|----------------|--------------------------------------------------------------|
| 1  |                |                                                              |
| 2  | 103528 S493100 | Open dislocation thoracic spine                              |
| 3  | 66697 SH32600  | Superficial partial thickness burn of scapular region        |
| 4  | 28807 S62..12  | Subarachnoid haemorrhage following injury                    |
| 5  | 1539 S9...00   | Open wound of upper limb                                     |
| 6  | 53951 S330011  | Closed fracture of tibial condyles                           |
| 7  | 63618 S490800  | Closed dislocation C7/T1                                     |
| 8  | 52389 S234111  | Smith's fracture - closed                                    |
| 9  | 48754 SC44200  | Seq/burn+corros classfbl only accord extent/body surf involv |
| 10 | 71030 SC00.11  | Late effect of face fracture                                 |
| 11 | 34058 S260000  | Closed fracture of phalanx or phalanges, unspecified         |
| 12 | 62314 TN04.00  | Injury ?accidental, poisoning by other spec drug/medicament  |
| 13 | 28702 S132z00  | Closed fracture pubis NOS                                    |
| 14 | 28691 F4K3300  | Posterior dislocation of lens                                |
| 15 | 98460 SB24000  | Renal blood vessel injury, unspecified                       |
| 16 | 5659 SH30500   | Unspecified thickness burn of the shoulder                   |
| 17 | 61378 S222z00  | Closed fracture of humerus, shaft or unspecified part NOS    |
| 18 | 65746 S833100  | Open wound of nasal septum with complication                 |
| 19 | 32178 7K14y00  | Other specified open surgical fracture of bone               |
| 20 | 28603 S90..00  | Open wound of shoulder region and upper limb                 |
| 21 | 46673 SK1D100  | Injury of multiple muscles and tendons at hip + thigh level  |
| 22 | 3983 S122.00   | Closed fracture sternum                                      |
| 23 | 96082 SH22400  | Superficial partial thickness burn of back (excl buttock)    |
| 24 | 12516 S2B..00  | Fracture of bone of hand                                     |
| 25 | 68516 SB35100  | Open injury, digital artery                                  |
| 26 | 58996 SJ2z.00  | Spinal cord injury without spinal bone injury NOS            |
| 27 | 52339 S76z.00  | Injury to kidney NOS                                         |
| 28 | 44032 SK1A.00  | Injury of muscle and tendon at thorax level                  |
| 29 | 48325 S61..11  | Cerebellar laceration and contusion                          |
| 30 | 104820 S61xz00 | Brain cont no open intracranial wound + concussion unspec    |
| 31 | 4088 SC20.00   | Late effect of intracranial injury without skull fracture    |
| 32 | 28416 S60z.00  | Concussion NOS                                               |
| 33 | 18033 SK14000  | Unspecified injury of hand                                   |
| 34 | 37107 SH21500  | Superficial burn of the buttock                              |
| 35 | 24318 S79z.00  | Internal injury NOS                                          |
| 36 | 27950 SF10.00  | Crush injury, external genitalia                             |
| 37 | 67571 SF30500  | Open crush injury, hip                                       |
| 38 | 8646 S314.00   | Fracture of shaft of femur                                   |
| 39 | 53905 S360300  | Closed fracture multiple phalanges, toe                      |
| 40 | 4847 TG80000   | Accidental burning/scalding caused by boiling water, unspec  |
| 41 | 67973 S100G00  | Closed fracture cervical vertebra, burst                     |
| 42 | 11770 S102y00  | Other specified closed fracture thoracic vertebra            |
| 43 | 6825 S23..00   | Fracture of radius and ulna                                  |
| 44 | 59955 SD60z00  | Abrasion/friction burn of lower limb, without infection NOS  |
| 45 | 41902 SH22300  | Superficial partial thickness burn of the abdominal wall     |
| 46 | 22416 SP04a00  | Dislocation of hip joint prosthesis                          |
| 47 | 28280 SE33z00  | Contusion, finger NOS                                        |
| 48 | 61113 TK72.00  | Suicide+selfinflicted injury-jump from natural sites         |
| 49 | 33669 SA3z.00  | Open wound of toe(s) NOS                                     |
| 50 | 4846 SH2..00   | Burn of the trunk                                            |
| 51 | 7565 SE40100   | Contusion, thigh                                             |

|    |                |                                                              |
|----|----------------|--------------------------------------------------------------|
| 1  |                |                                                              |
| 2  | 7129 SH92.00   | Partial thickness burn NOS                                   |
| 3  | 33357 7K15z00  | Other surgical fracture of bone NOS                          |
| 4  | 27388 S74..00  | Injury to liver                                              |
| 5  | 33882 S2A..00  | Fracture of upper limb, level unspecified                    |
| 6  | 7997 S410111   | Anterior dislocation of shoulder                             |
| 7  |                |                                                              |
| 8  | 28214 SP22100  | Injury to nerve during surgery                               |
| 9  | 101574 S101000 | Open fracture of unspecified cervical vertebra               |
| 10 | 5130 SE4..11   | Leg bruise                                                   |
| 11 | 41856 SE24200  | Contusion, scrotum or testis                                 |
| 12 |                |                                                              |
| 13 | 63524 SJ41500  | Injury of thoracic sympathetic nerves                        |
| 14 | 62354 Q203300  | Fracture of tibia or fibula due to birth trauma              |
| 15 | 14746 S3xz.00  | Other, multiple and ill-defined fractures of lower limb NOS  |
| 16 | 40327 7K6FB00  | Primary open reduction of dislocation and external fixation  |
| 17 | 678 SA10100    | Open wound of leg                                            |
| 18 | 68963 TN6..00  | Injury ?accidental, by cutting and stabbing instruments      |
| 19 | 1775 S93z.00   | Open wound of finger(s) NOS                                  |
| 20 |                |                                                              |
| 21 | 104800 SJ63300 | Open injury common peroneal nerve                            |
| 22 | 99027 S331800  | Open fracture fibula, head                                   |
| 23 |                |                                                              |
| 24 | 28115 TK51.00  | Suicide and selfinflicted injury by shotgun                  |
| 25 | 44712 S240D00  | Closed fracture scaphoid, waist, comminuted                  |
| 26 | 28095 SD10400  | Abrasion, back                                               |
| 27 | 28081 7K1Hy00  | Other specified secondary open reduction of fracture of bone |
| 28 | 70752 SH62100  | Deep partial thickness burn of multiple specified sites      |
| 29 |                |                                                              |
| 30 | 27575 S100500  | Closed fracture of fifth cervical vertebra                   |
| 31 | 13557 TK30.00  | Suicide and selfinflicted injury by hanging                  |
| 32 | 78444 S33A.00  | Fracture of tibia                                            |
| 33 | 42440 S81z.00  | Open wound of eyeball NOS                                    |
| 34 | 27590 S235.00  | Open fracture of radius and ulna, lower end                  |
| 35 | 39921 S430.00  | Closed traumatic dislocation of wrist                        |
| 36 | 34378 S720.00  | Closed injury of diaphragm                                   |
| 37 |                |                                                              |
| 38 | 69706 SH81z00  | Burn: 10-19% of body surface NOS                             |
| 39 | 70953 SJ63500  | Open injury deep peroneal nerve (anterior tibial)            |
| 40 | 29804 S360100  | Closed fracture middle phalanx, toe                          |
| 41 | 67990 SB40100  | Open injury, common femoral artery                           |
| 42 |                |                                                              |
| 43 | 27881 S250600  | Closed fracture finger metacarpal                            |
| 44 | 65895 S4H3300  | Open fracture-subluxation, metatarsophalangeal joint, single |
| 45 | 27818 S12z.12  | Sternum fracture NOS                                         |
| 46 | 69664 S832200  | Open wound of nasal cavity                                   |
| 47 | 69646 SD6z000  | Superficial injury of hip NOS, infected                      |
| 48 |                |                                                              |
| 49 | 62489 7J43.11  | Internal fixation of fracture of spine                       |
| 50 | 27820 SH12400  | Superficial partial thickness burn of the chin               |
| 51 | 33857 S494100  | Closed dislocation of coccyx                                 |
| 52 | 65614 7K6FN00  | Primary open reduction of # dislocation+fixation+plate(s)    |
| 53 |                |                                                              |
| 54 | 25560 SEz..00  | Contusion with skin intact, NOS                              |
| 55 | 8056 S242.00   | Fracture at wrist and hand level                             |
| 56 | 6893 S224100   | Closed fracture distal humerus, supracondylar                |
| 57 | 10694 S496200  | Closed traumatic dislocation sterno-clavicular joint         |
| 58 | 60765 S251800  | Open fracture of thumb metacarpal                            |
| 59 | 10250 S4D..00  | Fracture-dislocation/subluxation finger/thumb                |
| 60 | 38431 S40z.00  | Dislocation of jaw NOS                                       |



|    |                |                                                              |
|----|----------------|--------------------------------------------------------------|
| 1  |                |                                                              |
| 2  | 2102 SA10000   | Open wound of knee                                           |
| 3  | 27643 S260S00  | Closed fracture finger distal phalanx, base                  |
| 4  | 27636 S920.00  | Open wound of hand without mention of complication           |
| 5  | 32192 SA02.00  | Open wound of hip and thigh with tendon involvement          |
| 6  | 90494 S120700  | Closed fracture of seven ribs                                |
| 7  |                |                                                              |
| 8  | 254 S463.00    | Closed traumatic dislocation of patello-femoral joint        |
| 9  | 455 S3z0000    | Greenstick fracture                                          |
| 10 | 33598 S260L00  | Closed fracture finger middle phalanx, base                  |
| 11 | 50566 TG81500  | Accidental burning caused by hydrofluoric acid               |
| 12 | 92383 SF0X.00  | Crushing injury of head, part unspecified                    |
| 13 |                |                                                              |
| 14 | 4029 S210300   | Closed fracture scapula, glenoid                             |
| 15 | 51566 SH42.12  | Second degree burn of finger                                 |
| 16 | 28800 S4H0400  | Closed fracture-dislocation, IPJ, single toe                 |
| 17 | 59630 SC1z.00  | Late effect of skin and subcutaneous tissue injury NOS       |
| 18 | 72313 SB1y100  | Intercostal vein injury                                      |
| 19 |                |                                                              |
| 20 | 15376 S224.00  | Closed fracture of the distal humerus                        |
| 21 | 48289 SH11400  | Superficial burn of the chin                                 |
| 22 | 50659 SH22z00  | Partial thickness burn of the trunk NOS                      |
| 23 | 40992 S353200  | Open fracture navicular                                      |
| 24 |                |                                                              |
| 25 | 110097 SB1y400 | Azygos vein injury                                           |
| 26 | 33644 7K6GM00  | Closed reduction of dislocation of joint & internal fixation |
| 27 | 28142 SE45.00  | Contusion, lower limb NOS                                    |
| 28 | 27470 TK61.00  | Suicide and selfinflicted injury by stabbing                 |
| 29 | 993 S242200    | Fracture of other metacarpal bone                            |
| 30 |                |                                                              |
| 31 | 28621 7J03z00  | Reduction of fracture of facial bone NOS                     |
| 32 | 28244 S120z00  | Closed fracture of rib(s) NOS                                |
| 33 | 105819 S347100 | Open fracture ankle, trimalleolar, high fibular fracture     |
| 34 | 30286 TN3..00  | Injury ?accidental, hanging, strangulation and suffocation   |
| 35 | 9107 SH11600   | Superficial burn of the scalp                                |
| 36 |                |                                                              |
| 37 | 110554 S761000 | Kidney injury with open wound into cavity, unspecified       |
| 38 | 61999 S420300  | Closed traumatic dislocation elbow joint, medial             |
| 39 | 40358 S223100  | Open fracture of humerus, shaft                              |
| 40 | 98594 TKx3.00  | Suicide and selfinflicted injury by extremes of cold         |
| 41 | 26408 S02xz00  | Fracture of other facial bones, closed, NOS                  |
| 42 | 59985 S241C00  | Open fracture scaphoid, waist, oblique                       |
| 43 |                |                                                              |
| 44 | 26231 SJ3..11  | Spinal plexus injury                                         |
| 45 | 68709 S450200  | Closed traumatic obturator dislocation of hip                |
| 46 | 108556 SyuBC00 | [X]Dislocation, sprain and strain of unspecif body region    |
| 47 | 26130 7K1LD00  | Closed reduction of fracture of nasal bone                   |
| 48 |                |                                                              |
| 49 | 45844 L336.11  | Bruising of cord                                             |
| 50 | 47875 S411.00  | Open traumatic dislocation of shoulder                       |
| 51 | 26087 S463000  | Closed traumatic dislocation patello-femoral joint, lateral  |
| 52 | 68981 S02C.00  | Le Fort III fracture maxilla                                 |
| 53 | 102084 S010400 | Closed #skull bse no intracranial injury, >24hr LOC+recovery |
| 54 | 68217 SJ64000  | Closed injury cutaneous sensory nerve, leg                   |
| 55 | 22443 SH0x.00  | Burn of eyelid NOS                                           |
| 56 | 36391 S300400  | Closed fracture head of femur                                |
| 57 |                |                                                              |
| 58 | 46545 S62z.00  | Cerebral haemorrhage following injury NOS                    |
| 59 | 51930 SH43.12  | Third degree burn of hand                                    |
| 60 | 25817 S932.00  | Open wound of finger or thumb with tendon involvement        |

|    |                |                                                              |
|----|----------------|--------------------------------------------------------------|
| 1  |                |                                                              |
| 2  | 35837 S240600  | Closed fracture trapezoid                                    |
| 3  | 65848 S4D1000  | Open fracture-dislocation digit, unspecified                 |
| 4  | 40476 S234500  | Closed fracture distal ulna, unspecified                     |
| 5  | 99079 S735300  | Descending colon injury with open wound into cavity          |
| 6  | 24011 SJ65.00  | Injury of multiple nerves at hip and thigh level             |
| 7  |                |                                                              |
| 8  | 25538 S910.00  | Open wound of lower arm without mention of complication      |
| 9  | 57923 S130300  | Closed fracture acetabulum, posterior column                 |
| 10 | 61820 S431.00  | Open traumatic dislocation of the wrist                      |
| 11 | 33503 S100611  | C6 vertebra closed fracture without spinal cord lesion       |
| 12 |                |                                                              |
| 13 | 10696 S127000  | Multiple fractures of ribs                                   |
| 14 | 18031 SD01200  | Abrasion of scalp, infected                                  |
| 15 | 66469 S741300  | Liver moderate laceration with open wound into cavity        |
| 16 | 70108 S835z00  | Open wound of face with complication, NOS                    |
| 17 | 36318 SE30100  | Contusion, scapular area                                     |
| 18 |                |                                                              |
| 19 | 19915 SD00z00  | Abrasion head NOS                                            |
| 20 | 35640 SF20000  | Crush injury, shoulder region                                |
| 21 | 35289 S43z.00  | Dislocation of wrist NOS                                     |
| 22 | 8346 SF...00   | Crushing injury                                              |
| 23 | 66334 SH12900  | Superficial partial thickness burn of the neck               |
| 24 | 10357 S240200  | Closed fracture lunate                                       |
| 25 | 11066 S234900  | Closed volar Barton's fracture                               |
| 26 | 3127 S82..00   | Open wound of ear                                            |
| 27 |                |                                                              |
| 28 | 26045 S240500  | Closed fracture trapezium                                    |
| 29 | 41921 SD9z.00  | Other superficial injury, infected, NOS                      |
| 30 | 66241 SJ60000  | Closed injury sciatic nerve                                  |
| 31 | 61732 7K6GF11  | Closed reduction of dislocation of leg                       |
| 32 | 9342 SJ0..00   | Optic nerve and pathway injury                               |
| 33 |                |                                                              |
| 34 | 17993 SH50400  | Unspecified thickness burn of the lower leg                  |
| 35 | 40537 S420000  | Closed traumatic dislocation of elbow, unspecified           |
| 36 | 66109 TK01000  | Suicide and self inflicted injury by Amylobarbitone          |
| 37 | 48125 S441200  | Open traumatic interphalangeal dislocation                   |
| 38 | 45394 7K1F300  | Primary intraarticular fixation intraartic fracture bone NEC |
| 39 | 307 SK17100    | Other leg injury                                             |
| 40 | 2442 S355.00   | Fracture of talus                                            |
| 41 |                |                                                              |
| 42 | 15184 S00..00  | Fracture of vault of skull                                   |
| 43 | 44298 SE3y.00  | Contusion, upper limb, multiple sites                        |
| 44 | 43378 S351.00  | Open fracture of calcaneus                                   |
| 45 | 42692 S61z.00  | Cerebral laceration and contusion NOS                        |
| 46 | 65812 S491.00  | Open dislocation cervical spine                              |
| 47 |                |                                                              |
| 48 | 51710 S480A00  | Closed traumatic dislocation, subtalar joint                 |
| 49 | 101993 7K6Gc00 | Primary closed reduction of # dislocation+external fixation  |
| 50 | 30616 N331000  | Pathological fracture of thoracic vertebra                   |
| 51 | 12186 S4z..00  | Dislocation or subluxation not otherwise specified           |
| 52 | 66513 SH44100  | Deep full thickness burn of a finger, no loss of body part   |
| 53 | 21950 TG8y000  | Accid burning caused by heat from electric heating appliance |
| 54 | 32218 SH41100  | Superficial burn of a single finger                          |
| 55 | 9459 SE3..00   | Contusion, upper limb                                        |
| 56 |                |                                                              |
| 57 | 94406 7K6GT00  | Primary closed reduction of dislocation+skeletal traction    |
| 58 | 65710 SH12500  | Superficial partial thickness burn of the nose               |
| 59 |                |                                                              |
| 60 | 17673 S930000  | Open wound, finger                                           |

|    |               |                                                              |
|----|---------------|--------------------------------------------------------------|
| 1  |               |                                                              |
| 2  | 45562 S312400 | Closed fracture distal femur, medial condyle                 |
| 3  | 3675 S10B100  | Fracture of sacrum                                           |
| 4  | 65636 S234912 | Closed volar Barton fracture-subluxation                     |
| 5  | 34315 SH0z.00 | Burn confined to eye and adnexa NOS                          |
| 6  | 65606 7J41y00 | Other specified decompression of fracture of spine           |
| 7  | 65600 SB32.00 | Radial blood vessel injury                                   |
| 8  | 72711 S110600 | Cls spinal fracture with unspec cervical cord lesion, C5-7   |
| 9  | 37523 S490.11 | Closed dislocation of cervical vertebra                      |
| 10 | 44047 SCz..00 | Late effect injury/poison/toxin effect/external cause NOS    |
| 11 | 45141 S302100 | Closed fracture proximal femur, intertrochanteric, two part  |
| 12 | 30418 S235800 | Open Galeazzi fracture                                       |
| 13 | 34197 S120400 | Closed fracture of four ribs                                 |
| 14 | 65455 S450300 | Closed traumatic dislocation hip joint, anterior             |
| 15 | 65448 TK6z.00 | Suicide and selfinflicted injury by cutting and stabbing NOS |
| 16 | 52194 S300300 | Closed fracture proximal femur, basicervical                 |
| 17 | 69586 S497100 | Open traumatic dislocation of pelvis                         |
| 18 | 52614 S231200 | Open fracture of ulna, coronoid                              |
| 19 | 65301 S23yz00 | Open fracture of radius and ulna, NOS                        |
| 20 | 1486 S410400  | Closed traumatic dislocation acromio-clavicular joint        |
| 21 | 44839 S470.00 | Closed traumatic dislocation ankle joint                     |
| 22 | 65285 SF31500 | Open crush injury, knee                                      |
| 23 | 45011 S4J1100 | Open fracture-dislocation of pelvis                          |
| 24 | 57088 SB22500 | Superior mesenteric artery trunk injury                      |
| 25 | 11262 S235300 | Open fracture of ulna, styloid process                       |
| 26 | 97514 S71z.00 | Heart and lung injury NOS                                    |
| 27 | 40361 S251600 | Open fracture finger metacarpal                              |
| 28 | 93650 S4H3.00 | Open fracture-subluxation, foot                              |
| 29 | 89688 S030z00 | Closed #skull NOS no intracranial inj + concussion unspec    |
| 30 | 31542 SD61000 | Abrasion of hip, infected                                    |
| 31 | 94385 S77v100 | Ovary injury without mention of open wound into cavity       |
| 32 | 33792 SE32z00 | Contusion, wrist and hand NOS                                |
| 33 | 73411 S042.00 | Mult #skull/face + other bones, open, no intracranial injury |
| 34 | 65011 PE41300 | Congenital dislocation of patella                            |
| 35 | 4572 S33x200  | Closed fracture of tibia and fibula, unspecified part        |
| 36 | 54821 S492.00 | Closed dislocation of thoracic and lumbar spine              |
| 37 | 7256 SD5..00  | Superficial of injury finger(s)                              |
| 38 | 69919 S300100 | Closed fracture proximal femur, transepiphyseal              |
| 39 | 53279 S312000 | Closed fracture of distal femur, unspecified                 |
| 40 | 62787 S33yz00 | Open fracture of tibia and fibula, unspecified part, NOS     |
| 41 | 43589 SJ67100 | Injury of medial plantar nerve                               |
| 42 | 44711 S200100 | Closed fracture clavicle, medial end                         |
| 43 | 99994 7K1K900 | Other primary external immobilisation of fracture            |
| 44 | 64744 TKx5.00 | Suicide and selfinflicted injury by crashing motor vehicle   |
| 45 | 96346 SJ81.00 | Crush injury of phrenic nerve                                |
| 46 | 64725 S241700 | Open fracture capitata                                       |
| 47 | 18840 S330300 | Closed fracture proximal tibia, medial condyle (plateau)     |
| 48 | 48636 S025.00 | Fracture of malar or maxillary bones, open                   |
| 49 | 64575 S241D00 | Open fracture scaphoid, waist, comminuted                    |
| 50 | 36332 S210600 | Closed fracture scapula, neck                                |
| 51 | 95675 S750300 | Spleen parenchyma laceration without open wound into cavity  |

|    |                |                                                            |
|----|----------------|------------------------------------------------------------|
| 1  |                |                                                            |
| 2  | 53698 S235D00  | Open fracture distal radius, extra-articular other type    |
| 3  | 50154 SH10600  | Unspecified thickness burn of the scalp                    |
| 4  | 64444 SH0..14  | Periocular burns                                           |
| 5  | 1922 SH40000   | Unspecified thickness burn of the hand, unspecified        |
| 6  | 94981 S497200  | Open traumatic dislocation sterno-clavicular joint         |
| 7  | 64714 SF10z00  | Crush injury, external genitalia NOS                       |
| 8  | 97803 S353D00  | Open fracture metatarsal neck                              |
| 9  | 50990 SH33400  | Full thickness burn of the axilla                          |
| 10 | 28251 S360200  | Closed fracture distal phalanx, toe                        |
| 11 | 25113 SA20100  | Open wound foot, plantar                                   |
| 12 | 63186 SB42.00  | Femoral vein injury                                        |
| 13 | 109936 S481z00 | Open traumatic dislocation of foot not otherwise specified |
| 14 | 41299 SJ5y000  | Injury of cutaneous sensory nerve at forearm level         |
| 15 | 64297 S100L00  | Closed fracture cervical vertebra, transverse process      |
| 16 | 33824 SH50500  | Unspecified thickness burn of the knee                     |
| 17 | 41930 S100z00  | Closed fracture of cervical spine not otherwise specified  |
| 18 | 60397 SJ51400  | Open injury, median nerve, palmar sensory branch           |
| 19 | 58787 SJ0z.00  | Optic nerve or pathway injury NOS                          |
| 20 | 45881 SJ15.13  | Eighth cranial nerve injury                                |
| 21 | 52470 S134700  | Closed vertical fracture of ilium                          |
| 22 | 8590 SA2..00   | Open wound of foot, excluding toe(s)                       |
| 23 | 72724 S942.00  | Multiple/unspec open wound upper limb with tendon involved |
| 24 | 98158 7K6GY00  | Primary closed reduction of # dislocation+cast immobil     |
| 25 | 41914 SH41500  | Superficial burn of the palm of hand                       |
| 26 | 55655 SB3X.00  | Injury of unspecified blood vessel at forearm level        |
| 27 | 33720 S224000  | Closed fracture of elbow, unspecified part                 |
| 28 | 22542 S441400  | Open traumatic dislocation, proximal interphalangeal joint |
| 29 | 64026 SA32.11  | Open wound of toe(s) with tendon injury                    |
| 30 | 94817 S740300  | Liver moderate laceration without open wound into cavity   |
| 31 | 24886 S932400  | Mallet finger with open tendon injury                      |
| 32 | 42805 S313300  | Open fracture distal femur, supracondylar                  |
| 33 | 71866 S041z00  | Closed #skull/face,mult + intracran inj, concussion unspec |
| 34 | 85491 S4B3.00  | Open fracture-subluxation elbow                            |
| 35 | 985 S440000    | Closed traumatic dislocation of finger, unspecified        |
| 36 | 63948 S231900  | Open fracture of the proximal radius                       |
| 37 | 44721 S220000  | Closed fracture of proximal humerus, unspecified part      |
| 38 | 1852 SH20300   | Unspecified thickness burn of the abdominal wall           |
| 39 | 51308 S641.00  | Intracranial injury NOS + open intracranial wound          |
| 40 | 62461 SJ64200  | Closed injury lateral cutaneous nerve thigh                |
| 41 | 60542 S712000  | Lung injury without open wound into thorax, unspecified    |
| 42 | 92886 SJ24000  | Closed injury cauda equina                                 |
| 43 | 63736 SF20700  | Closed crush injury, upper arm                             |
| 44 | 24598 S250500  | Closed fracture finger metacarpal head                     |
| 45 | 59154 SH52C00  | Deep partial thickness burn of the knee                    |
| 46 | 37469 SH60.00  | Unspecified thickness burn of multiple specified sites     |
| 47 | 57247 S781400  | Retroperitoneum injury with open wound into cavity         |
| 48 | 56332 S713200  | Lung laceration with open wound into thorax                |
| 49 | 30377 Z6G1900  | Fracture - traction                                        |
| 50 | 43606 SE31z00  | Contusion, elbow and forearm NOS                           |
| 51 | 53750 SA03.00  | Degloving injury, hip or thigh                             |
| 52 |                |                                                            |
| 53 |                |                                                            |
| 54 |                |                                                            |
| 55 |                |                                                            |
| 56 |                |                                                            |
| 57 |                |                                                            |
| 58 |                |                                                            |
| 59 |                |                                                            |
| 60 |                |                                                            |

|    |                |                                                             |
|----|----------------|-------------------------------------------------------------|
| 1  |                |                                                             |
| 2  | 28425 S240E00  | Closed fracture scaphoid, tuberosity                        |
| 3  | 63424 S460.11  | Bucket handle tear - current injury                         |
| 4  | 51991 SH41.15  | First degree burn of wrist                                  |
| 5  | 12275 SH40.11  | Unspecified degree burn of finger                           |
| 6  | 483 S20..00    | Fracture of clavicle                                        |
| 7  | 7910 SF23.11   | Crush injury of thumb                                       |
| 8  | 19387 S302011  | Closed fracture of femur, greater trochanter                |
| 9  | 49567 S114000  | Closed spinal fracture with unspecified lumbar cord lesion  |
| 10 | 32210 SH41600  | Superficial burn of the back of hand                        |
| 11 | 40330 S220600  | Closed fracture proximal humerus, three part                |
| 12 | 70191 S850000  | Degloving injury chest wall                                 |
| 13 | 17370 7K6G700  | Closed reduction of dislocation of thumb                    |
| 14 | 27626 S94..00  | Multiple and unspecified open wound of upper limb           |
| 15 | 1700 S352.11   | March fracture                                              |
| 16 | 43638 SK1z.00  | Other injury NOS                                            |
| 17 | 235 S32..00    | Fracture of patella                                         |
| 18 | 169 S35..11    | Metatarsal bone fracture                                    |
| 19 | 34773 S900000  | Open wound of shoulder region                               |
| 20 | 25716 SD1yD00  | Superficial injury of vagina NOS, without major open wound  |
| 21 | 24671 S101500  | Open fracture of fifth cervical vertebra                    |
| 22 | 63958 SF02200  | Crush injury, pharynx                                       |
| 23 | 59147 SF20100  | Crush injury, scapular region                               |
| 24 | 100278 S451200 | Open traumatic obturator dislocation of hip                 |
| 25 | 17455 S02z.11  | Jaw fracture NOS                                            |
| 26 | 6074 S235100   | Open Colles' fracture                                       |
| 27 | 60254 7J12000  | Reduction of fracture of alveolus of mandible               |
| 28 | 92356 7J42z00  | Other reduction of fracture of spine NOS                    |
| 29 | 96689 SH32A00  | Deep partial thickness burn of the upper arm                |
| 30 | 62852 S820z00  | Open wound of external ear not otherwise specified          |
| 31 | 34424 S36z.00  | Fracture of one or more phalanges of foot NOS               |
| 32 | 61093 SC3z.00  | Late effect of injury NOS                                   |
| 33 | 72908 7K15y00  | Other specified other surgical fracture of bone             |
| 34 | 99382 SH87500  | Burn: 70-79% of body surface, 50-59% BS full thickness      |
| 35 | 7831 S120000   | Closed fracture of rib, unspecified                         |
| 36 | 39807 SF4z.00  | Crush injury, unspecified site                              |
| 37 | 38489 S300.00  | Closed fracture proximal femur, transcervical               |
| 38 | 7339 7K1LA00   | Closed reduction of fracture of toe                         |
| 39 | 102965 S4A1000 | Open fracture-dislocation shoulder joint                    |
| 40 | 17958 S001000  | Closed #skull vlt + intracranial injury, unspec state consc |
| 41 | 107788 SJ20600 | Unspecified cervical cord injury, without bony injury, C5-7 |
| 42 | 93981 N331N11  | Minimal trauma fracture                                     |
| 43 | 62697 S902200  | Open wound of axillary region with tendon involvement       |
| 44 | 72071 S4H2000  | Closed fracture-subluxation, subtalar joint                 |
| 45 | 10009 S346.00  | Closed fracture ankle, trimalleolar                         |
| 46 | 41799 SD30z00  | Abrasion/friction burn of lower arm, without infection NOS  |
| 47 | 40596 SH52200  | Superficial partial thickness burn of the foot              |
| 48 | 22254 SJ30300  | Cervical nerve root injury - C4                             |
| 49 | 100254 S775.00 | Open injury of uterus                                       |
| 50 | 62631 S4J2000  | Closed fracture-subluxation of sternum                      |
| 51 | 96688 SH54.00  | Deep full thickness burn of leg without loss of body part   |



|    |                |                                                             |
|----|----------------|-------------------------------------------------------------|
| 1  |                |                                                             |
| 2  | 40818 S481400  | Open traumatic metatarsal dislocation, unspecified          |
| 3  | 16282 S834500  | Open wound of jaw                                           |
| 4  | 35276 SH10500  | Unspecified thickness burn of the nose                      |
| 5  | 40367 S224300  | Closed fracture distal humerus, medial condyle              |
| 6  | 60823 SB25500  | Uterine artery injury                                       |
| 7  | 69637 SD1z500  | Superficial injury of buttock NOS, infected                 |
| 8  | 35849 S112.00  | Closed fracture of thoracic spine with spinal cord lesion   |
| 9  | 108618 SH42B00 | Deep partial thickness burn of more than one finger         |
| 10 | 99062 SH42.15  | Second degree burn of wrist                                 |
| 11 | 47839 S225z00  | Open fracture of distal humerus, not otherwise specified    |
| 12 | 50115 SH42E00  | Deep partial thickness burn of back of hand                 |
| 13 | 33411 SH80.00  | Burn involving <10% of body surface (BS)                    |
| 14 | 17514 SH51300  | Superficial burn of the ankle                               |
| 15 | 62162 S711.00  | Heart injury, open                                          |
| 16 | 44505 SC0z.00  | Late effect of musculoskeletal/connective tissue injury NOS |
| 17 | 62683 SB47300  | Injury of multiple blood vessels at lower leg level         |
| 18 | 62065 S490400  | Closed dislocation C3/C4                                    |
| 19 | 845 S35..00    | Fracture of one or more tarsal and metatarsal bones         |
| 20 | 9606 SE11.13   | Eyelid injury                                               |
| 21 | 62029 7K1Hz00  | Secondary open reduction of fracture of bone NOS            |
| 22 | 2603 S3...11   | Leg fracture                                                |
| 23 | 43132 S7...00  | Internal injury of chest, abdomen and pelvis                |
| 24 | 34873 S100511  | C5 vertebra closed fracture without spinal cord lesion      |
| 25 | 43667 TG80A00  | Accidental burning/scalding caused by soup, stew or curries |
| 26 | 99514 S401.00  | Open dislocation of jaw                                     |
| 27 | 61982 S923000  | Degloving injury hand, palmar                               |
| 28 | 2250 S344.12   | Pott's fracture - ankle                                     |
| 29 | 20195 S00z.00  | Fracture of vault of skull NOS                              |
| 30 | 33704 S4A0000  | Closed fracture-dislocation shoulder joint                  |
| 31 | 61757 S01..17  | Posterior fossa fracture                                    |
| 32 | 33967 S100211  | C2 vertebra closed fracture without spinal cord lesion      |
| 33 | 8314 S646000   | Minor head injury                                           |
| 34 | 61802 S312z00  | Closed fracture of distal femur not otherwise specified     |
| 35 | 6235 SF33.00   | Crush injury, toe(s)                                        |
| 36 | 15085 7K1Lz00  | Other closed reduction of fracture of bone NOS              |
| 37 | 100309 S821.00 | Open wound of external ear with complication                |
| 38 | 99568 SA42.00  | Multiple and unspec open wound leg with tendon involvement  |
| 39 | 9103 S02..00   | Fracture of face bones                                      |
| 40 | 105727 SJ6x300 | Open injury pudendal nerve                                  |
| 41 | 62747 N083E00  | Recurrent dislocation of shoulder - inferior                |
| 42 | 8573 S00..12   | Parietal bone fracture                                      |
| 43 | 325 S34..00    | Fracture of ankle                                           |
| 44 | 60828 S4A3100  | Open fracture-subluxation acromio-clavicular joint          |
| 45 | 54271 S901.00  | Open wound of shoulder and upper limb with complication     |
| 46 | 61569 TK70.00  | Suicide+selfinflicted injury-jump from residential premises |
| 47 | 61551 SH12100  | Superficial partial thickness burn of the ear               |
| 48 | 199 S23B.00    | Fracture of lower end of radius                             |
| 49 | 36268 S022z00  | Fracture of mandible, closed, NOS                           |
| 50 | 42978 S330z00  | Closed fracture of tibia and fibula, proximal NOS           |
| 51 | 65753 SJ31700  | Thoracic nerve root injury - T8                             |

|    |                |                                                              |
|----|----------------|--------------------------------------------------------------|
| 1  |                |                                                              |
| 2  | 16232 S496000  | Closed traumatic dislocation of sternum                      |
| 3  | 67696 S895.00  | Open wound of lateral abdominal wall with complication       |
| 4  | 5507 SH20000   | Unspecified thickness burn of unspecified part of the trunk  |
| 5  | 95585 S104600  | Closed fracture lumbar vertebra, tricolunar                  |
| 6  | 12823 7K1J300  | Closed reduction fracture small bone & fixation using screw  |
| 7  | 8896 SD7y200   | Contusion of toe(s) with damage to nail                      |
| 8  | 54855 S125300  | Closed fracture of trachea                                   |
| 9  | 45482 N083N00  | Recurrent dislocation of elbow                               |
| 10 | 61357 S003600  | Open #skull vlt + intracranial injury, LOC unspec duration   |
| 11 | 4465 7J03200   | Reduction of fracture of zygomatic bones                     |
| 12 | 42144 S73x500  | Appendix injury without mention of open wound into cavity    |
| 13 | 94031 S261400  | Open fracture thumb proximal phalanx, base                   |
| 14 | 37865 S361.00  | Open fracture of one or more phalanges of foot               |
| 15 | 64545 S353C00  | Open fracture metatarsal shaft                               |
| 16 | 62975 S430800  | Closed traumatic dislocation other carpal joint              |
| 17 | 49526 S320000  | Closed fracture patella, transverse                          |
| 18 | 61237 SH25.00  | Deep full thickness burn of trunk, with loss of body part    |
| 19 | 61181 S260C00  | Closed fracture thumb distal phalanx, mallet                 |
| 20 | 44543 SF2y.00  | Crush injury, arm, multiple sites                            |
| 21 | 60137 S920200  | Multiple open wounds of wrist and hand                       |
| 22 | 41996 S480z00  | Closed traumatic dislocation of foot not otherwise specified |
| 23 | 28203 SHz..00  | Burns NOS                                                    |
| 24 | 60885 S301600  | Open fracture proximal femur,subcapital, Garden grade I      |
| 25 | 6311 SD5y.00   | Superficial injury of finger NOS, without infection          |
| 26 | 69213 S241800  | Open fracture hamate                                         |
| 27 | 97299 S833z00  | Open wound of nose with complication, NOS                    |
| 28 | 73322 SH12200  | Superficial partial thickness burn of the eye                |
| 29 | 24807 SD2..00  | Superficial injury of shoulder and upper arm                 |
| 30 | 97430 TN80000  | Injury ?accidental, by jumping before moving object          |
| 31 | 27687 SJ56100  | Closed injury, digital nerve in finger                       |
| 32 | 29119 S02x.00  | Closed fracture other facial bone                            |
| 33 | 61733 S303.00  | Open fracture of proximal femur, pertrochanteric             |
| 34 | 5302 S132.00   | Closed fracture pubis                                        |
| 35 | 60640 SH20x00  | Unspecified thickness burn of multiple sites of the trunk    |
| 36 | 10470 SK17500  | Injury of lower leg                                          |
| 37 | 29406 S89v.00  | Other and unspecified open wound of trunk                    |
| 38 | 7135 S342000   | Closed fracture ankle, lateral malleolus, low                |
| 39 | 48238 TN55.00  | Injury ?accidental, by explosive                             |
| 40 | 45835 SH81.00  | Burn involving 10-19% of body surface (BS)                   |
| 41 | 33684 S261D00  | Open fracture finger proximal phalanx                        |
| 42 | 107128 SB44500 | Open injury, popliteal artery                                |
| 43 | 23764 7K6GC00  | Closed reduction of dislocation of ankle                     |
| 44 | 108242 S353600 | Open fracture lateral cuneiform                              |
| 45 | 30230 SJ52000  | Closed injury, ulnar nerve                                   |
| 46 | 44628 S4H0.00  | Closed fracture-dislocation foot                             |
| 47 | 10622 S221.11  | Shoulder fracture - open                                     |
| 48 | 8263 S350.11   | Heel bone fracture                                           |
| 49 | 60512 SH50x00  | Unspecified thickness burn of multiple sites of the leg      |
| 50 | 42710 SF40.00  | Crush injury, multiple sites NEC                             |
| 51 | 50133 S913.00  | Degloving injury lower arm                                   |



|    |                |                                                              |
|----|----------------|--------------------------------------------------------------|
| 1  |                |                                                              |
| 2  | 60463 SH21.00  | Superficial burn of the trunk                                |
| 3  | 42959 S410200  | Closed traumatic dislocation shoulder joint, posterior       |
| 4  | 60419 S82y.00  | Open wound of ear with complication, NOS                     |
| 5  | 54154 SH53400  | Full thickness burn of the lower leg                         |
| 6  | 45216 F4F1500  | Dislocation of lacrimal gland                                |
| 7  | 64370 SH83z00  | Burn: 30-39% of body surface NOS                             |
| 8  |                |                                                              |
| 9  | 109839 SJ22000 | Unspecified lumbar cord injury without bony injury           |
| 10 | 11378 S12z.11  | Rib fracture NOS                                             |
| 11 | 22289 SD71.11  | Abrasion or friction burn of heel, infected                  |
| 12 | 49710 S734500  | Rectum injury without mention of open wound into cavity      |
| 13 | 67239 S353J00  | Open fracture of base of fifth metatarsal                    |
| 14 | 9590 S923.00   | Degloving injury hand                                        |
| 15 | 72263 SB23500  | Gastric vein injury                                          |
| 16 | 6067 SF21100   | Crush injury, elbow                                          |
| 17 | 57328 S03z.00  | Skull fracture NOS                                           |
| 18 | 23721 S7...13  | Internal injury of chest                                     |
| 19 |                |                                                              |
| 20 | 102033 S741z00 | Liver injury with open wound into cavity, NOS                |
| 21 | 24311 SB32200  | Injury of radial artery at wrist and hand level              |
| 22 | 51985 SJ30400  | Cervical nerve root injury - C5                              |
| 23 | 25209 SB4y.00  | Other leg blood vessel injury                                |
| 24 | 73613 S121000  | Open fracture of rib, unspecified                            |
| 25 | 68676 S630.11  | Cerebral compression due to injury                           |
| 26 | 70049 TN08.00  | Injury ?accidental, poisoning by arsenic or its compounds    |
| 27 | 65007 SH12800  | Superficial partial thickness burn of the cheek              |
| 28 | 50461 SF3y.00  | Crush injury, lower limb, multiple sites                     |
| 29 | 28538 S127100  | Cough fracture of ribs                                       |
| 30 | 17352 SC3C100  | Sequelae of dislocation, sprain and strain of upper limb     |
| 31 | 73922 SB45000  | Tibial blood vessel injury, unspecified                      |
| 32 | 10033 S234F00  | Closed Barton's fracture                                     |
| 33 | 29636 SH30000  | Unspecified thickness burn of the arm, unspecified           |
| 34 | 33870 S21z.00  | Fracture of scapula NOS                                      |
| 35 | 69209 S611.00  | Open cerebral contusion                                      |
| 36 | 9900 SF32011   | Crush injury of heel                                         |
| 37 | 59798 S01..11  | Anterior fossa fracture                                      |
| 38 | 49183 SB03.00  | Injury of multiple blood vessels at neck level               |
| 39 |                |                                                              |
| 40 | 101056 TK5z.00 | Suicide and selfinflicted injury by firearms/explosives NOS  |
| 41 | 68100 SJ34100  | Closed injury, brachial plexus, lower roots                  |
| 42 | 4210 SD90.00   | Abrasion or friction burn, without infection, NOS            |
| 43 | 43153 S352z00  | Closed fracture of one or more tarsal + metatarsal bones NOS |
| 44 | 59504 S933500  | Ring avulsion injury, class 4                                |
| 45 | 45275 S221z00  | Open fracture of proximal humerus not otherwise specified    |
| 46 | 46522 SH42.13  | Second degree burn of hand                                   |
| 47 | 69551 SP04A00  | Fracture of bone autograft                                   |
| 48 | 39067 SH10900  | Unspecified thickness burn of the neck                       |
| 49 | 64229 S4A1.00  | Open fracture-dislocation shoulder                           |
| 50 | 34284 SE06.00  | Bruise of mandibular joint area                              |
| 51 | 50103 S832100  | Open wound of nasal septum                                   |
| 52 | 59302 SJ57.00  | Suprascapular nerve injury                                   |
| 53 | 59291 S523E00  | Volar plate injury, thumb, interphalangeal joint             |
| 54 | 64365 SH41x00  | First degree burn of multiple sites of the wrist or hand     |
| 55 |                |                                                              |
| 56 |                |                                                              |
| 57 |                |                                                              |
| 58 |                |                                                              |
| 59 |                |                                                              |
| 60 |                |                                                              |

|    |                |                                                              |
|----|----------------|--------------------------------------------------------------|
| 1  |                |                                                              |
| 2  | 21680 SJ53.00  | Radial nerve injury                                          |
| 3  | 55012 SH13900  | Full thickness burn of the neck                              |
| 4  | 59216 SH12711  | Forehead - 2nd degree burn                                   |
| 5  | 106522 SF22700 | Open crush injury wrist, volar                               |
| 6  | 68387 S871.00  | Open wound of buttock with complication                      |
| 7  |                |                                                              |
| 8  | 10246 S231300  | Open Monteggia's fracture                                    |
| 9  | 47856 SH31.00  | Superficial burn of the arm                                  |
| 10 | 73150 S251200  | Open fracture finger metacarpal base                         |
| 11 | 63298 SJ01.00  | Optic chiasm injury                                          |
| 12 |                |                                                              |
| 13 | 2710 S35..12   | Tarsal bone fracture                                         |
| 14 | 42798 S465z00  | Closed traumatic dislocation of knee not otherwise specified |
| 15 | 29911 S4F..00  | Fracture-dislocation or subluxation knee                     |
| 16 | 36448 S024.11  | Fracture of upper jaw, closed                                |
| 17 | 96514 S110800  | Cls spinal fracture with anterior cervcl cord lesion, C5-7   |
| 18 | 63085 7K1G500  | Primary open reduction of fracture and functional bracing    |
| 19 | 63788 SD3z.00  | Superficial injury of lower arm NOS, infected                |
| 20 | 68660 S023400  | Open fracture of mandible, ramus, unspecified                |
| 21 |                |                                                              |
| 22 | 5354 S240400   | Closed fracture pisiform                                     |
| 23 | 41001 S490.12  | Closed dislocation of neck                                   |
| 24 |                |                                                              |
| 25 | 58822 SH41z00  | Superficial burn of the wrist or hand NOS                    |
| 26 | 8053 SD...11   | Abrasions                                                    |
| 27 | 65946 7G2C700  | Escharotomy of burnt skin of head                            |
| 28 | 103914 SC20100 | Sequelae of injury to brain                                  |
| 29 | 27699 S260E00  | Closed fracture finger proximal phalanx, base                |
| 30 | 45669 SJ5..12  | Shoulder girdle peripheral nerve injury                      |
| 31 | 58718 SJ6..12  | Pelvic girdle peripheral nerve injury                        |
| 32 | 36893 7K1LW00  | Primary closed reduction of fracture and skin traction       |
| 33 | 58699 S932700  | Mallet thumb with open tendon injury                         |
| 34 | 51151 SF20.00  | Crush injury, shoulder and upper arm                         |
| 35 | 58642 S30x.00  | Open fracture of unspecified proximal femur                  |
| 36 | 58640 7K6GF00  | Closed reduction of dislocation of lower limb                |
| 37 | 37609 S01..16  | Orbital roof fracture                                        |
| 38 | 25284 S1z..00  | Fracture of neck and trunk NOS                               |
| 39 | 29126 SE23113  | Contusion of pelvic region                                   |
| 40 |                |                                                              |
| 41 | 58732 SH42400  | Superficial partial thickness burn of thumb and finger(s)    |
| 42 | 53357 SH92000  | Superficial partial thickness burn NOS                       |
| 43 | 18485 SJ7..00  | Injury to other nerves                                       |
| 44 | 58031 SD2z.00  | Superficial injury of shoulder and upper arm NOS, infected   |
| 45 | 64027 S260600  | Closed fracture thumb proximal phalanx, neck                 |
| 46 | 58025 S84z.00  | Open wound of neck NOS                                       |
| 47 | 58019 SH43.11  | Third degree burn of finger                                  |
| 48 | 24276 S30w.00  | Closed fracture of unspecified proximal femur                |
| 49 | 39893 S4H1300  | Open fracture-dislocation, metatarsophalangeal joint, single |
| 50 | 71113 S780211  | Bile duct injury without open wound into cavity              |
| 51 | 51144 S860.00  | Open wound of back, uncomplicated                            |
| 52 | 70462 S734400  | Sigmoid colon injury without open wound into cavity          |
| 53 | 73611 S112z00  | Closed fracture of thoracic spine with cord lesion NOS       |
| 54 | 24621 S23x200  | Closed fracture of ulna (alone), unspecified                 |
| 55 | 102718 S013z00 | Open #skull bse + intracranial injury + concussion unspec    |
| 56 | 54727 S85X.00  | Open wound of thorax, part unspecified                       |
| 57 |                |                                                              |
| 58 |                |                                                              |
| 59 |                |                                                              |
| 60 |                |                                                              |

|    |                |                                                              |
|----|----------------|--------------------------------------------------------------|
| 1  |                |                                                              |
| 2  | 67484 SB42100  | Open injury, femoral vein                                    |
| 3  | 57644 S030.00  | Closed fracture of skull NOS without intracranial injury     |
| 4  | 69728 S361100  | Open fracture middle phalanx, toe                            |
| 5  | 40795 S713.00  | Open injury of lung                                          |
| 6  |                |                                                              |
| 7  | 57559 SF03.00  | Crushing injury of skull                                     |
| 8  | 57557 S73x100  | Pancreas head injury without open wound into cavity          |
| 9  | 34737 S231700  | Open fracture radial neck                                    |
| 10 | 5953 SE02.00   | Contusion, nose                                              |
| 11 | 57439 S331z00  | Open fracture of tibia and fibula, proximal NOS              |
| 12 |                |                                                              |
| 13 | 36103 SH22900  | Deep partial thickness burn of the chest wall                |
| 14 | 64742 SD30300  | Abrasion wrist, dorsum                                       |
| 15 | 57402 SB41100  | Open injury, superficial femoral artery                      |
| 16 | 22137 S440300  | Closed traumatic dislocation, distal interphalangeal joint   |
| 17 | 44715 S200000  | Closed fracture of clavicle, unspecified part                |
| 18 |                |                                                              |
| 19 | 98016 7J41200  | Posterior decompression of fracture of spine                 |
| 20 | 101840 S331A00 | Open fracture tibial plateau                                 |
| 21 | 28739 S220400  | Closed fracture proximal humerus, head                       |
| 22 |                |                                                              |
| 23 | 60583 SB45400  | Posterior tibial vein injury                                 |
| 24 | 57239 S781z00  | Other/mult abdominal organ injury with open wnd to cavity    |
| 25 | 57223 SR16000  | Closed fracture inv thorax wth low back and pelvis and limbs |
| 26 | 70410 TN71.00  | Injury ?accidental, fall from other man-made structure       |
| 27 | 40510 SD31z00  | Abrasion or friction burn of lower arm, infected, NOS        |
| 28 | 28197 S261R00  | Open fracture finger distal phalanx                          |
| 29 |                |                                                              |
| 30 | 69756 SH73100  | Burn of the small intestine                                  |
| 31 | 29981 S4F4.00  | Closed fracture-dislocation, patello-femoral joint           |
| 32 | 12612 S86..00  | Open wound of back                                           |
| 33 | 56975 S421200  | Open traumatic dislocation elbow joint, posterior            |
| 34 | 48050 SA22.00  | Open wound of foot with tendon involvement                   |
| 35 | 17490 SF10112  | Crush injury of testis                                       |
| 36 |                |                                                              |
| 37 | 44619 SH53.00  | Full thickness burn of the leg                               |
| 38 | 63868 S712100  | Lung contusion without mention of open wound into thorax     |
| 39 | 56881 SH45.11  | Deep third degree burn of finger with loss of a body part    |
| 40 | 56877 TN5z.00  | Injury ?accidental, by firearm or explosive NOS              |
| 41 |                |                                                              |
| 42 | 95148 SB2z.00  | Injury to abdominal and pelvic blood vessel NOS              |
| 43 | 51988 SJ32200  | Lumbar nerve root injury - L3                                |
| 44 | 35018 S135z00  | Other/multiple open fracture of pelvis NOS                   |
| 45 | 31836 TN1..00  | Injury ?accidental, poisoning by gases in domestic use       |
| 46 | 5929 S2...11   | Arm fracture                                                 |
| 47 |                |                                                              |
| 48 | 56638 S630.00  | Other cerebral h'ge after injury no open intracranial wound  |
| 49 | 56599 S4H0000  | Closed fracture-dislocation, subtalar joint                  |
| 50 | 99019 S011000  | Closed #skull bse + intracranial inj, unspec state of consc  |
| 51 | 56574 SJ02.00  | Optic pathway injury                                         |
| 52 | 40695 SJ13.00  | Abducens (6th) nerve injury                                  |
| 53 |                |                                                              |
| 54 | 56532 S82w300  | Open wound of cochlea with complication                      |
| 55 | 100286 S723000 | Open injury of bronchus                                      |
| 56 | 56523 SH21000  | Superficial burn of unspecified part of the trunk            |
| 57 | 4225 S024000   | Closed fracture maxilla                                      |
| 58 |                |                                                              |
| 59 | 68262 S4C3600  | Open fracture-subluxation peri-lunate trans-scaploid         |
| 60 | 27591 S234z00  | Closed fracture of forearm, lower end, NOS                   |
|    | 9873 SA...11   | Open wound of leg                                            |

|    |                |                                                             |
|----|----------------|-------------------------------------------------------------|
| 1  |                |                                                             |
| 2  | 57369 SF02100  | Crush injury, larynx                                        |
| 3  | 30275 SE24400  | Contusion, vagina                                           |
| 4  | 25946 SH0..13  | Eyelid burns                                                |
| 5  | 107020 SD2z100 | Superficial injury of scapular region NOS, infected         |
| 6  | 63610 S771000  | Open injury of bladder                                      |
| 7  | 62978 SH42D00  | Deep partial thickness burn of the palm of hand             |
| 8  | 20930 SJ71.00  | Injury of peripheral nerves of neck                         |
| 9  | 31847 S362100  | Open fracture of great toe                                  |
| 10 | 94088 SJ66000  | Injury of multiple nerves at lower leg level                |
| 11 | 57196 S4F3.00  | Open fracture-subluxation, knee joint                       |
| 12 | 29164 S33y000  | Open fracture of tibia, unspecified part, NOS               |
| 13 | 47593 S851.00  | Open wound of chest wall with complication                  |
| 14 | 71084 SH34500  | Deep full thickness burn of shoulder, no loss of body part  |
| 15 | 32348 S224400  | Closed fracture of distal humerus, condyle(s) unspecified   |
| 16 | 12542 S47..12  | Dislocation of talus                                        |
| 17 | 17286 S241100  | Open fracture of the scaphoid                               |
| 18 | 48472 S780212  | Gallbladder injury without open wound into cavity           |
| 19 | 72540 SH44.12  | Deep third degree burn of hand, without loss of a body part |
| 20 | 25470 S920000  | Open wound of hand, palm                                    |
| 21 | 4851 S440.00   | Closed traumatic dislocation digit                          |
| 22 | 53034 SH42F00  | Deep partial thickness burn of wrist                        |
| 23 | 94649 S130100  | Closed fracture acetabulum, posterior lip alone             |
| 24 | 55777 SD01100  | Abrasion of neck, infected                                  |
| 25 | 31630 SA11100  | Open wound of lower leg with complication                   |
| 26 | 35889 7J13200  | Closed reduction of fracture of maxilla NEC                 |
| 27 | 65228 S335100  | Open fracture distal tibia, intra-articular                 |
| 28 | 68765 S241200  | Open fracture lunate                                        |
| 29 | 54362 N226.12  | Nontraumatic tendon dislocation                             |
| 30 | 55444 SA01100  | Open wound of thigh with complication                       |
| 31 | 55531 S02x200  | Fracture of palate, closed                                  |
| 32 | 6303 S640111   | Minor head injury                                           |
| 33 | 55447 7K1H200  | Secondary open reduction of intraarticular fracture of bone |
| 34 | 71059 S490112  | Closed dislocation of first cervical vertebra (C1)          |
| 35 | 51018 S118.00  | Closed fracture of coccyx with spinal cord lesion           |
| 36 | 55435 SA03100  | Degloving injury, thigh                                     |
| 37 | 42704 E2A2.12  | Post-head injury syndrome                                   |
| 38 | 95728 S4H2400  | Closed fracture-subluxation, IPJ, single toe                |
| 39 | 55417 SD6zz00  | Superficial injury of lower limb, infected, NOS             |
| 40 | 11235 S834.00  | Open wound of face                                          |
| 41 | 66853 S281.00  | Open ill-defined fractures of upper limb                    |
| 42 | 39775 SE05.12  | Bruise of auricle                                           |
| 43 | 21263 SE05.11  | Bruise of ear                                               |
| 44 | 62743 S003z00  | Open skull vlt with intracranial injury + concussion unspec |
| 45 | 71710 SB0yz00  | Other head and neck blood vessel injury NOS                 |
| 46 | 55212 S4C0600  | Closed fracture-dislocation peri-lunate trans-scapoid       |
| 47 | 31076 S496700  | Closed traumatic dislocation costo-chondral joint           |
| 48 | 15578 S77..00  | Injury to pelvic organs                                     |
| 49 | 64417 S713000  | Lung injury with open wound into thorax, unspecified        |
| 50 | 54977 SH23300  | Full thickness burn of the abdominal wall                   |
| 51 | 6069 7K1LH00   | Closed reduction of fracture of finger                      |

|    |                |                                                             |
|----|----------------|-------------------------------------------------------------|
| 1  |                |                                                             |
| 2  | 12406 S10B.00  | Fracture of lumbar spine and pelvis                         |
| 3  | 97971 S303300  | Open fracture proximal femur, intertrochanteric, comminuted |
| 4  | 50781 S261z00  | Open fracture of one or more phalanges of hand NOS          |
| 5  | 64113 S261G00  | Open fracture finger proximal phalanx, neck                 |
| 6  | 52362 SA23200  | Degloving injury heel                                       |
| 7  |                |                                                             |
| 8  | 1563 SJ7z.00   | Injury to other nerve NOS                                   |
| 9  | 48213 SH52000  | Superficial partial thickness burn of the leg, unspecified  |
| 10 | 45529 S313000  | Open fracture distal femur, unspecified                     |
| 11 | 65084 S135.00  | Other or multiple open fracture of pelvis                   |
| 12 |                |                                                             |
| 13 | 109693 7K6Gy00 | Primary closed reduction of traumatic joint dislocation OS  |
| 14 | 7754 S225.11   | Elbow fracture - open                                       |
| 15 | 9223 S42z.00   | Dislocation of elbow NOS                                    |
| 16 | 63899 S225500  | Open fracture of distal humerus, trochlea                   |
| 17 | 22856 SH5..11  | Leg burns                                                   |
| 18 |                |                                                             |
| 19 | 35823 SH31500  | Superficial burn of the shoulder                            |
| 20 | 66809 SJ50100  | Open injury, axillary nerve                                 |
| 21 | 54673 SJ6x200  | Closed injury pudendal nerve                                |
| 22 | 14963 SH10300  | Unspecified thickness burn of the lip(s)                    |
| 23 | 54646 SB45100  | Anterior tibial artery injury, unspecified                  |
| 24 |                |                                                             |
| 25 | 60163 S225200  | Open fracture distal humerus, lateral condyle               |
| 26 | 99566 TK01100  | Suicide and self inflicted injury by Barbitone              |
| 27 | 28033 7K6FA00  | Primary open reduction of dislocation and wire fixation     |
| 28 | 53707 Q416100  | Perinatal cutaneous bruising                                |
| 29 | 73786 SR10000  | Closed fractures involving head with neck                   |
| 30 |                |                                                             |
| 31 | 51861 S300311  | Closed fracture, base of neck of femur                      |
| 32 | 33719 S450000  | Closed traumatic dislocation of hip, unspecified            |
| 33 | 54361 SB24200  | Renal vein injury                                           |
| 34 | 64455 S735400  | Sigmoid colon injury with open wound into cavity            |
| 35 | 39325 SJ33.00  | Sacral nerve root injury                                    |
| 36 |                |                                                             |
| 37 | 54280 S330200  | Closed fracture of tibia and fibula, proximal               |
| 38 | 71953 S211600  | Open fracture scapula, neck                                 |
| 39 | 54242 S312600  | Closed fracture distal femur, bicondylar (T-Y fracture)     |
| 40 | 62833 S224x00  | Closed fracture of distal humerus, multiple                 |
| 41 |                |                                                             |
| 42 | 101318 S103500 | Open fracture thoracic vertebra, posterior arch             |
| 43 | 23829 SF10000  | Crush injury, penis                                         |
| 44 | 20411 SE12.00  | Contusion, orbital tissues                                  |
| 45 | 47830 S490200  | Closed dislocation atlanto-axial joint                      |
| 46 | 47384 SJ12.11  | Fifth cranial nerve injury                                  |
| 47 | 66233 S233100  | Open fracture of the radial shaft                           |
| 48 |                |                                                             |
| 49 | 29145 S302200  | Closed fracture proximal femur, subtrochanteric             |
| 50 | 54123 S261W00  | Open fracture finger distal phalanx, multiple               |
| 51 | 54121 S870.00  | Open wound of buttock, uncomplicated                        |
| 52 | 54073 SJ6..11  | Leg peripheral nerve injury                                 |
| 53 |                |                                                             |
| 54 | 38502 SJ5C.00  | Posterior interosseous nerve injury                         |
| 55 | 67669 S135600  | Open fracture pelvis, iliac wing                            |
| 56 | 6189 SH3..00   | Burn of the arm (excluding wrist and hand)                  |
| 57 | 51147 7J13500  | Reduction of Le Fort 2 fracture of maxilla                  |
| 58 | 49492 S93..11  | Open wound of fingernail                                    |
| 59 | 37407 SH51200  | Superficial burn of the foot                                |
| 60 | 109408 SJ41300 | Inferior mesenteric plexus injury                           |



|    |                |                                                              |
|----|----------------|--------------------------------------------------------------|
| 1  |                |                                                              |
| 2  | 35844 SD1..00  | Superficial injury of trunk                                  |
| 3  | 31850 S490300  | Closed dislocation C2/C3                                     |
| 4  | 11999 SH1..11  | Face burns                                                   |
| 5  | 28875 S352J00  | Closed fracture of base of fifth metatarsal                  |
| 6  | 423 S45..00    | Dislocation or subluxation of hip                            |
| 7  |                |                                                              |
| 8  | 10615 SD10100  | Abrasion, chest wall                                         |
| 9  | 44374 SB3z.00  | Arm blood vessel injury NOS                                  |
| 10 | 19403 S240B00  | Closed fracture scaphoid, waist, transverse                  |
| 11 | 15629 TG80100  | Accidental burning/scalding caused by boiling liquid, unspec |
| 12 | 65541 SH42.14  | Second degree burn of thumb                                  |
| 13 | 38013 SH12z00  | Partial thickness burn of the face, head or neck NOS         |
| 14 | 52067 S253.00  | Open fracture sesamoid bone of hand                          |
| 15 | 16494 S120100  | Closed fracture of one rib                                   |
| 16 | 94584 S117300  | Open fracture of sacrum with other spinal cord injury        |
| 17 | 36860 S912z00  | Open wound of lower arm with tendon involvement, NOS         |
| 18 | 28179 S200z00  | Closed fracture of clavicle NOS                              |
| 19 | 99516 S102500  | Closed fracture thoracic vertebra, posterior arch            |
| 20 | 68932 S465300  | Closed traumatic dislocation knee joint, medial              |
| 21 | 71452 S121900  | Open fracture multiple ribs                                  |
| 22 | 67752 SH80000  | Burn:<10% of body surface, 10%/unspec BS full thickness      |
| 23 | 59420 S496400  | Closed traumatic dislocation, sterno-clavicular joint, post  |
| 24 | 105699 S61yz00 | Brain cont + open intracranial wound + concussion unspec     |
| 25 | 44249 SJ70.00  | Head and neck superficial nerve injury                       |
| 26 | 6917 S336.00   | Fracture of upper end of tibia                               |
| 27 | 53364 SD31100  | Abrasion of forearm, infected                                |
| 28 | 58074 SH42700  | Superficial partial thickness burn of the wrist              |
| 29 | 53356 SH11x00  | Superficial burn of multiple sites of the face, head or neck |
| 30 | 66915 TK5..00  | Suicide and selfinflicted injury by firearms and explosives  |
| 31 | 30124 S835.00  | Open wound of face with complication                         |
| 32 | 60706 SB42000  | Closed injury, femoral vein                                  |
| 33 | 8613 S10B600   | Multiple fractures of lumbar spine and pelvis                |
| 34 | 280 S120.00    | Closed fracture rib                                          |
| 35 | 50654 S23x000  | Closed fracture of forearm, unspecified                      |
| 36 | 8266 S104100   | Closed fracture lumbar vertebra, wedge                       |
| 37 | 69652 SD0z100  | Superficial injury of neck NOS, infected                     |
| 38 | 11327 SF3..00  | Crush injury, lower limb                                     |
| 39 | 52968 S63..00  | Other cerebral haemorrhage following injury                  |
| 40 | 46443 SJ20.00  | Cervical cord injury without evidence of spinal bone injury  |
| 41 | 27783 S4C0300  | Closed fracture-dislocation, carpometacarpal joint           |
| 42 | 52934 SH42z00  | Partial thickness burn of the wrist or hand NOS              |
| 43 | 31012 SQ...00  | Open wounds involving multiple body regions                  |
| 44 | 10661 SD1y200  | Superficial injury of breast NOS, without major open wound   |
| 45 | 72138 S301100  | Open fracture proximal femur, transepiphyseal                |
| 46 | 42149 S100C00  | Closed fracture axis, spinous process                        |
| 47 | 52845 SH42900  | Deep partial thickness burn of a single finger               |
| 48 | 96438 S4D3600  | Open fracture-subluxation multiple digits                    |
| 49 | 5682 S62..00   | Cerebral haemorrhage following injury                        |
| 50 | 52809 SF30300  | Open crush injury, thigh                                     |
| 51 | 100251 SH32D00 | Deep partial thickness burn of the scapular region           |
| 52 | 59411 S4G2.00  | Closed fracture-subluxation, ankle joint                     |

|    |                |                                                              |
|----|----------------|--------------------------------------------------------------|
| 1  |                |                                                              |
| 2  | 59077 SB34.00  | Palmar artery injury                                         |
| 3  | 28342 S804.00  | Penetrating wound of orbit with foreign body                 |
| 4  | 62288 S495.00  | Open dislocation of other vertebra                           |
| 5  | 30669 S85..00  | Open wound of chest wall                                     |
| 6  | 23758 S7...12  | Internal injury of abdomen                                   |
| 7  |                |                                                              |
| 8  | 45923 SJ14.11  | Seventh cranial nerve injury                                 |
| 9  | 5995 SD60.00   | Abrasion/friction burn of lower limb, without infection      |
| 10 | 52620 TG8y400  | Accidental burning or scalding caused by plastic             |
| 11 | 41935 SJ80.00  | Concussion and oedema of cervical spinal cord                |
| 12 |                |                                                              |
| 13 | 73288 SH73z00  | Burn of the gastrointestinal tract NOS                       |
| 14 | 52499 S330800  | Closed fracture fibula, head                                 |
| 15 | 436 S42..00    | Dislocation or subluxation of elbow                          |
| 16 | 52450 SD0z.00  | Superficial injury of face/neck/scalp NOS, infected          |
| 17 | 34077 S49G.00  | Dislocation of septal cartilage of nose                      |
| 18 |                |                                                              |
| 19 | 32011 S025000  | Open fracture maxilla                                        |
| 20 | 59497 S84x100  | Open wound of supraclavicular region                         |
| 21 | 33593 S01z.00  | Fracture of base of skull NOS                                |
| 22 | 33695 S260T00  | Closed fracture finger distal phalanx, shaft                 |
| 23 | 106895 S741.00 | Open injury of liver                                         |
| 24 |                |                                                              |
| 25 | 24686 SH23100  | Full thickness burn of the breast                            |
| 26 | 12835 SA13.00  | Degloving injury, knee or leg or ankle                       |
| 27 | 34839 SD7..00  | Superficial injury of foot and toe(s)                        |
| 28 | 94477 S780000  | Intra-abdominal organ injury no open wnd into cavity, unspec |
| 29 | 37263 N083612  | Patella-recurrent dislocation                                |
| 30 |                |                                                              |
| 31 | 52321 SH23200  | Full thickness burn of the chest wall                        |
| 32 | 41287 S320400  | Closed fracture patella, comminuted (stellate)               |
| 33 | 91658 7J41400  | Posterior decompression of fracture of spine NEC             |
| 34 | 52300 S110.00  | Closed fracture of cervical spine with cord lesion           |
| 35 | 54590 SH40700  | Unspecified thickness burn of the wrist                      |
| 36 |                |                                                              |
| 37 | 48931 S730.00  | Stomach injury without mention of open wound into cavity     |
| 38 | 2630 S33..00   | Fracture of tibia and fibula                                 |
| 39 | 7660 S230700   | Closed fracture radius, neck                                 |
| 40 | 39816 S102000  | Closed fracture thoracic vertebra, burst                     |
| 41 | 71567 S125.00  | Closed fracture larynx and trachea                           |
| 42 |                |                                                              |
| 43 | 43600 7J42400  | Halo skull traction for fracture of spine                    |
| 44 | 40643 S134000  | Closed fracture of ilium, unspecified                        |
| 45 | 8015 7K6GB00   | Closed reduction of dislocation of patella                   |
| 46 | 109464 SH21x00 | Superficial burn of multiple sites of the trunk              |
| 47 | 51682 S602.00  | Concussion with 1-24 hours loss of consciousness             |
| 48 | 96534 TN30.00  | Injury ?accidental, hanging                                  |
| 49 |                |                                                              |
| 50 | 45224 N083200  | Recurrent joint dislocation, of the upper arm                |
| 51 | 40653 S4F0.00  | Closed fracture-dislocation, knee joint                      |
| 52 | 61374 S231500  | Open fracture of the proximal ulna                           |
| 53 |                |                                                              |
| 54 | 103251 SB23z00 | Portal and splenic vein injury NOS                           |
| 55 | 41801 S480800  | Closed traumatic dislocation toe, IPJ, multiple              |
| 56 | 10937 S834200  | Open wound of forehead                                       |
| 57 | 44598 SJ41000  | Coeliac ganglion injury                                      |
| 58 | 8800 7K1L600   | Closed reduction of fracture of knee                         |
| 59 | 19189 S10A200  | Multiple fractures of cervical spine                         |
| 60 | 104011 SB44400 | Closed injury, popliteal vein                                |



|    |               |                                                              |
|----|---------------|--------------------------------------------------------------|
| 1  |               |                                                              |
| 2  | 51754 SK1x600 | Injury of multiple intra-abdominal organs                    |
| 3  | 56124 S771100 | Open injury of urethra                                       |
| 4  | 22144 7K6GN00 | Closed reduction fracture disloc joint & internal fixation   |
| 5  | 93834 S78z.00 | Other intra-abdominal organ injury, NOS                      |
| 6  | 61388 S03..00 | Other and unqualified skull fractures                        |
| 7  | 33808 S232z00 | Closed fracture of radius and ulna, shaft, NOS               |
| 8  | 33883 S230900 | Closed fracture of the proximal radius                       |
| 9  | 55999 7K6GU00 | Primary closed reduction of dislocation+fixation by wire(s)  |
| 10 | 47711 SB48000 | Injury of dorsal vein of foot                                |
| 11 | 28172 S82z.00 | Open wound of ear NOS                                        |
| 12 | 59943 S221500 | Open fracture of humerus, upper epiphysis                    |
| 13 | 93068 SA01000 | Open wound of hip with complication                          |
| 14 | 8112 SH...00  | Burns                                                        |
| 15 | 28393 S224800 | Closed fracture distal humerus, capitellum                   |
| 16 | 6002 TGyz300  | Accidental injury NOS                                        |
| 17 | 69409 SH43z00 | Full thickness burn of the wrist or hand NOS                 |
| 18 | 62841 S001600 | Closed #skull vlt + intracranial injury, LOC unspc duration  |
| 19 | 35121 SD06200 | Splinter of scalp, without major open wound                  |
| 20 | 17922 S4C0000 | Closed fracture-dislocation distal radio-ulnar joint         |
| 21 | 62853 S251000 | Open fracture of metacarpal bone(s), site unspecified        |
| 22 | 28293 S234E00 | Closed fracture distal radius, intra-articular, other type   |
| 23 | 5952 SE41100  | Contusion, knee                                              |
| 24 | 72434 SH85.00 | Burn involving 50-59% of body surface (BS)                   |
| 25 | 15622 7J42500 | Spinal traction for fracture of spine NEC                    |
| 26 | 51170 S313.00 | Open fracture distal femur                                   |
| 27 | 11161 S028300 | Fracture of mandible                                         |
| 28 | 69156 S711000 | Heart injury with open wound into thorax, unspecified        |
| 29 | 66769 SF02z00 | Crush injury, neck NOS                                       |
| 30 | 98393 S100800 | Closed fracture atlas, isolated arch or articular process    |
| 31 | 5280 S028000  | Fracture of nasal bones                                      |
| 32 | 27654 S100600 | Closed fracture of sixth cervical vertebra                   |
| 33 | 25129 SH40100 | Unspecified thickness burn of a single finger                |
| 34 | 10454 S47..00 | Dislocation or subluxation of ankle                          |
| 35 | 53689 S234911 | Closed volar Barton's fracture-dislocation                   |
| 36 | 48722 SH20.00 | Unspecified thickness burn of the trunk                      |
| 37 | 70864 S201000 | Open fracture of clavicle, unspecified part                  |
| 38 | 50795 SB33.00 | Ulnar blood vessel injury                                    |
| 39 | 48654 S77v400 | Vas deferens injury without open wound into cavity           |
| 40 | 28108 S912.11 | Open wound of lower arm with tendon injury                   |
| 41 | 27745 SE33.00 | Contusion, finger                                            |
| 42 | 50756 SH34100 | Deep full thickness burn of forearm, no loss of body part    |
| 43 | 50749 S133.00 | Open fracture of pubis                                       |
| 44 | 97720 SH81000 | Burn: 10-14% of body surface, <10%/unsp BS full thickness    |
| 45 | 92354 S040.00 | Mult #skull/face+other bones, closed, no intracranial injury |
| 46 | 2864 S640.00  | Intracranial injury NOS no open intracranial wound           |
| 47 | 50652 TG81z00 | Accidental burning caused by caustic or corrosive NOS        |
| 48 | 34080 S260900 | Closed fracture thumb distal phalanx, base                   |
| 49 | 93916 SD1z700 | Superficial injury of flank NOS, infected                    |
| 50 | 19962 SE2z.00 | Contusion, trunk NOS                                         |
| 51 | 42874 S430700 | Closed traumatic dislocation peri-lunate (dorsal)            |

|    |                |                                                             |
|----|----------------|-------------------------------------------------------------|
| 1  |                |                                                             |
| 2  | 101960 SJ34500 | Open injury, brachial plexus, all roots (complete)          |
| 3  | 50549 S320100  | Closed fracture patella, proximal pole                      |
| 4  | 53856 SF31300  | Closed crush injury, knee                                   |
| 5  | 19309 S814.00  | Eye laceration, unspecified                                 |
| 6  | 14878 S024.00  | Fracture of malar or maxillary bones, closed                |
| 7  | 50502 TN00.00  | Injury ?accidental, poisoning by analgesic or anti-pyretic  |
| 8  | 60487 S4D2200  | Closed fracture-subluxation IPJ, unspecified                |
| 9  | 105695 S105400 | Open fracture lumbar vertebra, transverse process           |
| 10 | 53684 SB21.00  | Inferior vena cava injury                                   |
| 11 | 73426 S223z00  | Open fracture of humerus, shaft or unspecified part NOS     |
| 12 | 40533 S120200  | Closed fracture of two ribs                                 |
| 13 | 29982 S47..11  | Dislocation of fibula, distal end                           |
| 14 | 28279 S440z00  | Closed traumatic dislocation of finger NOS                  |
| 15 | 11969 S128.00  | Fracture of sternum                                         |
| 16 | 102256 SB47000 | Injury of peroneal artery                                   |
| 17 | 50345 S77w400  | Vas deferens injury with open wound into cavity             |
| 18 | 23860 SH92.11  | Second degree burn                                          |
| 19 | 66765 S000300  | Closed #skull vlt no intracranial injury, 1-24hr loss consc |
| 20 | 49298 S810.00  | Ocular laceration without intraocular prolapse              |
| 21 | 17870 SE13.00  | Contusion, eyeball                                          |
| 22 | 68031 S779.00  | Injury of ovary                                             |
| 23 | 66576 7G2CA00  | Escharotomy of burnt skin of arm                            |
| 24 | 41982 SA00000  | Open wound of hip                                           |
| 25 | 99376 S116z00  | Closed fracture of sacrum with spinal cord lesion NOS       |
| 26 | 31999 S240800  | Closed fracture hamate                                      |
| 27 | 71976 SA11z00  | Open wound of knee/leg/ankle with complication, NOS         |
| 28 | 98681 S235111  | Smith's fracture - open                                     |
| 29 | 43331 S780.00  | Closed injury other intra-abdominal structure               |
| 30 | 989 S89z.00    | Other open wounds NOS                                       |
| 31 | 52305 S251300  | Open fracture finger metacarpal shaft                       |
| 32 | 29332 N331y00  | Other specified pathological fracture                       |
| 33 | 8670 SE33100   | Contusion, thumb                                            |
| 34 | 50517 S361000  | Open fracture proximal phalanx, toe                         |
| 35 | 20668 TN7..00  | Injury ?accidental, fall from high place                    |
| 36 | 37416 SD00.11  | Abrasion or friction burn of head without infection         |
| 37 | 58752 S4B2.00  | Closed fracture-subluxation elbow                           |
| 38 | 102046 S261V00 | Open fracture finger distal phalanx, mallet                 |
| 39 | 32812 SK1C500  | Injury of multiple muscles and tendons at forearm level     |
| 40 | 49826 SC04.00  | Late effect of other fracture of leg                        |
| 41 | 49821 S353300  | Open fracture cuboid                                        |
| 42 | 25132 SB0y000  | External jugular vein injury                                |
| 43 | 49798 S331700  | Open fracture tubercle, tibia                               |
| 44 | 35425 SD20200  | Abrasion, axillary area                                     |
| 45 | 49745 SA02.11  | Open wound of hip and thigh with tendon injury              |
| 46 | 70859 S731.00  | Stomach injury with open wound into cavity                  |
| 47 | 17491 SE2..00  | Contusion, trunk                                            |
| 48 | 59868 S712z00  | Lung injury without mention of open wound into thorax NOS   |
| 49 | 49623 SA13000  | Degloving injury, knee                                      |
| 50 | 70407 S740.00  | Closed injury of liver                                      |
| 51 | 49594 SH51000  | Superficial burn of the leg, unspecified                    |
| 52 |                |                                                             |
| 53 |                |                                                             |
| 54 |                |                                                             |
| 55 |                |                                                             |
| 56 |                |                                                             |
| 57 |                |                                                             |
| 58 |                |                                                             |
| 59 |                |                                                             |
| 60 |                |                                                             |

|    |               |                                                             |
|----|---------------|-------------------------------------------------------------|
| 1  |               |                                                             |
| 2  | 868 S4...13   | Fracture dislocations and fracture subluxations             |
| 3  | 5951 7K1LM00  | Closed reduction of fracture of wrist                       |
| 4  | 41138 S102z00 | Closed fracture thoracic vertebra not otherwise specified   |
| 5  | 49529 7J42200 | Manipulative reduction of fracture of spine                 |
| 6  | 28413 S240300 | Closed fracture triquetral                                  |
| 7  | 62827 S837z00 | Open wound in mouth with complication, NOS                  |
| 8  | 30391 7J18200 | Reduction of dislocation of temporomandibular joint         |
| 9  | 33971 SF21.00 | Crush injury elbow or forearm                               |
| 10 | 11476 SA13100 | Degloving injury, lower leg                                 |
| 11 | 45872 SA12.00 | Open wound of knee, leg and ankle with tendon involvement   |
| 12 | 53566 S131.00 | Open fracture acetabulum                                    |
| 13 | 49259 SD0y200 | Superficial injury of scalp NOS                             |
| 14 | 33518 N083L00 | Habitual dislocation of the shoulder                        |
| 15 | 70886 SA13200 | Degloving injury, ankle                                     |
| 16 | 47774 SB41.00 | Superficial femoral artery injury                           |
| 17 | 12613 SK1E.00 | Injury of muscle and tendon at lower leg level              |
| 18 | 63253 S103.00 | Open fracture thoracic vertebra                             |
| 19 | 58717 SJ35000 | Closed injury sacral plexus                                 |
| 20 | 41707 S022500 | Closed fracture of mandible, angle of jaw                   |
| 21 | 61396 SB3x000 | Injury of multiple blood vessels at forearm level           |
| 22 | 48942 SD3yz00 | Superficial injury of lower arm, without infection NOS      |
| 23 | 61514 S735500 | Rectum injury with open wound into cavity                   |
| 24 | 65309 TK54.00 | Suicide and selfinflicted injury by other firearm           |
| 25 | 31764 N082400 | Pathological dislocation of the hand                        |
| 26 | 51924 SJ44.00 | Iliolumbar nerve injury                                     |
| 27 | 57978 SJ1z.00 | Injury to other cranial nerve NOS                           |
| 28 | 70486 S221400 | Open fracture proximal humerus, head                        |
| 29 | 70684 SH12B00 | Deep partial thickness burn of the ear                      |
| 30 | 50267 S739.00 | Injury of rectum                                            |
| 31 | 60518 S233000 | Open fracture of radius, shaft, unspecified                 |
| 32 | 8243 S305.00  | Subtrochanteric fracture                                    |
| 33 | 48817 SJ11.00 | Trochlear (4th) nerve injury                                |
| 34 | 73824 S241B00 | Open fracture scaphoid, waist, transverse                   |
| 35 | 45934 SR11.00 | Fractures involving thorax with lower back and pelvis       |
| 36 | 44800 SH42200 | Superficial partial thickness burn of the thumb             |
| 37 | 60343 S4C3000 | Open fracture-subluxation, distal radio-ulnar joint         |
| 38 | 38844 S903.00 | Degloving injury, shoulder or upper arm                     |
| 39 | 203 S234.11   | Wrist fracture - closed                                     |
| 40 | 16220 SD9y.00 | Other superficial injury, without mention of infection, NOS |
| 41 | 48695 SB47200 | Injury of lesser saphenous vein at lower leg level          |
| 42 | 66341 SC1..00 | Late effect of skin and subcutaneous tissue injury          |
| 43 | 28478 SF02000 | Crush injury, throat, unspecified                           |
| 44 | 1857 S354.00  | Fracture of calcaneus                                       |
| 45 | 31761 S41..11 | Dislocation of humerus                                      |
| 46 | 54238 SH22500 | Superficial partial thickness burn of the buttock           |
| 47 | 48635 S420200 | Closed traumatic dislocation elbow joint, posterior         |
| 48 | 50080 SB14.00 | Innominate (brachiocephalic) vein injury                    |
| 49 | 48596 S722200 | Closed injury of pleura                                     |
| 50 | 72822 S4H2600 | Closed fracture-subluxation, IPJ, multiple toes             |
| 51 | 48540 SAA..00 | Open wounds involving multiple regions of lower limb(s)     |

|    |                |                                                             |
|----|----------------|-------------------------------------------------------------|
| 1  |                |                                                             |
| 2  | 49801 S331012  | Open fracture of tibial tuberosity                          |
| 3  | 724 SK13111    | Injury arm                                                  |
| 4  | 99151 S101511  | C5 vertebra open fracture without spinal cord lesion        |
| 5  | 18301 S235F00  | Open Barton's fracture                                      |
| 6  | 97064 S013.00  | Open fracture base of skull with intracranial injury        |
| 7  | 17776 S920100  | Open wound of hand, dorsum                                  |
| 8  | 48245 S233300  | Open fracture radius and ulna, middle                       |
| 9  | 48239 S221300  | Open fracture proximal humerus, greater tuberosity          |
| 10 | 73279 SD1z400  | Superficial injury of back NOS, infected                    |
| 11 | 100506 SJ64100 | Open injury cutaneous sensory nerve, leg                    |
| 12 | 71480 SJ53300  | Open injury, radial nerve, sensory branch                   |
| 13 | 48185 S801.00  | Full thickness eyelid laceration no lacrimal passage damage |
| 14 | 66152 SJ31500  | Thoracic nerve root injury - T6                             |
| 15 | 40433 S780400  | Retroperitoneum injury without open wound into cavity       |
| 16 | 35310 S465000  | Closed traumatic dislocation of knee, unspecified           |
| 17 | 51703 S738.00  | Injury of colon                                             |
| 18 | 35260 S150000  | Closed multiple fractures of thoracic spine                 |
| 19 | 4008 S921.00   | Open wound of hand with complication                        |
| 20 | 24074 SJ66.00  | Injury of nerves at lower leg level                         |
| 21 | 2050 SK17.11   | Injury toe                                                  |
| 22 | 19416 SJ30.00  | Cervical nerve root injury                                  |
| 23 | 25539 SH40z00  | Unspecified thickness burn of the wrist or hand NOS         |
| 24 | 30347 SE24z00  | Contusion, genital organs NOS                               |
| 25 | 56433 SH23.00  | Full thickness burn of the trunk                            |
| 26 | 47847 S251z00  | Open fracture of metacarpal bone(s) NOS                     |
| 27 | 42076 S234400  | Closed fracture of ulna, lower epiphysis                    |
| 28 | 33414 SH52.00  | Partial thickness burn of the leg                           |
| 29 | 72455 SJ63100  | Closed injury superficial peroneal nerve                    |
| 30 | 12369 S339100  | Open fracture of distal fibula                              |
| 31 | 7009 S230600   | Closed fracture radius, head                                |
| 32 | 37318 S494.00  | Closed dislocation of other vertebra                        |
| 33 | 25312 7J13300  | Reduction of blowout fracture of orbital floor              |
| 34 | 61581 SH12700  | Superficial partial thickness burn of the forehead          |
| 35 | 22636 S930200  | Open wound, thumb                                           |
| 36 | 50053 S234A00  | Closed dorsal Barton's fracture                             |
| 37 | 34401 SD00100  | Abrasion/friction burn of neck, without infection           |
| 38 | 62850 SH32500  | Superficial partial thickness burn of the shoulder          |
| 39 | 65732 TN21.00  | Injury ?accidental, poisoning by other carbon monoxide      |
| 40 | 27775 S465.00  | Other closed traumatic dislocation of knee                  |
| 41 | 24672 S100700  | Closed fracture of seventh cervical vertebra                |
| 42 | 73057 S430y00  | Other closed traumatic dislocation of wrist                 |
| 43 | 63064 7J03y00  | Other specified reduction of fracture of facial bone        |
| 44 | 47796 SB0y011  | Jugular vein injury NOS                                     |
| 45 | 70657 S713100  | Lung contusion with open wound into thorax                  |
| 46 | 40280 SJ67000  | Injury of lateral plantar nerve                             |
| 47 | 94398 S464000  | Open traumatic dislocation patello-femoral joint, lateral   |
| 48 | 46955 S352900  | Closed fracture talus, neck                                 |
| 49 | 57981 S14z.00  | Fracture of ill-defined bone of trunk NOS                   |
| 50 | 16322 S480400  | Closed traumatic metatarsal dislocation, unspecified        |
| 51 | 46798 S4C3100  | Open fracture-subluxation radiocarpal joint                 |

|    |                |                                                              |
|----|----------------|--------------------------------------------------------------|
| 1  |                |                                                              |
| 2  | 69010 SH32000  | Superficial partial thickness burn of the arm, unspecified   |
| 3  | 97343 SJ5C100  | Open injury, posterior interosseous nerve                    |
| 4  | 67871 SH31x00  | Superficial burn of multiple sites of the arm                |
| 5  | 8375 SD3y200   | Superficial injury of wrist NOS                              |
| 6  |                |                                                              |
| 7  | 42251 SD1y300  | Superficial injury abdom wall NOS, without major open wound  |
| 8  | 46592 S132200  | Closed fracture pelvis, multiple pubic rami - unstable       |
| 9  | 4359 S23x300   | Closed fracture of the radius and ulna                       |
| 10 | 36808 SJB2.00  | Injury of superficial vein at shoulder and upper arm level   |
| 11 | 89228 S913300  | Degloving injury wrist, dorsum                               |
| 12 |                |                                                              |
| 13 | 46482 SB15.00  | Subclavian vein injury                                       |
| 14 | 71940 SB46.00  | Deep plantar blood vessel injury                             |
| 15 | 33854 SD81z00  | Superficial injury of cornea NOS                             |
| 16 | 45180 S420600  | Closed traumatic dislocation superior radio-ulnar joint      |
| 17 | 5586 SE23.00   | Contusion, back                                              |
| 18 |                |                                                              |
| 19 | 33706 S331000  | Open fracture of the proximal tibia                          |
| 20 | 46151 S77C.00  | Injury of multiple pelvic organs                             |
| 21 | 33908 S27..00  | Multiple fractures of hand bones                             |
| 22 | 68085 S241000  | Open fracture of carpal bone, unspecified                    |
| 23 | 93679 S4J0300  | Closed #-dislocation sterno-clavicular joint, posterior      |
| 24 |                |                                                              |
| 25 | 27287 S02x000  | Fracture of alveolus, closed                                 |
| 26 | 33990 S271.00  | Open multiple fractures of hand bones                        |
| 27 | 103210 SH24100 | Deep full thickness burn of breast without loss of body part |
| 28 | 9475 SH1..00   | Burn of the face, head or neck                               |
| 29 |                |                                                              |
| 30 | 19134 SB43.00  | Saphenous vein injury                                        |
| 31 | 41548 S100400  | Closed fracture of fourth cervical vertebra                  |
| 32 | 48759 SD20100  | Abrasion, scapular area                                      |
| 33 | 16031 S770000  | Closed injury of bladder                                     |
| 34 | 50897 SJ16000  | Closed injury, accessory nerve                               |
| 35 | 56525 S346000  | Closed fracture ankle, trimalleolar, low fibular fracture    |
| 36 |                |                                                              |
| 37 | 103524 S4C2200 | Closed fracture-subluxation mid carpal                       |
| 38 | 23821 SK1D.00  | Injury of muscle and tendon at hip and thigh level           |
| 39 | 45374 S260x00  | Closed fractures of phalanx or phalanges, multiple sites     |
| 40 | 31553 SB00300  | Internal carotid artery injury                               |
| 41 | 28376 SH41700  | Superficial burn of the wrist                                |
| 42 | 34334 S933.00  | Degloving injury, finger                                     |
| 43 |                |                                                              |
| 44 | 55687 S211100  | Open fracture scapula, acromion                              |
| 45 | 17462 SF01.00  | Crush injury, scalp                                          |
| 46 | 62832 SJ50000  | Closed injury, axillary nerve                                |
| 47 |                |                                                              |
| 48 | 45826 SH74000  | Burn of the vagina                                           |
| 49 | 45488 SE32400  | Contusion wrist, volar                                       |
| 50 | 28209 S911000  | Open wound of forearm with complication                      |
| 51 | 69470 SF30400  | Closed crush injury, hip                                     |
| 52 | 59333 S491500  | Open dislocation C4/C5                                       |
| 53 |                |                                                              |
| 54 | 10737 82...11  | Closed reduction of fracture                                 |
| 55 | 11493 SD31.00  | Abrasion or friction burn of lower arm, infected             |
| 56 | 40373 SF31000  | Crush injury, lower leg                                      |
| 57 | 67988 TN05.00  | Injury ?accidental, poisoning by drug or medicament NOS      |
| 58 | 61675 S235900  | Open volar Barton's fracture                                 |
| 59 | 60222 SJ31000  | Thoracic nerve root injury - T1                              |
| 60 | 34166 S10z.00  | Fracture of spine without mention of spinal cord lesion NOS  |



|    |               |                                                             |
|----|---------------|-------------------------------------------------------------|
| 1  |               |                                                             |
| 2  | 40697 SH6z.00 | Burn of multiple specified sites NOS                        |
| 3  | 21473 SD80.00 | Superficial injury of eyelids and periocular area           |
| 4  | 4883 SE0z.00  | Contusion of face, scalp and neck NOS                       |
| 5  | 56120 ZRM..11 | ISS - Injury severity score                                 |
| 6  | 59932 S410y00 | Other closed traumatic dislocation of shoulder              |
| 7  | 37013 TG81100 | Accidental burning caused by ammonia                        |
| 8  | 93039 TN2..00 | Injury ?accidental, poisoning by other gases                |
| 9  | 29766 S80..00 | Open wound of ocular adnexa                                 |
| 10 | 56384 S120300 | Closed fracture of three ribs                               |
| 11 | 67641 SC00.00 | Late effect of fracture of skull and face bones             |
| 12 | 36291 S832z00 | Open wound of nose NOS                                      |
| 13 | 35066 SA12.11 | Open wound of leg with tendon injury                        |
| 14 | 2127 S836400  | Open wound of tongue                                        |
| 15 | 68940 S025z00 | Fracture of malar or maxillary bones, open, NOS             |
| 16 | 27632 S643.00 | Diffuse brain injury                                        |
| 17 | 59341 S022300 | Closed fracture of mandible, coronoid process               |
| 18 | 55483 SB23300 | Splenic vein injury                                         |
| 19 | 67584 S4C0200 | Closed fracture-dislocation mid carpal                      |
| 20 | 33749 S200.00 | Closed fracture of clavicle                                 |
| 21 | 53693 S251500 | Open fracture finger metacarpal head                        |
| 22 | 65728 SH23400 | Full thickness burn of the back (excluding buttock)         |
| 23 | 53582 S740y00 | Other liver laceration without open wound into cavity       |
| 24 | 2643 S25..11  | Hand fracture - metacarpal bone                             |
| 25 | 99162 SJ41200 | Splanchnic nerve injury                                     |
| 26 | 73447 S750z00 | Spleen injury without mention of open wound into cavity NOS |
| 27 | 27848 SJ61000 | Closed injury femoral nerve                                 |
| 28 | 56961 S12..00 | Fracture of rib(s), sternum, larynx and trachea             |
| 29 | 59278 SJ21.11 | Dorsal cord injury without spinal bone injury               |
| 30 | 56831 SC20z00 | Late effect of intracranial injury NOS                      |
| 31 | 37192 S021.11 | Open fracture nasal bone                                    |
| 32 | 69418 S130400 | Closed fracture acetabulum, floor                           |
| 33 | 52398 S260V00 | Closed fracture finger distal phalanx, mallet               |
| 34 | 60090 S441100 | Open traumatic dislocation metacarpophalangeal joint        |
| 35 | 94360 S311z00 | Open fracture of femur, shaft or unspecified part, NOS      |
| 36 | 16496 S76..00 | Injury to kidney                                            |
| 37 | 10676 S424.00 | Dislocation of radial head                                  |
| 38 | 91120 SJ1y100 | Glossopharyngeal (9th) nerve injury                         |
| 39 | 38472 7K1Ld00 | Primary arthroscopic reduction of fracture                  |
| 40 | 43786 S11..12 | Fracture of vertebra with spinal cord lesion                |
| 41 | 54299 S100K00 | Closed fracture cervical vertebra, spinous process          |
| 42 | 71512 SC2..00 | Late effect of nervous system injury                        |
| 43 | 5886 7K1L700  | Closed reduction of fracture of tibia and or fibula         |
| 44 | 95781 S497z00 | Open dislocation NOS                                        |
| 45 | 37087 S82v012 | Open wound of tympanic membrane without complication        |
| 46 | 57444 S116.00 | Closed fracture of sacrum with spinal cord lesion           |
| 47 | 34106 S311000 | Open fracture of femur, unspecified part                    |
| 48 | 25173 7J03000 | Reduction of fracture of nasoethmoid complex of bones       |
| 49 | 12791 S310011 | Thigh fracture NOS                                          |
| 50 | 94172 SH22x00 | Partial thickness burn of multiple sites of the trunk       |
| 51 | 56539 SB24100 | Renal artery injury                                         |

|    |                |                                                              |
|----|----------------|--------------------------------------------------------------|
| 1  |                |                                                              |
| 2  | 37281 SD7z100  | Superficial injury of toe NOS, infected                      |
| 3  | 45779 S300A00  | Closed fracture of femur, upper epiphysis                    |
| 4  | 49564 7J42000  | Open reduction of fracture of spine & excis facet of spine   |
| 5  | 68103 S73x300  | Pancreas tail injury without open wound into cavity          |
| 6  | 3408 S021.00   | Open fracture nose                                           |
| 7  |                |                                                              |
| 8  | 17765 SH51600  | Superficial burn of the thigh                                |
| 9  | 102013 S241z00 | Open fracture of carpal bone NOS                             |
| 10 | 51314 SH53100  | Full thickness burn of the toe(s)                            |
| 11 | 38867 SR2..00  | Dislocations, sprains & strains involv multiple body regions |
| 12 | 33679 S260G00  | Closed fracture finger proximal phalanx, neck                |
| 13 | 11470 SA1..00  | Open wound of knee, leg and ankle                            |
| 14 | 73713 SH44000  | Deep full thickness burn of hand unsp, no loss of body part  |
| 15 | 39991 7K6GD00  | Closed reduction of dislocation of foot                      |
| 16 | 12101 SD60000  | Abrasion, hip                                                |
| 17 |                |                                                              |
| 18 | 73981 S301.00  | Open fracture proximal femur, transcervical                  |
| 19 | 64872 S102300  | Closed fracture thoracic vertebra, spinous process           |
| 20 | 96120 S430200  | Closed traumatic dislocation radiocarpal joint               |
| 21 | 96984 S135000  | Open fracture of ilium, unspecified                          |
| 22 | 8702 SD6..00   | Superficial injury of lower limb, excluding foot             |
| 23 |                |                                                              |
| 24 | 64098 SF21z00  | Crush injury, elbow and forearm NOS                          |
| 25 | 57979 S240000  | Closed fracture of carpal bone, unspecified                  |
| 26 | 33929 S240z00  | Closed fracture of carpal bone NOS                           |
| 27 | 40833 SD21z00  | Abrasion or friction burn shoulder/upper arm, infected, NOS  |
| 28 | 64525 SH70300  | Burn of the pharynx                                          |
| 29 | 56927 S4G1.00  | Open fracture-dislocation, ankle joint                       |
| 30 | 28038 SE22000  | Contusion, anterior abdominal wall                           |
| 31 | 8704 S23y300   | Open fracture of the radius and ulna                         |
| 32 |                |                                                              |
| 33 | 73788 S114500  | Closed spinal fracture with cauda equina lesion              |
| 34 | 96659 S102200  | Closed fracture thoracic vertebra, spondylolysis             |
| 35 | 94457 SH81100  | Burn: 10-14% of body surface, 10-14% BS full thickness       |
| 36 |                |                                                              |
| 37 | 47837 S240C00  | Closed fracture scaphoid, waist, oblique                     |
| 38 | 67443 S734200  | Transverse colon injury without open wound into cavity       |
| 39 | 101517 S118z00 | Closed fracture of coccyx with spinal cord lesion NOS        |
| 40 | 54471 SF32.00  | Crush injury, ankle and foot, excluding toe(s)               |
| 41 | 29003 SH43200  | Full thickness burn of the thumb                             |
| 42 | 28124 SA2z.00  | Open wound of foot NOS                                       |
| 43 | 70604 S221600  | Open fracture proximal humerus, three part                   |
| 44 | 22512 SJ59.00  | Long thoracic nerve injury                                   |
| 45 | 99549 S023200  | Open fracture of mandible, subcondylar                       |
| 46 |                |                                                              |
| 47 | 56311 S241500  | Open fracture trapezium                                      |
| 48 | 2672 S36..00   | Fracture of one or more phalanges of foot                    |
| 49 | 49357 TG80200  | Accidental burning or scalding caused by liquid metal        |
| 50 | 36460 S49z.00  | Other dislocation NOS                                        |
| 51 | 65300 S101600  | Open fracture of sixth cervical vertebra                     |
| 52 | 110570 S411500 | Open traumatic dislocation scapula                           |
| 53 | 28604 S362000  | Closed fracture of great toe                                 |
| 54 | 23780 S03z.11  | Depressed skull fracture NOS                                 |
| 55 |                |                                                              |
| 56 | 110247 7J42J00 | Primary closed reduction spinal fracture alone               |
| 57 | 25485 S33z.00  | Fracture of tibia and fibula, NOS                            |
| 58 |                |                                                              |
| 59 | 98867 S251A00  | Open fracture thumb metacarpal shaft                         |
| 60 |                |                                                              |



|    |                |                                                              |
|----|----------------|--------------------------------------------------------------|
| 1  |                |                                                              |
| 2  | 110059 SJ33100 | Sacral nerve root injury - S2                                |
| 3  | 7672 7K1D.00   | Primary open reduction fracture bone & intramedull fixation  |
| 4  | 51392 7J13100  | Open reduction of fracture of maxilla NEC                    |
| 5  | 38765 S34y.00  | Open fracture ankle, unspecified                             |
| 6  | 20589 S911200  | Open wound of wrist with complication                        |
| 7  | 24246 SK1x800  | Multiple open wounds of lower leg                            |
| 8  | 23741 SJW..00  | Injury of unspecified nerve at forearm level                 |
| 9  | 65731 S261900  | Open fracture thumb distal phalanx, base                     |
| 10 | 384 TC...11    | Fall - accidental                                            |
| 11 | 55201 S231z00  | Open fracture of forearm, upper end, NOS                     |
| 12 | 108484 S112000 | Cls spinal fracture with unspec thoracic cord lesion,T1-6    |
| 13 | 108839 SH88.00 | Burn involving 80-89% of body surface (BS)                   |
| 14 | 48874 S4D2.00  | Closed fracture-subluxation digit                            |
| 15 | 98165 7J42B00  | Primary other external stabilisation of spinal fracture      |
| 16 | 104624 S431200 | Open traumatic dislocation radiocarpal joint                 |
| 17 | 108551 S490211 | Closed dislocation of second cervical vertebra (C2)          |
| 18 | 109098 SJ2x.00 | Spinal cord injury multiple site without spinal bone injury  |
| 19 | 27492 S031.00  | Closed fracture of skull NOS with intracranial injury        |
| 20 | 933 PE30.00    | Congenital dislocation of hip                                |
| 21 | 93829 S491.12  | Open dislocation of neck                                     |
| 22 | 5918 SK1D000   | Injury of adductor muscle and tendon of thigh                |
| 23 | 108000 S135100 | Open fracture pelvis, ischium                                |
| 24 | 106875 S4H1600 | Open fracture-dislocation, IPJ, multiple toes                |
| 25 | 48625 S723100  | Open injury of oesophagus                                    |
| 26 | 38482 SF23200  | Closed crush injury, finger, multiple                        |
| 27 | 27718 S4A0100  | Closed fracture-dislocation acromio-clavicular joint         |
| 28 | 22403 SB44.00  | Popliteal blood vessel injury                                |
| 29 | 69319 7J13z00  | Reduction of fracture of maxilla NOS                         |
| 30 | 27719 S334.00  | Closed fracture distal tibia                                 |
| 31 | 61735 SJ41.00  | Other sympathetic nerve injury                               |
| 32 | 52340 S4H1.00  | Open fracture-dislocation, foot                              |
| 33 | 106511 S621z00 | Subarachnoid h'ge inj + open intracran wnd+concussion unspec |
| 34 | 44054 S491800  | Open dislocation C7/T1                                       |
| 35 | 5860 SD1y100   | Superficial injury chest wall NOS, without major open wound  |
| 36 | 59199 S481600  | Open traumatic dislocation toe, IPJ, single                  |
| 37 | 6248 7K1J.00   | Closed (or no) reduction of fracture and internal fixation   |
| 38 | 99932 S431100  | Open traumatic dislocation distal radio-ulnar joint          |
| 39 | 106490 S73y100 | Pancreas head injury with open wound into cavity             |
| 40 | 100701 S725000 | Closed injury of thoracic trachea                            |
| 41 | 44640 S900200  | Open wound of axillary region                                |
| 42 | 30707 S01..12  | Ethmoid sinus fracture                                       |
| 43 | 33985 S4D0300  | Closed fracture-dislocation, distal interphalangeal joint    |
| 44 | 93458 S622z00  | Subdural h'ge inj no open intracran wound+concussion unspec  |
| 45 | 10149 S23A.00  | Fracture of shafts of both ulna and radius                   |
| 46 | 106172 SJ51100 | Closed injury, median nerve, palmar sensory branch           |
| 47 | 106139 TN01300 | Injury ?accidental poisoning by Pentobarbitone               |
| 48 | 40976 S292000  | Closed multiple fractures of clavicle, scapula and humerus   |
| 49 | 35650 SB10.00  | Thoracic aorta injury                                        |
| 50 | 10475 7K6GH00  | Closed reduction of dislocation of jaw                       |
| 51 | 33937 SH32.00  | Partial thickness burn of the arm                            |

|    |                |                                                              |
|----|----------------|--------------------------------------------------------------|
| 1  |                |                                                              |
| 2  | 94593 S4J3000  | Open fracture-subluxation of sternum                         |
| 3  | 70488 S490z00  | Closed dislocation of cervical vertebra NOS                  |
| 4  | 66808 S345000  | Open fracture ankle, bimalleolar, low fibular fracture       |
| 5  | 6299 S263.00   | Fracture of other finger                                     |
| 6  | 67655 S465600  | Closed traumatic dislocation, head of fibula                 |
| 7  | 71933 S72x.00  | Multiple intrathoracic organ injury no open wound to cavity  |
| 8  | 15558 S601.00  | Concussion with less than 1 hour loss of consciousness       |
| 9  | 51213 S361200  | Open fracture distal phalanx, toe                            |
| 10 | 34340 SJ10.00  | Oculomotor (3rd) nerve injury                                |
| 11 | 48961 S223000  | Open fracture of humerus NOS                                 |
| 12 | 30620 7K6GL00  | Closed reduction of dislocation of nasal septum              |
| 13 | 29493 SD71.00  | Abrasion or friction burn of foot and toe, infected          |
| 14 | 51937 SJ31800  | Thoracic nerve root injury - T9                              |
| 15 | 56596 SB23.00  | Portal and splenic vein injury                               |
| 16 | 40650 S4F6.00  | Closed fracture-subluxation, patello-femoral joint           |
| 17 | 105137 S011300 | Closed #skull bse + intracranial injury, 1-24hr loss consc   |
| 18 | 64303 SD20400  | Abrasion, clavicular area                                    |
| 19 | 42450 SD6z.00  | Superficial injury of lower limb, infected                   |
| 20 | 99058 SH54300  | Deep full thickness burn of ankle without loss of body part  |
| 21 | 96691 S235400  | Open fracture of ulna, lower epiphysis                       |
| 22 | 20598 7J43.00  | Fixation of fracture of spine                                |
| 23 | 66858 SH71z00  | Burn of the larynx, trachea or lung NOS                      |
| 24 | 71843 TKxz.00  | Suicide and selfinflicted injury by other means NOS          |
| 25 | 91485 N226K00  | Dislocation of tendon, wrist or hand                         |
| 26 | 28133 S10A000  | Fracture of first cervical vertebra                          |
| 27 | 20678 S333200  | Open fracture of tibia and fibula, shaft                     |
| 28 | 58688 S010000  | Closed #skull bse no intracranial injury, unspec state consc |
| 29 | 8860 SA23.00   | Degloving injury, foot                                       |
| 30 | 92188 S441z00  | Open traumatic dislocation of finger not otherwise specified |
| 31 | 1250 S224.11   | Elbow fracture - closed                                      |
| 32 | 12253 SE32000  | Contusion, hand, excluding finger                            |
| 33 | 57687 SD11500  | Abrasion of buttock, infected                                |
| 34 | 104356 S4B2100 | Closed fracture-subluxation superior radio-ulnar joint       |
| 35 | 109377 S110100 | Cls spinal fracture with complete cervcl cord lesion, C1-4   |
| 36 | 67718 S261L00  | Open fracture finger middle phalanx, base                    |
| 37 | 104106 SK12500 | Injury of muscle of rotator cuff of shoulder                 |
| 38 | 96644 S303011  | Open fracture of femur, greater trochanter                   |
| 39 | 104015 S4D2600 | Closed fracture-subluxation multiple digits                  |
| 40 | 39393 SK12z00  | Other shoulder and upper arm injury NOS                      |
| 41 | 68354 SB00z00  | Carotid artery injury NOS                                    |
| 42 | 51364 S232000  | Closed fracture of radius, shaft, unspecified                |
| 43 | 59046 SJ31900  | Thoracic nerve root injury - T10                             |
| 44 | 54780 S23y.00  | Open fracture of radius and ulna, unspecified part           |
| 45 | 30092 SJ33000  | Sacral nerve root injury - S1                                |
| 46 | 61380 SK1x200  | Multiple open wounds of neck                                 |
| 47 | 102751 SyuA400 | [X]Multiple dislocations, sprains and strains, unspecified   |
| 48 | 37479 SE23000  | Contusion, interscapular region                              |
| 49 | 36255 TK6..00  | Suicide and selfinflicted injury by cutting and stabbing     |
| 50 | 16826 SB2..00  | Injury to abdominal and pelvic blood vessels                 |
| 51 | 4452 N083.00   | Recurrent dislocation of joint                               |

|    |                |                                                             |
|----|----------------|-------------------------------------------------------------|
| 1  |                |                                                             |
| 2  | 102775 SJ21z00 | Thoracic cord injury without spinal bone injury, NOS        |
| 3  | 104898 SA03000 | Degloving injury, hip                                       |
| 4  | 25654 7K6F.00  | Primary open reduction of traumatic dislocation of joint    |
| 5  | 62728 S760000  | Kidney injury without open wound into cavity, unspecified   |
| 6  | 28325 SH0..12  | Corneal burns                                               |
| 7  | 72101 S494z00  | Closed dislocation of spine NOS                             |
| 8  | 57592 S210z00  | Closed fracture of scapula NOS                              |
| 9  | 59419 S833200  | Open wound of nasal cavity with complication                |
| 10 | 102254 7K1Y.00 | Second closed reduction fracture bone and internal fixation |
| 11 | 105238 K04..12 | Acute kidney injury                                         |
| 12 | 10843 TN60.00  | Injury ?accidental, by cutting instrument                   |
| 13 | 60260 S023800  | Open fracture of mandible, body, other and unspecified      |
| 14 | 34454 SJ54.00  | Musculocutaneous nerve injury                               |
| 15 | 71411 SH33000  | Full thickness burn of the arm, unspecified                 |
| 16 | 66298 S840000  | Open wound of larynx and trachea, unspecified               |
| 17 | 54149 S4B1000  | Open fracture-dislocation elbow joint                       |
| 18 | 9736 S01..15   | Occiput bone fracture                                       |
| 19 | 61631 S431400  | Open traumatic dislocation CMCJ                             |
| 20 | 18453 S49x.13  | Hand dislocation NOS                                        |
| 21 | 35312 S02yz00  | Fracture of other facial bones,open, NOS                    |
| 22 | 101914 S82v300 | Open wound of cochlea                                       |
| 23 | 71722 S852.00  | Open wound of front wall of thorax                          |
| 24 | 23753 TK7..00  | Suicide and selfinflicted injury by jumping from high place |
| 25 | 9165 S234300   | Closed fracture of ulna, styloid process                    |
| 26 | 55189 SF32z00  | Crush injury, ankle and foot NOS                            |
| 27 | 25768 SD5z.00  | Superficial injury of finger NOS, infected                  |
| 28 | 24804 SF10211  | Crush injury of labia                                       |
| 29 | 34355 7K1JK00  | Primary closed reduction of fracture and wire fixation      |
| 30 | 27431 SH20600  | Unspecified thickness burn of the genitalia                 |
| 31 | 6998 SE23100   | Contusion, buttock                                          |
| 32 | 38296 SA4..00  | Multiple and unspecified open wound of lower limb           |
| 33 | 101909 S495100 | Open dislocation of coccyx                                  |
| 34 | 101488 SF20900 | Open crush injury, shoulder area                            |
| 35 | 34634 7J42100  | Open reduction of fracture of spine NEC                     |
| 36 | 63049 S4D0600  | Closed fracture-dislocation multiple digits                 |
| 37 | 7485 SD61.00   | Abrasion or friction burn of lower limb, infected           |
| 38 | 47842 S000.00  | Closed fracture vault of skull without intracranial injury  |
| 39 | 101241 SB16.00 | Pulmonary blood vessel injury                               |
| 40 | 19058 S234D00  | Closed fracture distal radius, extra-articular, other type  |
| 41 | 44790 S232200  | Closed fracture of the ulnar shaft                          |
| 42 | 66544 S4D3100  | Open fracture-subluxation, metacarpophalangeal joint        |
| 43 | 94416 S261500  | Open fracture thumb proximal phalanx, shaft                 |
| 44 | 100875 S61x600 | Brain cont no open intracranial wound + LOC unspec duration |
| 45 | 29673 S82v.00  | Other open wound of ear                                     |
| 46 | 18958 SH21200  | Superficial burn of the chest wall                          |
| 47 | 100771 S301311 | Open fracture base of neck of femur                         |
| 48 | 97736 S497700  | Open traumatic dislocation costo-chondral joint             |
| 49 | 68731 SH13200  | Full thickness burn of the eye                              |
| 50 | 100640 S33B.00 | Open fracture of distal tibia and fibula                    |
| 51 | 44885 SB2y100  | Ovarian vein injury                                         |

|    |                |                                                             |
|----|----------------|-------------------------------------------------------------|
| 1  |                |                                                             |
| 2  | 22301 PE8y200  | Congenital dislocation of elbow                             |
| 3  | 33903 S37..00  | Fracture of lower limb, level unspecified                   |
| 4  | 2176 S362.00   | Fracture of great toe                                       |
| 5  | 95716 S836x00  | Multiple open mouth wounds                                  |
| 6  | 28550 S330000  | Closed fracture of the proximal tibia                       |
| 7  | 4838 SE1z.00   | Contusion, eye NOS                                          |
| 8  | 39355 SJ23.00  | Sacral cord injury without bony injury                      |
| 9  | 31982 S820000  | Open wound of external ear, unspecified                     |
| 10 | 68436 S894.00  | Open wound of lateral abdominal wall                        |
| 11 | 104726 S003400 | Open #skull vlt + intracranial injury, >24hr LOC + recovery |
| 12 | 34367 S23y100  | Open fracture of radius (alone), unspecified                |
| 13 | 34158 S420.00  | Closed traumatic dislocation elbow joint                    |
| 14 | 96734 S481700  | Open traumatic dislocation, metatarso-phalangeal jnt, multi |
| 15 | 8439 SD41.00   | Abrasion or friction burn of hand, infected                 |
| 16 | 41154 S776.00  | Injury of ureter                                            |
| 17 | 65195 SH41.11  | Erythema of wrist and hand,first degree burn                |
| 18 | 28954 S312.00  | Closed fracture distal femur                                |
| 19 | 36282 SD4z.00  | Superficial injury of hand NOS, infected                    |
| 20 | 51916 SH14900  | Deep full thickness burn of neck without loss of body part  |
| 21 | 73759 S821z00  | Open wound of external ear with complication, NOS           |
| 22 | 97891 TN52.00  | Injury ?accidental, by hunting rifle                        |
| 23 | 47828 S347000  | Open fracture ankle, trimalleolar, low fibular fracture     |
| 24 | 3373 S834400   | Open wound of lip                                           |
| 25 | 60560 S901300  | Open wound of upper arm with complication                   |
| 26 | 27517 SE22200  | Contusion, groin                                            |
| 27 | 99895 S12y.00  | Fracture of other parts of bony thorax                      |
| 28 | 99127 SH85z00  | Burn: 50-59% of body surface NOS                            |
| 29 | 18360 S410.00  | Closed traumatic dislocation of shoulder                    |
| 30 | 7393 7K15.00   | Other surgical fracture of bone                             |
| 31 | 835 S10B200    | Fracture of coccyx                                          |
| 32 | 66322 S150100  | Open multiple fracture of thoracic spine                    |
| 33 | 48959 SA11.00  | Open wound of knee, leg and ankle with complication         |
| 34 | 61653 7K6GX00  | Primary closed reduction of fracture dislocation alone      |
| 35 | 97211 S353500  | Open fracture intermediate cuneiform                        |
| 36 | 35337 SC...00  | Late effects injury/poisoning/toxic effects/external causes |
| 37 | 27615 SF23300  | Open crush injury, finger                                   |
| 38 | 61998 S440600  | Closed traumatic dislocation multiple digits                |
| 39 | 48337 S302012  | Closed fracture of femur, lesser trochanter                 |
| 40 | 2490 S93..13   | Open wound of thumb                                         |
| 41 | 72499 SH24500  | Deep full thickness burn of buttock, no loss of body part   |
| 42 | 18430 SC13.00  | Late effect of contusion                                    |
| 43 | 60669 S4F5.00  | Open fracture-dislocation, patello-femoral joint            |
| 44 | 56980 SB22100  | Gastric artery injury                                       |
| 45 | 31354 S480200  | Closed traumatic dislocation, midtarsal joint               |
| 46 | 99383 SH87.00  | Burn involving 70-79% of body surface (BS)                  |
| 47 | 86803 S225400  | Open fracture of distal humerus, condyle(s) unspecified     |
| 48 | 45527 S130z00  | Closed fracture acetabulum NOS                              |
| 49 | 51420 S480300  | Closed traumatic dislocation, tarso-metatarsal joint        |
| 50 | 61286 SH73300  | Burn of the rectum                                          |
| 51 | 31326 S47z.00  | Dislocation of ankle NOS                                    |

|    |                |                                                             |
|----|----------------|-------------------------------------------------------------|
| 1  |                |                                                             |
| 2  | 63712 S4C2600  | Closed fracture-subluxation peri-lunate trans-scaphoid      |
| 3  | 30561 SH11800  | Superficial burn of the cheek                               |
| 4  | 33721 SJ20z00  | Cervical cord injury without spinal bone injury NOS         |
| 5  | 37575 SH10700  | Unspecified thickness burn of the forehead                  |
| 6  |                |                                                             |
| 7  | 22427 S430012  | Dislocation of radius - distal                              |
| 8  | 99140 SH55300  | Deep full thickness burn of ankle, with loss of body part   |
| 9  | 18239 SJ30500  | Cervical nerve root injury - C6                             |
| 10 | 69297 TN6z.00  | Injury ?accidental, by cutting or stabbing instrument NOS   |
| 11 | 99080 S735.00  | Colon or rectum injury with open wound into cavity          |
| 12 |                |                                                             |
| 13 | 9719 SJ52.00   | Ulnar nerve injury                                          |
| 14 | 93426 SH13700  | Full thickness burn of the forehead                         |
| 15 | 33705 SJ56400  | Open injury, digital nerve in finger                        |
| 16 | 417 S020.00    | Closed fracture nose                                        |
| 17 | 56576 SJ32100  | Lumbar nerve root injury - L2                               |
| 18 |                |                                                             |
| 19 | 99018 S001100  | Closed #skull vlt + intracranial injury, no loss of consc   |
| 20 | 21942 7K1Gy11  | Primary open reduction of bone fracture & external fixation |
| 21 | 72412 S001400  | Closed #skull vlt + intracranial injury, >24hr LOC+recovery |
| 22 | 94265 S4D1200  | Open fracture-dislocation IPJ, unspecified                  |
| 23 | 53632 SD6z300  | Superficial injury of lower leg NOS, infected               |
| 24 |                |                                                             |
| 25 | 40378 S910300  | Open wound of wrist, volar                                  |
| 26 | 99325 S225x00  | Open fracture of distal humerus, multiple                   |
| 27 | 29913 SH42100  | Superficial partial thickness burn of a single finger       |
| 28 | 107041 S043.00 | Mult #skull/face + other bones, open + intracranial injury  |
| 29 | 53859 SD70z00  | Abrasion of foot and toe, without mention of infection, NOS |
| 30 |                |                                                             |
| 31 | 66539 7K6FF00  | Primary open reduction of # dislocation+cast immobilisation |
| 32 | 24797 SF00.00  | Crush injury, face                                          |
| 33 | 57067 S820200  | Open wound of auditory canal                                |
| 34 | 5139 SE42100   | Contusion, ankle                                            |
| 35 | 801 S430400    | Closed traumatic dislocation carpometacarpal joint          |
| 36 |                |                                                             |
| 37 | 98096 SB34100  | Open injury, palmar artery                                  |
| 38 | 46171 7J42700  | Primary collar stabilisation of spinal fracture             |
| 39 | 35864 SJ70.12  | Neck superficial nerve injury                               |
| 40 | 99584 SB24z00  | Renal blood vessel injury NOS                               |
| 41 |                |                                                             |
| 42 | 100009 SJ90.00 | Concussion and oedema of thoracic spinal cord               |
| 43 | 97864 SF31400  | Open crush injury, lower leg                                |
| 44 | 15460 SD70000  | Abrasion, foot                                              |
| 45 | 39961 SH42000  | Superficial partial thickness burn of hand, unspecified     |
| 46 | 71211 SF21400  | Open crush injury, forearm                                  |
| 47 |                |                                                             |
| 48 | 64414 S880000  | Degloving injury penis                                      |
| 49 | 19202 SRz..00  | Injury involving multiple body regions NOS                  |
| 50 | 97772 S73A.00  | Injury of anus                                              |
| 51 | 29716 SF30100  | Crush injury, hip                                           |
| 52 | 66605 S480100  | Closed traumatic tarsal dislocation, unspecified            |
| 53 |                |                                                             |
| 54 | 16829 SD10200  | Abrasion, breast                                            |
| 55 | 41252 S77B.00  | Injury of uterus                                            |
| 56 | 97656 S72..00  | Other and unspecified intrathoracic organ injury            |
| 57 | 21334 7K6G900  | Closed reduction of dislocation of hip                      |
| 58 | 38895 S132y00  | Other specified closed fracture pubis                       |
| 59 | 57922 SF22900  | Open crush injury hand, palm                                |
| 60 | 28426 S332100  | Closed fracture shaft of fibula                             |



|    |                |                                                             |
|----|----------------|-------------------------------------------------------------|
| 1  |                |                                                             |
| 2  | 29889 SE32300  | Contusion hand, dorsum                                      |
| 3  | 71846 SF00z00  | Crush injury, face NOS                                      |
| 4  | 58720 S4E1.00  | Open fracture-dislocation, hip joint                        |
| 5  | 97354 S107100  | Open vertical fracture of sacrum                            |
| 6  |                |                                                             |
| 7  | 68595 S4C2300  | Closed fracture-subluxation, carpometacarpal joint          |
| 8  | 31474 SH52500  | Superficial partial thickness burn of the knee              |
| 9  | 16389 S210100  | Closed fracture scapula, acromion                           |
| 10 | 6731 S349.00   | Fracture of lateral malleolus                               |
| 11 | 69654 SD2z300  | Superficial injury of upper arm NOS, infected               |
| 12 | 11254 SE31100  | Contusion, elbow area                                       |
| 13 | 18962 7K1L500  | Closed reduction of fracture of femur                       |
| 14 | 48076 SB25300  | Iliac artery injury                                         |
| 15 | 54221 SA11200  | Open wound of ankle with complication                       |
| 16 | 9346 SD3y100   | Superficial injury of forearm NOS                           |
| 17 |                |                                                             |
| 18 | 52724 SH52400  | Superficial partial thickness burn of the lower leg         |
| 19 | 72735 SJ34200  | Closed injury, brachial plexus, all roots (complete)        |
| 20 | 41893 SH31000  | Superficial burn of the arm, unspecified                    |
| 21 | 96643 S126100  | Open fracture of hyoid bone                                 |
| 22 | 56309 SD10z00  | Abrasion/friction burn of trunk, without infection NOS      |
| 23 | 63983 TN07.00  | Injury ?accidental, poisoning by agricultural chemicals     |
| 24 | 40313 SH43700  | Full thickness burn of the wrist                            |
| 25 | 65361 SJB3.00  | Injury/multiple blood vessels at shoulder+upper arm level   |
| 26 | 96716 S781.00  | Open injury other intra-abdominal structure                 |
| 27 | 8915 S293.00   | Multiple fractures of forearm                               |
| 28 |                |                                                             |
| 29 | 65647 S645000  | Intracranial injury with prolonged coma without open wound  |
| 30 | 27497 SD80z00  | Superficial injury of eyelids and periocular area NOS       |
| 31 | 25026 SB36000  | Injury of vein at forearm level                             |
| 32 | 62562 S131y00  | Other specified open fracture acetabulum                    |
| 33 | 24611 7K6F200  | Primary open reduction of fracture dislocation of joint NEC |
| 34 | 63191 TG80500  | Accidental burning/scalding by boiling water from saucepan  |
| 35 | 40888 TN50.00  | Injury ?accidental, by handgun                              |
| 36 | 54915 SC07.00  | Late effect of sprain without mention of tendon injury      |
| 37 | 49847 S352600  | Closed fracture lateral cuneiform                           |
| 38 | 41819 SD40000  | Abrasion hand, palm                                         |
| 39 | 97791 S780300  | Peritoneum injury without mention of open wound into cavity |
| 40 | 57061 SE32500  | Contusion wrist, dorsum                                     |
| 41 | 60754 S46C.00  | Injury to multiple structures of knee                       |
| 42 | 96473 S117.00  | Open fracture of sacrum with spinal cord lesion             |
| 43 | 38492 SH12611  | Scalp - 2nd degree burn                                     |
| 44 | 7034 7K1LE00   | Closed reduction of fracture of elbow                       |
| 45 | 26133 S430500  | Closed traumatic dislocation proximal metacarpal            |
| 46 | 56886 S240y00  | Closed fracture of other carpal bone                        |
| 47 | 96434 SJ6z.00  | Pelvic girdle and lower limb nerve injury NOS               |
| 48 | 29162 S3zz.00  | Fracture of bones NOS                                       |
| 49 | 12441 S834600  | Open wound of chin                                          |
| 50 | 53036 SD0yz00  | Superficial injury of face/neck/scalp, no infection, NOS    |
| 51 | 104738 S02y200 | Fracture of palate, open                                    |
| 52 | 69261 S832x00  | Multiple wounds of nose                                     |
| 53 | 7606 TN82.00   | Injury ?accidental, by scald                                |
| 54 | 11825 SK1..00  | Other specified injury                                      |
| 55 |                |                                                             |
| 56 |                |                                                             |
| 57 |                |                                                             |
| 58 |                |                                                             |
| 59 |                |                                                             |
| 60 |                |                                                             |

|    |                |                                                              |
|----|----------------|--------------------------------------------------------------|
| 1  |                |                                                              |
| 2  | 24065 SJ5..00  | Shoulder girdle and upper limb peripheral nerve injury       |
| 3  | 28524 S102100  | Closed fracture thoracic vertebra, wedge                     |
| 4  | 65028 S4H2100  | Closed fracture-subluxation, midtarsal joint                 |
| 5  | 15800 7J03.00  | Reduction of fracture of facial bone                         |
| 6  | 96956 SD1zC00  | Superficial injury of vulva NOS, infected                    |
| 7  | 95839 S12y000  | Closed fracture of other parts of bony thorax                |
| 8  | 35974 S481300  | Open traumatic dislocation, tarso-metatarsal joint           |
| 9  | 9926 SE04.00   | Contusion, gum                                               |
| 10 | 100361 S497600 | Open traumatic dislocation costo-vertebral joint             |
| 11 | 9202 SH9..00   | Burn - unspecified                                           |
| 12 | 28475 SD61400  | Abrasion of ankle, infected                                  |
| 13 | 95633 S294000  | Cl fractures involving multiple regions of both upper limbs  |
| 14 | 29313 SA1z.00  | Open wound of knee, leg and ankle NOS                        |
| 15 | 41555 S933000  | Degloving injury, finger unspecified                         |
| 16 | 95601 SB25.00  | Iliac blood vessel injury                                    |
| 17 | 62716 S022.11  | Fracture of inferior maxilla, closed                         |
| 18 | 6727 SF2..00   | Crush injury, upper limb                                     |
| 19 | 3898 S910200   | Open wound of wrist, unspecified                             |
| 20 | 6579 SD7y100   | Superficial injury of toe NOS                                |
| 21 | 806 S339.00    | Fracture of fibula alone                                     |
| 22 | 55106 SH53600  | Full thickness burn of the thigh                             |
| 23 | 66610 S73y500  | Appendix injury with open wound into cavity                  |
| 24 | 11938 SD20.00  | Abrasion/friction burn shoulder/upper arm without infection  |
| 25 | 94709 S860000  | Degloving injury back                                        |
| 26 | 48886 S102400  | Closed fracture thoracic vertebra, transverse process        |
| 27 | 51938 S333100  | Open fracture shaft of fibula                                |
| 28 | 55171 SJ31300  | Thoracic nerve root injury - T4                              |
| 29 | 12232 SD00200  | Abrasion, scalp                                              |
| 30 | 45192 SB34200  | Injury of superficial palmar arch                            |
| 31 | 73072 SH23000  | Full thickness burn of the trunk, unspecified                |
| 32 | 69475 S913000  | Degloving injury, forearm                                    |
| 33 | 31130 SD7z.00  | Superficial injury of foot and toe NOS, infected             |
| 34 | 7500 S262.00   | Fracture of thumb                                            |
| 35 | 25811 S250800  | Closed fracture of thumb metacarpal                          |
| 36 | 70503 S233200  | Open fracture of the ulnar shaft                             |
| 37 | 71894 S901000  | Open wound of shoulder region with complication              |
| 38 | 28234 S134400  | Closed fracture pelvis, anterior superior iliac spine        |
| 39 | 68021 SJ17.00  | Hypoglossal (12th) nerve injury                              |
| 40 | 99512 S604.00  | Concussion with >24 hrs loss of consc without full recovery  |
| 41 | 16886 S81..12  | Open wound of eye                                            |
| 42 | 37858 S410211  | Posterior dislocation of shoulder                            |
| 43 | 51741 SC01000  | Late effect of fracture of cervical vertebra                 |
| 44 | 33974 S341.00  | Open fracture ankle, medial malleolus                        |
| 45 | 48332 7K6Gb00  | Primary closed reduction # dislocation+fixation by wire(s)   |
| 46 | 103696 SJ22500 | Incomplete lumbar cord injury,unsp,without bony injury       |
| 47 | 31031 SH52.11  | Blister of leg, second degree burn                           |
| 48 | 40078 S125100  | Closed fracture of hyoid bone                                |
| 49 | 50524 S000200  | Closed #skull vlt no intracranial injury, <1hr loss of consc |
| 50 | 65542 S781300  | Peritoneum injury with open wound into cavity                |
| 51 | 104931 S023600 | Open fracture of mandible, symphysis of body                 |



|    |                |                                                              |
|----|----------------|--------------------------------------------------------------|
| 1  |                |                                                              |
| 2  | 94368 S774.00  | Closed injury of uterus                                      |
| 3  | 94365 SB44100  | Popliteal artery injury, unspecified                         |
| 4  | 10252 S1...00  | Fracture of neck and trunk                                   |
| 5  | 68514 S4H3400  | Open fracture-subluxation, IPJ, single toe                   |
| 6  | 94292 S100D00  | Closed fracture axis, transverse process                     |
| 7  | 68737 SA12100  | Open wound of lower leg with tendon involvement              |
| 8  | 35076 SJ6X.00  | Injury of unspecified nerve at hip and thigh level           |
| 9  | 8199 S264.00   | Multiple fractures of fingers                                |
| 10 | 43094 SH89.00  | Burn involving >90% of body surface (BS)                     |
| 11 | 38733 S330700  | Closed fracture tubercle, tibia                              |
| 12 | 94189 S115.00  | Open fracture of lumbar spine with spinal cord lesion        |
| 13 | 110419 SH45000 | Deep full thickness burn of hand unsp, with loss body part   |
| 14 | 95581 SB44z00  | Popliteal blood vessel injury NOS                            |
| 15 | 30072 SC08.00  | Late effect of tendon injury                                 |
| 16 | 34403 S10A100  | Fracture of second cervical vertebra                         |
| 17 | 100528 SB25400 | Iliac vein injury                                            |
| 18 | 52414 SH51z00  | Superficial burn of the leg NOS                              |
| 19 | 24135 S01..14  | Middle fossa fracture                                        |
| 20 | 55327 S312x00  | Closed fracture distal femur, comminuted/intra-articular     |
| 21 | 7428 7K1LG00   | Closed reduction of fracture of shoulder                     |
| 22 | 93497 N331N00  | Fragility fracture                                           |
| 23 | 60239 S023z00  | Fracture of mandible, open, NOS                              |
| 24 | 50356 SH30300  | Unspecified thickness burn of the upper arm                  |
| 25 | 56302 TG8yz00  | Accidental burning caused by hot object NOS                  |
| 26 | 40495 SH40400  | Unspecified thickness burn of the thumb and finger(s)        |
| 27 | 35913 S89..00  | Other open wounds of other sites, excluding limbs            |
| 28 | 35198 S4D0.00  | Closed fracture-dislocation digit                            |
| 29 | 61265 SH21z00  | Superficial burn of the trunk NOS                            |
| 30 | 24715 7K1K.00  | Closed (or no) reduction of fracture and external fixation   |
| 31 | 63292 S4C1600  | Open fracture-dislocation peri-lunate trans-scaphoid         |
| 32 | 93536 S353900  | Open fracture talus, neck                                    |
| 33 | 37291 S3x0.00  | Other, multiple and ill-defined closed fractures lower limb  |
| 34 | 10436 TN81.00  | Injury ?accidental, by burns or fire                         |
| 35 | 50782 SJ53400  | Injury of radial nerve at wrist and hand level               |
| 36 | 93374 S4E2.00  | Closed fracture-subluxation, hip joint                       |
| 37 | 93348 SH13x00  | Full thickness burn of multiple sites of face, head or neck  |
| 38 | 93208 TN80100  | Injury ?accidental, by lying before moving object            |
| 39 | 61668 SH22.11  | Blister of trunk, second degree burn                         |
| 40 | 51408 S74z.00  | Injury to liver, NOS                                         |
| 41 | 63982 S123.00  | Open fracture sternum                                        |
| 42 | 51685 TK31.00  | Suicide + selfinflicted injury by suffocation by plastic bag |
| 43 | 91555 SH62.00  | Partial thickness burn of multiple specified sites           |
| 44 | 9203 SF32100   | Crush injury, ankle                                          |
| 45 | 66754 S640z00  | Intracranial inj NOS no open intracran wnd+concussion unsp   |
| 46 | 100796 S012200 | Open #skull bse no intracranial injury, <1hr loss of consc   |
| 47 | 94661 S4C3300  | Open fracture-subluxation, carpometacarpal joint             |
| 48 | 42200 S4H0300  | Closed #-dislocation, metatarsophalangeal joint, single      |
| 49 | 67358 S100411  | C4 vertebra closed fracture without spinal cord lesion       |
| 50 | 58605 TK7z.00  | Suicide+selfinflicted injury-jump from high place NOS        |
| 51 | 71903 TN8z.00  | Injury ?accidental, by means NOS                             |

|    |                |                                                              |
|----|----------------|--------------------------------------------------------------|
| 1  |                |                                                              |
| 2  | 4409 S10..12   | Fracture of vertebra without spinal cord lesion              |
| 3  | 92296 SH62000  | Superficial partial thickness burn multiple specified sites  |
| 4  | 15260 SH40300  | Unspecified thickness burn of more than one finger           |
| 5  | 66371 TN70.00  | Injury ?accidental, fall from residential premises           |
| 6  | 60110 7K6F900  | Primary open reduction of dislocation and skin traction      |
| 7  | 91823 SF11.00  | Crush injury, other trunk sites                              |
| 8  |                |                                                              |
| 9  | 105958 S466000 | Open traumatic dislocation of knee, unspecified              |
| 10 | 34954 S352400  | Closed fracture medial cuneiform                             |
| 11 | 38054 S30z.00  | Open fracture of neck of femur NOS                           |
| 12 | 91431 SB4W.00  | Injury of unspecified blood vessel at lower leg level        |
| 13 | 91261 SA41.00  | Multiple and unspec open wound of leg with complication      |
| 14 | 52780 S910z00  | Open wound of lower arm, NOS                                 |
| 15 | 55955 S023500  | Open fracture of mandible, angle of jaw                      |
| 16 | 96483 SF22300  | Closed crush injury wrist, volar                             |
| 17 | 44687 SF23500  | Open crush injury, finger, multiple                          |
| 18 | 37478 S48z.00  | Dislocation of foot NOS                                      |
| 19 | 99517 S741400  | Liver major laceration with open wound into cavity           |
| 20 | 73210 S301400  | Open fracture head, femur                                    |
| 21 | 65155 S4J0000  | Closed fracture-dislocation of sternum                       |
| 22 | 70673 S023000  | Open fracture mandible (site unspecified)                    |
| 23 | 89468 S491.13  | Open dislocation cervical vertebra                           |
| 24 | 89434 7P20100  | Delivery of rehabilitation for hip fracture                  |
| 25 | 16278 SD71z00  | Abrasion or friction burn of foot and toe, infected, NOS     |
| 26 | 34212 S4J2100  | Closed fracture-subluxation of pelvis                        |
| 27 | 51950 SH25500  | Deep full thickness burn of buttock, with loss of body part  |
| 28 | 53043 SJ51300  | Open injury, median nerve                                    |
| 29 | 12859 SD30200  | Abrasion wrist, volar                                        |
| 30 | 10589 SD71000  | Abrasion of foot, infected                                   |
| 31 | 18295 SE24100  | Contusion, penis                                             |
| 32 | 101906 TKx6.00 | Suicide and selfinflicted injury by crashing of aircraft     |
| 33 | 3410 S43..00   | Dislocation or subluxation of wrist                          |
| 34 | 71545 SH22000  | Superficial partial thickness burn unspecified part of trunk |
| 35 | 53593 S261B00  | Open fracture thumb distal phalanx, tuft                     |
| 36 | 86395 SJ31A00  | Thoracic nerve root injury - T11                             |
| 37 | 32298 S6z..00  | Intracranial injury, excluding those with skull fracture NOS |
| 38 | 21909 SD10900  | Abrasion, perineum                                           |
| 39 | 73193 SF1y.00  | Crush injury, trunk, multiple sites                          |
| 40 | 32012 7K1Le00  | Primary arthroscopic reduction and fixation of fracture      |
| 41 | 73956 S121700  | Open fracture of seven ribs                                  |
| 42 | 62877 TH0..00  | Late effects of accidental injury                            |
| 43 | 66431 SH56.00  | Burn and corrosion of hip and lower limb,except ankle & foot |
| 44 | 73812 7K1N900  | Primary skeletal traction of fracture                        |
| 45 | 30076 S2z..00  | Fracture of upper limb NOS                                   |
| 46 | 5766 SF32000   | Crush injury, foot                                           |
| 47 | 3090 SE42000   | Contusion, foot                                              |
| 48 | 38826 SD11200  | Abrasion of breast, infected                                 |
| 49 | 36742 SD6y300  | Superficial injury of lower leg NOS                          |
| 50 | 40590 S480700  | Cls traumatic dislocation, metatarso-phalangeal jnt,multiple |
| 51 | 23987 S234211  | Dupuytren's fracture, radius - closed                        |
| 52 | 102868 SB2y.00 | Other abdominal or pelvic blood vessel injury                |
| 53 |                |                                                              |
| 54 |                |                                                              |
| 55 |                |                                                              |
| 56 |                |                                                              |
| 57 |                |                                                              |
| 58 |                |                                                              |
| 59 |                |                                                              |
| 60 |                |                                                              |

|    |                |                                                              |
|----|----------------|--------------------------------------------------------------|
| 1  |                |                                                              |
| 2  | 73714 S740000  | Liver injury without open wound into cavity, unspecified     |
| 3  | 43705 SC12.00  | Late effect of superficial injury                            |
| 4  | 33692 S0z..00  | Fracture of skull NOS                                        |
| 5  | 38878 S301500  | Open fracture proximal femur,subcapital, Garden grade unspec |
| 6  | 96413 SF0z.00  | Crush injury, face, scalp and neck NOS                       |
| 7  |                |                                                              |
| 8  | 37394 SFz..00  | Crushing injury NOS                                          |
| 9  | 101173 SJ52700 | Open injury, ulnar nerve, deep motor                         |
| 10 | 57924 S350000  | Closed fracture calcaneus, extra-articular                   |
| 11 | 44567 TD17.00  | Accident due to fall from other burning structure/building   |
| 12 |                |                                                              |
| 13 | 72275 SB35.00  | Digital blood vessel injury                                  |
| 14 | 12783 S8W..00  | Injury of blood vessels of head, NEC                         |
| 15 | 73451 S013400  | Open #skull bse + intracranial injury, >24hr LOC + recovery  |
| 16 | 62140 SJ62.00  | Posterior tibial nerve injury                                |
| 17 | 28070 S4G3.00  | Open fracture-subluxation, ankle joint                       |
| 18 |                |                                                              |
| 19 | 34021 S332000  | Closed fracture shaft of tibia                               |
| 20 | 41730 S022200  | Closed fracture of mandible, subcondylar                     |
| 21 | 11313 S220100  | Closed fracture proximal humerus, neck                       |
| 22 | 42882 S480.00  | Closed traumatic dislocation of foot                         |
| 23 |                |                                                              |
| 24 | 73416 S110z00  | Closed fracture of cervical spine with cord lesion NOS       |
| 25 | 99303 SR14.00  | Fractures involving multiple regions of both lower limbs     |
| 26 | 51666 S241300  | Open fracture triquetral                                     |
| 27 | 67346 SH42A00  | Deep partial thickness burn of the thumb                     |
| 28 | 73332 S750y00  | Other spleen injury without mention of open wound to cavity  |
| 29 | 6734 7K14.00   | Open surgical fracture of bone                               |
| 30 |                |                                                              |
| 31 | 59802 SJ17.11  | Twelfth cranial nerve injury                                 |
| 32 | 59405 TKx0000  | Suicide + selfinflicted injury-jumping before moving object  |
| 33 | 51137 SD2yz00  | Superficial injury shoulder/upper arm, without infection NOS |
| 34 | 49641 SB24.00  | Renal blood vessel injury                                    |
| 35 | 45956 S011600  | Closed #skull bse + intracranial injury, LOC unspec duration |
| 36 | 14991 S800.00  | Eyelid skin and periocular area laceration                   |
| 37 |                |                                                              |
| 38 | 73208 S313x00  | Open fracture distal femur, comminuted/intra-articular       |
| 39 | 73206 S041.00  | Mult #skull/face+other bones, closed + intracranial injury   |
| 40 | 64172 SD11400  | Abrasion of back, infected                                   |
| 41 | 72586 S353B00  | Open fracture metatarsal base                                |
| 42 |                |                                                              |
| 43 | 1520 S60..00   | Concussion                                                   |
| 44 | 57736 S234A11  | Closed dorsal Barton's fracture-dislocation                  |
| 45 | 40393 S645.00  | Intracranial injury with prolonged coma                      |
| 46 | 48930 SH20z00  | Unspecified thickness burn of the trunk NOS                  |
| 47 |                |                                                              |
| 48 | 12233 SD50.00  | Abrasion/friction burn of finger, without infection          |
| 49 | 98267 S130600  | Closed fracture acetabulum, double column unspecified        |
| 50 | 7792 SD71100   | Abrasion of toe, infected                                    |
| 51 | 55930 7K6FE00  | Primary open reduction of fracture dislocation alone         |
| 52 | 63358 SH15100  | Deep full thickness burn of the ear, with loss of body part  |
| 53 | 33582 S260300  | Closed fracture thumb proximal phalanx                       |
| 54 |                |                                                              |
| 55 | 2662 S230300   | Closed Monteggia's fracture                                  |
| 56 | 72896 SB21z00  | Inferior vena cava injury NOS                                |
| 57 | 27527 SJ7x.00  | Other specified nerve injury                                 |
| 58 | 9239 PE3..00   | Congenital dislocation and subluxation of the hip            |
| 59 | 96696 SH82000  | Burn: 20-29% of body surface,<10%/unspec BS full thickness   |
| 60 | 98916 SH44500  | Deep full thickness burn of palm hand, no loss of body part  |

|    |                |                                                              |
|----|----------------|--------------------------------------------------------------|
| 1  |                |                                                              |
| 2  | 72692 SH51x00  | Superficial burn of multiple sites of the leg                |
| 3  | 53575 7J02300  | Repair of fracture of cranium NEC                            |
| 4  | 72617 S101x00  | Multiple open fractures of cervical vertebrae                |
| 5  | 63557 7K6GP00  | Primary closed reduction dislocation alone                   |
| 6  | 61987 SF31200  | Closed crush injury, lower leg                               |
| 7  |                |                                                              |
| 8  | 29084 S33y200  | Open fracture of tibia and fibula, unspecified part          |
| 9  | 6914 SD11800   | Abrasion of groin, infected                                  |
| 10 | 69688 SH44.14  | Deep third degree burn of wrist, without loss of a body part |
| 11 | 6706 SF2..11   | Crush injury of arm                                          |
| 12 |                |                                                              |
| 13 | 99505 S013200  | Open #skull bse + intracranial injury, <1hr loss of consc    |
| 14 | 100040 S201100 | Open fracture clavicle, medial end                           |
| 15 | 72450 SH42x00  | Partial thickness burn of multiple sites of the wrist/hand   |
| 16 | 50309 S4J0200  | Closed #-dislocation sterno-clavicular joint, anterior       |
| 17 | 98933 S241600  | Open fracture trapezoid                                      |
| 18 |                |                                                              |
| 19 | 3025 S3z2.00   | Stress fracture                                              |
| 20 | 23771 SE09.00  | Contusion, scalp                                             |
| 21 | 72324 S11..11  | Fracture of transverse process of spine + spinal cord lesion |
| 22 | 2470 S3z..00   | Fracture of unspecified bones                                |
| 23 |                |                                                              |
| 24 | 56248 SC01100  | Late effect of fracture of thoracic vertebra                 |
| 25 | 28233 S33y.00  | Open fracture of tibia and fibula, unspecified part, NOS     |
| 26 | 49267 S28..00  | Ill-defined fractures of upper limb                          |
| 27 | 57412 N082P00  | Other acquired pathological dislocation of the hip           |
| 28 | 7317 S344.00   | Closed fracture ankle, bimalleolar                           |
| 29 |                |                                                              |
| 30 | 67458 SH53000  | Full thickness burn of the leg, unspecified                  |
| 31 | 96453 S466z00  | Open dislocation of knee NOS                                 |
| 32 | 72126 S734.00  | Colon or rectum injury without open wound into cavity        |
| 33 | 42864 S232100  | Closed fracture of the radial shaft                          |
| 34 | 57246 S002.00  | Open fracture vault of skull without intracranial injury     |
| 35 | 28249 S260800  | Closed fracture thumb distal phalanx                         |
| 36 |                |                                                              |
| 37 | 45690 S4D1500  | Open fracture-dislocation, interphalangeal joint thumb       |
| 38 | 3224 S87..00   | Open wound of buttock                                        |
| 39 | 35530 7K1LK00  | Closed reduction of fracture of metacarpus                   |
| 40 | 67742 SB23400  | Cystic vein injury                                           |
| 41 |                |                                                              |
| 42 | 2328 S10B500   | Fracture of pubis                                            |
| 43 | 11342 7J12200  | Closed reduction of fracture of mandible NEC                 |
| 44 | 55591 SH33500  | Full thickness burn of the shoulder                          |
| 45 | 52699 S100311  | C3 vertebra closed fracture without spinal cord lesion       |
| 46 | 308 SK17200    | Other ankle injury                                           |
| 47 |                |                                                              |
| 48 | 24583 SDO..00  | Superficial injury to head, excluding eye                    |
| 49 | 62287 SB01.00  | Internal jugular vein injury                                 |
| 50 | 403 S64..13    | Head injury                                                  |
| 51 | 272 S40..00    | Dislocation or subluxation of jaw                            |
| 52 |                |                                                              |
| 53 | 62164 SB02.00  | Injury of vertebral artery                                   |
| 54 | 61487 S900x00  | Multiple open wounds of upper arm                            |
| 55 | 97386 S353A00  | Open fracture talus, body                                    |
| 56 | 40003 SB36.00  | Injury of blood vessels at forearm level                     |
| 57 | 8207 SF22000   | Crush injury, hand, excluding fingers                        |
| 58 | 40321 7K1G300  | Primary open reduction of fracture alone                     |
| 59 | 65715 S261A00  | Open fracture thumb distal phalanx, shaft                    |
| 60 | 54978 SJ31100  | Thoracic nerve root injury - T2                              |

|    |               |                                                             |
|----|---------------|-------------------------------------------------------------|
| 1  |               |                                                             |
| 2  | 43195 S934.00 | Degloving injury, thumb                                     |
| 3  | 36437 S430011 | Carpal dislocation NOS                                      |
| 4  | 59233 S02y.00 | Open fracture other facial bone                             |
| 5  | 93601 SH54600 | Deep full thickness burn of thigh without loss of body part |
| 6  | 53700 SH31200 | Superficial burn of the elbow                               |
| 7  | 38373 PE30100 | Bilateral congenital dislocation of hip                     |
| 8  | 53337 S100H00 | Closed fracture cervical vertebra, wedge                    |
| 9  | 24809 7K1La00 | Revision to skin traction of fracture                       |
| 10 | 67881 SF32300 | Closed crush injury, ankle                                  |
| 11 | 25073 S360000 | Closed fracture proximal phalanx, toe                       |
| 12 | 20071 S78..00 | Other intra-abdominal organ injury                          |
| 13 | 71132 S4H0100 | Closed fracture-dislocation, midtarsal joint                |
| 14 | 71116 SH83.00 | Burn involving 30-39% of body surface (BS)                  |
| 15 | 59157 S894111 | Open wound of flank without complication                    |
| 16 | 4389 SJ14.00  | Facial (7th) nerve injury                                   |
| 17 | 20515 S028100 | Fracture of orbital floor                                   |
| 18 | 40652 SF21200 | Closed crush injury, forearm                                |
| 19 | 59006 S022800 | Closed fracture of mandible, body, other and unspecified    |
| 20 | 92972 SB22200 | Hepatic artery injury                                       |
| 21 | 10618 SH40.12 | Unspecified degree burn of hand                             |
| 22 | 10736 7206100 | Open reduction of fracture of orbit                         |
| 23 | 38408 S4C0100 | Closed fracture-dislocation radiocarpal joint               |
| 24 | 41933 SJ32300 | Lumbar nerve root injury - L4                               |
| 25 | 59843 SH63.00 | Full thickness burn of multiple specified sites             |
| 26 | 57377 N338400 | Angular mal-union of fracture                               |
| 27 | 51447 S420400 | Closed traumatic dislocation elbow joint, lateral           |
| 28 | 94756 SJ64300 | Open injury lateral cutaneous nerve thigh                   |
| 29 | 71888 SB43100 | Lesser saphenous vein injury                                |
| 30 | 51038 S133100 | Open fracture pelvis, multiple pubic rami - stable          |
| 31 | 28155 SC01200 | Late effect of fracture of lumbar vertebra                  |
| 32 | 10462 S4D0500 | Closed fracture-dislocation, interphalangeal joint thumb    |
| 33 | 70865 S441500 | Open traumatic dislocation, interphalangeal joint,thumb     |
| 34 | 33662 SJ52800 | Injury of ulnar nerve at wrist and hand level               |
| 35 | 28371 S352F00 | Closed fracture metatarsal, multiple                        |
| 36 | 69499 TN7z.00 | Injury ?accidental, fall from high place NOS                |
| 37 | 70814 SJ31600 | Thoracic nerve root injury - T7                             |
| 38 | 41972 S834x00 | Multiple open wounds of face                                |
| 39 | 94108 S126300 | Open fracture of trachea                                    |
| 40 | 42844 S4C1.00 | Open fracture dislocation wrist                             |
| 41 | 29090 SE42z00 | Contusion, ankle and foot NOS                               |
| 42 | 36034 SB...00 | Injury to blood vessels                                     |
| 43 | 36267 TG80B00 | Accidental burning or scalding caused by fat                |
| 44 | 8434 SE03.00  | Contusion, lip                                              |
| 45 | 50254 S321400 | Open fracture patella, comminuted (stellate)                |
| 46 | 70623 SD01z00 | Abrasion or friction burn of head, infected, NOS            |
| 47 | 69312 S225300 | Open fracture distal humerus, medial condyle                |
| 48 | 94409 S610z00 | Cortex cont no open intracranial wnd + concussion unspec    |
| 49 | 40659 SF0..11 | Crush injury of head                                        |
| 50 | 36594 SE40z00 | Contusion, hip and thigh NOS                                |
| 51 | 70500 S722000 | Closed injury of bronchus                                   |



|    |                |                                                              |
|----|----------------|--------------------------------------------------------------|
| 1  |                |                                                              |
| 2  | 88737 S313z00  | Open fracture of distal femur not otherwise specified        |
| 3  | 38857 SH40.14  | Unspecified degree burn of wrist                             |
| 4  | 57192 SH30z00  | Unspecified thickness burn of the arm NOS                    |
| 5  | 17087 SE23300  | Contusion of coccyx                                          |
| 6  | 7004 S132000   | Closed fracture pelvis, single pubic ramus                   |
| 7  |                |                                                              |
| 8  | 71623 P334z00  | Total or subtotal congenital cataract NOS                    |
| 9  | 20848 SH31100  | Superficial burn of the forearm                              |
| 10 | 12462 S025100  | Open fracture zygoma                                         |
| 11 | 68815 SH44.00  | Deep full thickness burn of wrist/hand, no loss of body part |
| 12 | 31594 S820w00  | Other open wound of external ear                             |
| 13 | 49595 S313100  | Open fracture of femoral condyle, unspecified                |
| 14 | 65736 S496.00  | Other closed traumatic dislocation                           |
| 15 | 42464 TKy..00  | Late effects of selfinflicted injury                         |
| 16 | 3676 S410411   | Closed dislocation of acromioclavicular joint                |
| 17 |                |                                                              |
| 18 | 69643 SD3z000  | Superficial injury of elbow NOS, infected                    |
| 19 | 8040 S31..00   | Other fracture of femur                                      |
| 20 | 27782 S836700  | Dislocation of tooth                                         |
| 21 | 47501 TKx..00  | Suicide and selfinflicted injury by other means              |
| 22 | 35240 SH13600  | Full thickness burn of the scalp                             |
| 23 | 40587 S134500  | Closed fracture pelvis, anterior inferior iliac spine        |
| 24 | 52861 SD1z800  | Superficial injury of groin NOS, infected                    |
| 25 | 27661 S62..11  | Extradural haemorrhage following injury                      |
| 26 | 64862 7K1K000  | Closed reduction fracture bone and fixation to skeleton HFQ  |
| 27 | 64413 S450z00  | Closed traumatic dislocation of hip not otherwise specified  |
| 28 | 18589 SE40000  | Contusion, hip                                               |
| 29 | 16866 S225700  | Open fracture distal humerus, medial epicondyle              |
| 30 | 10417 S890.00  | Open wound of breast                                         |
| 31 | 15666 S240.00  | Closed fracture of carpal bone                               |
| 32 | 94844 S101A00  | Open fracture axis, odontoid process                         |
| 33 | 69917 S3x1.00  | Other, multiple and ill-defined open fractures of lower limb |
| 34 | 67294 S313400  | Open fracture distal femur, medial condyle                   |
| 35 | 10239 E2A2.00  | Post-concussion syndrome                                     |
| 36 | 8276 S350.00   | Closed fracture of calcaneus                                 |
| 37 | 8885 7K1LJ00   | Closed reduction of fracture of thumb                        |
| 38 | 100196 S353000 | Open fracture of tarsal bone, unspecified                    |
| 39 | 43701 N082Q00  | Pathological dislocation of knee joint                       |
| 40 | 15280 S75..00  | Injury to spleen                                             |
| 41 | 9209 SE33000   | Contusion, finger, unspecified                               |
| 42 | 27582 S91z.00  | Open wound of elbow, forearm and wrist NOS                   |
| 43 | 12327 SR20.00  | Dislocations, sprains and strains involving head with neck   |
| 44 | 66924 S481.00  | Open traumatic dislocation of foot                           |
| 45 | 69647 SD1zA00  | Superficial injury of penis NOS, infected                    |
| 46 | 59416 S83y.00  | Other open wound of head with complication                   |
| 47 | 38053 S100711  | C7 vertebra closed fracture without spinal cord lesion       |
| 48 | 64288 SH53z00  | Full thickness burn of the leg NOS                           |
| 49 | 69640 SD2z000  | Superficial injury of shoulder NOS, infected                 |
| 50 | 5260 S26..11   | Finger fracture                                              |
| 51 | 27815 N083100  | Recurrent joint dislocation, of the shoulder region          |
| 52 | 24674 S310100  | Closed fracture shaft of femur                               |
| 53 | 85998 SB23200  | Portal vein injury                                           |
| 54 |                |                                                              |
| 55 |                |                                                              |
| 56 |                |                                                              |
| 57 |                |                                                              |
| 58 |                |                                                              |
| 59 |                |                                                              |
| 60 |                |                                                              |

|    |                |                                                              |
|----|----------------|--------------------------------------------------------------|
| 1  |                |                                                              |
| 2  | 88761 7K6FP00  | Primary open reduction # dislocation+other jnt stabilisation |
| 3  | 68078 SK10700  | Closed injury of trachea                                     |
| 4  | 65488 SB47100  | Injury of greater saphenous vein at lower leg level          |
| 5  | 71159 TKx4.00  | Suicide and selfinflicted injury by electrocution            |
| 6  | 69449 SH12300  | Superficial partial thickness burn of the lip(s)             |
| 7  | 68763 S135300  | Open fracture pelvis, ischial tuberosity                     |
| 8  | 56665 SH42800  | Deep partial thickness burn of the hand, unspecified         |
| 9  | 6379 7K1LF00   | Closed reduction of fracture of humerus                      |
| 10 | 68811 7J41100  | Anterior decompression of fracture of spine                  |
| 11 | 41971 S33xz00  | Closed fracture of tibia and fibula, unspecified part, NOS   |
| 12 | 29664 S441300  | Open traumatic dislocation, distal interphalangeal joint     |
| 13 | 37875 S231A00  | Open fracture radius and ulna, proximal                      |
| 14 | 16985 S240A00  | Closed fracture scaphoid, proximal pole                      |
| 15 | 62018 SH32700  | Deep partial thickness burn of the arm, unspecified          |
| 16 | 101447 S133200 | Open fracture pelvis, multiple pubic rami - unstable         |
| 17 | 39733 S35z.00  | Fracture of tarsal and metatarsal bones NOS                  |
| 18 | 49295 SD1y500  | Superficial injury of buttock NOS, without major open wound  |
| 19 | 93798 SH12C00  | Deep partial thickness burn of the eye                       |
| 20 | 27496 SB3..00  | Injury to blood vessels of arm                               |
| 21 | 44630 SK1EX00  | Injury of unspecified muscle and tendon at lower leg level   |
| 22 | 54834 N331700  | Fracture of bone in neoplastic disease                       |
| 23 | 34359 SJ31B00  | Thoracic nerve root injury - T12                             |
| 24 | 28066 S20z.00  | Fracture of clavicle NOS                                     |
| 25 | 96451 SH13800  | Full thickness burn of the cheek                             |
| 26 | 97729 SJ18.00  | Contusion of infraorbital nerve                              |
| 27 | 33616 S260K00  | Closed fracture finger middle phalanx                        |
| 28 | 56582 SJ30700  | Cervical nerve root injury - C8                              |
| 29 | 46852 S523C00  | Volar plate injury, finger, distal interphalangeal joint     |
| 30 | 41551 SA10.00  | Open wound of knee, leg and ankle without complication       |
| 31 | 72957 TN8y.00  | Injury ?accidental, by other specified means                 |
| 32 | 60197 SC2z.00  | Late effect of nervous system injury NOS                     |
| 33 | 96715 S735000  | Colon injury with open wound into cavity, unspecified        |
| 34 | 50413 7K6H000  | Revision to open reduction # dislocation+skeletal traction   |
| 35 | 66312 S002100  | Open #skull vlt no intracranial injury, no loss of consc     |
| 36 | 95529 S114100  | Closed spinal fracture with complete lumbar cord lesion      |
| 37 | 5445 S100100   | Closed fracture atlas                                        |
| 38 | 68668 S301y00  | Open fracture proximal femur, other transcervical            |
| 39 | 38398 S235600  | Open fracture radius and ulna, distal                        |
| 40 | 6380 S235B00   | Open fracture radial styloid                                 |
| 41 | 68655 SB30200  | Closed injury, axillary vein                                 |
| 42 | 69602 SH32900  | Deep partial thickness burn of the elbow                     |
| 43 | 31708 S29..11  | Multiple fractures of arm                                    |
| 44 | 37450 S352800  | Closed fracture talus, head                                  |
| 45 | 68532 SJ1y200  | Vagus (10th) nerve injury                                    |
| 46 | 15764 S23x.00  | Closed fracture of radius and ulna, unspecified part         |
| 47 | 40254 SH52100  | Superficial partial thickness burn of the toe(s)             |
| 48 | 58001 S80..12  | Periocular open wound                                        |
| 49 | 33680 S223.00  | Open fracture of humerus, shaft or unspecified part          |
| 50 | 39407 SE2y.00  | Contusion, multiple sites of trunk                           |
| 51 | 33687 S4B0.00  | Closed fracture-dislocation elbow                            |



|    |                |                                                              |
|----|----------------|--------------------------------------------------------------|
| 1  |                |                                                              |
| 2  | 9072 S10B400   | Fracture of acetabulum                                       |
| 3  | 65109 S73x011  | Injury to pancreas - closed                                  |
| 4  | 15188 SE11.00  | Contusion, eyelids and periocular tissues                    |
| 5  | 5122 S9...11   | Laceration of arm                                            |
| 6  | 7144 SE43.11   | Toenail bruise                                               |
| 7  |                |                                                              |
| 8  | 37355 SE30000  | Contusion, shoulder area                                     |
| 9  | 36485 SE4y.00  | Contusion, multiple sites NEC                                |
| 10 | 55397 SJ63400  | Open injury superficial peroneal nerve                       |
| 11 | 6868 S310.00   | Closed fracture of femur, shaft or unspecified part          |
| 12 | 101669 S770.00 | Bladder and urethra injury without open wound into cavity    |
| 13 | 66164 S10y.00  | Open fracture of spine, unspecified,                         |
| 14 | 69737 S012.00  | Open fracture base skull without mention intracranial injury |
| 15 | 54825 S911100  | Open wound of elbow with complication                        |
| 16 | 68049 SJX..00  | Injury of unspecified nerve of thorax                        |
| 17 | 18843 S9z..00  | Open wound of upper limb NOS                                 |
| 18 | 48499 SD61100  | Abrasion of thigh, infected                                  |
| 19 | 52322 S330900  | Closed fracture fibula, neck                                 |
| 20 | 7340 S342.00   | Closed fracture ankle, lateral malleolus                     |
| 21 | 66063 TKxy.00  | Suicide and selfinflicted injury by other specified means    |
| 22 | 3748 S233.00   | Open fracture of radius and ulna, shaft                      |
| 23 | 67009 S740200  | Liver minor laceration without open wound into cavity        |
| 24 | 104728 SB21000 | Inferior vena cava injury, unspecified                       |
| 25 | 94242 TN11.00  | Injury ?accidental, poisoning by liquid petrol gas           |
| 26 | 71583 S022600  | Closed fracture of mandible, symphysis of body               |
| 27 | 73253 SD1y000  | Superficial injury interscapular rgn NOS, without mj opn wnd |
| 28 | 33515 S044.00  | Multiple fractures involving skull and facial bones          |
| 29 | 72209 PA16.00  | Dislocation of tongue                                        |
| 30 | 100893 SH23z00 | Full thickness burn of the trunk NOS                         |
| 31 | 10631 SD30000  | Abrasion, elbow area                                         |
| 32 | 67665 SA12000  | Open wound of knee with tendon involvement                   |
| 33 | 39302 S494211  | Closed dislocation of sacroiliac joint                       |
| 34 | 95006 S100E00  | Closed fracture axis, posterior arch                         |
| 35 | 38353 S220z00  | Closed fracture of proximal humerus not otherwise specified  |
| 36 | 21738 SC44.00  | Sequelae of burns, corrosions and frostbite                  |
| 37 | 23842 SH32100  | Superficial partial thickness burn of the forearm            |
| 38 | 31758 SH10.00  | Unspecified thickness burn of the face, head or neck         |
| 39 | 73790 S645100  | Intracranial injury with prolonged coma with open wound      |
| 40 | 19206 SR1..00  | Fractures involving multiple body regions                    |
| 41 | 60078 SJ03.00  | Visual cortex injury                                         |
| 42 | 44329 S320200  | Closed fracture patella, distal pole                         |
| 43 | 17152 SD10B12  | Abrasion or friction burn of scrotum without infection       |
| 44 | 48180 S760200  | Kidney laceration without mention of open wound into cavity  |
| 45 | 53585 S903100  | Degloving injury, scapular area                              |
| 46 | 61751 SB23000  | Superior mesenteric vein injury                              |
| 47 | 6969 SH2z.00   | Burn of the trunk NOS                                        |
| 48 | 71622 S4J2.00  | Other closed fracture-subluxation                            |
| 49 | 43882 ZLEO111  | Discharge from head injury rehabilitation                    |
| 50 | 24234 SH86.00  | Burn involving 60-69% of body surface (BS)                   |
| 51 | 17217 SF20300  | Crush injury, upper arm                                      |
| 52 | 50951 SH13100  | Full thickness burn of the ear                               |

|    |                |                                                             |
|----|----------------|-------------------------------------------------------------|
| 1  |                |                                                             |
| 2  | 27886 S222100  | Closed fracture of humerus, shaft                           |
| 3  | 38426 7K6FK00  | Primary open reduction of # dislocation+external fixation   |
| 4  | 6103 SD6y200   | Superficial injury of knee NOS                              |
| 5  | 47886 SH31300  | Superficial burn of the upper arm                           |
| 6  | 65532 S032z00  | Open #skull NOS no intracranial inj + concussion unspec     |
| 7  | 43091 S112600  | Cls spinal fracture with unspec thoracic cord lesion, T7-12 |
| 8  | 67003 7K6H300  | Secondary open reduction traumatic dislocation of joint NEC |
| 9  | 29137 S220700  | Closed fracture proximal humerus, four part                 |
| 10 | 66957 SJ45.00  | Iliohypogastric nerve injury                                |
| 11 | 48861 S7z..00  | Internal injury of chest, abdomen or pelvis NOS             |
| 12 | 21029 TK...00  | Suicide and selfinflicted injury                            |
| 13 | 97331 N083511  | Hip - recurrent dislocation                                 |
| 14 | 71814 SD1z200  | Superficial injury of breast NOS, infected                  |
| 15 | 67036 S4B2000  | Closed fracture-subluxation elbow joint                     |
| 16 | 105701 S61..12 | Cortex laceration and contusion                             |
| 17 | 34078 S300900  | Closed fracture proximal femur, subcapital, Garden grade IV |
| 18 | 17823 SF23000  | Closed crush injury, finger                                 |
| 19 | 48916 SH11300  | Superficial burn of the lip(s)                              |
| 20 | 99081 S733.00  | Small intestine injury with open wound into cavity          |
| 21 | 21773 S3x2.00  | Multiple fractures of femur                                 |
| 22 | 11570 Z6G1800  | Dislocation - traction                                      |
| 23 | 22574 SH70000  | Burn of the mouth, unspecified                              |
| 24 |                |                                                             |
| 25 |                |                                                             |
| 26 |                |                                                             |
| 27 |                |                                                             |
| 28 |                |                                                             |
| 29 |                |                                                             |
| 30 |                |                                                             |
| 31 |                |                                                             |
| 32 |                |                                                             |
| 33 |                |                                                             |
| 34 |                |                                                             |
| 35 |                |                                                             |
| 36 |                |                                                             |
| 37 |                |                                                             |
| 38 |                |                                                             |
| 39 |                |                                                             |
| 40 |                |                                                             |
| 41 |                |                                                             |
| 42 |                |                                                             |
| 43 |                |                                                             |
| 44 |                |                                                             |
| 45 |                |                                                             |
| 46 |                |                                                             |
| 47 |                |                                                             |
| 48 |                |                                                             |
| 49 |                |                                                             |
| 50 |                |                                                             |
| 51 |                |                                                             |
| 52 |                |                                                             |
| 53 |                |                                                             |
| 54 |                |                                                             |
| 55 |                |                                                             |
| 56 |                |                                                             |
| 57 |                |                                                             |
| 58 |                |                                                             |
| 59 |                |                                                             |
| 60 |                |                                                             |

| <b>medcode</b> | <b>readcode</b> | <b>readterm</b>                                  |
|----------------|-----------------|--------------------------------------------------|
| 102371         | 8Hu..00         | Admission to accident and emergency department   |
| 18512          | 8H21.00         | Admit medical emergency unsp.                    |
| 29836          | 8H2E.00         | Admit neurology emergency                        |
| 8082           | 9N04.00         | Seen in emergency clinic                         |
| 60440          | 9N19.11         | Seen in accident and emergency department        |
| 9331           | ZL91.00         | Seen by accident and emergency doctor            |
| 314            | 8H2..00         | Emergency hospital admission                     |
| 105952         | 8H2X.00         | Emergency hospital admission from walk-in centre |
| 16588          | 9N1y300         | Seen in emergency clinic                         |

For peer review only

1  
2  
3  
4  
5  
6  
7  
8  
9  
10  
11  
12  
13  
14  
15  
16  
17  
18  
19  
20  
21  
22  
23  
24  
25  
26  
27  
28  
29  
30  
31  
32  
33  
34  
35  
36  
37  
38  
39  
40  
41  
42  
43  
44  
45  
46  
47  
48  
49  
50  
51  
52  
53  
54  
55  
56  
57  
58  
59  
60

| <b>medcode</b> | <b>readcode</b> | <b>readterm</b>    |
|----------------|-----------------|--------------------|
| 4093           | F253.11         | Status epilepticus |

For peer review only

1  
2 **medcode readcode readterm**  
3 11015 667F.00 Seizure free >12 months  
4  
5  
6  
7  
8  
9  
10  
11  
12  
13  
14  
15  
16  
17  
18  
19  
20  
21  
22  
23  
24  
25  
26  
27  
28  
29  
30  
31  
32  
33  
34  
35  
36  
37  
38  
39  
40  
41  
42  
43  
44  
45  
46  
47  
48  
49  
50  
51  
52  
53  
54  
55  
56  
57  
58  
59  
60

For peer review only

|    | <b>medcode</b> | <b>readcode</b> | <b>readterm</b>                                           | <b>smoking</b> |
|----|----------------|-----------------|-----------------------------------------------------------|----------------|
| 1  |                |                 |                                                           |                |
| 2  |                |                 |                                                           |                |
| 3  | 33             | 1371            | Never smoked tobacco                                      | 0              |
| 4  | 60             | 137L.00         | Current non-smoker                                        | 0              |
| 5  | 90             | 137S.00         | Ex smoker                                                 | 0              |
| 6  |                |                 |                                                           |                |
| 7  | 776            | 137K.00         | Stopped smoking                                           | 0              |
| 8  | 11788          | 1371.11         | Non-smoker                                                | 0              |
| 9  | 12946          | 137F.00         | Ex-smoker - amount unknown                                | 0              |
| 10 | 12961          | 1377            | Ex-trivial smoker (<1/day)                                | 0              |
| 11 | 26470          | 137N.00         | Ex pipe smoker                                            | 0              |
| 12 |                |                 |                                                           |                |
| 13 | 97210          | 137j.00         | Ex-cigarette smoker                                       | 0              |
| 14 | 54             | 137..00         | Tobacco consumption                                       | 1              |
| 15 | 93             | 137P.00         | Cigarette smoker                                          | 1              |
| 16 | 1822           | 1376            | Very heavy smoker - 40+cigs/d                             | 1              |
| 17 | 1823           | 137P.11         | Smoker                                                    | 1              |
| 18 |                |                 |                                                           |                |
| 19 | 1878           | 1374            | Moderate smoker - 10-19 cigs/d                            | 1              |
| 20 | 2111           | 6791            | Health ed. - smoking                                      | 1              |
| 21 | 3568           | 1375            | Heavy smoker - 20-39 cigs/day                             | 1              |
| 22 | 7622           | 8CAL.00         | Smoking cessation advice                                  | 1              |
| 23 | 10211          | 13p..00         | Smoking cessation milestones                              | 1              |
| 24 |                |                 |                                                           |                |
| 25 | 10558          | 137R.00         | Current smoker                                            | 1              |
| 26 | 10742          | 8HTK.00         | Referral to stop-smoking clinic                           | 1              |
| 27 | 12240          | 137G.00         | Trying to give up smoking                                 | 1              |
| 28 | 12941          | 1372.11         | Occasional smoker                                         | 1              |
| 29 | 12942          | 137..11         | Smoker - amount smoked                                    | 1              |
| 30 |                |                 |                                                           |                |
| 31 | 12943          | 137J.00         | Cigar smoker                                              | 1              |
| 32 | 12944          | 1373            | Light smoker - 1-9 cigs/day                               | 1              |
| 33 | 12945          | 137M.00         | Rolls own cigarettes                                      | 1              |
| 34 | 12947          | 137H.00         | Pipe smoker                                               | 1              |
| 35 | 12951          | 137Q.11         | Smoking restarted                                         | 1              |
| 36 | 12952          | 137Q.00         | Smoking started                                           | 1              |
| 37 |                |                 |                                                           |                |
| 38 | 12953          | 9001.00         | Attends stop smoking monitor.                             | 1              |
| 39 | 12954          | ZV4K000         | [V]Tobacco use                                            | 1              |
| 40 | 12955          | 1379            | Ex-moderate smoker (10-19/day)                            | 1              |
| 41 | 12956          | 137A.00         | Ex-heavy smoker (20-39/day)                               | 1              |
| 42 | 12957          | 1378            | Ex-light smoker (1-9/day)                                 | 1              |
| 43 | 12958          | 1372            | Trivial smoker - < 1 cig/day                              | 1              |
| 44 | 12959          | 137B.00         | Ex-very heavy smoker (40+/day)                            | 1              |
| 45 | 12960          | 137Z.00         | Tobacco consumption NOS                                   | 1              |
| 46 | 12963          | 137Y.00         | Cigar consumption                                         | 1              |
| 47 |                |                 |                                                           |                |
| 48 | 12964          | 137C.00         | Keeps trying to stop smoking                              | 1              |
| 49 | 12965          | 137X.00         | Cigarette consumption                                     | 1              |
| 50 | 12966          | 137V.00         | Smoking reduced                                           | 1              |
| 51 | 12967          | 137a.00         | Pipe tobacco consumption                                  | 1              |
| 52 |                |                 |                                                           |                |
| 53 | 30423          | 137c.00         | Thinking about stopping smoking                           | 1              |
| 54 | 30762          | 137d.00         | Not interested in stopping smoking                        | 1              |
| 55 |                |                 |                                                           |                |
| 56 | 31114          | 137b.00         | Ready to stop smoking                                     | 1              |
| 57 | 32083          | 900..11         | Stop smoking clinic admin.                                | 1              |
| 58 | 38112          | 13p5.00         | Smoking cessation programme start date                    | 1              |
| 59 | 40417          | 9003.00         | Stop smoking monitor default                              | 1              |
| 60 | 41042          | 8CAg.00         | Smoking cessation advice provided by community pharmacist | 1              |

|    |       |         |                                                      |   |
|----|-------|---------|------------------------------------------------------|---|
| 1  |       |         |                                                      |   |
| 2  | 41979 | 137e.00 | Smoking restarted                                    | 1 |
| 3  | 42722 | 9004.00 | Stop smoking monitor 1st lettr                       | 1 |
| 4  | 53101 | 9007.00 | Stop smoking monitor verb.inv.                       | 1 |
| 5  | 58597 | 9008.00 | Stop smoking monitor phone inv                       | 1 |
| 6  | 60720 | 9005.00 | Stop smoking monitor 2nd lettr                       | 1 |
| 7  |       |         |                                                      |   |
| 8  | 62686 | 137h.00 | Minutes from waking to first tobacco consumption     | 1 |
| 9  | 66387 | 9006.00 | Stop smoking monitor 3rd lettr                       | 1 |
| 10 | 74907 | 745H.00 | Smoking cessation therapy                            | 1 |
| 11 | 90522 | 745Hz00 | Smoking cessation therapy NOS                        | 1 |
| 12 |       |         |                                                      |   |
| 13 | 91708 | 745Hy00 | Other specified smoking cessation therapy            | 1 |
| 14 | 94958 | 745H400 | Smoking cessation drug therapy                       | 1 |
| 15 | 96992 | 9kc..00 | Smoking cessation - enhanced services administration | 1 |
| 16 | 98154 | 8HkQ.00 | Referral to NHS stop smoking service                 | 1 |
| 17 | 98245 | 8HBM.00 | Stop smoking face to face follow-up                  | 1 |
| 18 |       |         |                                                      |   |
| 19 |       |         |                                                      |   |
| 20 |       |         |                                                      |   |
| 21 |       |         |                                                      |   |
| 22 |       |         |                                                      |   |
| 23 |       |         |                                                      |   |
| 24 |       |         |                                                      |   |
| 25 |       |         |                                                      |   |
| 26 |       |         |                                                      |   |
| 27 |       |         |                                                      |   |
| 28 |       |         |                                                      |   |
| 29 |       |         |                                                      |   |
| 30 |       |         |                                                      |   |
| 31 |       |         |                                                      |   |
| 32 |       |         |                                                      |   |
| 33 |       |         |                                                      |   |
| 34 |       |         |                                                      |   |
| 35 |       |         |                                                      |   |
| 36 |       |         |                                                      |   |
| 37 |       |         |                                                      |   |
| 38 |       |         |                                                      |   |
| 39 |       |         |                                                      |   |
| 40 |       |         |                                                      |   |
| 41 |       |         |                                                      |   |
| 42 |       |         |                                                      |   |
| 43 |       |         |                                                      |   |
| 44 |       |         |                                                      |   |
| 45 |       |         |                                                      |   |
| 46 |       |         |                                                      |   |
| 47 |       |         |                                                      |   |
| 48 |       |         |                                                      |   |
| 49 |       |         |                                                      |   |
| 50 |       |         |                                                      |   |
| 51 |       |         |                                                      |   |
| 52 |       |         |                                                      |   |
| 53 |       |         |                                                      |   |
| 54 |       |         |                                                      |   |
| 55 |       |         |                                                      |   |
| 56 |       |         |                                                      |   |
| 57 |       |         |                                                      |   |
| 58 |       |         |                                                      |   |
| 59 |       |         |                                                      |   |
| 60 |       |         |                                                      |   |



**prodcode productname**

63069 Rewisca 75mg capsules (Consilient Health Ltd)  
63088 Rewisca 50mg capsules (Consilient Health Ltd)  
63089 Rewisca 300mg capsules (Consilient Health Ltd)  
63090 Rewisca 150mg capsules (Consilient Health Ltd)  
63091 Rewisca 100mg capsules (Consilient Health Ltd)  
63174 Rewisca 200mg capsules (Consilient Health Ltd)  
63300 Rewisca 25mg capsules (Consilient Health Ltd)  
63317 Rewisca 225mg capsules (Consilient Health Ltd)  
63877 Pregabalin 50mg capsules (A A H Pharmaceuticals Ltd)  
63964 Alzain 25mg capsules (Dr Reddy's Laboratories (UK) Ltd)  
63965 Alzain 100mg capsules (Dr Reddy's Laboratories (UK) Ltd)  
64005 Pregabalin 100mg capsules (A A H Pharmaceuticals Ltd)  
64037 Alzain 300mg capsules (Dr Reddy's Laboratories (UK) Ltd)  
64038 Alzain 225mg capsules (Dr Reddy's Laboratories (UK) Ltd)  
64039 Alzain 150mg capsules (Dr Reddy's Laboratories (UK) Ltd)  
64040 Alzain 75mg capsules (Dr Reddy's Laboratories (UK) Ltd)  
64041 Alzain 50mg capsules (Dr Reddy's Laboratories (UK) Ltd)  
64042 Alzain 200mg capsules (Dr Reddy's Laboratories (UK) Ltd)  
65069 Pregabalin 75mg capsules (Teva UK Ltd)  
65073 Pregabalin 25mg capsules (Teva UK Ltd)  
65218 Lecaent 50mg capsules (Actavis UK Ltd)  
790 Pregabalin 25mg capsules  
819 Pregabalin 75mg capsules  
6631 Pregabalin 150mg capsules  
6936 Pregabalin 50mg capsules  
6949 Pregabalin 200mg capsules  
6999 Pregabalin 100mg capsules  
7005 Pregabalin 300mg capsules  
37801 Pregabalin 225mg capsules  
55972 Pregabalin 150mg/5ml oral solution  
60543 Pregabalin 75mg/5ml oral solution  
64285 Pregabalin 150mg/5ml oral suspension  
65606 Pregabalin 50mg capsules (Accord Healthcare Ltd)  
65787 Pregabalin 50mg capsules (Sandoz Ltd)  
66509 Pregabalin 75mg capsules (Zentiva)  
6584 Lyrica 75mg capsules (Pfizer Ltd)  
7208 Lyrica 100mg capsules (Pfizer Ltd)  
7209 Lyrica 50mg capsules (Pfizer Ltd)  
7394 Lyrica 200mg capsules (Pfizer Ltd)  
10189 Lyrica 300mg capsules (Pfizer Ltd)  
16509 Lyrica 150mg capsules (Pfizer Ltd)  
16542 Lyrica 25mg capsules (Pfizer Ltd)  
38293 Lyrica 225mg capsules (Pfizer Ltd)  
48253 Lyrica 150mg capsules (Lexon (UK) Ltd)  
52547 Lyrica 50mg capsules (Waymade Healthcare Plc)  
64497 Lyrica 75mg capsules (Waymade Healthcare Plc)  
64568 Lyrica 150mg capsules (Sigma Pharmaceuticals Plc)  
65863 Lyrica 75mg capsules (Stephar (U.K.) Ltd)  
51227 Pregabalin 20mg/ml oral solution sugar free

1  
2 51924 Lyrica 20mg/ml oral solution (Pfizer Ltd)  
3 9110 Nydrane 500mg Tablet (Lipha Pharmaceuticals Ltd)  
4 9212 Beclamide 500mg tablets  
5 12931 Epimaz Retard 200mg tablets (IVAX Pharmaceuticals UK Ltd)  
6 12932 Epimaz 100mg tablets (IVAX Pharmaceuticals UK Ltd)  
7 15082 Tegretol 250mg suppositories (Novartis Pharmaceuticals UK Ltd)  
8 17428 Carbamazepine 250mg suppositories  
9 17429 Carbamazepine 125mg suppositories  
10 17978 Teril Retard 200mg tablets (Taro Pharmaceuticals (UK) Ltd)  
11 18011 Teril Retard 400mg tablets (Taro Pharmaceuticals (UK) Ltd)  
12 18762 Epimaz 200mg tablets (Teva UK Ltd)  
13 18763 Epimaz 400mg tablets (Teva UK Ltd)  
14 21441 Tegretol 125mg suppositories (Novartis Pharmaceuticals UK Ltd)  
15 28345 Carbamazepine 100mg tablets (Teva UK Ltd)  
16 32931 Carbamazepine 400mg tablets (Teva UK Ltd)  
17 432 Carbamazepine 100mg tablets  
18 596 Carbamazepine 100mg/5ml oral suspension sugar free  
19 652 Carbamazepine 400mg tablets  
20 1158 Carbamazepine 200mg tablets  
21 2085 Tegretol 200mg tablets (Novartis Pharmaceuticals UK Ltd)  
22 2388 Carbamazepine 200mg modified-release tablets  
23 3569 Carbamazepine 400mg modified-release tablets  
24 4066 Tegretol 400mg tablets (Novartis Pharmaceuticals UK Ltd)  
25 4913 Tegretol 100mg/5ml liquid (Novartis Pharmaceuticals UK Ltd)  
26 4982 Carbamazepine 100mg chewable tablets sugar free  
27 5977 Tegretol 100mg tablets (Novartis Pharmaceuticals UK Ltd)  
28 11696 Carbamazepine 200mg chewable tablets sugar free  
29 12880 Tegretol 200mg Chewtabs (Novartis Pharmaceuticals UK Ltd)  
30 13112 Carbagen SR 200mg tablets (Mylan Ltd)  
31 13524 Tegretol 100mg Chewtabs (Novartis Pharmaceuticals UK Ltd)  
32 26012 Carbagen SR 400mg tablets (Mylan Ltd)  
33 30763 Carbamazepine 100mg tablets (A A H Pharmaceuticals Ltd)  
34 34370 Carbamazepine 200mg modified-release tablets (A A H Pharmaceuticals Ltd)  
35 34904 Carbamazepine 200mg tablets (A A H Pharmaceuticals Ltd)  
36 37058 Carbamazepine 500mg/5ml oral suspension  
37 40404 Carbamazepine 400mg modified-release tablets (A A H Pharmaceuticals Ltd)  
38 43417 Carbamazepine 400mg tablets (A A H Pharmaceuticals Ltd)  
39 45903 Tegretol Prolonged Release 400mg tablets (Novartis Pharmaceuticals UK Ltd)  
40 45941 Tegretol Prolonged Release 200mg tablets (Novartis Pharmaceuticals UK Ltd)  
41 48397 Tegretol Prolonged Release 200mg tablets (DE Pharmaceuticals)  
42 49833 Tegretol 200mg tablets (Lexon (UK) Ltd)  
43 51760 Tegretol 400mg tablets (Lexon (UK) Ltd)  
44 52840 Tegretol Prolonged Release 400mg tablets (Necessity Supplies Ltd)  
45 53492 Tegretol Prolonged Release 200mg tablets (Sigma Pharmaceuticals Plc)  
46 53893 Tegretol Prolonged Release 400mg tablets (Stephar (U.K.) Ltd)  
47 54445 Carbamazepine 400mg tablets (Sigma Pharmaceuticals Plc)  
48 55904 Carbamazepine 100mg tablets (Mylan Ltd)  
49 56734 Carbamazepine 100mg tablets (Phoenix Healthcare Distribution Ltd)  
50 57726 Tegretol Prolonged Release 200mg tablets (Mawdsley-Brooks & Company Ltd)  
51 58515 Tegretol 100mg/5ml liquid (Lexon (UK) Ltd)  
52  
53  
54  
55  
56  
57  
58  
59  
60

1  
2 59038 Carbamazepine 100mg/5ml oral suspension sugar free (A A H Pharmaceuticals Ltd)  
3 59211 Carbamazepine 200mg tablets (Alliance Healthcare (Distribution) Ltd)  
4 59428 Carbamazepine 100mg tablets (Almus Pharmaceuticals Ltd)  
5 59429 Carbamazepine 200mg tablets (Almus Pharmaceuticals Ltd)  
6 59430 Carbamazepine 400mg tablets (Almus Pharmaceuticals Ltd)  
7 59696 Carbamazepine 400mg tablets (Kent Pharmaceuticals Ltd)  
8 59697 Carbamazepine 10mg/5ml oral suspension  
9 59745 Carbamazepine 100mg/5ml oral suspension sugar free (DE Pharmaceuticals)  
10 59746 Carbamazepine 100mg tablets (DE Pharmaceuticals)  
11 59887 Carbamazepine 200mg tablets (Mylan Ltd)  
12 60133 Tegretol Prolonged Release 400mg tablets (Sigma Pharmaceuticals Plc)  
13 60181 Carbagen 100mg tablets (Mylan Ltd)  
14 60187 Carbagen 200mg tablets (Mylan Ltd)  
15 60405 Carbagen 400mg tablets (Mylan Ltd)  
16 61143 Carbamazepine 100mg tablets (Actavis UK Ltd)  
17 61377 Carbamazepine 100mg tablets (Kent Pharmaceuticals Ltd)  
18 62457 Carbamazepine 100mg tablets (Alliance Healthcare (Distribution) Ltd)  
19 62538 Carbamazepine 200mg tablets (Actavis UK Ltd)  
20 63213 Tegretol 200mg tablets (Necessity Supplies Ltd)  
21 63341 Tegretol Prolonged Release 200mg tablets (Lexon (UK) Ltd)  
22 63735 Carbamazepine 400mg tablets (Alliance Healthcare (Distribution) Ltd)  
23 63930 Tegretol 100mg/5ml liquid (DE Pharmaceuticals)  
24 66058 Carbamazepine 200mg tablets (DE Pharmaceuticals)  
25 66073 Carbamazepine 400mg tablets (DE Pharmaceuticals)  
26 66375 Carbamazepine 400mg modified-release tablets (Phoenix Healthcare Distributic  
27 2823 Tegretol retard 200mg Modified-release tablet (Novartis Pharmaceuticals UK Lt  
28 2824 Tegretol retard 400mg Modified-release tablet (Novartis Pharmaceuticals UK Lt  
29 30509 Timonil retard 400mg Modified-release tablet (C P Pharmaceuticals Ltd)  
30 32900 Carbamazepine sr 200mg Tablet (IVAX Pharmaceuticals UK Ltd)  
31 34958 Carbamazepine 100mg Tablet (Berk Pharmaceuticals Ltd)  
32 37800 Carbamazepine 200mg Modified-release tablet (Lagap)  
33 40403 Carbamazepine 400mg Modified-release tablet (Lagap)  
34 41726 Carbamazepine 100mg Tablet (IVAX Pharmaceuticals UK Ltd)  
35 43451 Carbamazepine 400mg Modified-release tablet (Generics (UK) Ltd)  
36 46888 Carbamazepine 200mg Modified-release tablet (Generics (UK) Ltd)  
37 46972 Carbamazepine 200mg Tablet (IVAX Pharmaceuticals UK Ltd)  
38 47294 Carbamazepine sr 400mg Tablet (IVAX Pharmaceuticals UK Ltd)  
39 53188 Carbamazepine 500mg/5ml Oral suspension (Martindale Pharmaceuticals Ltd)  
40 3110 Clobazam 10mg capsules  
41 8487 Frisium 10mg Capsule (Aventis Pharma)  
42 54934 Tapclob 5mg/5ml oral suspension (Martindale Pharmaceuticals Ltd)  
43 55481 Clobazam 10mg/5ml oral suspension sugar free  
44 56781 Tapclob 10mg/5ml oral suspension (Martindale Pharmaceuticals Ltd)  
45 64879 Clobazam 5mg/5ml oral suspension sugar free (A A H Pharmaceuticals Ltd)  
46 3111 Clobazam 10mg tablets  
47 14388 Frisium 10mg tablets (Sanofi)  
48 17054 Clobazam 5mg/5ml oral suspension  
49 20966 Clobazam 10mg/5ml oral suspension  
50 37696 Clobazam 2.5mg capsules  
51 41303 Clobazam 25mg/5ml oral solution

1  
2 46796 Clobazam 10mg/5ml oral solution  
3 46850 Clobazam 5mg/5ml oral solution  
4 48010 Clobazam 25mg/5ml oral suspension  
5 50389 Clobazam 4mg/5ml oral solution  
6 51425 Clobazam 2.5mg/5ml oral solution  
7 52052 Clobazam 4mg/5ml oral suspension  
8 52056 Clobazam 2.5mg/5ml oral suspension  
9 52093 Clobazam 100mg/5ml oral suspension  
10 57510 Frisium 10mg tablets (Waymade Healthcare Plc)  
11 60320 Clobazam 5mg/5ml oral suspension (Special Order)  
12 62926 Clobazam 7.5mg/5ml oral suspension  
13 19324 Clomethiazole 8mg/ml IV infusion  
14 26399 Heminevrin 8mg/ml Intravenous infusion (AstraZeneca UK Ltd)  
15 1559 Clonazepam 500microgram tablets  
16 2073 Clonazepam 2mg tablets  
17 4483 Clonazepam 2.5mg/ml drops sugar free  
18 8029 Rivotril 2mg tablets (Roche Products Ltd)  
19 10650 Rivotril 500microgram tablets (Roche Products Ltd)  
20 13200 Clonazepam 2mg/5ml oral solution sugar free  
21 14743 Clonazepam 500micrograms/5ml oral suspension  
22 17038 Rivotril 2.5mg/1ml drops (Imported (Switzerland))  
23 17637 Clonazepam 500micrograms/5ml solution sugar free  
24 32500 Clonazepam 250micrograms/5ml oral solution  
25 34491 Clonazepam 2mg/5ml oral solution sugar free (Rosemont Pharmaceuticals Ltd)  
26 45077 Clonazepam 500microgram/5ml Oral solution (Rosemont Pharmaceuticals Ltd)  
27 47066 Clonazepam 500micrograms/5ml oral solution  
28 48544 Clonazepam 500micrograms/5ml oral solution sugar free  
29 50108 Clonazepam 2mg/5ml oral solution sugar free  
30 53311 Clonazepam 500microgram tablets (Phoenix Healthcare Distribution Ltd)  
31 53739 Clonazepam 2mg tablets (Sigma Pharmaceuticals Plc)  
32 57664 Clonazepam 250micrograms/5ml oral suspension  
33 58460 Clonazepam 312.5micrograms/5ml oral suspension  
34 58482 Clonazepam 500microgram tablets (A A H Pharmaceuticals Ltd)  
35 59396 Clonazepam 500microgram tablets (Almus Pharmaceuticals Ltd)  
36 61626 Clonazepam 500microgram tablets (Actavis UK Ltd)  
37 64505 Clonazepam 5mg/5ml oral suspension  
38 65238 Clonazepam 10mg/5ml oral solution  
39 816 Clonazepam 1mg/1ml solution for injection ampoules and diluent  
40 26496 Rivotril 1mg/1ml concentrate for solution for injection ampoules (Roche Produc  
41 2630 Dixarit 25microgram tablets (Boehringer Ingelheim Ltd)  
42 5793 Stesolid 10mg Rectal tubes (Dumex Ltd)  
43 8344 Diazepam 5mg suppository  
44 16610 Valium 5mg/ml Injection (Roche Products Ltd)  
45 16734 Diazepam rectubes 20mg Rectal tubes (C P Pharmaceuticals Ltd)  
46 20514 Valium 10mg Suppository (Roche Products Ltd)  
47 23820 Diazepam 20mg rectal tubes  
48 28698 Valium 5mg Suppository (Roche Products Ltd)  
49 38410 Diazepam 5mg Rectal tubes (Hillcross Pharmaceuticals Ltd)  
50 41689 Diazepam 10mg Suppository (Sinclair IS Pharma Plc)  
51 46 Diazepam 2mg tablets

1  
2 47 Diazepam 5mg tablets  
3 1400 Diazepam 10mg tablets  
4 3973 Tensium 10mg tablets (DDSA Pharmaceuticals Ltd)  
5 9065 Diazepam 5mg/5ml oral solution  
6  
7 12124 Diazepam 10mg/2ml solution for injection ampoules  
8 29945 Diazepam 2mg tablets (Ranbaxy (UK) Ltd)  
9 32296 Diazepam 5mg tablets (Actavis UK Ltd)  
10 32417 Diazepam 10mg/2ml solution for injection ampoules (Wockhardt UK Ltd)  
11 33672 Diazepam 2mg tablets (A A H Pharmaceuticals Ltd)  
12 34293 Diazepam 10mg tablets (Mylan Ltd)  
13 34335 Diazepam 2mg tablets (Teva UK Ltd)  
14 34338 Diazepam 2mg tablets (Mylan Ltd)  
15 34340 Diazepam 10mg tablets (Ranbaxy (UK) Ltd)  
16 34482 Diazepam 5mg tablets (Teva UK Ltd)  
17 34524 Diazepam 2mg tablets (Actavis UK Ltd)  
18 34615 Diazepam 5mg tablets (Mylan Ltd)  
19 34635 Diazepam 5mg tablets (A A H Pharmaceuticals Ltd)  
20 34677 Diazepam 2mg tablets (IVAX Pharmaceuticals UK Ltd)  
21 34807 Diazepam 10mg tablets (Actavis UK Ltd)  
22 41607 Diazepam 10mg tablets (Teva UK Ltd)  
23 41632 Diazepam 10mg tablets (A A H Pharmaceuticals Ltd)  
24 42503 Diazepam 5mg/5ml oral solution (A A H Pharmaceuticals Ltd)  
25 45218 Diazepam 5mg tablets (Ranbaxy (UK) Ltd)  
26 45244 Diazepam 5mg tablets (Sandoz Ltd)  
27 45313 Diazepam 2mg tablets (Almus Pharmaceuticals Ltd)  
28 46913 Diazepam 10mg tablets (IVAX Pharmaceuticals UK Ltd)  
29 46966 Diazepam 5mg tablets (IVAX Pharmaceuticals UK Ltd)  
30 51754 Diazepam 10mg/2ml solution for injection ampoules (A A H Pharmaceuticals Ltd)  
31 56236 Diazepam 2mg tablets (Wockhardt UK Ltd)  
32 57749 Diazepam 5mg tablets (Waymade Healthcare Plc)  
33 57838 Diazepam 5mg tablets (Sovereign Medical Ltd)  
34 59122 Diazepam 5mg/5ml oral solution (AM Distributions (Yorkshire) Ltd)  
35 59407 Diazepam 5mg tablets (DE Pharmaceuticals)  
36 60936 Diazepam 5mg tablets (Arrow Generics Ltd)  
37 62216 Diazepam 10mg tablets (Almus Pharmaceuticals Ltd)  
38 62541 Diazepam 2mg tablets (Sovereign Medical Ltd)  
39 63238 Diazepam 2mg tablets (Waymade Healthcare Plc)  
40 63694 Diazepam 2mg tablets (Phoenix Healthcare Distribution Ltd)  
41 64200 Diazepam 2mg tablets (Alliance Healthcare (Distribution) Ltd)  
42 2078 Diazepam 5mg RecTubes (Wockhardt UK Ltd)  
43 2083 Diazepam 10mg RecTubes (Wockhardt UK Ltd)  
44 2352 Diazepam 2mg/5ml oral solution  
45 4176 Diazepam 10mg/2.5ml rectal solution tube  
46 4395 Stesolid 5mg rectal tube (Actavis UK Ltd)  
47 5842 Diazepam 2.5mg/1.25ml rectal solution tube  
48 6747 Diazepam 5mg/2.5ml rectal solution tube  
49 8334 Diazepam 10mg suppositories  
50 8345 Stesolid 10mg rectal tube (Actavis UK Ltd)  
51 9430 Diazepam 2.5mg/5ml oral suspension  
52 12237 Diazepam 10mg/2ml emulsion for injection ampoules



1  
2 12849 Diazepam 10mg/5ml oral suspension  
3 13756 Diazemuls 10mg/2ml emulsion for injection ampoules (Actavis UK Ltd)  
4 18488 Diazepam 2.5mg RecTubes (Wockhardt UK Ltd)  
5 32853 Diazepam 2mg/5ml oral solution (Sandoz Ltd)  
6 33776 Diazepam 10mg/2ml solution for injection ampoules (Hameln Pharmaceuticals)  
7 34033 Diazepam 5mg/2.5ml rectal solution tube (Sandoz Ltd)  
8 34045 Diazepam 5mg/5ml oral solution (Sandoz Ltd)  
9 34614 Diazepam 10mg/2.5ml rectal solution tube (Sandoz Ltd)  
10 51335 Diazepam 10mg/5ml oral solution  
11 53566 Diazepam 2.5mg/5ml oral solution  
12 58959 Diazepam 10mg/5ml oral solution (AM Distributions (Yorkshire) Ltd)  
13 41758 Eslicarbazepine 800mg tablets  
14 42145 Zebinix 800mg tablets (Eisai Ltd)  
15 3108 Ethosuximide 250mg capsules  
16 3446 Zarontin 250mg capsules (Pfizer Ltd)  
17 5791 Ethosuximide 250mg/5ml oral solution  
18 5956 Zarontin 250mg/5ml syrup (Pfizer Ltd)  
19 18729 Emeside 250mg/5ml Oral solution (Laboratories For Applied Biology Ltd)  
20 18911 Emeside 250mg capsules (Chemidex Pharma Ltd)  
21 26302 Emeside 250mg Capsule (Laboratories For Applied Biology Ltd)  
22 33828 Emeside 250mg/5ml syrup (Essential Pharma Ltd)  
23 53066 Felbamate 600mg tablets  
24 25903 Fosphenytoin 750mg/10ml solution for injection vials  
25 27967 Pro-Epanutin 750mg/10ml concentrate for solution for injection vials (Pfizer Ltd)  
26 660 Gabapentin 100mg capsules  
27 1584 Gabapentin 300mg capsules  
28 4781 Gabapentin 400mg capsules  
29 5221 Gabapentin 600mg tablets  
30 6304 Neurontin 300mg capsules (Pfizer Ltd)  
31 7538 Gabapentin 800mg tablets  
32 10007 Neurontin 100mg capsules (Pfizer Ltd)  
33 16215 Neurontin 400mg capsules (Pfizer Ltd)  
34 17564 Neurontin 600mg tablets (Pfizer Ltd)  
35 18211 Gabapentin 250mg/5ml oral solution  
36 25815 Gabapentin 400mg/5ml oral suspension  
37 27454 Gabapentin 300mg capsules (Teva UK Ltd)  
38 28713 Neurontin 800mg tablets (Pfizer Ltd)  
39 34506 Gabapentin 100mg capsules (Teva UK Ltd)  
40 34606 Gabapentin 100mg capsules (A A H Pharmaceuticals Ltd)  
41 34716 Gabapentin 300mg capsules (A A H Pharmaceuticals Ltd)  
42 34946 Gabapentin 600mg tablets (Teva UK Ltd)  
43 44022 Gabapentin 250mg/5ml oral suspension  
44 44187 Gabapentin 600mg tablets (A A H Pharmaceuticals Ltd)  
45 44261 Gabapentin 250mg/5ml Oral solution (Boots Pharmaceuticals Ltd)  
46 47579 Gabapentin 100mg capsules (Sandoz Ltd)  
47 48035 Gabapentin 300mg capsules (Mylan Ltd)  
48 48060 Gabapentin 300mg capsules (Sandoz Ltd)  
49 51118 Gabapentin 300mg capsules (Ranbaxy (UK) Ltd)  
50 53296 Gabapentin 300mg capsules (Actavis UK Ltd)  
51 53784 Gabapentin 300mg/5ml oral solution

1  
2 55624 Gabapentin 300mg capsules (Bristol Laboratories Ltd)  
3 57120 Gabapentin 100mg capsules (Mylan Ltd)  
4 57527 Neurontin 300mg capsules (Dowelhurst Ltd)  
5 57649 Gabapentin 300mg capsules (Arrow Generics Ltd)  
6 58382 Gabapentin 100mg capsules (Actavis UK Ltd)  
7 58383 Gabapentin 400mg capsules (Almus Pharmaceuticals Ltd)  
8 58472 Gabapentin 300mg/5ml oral suspension  
9 58960 Gabapentin 100mg capsules (Zentiva)  
10 59147 Gabapentin 600mg tablets (Zentiva)  
11 60389 Gabapentin 300mg capsules (Creo Pharma Ltd)  
12 61266 Gabapentin 300mg capsules (Waymade Healthcare Plc)  
13 63432 Gabapentin 300mg capsules (Zentiva)  
14 64213 Gabapentin 600mg tablets (DE Pharmaceuticals)  
15 64302 Gabapentin 300mg capsules (Alliance Healthcare (Distribution) Ltd)  
16 64306 Gabapentin 50mg/ml oral solution sugar free (Alliance Healthcare (Distribution))  
17 64981 Gabapentin 100mg/5ml oral solution  
18 38789 Lacosamide 50mg tablets  
19 39126 Lacosamide 100mg tablets  
20 39259 Lacosamide 150mg tablets  
21 39356 Vimpat 100mg tablets (UCB Pharma Ltd)  
22 39385 Lacosamide 200mg tablets  
23 39615 Vimpat 50mg tablets (UCB Pharma Ltd)  
24 39952 Vimpat 15mg/ml syrup (UCB Pharma Ltd)  
25 40291 Lacosamide 200mg/20ml solution for infusion vials  
26 40372 Lacosamide 15mg/ml oral solution sugar free  
27 40658 Vimpat 200mg tablets (UCB Pharma Ltd)  
28 41162 Vimpat 150mg tablets (UCB Pharma Ltd)  
29 49084 Lacosamide 10mg/ml oral solution sugar free  
30 52473 Vimpat 10mg/ml syrup (UCB Pharma Ltd)  
31 2079 Lamotrigine 25mg tablets  
32 2080 Lamotrigine 50mg tablets  
33 2081 Lamotrigine 5mg dispersible tablets sugar free  
34 3886 Lamotrigine 200mg tablets  
35 4586 Lamictal 25mg tablets (GlaxoSmithKline UK Ltd)  
36 5076 Lamotrigine 100mg tablets  
37 5658 Lamotrigine 25mg dispersible tablets sugar free  
38 5722 Lamictal 100mg dispersible tablets (GlaxoSmithKline UK Ltd)  
39 5907 Lamotrigine 100mg dispersible tablets sugar free  
40 6409 Lamotrigine 2mg dispersible tablets sugar free  
41 7022 Lamictal 50mg tablets (GlaxoSmithKline UK Ltd)  
42 7023 Lamictal 100mg tablets (GlaxoSmithKline UK Ltd)  
43 10111 Lamictal 200mg tablets (GlaxoSmithKline UK Ltd)  
44 11445 Lamictal 25mg dispersible tablets (GlaxoSmithKline UK Ltd)  
45 15126 Lamictal 5mg dispersible tablets (GlaxoSmithKline UK Ltd)  
46 16149 Lamotrigine 50mg dispersible tablets sugar free  
47 19296 Lamictal 2mg dispersible tablets (GlaxoSmithKline UK Ltd)  
48 29619 Lamotrigine 25mg tablets (Actavis UK Ltd)  
49 29620 Lamotrigine 100mg tablets (Actavis UK Ltd)  
50 32920 Lamotrigine 25mg tablets (Mylan Ltd)  
51 35732 Lamotrigine 25mg dispersible tablets sugar free (Arrow Generics Ltd)  
52  
53  
54  
55  
56  
57  
58  
59  
60



1  
2 39506 Lamotrigine 50mg tablets (Actavis UK Ltd)  
3 39714 Lamotrigine 25mg tablets (Teva UK Ltd)  
4 39715 Lamotrigine 100mg tablets (Teva UK Ltd)  
5 45572 Lamotrigine 50mg Suppository  
6 46775 Lamotrigine 50mg tablets (Teva UK Ltd)  
7 47817 Lamotrigine 50mg tablets (IVAX Pharmaceuticals UK Ltd)  
8 47963 Lamotrigine 25mg tablets (Fannin UK Ltd)  
9 48164 Lamotrigine 25mg dispersible tablets sugar free (A A H Pharmaceuticals Ltd)  
10 48182 Lamotrigine 25mg tablets (Arrow Generics Ltd)  
11 49532 Lamotrigine 25mg tablets (Accord Healthcare Ltd)  
12 50235 Lamotrigine 25mg tablets (A A H Pharmaceuticals Ltd)  
13 51309 Lamictal 25mg tablets (DE Pharmaceuticals)  
14 51501 Lamictal 25mg tablets (Lexon (UK) Ltd)  
15 54276 Lamotrigine 5mg dispersible tablets sugar free (Actavis UK Ltd)  
16 55644 Lamotrigine 25mg tablets (Bristol Laboratories Ltd)  
17 56504 Lamotrigine 25mg dispersible tablets sugar free (Tillomed Laboratories Ltd)  
18 57863 Lamotrigine 50mg tablets (Alliance Healthcare (Distribution) Ltd)  
19 59120 Lamotrigine 100mg tablets (A A H Pharmaceuticals Ltd)  
20 59125 Lamotrigine 100mg tablets (Alliance Healthcare (Distribution) Ltd)  
21 59241 Lamotrigine 100mg dispersible tablets sugar free (Teva UK Ltd)  
22 59242 Lamotrigine 25mg dispersible tablets sugar free (Teva UK Ltd)  
23 59273 Lamotrigine 50mg tablets (A A H Pharmaceuticals Ltd)  
24 59318 Lamotrigine 25mg tablets (Alliance Healthcare (Distribution) Ltd)  
25 59609 Lamotrigine 100mg dispersible tablets sugar free (A A H Pharmaceuticals Ltd)  
26 60268 Lamotrigine 200mg tablets (A A H Pharmaceuticals Ltd)  
27 60424 Lamictal 25mg dispersible tablets (Lexon (UK) Ltd)  
28 60578 Lamotrigine 200mg tablets (Waymade Healthcare Plc)  
29 60804 Lamotrigine 50mg/5ml oral suspension  
30 61623 Lamotrigine 50mg tablets (Accord Healthcare Ltd)  
31 61624 Lamotrigine 100mg tablets (Accord Healthcare Ltd)  
32 61625 Lamotrigine 200mg tablets (Accord Healthcare Ltd)  
33 62869 Lamotrigine 50mg tablets (Sigma Pharmaceuticals Plc)  
34 63973 Lamotrigine 25mg dispersible tablets sugar free (Actavis UK Ltd)  
35 64600 Lamotrigine 100mg tablets (Kent Pharmaceuticals Ltd)  
36 65965 Lamictal 50mg tablets (DE Pharmaceuticals)  
37 65969 Lamotrigine 5mg/5ml oral solution  
38 66417 Lamotrigine 200mg tablets (Teva UK Ltd)  
39 6021 Keppra 250mg tablets (UCB Pharma Ltd)  
40 6022 Levetiracetam 250mg tablets  
41 6047 Levetiracetam 1g tablets  
42 6068 Levetiracetam 500mg tablets  
43 6858 Levetiracetam 100mg/ml oral solution sugar free  
44 10247 Keppra 500mg tablets (UCB Pharma Ltd)  
45 11715 Levetiracetam 750mg tablets  
46 15227 Keppra 1g tablets (UCB Pharma Ltd)  
47 16080 Keppra 750mg tablets (UCB Pharma Ltd)  
48 20640 Keppra 100mg/ml oral solution (UCB Pharma Ltd)  
49 22763 Levetiracetam 500mg/5ml solution for infusion vials  
50 36327 Keppra 500mg/5ml concentrate for solution for infusion vials (UCB Pharma Ltd)  
51 50110 Keppra 250mg tablets (Mawdsley-Brooks & Company Ltd)

1  
2 51108 Levetiracetam 500mg tablets (Accord Healthcare Ltd)  
3 51756 Keppra 100mg/ml oral solution (Lexon (UK) Ltd)  
4 52007 Keppra 500mg tablets (Sigma Pharmaceuticals Plc)  
5 52623 Keppra 250mg tablets (Sigma Pharmaceuticals Plc)  
6 53016 Keppra 100mg/ml oral solution (Sigma Pharmaceuticals Plc)  
7 53307 Levetiracetam 100mg/ml oral solution sugar free (A A H Pharmaceuticals Ltd)  
8 53343 Keppra 1g tablets (Lexon (UK) Ltd)  
9 53476 Keppra 250mg tablets (Waymade Healthcare Plc)  
10 54500 Levetiracetam 250mg granules sachets sugar free  
11 54631 Levetiracetam 500mg tablets (Teva UK Ltd)  
12 54632 Levetiracetam 250mg tablets (Teva UK Ltd)  
13 54739 Levetiracetam 500mg tablets (Alliance Healthcare (Distribution) Ltd)  
14 56755 Levetiracetam 250mg/5ml oral suspension  
15 58706 Levetiracetam 250mg tablets (Zentiva)  
16 59128 Levetiracetam 250mg tablets (Accord Healthcare Ltd)  
17 59964 Desitrend 250mg granules sachets (Desitin Pharma Ltd)  
18 61166 Levetiracetam 100mg/ml oral solution sugar free (Beacon Pharmaceuticals Ltd)  
19 61462 Levetiracetam 250mg tablets (DE Pharmaceuticals)  
20 61468 Keppra 250mg tablets (Necessity Supplies Ltd)  
21 61529 Desitrend 100mg/ml oral solution (Desitin Pharma Ltd)  
22 61793 Matever 750mg tablets (Aspire Pharma Ltd)  
23 62588 Matever 250mg tablets (Aspire Pharma Ltd)  
24 63042 Matever 500mg tablets (Aspire Pharma Ltd)  
25 63372 Levetiracetam 1g tablets (Zentiva)  
26 63842 Levetiracetam 250mg tablets (Actavis UK Ltd)  
27 64026 Levetiracetam 250mg tablets (A A H Pharmaceuticals Ltd)  
28 64817 Levetiracetam 1g tablets (Rivopharm (UK) Ltd)  
29 65827 Levetiracetam 100mg/ml oral solution sugar free (Actavis UK Ltd)  
30 664 Lorazepam 4mg/1ml solution for injection ampoules  
31 7444 Ativan 4mg/1ml solution for injection ampoules (Pfizer Ltd)  
32 41186 Mesuximide 300mg Capsule  
33 45615 Midazolam 5mg/1ml oromucosal solution pre-filled oral syringes  
34 45974 Buccolam 5mg/1ml oromucosal solution pre-filled oral syringes (Shire Pharmace  
35 46667 Midazolam 10mg/2ml oromucosal solution pre-filled oral syringes  
36 46757 Midazolam 7.5mg/1.5ml oromucosal solution pre-filled oral syringes  
37 46797 Buccolam 7.5mg/1.5ml oromucosal solution pre-filled oral syringes (Shire Pharn  
38 46826 Buccolam 10mg/2ml oromucosal solution pre-filled oral syringes (Shire Pharma  
39 46883 Midazolam 2.5mg/0.5ml oromucosal solution pre-filled oral syringes  
40 47045 Buccolam 2.5mg/0.5ml oromucosal solution pre-filled oral syringes (Shire Pharn  
41 49534 Midazolam 5mg/0.5ml oromucosal solution pre-filled syringes  
42 51550 Epistatus 10mg/1ml oromucosal solution (Special Products Ltd)  
43 51925 Epistatus 7.5mg/0.75ml oromucosal solution pre-filled oral syringes (Special Prc  
44 53306 Epistatus 10mg/1ml oromucosal solution pre-filled oral syringes (Special Produc  
45 53748 Midazolam 7.5mg/0.75ml oromucosal solution pre-filled syringes  
46 54919 Epistatus 5mg/0.5ml oromucosal solution pre-filled oral syringes (Special Produ  
47 7301 Midazolam 10mg/ml buccal solution  
48 10278 Epistatus 10mg/ml Oromucosal solution (Special Products Ltd)  
49 43450 Midazolam Oral solution  
50 44764 Midazolam maleate buccal solution  
51 55642 Epistatus 2.5mg/0.25ml oromucosal solution pre-filled oral syringes (Special Prc  
52  
53  
54  
55  
56  
57  
58  
59  
60

1  
2 50489 Paraldehyde 50% in Olive oil rectal solution (Drug Tariff Special Order)  
3 5449 Oxcarbazepine 300mg tablets  
4 6436 Oxcarbazepine 600mg tablets  
5 6552 Oxcarbazepine 150mg tablets  
6 7020 Trileptal 300mg tablets (Novartis Pharmaceuticals UK Ltd)  
7 7021 Trileptal 150mg tablets (Novartis Pharmaceuticals UK Ltd)  
8 14199 Oxcarbazepine 60mg/ml oral suspension sugar free  
9 18567 Trileptal 600mg tablets (Novartis Pharmaceuticals UK Ltd)  
10 26902 Trileptal 60mg/ml oral suspension (Novartis Pharmaceuticals UK Ltd)  
11 15066 Paraldehyde intravenous injection  
12 16699 Paraldehyde intramuscular injection  
13 16799 Paraldehyde rectal solution  
14 50285 Perampanel 2mg tablets  
15 53082 Perampanel 4mg tablets  
16 54146 Fycompa 2mg tablets (Eisai Ltd)  
17 54194 Perampanel 6mg tablets  
18 54195 Perampanel 8mg tablets  
19 54594 Perampanel 10mg tablets  
20 54595 Perampanel 12mg tablets  
21 54872 Fycompa 4mg tablets (Eisai Ltd)  
22 54905 Fycompa 8mg tablets (Eisai Ltd)  
23 57349 Fycompa 6mg tablets (Eisai Ltd)  
24 59622 Fycompa 10mg tablets (Eisai Ltd)  
25 60083 Fycompa 12mg tablets (Eisai Ltd)  
26 3225 Phenobarbital sodium 30mg tablet  
27 4496 Phenobarbital 100mg tablet  
28 10273 Phenobarbital 50mg/5ml oral solution  
29 14762 Phenobarbital 60mg/1ml solution for injection ampoules  
30 14763 Phenobarbital 200mg/1ml solution for injection ampoules  
31 15022 Methylphenobarbital 200mg Tablet  
32 18457 Phenobarbital 30mg/1ml solution for injection ampoules  
33 19024 Prominal 200mg Tablet (Sanofi-Synthelabo Ltd)  
34 19907 Phenobarbital sodium 60mg tablet  
35 21488 Luminal 30mg Tablet (Sanofi-Synthelabo Ltd)  
36 23237 Phenobarbital 15mg/1ml solution for injection ampoules  
37 23349 Prominal 60mg Tablet (Sanofi-Synthelabo Ltd)  
38 23767 Methylphenobarbital 60mg Tablet  
39 23768 Methylphenobarbital 30mg Tablet  
40 24821 Gardenal Sodium 200mg/1ml solution for injection ampoules (Concord Pharma)  
41 25146 Prominal 30mg Tablet (Sanofi-Synthelabo Ltd)  
42 25285 Luminal 60mg Tablet (Sanofi-Synthelabo Ltd)  
43 32783 Luminal 15mg Tablet (Sanofi-Synthelabo Ltd)  
44 34275 Phenobarbital 15mg/5ml Oral solution (William Ransom)  
45 41973 Phenobarbital 15mg Tablet (Celltech Pharma Europe Ltd)  
46 47812 Phenobarbital 60mg Tablet (Celltech Pharma Europe Ltd)  
47 55796 Phenobarbital sodium 15mg/5ml oral solution  
48 5439 Phenobarbital 15mg tablets  
49 29306 Phenobarbital 15mg tablets (Teva UK Ltd)  
50 35164 Phenobarbital 50mg/5ml oral suspension  
51 39618 Phenobarbital 20mg/5ml oral solution  
52  
53  
54  
55  
56  
57  
58  
59  
60

|    |                                                                                |
|----|--------------------------------------------------------------------------------|
| 1  |                                                                                |
| 2  | 45370 Phenobarbital 75mg/5ml oral solution                                     |
| 3  | 51326 Phenobarbital 50mg/5ml oral solution                                     |
| 4  | 55502 Phenobarbital 75mg/5ml oral suspension                                   |
| 5  | 57247 Phenobarbital 100mg/5ml oral suspension                                  |
| 6  | 57722 Phenobarbital 25mg/5ml oral solution                                     |
| 7  |                                                                                |
| 8  | 58905 Phenobarbital 15mg/5ml elixir (Alliance Healthcare (Distribution) Ltd)   |
| 9  | 59013 Phenobarbital 60mg/5ml oral solution                                     |
| 10 | 59232 Phenobarbital 15mg/5ml elixir (A A H Pharmaceuticals Ltd)                |
| 11 | 59574 Phenobarbital 15mg tablets (Kent Pharmaceuticals Ltd)                    |
| 12 |                                                                                |
| 13 | 59795 Phenobarbital 15mg tablets (Bristol Laboratories Ltd)                    |
| 14 | 59868 Phenobarbital 15mg tablets (A A H Pharmaceuticals Ltd)                   |
| 15 | 59917 Phenobarbital 50mg/5ml oral solution (Drug Tariff Special Order)         |
| 16 | 60212 Phenobarbital 15mg/5ml oral solution                                     |
| 17 | 61217 Phenobarbital 50mg/5ml oral suspension (Drug Tariff Special Order)       |
| 18 |                                                                                |
| 19 | 2062 Phenytoin sodium 100mg tablets                                            |
| 20 | 4175 Epanutin 30mg/5ml oral suspension (Pfizer Ltd)                            |
| 21 | 4490 Phenytoin 30mg/5ml oral suspension                                        |
| 22 | 5587 Phenytoin sodium 50mg capsules                                            |
| 23 | 6504 Phenytoin sodium 100mg capsules                                           |
| 24 | 6594 Phenytoin sodium 300mg capsules                                           |
| 25 | 6624 Phenytoin sodium 25mg capsules                                            |
| 26 |                                                                                |
| 27 | 14857 Phenytoin 50mg chewable tablets                                          |
| 28 | 17177 Epanutin Infatabs 50mg chewable tablets (Pfizer Ltd)                     |
| 29 | 27113 Phenytoin sodium 100mg tablets (Teva UK Ltd)                             |
| 30 | 34144 Phenytoin sodium 100mg tablets (Actavis UK Ltd)                          |
| 31 | 34592 Phenytoin sodium 100mg tablets (A A H Pharmaceuticals Ltd)               |
| 32 | 47014 Phenytoin 90mg/5ml oral suspension                                       |
| 33 | 49789 Phenytoin sodium 50mg capsules (Flynn Pharma Ltd)                        |
| 34 | 50147 Phenytoin sodium 100mg capsules (Flynn Pharma Ltd)                       |
| 35 | 50148 Phenytoin sodium 25mg capsules (Flynn Pharma Ltd)                        |
| 36 | 50159 Phenytoin sodium 300mg capsules (Flynn Pharma Ltd)                       |
| 37 |                                                                                |
| 38 | 53749 Phenytoin sodium 100mg capsules (A A H Pharmaceuticals Ltd)              |
| 39 | 53750 Phenytoin sodium 50mg capsules (A A H Pharmaceuticals Ltd)               |
| 40 | 53846 Phenytoin sodium 300mg capsules (A A H Pharmaceuticals Ltd)              |
| 41 | 56786 Phenytoin sodium 100mg tablets (Milpharm Ltd)                            |
| 42 |                                                                                |
| 43 | 58539 Phenytoin 90mg/5ml oral solution                                         |
| 44 | 59082 Phenytoin sodium 100mg capsules (Alliance Healthcare (Distribution) Ltd) |
| 45 | 59293 Phenytoin sodium 300mg capsules (Alliance Healthcare (Distribution) Ltd) |
| 46 | 59377 Phenytoin sodium 100mg capsules (Actavis UK Ltd)                         |
| 47 | 59378 Phenytoin sodium 100mg tablets (Wockhardt UK Ltd)                        |
| 48 |                                                                                |
| 49 | 59467 Phenytoin sodium 25mg capsules (Alliance Healthcare (Distribution) Ltd)  |
| 50 | 59504 Phenytoin sodium 100mg tablets (Alliance Healthcare (Distribution) Ltd)  |
| 51 | 60245 Phenytoin 90mg/5ml oral suspension (Drug Tariff Special Order)           |
| 52 | 60573 Phenytoin sodium 50mg capsules (Alliance Healthcare (Distribution) Ltd)  |
| 53 | 61769 Phenytoin sodium 25mg capsules (A A H Pharmaceuticals Ltd)               |
| 54 | 62181 Phenytoin sodium 100mg tablets (Kent Pharmaceuticals Ltd)                |
| 55 | 66347 Phenytoin sodium 100mg capsules (Sigma Pharmaceuticals Plc)              |
| 56 | 66608 Phenytoin sodium 100mg tablets (Waymade Healthcare Plc)                  |
| 57 |                                                                                |
| 58 | 1398 Epanutin 100mg capsules (Pfizer Ltd)                                      |
| 59 | 2782 Phenytoin sodium 50mg tablets                                             |
| 60 |                                                                                |

1 3881 Epanutin 50mg capsules (Pfizer Ltd)  
2 7498 Epanutin 25mg capsules (Pfizer Ltd)  
3 10263 Epanutin 300mg capsules (Pfizer Ltd)  
4 12469 Epanutin Ready-Mixed Parenteral 250mg/5ml solution for injection ampoules (f  
5 24637 Phenytoin sodium 250mg/5ml solution for injection ampoules  
6 107 Phenytoin 25mg capsule  
7 1370 Phenytoin 100mg capsule  
8 2128 Phenytoin 50mg capsule  
9 3068 Phenytoin 300mg capsule  
10 9678 Phenytoin 90mg/5ml oral solution sugar free  
11 21854 Pentran 100mg Tablet (Berk Pharmaceuticals Ltd)  
12 30392 Pentran 50mg Tablet (Berk Pharmaceuticals Ltd)  
13 34699 Phenytoin 90mg/5ml Oral suspension sugar free (Rosemont Pharmaceuticals Lt  
14 47670 Phenytoin 100mg Capsule (Actavis UK Ltd)  
15 62650 Phenytoin 100mg Tablet (Berk Pharmaceuticals Ltd)  
16 22399 Potassium bromide mixture  
17 209 Primidone 250mg/5ml oral suspension  
18 1157 Primidone 250mg tablets  
19 4456 Mysoline 250mg Tablet (AstraZeneca UK Ltd)  
20 10092 Mysoline 250mg tablets (SERB)  
21 15030 Mysoline 250mg/5ml Oral suspension (AstraZeneca UK Ltd)  
22 24627 Primidone 25mg/5ml oral suspension  
23 33252 Primidone 62.5mg/5ml oral suspension  
24 35835 Primidone 50mg/5ml oral suspension  
25 37883 Primidone 100mg/5ml oral solution  
26 44599 Primidone 50mg tablets  
27 45476 Mysoline 50mg tablets (SERB)  
28 50696 Primidone 250mg/5ml oral suspension (Special Order)  
29 53172 Primidone 50mg capsules  
30 59047 Mysoline 250mg tablets (DE Pharmaceuticals)  
31 59088 Primidone 250mg tablets (SERB)  
32 59389 Primidone 250mg tablets (A A H Pharmaceuticals Ltd)  
33 59413 Primidone 50mg tablets (SERB)  
34 59451 Primidone 250mg tablets (Alliance Healthcare (Distribution) Ltd)  
35 59838 Primidone 50mg tablets (Alliance Healthcare (Distribution) Ltd)  
36 60978 Primidone 50mg tablets (A A H Pharmaceuticals Ltd)  
37 64110 Primidone 25mg/5ml oral suspension (Special Order)  
38 64127 Primidone 50mg/5ml oral suspension (Drug Tariff Special Order)  
39 64635 Primidone 62.5mg/5ml oral suspension (Drug Tariff Special Order)  
40 1557 Pyridoxine 50mg tablets  
41 27109 Pyridoxine 50mg tablets (A A H Pharmaceuticals Ltd)  
42 46943 Pyridoxine 50mg tablets (Wockhardt UK Ltd)  
43 50305 Pyridoxine 100mg capsules  
44 61404 HealthAid Vitamin B6 50mg tablets (HealthAid Ltd)  
45 44363 Pyridoxine 100mg/5ml oral solution  
46 57713 Pyridoxine 250mg/5ml oral suspension  
47 58238 Pyridoxine 10mg/5ml oral suspension  
48 61940 Pyridoxine 50mg/5ml oral suspension  
49 63740 Pyridoxine 100mg/5ml oral suspension  
50 46319 Trobalt 50mg tablets (GlaxoSmithKline UK Ltd)



1  
2 46320 Trobalt 100mg tablets (GlaxoSmithKline UK Ltd)  
3 46380 Retigabine 100mg tablets  
4 46381 Retigabine 50mg tablets  
5 46622 Retigabine 200mg tablets  
6 46787 Retigabine 50mg tablets and Retigabine 100mg tablets  
7 46788 Retigabine 300mg tablets  
8 47032 Trobalt 200mg tablets (GlaxoSmithKline UK Ltd)  
9 47715 Trobalt 300mg tablets (GlaxoSmithKline UK Ltd)  
10 47770 Retigabine 400mg tablets  
11 54190 Trobalt 400mg tablets (GlaxoSmithKline UK Ltd)  
12 37416 Rufinamide 200mg tablets  
13 37512 Inovelon 200mg tablets (Eisai Ltd)  
14 37515 Rufinamide 100mg tablets  
15 37895 Rufinamide 400mg tablets  
16 40521 Inovelon 400mg tablets (Eisai Ltd)  
17 43919 Inovelon 100mg tablets (Eisai Ltd)  
18 51416 Rufinamide 40mg/ml oral suspension sugar free  
19 584 Sodium valproate 200mg gastro-resistant tablets  
20 1550 Sodium valproate 200mg/5ml oral solution  
21 2082 Epilim 200mg/5ml liquid (Sanofi)  
22 2822 Epilim ec 500mg Gastro-resistant tablet (Sanofi)  
23 3107 Epilim Chrono 500 tablets (Sanofi)  
24 3350 Sodium valproate 500mg gastro-resistant tablets  
25 3731 Epilim ec 200mg Gastro-resistant tablet (Sanofi)  
26 3733 Epilim Chrono 300 tablets (Sanofi)  
27 3734 Epilim Chrono 200 tablets (Sanofi)  
28 3845 Sodium valproate 200mg/5ml oral solution sugar free  
29 4195 Epilim 100mg crushable tablets (Sanofi)  
30 4495 Epilim 200mg/5ml syrup (Sanofi)  
31 4502 Sodium valproate 100mg tablets  
32 6560 Sodium valproate 500mg modified-release tablets  
33 6711 Sodium valproate 300mg modified-release tablets  
34 7011 Sodium valproate with valproic acid 300mg modified release tablets  
35 8885 Orlept 500mg gastro-resistant tablets (Wockhardt UK Ltd)  
36 9281 Sodium valproate with valproic acid 200mg modified release tablets  
37 11075 Sodium valproate with valproic acid 500mg modified release tablets  
38 16609 Sodium valproate 400mg powder and solvent for solution for injection vials  
39 17152 Orlept 200mg gastro-resistant tablets (Wockhardt UK Ltd)  
40 20004 Epilim Intravenous 400mg powder and solvent for solution for injection vials (Se  
41 24153 Orlept SF 200mg/5ml liquid (Wockhardt UK Ltd)  
42 30081 Sodium valproate CR 500mg Tablet (Hillcross Pharmaceuticals Ltd)  
43 33058 Epival CR 500mg tablets (Chanelle Medical UK Ltd)  
44 33106 Sodium valproate 200mg/5ml Oral solution (IVAX Pharmaceuticals UK Ltd)  
45 34120 Sodium valproate 200mg gastro-resistant tablets (A A H Pharmaceuticals Ltd)  
46 34150 Valproate sodium 200mg Gastro-resistant tablet (IVAX Pharmaceuticals UK Ltd)  
47 34151 Valproate sodium 500mg Gastro-resistant tablet (IVAX Pharmaceuticals UK Ltd)  
48 34178 Sodium valproate 500mg gastro-resistant tablets (A A H Pharmaceuticals Ltd)  
49 34414 Sodium valproate 200mg Tablet (Sterwin Medicines)  
50 34626 Sodium valproate 200mg gastro-resistant tablets (Mylan Ltd)  
51 34632 Sodium valproate 200mg gastro-resistant tablets (Teva UK Ltd)

1 34707 Sodium valproate 200mg gastro-resistant tablets (IVAX Pharmaceuticals UK Ltd)  
2 34883 Sodium valproate 200mg/5ml oral solution sugar free (A A H Pharmaceuticals Li  
3 35024 Sodium valproate 300mg modified-release capsules  
4 35471 Sodium valproate 150mg modified-release capsules  
5 35747 Episenta 300mg modified-release capsules (Desitin Pharma Ltd)  
6 35755 Sodium valproate 500mg modified-release granules sachets sugar free  
7 36318 Sodium valproate 1g modified-release granules sachets sugar free  
8 36633 Episenta 150mg modified-release capsules (Desitin Pharma Ltd)  
9 37306 Sodium valproate 200mg/5ml Oral solution (Sterwin Medicines)  
10 37611 Epival CR 300mg tablets (Chanelle Medical UK Ltd)  
11 38507 Epilim Chronosphere MR 100mg granules sachets (Sanofi)  
12 38508 Epilim Chronosphere MR 250mg granules sachets (Sanofi)  
13 38939 Epilim 200 gastro-resistant tablets (Sanofi)  
14 38949 Epilim 500 gastro-resistant tablets (Sanofi)  
15 39039 Sodium valproate 200mg modified-release tablets  
16 39276 Sodium valproate with valproic acid 250mg modified release granules  
17 39279 Epilim Chronosphere MR 500mg granules sachets (Sanofi)  
18 39427 Sodium valproate with valproic acid 750mg modified release granules  
19 39452 Sodium valproate with valproic acid 500mg modified release granules  
20 39550 Epilim Chronosphere MR 750mg granules sachets (Sanofi)  
21 39930 Epilim Chronosphere MR 50mg granules sachets (Sanofi)  
22 40070 Sodium valproate 300mg/3ml solution for injection ampoules  
23 40395 Sodium valproate 100mg tablets (Mylan Ltd)  
24 40400 Sodium valproate 500mg Gastro-resistant tablet (C P Pharmaceuticals Ltd)  
25 41137 Sodium valproate with valproic acid 100mg modified release granules  
26 42038 Epilim Chronosphere MR 1000mg granules sachets (Sanofi)  
27 42090 Sodium valproate 200mg/5ml oral solution sugar free (Zentiva)  
28 43178 Sodium valproate with valproic acid 1000mg modified release granules  
29 43387 Sodium valproate with valproic acid 50mg modified release granules  
30 43648 Sodium valproate oral solution  
31 43742 Sodium valproate 1g/10ml solution for injection ampoules  
32 44472 Sodium valproate 100mg modified-release granules sachets sugar free  
33 44718 Sodium valproate 750mg modified-release granules sachets sugar free  
34 44903 Sodium valproate 500mg gastro-resistant tablets (Zentiva)  
35 45106 Sodium valproate 250mg modified-release granules sachets sugar free  
36 45344 Sodium valproate 200mg/5ml Oral solution (Hillcross Pharmaceuticals Ltd)  
37 45419 Sodium valproate 50mg modified-release granules sachets sugar free  
38 46774 Sodium valproate 500mg gastro-resistant tablets (Teva UK Ltd)  
39 49923 Epilim Chrono 200 tablets (Lexon (UK) Ltd)  
40 51751 Sodium valproate 200mg gastro-resistant tablets (Wockhardt UK Ltd)  
41 53195 Epilim Chrono 200 tablets (DE Pharmaceuticals)  
42 53197 Sodium valproate 300mg modified-release tablets (Sigma Pharmaceuticals Plc)  
43 53501 Epilim Chrono 500 tablets (Lexon (UK) Ltd)  
44 53524 Epilim Chrono 300 tablets (DE Pharmaceuticals)  
45 55006 Sodium valproate 500mg modified-release tablets (Alliance Healthcare (Distribu  
46 56076 Sodium valproate 500mg/5ml oral suspension  
47 56136 Epilim Chrono 300 tablets (Waymade Healthcare Plc)  
48 60102 Sodium valproate 500mg modified-release tablets (J M McGill Ltd)  
49 60332 Sodium valproate 200mg/5ml oral solution sugar free (Wockhardt UK Ltd)  
50 62637 Sodium valproate 200mg gastro-resistant tablets (Actavis UK Ltd)



1  
2 63685 Epilim Chrono 500 tablets (DE Pharmaceuticals)  
3 36634 Episenta 1000mg modified-release granules sachets (Desitin Pharma Ltd)  
4 37584 Episenta 500mg modified-release granules sachets (Desitin Pharma Ltd)  
5 37970 Stiripentol 250mg oral powder sachets  
6 42491 Stiripentol 250mg capsules  
7 43836 Stiripentol 500mg capsules  
8 44400 Stiripentol 500mg oral powder sachets  
9 32200 Sultiame 200mg tablets  
10 37633 Sultiame 50mg tablets  
11 35987 Ospolot fc 50mg Tablet (IDIS World Medicines)  
12 10311 Thiopental 500mg powder for solution for injection vials  
13 13825 Tiagabine 5mg tablets  
14 13828 Tiagabine 15mg tablets  
15 16442 Tiagabine 10mg tablets  
16 18737 Gabitril 5mg Tablet (Sanofi-Synthelabo Ltd)  
17 20859 Gabitril 10mg Tablet (Sanofi-Synthelabo Ltd)  
18 24264 Gabitril 15mg tablets (Teva UK Ltd)  
19 25244 Gabitril 10mg tablets (Teva UK Ltd)  
20 26318 Gabitril 15mg Tablet (Sanofi-Synthelabo Ltd)  
21 32973 Gabitril 5mg tablets (Teva UK Ltd)  
22 795 Topiramate 15mg capsules  
23 5830 Topiramate 50mg capsules  
24 5874 Topiramate 25mg capsules  
25 6820 Topiramate 100mg tablets  
26 7073 Topiramate 50mg tablets  
27 7108 Topiramate 200mg tablets  
28 9823 Topamax 25mg tablets (Janssen-Cilag Ltd)  
29 11237 Topiramate 25mg tablets  
30 12821 Topamax 15mg sprinkle capsules (Janssen-Cilag Ltd)  
31 13608 Topamax 50mg tablets (Janssen-Cilag Ltd)  
32 13890 Topamax 200mg tablets (Janssen-Cilag Ltd)  
33 15851 Topamax 100mg tablets (Janssen-Cilag Ltd)  
34 16262 Topamax 25mg sprinkle capsules (Janssen-Cilag Ltd)  
35 18077 Topamax 50mg sprinkle capsules (Janssen-Cilag Ltd)  
36 44719 Topiramate 25mg/5ml oral suspension  
37 46572 Topiramate 50mg/5ml oral suspension  
38 51839 Topamax 25mg sprinkle capsules (Mawdsley-Brooks & Company Ltd)  
39 52751 Topiramate 5mg/5ml oral solution  
40 53779 Topiramate 25mg capsules (Sandoz Ltd)  
41 53780 Topiramate 25mg tablets (Sandoz Ltd)  
42 54245 Topiramate 25mg capsules (A A H Pharmaceuticals Ltd)  
43 55649 Topiramate 15mg capsules (A A H Pharmaceuticals Ltd)  
44 57670 Topiramate 50mg capsules (Sandoz Ltd)  
45 58019 Topiramate 25mg tablets (Teva UK Ltd)  
46 58137 Topiramate 100mg/5ml oral solution  
47 59051 Topiramate 50mg tablets (Accord Healthcare Ltd)  
48 59058 Topiramate 20mg/5ml oral suspension  
49 60156 Topiramate 25mg capsules (Actavis UK Ltd)  
50 60878 Topiramate 15mg/5ml oral solution  
51 61198 Topiramate 15mg/5ml oral suspension  
52  
53  
54  
55  
56  
57  
58  
59  
60

1  
2 61630 Topiramate 100mg tablets (Teva UK Ltd)  
3 61770 Topiramate 50mg capsules (Teva UK Ltd)  
4 62198 Topiramate 50mg capsules (A A H Pharmaceuticals Ltd)  
5 62306 Topiramate 25mg capsules (Teva UK Ltd)  
6 63113 Topiramate 25mg capsules (Phoenix Healthcare Distribution Ltd)  
7 63250 Topiramate 25mg tablets (Accord Healthcare Ltd)  
8 63504 Topiramate 25mg tablets (Actavis UK Ltd)  
9 63545 Topiramate 200mg tablets (Actavis UK Ltd)  
10 64773 Topiramate 30mg/5ml oral solution  
11 53211 Valproic acid 500mg/5ml oral solution  
12 5617 Convulex 300mg gastro-resistant capsules (Pfizer Ltd)  
13 5997 Convulex 150mg gastro-resistant capsules (Pfizer Ltd)  
14 15650 Valproic acid 300mg gastro-resistant capsules  
15 16021 Valproic acid 500mg gastro-resistant capsules  
16 18614 Valproic acid 150mg gastro-resistant capsules  
17 18886 Convulex 500mg gastro-resistant capsules (Pfizer Ltd)  
18 2821 Vigabatrin 500mg tablets  
19 4585 Vigabatrin 500mg oral powder sachets sugar free  
20 10705 Sabril 500mg tablets (Sanofi)  
21 16782 Vigabatrin 125mg capsules  
22 17990 Sabril 500mg oral powder sachets (Sanofi)  
23 59144 Vigabatrin 500mg/5ml oral solution  
24 11873 Zonisamide 25mg capsules  
25 15338 Zonisamide 100mg capsules  
26 19500 Zonisamide 50mg capsules  
27 24176 Zonegran 50mg capsules (Eisai Ltd)  
28 24177 Zonegran 100mg capsules (Eisai Ltd)  
29 27760 Zonegran 25mg capsules (Eisai Ltd)  
30 47143 Zonisamide 50mg/5ml oral suspension  
31 54873 Zonisamide 50mg/5ml oral solution  
32 54759 Clobazam 5mg/5ml oral suspension sugar free  
33 9979 Gabapentin 600mg tablets and Gabapentin 300mg capsules  
34 50442 Phenobarbital sodium 50mg/5ml oral solution  
35 52680 Clobazam 7.5mg/5ml oral solution  
36 54571 Levetiracetam 1g granules sachets sugar free  
37 54828 Sodium valproate 600mg/5ml oral solution  
38 54984 Phenytoin 300mg/5ml oral solution  
39 55253 Levetiracetam 500mg granules sachets sugar free  
40 56326 Desitrend 500mg granules sachets (Desitin Pharma Ltd)  
41 57643 Zonisamide 50mg/5ml oral suspension  
42 58179 Levetiracetam 250mg/5ml oral solution  
43 58527 Desitrend 1000mg granules sachets (Desitin Pharma Ltd)  
44 60598 Phenobarbital sodium 15mg/5ml oral suspension  
45 61015 Clonazepam 500microgram oral lyophilisates sugar free  
46 61760 Vimpat 200mg/20ml solution for infusion vials (UCB Pharma Ltd)  
47 63271 Phenytoin 300mg/5ml oral solution (Special Order)  
48 64693 Clonazepam 2.5mg/ml drops  
49 65046 Lamotrigine 15mg/5ml oral suspension  
50 51583 Primidone 100mg/5ml oral suspension  
51 57898 Carbamazepine 100mg/5ml oral suspension  
52  
53  
54  
55  
56  
57  
58  
59  
60

1  
2 55019 Phenobarbital 250mg/5ml oral suspension  
3 58532 Phenobarbital 34mg/5ml oral suspension  
4 60648 Phenobarbital 15mg/5ml oral suspension  
5 49429 Paraldehyde 50% in Sunflower oil rectal solution  
6 59375 Paraldehyde 50% in Olive oil rectal solution  
7 61290 Midazolam 2.5mg/0.25ml oromucosal solution pre-filled oral syringes  
8 63631 Paraldehyde 50% in Arachis oil rectal solution  
9 54609 Gabapentin 50mg/ml oral solution sugar free  
10 58162 Gabapentin 600mg/5ml oral solution  
11 59196 Gabapentin 400mg/5ml oral solution  
12 63375 Gabapentin 200mg/5ml oral solution  
13 66495 Brivaracetam 50mg tablets  
14 57874 Topiramate 12.5mg/5ml oral suspension  
15 60432 Topiramate 10mg/5ml oral solution  
16  
17  
18  
19  
20  
21  
22  
23  
24  
25  
26  
27  
28  
29  
30  
31  
32  
33  
34  
35  
36  
37  
38  
39  
40  
41  
42  
43  
44  
45  
46  
47  
48  
49  
50  
51  
52  
53  
54  
55  
56  
57  
58  
59  
60

**drugsubstance**

1  
2  
3 Pregabalin  
4 Pregabalin  
5 Pregabalin  
6 Pregabalin  
7 Pregabalin  
8 Pregabalin  
9 Pregabalin  
10 Pregabalin  
11 Pregabalin  
12 Pregabalin  
13 Pregabalin  
14 Pregabalin  
15 Pregabalin  
16 Pregabalin  
17 Pregabalin  
18 Pregabalin  
19 Pregabalin  
20 Pregabalin  
21 Pregabalin  
22 Pregabalin  
23 Pregabalin  
24 Pregabalin  
25 Pregabalin  
26 Pregabalin  
27 Pregabalin  
28 Pregabalin  
29 Pregabalin  
30 Pregabalin  
31 Pregabalin  
32 Pregabalin  
33 Pregabalin  
34 Pregabalin  
35 Pregabalin  
36 Pregabalin  
37 Pregabalin  
38 Pregabalin  
39 Pregabalin  
40 Pregabalin  
41 Pregabalin  
42 Pregabalin  
43 Pregabalin  
44 Pregabalin  
45 Pregabalin  
46 Pregabalin  
47 Pregabalin  
48 Pregabalin  
49 Pregabalin  
50 Pregabalin  
51 Pregabalin  
52 Pregabalin  
53 Pregabalin  
54 Pregabalin  
55 Pregabalin  
56 Pregabalin  
57 Pregabalin  
58 Pregabalin  
59 Pregabalin  
60 Pregabalin

For peer review only

- 1
- 2 Pregabalin
- 3 Beclamide
- 4 Beclamide
- 5 Carbamazepine
- 6 Carbamazepine
- 7 Carbamazepine
- 8 Carbamazepine
- 9 Carbamazepine
- 10 Carbamazepine
- 11 Carbamazepine
- 12 Carbamazepine
- 13 Carbamazepine
- 14 Carbamazepine
- 15 Carbamazepine
- 16 Carbamazepine
- 17 Carbamazepine
- 18 Carbamazepine
- 19 Carbamazepine
- 20 Carbamazepine
- 21 Carbamazepine
- 22 Carbamazepine
- 23 Carbamazepine
- 24 Carbamazepine
- 25 Carbamazepine
- 26 Carbamazepine
- 27 Carbamazepine
- 28 Carbamazepine
- 29 Carbamazepine
- 30 Carbamazepine
- 31 Carbamazepine
- 32 Carbamazepine
- 33 Carbamazepine
- 34 Carbamazepine
- 35 Carbamazepine
- 36 Carbamazepine
- 37 Carbamazepine
- 38 Carbamazepine
- 39 Carbamazepine
- 40 Carbamazepine
- 41 Carbamazepine
- 42 Carbamazepine
- 43 Carbamazepine
- 44 Carbamazepine
- 45 Carbamazepine
- 46 Carbamazepine
- 47 Carbamazepine
- 48 Carbamazepine
- 49 Carbamazepine
- 50 Carbamazepine
- 51 Carbamazepine
- 52 Carbamazepine
- 53 Carbamazepine
- 54 Carbamazepine
- 55 Carbamazepine
- 56 Carbamazepine
- 57 Carbamazepine
- 58 Carbamazepine
- 59 Carbamazepine
- 60 Carbamazepine

For peer review only

1 Carbamazepine  
2 Carbamazepine  
3 Carbamazepine  
4 Carbamazepine  
5 Carbamazepine  
6 Carbamazepine  
7 Carbamazepine  
8 Carbamazepine  
9 Carbamazepine  
10 Carbamazepine  
11 Carbamazepine  
12 Carbamazepine  
13 Carbamazepine  
14 Carbamazepine  
15 Carbamazepine  
16 Carbamazepine  
17 Carbamazepine  
18 Carbamazepine  
19 Carbamazepine  
20 Carbamazepine  
21 Carbamazepine  
22 Carbamazepine  
23 Carbamazepine  
24 Carbamazepine  
25 Carbamazepine  
26 Carbamazepine  
27 Carbamazepine  
28 Carbamazepine  
29 Carbamazepine  
30 Carbamazepine  
31 Carbamazepine  
32 Carbamazepine  
33 Carbamazepine  
34 Carbamazepine  
35 Carbamazepine  
36 Carbamazepine  
37 Carbamazepine  
38 Carbamazepine  
39 Carbamazepine  
40 Carbamazepine  
41 Carbamazepine  
42 Carbamazepine  
43 Carbamazepine  
44 Carbamazepine  
45 Carbamazepine  
46 Carbamazepine  
47 Clobazam  
48 Clobazam  
49 Clobazam  
50 Clobazam  
51 Clobazam  
52 Clobazam  
53 Clobazam  
54 Clobazam  
55 Clobazam  
56 Clobazam  
57 Clobazam  
58 Clobazam  
59 Clobazam  
60 Clobazam

For peer review only

- 1
- 2 Clobazam
- 3 Clobazam
- 4 Clobazam
- 5 Clobazam
- 6 Clobazam
- 7 Clobazam
- 8 Clobazam
- 9 Clobazam
- 10 Clobazam
- 11 Clobazam
- 12 Clobazam
- 13 Clobazam
- 14 Clobazam
- 15 Clomethiazole Edisilate
- 16 Clomethiazole Edisilate
- 17 Clonazepam
- 18 Clonazepam
- 19 Clonazepam
- 20 Clonazepam
- 21 Clonazepam
- 22 Clonazepam
- 23 Clonazepam
- 24 Clonazepam
- 25 Clonazepam
- 26 Clonazepam
- 27 Clonazepam
- 28 Clonazepam
- 29 Clonazepam
- 30 Clonazepam
- 31 Clonazepam
- 32 Clonazepam
- 33 Clonazepam
- 34 Clonazepam
- 35 Clonazepam
- 36 Clonazepam
- 37 Clonazepam
- 38 Clonazepam
- 39 Clonazepam
- 40 Clonazepam
- 41 Clonazepam
- 42 Clonazepam
- 43 Clonazepam
- 44 Clonazepam
- 45 Clonazepam
- 46 Clonazepam
- 47 Clonazepam
- 48 Clonazepam
- 49 Clonidine hydrochloride
- 50 Diazepam
- 51 Diazepam
- 52 Diazepam
- 53 Diazepam
- 54 Diazepam
- 55 Diazepam
- 56 Diazepam
- 57 Diazepam
- 58 Diazepam
- 59 Diazepam
- 60 Diazepam

For peer review only



1 Diazepam  
2 Diazepam  
3 Diazepam  
4 Diazepam  
5 Diazepam  
6 Diazepam  
7 Diazepam  
8 Diazepam  
9 Diazepam  
10 Diazepam  
11 Diazepam  
12 Diazepam  
13 Diazepam  
14 Diazepam  
15 Diazepam  
16 Diazepam  
17 Diazepam  
18 Diazepam  
19 Diazepam  
20 Diazepam  
21 Diazepam  
22 Diazepam  
23 Diazepam  
24 Diazepam  
25 Diazepam  
26 Diazepam  
27 Diazepam  
28 Diazepam  
29 Diazepam  
30 Diazepam  
31 Diazepam  
32 Diazepam  
33 Diazepam  
34 Diazepam  
35 Diazepam  
36 Diazepam  
37 Diazepam  
38 Diazepam  
39 Diazepam  
40 Diazepam  
41 Diazepam  
42 Diazepam  
43 Diazepam  
44 Diazepam  
45 Diazepam  
46 Diazepam  
47 Diazepam  
48 Diazepam  
49 Diazepam  
50 Diazepam  
51 Diazepam  
52 Diazepam  
53 Diazepam  
54 Diazepam  
55 Diazepam  
56 Diazepam  
57 Diazepam  
58 Diazepam  
59 Diazepam  
60 Diazepam

For peer review only

- 1 Diazepam
- 2 Diazepam
- 3 Diazepam
- 4 Diazepam
- 5 Diazepam
- 6 Diazepam
- 7 Diazepam
- 8 Diazepam
- 9 Diazepam
- 10 Diazepam
- 11 Diazepam
- 12 Diazepam
- 13 Diazepam
- 14 Diazepam
- 15 Eslicarbazepine Acetate
- 16 Eslicarbazepine Acetate
- 17 Ethosuximide
- 18 Ethosuximide
- 19 Ethosuximide
- 20 Ethosuximide
- 21 Ethosuximide
- 22 Ethosuximide
- 23 Ethosuximide
- 24 Ethosuximide
- 25 Ethosuximide
- 26 Ethosuximide
- 27 Felbamate
- 28 FosPhenytoin
- 29 FosPhenytoin
- 30 Gabapentin
- 31 Gabapentin
- 32 Gabapentin
- 33 Gabapentin
- 34 Gabapentin
- 35 Gabapentin
- 36 Gabapentin
- 37 Gabapentin
- 38 Gabapentin
- 39 Gabapentin
- 40 Gabapentin
- 41 Gabapentin
- 42 Gabapentin
- 43 Gabapentin
- 44 Gabapentin
- 45 Gabapentin
- 46 Gabapentin
- 47 Gabapentin
- 48 Gabapentin
- 49 Gabapentin
- 50 Gabapentin
- 51 Gabapentin
- 52 Gabapentin
- 53 Gabapentin
- 54 Gabapentin
- 55 Gabapentin
- 56 Gabapentin
- 57 Gabapentin
- 58 Gabapentin
- 59 Gabapentin
- 60 Gabapentin

For peer review only

1 Gabapentin  
2 Gabapentin  
3 Gabapentin  
4 Gabapentin  
5 Gabapentin  
6 Gabapentin  
7 Gabapentin  
8 Gabapentin  
9 Gabapentin  
10 Gabapentin  
11 Gabapentin  
12 Gabapentin  
13 Gabapentin  
14 Gabapentin  
15 Gabapentin  
16 Gabapentin  
17 Gabapentin  
18 Gabapentin  
19 Gabapentin  
20 Gabapentin  
21 Lacosamide  
22 Lacosamide  
23 Lacosamide  
24 Lacosamide  
25 Lacosamide  
26 Lacosamide  
27 Lacosamide  
28 Lacosamide  
29 Lacosamide  
30 Lacosamide  
31 Lacosamide  
32 Lacosamide  
33 Lacosamide  
34 Lacosamide  
35 Lacosamide  
36 Lamotrigine  
37 Lamotrigine  
38 Lamotrigine  
39 Lamotrigine  
40 Lamotrigine  
41 Lamotrigine  
42 Lamotrigine  
43 Lamotrigine  
44 Lamotrigine  
45 Lamotrigine  
46 Lamotrigine  
47 Lamotrigine  
48 Lamotrigine  
49 Lamotrigine  
50 Lamotrigine  
51 Lamotrigine  
52 Lamotrigine  
53 Lamotrigine  
54 Lamotrigine  
55 Lamotrigine  
56 Lamotrigine  
57 Lamotrigine  
58 Lamotrigine  
59 Lamotrigine  
60 Lamotrigine

For peer review only

- 1
- 2 Lamotrigine
- 3 Lamotrigine
- 4 Lamotrigine
- 5 Lamotrigine
- 6 Lamotrigine
- 7 Lamotrigine
- 8 Lamotrigine
- 9 Lamotrigine
- 10 Lamotrigine
- 11 Lamotrigine
- 12 Lamotrigine
- 13 Lamotrigine
- 14 Lamotrigine
- 15 Lamotrigine
- 16 Lamotrigine
- 17 Lamotrigine
- 18 Lamotrigine
- 19 Lamotrigine
- 20 Lamotrigine
- 21 Lamotrigine
- 22 Lamotrigine
- 23 Lamotrigine
- 24 Lamotrigine
- 25 Lamotrigine
- 26 Lamotrigine
- 27 Lamotrigine
- 28 Lamotrigine
- 29 Lamotrigine
- 30 Lamotrigine
- 31 Lamotrigine
- 32 Lamotrigine
- 33 Lamotrigine
- 34 Lamotrigine
- 35 Lamotrigine
- 36 Lamotrigine
- 37 Lamotrigine
- 38 Lamotrigine
- 39 Lamotrigine
- 40 Lamotrigine
- 41 Lamotrigine
- 42 Lamotrigine
- 43 Lamotrigine
- 44 Lamotrigine
- 45 Lamotrigine
- 46 Levetiracetam
- 47 Levetiracetam
- 48 Levetiracetam
- 49 Levetiracetam
- 50 Levetiracetam
- 51 Levetiracetam
- 52 Levetiracetam
- 53 Levetiracetam
- 54 Levetiracetam
- 55 Levetiracetam
- 56 Levetiracetam
- 57 Levetiracetam
- 58 Levetiracetam
- 59 Levetiracetam
- 60 Levetiracetam

For peer review only

1 Levetiracetam  
2 Levetiracetam  
3 Levetiracetam  
4 Levetiracetam  
5 Levetiracetam  
6 Levetiracetam  
7 Levetiracetam  
8 Levetiracetam  
9 Levetiracetam  
10 Levetiracetam  
11 Levetiracetam  
12 Levetiracetam  
13 Levetiracetam  
14 Levetiracetam  
15 Levetiracetam  
16 Levetiracetam  
17 Levetiracetam  
18 Levetiracetam  
19 Levetiracetam  
20 Levetiracetam  
21 Levetiracetam  
22 Levetiracetam  
23 Levetiracetam  
24 Levetiracetam  
25 Levetiracetam  
26 Levetiracetam  
27 Levetiracetam  
28 Levetiracetam  
29 Levetiracetam  
30 Levetiracetam  
31 Levetiracetam  
32 Levetiracetam  
33 Levetiracetam  
34 Levetiracetam  
35 Lorazepam  
36 Lorazepam  
37 Mesuximide  
38 Midazolam  
39 Midazolam  
40 Midazolam  
41 Midazolam  
42 Midazolam  
43 Midazolam  
44 Midazolam  
45 Midazolam  
46 Midazolam  
47 Midazolam  
48 Midazolam  
49 Midazolam  
50 Midazolam  
51 Midazolam  
52 Midazolam  
53 Midazolam  
54 Midazolam  
55 Midazolam  
56 Midazolam  
57 Midazolam  
58 Midazolam  
59 Midazolam Maleate  
60 Midazolam/Midazolam

1  
2 Olive oil/Paraldehyde  
3 Oxcarbazepine  
4 Oxcarbazepine  
5 Oxcarbazepine  
6 Oxcarbazepine  
7 Oxcarbazepine  
8 Oxcarbazepine  
9 Oxcarbazepine  
10 Oxcarbazepine  
11 Oxcarbazepine  
12 Paraldehyde  
13 Paraldehyde  
14 Paraldehyde  
15 Perampanel  
16 Perampanel  
17 Perampanel  
18 Perampanel  
19 Perampanel  
20 Perampanel  
21 Perampanel  
22 Perampanel  
23 Perampanel  
24 Perampanel  
25 Perampanel  
26 Perampanel  
27 Perampanel  
28 Perampanel  
29 Perampanel  
30 Phenobarbital  
31 Phenobarbital  
32 Phenobarbital  
33 Phenobarbital  
34 Phenobarbital  
35 Phenobarbital  
36 Phenobarbital  
37 Phenobarbital  
38 Phenobarbital  
39 Phenobarbital  
40 Phenobarbital  
41 Phenobarbital  
42 Phenobarbital  
43 Phenobarbital  
44 Phenobarbital  
45 Phenobarbital  
46 Phenobarbital  
47 Phenobarbital  
48 Phenobarbital  
49 Phenobarbital  
50 Phenobarbital  
51 Phenobarbital  
52 Phenobarbital  
53 Phenobarbital  
54 Phenobarbital  
55 Phenobarbital  
56 Phenobarbital  
57 Phenobarbital  
58 Phenobarbital  
59 Phenobarbital  
60 Phenobarbital

For peer review only

1  
2 Phenobarbital  
3 Phenobarbital  
4 Phenobarbital  
5 Phenobarbital  
6 Phenobarbital  
7 Phenobarbital  
8 Phenobarbital  
9 Phenobarbital  
10 Phenobarbital  
11 Phenobarbital  
12 Phenobarbital  
13 Phenobarbital  
14 Phenobarbital  
15 Phenobarbital  
16 Phenobarbital  
17 Phenobarbital  
18 Phenytoin  
19 Phenytoin  
20 Phenytoin  
21 Phenytoin  
22 Phenytoin  
23 Phenytoin  
24 Phenytoin  
25 Phenytoin  
26 Phenytoin  
27 Phenytoin  
28 Phenytoin  
29 Phenytoin  
30 Phenytoin  
31 Phenytoin  
32 Phenytoin  
33 Phenytoin  
34 Phenytoin  
35 Phenytoin  
36 Phenytoin  
37 Phenytoin  
38 Phenytoin  
39 Phenytoin  
40 Phenytoin  
41 Phenytoin  
42 Phenytoin  
43 Phenytoin  
44 Phenytoin  
45 Phenytoin  
46 Phenytoin  
47 Phenytoin  
48 Phenytoin  
49 Phenytoin  
50 Phenytoin  
51 Phenytoin  
52 Phenytoin  
53 Phenytoin  
54 Phenytoin  
55 Phenytoin  
56 Phenytoin  
57 Phenytoin  
58 Phenytoin  
59 Phenytoin  
60 Phenytoin

For peer review only



1  
2 Phenytoin  
3 Phenytoin  
4 Phenytoin  
5 Phenytoin  
6 Phenytoin  
7 Phenytoin  
8 Phenytoin  
9 Phenytoin  
10 Phenytoin  
11 Phenytoin  
12 Phenytoin  
13 Phenytoin  
14 Phenytoin  
15 Phenytoin  
16 Phenytoin  
17 Phenytoin  
18 Phenytoin  
19 Phenytoin  
20 Potassium bromide/Ammonium bicarbonate/Liquorice liquid extract/Anise oil/Ethanol 90%/Chloroforr  
21 Primidone  
22 Primidone  
23 Primidone  
24 Primidone  
25 Primidone  
26 Primidone  
27 Primidone  
28 Primidone  
29 Primidone  
30 Primidone  
31 Primidone  
32 Primidone  
33 Primidone  
34 Primidone  
35 Primidone  
36 Primidone  
37 Primidone  
38 Primidone  
39 Primidone  
40 Primidone  
41 Primidone  
42 Primidone  
43 Primidone  
44 Primidone  
45 Primidone  
46 Primidone  
47 Primidone  
48 Primidone  
49 Pyridoxine hydrochloride  
50 Pyridoxine hydrochloride  
51 Pyridoxine hydrochloride  
52 Pyridoxine hydrochloride  
53 Pyridoxine hydrochloride  
54 Pyridoxine hydrochloride  
55 Pyridoxine Hydrochloride  
56 Pyridoxine hydrochloride  
57 Pyridoxine hydrochloride  
58 Pyridoxine hydrochloride  
59 Pyridoxine hydrochloride  
60 Retigabine

1 Retigabine  
2 Retigabine  
3 Retigabine  
4 Retigabine  
5 Retigabine  
6 Retigabine  
7 Retigabine  
8 Retigabine  
9 Retigabine  
10 Retigabine  
11 Retigabine  
12 Retigabine  
13 Retigabine  
14 Rufinamide  
15 Rufinamide  
16 Rufinamide  
17 Rufinamide  
18 Rufinamide  
19 Rufinamide  
20 Rufinamide  
21 Rufinamide  
22 Sodium valproate  
23 Sodium valproate  
24 Sodium valproate  
25 Sodium valproate  
26 Sodium valproate  
27 Sodium valproate  
28 Sodium valproate  
29 Sodium valproate  
30 Sodium valproate  
31 Sodium valproate  
32 Sodium valproate  
33 Sodium valproate  
34 Sodium valproate  
35 Sodium valproate  
36 Sodium valproate  
37 Sodium valproate  
38 Sodium valproate  
39 Sodium valproate  
40 Sodium valproate  
41 Sodium valproate  
42 Sodium valproate  
43 Sodium valproate  
44 Sodium valproate  
45 Sodium valproate  
46 Sodium valproate  
47 Sodium valproate  
48 Sodium valproate  
49 Sodium valproate  
50 Sodium valproate  
51 Sodium valproate  
52 Sodium valproate  
53 Sodium valproate  
54 Sodium valproate  
55 Sodium valproate  
56 Sodium valproate  
57 Sodium valproate  
58 Sodium valproate  
59 Sodium valproate  
60 Sodium valproate

For peer review only

- 1
- 2 Sodium valproate
- 3 Sodium valproate
- 4 Sodium valproate
- 5 Sodium valproate
- 6 Sodium valproate
- 7 Sodium valproate
- 8 Sodium valproate
- 9 Sodium valproate
- 10 Sodium valproate
- 11 Sodium valproate
- 12 Sodium valproate
- 13 Sodium valproate
- 14 Sodium valproate
- 15 Sodium valproate
- 16 Sodium valproate
- 17 Sodium valproate
- 18 Sodium valproate
- 19 Sodium valproate
- 20 Sodium valproate
- 21 Sodium valproate
- 22 Sodium valproate
- 23 Sodium valproate
- 24 Sodium valproate
- 25 Sodium valproate
- 26 Sodium valproate
- 27 Sodium valproate
- 28 Sodium valproate
- 29 Sodium valproate
- 30 Sodium valproate
- 31 Sodium valproate
- 32 Sodium valproate
- 33 Sodium valproate
- 34 Sodium valproate
- 35 Sodium valproate
- 36 Sodium valproate
- 37 Sodium valproate
- 38 Sodium valproate
- 39 Sodium valproate
- 40 Sodium valproate
- 41 Sodium valproate
- 42 Sodium valproate
- 43 Sodium valproate
- 44 Sodium valproate
- 45 Sodium valproate
- 46 Sodium valproate
- 47 Sodium valproate
- 48 Sodium valproate
- 49 Sodium valproate
- 50 Sodium valproate
- 51 Sodium valproate
- 52 Sodium valproate
- 53 Sodium valproate
- 54 Sodium valproate
- 55 Sodium valproate
- 56 Sodium valproate
- 57 Sodium valproate
- 58 Sodium valproate
- 59 Sodium valproate
- 60 Sodium valproate

For peer review only

1 Sodium valproate  
2 Sodium valproate  
3 Sodium valproate  
4 Sodium valproate  
5 Stiripentol  
6 Stiripentol  
7 Stiripentol  
8 Stiripentol  
9 Stiripentol  
10 Sultiame  
11 Sultiame  
12 Sultiame  
13 Sultiame  
14 Thiopental sodium  
15 Tiagabine  
16 Tiagabine  
17 Tiagabine  
18 Tiagabine  
19 Tiagabine  
20 Tiagabine  
21 Tiagabine  
22 Tiagabine  
23 Tiagabine  
24 Tiagabine  
25 Tiagabine  
26 Topiramate  
27 Topiramate  
28 Topiramate  
29 Topiramate  
30 Topiramate  
31 Topiramate  
32 Topiramate  
33 Topiramate  
34 Topiramate  
35 Topiramate  
36 Topiramate  
37 Topiramate  
38 Topiramate  
39 Topiramate  
40 Topiramate  
41 Topiramate  
42 Topiramate  
43 Topiramate  
44 Topiramate  
45 Topiramate  
46 Topiramate  
47 Topiramate  
48 Topiramate  
49 Topiramate  
50 Topiramate  
51 Topiramate  
52 Topiramate  
53 Topiramate  
54 Topiramate  
55 Topiramate  
56 Topiramate  
57 Topiramate  
58 Topiramate  
59 Topiramate  
60 Topiramate

1  
2 Topiramate  
3 Topiramate  
4 Topiramate  
5 Topiramate  
6 Topiramate  
7 Topiramate  
8 Topiramate  
9 Topiramate  
10 Topiramate  
11 Topiramate  
12 Topiramate  
13 Valproate semisodium  
14 Valproic acid  
15 Valproic acid  
16 Valproic acid  
17 Valproic acid  
18 Valproic acid  
19 Valproic acid  
20 Valproic acid  
21 Vigabatrin  
22 Vigabatrin  
23 Vigabatrin  
24 Vigabatrin  
25 Vigabatrin  
26 Vigabatrin  
27 Vigabatrin  
28 Zonisamide  
29 Zonisamide  
30 Zonisamide  
31 Zonisamide  
32 Zonisamide  
33 Zonisamide  
34 Zonisamide  
35 Zonisamide  
36 Zonisamide  
37 Zonisamide  
38 Clobazam  
39 Gabapentin  
40 Phenobarbital  
41 Clobazam  
42 Clobazam  
43 Levetiracetam  
44 Sodium valproate  
45 Phenytoin  
46 Levetiracetam  
47 Levetiracetam  
48 Levetiracetam  
49 Zonisamide  
50 Levetiracetam  
51 Levetiracetam  
52 Phenobarbital  
53 Clonazepam  
54 Clonazepam  
55 Lacosamide  
56 Phenytoin  
57 Clonazepam  
58 Lamotrigine  
59 Primidone  
60 Carbamazepine

For peer review only

1  
2 Phenobarbital  
3 Phenobarbital  
4 Phenobarbital  
5 Paraldehyde  
6 Paraldehyde  
7 Paraldehyde  
8 Midazolam  
9 Paraldehyde  
10 Gabapentin  
11 Gabapentin  
12 Gabapentin  
13 Gabapentin  
14 Gabapentin  
15 Brivaracetam  
16 Topiramate  
17 Topiramate  
18  
19  
20  
21  
22  
23  
24  
25  
26  
27  
28  
29  
30  
31  
32  
33  
34  
35  
36  
37  
38  
39  
40  
41  
42  
43  
44  
45  
46  
47  
48  
49  
50  
51  
52  
53  
54  
55  
56  
57  
58  
59  
60

For peer review only

1  
2  
3  
4  
5  
6  
7  
8  
9  
10  
11  
12  
13  
14  
15  
16  
17  
18  
19  
20  
21  
22  
23  
24  
25  
26  
27  
28  
29  
30  
31  
32  
33  
34  
35  
36  
37  
38  
39  
40  
41  
42  
43  
44  
45  
46  
47  
48  
49  
50  
51  
52  
53  
54  
55  
56  
57  
58  
59  
60

For peer review only



1  
2  
3  
4  
5  
6  
7  
8  
9  
10  
11  
12  
13  
14  
15  
16  
17  
18  
19  
20  
21  
22  
23  
24  
25  
26  
27  
28  
29  
30  
31  
32  
33  
34  
35  
36  
37  
38  
39  
40  
41  
42  
43  
44  
45  
46  
47  
48  
49  
50  
51  
52  
53  
54  
55  
56  
57  
58  
59  
60

For peer review only

1  
2  
3  
4  
5  
6  
7  
8  
9  
10  
11  
12  
13  
14  
15  
16  
17  
18  
19  
20  
21  
22  
23  
24  
25  
26  
27  
28  
29  
30  
31  
32  
33  
34  
35  
36  
37  
38  
39  
40  
41  
42  
43  
44  
45  
46  
47  
48  
49  
50  
51  
52  
53  
54  
55  
56  
57  
58  
59  
60

For peer review only

1  
2  
3  
4  
5  
6  
7  
8  
9  
10  
11  
12  
13  
14  
15  
16  
17  
18  
19  
20  
21  
22  
23  
24  
25  
26  
27  
28  
29  
30  
31  
32  
33  
34  
35  
36  
37  
38  
39  
40  
41  
42  
43  
44  
45  
46  
47  
48  
49  
50  
51  
52  
53  
54  
55  
56  
57  
58  
59  
60

For peer review only

1  
2  
3  
4  
5  
6  
7  
8  
9  
10  
11  
12  
13  
14  
15  
16  
17  
18  
19  
20  
21  
22  
23  
24  
25  
26  
27  
28  
29  
30  
31  
32  
33  
34  
35  
36  
37  
38  
39  
40  
41  
42  
43  
44  
45  
46  
47  
48  
49  
50  
51  
52  
53  
54  
55  
56  
57  
58  
59  
60

For peer review only

1  
2  
3  
4  
5  
6  
7  
8  
9  
10  
11  
12  
13  
14  
15  
16  
17  
18  
19  
20  
21  
22  
23  
24  
25  
26  
27  
28  
29  
30  
31  
32  
33  
34  
35  
36  
37  
38  
39  
40  
41  
42  
43  
44  
45  
46  
47  
48  
49  
50  
51  
52  
53  
54  
55  
56  
57  
58  
59  
60

For peer review only

1  
2  
3  
4  
5  
6  
7  
8  
9  
10  
11  
12  
13  
14  
15  
16  
17  
18  
19  
20  
21  
22  
23  
24  
25  
26  
27  
28  
29  
30  
31  
32  
33  
34  
35  
36  
37  
38  
39  
40  
41  
42  
43  
44  
45  
46  
47  
48  
49  
50  
51  
52  
53  
54  
55  
56  
57  
58  
59  
60

For peer review only

1  
2  
3  
4  
5  
6  
7  
8  
9  
10  
11  
12  
13  
14  
15  
16  
17  
18  
19  
20  
21  
22  
23  
24  
25  
26  
27  
28  
29  
30  
31  
32  
33  
34  
35  
36  
37  
38  
39  
40  
41  
42  
43  
44  
45  
46  
47  
48  
49  
50  
51  
52  
53  
54  
55  
56  
57  
58  
59  
60

For peer review only



1  
2  
3  
4  
5  
6  
7  
8  
9  
10  
11  
12  
13  
14  
15  
16  
17  
18  
19  
20  
21  
22  
23  
24  
25  
26  
27  
28  
29  
30  
31  
32  
33  
34  
35  
36  
37  
38  
39  
40  
41  
42  
43  
44  
45  
46  
47  
48  
49  
50  
51  
52  
53  
54  
55  
56  
57  
58  
59  
60

For peer review only

1  
2  
3  
4  
5  
6  
7  
8  
9  
10  
11  
12  
13  
14  
15  
16  
17  
18  
19  
20  
21  
22  
23  
24  
25  
26  
27  
28  
29  
30  
31  
32  
33  
34  
35  
36  
37  
38  
39  
40  
41  
42  
43  
44  
45  
46  
47  
48  
49  
50  
51  
52  
53  
54  
55  
56  
57  
58  
59  
60

For peer review only

1  
2  
3  
4  
5  
6  
7  
8  
9  
10  
11  
12  
13  
14  
15  
16  
17  
18  
19  
20  
21  
22  
23  
24  
25  
26  
27  
28  
29  
30  
31  
32  
33  
34  
35  
36  
37  
38  
39  
40  
41  
42  
43  
44  
45  
46  
47  
48  
49  
50  
51  
52  
53  
54  
55  
56  
57  
58  
59  
60

For peer review only

1  
2  
3  
4  
5  
6  
7  
8  
9  
10  
11  
12  
13  
14  
15  
16  
17  
18  
19  
20  
21  
22  
23  
24  
25  
26  
27  
28  
29  
30  
31  
32  
33  
34  
35  
36  
37  
38  
39  
40  
41  
42  
43  
44  
45  
46  
47  
48  
49  
50  
51  
52  
53  
54  
55  
56  
57  
58  
59  
60

n

For peer review only

## STROBE Statement—checklist of items that should be included in reports of observational studies

|                           | Item No | Recommendation                                                                                                                                                                                                                                                                                                                                                                                                                                                         | Page No                         |
|---------------------------|---------|------------------------------------------------------------------------------------------------------------------------------------------------------------------------------------------------------------------------------------------------------------------------------------------------------------------------------------------------------------------------------------------------------------------------------------------------------------------------|---------------------------------|
| <b>Title and abstract</b> | 1       | (a) Indicate the study's design with a commonly used term in the title or the abstract                                                                                                                                                                                                                                                                                                                                                                                 | 1                               |
|                           |         | (b) Provide in the abstract an informative and balanced summary of what was done and what was found                                                                                                                                                                                                                                                                                                                                                                    | 2                               |
| <b>Introduction</b>       |         |                                                                                                                                                                                                                                                                                                                                                                                                                                                                        |                                 |
| Background/rationale      | 2       | Explain the scientific background and rationale for the investigation being reported                                                                                                                                                                                                                                                                                                                                                                                   | 4                               |
| Objectives                | 3       | State specific objectives, including any prespecified hypotheses                                                                                                                                                                                                                                                                                                                                                                                                       | 4                               |
| <b>Methods</b>            |         |                                                                                                                                                                                                                                                                                                                                                                                                                                                                        |                                 |
| Study design              | 4       | Present key elements of study design early in the paper                                                                                                                                                                                                                                                                                                                                                                                                                | 4,5                             |
| Setting                   | 5       | Describe the setting, locations, and relevant dates, including periods of recruitment, exposure, follow-up, and data collection                                                                                                                                                                                                                                                                                                                                        | 4,5                             |
| Participants              | 6       | (a) <i>Cohort study</i> —Give the eligibility criteria, and the sources and methods of selection of participants. Describe methods of follow-up<br><i>Case-control study</i> —Give the eligibility criteria, and the sources and methods of case ascertainment and control selection. Give the rationale for the choice of cases and controls<br><i>Cross-sectional study</i> —Give the eligibility criteria, and the sources and methods of selection of participants | 5                               |
|                           |         | (b) <i>Cohort study</i> —For matched studies, give matching criteria and number of exposed and unexposed<br><i>Case-control study</i> —For matched studies, give matching criteria and the number of controls per case                                                                                                                                                                                                                                                 | 5                               |
| Variables                 | 7       | Clearly define all outcomes, exposures, predictors, potential confounders, and effect modifiers. Give diagnostic criteria, if applicable                                                                                                                                                                                                                                                                                                                               | 5, 6 supplemental file 1 and 2  |
| Data sources/measurement  | 8*      | For each variable of interest, give sources of data and details of methods of assessment (measurement). Describe comparability of assessment methods if there is more than one group                                                                                                                                                                                                                                                                                   | 5, 6, supplemental file 1 and 2 |
| Bias                      | 9       | Describe any efforts to address potential sources of bias                                                                                                                                                                                                                                                                                                                                                                                                              | N/A                             |
| Study size                | 10      | Explain how the study size was arrived at                                                                                                                                                                                                                                                                                                                                                                                                                              | 5,6                             |
| Quantitative variables    | 11      | Explain how quantitative variables were handled in the analyses. If applicable, describe which groupings were chosen and why                                                                                                                                                                                                                                                                                                                                           | 5,6                             |
| Statistical methods       | 12      | (a) Describe all statistical methods, including those used to control for confounding                                                                                                                                                                                                                                                                                                                                                                                  | 6                               |
|                           |         | (b) Describe any methods used to examine subgroups and interactions                                                                                                                                                                                                                                                                                                                                                                                                    | 6                               |
|                           |         | (c) Explain how missing data were addressed                                                                                                                                                                                                                                                                                                                                                                                                                            | 5                               |

1  
2  
3  
4  
5  
6  
7  
8  
9  
10  
11  
12  
13  
14  
15  
16  
17  
18  
19  
20  
21  
22  
23  
24  
25  
26  
27  
28  
29  
30  
31  
32  
33  
34  
35  
36  
37  
38  
39  
40  
41  
42  
43  
44  
45  
46  
47  
48  
49  
50  
51  
52  
53  
54  
55  
56  
57  
58  
59  
60

(d) *Cohort study*—If applicable, explain how loss to follow-up was addressed

5

*Case-control study*—If applicable, explain how matching of cases and controls was addressed

*Cross-sectional study*—If applicable, describe analytical methods taking account of sampling strategy

(e) Describe any sensitivity analyses

Continued on next page

For peer review only

1  
2  
3  
4  
5  
6  
7  
8  
9  
10  
11  
12  
13  
14  
15  
16  
17  
18  
19  
20  
21  
22  
23  
24  
25  
26  
27  
28  
29  
30  
31  
32  
33  
34  
35  
36  
37  
38  
39  
40  
41  
42  
43  
44  
45  
46  
47  
48  
49  
50  
51  
52  
53  
54  
55  
56  
57  
58  
59  
60**Results**

|                  |     |                                                                                                                                                                                                              |             |
|------------------|-----|--------------------------------------------------------------------------------------------------------------------------------------------------------------------------------------------------------------|-------------|
| Participants     | 13* | (a) Report numbers of individuals at each stage of study—eg numbers potentially eligible, examined for eligibility, confirmed eligible, included in the study, completing follow-up, and analysed            | Fig 1       |
|                  |     | (b) Give reasons for non-participation at each stage                                                                                                                                                         | Fig 1       |
|                  |     | (c) Consider use of a flow diagram                                                                                                                                                                           | Fig 1       |
| Descriptive data | 14* | (a) Give characteristics of study participants (eg demographic, clinical, social) and information on exposures and potential confounders                                                                     | 6           |
|                  |     | (b) Indicate number of participants with missing data for each variable of interest                                                                                                                          | N/A         |
|                  |     | (c) <i>Cohort study</i> —Summarise follow-up time (eg, average and total amount)                                                                                                                             | N/A         |
| Outcome data     | 15* | <i>Cohort study</i> —Report numbers of outcome events or summary measures over time                                                                                                                          | table 1 - 3 |
|                  |     | <i>Case-control study</i> —Report numbers in each exposure category, or summary measures of exposure                                                                                                         | table 4     |
|                  |     | <i>Cross-sectional study</i> —Report numbers of outcome events or summary measures                                                                                                                           |             |
| Main results     | 16  | (a) Give unadjusted estimates and, if applicable, confounder-adjusted estimates and their precision (eg, 95% confidence interval). Make clear which confounders were adjusted for and why they were included | 9,10        |
|                  |     | (b) Report category boundaries when continuous variables were categorized                                                                                                                                    | table 4     |
|                  |     | (c) If relevant, consider translating estimates of relative risk into absolute risk for a meaningful time period                                                                                             | N/A         |
| Other analyses   | 17  | Report other analyses done—eg analyses of subgroups and interactions, and sensitivity analyses                                                                                                               | 9           |

**Discussion**

|                  |    |                                                                                                                                                                            |       |
|------------------|----|----------------------------------------------------------------------------------------------------------------------------------------------------------------------------|-------|
| Key results      | 18 | Summarise key results with reference to study objectives                                                                                                                   | 8,9   |
| Limitations      | 19 | Discuss limitations of the study, taking into account sources of potential bias or imprecision. Discuss both direction and magnitude of any potential bias                 | 12,13 |
| Interpretation   | 20 | Give a cautious overall interpretation of results considering objectives, limitations, multiplicity of analyses, results from similar studies, and other relevant evidence | 10,11 |
| Generalisability | 21 | Discuss the generalisability (external validity) of the study results                                                                                                      | 13    |

**Other information**

|         |    |                                                                                                                                                               |    |
|---------|----|---------------------------------------------------------------------------------------------------------------------------------------------------------------|----|
| Funding | 22 | Give the source of funding and the role of the funders for the present study and, if applicable, for the original study on which the present article is based | 14 |
|---------|----|---------------------------------------------------------------------------------------------------------------------------------------------------------------|----|

\*Give information separately for cases and controls in case-control studies and, if applicable, for exposed and unexposed groups in cohort and cross-sectional studies.

**Note:** An Explanation and Elaboration article discusses each checklist item and gives methodological background and published examples of transparent reporting. The STROBE checklist is best used in conjunction with this article (freely available on the Web sites of PLoS Medicine at <http://www.plosmedicine.org/>, Annals of Internal Medicine at <http://www.annals.org/>, and Epidemiology at <http://www.epidem.com/>). Information on the STROBE Initiative is available at [www.strobe-statement.org](http://www.strobe-statement.org).
