# Supplementary material for: Epilepsy and mortality: a retrospective cohort analysis with a nested case–control study identifying causes and risk factors from primary care and linkage-derived data
Source: PubMed Central journal article supplement — BMJ Open. 2021 Oct 25;11(10):e052841. doi: 10.1136/bmjopen-2021-052841 (PMC8547505; doi:10.1136/bmjopen-2021-052841), 2021-10-25
Supplement: bmjopen-2021-052841supp001.pdf [file bmjopen-2021-052841supp001.pdf]

**SUPPLEMENTAL FILE 1****Codes used to identify epilepsy in the CPRD****Table S1. Codes used to identify epilepsy in the CPRD**

| medcode | readcode | readterm                                              |
|---------|----------|-------------------------------------------------------|
| 573     | F25..00  | Epilepsy                                              |
| 85113   | F250 A   |                                                       |
| 11186   | F250.00  | Generalised nonconvulsive epilepsy                    |
| 2907    | F250000  | Petit mal (minor) epilepsy                            |
| 1715    | F250011  | Epileptic absences                                    |
| 24309   | F250200  | Epileptic seizures - atonic                           |
| 31830   | F250300  | Epileptic seizures - akinetic                         |
| 34792   | F250500  | Lennox-Gastaut syndrome                               |
| 59185   | F250y00  | Other specified generalised nonconvulsive epilepsy    |
| 44252   | F250z00  | Generalised nonconvulsive epilepsy NOS                |
| 26144   | F251.00  | Generalised convulsive epilepsy                       |
| 95216   | F2510    |                                                       |
| 988     | F251000  | Grand mal (major) epilepsy                            |
| 22804   | F251011  | Tonic-clonic epilepsy                                 |
| 49340   | F251111  | Otohar syndrome                                       |
| 18471   | F251200  | Epileptic seizures - clonic                           |
| 4801    | F251300  | Epileptic seizures - myoclonic                        |
| 5152    | F251400  | Epileptic seizures - tonic                            |
| 8187    | F251500  | Tonic-clonic epilepsy                                 |
| 45927   | F251y00  | Other specified generalised convulsive epilepsy       |
| 40806   | F251z00  | Generalised convulsive epilepsy NOS                   |
| 9886    | F252.00  | Petit mal status                                      |
| 5117    | F253.00  | Grand mal status                                      |
| 4093    | F253.11  | Status epilepticus                                    |
| 32288   | F254.00  | Partial epilepsy with impairment of consciousness     |
| 3175    | F254000  | Temporal lobe epilepsy                                |
| 23634   | F254100  | Psychomotor epilepsy                                  |
| 36203   | F254200  | Psychosensory epilepsy                                |
| 55665   | F254300  | Limbic system epilepsy                                |
| 34079   | F254400  | Epileptic automatism                                  |
| 11394   | F254500  | Complex partial epileptic seizure                     |
| 31920   | F254z00  | Partial epilepsy with impairment of consciousness NOS |
| 26015   | F255.00  | Partial epilepsy without impairment of consciousness  |
| 9569    | F255000  | Jacksonian, focal or motor epilepsy                   |
| 5525    | F255011  | Focal epilepsy                                        |
| 65699   | F255012  | Motor epilepsy                                        |

|        |         |                                                                              |
|--------|---------|------------------------------------------------------------------------------|
| 48134  | F255100 | Sensory induced epilepsy                                                     |
| 73542  | F255300 | Visceral reflex epilepsy                                                     |
| 98870  | F255311 | Partial epilepsy with autonomic symptoms                                     |
| 55739  | F255400 | Visual reflex epilepsy                                                       |
| 68946  | F255500 | Unilateral epilepsy                                                          |
| 40105  | F255600 | Simple partial epileptic seizure                                             |
| 26733  | F255y00 | Partial epilepsy without impairment of consciousness OS                      |
| 27526  | F255z00 | Partial epilepsy without impairment of consciousness NOS                     |
| 71719  | F257.00 | Kojevnikov's epilepsy                                                        |
| 30604  | F25B.00 | Alcohol-induced epilepsy                                                     |
| 30816  | F25C.00 | Drug-induced epilepsy                                                        |
| 56359  | F25D.00 | Menstrual epilepsy                                                           |
| 65673  | F25E.00 | Stress-induced epilepsy                                                      |
| 30635  | F25F.00 | Photosensitive epilepsy                                                      |
| 106571 | F25H.00 | Generalised seizure                                                          |
| 6271   | F25X.00 | Status epilepticus, unspecified                                              |
| 38307  | F25y.00 | Other forms of epilepsy                                                      |
| 55260  | F25y000 | Cursive (running) epilepsy                                                   |
| 53483  | F25y100 | Gelastical epilepsy                                                          |
| 9887   | F25y200 | Local (focal) (partial) idiopathic epileptic syndrome<br>seizure local onset |
| 25330  | F25y300 | Complex partial status epilepticus                                           |
| 96641  | F25y500 | Panayiotopoulos syndrome                                                     |
| 9979   | F25yz00 | Other forms of epilepsy NOS                                                  |
| 9747   | F25z.00 | Epilepsy NOS                                                                 |
| 3607   | F25z.11 | Fit (in known epileptic) NOS                                                 |
| 99731  | Fyu5000 | [X]Other generalized epilepsy and epileptic syndromes                        |
| 69831  | Fyu5100 | [X]Other epilepsy                                                            |
| 59120  | Fyu5200 | [X]Other status epilepticus                                                  |
| 71801  | Fyu5900 | [X]Status epilepticus, unspecified                                           |
| 4109   | SC20000 | Traumatic epilepsy                                                           |
| 37644  | F132100 | Progressive myoclonic epilepsy                                               |

### Definition of variables

Lists of Medcodes and corresponding Read codes used for each variable can be found in Supplemental file 2. An initial list of Read codes was created for each variable, either based on previous research or by searching specific words in a Read code browser. Medcodes were matched to the Read code list using the CPRD Medical Dictionary. An additional search of the Medcodes was conducted to ensure all appropriate codes were used. Medcodes were used during the analysis in STATA as these are numeric codes. For variables using medication data, lists of prodcodes were generated by searching the CPRD product code list, which lists prodcodes against British National Formulary (BNF) information.

- **Age:** For cases: age = year of death – year of birth. For matched controls: age = year of death of the matched case – year of birth.

For epilepsy related factors (ie. Relating to seizures and treatment) and lifestyle factors, data from the CPRD was used from the date of death of the matched case up to 12 months prior. These variables are listed below:

- **Emergency department visit or emergency admission:** Emergency admissions or visits to emergency centres were identified from “Clinical data” from CPRD. These included keywords: seen by emergency clinician, in accident and emergency, emergency admission. A full list is available in Supplemental File 2.
- **Number of antiepileptic drugs (AEDs):** Number of different types of AEDs prescribed in 12 months were grouped into categories: 0, 1, 2, 3 and “4 or more”. Product codes (“Prodcode”) were used from “Therapy data” to identify AEDs in the CPRD. A full list of Prodcodes and corresponding definitions is available in Supplemental File 2.
- **Status epilepticus:** recorded status epilepticus code in previous 12 months (medcode: 4093; readcode: F253.11) clinical CPRD data.<sup>1</sup>
- **Depression:** the variable was coded as either a documented diagnostic medcode related to “depression” from “Clinical data” or a prescription of antidepressants from “Therapy data” in the previous 12 months.<sup>1</sup> Antidepressants were identified through their product codes (prodcode) from therapy data. A list of medcodes for depression and prodcodes for antidepressants can be found in Supplemental File 2.
- **Smoking status:** Data was coded from medcodes related to smoking or smoking cessation interventions from “Clinical data” and overall smoking status if available in the CPRD “Additional Files”. For any patients that did not have a smoking status recording in the 12-month data period, the last known recording from clinical data was used, as previously described by Booth et al.<sup>2</sup> The list of medcodes and readcodes used to identify smoking status can be found in Supplemental File 2.
- **Injury:** any injury documented in “Clinical data” was used. A list of medcodes from clinical CPRD data included: injuries, fractures, dislocations, burns, bruising, contusions, lacerations, abrasions, concussions and wounds.<sup>1</sup> A full list of medcodes and corresponding Read codes can be found in Supplemental File 2.
- **Seizure freedom:** recoded seizure freedom for > 12 months (medcode: 11015; readcode: 667F.00) in “Clinical data” from CPRD.<sup>1</sup>

**For co-morbidity, data coded for patient’s lifetime (within start and end dates with acceptable quality data recording):**

- **Dementia:** code list included any medcodes for “dementia” and “Alzheimer’s” in patient history from “Clinical data” in the CPRD. The list of medcodes and corresponding Read codes can be found in Supplemental File 2.

- **Stroke:** code list included stroke, cerebral ischemia/arterial occlusion/haemorrhage/infarction. embolism in patient history from “Clinical data” in the CPRD. The list of medcodes and corresponding Read codes can be found in Supplemental File 2.

**Table S2.** Main cause of death of PWE registered in the CPRD between 2005 – 2013 by year

| ICD-10 category (ICD-10 code)                                                                     | 2005 (%)   | 2006 (%)   | 2007 (%)   | 2008 (%)   | 2009 (%)   | 2010 (%)   | 2011 (%)   | 2012 (%)   | 2013 (%)   |
|---------------------------------------------------------------------------------------------------|------------|------------|------------|------------|------------|------------|------------|------------|------------|
| Epilepsy (G40-G41)                                                                                | 6.3        | 6.3        | 5.9        | 6.1        | 5.7        | 6.2        | 5.2        | 7.1        | 5.2        |
| Certain infectious and parasitic diseases (A00-B99)                                               | 1.0        | 1.6        | 1.1        | 1.0        | 0.7        | 0.9        | 0.5        | 1.2        | 0.5        |
| Neoplasms (C00-D48)                                                                               | 20.9       | 19.4       | 17.6       | 19.6       | 19.0       | 18.1       | 21.8       | 21.4       | 20.9       |
| Diseases of the blood and blood-forming organs (D50-D89)                                          | 0.6        | 0.0        | 0.4        | 0.3        | 0.1        | 0.0        | 0.2        | 0.3        | 0.3        |
| Endocrine, nutritional and metabolic diseases (E00-E90)                                           | 1.5        | 1.7        | 1.7        | 1.1        | 1.6        | 1.7        | 1.1        | 1.0        | 1.1        |
| Mental and behavioural disorders (F00-F99)                                                        | 4.6        | 3.8        | 5.8        | 5.0        | 6.6        | 4.5        | 10.7       | 10.9       | 10.5       |
| Diseases of the nervous system (G00-G37, G43-G99)                                                 | 4.6        | 5.1        | 5.1        | 6.0        | 7.5        | 5.5        | 7.3        | 5.6        | 7.2        |
| Diseases of the circulatory system (I00-I99)                                                      | 33.8       | 35.1       | 34.0       | 34.0       | 31.3       | 33.1       | 28.3       | 26.8       | 28.1       |
| Diseases of the respiratory system (J00-J99)                                                      | 12.9       | 16.3       | 14.7       | 13.6       | 13.0       | 14.5       | 12.6       | 12.7       | 12.5       |
| Diseases of the digestive system (K00-KK93)                                                       | 3.8        | 3.3        | 4.3        | 4.6        | 4.1        | 4.8        | 4.9        | 4.9        | 5.0        |
| Diseases of the skin and subcutaneous tissue (L00-L99)                                            | 0.0        | 0.1        | 0.5        | 0.3        | 0.4        | 0.3        | 0.1        | 0.0        | 0.1        |
| Diseases of the musculoskeletal system and connective tissue (M00-M99)                            | 0.4        | 0.0        | 0.8        | 0.3        | 1.2        | 0.2        | 0.7        | 0.4        | 0.8        |
| Diseases of the genitourinary system (N00-N99)                                                    | 2.9        | 2.5        | 2.4        | 1.8        | 2.8        | 3.1        | 0.7        | 2.1        | 1.2        |
| Congenital malformations, deformations and chromosomal abnormalities (Q00-Q99)                    | 1.5        | 1.5        | 1.1        | 1.5        | 1.6        | 0.9        | 0.8        | 0.8        | 1.1        |
| Symptoms, signs and abnormal clinical and laboratory findings, not elsewhere classified (R00-R99) | 1.5        | 1.3        | 1.8        | 1.7        | 1.0        | 2.3        | 1.7        | 1.8        | 1.0        |
| External causes of morbidity and mortality (V01-X59, X85-Y98)                                     | 3.3        | 1.6        | 2.6        | 2.8        | 3.1        | 3.1        | 3.2        | 2.6        | 3.5        |
| External causes of morbidity and mortality (intentional) (X60-X84)                                | 0.4        | 0.4        | 0.1        | 0.4        | 0.4        | 0.8        | 0.2        | 0.3        | 1.0        |
| <b>Total (n)</b>                                                                                  | <b>521</b> | <b>687</b> | <b>761</b> | <b>785</b> | <b>836</b> | <b>874</b> | <b>886</b> | <b>956</b> | <b>987</b> |

## References

1. Ridsdale L, Charlton J, Ashworth M, et al. Epilepsy mortality and risk factors for death in epilepsy: a population-based study. *Br J Gen Pract* 2011;61(586):e271-8. doi: 10.3399/bjgp11X572463
2. Booth HP, Prevost AT, Gulliford MC. Validity of smoking prevalence estimates from primary care electronic health records compared with national population survey data for England, 2007 to 2011. *Pharmacoepidemiol Drug Saf* 2013;22(12):1357-61. doi: 10.1002/pds.3537
